# Supplementary material for: Gene Expression Profiling Reveals New Aspects of PIK3CA Mutation in ERalpha-Positive Breast Cancer: Major Implication of the Wnt Signaling Pathway
Source: PubMed Central journal article supplement (PMC3012715; doi:10.1371/journal.pone.0015647), 2010-12-30
Supplement: pone.0015647.s001.pdf [file pone.0015647.s001.pdf]

| Characteristic                              | Screening set<br>(n=43)  |                            |                             | Validation set<br>(n=249) |                            |                             |
|---------------------------------------------|--------------------------|----------------------------|-----------------------------|---------------------------|----------------------------|-----------------------------|
|                                             | Number<br>of<br>patients | Number<br>of events<br>(%) | MFS<br>p-value <sup>a</sup> | Number<br>of<br>patients  | Number<br>of events<br>(%) | MFS<br>p-value <sup>a</sup> |
| <b>Age</b>                                  |                          |                            | 0.037                       |                           |                            | 0.746                       |
| ≤ 70 years                                  | 26                       | 13 (50)                    |                             | 173                       | 72 (42)                    |                             |
| > 70 years                                  | 17                       | 3 (18)                     |                             | 76                        | 29 (38)                    |                             |
| <b>SBR histological grade<sup>b,c</sup></b> |                          |                            | 0.431                       |                           |                            | 0.136                       |
| I + II                                      | 31                       | 10 (32)                    |                             | 186                       | 71 (38)                    |                             |
| III                                         | 11                       | 6 (55)                     |                             | 59                        | 29 (49)                    |                             |
| <b>Lymph node status<sup>c</sup></b>        |                          |                            | 0.503                       |                           |                            | 0.022                       |
| Negative                                    | 28                       | 10 (36)                    |                             | 47                        | 13 (28)                    |                             |
| Positive                                    | 15                       | 6 (40)                     |                             | 198                       | 87 (44)                    |                             |
| <b>Macroscopic tumor size<sup>c</sup></b>   |                          |                            | 0.369                       |                           |                            | <0.0001                     |
| ≤ 30mm                                      | 32                       | 11 (34)                    |                             | 168                       | 56 (33)                    |                             |
| > 30mm                                      | 8                        | 5 (63)                     |                             | 75                        | 43 (57)                    |                             |
| <b>ERBB2 Status<sup>c</sup></b>             |                          |                            | 0.681                       |                           |                            | 0.681                       |
| Negative                                    | 38                       | 14 (37)                    |                             | 200                       | 83 (42)                    |                             |
| Positive                                    | 5                        | 2 (40)                     |                             | 48                        | 18 (38)                    |                             |
| <b>PIK3CA status</b>                        |                          |                            | 0.167                       |                           |                            | 0.472                       |
| Non mutated                                 | 29                       | 13 (45)                    |                             | 157                       | 65 (42)                    |                             |
| Mutated                                     | 14                       | 3 (21)                     |                             | 92                        | 36 (39)                    |                             |

<sup>a</sup> Log-rank test

<sup>b</sup> Scarff Bloom Richardson classification

<sup>c</sup> Histological information were not available for all tumors
