# Supplementary material for: Gene Expression Profiling Reveals New Aspects of PIK3CA Mutation in ERalpha-Positive Breast Cancer: Major Implication of the Wnt Signaling Pathway
Source: PubMed Central journal article supplement (PMC3012715; doi:10.1371/journal.pone.0015647), 2010-12-30
Supplement: pone.0015647.s002.pdf [file pone.0015647.s002.pdf]

| Index | Mutated* | Normal* | FC    | P value  | FDR** | Probe set   | Description                                                              | Gene symbol |
|-------|----------|---------|-------|----------|-------|-------------|--------------------------------------------------------------------------|-------------|
| 113   | 1342     | 128     | 10,52 | 0,000503 | 0,240 | 202018_s_at | Lactotransferrin                                                         | LTF         |
| 616   | 362      | 46,7    | 7,76  | 0,003493 | 0,308 | 237395_at   | Cytochrome P450, family 4, subfamily Z, polypeptide 1                    | CYP4Z1      |
| 3073  | 1009     | 142     | 7,10  | 0,021674 | 0,385 | 206378_at   | Secretoglobin, family 2A, member 2                                       | SCGB2A2     |
| 376   | 119      | 17,7    | 6,68  | 0,001962 | 0,284 | 214451_at   | Transcription factor AP-2 beta                                           | TFAP2B      |
| 578   | 337      | 60,5    | 5,57  | 0,003174 | 0,300 | 227702_at   | Cytochrome P450, family 4, subfamily X, polypeptide 1                    | CYP4X1      |
| 146   | 210      | 38,4    | 5,47  | 0,000669 | 0,244 | 219768_at   | V-set domain containing T cell activation inhibitor 1                    | VTCN1       |
| 86    | 129      | 24,2    | 5,31  | 0,000327 | 0,201 | 204607_at   | 3-hydroxy-3-methylglutaryl-Coenzyme A synthase 2 (mitochondrial)         | HMGCS2      |
| 2613  | 78,7     | 15,9    | 4,95  | 0,017744 | 0,371 | 205358_at   | Glutamate receptor, ionotropic, AMPA 2                                   | GRIA2       |
| 116   | 23,2     | 4,83    | 4,81  | 0,000513 | 0,240 | 203908_at   | Solute carrier family 4, sodium bicarbonate cotransporter, member 4      | SLC4A4      |
| 117   | 79,4     | 18,0    | 4,42  | 0,000518 | 0,240 | 239723_at   | Solute carrier family 40 (iron-regulated transporter), member 1          | SLC40A1     |
| 625   | 56,6     | 13,0    | 4,34  | 0,003549 | 0,308 | 1553394_a_a | Transcription factor AP-2 beta                                           | TFAP2B      |
| 413   | 148      | 34,6    | 4,28  | 0,002175 | 0,286 | 240304_s_at | Transmembrane channel-like 5                                             | TMCS        |
| 5181  | 216      | 50,9    | 4,25  | 0,039946 | 0,421 | 223864_at   | Ankyrin repeat domain 30A                                                | ANKRD30A    |
| 179   | 446      | 106     | 4,21  | 0,000826 | 0,244 | 223315_at   | Netrin 4                                                                 | NTN4        |
| 246   | 120      | 29,2    | 4,12  | 0,001128 | 0,251 | 210096_at   | Cytochrome P450, family 4, subfamily B, polypeptide 1                    | CYP4B1      |
| 1043  | 312      | 80,2    | 3,89  | 0,006080 | 0,319 | 204041_at   | Monoamine oxidase B                                                      | MAOB        |
| 192   | 44,1     | 11,6    | 3,80  | 0,000899 | 0,244 | 1553434_at  | Cytochrome P450 4Z2 pseudogene                                           | CYP4Z2P     |
| 2038  | 52,4     | 14,3    | 3,65  | 0,013273 | 0,355 | 211682_x_at | UDP glucuronosyltransferase 2 family, polypeptide B28                    | UGT2B28     |
| 819   | 69,6     | 19,6    | 3,54  | 0,004678 | 0,312 | 218963_s_at | Keratin 23 (histone deacetylase inducible)                               | KRT23       |
| 451   | 56,1     | 15,9    | 3,53  | 0,002410 | 0,288 | 230238_at   | Ankyrin repeat domain 43                                                 | ANKRD43     |
| 177   | 85,8     | 24,3    | 3,52  | 0,000819 | 0,244 | 202888_s_at | Alanyl (membrane) aminopeptidase                                         | ANPEP       |
| 1     | 40,9     | 11,9    | 3,43  | 0,000004 | 0,099 | 231227_at   | Wingless-type MMTV integration site family, member 5A                    | WNT5A       |
| 1208  | 121      | 35,3    | 3,42  | 0,007161 | 0,324 | 219580_s_at | Transmembrane channel-like 5                                             | TMCS        |
| 118   | 171      | 51,7    | 3,30  | 0,000526 | 0,240 | 204364_s_at | Receptor accessory protein 1                                             | REEP1       |
| 680   | 15,2     | 4,62    | 3,29  | 0,003908 | 0,308 | 232277_at   | Solute carrier family 28 member 3                                        | SLC28A3     |
| 48    | 91,7     | 28,0    | 3,28  | 0,000195 | 0,201 | 219557_s_at | Nuclear receptor interacting protein 3                                   | NRIP3       |
| 1871  | 339      | 105     | 3,24  | 0,012080 | 0,353 | 204014_at   | Dual specificity phosphatase 4                                           | DUSP4       |
| 1000  | 123      | 38,0    | 3,23  | 0,005782 | 0,316 | 203355_s_at | Pleckstrin and Sec7 domain containing 3                                  | PSD3        |
| 521   | 80,7     | 25,4    | 3,18  | 0,002775 | 0,291 | 219630_at   | PDZK1 interacting protein 1                                              | PDZK1IP1    |
| 3570  | 73,4     | 23,7    | 3,10  | 0,025784 | 0,394 | 226147_s_at | Polymeric immunoglobulin receptor                                        | PIGR        |
| 1001  | 20,8     | 6,75    | 3,08  | 0,005791 | 0,316 | 238133_at   | Netrin G1                                                                | NTNG1       |
| 2553  | 1238     | 402     | 3,08  | 0,017275 | 0,370 | 219197_s_at | Signal peptide, CUB domain, EGF-like 2                                   | SCUBE2      |
| 6088  | 237      | 77,6    | 3,06  | 0,049699 | 0,446 | 229764_at   | Tumor protein p63 regulated 1                                            | TPRG1       |
| 133   | 66,1     | 21,7    | 3,05  | 0,000589 | 0,240 | 230316_at   | SEC14-like 2 (S. cerevisiae)                                             | SEC14L2     |
| 102   | 79,0     | 26,1    | 3,03  | 0,000402 | 0,216 | 204541_at   | SEC14-like 2 (S. cerevisiae)                                             | SEC14L2     |
| 53    | 19,2     | 6,32    | 3,03  | 0,000205 | 0,201 | 209292_at   | Inhibitor of DNA binding 4, dominant negative helix-loop-helix           | ID4         |
| 98    | 28,1     | 9,36    | 3,00  | 0,000382 | 0,213 | 204855_at   | Serpin peptidase inhibitor, clade B (ovalbumin), member 5                | SERPINB5    |
| 150   | 1110     | 371     | 2,99  | 0,000691 | 0,244 | 227556_at   | Nucleoside diphosphate kinase 7                                          | NME7        |
| 4302  | 326      | 110     | 2,97  | 0,032016 | 0,407 | 212774_at   | Zinc finger protein 238                                                  | ZNF238      |
| 1484  | 65,9     | 22,2    | 2,97  | 0,009119 | 0,336 | 220177_s_at | Transmembrane protease, serine 3                                         | TMPRSS3     |
| 15    | 129      | 43,4    | 2,96  | 0,000054 | 0,191 | 209291_at   | Inhibitor of DNA binding 4, dominant negative helix-loop-helix           | ID4         |
| 268   | 204      | 68,9    | 2,96  | 0,001277 | 0,260 | 217966_s_at | Family with sequence similarity 129, member A                            | FAM129A     |
| 55    | 110      | 37,1    | 2,96  | 0,000212 | 0,201 | 212325_at   | LIM and calponin homology domains 1                                      | LIMCH1      |
| 987   | 113      | 38,1    | 2,96  | 0,005695 | 0,315 | 222904_s_at | Transmembrane channel-like 5                                             | TMCS        |
| 227   | 40,0     | 13,6    | 2,93  | 0,001050 | 0,250 | 222862_s_at | Adenylate kinase 5                                                       | AK5         |
| 284   | 177      | 60,7    | 2,92  | 0,001390 | 0,263 | 222288_at   | Hypothetical protein FLJ20489                                            | -           |
| 392   | 211      | 72,6    | 2,91  | 0,002058 | 0,285 | 227182_at   | Sushi domain containing 3                                                | SUSD3       |
| 389   | 45,7     | 15,8    | 2,89  | 0,002023 | 0,284 | 223949_at   | Transmembrane protease, serine 3                                         | TMPRSS3     |
| 194   | 26,6     | 9,28    | 2,87  | 0,000900 | 0,244 | 205513_at   | Transcobalamin I (vitamin B12 binding protein, R binder family)          | TCN1        |
| 1174  | 283      | 99,0    | 2,86  | 0,006896 | 0,321 | 204015_s_at | Dual specificity phosphatase 4                                           | DUSP4       |
| 555   | 78,8     | 27,6    | 2,85  | 0,003021 | 0,296 | 1553589_a_a | PDZK1 interacting protein 1                                              | PDZK1IP1    |
| 28    | 121      | 42,5    | 2,84  | 0,000131 | 0,201 | 205990_s_at | Wingless-type MMTV integration site family, member 5A                    | WNT5A       |
| 364   | 83,8     | 29,7    | 2,82  | 0,001899 | 0,284 | 203354_s_at | Pleckstrin and Sec7 domain containing 3                                  | PSD3        |
| 100   | 144      | 51,0    | 2,82  | 0,000390 | 0,213 | 206401_s_at | Microtubule-associated protein tau                                       | MAPT        |
| 72    | 46,1     | 16,4    | 2,81  | 0,000277 | 0,201 | 213425_at   | Wingless-type MMTV integration site family, member 5A                    | WNT5A       |
| 27    | 1769     | 641     | 2,76  | 0,000127 | 0,201 | 201242_s_at | ATPase, Na <sup>+</sup> /K <sup>+</sup> transporting, beta 1 polypeptide | ATP1B1      |
| 2139  | 167      | 61,4    | 2,72  | 0,014063 | 0,359 | 225728_at   | Sorbin and SH3 domain containing 2                                       | SORBS2      |

| Index | Mutated* | Normal* | FC   | P value  | FDR** | Probe set   | Description                                                       | Gene symbol         |
|-------|----------|---------|------|----------|-------|-------------|-------------------------------------------------------------------|---------------------|
| 204   | 183      | 67,2    | 2,72 | 0,000935 | 0,244 | 228481_at   | Periostin, osteoblast specific factor                             | <i>POSTN</i>        |
| 56    | 873      | 322     | 2,71 | 0,000216 | 0,201 | 201243_s_at | ATPase, Na+/K+ transporting, beta 1 polypeptide                   | <i>ATP1B1</i>       |
| 280   | 27,5     | 10,2    | 2,71 | 0,001368 | 0,263 | 219308_s_at | Adenylate kinase 5                                                | <i>AK5</i>          |
| 1117  | 21,9     | 8,12    | 2,70 | 0,006533 | 0,319 | 204455_at   | Dystonin                                                          | <i>DST</i>          |
| 548   | 23,9     | 8,88    | 2,69 | 0,002964 | 0,295 | 1563367_at  | Hypothetical protein LOC100128977                                 | <i>LOC100128977</i> |
| 3020  | 54,5     | 20,2    | 2,69 | 0,021271 | 0,385 | 207981_s_at | Estrogen-related receptor gamma                                   | <i>ESRRG</i>        |
| 19    | 273      | 101     | 2,69 | 0,000081 | 0,201 | 212328_at   | LIM and calponin homology domains 1                               | <i>LIMCH1</i>       |
| 1231  | 188      | 70,0    | 2,69 | 0,007320 | 0,324 | 204288_s_at | Sorbin and SH3 domain containing 2                                | <i>SORBS2</i>       |
| 1794  | 144      | 54,5    | 2,64 | 0,011486 | 0,350 | 203130_s_at | Kinesin family member 5C                                          | <i>KIF5C</i>        |
| 714   | 63,3     | 24,1    | 2,63 | 0,004096 | 0,308 | 227154_at   | Immunoglobulin superfamily, member 21                             | <i>IGSF21</i>       |
| 1524  | 47,2     | 18,0    | 2,62 | 0,009416 | 0,337 | 231098_at   | Transcribed locus                                                 | -                   |
| 375   | 43,6     | 16,7    | 2,61 | 0,001960 | 0,284 | 226847_at   | Follistatin                                                       | <i>FST</i>          |
| 590   | 59,4     | 22,9    | 2,59 | 0,003254 | 0,301 | 243806_at   | ST8 alpha-N-acetyl-neuraminide alpha-2,8-sialyltransferase 6      | <i>SIAT8F</i>       |
| 4089  | 55,1     | 21,3    | 2,58 | 0,030066 | 0,402 | 209480_at   | Major histocompatibility complex, class II, DQ beta 1             | <i>HLA-DQB1</i>     |
| 2399  | 588      | 228     | 2,58 | 0,015996 | 0,365 | 207847_s_at | Mucin 1, cell surface associated                                  | <i>MUC1</i>         |
| 1299  | 85,1     | 33,4    | 2,55 | 0,007740 | 0,325 | 219440_at   | Retinoic acid induced 2                                           | <i>RAI2</i>         |
| 256   | 57,6     | 22,6    | 2,55 | 0,001196 | 0,255 | 222900_at   | Nuclear receptor interacting protein 3                            | <i>NRIP3</i>        |
| 1455  | 103      | 40,5    | 2,53 | 0,008896 | 0,334 | 211000_s_at | Interleukin 6 signal transducer (gp130, oncostatin M receptor)    | <i>IL6ST</i>        |
| 5348  | 61,6     | 24,4    | 2,52 | 0,041927 | 0,429 | 209351_at   | Keratin 14                                                        | <i>KRT14</i>        |
| 196   | 44,4     | 17,8    | 2,50 | 0,000908 | 0,244 | 226029_at   | Vang-like 2 (van gogh, Drosophila)                                | <i>VANGL2</i>       |
| 166   | 193      | 77,3    | 2,49 | 0,000777 | 0,244 | 212327_at   | LIM and calponin homology domains 1                               | <i>LIMCH1</i>       |
| 141   | 86,0     | 34,5    | 2,49 | 0,000645 | 0,244 | 243030_at   | Mitogen-activated protein kinase kinase kinase 1                  | <i>MAP3K1</i>       |
| 90    | 242      | 97,2    | 2,49 | 0,000332 | 0,201 | 202149_at   | Neural precursor cell expressed, developmentally down-regulated 9 | <i>NEDD9</i>        |
| 1591  | 1263     | 509     | 2,48 | 0,009901 | 0,340 | 201667_at   | Gap junction protein, alpha 1, 43kDa                              | <i>GJA1</i>         |
| 1408  | 62,9     | 25,5    | 2,47 | 0,008513 | 0,330 | 224358_s_at | Membrane-spanning 4-domains, subfamily A, member 7                | <i>MS4A7</i>        |
| 5145  | 52,1     | 21,1    | 2,46 | 0,039615 | 0,421 | 213695_at   | Paraoxonase 3                                                     | <i>PON3</i>         |
| 1310  | 426      | 173     | 2,46 | 0,007819 | 0,325 | 217967_s_at | Family with sequence similarity 129, member A                     | <i>FAM129A</i>      |
| 8     | 359      | 146     | 2,46 | 0,000015 | 0,099 | 212240_s_at | Phosphoinositide-3-kinase, regulatory subunit 1 (p85 alpha)       | <i>PIK3R1</i>       |
| 658   | 41,6     | 17,1    | 2,43 | 0,003814 | 0,308 | 239907_at   | Transcribed locus                                                 | -                   |
| 2749  | 794      | 327     | 2,43 | 0,019005 | 0,378 | 202357_s_at | Complement factor B                                               | <i>CFB</i>          |
| 4852  | 55,2     | 22,8    | 2,42 | 0,036972 | 0,417 | 229030_at   | Calpain 8                                                         | <i>CAPN8</i>        |
| 2562  | 48,7     | 20,1    | 2,42 | 0,017375 | 0,371 | 209369_at   | Annexin A3                                                        | <i>ANXA3</i>        |
| 4     | 168      | 69,6    | 2,41 | 0,000011 | 0,099 | 203407_at   | Periplakin                                                        | <i>PPL</i>          |
| 1198  | 49,1     | 20,3    | 2,41 | 0,007070 | 0,323 | 202037_s_at | Secreted frizzled-related protein 1                               | <i>SFRP1</i>        |
| 3864  | 30,6     | 12,7    | 2,41 | 0,028229 | 0,399 | 226884_at   | Leucine rich repeat neuronal 1                                    | <i>LRRN1</i>        |
| 2945  | 125      | 52,0    | 2,41 | 0,020642 | 0,383 | 203021_at   | Secretory leukocyte peptidase inhibitor                           | <i>SLPI</i>         |
| 450   | 144      | 60,4    | 2,38 | 0,002404 | 0,288 | 203928_x_at | Microtubule-associated protein tau                                | <i>MAPT</i>         |
| 1985  | 561      | 236     | 2,37 | 0,012957 | 0,355 | 204320_at   | Collagen, type XI, alpha 1                                        | <i>COL11A1</i>      |
| 3267  | 738      | 312     | 2,37 | 0,023215 | 0,388 | 37892_at    | Collagen, type XI, alpha 1                                        | <i>COL11A1</i>      |
| 4326  | 257      | 109     | 2,37 | 0,032194 | 0,407 | 226034_at   | cDNA clone IMAGE:3881549                                          | -                   |
| 101   | 108      | 45,5    | 2,36 | 0,000401 | 0,216 | 229518_at   | Family with sequence similarity 46, member B                      | <i>FAM46B</i>       |
| 1352  | 56,7     | 24,0    | 2,36 | 0,008118 | 0,328 | 235651_at   | -                                                                 | -                   |
| 1318  | 39,3     | 16,7    | 2,36 | 0,007843 | 0,325 | 213060_s_at | Chitinase 3-like 2                                                | <i>CHI3L2</i>       |
| 1191  | 87,5     | 37,3    | 2,35 | 0,007032 | 0,322 | 203240_at   | FC fragment of IgG binding protein                                | <i>FCGBP</i>        |
| 66    | 59,8     | 25,5    | 2,35 | 0,000251 | 0,201 | 241459_at   | LIM and calponin homology domains 1                               | <i>LIMCH1</i>       |
| 2729  | 121      | 51,6    | 2,34 | 0,018795 | 0,377 | 225871_at   | Six transmembrane epithelial antigen of the prostate 2            | <i>STEAP2</i>       |
| 1053  | 74,8     | 32,0    | 2,34 | 0,006149 | 0,319 | 1555497_a_a | Cytochrome P450, family 4, subfamily B, polypeptide 1             | <i>CYP4B1</i>       |
| 49    | 101      | 43,2    | 2,34 | 0,000195 | 0,201 | 212249_at   | Phosphoinositide-3-kinase, regulatory subunit 1 (p85 alpha)       | <i>PIK3R1</i>       |
| 1336  | 124      | 53,1    | 2,33 | 0,008019 | 0,328 | 228648_at   | Leucine-rich alpha-2-glycoprotein 1                               | <i>LRG1</i>         |
| 1772  | 94,8     | 40,7    | 2,33 | 0,011296 | 0,348 | 218613_at   | Pleckstrin and Sec7 domain containing 3                           | <i>PSD3</i>         |
| 154   | 251      | 108     | 2,32 | 0,000703 | 0,244 | 206385_s_at | Ankyrin 3, node of Ranvier (ankyrin G)                            | <i>ANK3</i>         |
| 1550  | 110      | 47,4    | 2,31 | 0,009560 | 0,337 | 204863_s_at | Interleukin 6 signal transducer (oncostatin M receptor)           | <i>IL6ST</i>        |
| 1876  | 284      | 123     | 2,31 | 0,012131 | 0,354 | 204284_at   | Protein phosphatase 1, regulatory (inhibitor) subunit 3C          | <i>PPP1R3C</i>      |
| 2291  | 11,7     | 5,10    | 2,30 | 0,015235 | 0,363 | 244623_at   | Potassium voltage-gated channel, KQT-like subfamily, member 5     | <i>KCNQ5</i>        |
| 631   | 261      | 114     | 2,30 | 0,003570 | 0,308 | 226597_at   | Receptor accessory protein 6                                      | <i>REEP6</i>        |
| 2117  | 101      | 44,3    | 2,29 | 0,013891 | 0,359 | 233123_at   | Solute carrier family 40 (iron-regulated transporter), member 1   | <i>SLC40A1</i>      |
| 5206  | 57,5     | 25,1    | 2,29 | 0,040172 | 0,422 | 203485_at   | Reticulon 1                                                       | <i>RTN1</i>         |

| Index | Mutated* | Normal* | FC   | P value  | FDR** | Probe set     | Description                                                         | Gene symbol |
|-------|----------|---------|------|----------|-------|---------------|---------------------------------------------------------------------|-------------|
| 857   | 26,6     | 11,7    | 2,28 | 0,004948 | 0,313 | 209900_s_at   | Solute carrier family 16, member 1                                  | SLC16A1     |
| 1366  | 338      | 149     | 2,27 | 0,008221 | 0,328 | 232458_at     | Collagen, type III, alpha 1                                         | COL3A1      |
| 2300  | 1064     | 468     | 2,27 | 0,015280 | 0,363 | 213693_s_at   | Mucin 1, cell surface associated                                    | MUC1        |
| 579   | 119      | 52,4    | 2,27 | 0,003176 | 0,300 | 203929_s_at   | Microtubule-associated protein tau                                  | MAPT        |
| 1376  | 307      | 136     | 2,27 | 0,008295 | 0,329 | 229218_at     | Collagen, type I, alpha 2                                           | COL1A2      |
| 745   | 141      | 62,3    | 2,27 | 0,004223 | 0,308 | 213110_s_at   | Collagen, type IV, alpha 5                                          | COL4A5      |
| 1138  | 991      | 438     | 2,26 | 0,006647 | 0,319 | 223044_at     | Solute carrier family 40 (iron-regulated transporter), member 1     | SLC40A1     |
| 933   | 257      | 114     | 2,25 | 0,005358 | 0,313 | 235371_at     | Glycosyltransferase 8 domain containing 4                           | GLT8D4      |
| 5445  | 36,7     | 16,3    | 2,25 | 0,042949 | 0,431 | 222853_at     | Fibronectin leucine rich transmembrane protein 3                    | FLRT3       |
| 3180  | 161      | 71,7    | 2,24 | 0,022552 | 0,387 | 203058_s_at   | 3'-phosphoadenosine 5'-phosphosulfate synthase 2                    | PAPSS2      |
| 835   | 376      | 168     | 2,24 | 0,004769 | 0,312 | 223343_at     | Membrane-spanning 4-domains, subfamily A, member 7                  | MS4A7       |
| 431   | 29,8     | 13,3    | 2,24 | 0,002272 | 0,288 | 211828_s_at   | TRAF2 and NCK interacting kinase                                    | TNIK        |
| 93    | 27,7     | 12,4    | 2,23 | 0,000347 | 0,204 | 229994_at     | Glyceronephosphate O-acyltransferase                                | GNPAT       |
| 563   | 122      | 54,9    | 2,23 | 0,003070 | 0,298 | 204365_s_at   | Receptor accessory protein 1                                        | REEP1       |
| 3763  | 189      | 84,7    | 2,23 | 0,027356 | 0,397 | 239435_x_at   | Shroom family member 1                                              | SHROOM1     |
| 1093  | 86,2     | 38,7    | 2,23 | 0,006408 | 0,319 | 226992_at     | Nitric oxide synthase trafficker                                    | NOSTRIN     |
| 4697  | 16,0     | 7,21    | 2,23 | 0,035470 | 0,413 | 235763_at     | Solute carrier family 44, member 5                                  | SLC44A5     |
| 203   | 442      | 199     | 2,22 | 0,000934 | 0,244 | 225464_at     | FERM domain containing 6                                            | FRMD6       |
| 18    | 439      | 199     | 2,21 | 0,000076 | 0,201 | 222450_at     | Transmembrane, prostate androgen induced RNA                        | TMEPAI      |
| 1763  | 316      | 143     | 2,21 | 0,011236 | 0,348 | 209459_s_at   | 4-aminobutyrate aminotransferase                                    | ABAT        |
| 134   | 105      | 47,9    | 2,20 | 0,000589 | 0,240 | 203887_s_at   | Thrombomodulin                                                      | THBD        |
| 220   | 399      | 181     | 2,20 | 0,001017 | 0,250 | 225481_at     | FERM domain containing 6                                            | FRMD6       |
| 1431  | 32,4     | 14,7    | 2,20 | 0,008679 | 0,331 | 213680_at     | Keratin 6B                                                          | KRT6B       |
| 890   | 287      | 131     | 2,20 | 0,005141 | 0,313 | 227811_at     | FYVE, RhoGEF and PH domain containing 3                             | FGD3        |
| 3541  | 47,0     | 21,4    | 2,20 | 0,025480 | 0,393 | 229659_s_at   | Polymeric immunoglobulin receptor                                   | PIGR        |
| 85    | 182      | 83,0    | 2,19 | 0,000327 | 0,201 | 204446_s_at   | Arachidonate 5-lipoxygenase                                         | ALOX5       |
| 1937  | 43,7     | 19,9    | 2,19 | 0,012616 | 0,355 | 227019_at     | Chromosome 1 open reading frame 226                                 | C1orf226    |
| 4745  | 12,9     | 5,89    | 2,19 | 0,035948 | 0,414 | 213992_at     | Collagen, type IV, alpha 6                                          | COL4A6      |
| 199   | 14,0     | 6,40    | 2,19 | 0,000924 | 0,244 | 243952_at     | TPTP pseudogene                                                     | psiTPTP22   |
| 44    | 49,0     | 22,4    | 2,18 | 0,000181 | 0,201 | 211965_at     | Zinc finger protein 36, C3H type-like 1                             | ZFP36L1     |
| 10    | 66,8     | 30,6    | 2,18 | 0,000035 | 0,180 | 212762_s_at   | Transcription factor 7-like 2 (T-cell specific, HMG-box)            | TCF7L2      |
| 343   | 17,2     | 7,89    | 2,18 | 0,001740 | 0,277 | 1558048_x_a - |                                                                     | -           |
| 5803  | 89,3     | 41,0    | 2,18 | 0,046848 | 0,441 | 204864_s_at   | Interleukin 6 signal transducer (gp130, oncostatin M receptor)      | IL6ST       |
| 594   | 54,4     | 25,0    | 2,18 | 0,003271 | 0,301 | 1558686_at    | cDNA clone YP99D02                                                  | -           |
| 3682  | 81,1     | 37,3    | 2,17 | 0,026584 | 0,395 | 205542_at     | Six transmembrane epithelial antigen of the prostate 1              | STEAP1      |
| 235   | 53,6     | 24,7    | 2,17 | 0,001089 | 0,250 | 210319_x_at   | MSH homeobox 2                                                      | MSX2        |
| 732   | 429      | 198     | 2,17 | 0,004183 | 0,308 | 217771_at     | Golgi membrane protein 1                                            | GOLM1       |
| 5833  | 1106     | 510     | 2,17 | 0,047131 | 0,442 | 214440_at     | N-acetyltransferase 1 (arylamine N-acetyltransferase)               | NAT1        |
| 7     | 86,9     | 40,2    | 2,16 | 0,000014 | 0,099 | 216511_s_at   | Transcription factor 7-like 2 (T-cell specific, HMG-box)            | TCF7L2      |
| 902   | 93,1     | 43,0    | 2,16 | 0,005222 | 0,313 | 213506_at     | Coagulation factor II (thrombin) receptor-like 1                    | F2RL1       |
| 1696  | 311      | 144     | 2,15 | 0,010779 | 0,347 | 209460_at     | 4-aminobutyrate aminotransferase                                    | ABAT        |
| 136   | 19,3     | 8,95    | 2,15 | 0,000608 | 0,244 | 244181_at     | Phosphoinositide-3-kinase, regulatory subunit 1 (p85 alpha)         | PIK3R1      |
| 3408  | 903      | 419     | 2,15 | 0,024308 | 0,390 | 214428_x_at   | Complement component 4A (Rodgers blood group)                       | C4A         |
| 3093  | 164      | 76,2    | 2,15 | 0,021805 | 0,385 | 212551_at     | CAP, adenylate cyclase-associated protein, 2 (yeast)                | CAP2        |
| 122   | 47,9     | 22,3    | 2,15 | 0,000566 | 0,240 | 219232_s_at   | EGL nine homolog 3 (C. elegans)                                     | EGLN3       |
| 2972  | 26,5     | 12,3    | 2,15 | 0,020878 | 0,384 | 226492_at     | Semaphorin 6D                                                       | SEMA6D      |
| 412   | 63,4     | 29,6    | 2,15 | 0,002172 | 0,286 | 240690_at     | Homolog of rat pragma of Rnd2                                       | PRAGMIN     |
| 391   | 17,8     | 8,30    | 2,14 | 0,002028 | 0,284 | 214981_at     | Periostin, osteoblast specific factor                               | POSTN       |
| 1850  | 712      | 334     | 2,14 | 0,011902 | 0,352 | 222453_at     | Cytochrome b reductase 1                                            | CYBRD1      |
| 258   | 19,2     | 8,98    | 2,13 | 0,001208 | 0,256 | 237839_at     | Ankyrin 3, node of Ranvier (ankyrin G)                              | ANK3        |
| 441   | 6,14     | 2,88    | 2,13 | 0,002341 | 0,288 | 210738_s_at   | Solute carrier family 4, sodium bicarbonate cotransporter, member 4 | SLC4A4      |
| 51    | 21,0     | 9,84    | 2,13 | 0,000198 | 0,201 | 209598_at     | Paraneoplastic antigen MA2                                          | PNMA2       |
| 463   | 15,4     | 7,24    | 2,13 | 0,002458 | 0,288 | 211494_s_at   | Solute carrier family 4, sodium bicarbonate cotransporter, member 4 | SLC4A4      |
| 92    | 251      | 118     | 2,13 | 0,000343 | 0,204 | 224975_at     | Nuclear factor I/A                                                  | NFIA        |
| 725   | 83,5     | 39,3    | 2,13 | 0,004146 | 0,308 | 221958_s_at   | G protein-coupled receptor 177                                      | GPR177      |
| 1340  | 316      | 149     | 2,12 | 0,008051 | 0,328 | 223344_s_at   | Membrane-spanning 4-domains, subfamily A, member 7                  | MS4A7       |
| 393   | 47,6     | 22,5    | 2,12 | 0,002074 | 0,285 | 230763_at     | Spermatogenesis associated 17                                       | SPATA17     |

| Index | Mutated* | Normal* | FC   | P value  | FDR** | Probe set   | Description                                                               | Gene symbol |
|-------|----------|---------|------|----------|-------|-------------|---------------------------------------------------------------------------|-------------|
| 325   | 14,5     | 6,85    | 2,12 | 0,001626 | 0,272 | 240024_at   | SEC14-like 2 (S. cerevisiae)                                              | SEC14L2     |
| 3988  | 93,1     | 44,0    | 2,12 | 0,029178 | 0,400 | 209706_at   | NK3 homeobox 1                                                            | NKX3-1      |
| 439   | 14,6     | 6,90    | 2,12 | 0,002329 | 0,288 | 204933_s_at | Tumor necrosis factor receptor superfamily, member 11b                    | TNFRSF11B   |
| 205   | 7,77     | 3,67    | 2,12 | 0,000948 | 0,244 | 204932_at   | Tumor necrosis factor receptor superfamily, member 11b                    | TNFRSF11B   |
| 4197  | 1672     | 791     | 2,11 | 0,031024 | 0,404 | 208451_s_at | Complement component 4A (Rodgers blood group)                             | C4A         |
| 435   | 207      | 98,1    | 2,11 | 0,002300 | 0,288 | 221584_s_at | Calcium-activated potassium channel subunit alpha-1                       | KCNMA1      |
| 2064  | 192      | 91,6    | 2,10 | 0,013476 | 0,356 | 224996_at   | Aspartate beta-hydroxylase                                                | ASPH        |
| 5766  | 95,5     | 45,6    | 2,10 | 0,046334 | 0,439 | 204400_at   | Embryonal Fyn-associated substrate                                        | EFS         |
| 866   | 512      | 245     | 2,09 | 0,005012 | 0,313 | 221666_s_at | PYD and CARD domain containing                                            | PYCARD      |
| 5597  | 55,2     | 26,4    | 2,09 | 0,044640 | 0,436 | 206224_at   | Cystatin SN                                                               | CST1        |
| 410   | 17,2     | 8,21    | 2,09 | 0,002158 | 0,286 | 227051_at   | cDNA clone IMAGE:4393354                                                  | -           |
| 2670  | 15,2     | 7,27    | 2,09 | 0,018260 | 0,374 | 221933_at   | Neuroigin 4, X-linked                                                     | NLGN4X      |
| 1077  | 117      | 56,0    | 2,08 | 0,006317 | 0,319 | 215073_s_at | Nuclear receptor subfamily 2, group F, member 2                           | NR2F2       |
| 5     | 121      | 58,3    | 2,08 | 0,000012 | 0,099 | 216035_x_at | Transcription factor 7-like 2 (T-cell specific, HMG-box)                  | TCF7L2      |
| 2491  | 76,8     | 37,0    | 2,08 | 0,016787 | 0,367 | 211695_x_at | Mucin 1, cell surface associated                                          | MUC1        |
| 2197  | 58,5     | 28,3    | 2,07 | 0,014525 | 0,361 | 219412_at   | RAB38, member RAS oncogene family                                         | RAB38       |
| 679   | 28,2     | 13,6    | 2,07 | 0,003899 | 0,308 | 231929_at   | IKAROS family zinc finger 2 (Helios)                                      | IKZF2       |
| 3566  | 24,6     | 11,9    | 2,07 | 0,025741 | 0,394 | 1564241_at  | ATPase, Na <sup>+</sup> /K <sup>+</sup> transporting, alpha 4 polypeptide | ATP1A4      |
| 1412  | 42,1     | 20,3    | 2,07 | 0,008532 | 0,330 | 205541_s_at | G1 to S phase transition 2                                                | GSPT2       |
| 1543  | 22,6     | 11,0    | 2,06 | 0,009541 | 0,337 | 229510_at   | Membrane-spanning 4-domains, subfamily A, member 14                       | MS4A14      |
| 323   | 132      | 64,1    | 2,05 | 0,001612 | 0,272 | 214761_at   | Zinc finger protein 423                                                   | ZNF423      |
| 1226  | 9,02     | 4,39    | 2,05 | 0,007288 | 0,324 | 206522_at   | Maltase-glucoamylase (alpha-glucosidase)                                  | MGAM        |
| 909   | 66,2     | 32,3    | 2,05 | 0,005249 | 0,313 | 242874_at   | cDNA FLJ37931 fis, clone CTONG2004397                                     | -           |
| 297   | 46,5     | 22,7    | 2,05 | 0,001451 | 0,263 | 203780_at   | Myelin protein zero-like 2                                                | MPZL2       |
| 1332  | 27,6     | 13,5    | 2,05 | 0,008004 | 0,328 | 227444_at   | Armadillo repeat containing, X-linked 4                                   | ARMCX4      |
| 30    | 45,9     | 22,6    | 2,03 | 0,000138 | 0,201 | 222027_at   | Nuclear casein kinase and cyclin-dependent kinase substrate 1             | NUCKS1      |
| 184   | 33,8     | 16,7    | 2,03 | 0,000854 | 0,244 | 232968_at   | Fibronectin type III and ankyrin repeat domains 1                         | FANK1       |
| 5840  | 56,5     | 27,9    | 2,03 | 0,047191 | 0,442 | 210222_s_at | Reticulon 1                                                               | RTN1        |
| 63    | 355      | 175     | 2,02 | 0,000237 | 0,201 | 222449_at   | Transmembrane, prostate androgen induced RNA                              | TMEPAI      |
| 271   | 240      | 119     | 2,02 | 0,001298 | 0,261 | 235085_at   | Homolog of rat pragma of Rnd2                                             | PRAGMIN     |
| 3919  | 16,5     | 8,17    | 2,02 | 0,028625 | 0,399 | 220625_s_at | E74-like factor 5 (ets domain transcription factor)                       | ELF5        |
| 5086  | 68,5     | 33,9    | 2,02 | 0,039151 | 0,420 | 208228_s_at | Fibroblast growth factor receptor 2                                       | FGFR2       |
| 130   | 360      | 179     | 2,02 | 0,000581 | 0,240 | 226806_s_at | Nuclear factor I/A                                                        | NFIA        |
| 2273  | 146      | 72,6    | 2,02 | 0,015097 | 0,363 | 204285_s_at | Phorbol-12-myristate-13-acetate-induced protein 1                         | PMAIP1      |
| 2318  | 75,1     | 37,3    | 2,01 | 0,015395 | 0,363 | 202236_s_at | Solute carrier family 16, member 1                                        | SLC16A1     |
| 115   | 222      | 110     | 2,01 | 0,000512 | 0,240 | 212239_at   | Phosphoinositide-3-kinase, regulatory subunit 1 (p85 alpha)               | PIK3R1      |
| 888   | 69,3     | 34,4    | 2,01 | 0,005128 | 0,313 | 204463_s_at | Endothelin receptor type A                                                | EDNRA       |
| 34    | 46,6     | 23,2    | 2,01 | 0,000146 | 0,201 | 201340_s_at | Ectodermal-neural cortex (with BTB-like domain)                           | ENC1        |
| 2665  | 17,9     | 8,91    | 2,01 | 0,018221 | 0,374 | 232124_at   | Family with sequence similarity 198, member A                             | C3orf41     |
| 842   | 447      | 223     | 2,01 | 0,004825 | 0,313 | 223125_s_at | Chromosome 1 open reading frame 21                                        | C1orf21     |
| 4412  | 321      | 160     | 2,01 | 0,032952 | 0,408 | 203060_s_at | 3'-phosphoadenosine 5'-phosphosulfate synthase 2                          | PAPSS2      |
| 3319  | 98,2     | 48,9    | 2,01 | 0,023586 | 0,388 | 225123_at   | Sestrin 3                                                                 | SESN3       |
| 593   | 128      | 63,9    | 2,00 | 0,003271 | 0,301 | 227514_at   | Inositol 1,4,5-triphosphate receptor interacting protein-like 2           | ITPR1L2     |
| 3074  | 84,4     | 42,2    | 2,00 | 0,021681 | 0,385 | 230364_at   | Choline phosphotransferase 1                                              | CHPT1       |
| 864   | 45,6     | 22,8    | 2,00 | 0,004994 | 0,313 | 204363_at   | Coagulation factor III (thromboplastin, tissue factor)                    | F3          |
| 4951  | 14,7     | 7,35    | 1,99 | 0,037975 | 0,419 | 1552767_a_a | Heparan sulfate 6-O-sulfotransferase 2                                    | HS6ST2      |
| 785   | 115      | 57,8    | 1,99 | 0,004493 | 0,311 | 212915_at   | PDZ domain containing RING finger 3                                       | PDZRN3      |
| 197   | 26,3     | 13,2    | 1,99 | 0,000911 | 0,244 | 242903_at   | Interferon gamma receptor 1                                               | IFNGR1      |
| 1802  | 15,1     | 7,55    | 1,99 | 0,011600 | 0,351 | 202234_s_at | Solute carrier family 16, member 1                                        | SLC16A1     |
| 157   | 44,0     | 22,1    | 1,99 | 0,000708 | 0,244 | 222847_s_at | EGL nine homolog 3 (C. elegans)                                           | EGLN3       |
| 5541  | 110      | 55,4    | 1,99 | 0,044049 | 0,435 | 223278_at   | Gap junction protein, beta 2, 26kDa                                       | GJB2        |
| 148   | 12,6     | 6,36    | 1,99 | 0,000682 | 0,244 | 235952_at   | Transcribed locus                                                         | -           |
| 5819  | 36,2     | 18,2    | 1,98 | 0,047031 | 0,442 | 233814_at   | Ephrin-A5                                                                 | EFNA5       |
| 336   | 536      | 271     | 1,98 | 0,001715 | 0,277 | 209121_x_at | Nuclear receptor subfamily 2, group F, member 2                           | NR2F2       |
| 326   | 371      | 188     | 1,98 | 0,001629 | 0,272 | 230958_s_at | Glyceronephosphate O-acyltransferase                                      | GNPAT       |
| 1007  | 51,4     | 26,0    | 1,97 | 0,005834 | 0,316 | 230788_at   | I beta-1,6-N-acetylglucosaminyltransferase                                | GCNT2       |
| 574   | 40,4     | 20,5    | 1,97 | 0,003154 | 0,300 | 1569607_s_a | Ankyrin repeat domain 20 family, member A1                                | ANKRD20A1   |

| Index | Mutated* | Normal* | FC   | P value  | FDR** | Probe set   | Description                                                 | Gene symbol      |
|-------|----------|---------|------|----------|-------|-------------|-------------------------------------------------------------|------------------|
| 206   | 278      | 141     | 1,97 | 0,000950 | 0,244 | 202709_at   | Fibromodulin                                                | <i>FMOD</i>      |
| 327   | 133      | 67,8    | 1,96 | 0,001630 | 0,272 | 226084_at   | Microtubule-associated protein 1B                           | <i>MAP1B</i>     |
| 4066  | 254      | 129     | 1,96 | 0,029819 | 0,401 | 231766_s_at | Collagen, type XII, alpha 1                                 | <i>COL12A1</i>   |
| 274   | 21,8     | 11,1    | 1,96 | 0,001313 | 0,262 | 244026_at   | Elongation factor, RNA polymerase II, 2                     | <i>ELL2</i>      |
| 126   | 21,6     | 11,0    | 1,96 | 0,000574 | 0,240 | 226885_at   | Transcribed locus                                           | -                |
| 5995  | 83,6     | 42,7    | 1,96 | 0,048745 | 0,444 | 225008_at   | Aspartate beta-hydroxylase                                  | <i>ASPH</i>      |
| 638   | 162      | 82,8    | 1,96 | 0,003626 | 0,308 | 209522_s_at | Carnitine acetyltransferase                                 | <i>CRAT</i>      |
| 2964  | 817      | 418     | 1,96 | 0,020824 | 0,384 | 209875_s_at | Secreted phosphoprotein 1                                   | <i>SPP1</i>      |
| 4037  | 19,6     | 10,0    | 1,96 | 0,029579 | 0,401 | 1564358_at  | cDNA FLJ22631 fis, clone HSI06451                           | -                |
| 1339  | 46,5     | 23,8    | 1,95 | 0,008044 | 0,328 | 213107_at   | TRAF2 and NCK interacting kinase                            | <i>TNIK</i>      |
| 67    | 190      | 97,1    | 1,95 | 0,000252 | 0,201 | 224976_at   | Nuclear factor I/A                                          | <i>NFIA</i>      |
| 2711  | 13,9     | 7,09    | 1,95 | 0,018609 | 0,375 | 205044_at   | Gamma-aminobutyric acid (GABA) A receptor, pi               | <i>GABRP</i>     |
| 4813  | 273      | 140     | 1,95 | 0,036577 | 0,416 | 203917_at   | Coxsackie virus and adenovirus receptor                     | <i>CXADR</i>     |
| 211   | 44,3     | 22,7    | 1,95 | 0,000957 | 0,244 | 203888_at   | Thrombomodulin                                              | <i>THBD</i>      |
| 756   | 160      | 82,1    | 1,94 | 0,004275 | 0,308 | 225379_at   | Microtubule-associated protein tau                          | <i>MAPT</i>      |
| 706   | 46,6     | 24,0    | 1,94 | 0,004054 | 0,308 | 227082_at   | cDNA DKFZp586K1922                                          | -                |
| 3238  | 708      | 365     | 1,94 | 0,022982 | 0,388 | 212196_at   | Interleukin 6 signal transducer (oncostatin M receptor)     | <i>IL6ST</i>     |
| 3165  | 45,8     | 23,6    | 1,94 | 0,022459 | 0,387 | 228221_at   | Solute carrier family 44, member 3                          | <i>SLC44A3</i>   |
| 4851  | 11,6     | 6,01    | 1,94 | 0,036961 | 0,417 | 204591_at   | Cell adhesion molecule L1-like                              | <i>CHL1</i>      |
| 1765  | 23,4     | 12,1    | 1,94 | 0,011260 | 0,348 | 205157_s_at | Keratin 17                                                  | <i>KRT17</i>     |
| 162   | 408      | 211     | 1,93 | 0,000746 | 0,244 | 224970_at   | Nuclear factor I/A                                          | <i>NFIA</i>      |
| 556   | 22,1     | 11,4    | 1,93 | 0,003024 | 0,296 | 239768_x_at | G patch domain containing 2                                 | <i>GPATCH2</i>   |
| 1280  | 63,7     | 33,0    | 1,93 | 0,007616 | 0,325 | 1556126_s_a | G patch domain containing 2                                 | <i>GPATCH2</i>   |
| 353   | 49,4     | 25,6    | 1,93 | 0,001807 | 0,279 | 233442_at   | PDZ domain containing ring finger 3                         | <i>PDZRN3</i>    |
| 4192  | 135      | 70,0    | 1,93 | 0,030967 | 0,404 | 212554_at   | CAP, adenylate cyclase-associated protein, 2 (yeast)        | <i>CAP2</i>      |
| 654   | 826      | 428     | 1,93 | 0,003769 | 0,308 | 228297_at   | Calponin 3, acidic                                          | <i>CNN3</i>      |
| 418   | 59,2     | 30,7    | 1,93 | 0,002193 | 0,286 | 214807_at   | cDNA DKFZp564O0862                                          | -                |
| 2379  | 63,4     | 32,9    | 1,93 | 0,015858 | 0,364 | 232113_at   | Hypothetical protein LOC399959                              | <i>LOC399959</i> |
| 193   | 43,0     | 22,3    | 1,93 | 0,000899 | 0,244 | 210021_s_at | Cyclin O                                                    | <i>CCNO</i>      |
| 537   | 12,0     | 6,22    | 1,93 | 0,002890 | 0,293 | 1569208_a_a | LIM and calponin homology domains 1                         | <i>LIMCH1</i>    |
| 1674  | 16,5     | 8,56    | 1,92 | 0,010559 | 0,345 | 219250_s_at | Fibronectin leucine rich transmembrane protein 3            | <i>FLRT3</i>     |
| 17    | 364      | 190     | 1,92 | 0,000068 | 0,201 | 212761_at   | Transcription factor 7-like 2 (T-cell specific, HMG-box)    | <i>TCF7L2</i>    |
| 1044  | 38,3     | 20,0    | 1,92 | 0,006098 | 0,319 | 228949_at   | G protein-coupled receptor 177                              | <i>GPR177</i>    |
| 3550  | 157      | 81,8    | 1,92 | 0,025564 | 0,394 | 221841_s_at | Kruppel-like factor 4 (gut)                                 | <i>KLF4</i>      |
| 1792  | 8,09     | 4,23    | 1,91 | 0,011482 | 0,350 | 1569344_a_a | cDNA clone IMAGE:4044872                                    | -                |
| 3614  | 6,01     | 3,16    | 1,90 | 0,026086 | 0,395 | 214601_at   | Tryptophan hydroxylase 1 (tryptophan 5-monoxygenase)        | <i>TPH1</i>      |
| 1028  | 61,6     | 32,4    | 1,90 | 0,005949 | 0,316 | 215856_at   | Sialic acid binding Ig-like lectin 15                       | <i>SIGLEC15</i>  |
| 3961  | 101      | 53,5    | 1,90 | 0,028941 | 0,399 | 224221_s_at | Vav 3 guanine nucleotide exchange factor                    | <i>VAV3</i>      |
| 1467  | 48,6     | 25,7    | 1,90 | 0,008976 | 0,334 | 206483_at   | Leucine rich repeat containing 6                            | <i>LRRC6</i>     |
| 68    | 66,6     | 35,2    | 1,90 | 0,000259 | 0,201 | 242829_x_at | F-box and leucine-rich repeat protein 3                     | <i>FBXL3</i>     |
| 245   | 55,1     | 29,1    | 1,89 | 0,001128 | 0,251 | 243963_at   | Serologically defined colon cancer antigen 8                | <i>SDCCAG8</i>   |
| 3417  | 65,9     | 34,8    | 1,89 | 0,024406 | 0,391 | 205948_at   | Protein tyrosine phosphatase, receptor type, T              | <i>PTPRT</i>     |
| 1418  | 22,2     | 11,7    | 1,89 | 0,008595 | 0,331 | 219890_at   | C-type lectin domain family 5, member A                     | <i>CLECSA</i>    |
| 5018  | 530      | 280     | 1,89 | 0,038593 | 0,420 | 219087_at   | Asporin                                                     | <i>ASPN</i>      |
| 139   | 42,2     | 22,4    | 1,89 | 0,000631 | 0,244 | 239392_s_at | Pogo transposable element with KRAB domain                  | <i>POGK</i>      |
| 1447  | 80,2     | 42,5    | 1,89 | 0,008803 | 0,333 | 222529_at   | Solute carrier family 25, member 37                         | <i>SLC25A37</i>  |
| 2680  | 128      | 68,0    | 1,88 | 0,018347 | 0,374 | 223126_s_at | Chromosome 1 open reading frame 21                          | <i>C1orf21</i>   |
| 36    | 36,6     | 19,5    | 1,88 | 0,000149 | 0,201 | 239476_at   | Phosphoinositide-3-kinase, regulatory subunit 1 (p85 alpha) | <i>PIK3R1</i>    |
| 2551  | 11,5     | 6,13    | 1,88 | 0,017269 | 0,370 | 237183_at   | Polypeptide N-acetylgalactosaminyltransferase 5             | <i>GALNT5</i>    |
| 1443  | 21,7     | 11,6    | 1,87 | 0,008776 | 0,332 | 1554712_a_a | Glycine-N-acyltransferase-like 2                            | <i>GLYATL2</i>   |
| 4613  | 2309     | 1236    | 1,87 | 0,034825 | 0,412 | 202286_s_at | Tumor-associated calcium signal transducer 2                | <i>TACSTD2</i>   |
| 716   | 81,8     | 43,9    | 1,86 | 0,004115 | 0,308 | 226985_at   | FYVE, RhoGEF and PH domain containing 5                     | <i>FGD5</i>      |
| 3035  | 53,9     | 29,0    | 1,86 | 0,021394 | 0,385 | 209493_at   | PDZ domain containing 2                                     | <i>PDZD2</i>     |
| 1284  | 65,4     | 35,1    | 1,86 | 0,007646 | 0,325 | 241769_at   | Vitronectin receptor subunit alpha (antigen CD51)           | <i>ITGAV</i>     |
| 1213  | 73,7     | 39,6    | 1,86 | 0,007201 | 0,324 | 226909_at   | KIAA1729 protein                                            | <i>KIAA1729</i>  |
| 11    | 115      | 61,9    | 1,86 | 0,000037 | 0,180 | 216037_x_at | Transcription factor 7-like 2 (T-cell specific, HMG-box)    | <i>TCF7L2</i>    |
| 123   | 8,86     | 4,78    | 1,86 | 0,000566 | 0,240 | 240361_at   | -                                                           | -                |

| Index | Mutated* | Normal* | FC   | P value  | FDR** | Probe set   | Description                                                          | Gene symbol      |
|-------|----------|---------|------|----------|-------|-------------|----------------------------------------------------------------------|------------------|
| 646   | 49,9     | 26,9    | 1,85 | 0,003673 | 0,308 | 1557527_at  | Runt-related transcription factor 1 (aml1 oncogene)                  | <i>RUNX1</i>     |
| 2659  | 52,9     | 28,6    | 1,85 | 0,018154 | 0,373 | 243729_at   | cDNA FLJ37931 fis, clone CTONG2004397                                | -                |
| 886   | 78,4     | 42,4    | 1,85 | 0,005117 | 0,313 | 212736_at   | Chromosome 16 open reading frame 45                                  | <i>C16orf45</i>  |
| 3172  | 333      | 180     | 1,85 | 0,022504 | 0,387 | 232615_at   | Phosphodiesterase 4D interacting protein                             | <i>PDE4DIP</i>   |
| 5474  | 99,5     | 53,9    | 1,85 | 0,043272 | 0,432 | 204286_s_at | Phorbol-12-myristate-13-acetate-induced protein 1                    | <i>PMAIP1</i>    |
| 128   | 99,8     | 54,1    | 1,85 | 0,000575 | 0,240 | 225265_at   | RNA binding motif, single stranded interacting protein 1             | <i>RBMS1</i>     |
| 4993  | 107      | 58,1    | 1,85 | 0,038307 | 0,419 | 205613_at   | Synaptotagmin XVII                                                   | <i>SYT17</i>     |
| 1130  | 14,0     | 7,62    | 1,84 | 0,006590 | 0,319 | 220428_at   | CD207 molecule, langerin                                             | <i>CD207</i>     |
| 3771  | 59,7     | 32,4    | 1,84 | 0,027388 | 0,397 | 227812_at   | Tumor necrosis factor receptor superfamily, member 19                | <i>TNFRSF19</i>  |
| 742   | 390      | 212     | 1,84 | 0,004216 | 0,308 | 209120_at   | Nuclear receptor subfamily 2, group F, member 2                      | <i>NR2F2</i>     |
| 4224  | 126      | 68,4    | 1,84 | 0,031311 | 0,405 | 202986_at   | Aryl-hydrocarbon receptor nuclear translocator 2                     | <i>ARNT2</i>     |
| 96    | 13,4     | 7,31    | 1,84 | 0,000374 | 0,212 | 232125_at   | cDNA FLJ12166 fis, clone MAMMA1000616                                | -                |
| 54    | 266      | 145     | 1,84 | 0,000212 | 0,201 | 212614_at   | AT rich interactive domain 5B (MRF1-like)                            | <i>ARID5B</i>    |
| 2905  | 908      | 495     | 1,83 | 0,020424 | 0,383 | 217763_s_at | RAB31, member RAS oncogene family                                    | <i>RAB31</i>     |
| 2615  | 15,8     | 8,59    | 1,83 | 0,017764 | 0,371 | 232459_at   | Cytochrome b reductase 1                                             | <i>CYBRD1</i>    |
| 627   | 35,4     | 19,3    | 1,83 | 0,003559 | 0,308 | 240038_at   | Elongation factor, RNA polymerase II, 2                              | <i>ELL2</i>      |
| 2476  | 147      | 80,4    | 1,83 | 0,016668 | 0,367 | 1553132_a_a | Tandem C2 domains, nuclear                                           | <i>TC2N</i>      |
| 880   | 129      | 70,5    | 1,83 | 0,005093 | 0,313 | 223519_at   | Sterile alpha motif and leucine zipper containing kinase AZK         | <i>ZAK</i>       |
| 380   | 49,6     | 27,2    | 1,83 | 0,001979 | 0,284 | 202150_s_at | Neural precursor cell expressed, developmentally down-regulated 9    | <i>NEDD9</i>     |
| 1414  | 73,7     | 40,4    | 1,83 | 0,008557 | 0,331 | 238447_at   | RNA binding motif, single stranded interacting protein               | <i>RBMS3</i>     |
| 1583  | 16,2     | 8,86    | 1,82 | 0,009862 | 0,340 | 39549_at    | Neuronal PAS domain protein 2                                        | <i>NPAS2</i>     |
| 1906  | 5,29     | 2,90    | 1,82 | 0,012388 | 0,355 | 223810_at   | Kelch-like 1 (Drosophila)                                            | <i>KLHL1</i>     |
| 4915  | 34,1     | 18,7    | 1,82 | 0,037625 | 0,418 | 235629_at   | Fibronectin 1                                                        | <i>FN1</i>       |
| 1388  | 19,6     | 10,7    | 1,82 | 0,008374 | 0,330 | 211734_s_at | FC fragment of IgE, high affinity I, receptor for; alpha polypeptide | <i>FCER1A</i>    |
| 950   | 123      | 67,7    | 1,82 | 0,005442 | 0,313 | 219572_at   | Ca <sup>2+</sup> -dependent activator protein for secretion 2        | <i>CADPS2</i>    |
| 3300  | 100      | 55,1    | 1,82 | 0,023506 | 0,388 | 228256_s_at | Erythrocyte membrane protein band 4.1 like 4A                        | <i>EPB41L4A</i>  |
| 1726  | 11,3     | 6,23    | 1,82 | 0,011045 | 0,348 | 1566764_at  | Metastasis associated in colon cancer 1                              | <i>MACC1</i>     |
| 917   | 144      | 78,9    | 1,82 | 0,005282 | 0,313 | 227224_at   | Ral GEF with PH domain and SH3 binding motif 2                       | <i>RALGPS2</i>   |
| 175   | 54,7     | 30,1    | 1,82 | 0,000803 | 0,244 | 219771_at   | TBC1 domain family, member 8B (with GRAM domain)                     | <i>TBC1D8B</i>   |
| 499   | 55,8     | 30,7    | 1,82 | 0,002656 | 0,289 | 222075_s_at | Ornithine decarboxylase antizyme 3                                   | <i>OAZ3</i>      |
| 825   | 55,9     | 30,8    | 1,81 | 0,004708 | 0,312 | 222549_at   | Claudin 1                                                            | <i>CLDN1</i>     |
| 1651  | 35,5     | 19,6    | 1,81 | 0,010394 | 0,344 | 232151_at   | Metastasis associated in colon cancer 1                              | <i>MACC1</i>     |
| 5915  | 147      | 81,3    | 1,81 | 0,047945 | 0,443 | 229872_s_at | Hypothetical protein LOC730257                                       | <i>LOC730257</i> |
| 400   | 30,9     | 17,0    | 1,81 | 0,002090 | 0,285 | 233223_at   | Neural precursor cell expressed, developmentally down-regulated 9    | <i>NEDD9</i>     |
| 1708  | 51,8     | 28,7    | 1,81 | 0,010916 | 0,348 | 228950_s_at | G protein-coupled receptor 177                                       | <i>GPR177</i>    |
| 1308  | 68,0     | 37,7    | 1,81 | 0,007787 | 0,325 | 203518_at   | Lysosomal trafficking regulator                                      | <i>LYST</i>      |
| 341   | 140      | 77,3    | 1,80 | 0,001733 | 0,277 | 229943_at   | Tripartite motif-containing 13                                       | <i>TRIM13</i>    |
| 511   | 171      | 94,7    | 1,80 | 0,002714 | 0,290 | 1558080_s_a | DnaJ (Hsp40) homolog, subfamily C, member 3                          | <i>DNAJC3</i>    |
| 291   | 241      | 134     | 1,80 | 0,001423 | 0,263 | 231897_at   | Leukotriene B4 12-hydroxydehydrogenase                               | <i>LTB4DH</i>    |
| 1541  | 44,6     | 24,7    | 1,80 | 0,009536 | 0,337 | 204735_at   | Phosphodiesterase 4A, cAMP-specific                                  | <i>PDE4A</i>     |
| 3117  | 63,0     | 35,0    | 1,80 | 0,022048 | 0,387 | 235733_at   | Transcribed locus                                                    | -                |
| 449   | 49,0     | 27,3    | 1,80 | 0,002394 | 0,288 | 226439_s_at | Neurobeachin                                                         | <i>NBEA</i>      |
| 2159  | 36,1     | 20,1    | 1,80 | 0,014225 | 0,360 | 238455_at   | Plexin domain containing 2                                           | <i>PLXDC2</i>    |
| 4482  | 46,8     | 26,1    | 1,80 | 0,033716 | 0,411 | 201820_at   | Keratin 5                                                            | <i>KRT5</i>      |
| 62    | 31,1     | 17,3    | 1,80 | 0,000228 | 0,201 | 212649_at   | DEAH (Asp-Glu-Ala-His) box polypeptide 29                            | <i>DHX29</i>     |
| 3451  | 6,99     | 3,89    | 1,79 | 0,024701 | 0,391 | 210576_at   | Cytochrome P450, family 4, subfamily F, polypeptide 8                | <i>CYP4F8</i>    |
| 717   | 116      | 64,8    | 1,79 | 0,004116 | 0,308 | 205011_at   | Loss of heterozygosity, 11, chromosomal region 2, gene A             | <i>LOH11CR2A</i> |
| 191   | 67,2     | 37,6    | 1,79 | 0,000891 | 0,244 | 207836_s_at | RNA binding protein with multiple splicing                           | <i>RBPM5</i>     |
| 719   | 33,2     | 18,6    | 1,79 | 0,004119 | 0,308 | 205555_s_at | MSH homeobox 2                                                       | <i>MSX2</i>      |
| 3724  | 40,0     | 22,4    | 1,79 | 0,027028 | 0,397 | 1555407_s_a | FYVE, RhoGEF and PH domain containing 3                              | <i>FGD3</i>      |
| 1216  | 10,0     | 5,62    | 1,79 | 0,007240 | 0,324 | 1556190_s_a | Prion protein (p27-30) (Creutzfeldt-Jakob disease)                   | <i>PRNP</i>      |
| 273   | 49,2     | 27,6    | 1,78 | 0,001310 | 0,262 | 203542_s_at | Kruppel-like factor 9                                                | <i>KLF9</i>      |
| 2055  | 40,5     | 22,7    | 1,78 | 0,013369 | 0,356 | 236114_at   | Runt-related transcription factor 1 (aml1 oncogene)                  | <i>RUNX1</i>     |
| 4358  | 14,1     | 7,90    | 1,78 | 0,032416 | 0,407 | 206091_at   | Matrilin 3                                                           | <i>MATN3</i>     |
| 387   | 147      | 82,4    | 1,78 | 0,002008 | 0,284 | 203120_at   | Tumor protein p53 binding protein, 2                                 | <i>TP53BP2</i>   |
| 700   | 37,5     | 21,1    | 1,78 | 0,004011 | 0,308 | 215536_at   | Major histocompatibility complex, class II, DQ beta 2                | <i>HLA-DQB2</i>  |
| 968   | 20,1     | 11,3    | 1,78 | 0,005615 | 0,315 | 241872_at   | SH3-domain GRB2-like (endophilin) interacting protein 1              | <i>SGIP1</i>     |

| Index | Mutated* | Normal* | FC   | P value  | FDR** | Probe set   | Description                                                         | Gene symbol |
|-------|----------|---------|------|----------|-------|-------------|---------------------------------------------------------------------|-------------|
| 236   | 49,2     | 27,7    | 1,78 | 0,001101 | 0,250 | 209632_at   | Protein phosphatase 2 (formerly 2A), regulatory subunit B", alpha   | PPP2R3A     |
| 1112  | 132      | 74,2    | 1,78 | 0,006509 | 0,319 | 205097_at   | Solute carrier family 26 (sulfate transporter), member 2            | SLC26A2     |
| 1660  | 35,4     | 20,0    | 1,77 | 0,010480 | 0,345 | 206191_at   | Ectonucleoside triphosphate diphosphohydrolase 3                    | ENTPD3      |
| 1278  | 52,6     | 29,7    | 1,77 | 0,007609 | 0,325 | 209655_s_at | Transmembrane protein 47                                            | TMEM47      |
| 2770  | 30,6     | 17,3    | 1,77 | 0,019221 | 0,379 | 1558612_a_a | ATPase, Na+/K+ transporting, alpha 4 polypeptide                    | ATP1A4      |
| 495   | 87,7     | 49,6    | 1,77 | 0,002640 | 0,289 | 230906_at   | N-acetylgalactosaminyltransferase 10                                | GALNT10     |
| 4515  | 49,9     | 28,2    | 1,77 | 0,034036 | 0,412 | 218857_s_at | Asparaginase like 1                                                 | ASRGL1      |
| 4569  | 220      | 125     | 1,77 | 0,034553 | 0,412 | 202464_s_at | 6-phosphofructo-2-kinase/fructose-2,6-biphosphatase 3               | PFKFB3      |
| 4703  | 108      | 60,9    | 1,77 | 0,035548 | 0,413 | 214295_at   | KIAA0485 protein                                                    | KIAA0485    |
| 4151  | 247      | 140     | 1,77 | 0,030628 | 0,403 | 227384_s_at | Hypothetical protein LOC727820                                      | LOC727820   |
| 1011  | 413      | 234     | 1,76 | 0,005857 | 0,316 | 226085_at   | Chromobox homolog 5 (HP1 alpha homolog, Drosophila)                 | CBX5        |
| 5489  | 344      | 195     | 1,76 | 0,043445 | 0,433 | 214329_x_at | Tumor necrosis factor (ligand) superfamily, member 10               | TNFSF10     |
| 5094  | 54,3     | 30,8    | 1,76 | 0,039195 | 0,420 | 229744_at   | Sperm specific antigen 2                                            | SSFA2       |
| 871   | 200      | 113     | 1,76 | 0,005028 | 0,313 | 227740_at   | U2AF homology motif (UHM) kinase 1                                  | UHMK1       |
| 1202  | 5,58     | 3,17    | 1,76 | 0,007111 | 0,323 | 1554027_a_a | Solute carrier family 4, sodium bicarbonate cotransporter, member 4 | SLC4A4      |
| 637   | 124      | 70,1    | 1,76 | 0,003620 | 0,308 | 235003_at   | U2AF homology motif (UHM) kinase 1                                  | UHMK1       |
| 358   | 45,0     | 25,5    | 1,76 | 0,001833 | 0,280 | 222314_x_at | Eosinophil granule ontogeny transcript (non-protein coding)         | EGOT        |
| 896   | 65,7     | 37,3    | 1,76 | 0,005182 | 0,313 | 218451_at   | CUB domain containing protein 1                                     | CDCP1       |
| 270   | 36,4     | 20,7    | 1,76 | 0,001291 | 0,261 | 213462_at   | Neuronal PAS domain protein 2                                       | NPAS2       |
| 1516  | 19,5     | 11,1    | 1,76 | 0,009365 | 0,337 | 243546_at   | Sestrin 3                                                           | SESN3       |
| 566   | 72,1     | 41,1    | 1,75 | 0,003093 | 0,299 | 213342_at   | Yes-associated protein 1, 65kDa                                     | YAP1        |
| 4981  | 35,1     | 20,0    | 1,75 | 0,038216 | 0,419 | 205907_s_at | Osteomodulin                                                        | OMD         |
| 390   | 123      | 70,2    | 1,75 | 0,002025 | 0,284 | 226065_at   | Prickle homolog 1 (Drosophila)                                      | PRICKLE1    |
| 200   | 81,2     | 46,4    | 1,75 | 0,000925 | 0,244 | 222734_at   | Tryptophanyl tRNA synthetase 2, mitochondrial                       | WARS2       |
| 1683  | 22,8     | 13,0    | 1,75 | 0,010637 | 0,345 | 242458_at   | Ral GEF with PH domain and SH3 binding motif 2                      | RALGPS2     |
| 929   | 36,0     | 20,6    | 1,75 | 0,005334 | 0,313 | 207300_s_at | Coagulation factor VII (serum prothrombin conversion accelerator)   | F7          |
| 3019  | 22,2     | 12,7    | 1,75 | 0,021268 | 0,385 | 1564064_a_a | ATPase, Class VI, type 11B                                          | ATP11B      |
| 1538  | 31,6     | 18,1    | 1,75 | 0,009523 | 0,337 | 235592_at   | Elongation factor, RNA polymerase II, 2                             | ELL2        |
| 2     | 635      | 364     | 1,75 | 0,000007 | 0,099 | 211962_s_at | Zinc finger protein 36, C3H type-like 1                             | ZFP36L1     |
| 1433  | 182      | 104     | 1,75 | 0,008691 | 0,331 | 201730_s_at | Translocated promoter region (to activated MET oncogene)            | TPR         |
| 697   | 35,5     | 20,4    | 1,74 | 0,004003 | 0,308 | 214269_at   | Major facilitator superfamily domain containing 7                   | MFSD7       |
| 1636  | 36,5     | 21,0    | 1,74 | 0,010311 | 0,344 | 205729_at   | Oncostatin M receptor                                               | OSMR        |
| 5311  | 64,8     | 37,2    | 1,74 | 0,041436 | 0,426 | 235924_at   | cDNA FLJ42287 fis, clone TLIVE2005866                               | -           |
| 1245  | 371      | 213     | 1,74 | 0,007398 | 0,324 | 1568619_s_a | Hypothetical protein LOC162073                                      | LOC162073   |
| 1605  | 21,7     | 12,5    | 1,74 | 0,010038 | 0,342 | 241837_at   | AT rich interactive domain 5B (MRF1-like)                           | ARID5B      |
| 1807  | 162      | 93,3    | 1,74 | 0,011634 | 0,351 | 234970_at   | Tandem C2 domains, nuclear                                          | TC2N        |
| 2000  | 60,8     | 35,0    | 1,74 | 0,013064 | 0,355 | 232797_at   | Vitronectin receptor subunit alpha (antigen CD51)                   | ITGAV       |
| 5188  | 19,7     | 11,3    | 1,74 | 0,039978 | 0,421 | 206595_at   | Cystatin E/M                                                        | CST6        |
| 2657  | 36,9     | 21,2    | 1,74 | 0,018124 | 0,373 | 229105_at   | G protein-coupled receptor 39                                       | GPR39       |
| 1640  | 77,8     | 45,0    | 1,73 | 0,010338 | 0,344 | 229530_at   | Guanylate cyclase 1, soluble, alpha 3                               | GUCY1A3     |
| 894   | 124      | 72,0    | 1,73 | 0,005167 | 0,313 | 226621_at   | Fibrinogen gamma chain                                              | FGG         |
| 3129  | 72,6     | 42,0    | 1,73 | 0,022184 | 0,387 | 236179_at   | Cadherin 11, type 2, OB-cadherin (osteoblast)                       | CDH11       |
| 2351  | 66,3     | 38,4    | 1,73 | 0,015686 | 0,364 | 229307_at   | Ankyrin repeat domain 28                                            | ANKRD28     |
| 1475  | 24,6     | 14,3    | 1,73 | 0,009014 | 0,334 | 241864_x_at | Transcribed locus                                                   | -           |
| 1653  | 15,2     | 8,80    | 1,72 | 0,010426 | 0,345 | 241310_at   | Transcribed locus                                                   | -           |
| 2025  | 13,9     | 8,07    | 1,72 | 0,013199 | 0,355 | 240120_at   | Sorbin and SH3 domain containing 2                                  | SORBS2      |
| 142   | 225      | 130     | 1,72 | 0,000645 | 0,244 | 218788_s_at | SET and MYND domain containing 3                                    | SMYD3       |
| 479   | 16,4     | 9,54    | 1,72 | 0,002563 | 0,289 | 213109_at   | TRAF2 and NCK interacting kinase                                    | TNIK        |
| 1915  | 1281     | 743     | 1,72 | 0,012500 | 0,355 | 212195_at   | Interleukin 6 signal transducer (gp130, oncostatin M receptor)      | IL6ST       |
| 1965  | 15,7     | 9,10    | 1,72 | 0,012849 | 0,355 | 225660_at   | Semaphorin 6A-1                                                     | SEMA6A      |
| 408   | 154      | 89,2    | 1,72 | 0,002147 | 0,286 | 228824_s_at | Prostaglandin reductase 1                                           | PTGR1       |
| 1826  | 7,45     | 4,33    | 1,72 | 0,011762 | 0,351 | 204913_s_at | SRY (sex determining region Y)-box 11                               | SOX11       |
| 1398  | 63,2     | 36,7    | 1,72 | 0,008450 | 0,330 | 228141_at   | Glutathione peroxidase 8 (putative)                                 | GPX8        |
| 300   | 87,4     | 50,8    | 1,72 | 0,001461 | 0,263 | 207749_s_at | Protein phosphatase 2 (formerly 2A), regulatory subunit B", alpha   | PPP2R3A     |
| 979   | 33,5     | 19,5    | 1,72 | 0,005682 | 0,315 | 235834_at   | Caldesmon 1                                                         | CALD1       |
| 528   | 11,1     | 6,45    | 1,72 | 0,002818 | 0,292 | 221583_s_at | Calcium-activated potassium channel subunit alpha-1                 | KCNMA1      |
| 3025  | 20,1     | 11,7    | 1,72 | 0,021294 | 0,385 | 235957_at   | Glutamate receptor interacting protein 1                            | GRIP1       |

| Index | Mutated* | Normal* | FC   | P value  | FDR** | Probe set   | Description                                                            | Gene symbol       |
|-------|----------|---------|------|----------|-------|-------------|------------------------------------------------------------------------|-------------------|
| 1495  | 19,3     | 11,3    | 1,72 | 0,009209 | 0,336 | 242736_at   | Sorbin and SH3 domain containing 1                                     | <i>SORBS1</i>     |
| 549   | 78,7     | 45,8    | 1,72 | 0,002972 | 0,295 | 214734_at   | Exophilin 5                                                            | <i>EXPH5</i>      |
| 41    | 18,8     | 11,0    | 1,72 | 0,000172 | 0,201 | 228602_at   | Sarcoglycan, delta (35kDa dystrophin-associated glycoprotein)          | <i>SGCD</i>       |
| 488   | 23,7     | 13,8    | 1,72 | 0,002619 | 0,289 | 242931_at   | LON peptidase N-terminal domain and ring finger 3                      | <i>LONRF3</i>     |
| 2585  | 92,2     | 53,8    | 1,71 | 0,017536 | 0,371 | 206994_at   | Cystatin S                                                             | <i>CST4</i>       |
| 231   | 52,2     | 30,5    | 1,71 | 0,001070 | 0,250 | 244533_at   | Protein tyrosine phosphatase, non-receptor type 14                     | <i>PTPN14</i>     |
| 2554  | 68,4     | 40,0    | 1,71 | 0,017283 | 0,370 | 239597_at   | Poly(A) specific ribonuclease subunit homolog ( <i>S. cerevisiae</i> ) | <i>PAN3</i>       |
| 3485  | 55,3     | 32,3    | 1,71 | 0,025017 | 0,392 | 223948_s_at | Transmembrane protease, serine 3                                       | <i>TMPRSS3</i>    |
| 2090  | 23,9     | 14,0    | 1,71 | 0,013626 | 0,356 | 235278_at   | MACRO domain containing 2                                              | <i>MACROD2</i>    |
| 3800  | 76,6     | 44,8    | 1,71 | 0,027683 | 0,398 | 217867_x_at | Beta-site APP-cleaving enzyme 2                                        | <i>BACE2</i>      |
| 2153  | 14,8     | 8,68    | 1,71 | 0,014179 | 0,360 | 230472_at   | Iroquois homeobox 1                                                    | <i>IRX1</i>       |
| 2716  | 68,1     | 39,9    | 1,71 | 0,018663 | 0,376 | 243296_at   | Pre-B-cell colony enhancing factor 1                                   | <i>PBEF1</i>      |
| 3543  | 848      | 497     | 1,71 | 0,025495 | 0,393 | 217762_s_at | RAB31, member RAS oncogene family                                      | <i>RAB31</i>      |
| 3587  | 65,1     | 38,2    | 1,71 | 0,025885 | 0,394 | 204157_s_at | KIAA0999 protein                                                       | <i>KIAA0999</i>   |
| 940   | 49,7     | 29,2    | 1,70 | 0,005379 | 0,313 | 236561_at   | Transforming growth factor, beta receptor I                            | <i>TGFBR1</i>     |
| 1771  | 25,1     | 14,7    | 1,70 | 0,011292 | 0,348 | 213929_at   | Exophilin 5                                                            | <i>EXPH5</i>      |
| 2056  | 170      | 100     | 1,70 | 0,013390 | 0,356 | 227533_at   | Transcribed locus                                                      | -                 |
| 2326  | 65,8     | 38,7    | 1,70 | 0,015473 | 0,364 | 232138_at   | Muscleblind-like 2 ( <i>Drosophila</i> )                               | <i>MBNL2</i>      |
| 1513  | 9,22     | 5,42    | 1,70 | 0,009319 | 0,337 | 220117_at   | Zinc finger protein 659                                                | <i>ZNF659</i>     |
| 4051  | 61,2     | 36,0    | 1,70 | 0,029701 | 0,401 | 241897_at   | RNA binding protein with multiple splicing                             | <i>RBPM5</i>      |
| 4115  | 299      | 176     | 1,70 | 0,030261 | 0,402 | 228993_s_at | Non-protein coding RNA 81                                              | <i>NCRNA00081</i> |
| 6074  | 7,90     | 4,65    | 1,70 | 0,049585 | 0,446 | 231626_at   | Tryptophan hydroxylase 1                                               | <i>TPH1</i>       |
| 3370  | 128      | 75,4    | 1,70 | 0,023966 | 0,389 | 227232_at   | Enah/Vasp-like                                                         | <i>EVL</i>        |
| 5709  | 249      | 147     | 1,70 | 0,045713 | 0,438 | 202506_at   | Sperm specific antigen 2                                               | <i>SSFA2</i>      |
| 624   | 108      | 63,7    | 1,70 | 0,003541 | 0,308 | 202962_at   | Kinesin family member 13B                                              | <i>KIF13B</i>     |
| 851   | 59,2     | 34,9    | 1,69 | 0,004897 | 0,313 | 242281_at   | Glutamate-ammonia ligase (glutamine synthetase)                        | <i>GLUL</i>       |
| 4994  | 15,4     | 9,09    | 1,69 | 0,038316 | 0,419 | 205908_s_at | Osteomodulin                                                           | <i>OMD</i>        |
| 198   | 14,2     | 8,38    | 1,69 | 0,000917 | 0,244 | 233286_at   | PDZ domain containing ring finger 3                                    | <i>PDZRN3</i>     |
| 904   | 82,7     | 48,9    | 1,69 | 0,005233 | 0,313 | 204948_s_at | Follistatin                                                            | <i>FST</i>        |
| 1075  | 90,7     | 53,7    | 1,69 | 0,006305 | 0,319 | 201369_s_at | Zinc finger protein 36, C3H type-like 2                                | <i>ZFP36L2</i>    |
| 1741  | 27,2     | 16,1    | 1,69 | 0,011126 | 0,348 | 232112_at   | Ral GEF with PH domain and SH3 binding motif 2                         | <i>RALGPS2</i>    |
| 1509  | 308      | 183     | 1,69 | 0,009303 | 0,337 | 202820_at   | Aryl hydrocarbon receptor                                              | <i>AHR</i>        |
| 1052  | 322      | 191     | 1,69 | 0,006147 | 0,319 | 218694_at   | Armadillo repeat containing, X-linked 1                                | <i>ARMCX1</i>     |
| 3488  | 85,4     | 50,6    | 1,69 | 0,025069 | 0,392 | 227997_at   | Interleukin 17 receptor D                                              | <i>IL17RD</i>     |
| 2408  | 7,59     | 4,50    | 1,69 | 0,016095 | 0,365 | 220014_at   | Proline rich 16                                                        | <i>PRR16</i>      |
| 388   | 27,0     | 16,0    | 1,69 | 0,002012 | 0,284 | 214366_s_at | Arachidonate 5-lipoxygenase                                            | <i>ALOX5</i>      |
| 2306  | 669      | 397     | 1,69 | 0,015300 | 0,363 | 1555812_a_a | Rho GDP dissociation inhibitor (GDI) beta                              | <i>ARHGDI2</i>    |
| 2407  | 156      | 92,5    | 1,69 | 0,016084 | 0,365 | 241879_at   | Transcribed locus                                                      | -                 |
| 3050  | 86,1     | 51,1    | 1,68 | 0,021466 | 0,385 | 223349_s_at | BCL2-related ovarian killer                                            | <i>BOK</i>        |
| 313   | 51,8     | 30,8    | 1,68 | 0,001577 | 0,272 | 213826_s_at | H3 histone, family 3A                                                  | <i>H3F3A</i>      |
| 3936  | 79,2     | 47,1    | 1,68 | 0,028758 | 0,399 | 203642_s_at | COBL-like 1                                                            | <i>COBL1</i>      |
| 792   | 19,8     | 11,7    | 1,68 | 0,004531 | 0,311 | 239726_at   | Ankyrin 3, node of Ranvier (ankyrin G)                                 | <i>ANK3</i>       |
| 69    | 85,7     | 50,9    | 1,68 | 0,000266 | 0,201 | 221503_s_at | Karyopherin alpha 3 (importin alpha 4)                                 | <i>KPNA3</i>      |
| 3832  | 27,0     | 16,1    | 1,68 | 0,028005 | 0,399 | 220266_s_at | Kruppel-like factor 4 (gut)                                            | <i>KLF4</i>       |
| 1100  | 42,7     | 25,4    | 1,68 | 0,006453 | 0,319 | 209442_x_at | Ankyrin 3, node of Ranvier (ankyrin G)                                 | <i>ANK3</i>       |
| 287   | 10,3     | 6,13    | 1,68 | 0,001403 | 0,263 | 224463_s_at | Chromosome 11 open reading frame 70                                    | <i>C11orf70</i>   |
| 723   | 267      | 159     | 1,68 | 0,004143 | 0,308 | 224894_at   | Yes-associated protein 1, 65kDa                                        | <i>YAP1</i>       |
| 1675  | 89,5     | 53,4    | 1,68 | 0,010563 | 0,345 | 205107_s_at | Ephrin-A4                                                              | <i>EFNA4</i>      |
| 147   | 18,0     | 10,8    | 1,68 | 0,000677 | 0,244 | 1557242_at  | Similar to Fibroblast growth factor receptor 3 precursor (FGFR-3)      | <i>LOC442200</i>  |
| 514   | 35,0     | 21,0    | 1,67 | 0,002747 | 0,291 | 220272_at   | Basonuclin 2                                                           | <i>BNC2</i>       |
| 1795  | 14,2     | 8,52    | 1,67 | 0,011533 | 0,351 | 215047_at   | Tripartite motif-containing 58                                         | <i>TRIM58</i>     |
| 2624  | 523      | 314     | 1,67 | 0,017825 | 0,371 | 206116_s_at | Tropomyosin 1 (alpha)                                                  | <i>TPM1</i>       |
| 3012  | 302      | 181     | 1,67 | 0,021190 | 0,385 | 225496_s_at | Synaptotagmin-like 2                                                   | <i>SYTL2</i>      |
| 2856  | 368      | 221     | 1,67 | 0,020049 | 0,383 | 226534_at   | KIT ligand                                                             | <i>KITLG</i>      |
| 3004  | 720      | 432     | 1,67 | 0,021137 | 0,385 | 217202_s_at | Glutamate-ammonia ligase (glutamine synthetase)                        | <i>GLUL</i>       |
| 4456  | 40,4     | 24,3    | 1,67 | 0,033478 | 0,411 | 209167_at   | Glycoprotein M6B                                                       | <i>GPM6B</i>      |
| 2517  | 13,6     | 8,20    | 1,66 | 0,016975 | 0,369 | 230970_at   | Slingshot homolog 2 ( <i>Drosophila</i> )                              | <i>SSH2</i>       |



| Index | Mutated* | Normal* | FC   | P value  | FDR** | Probe set   | Description                                                            | Gene symbol     |
|-------|----------|---------|------|----------|-------|-------------|------------------------------------------------------------------------|-----------------|
| 5930  | 41,1     | 24,7    | 1,66 | 0,048060 | 0,443 | 229125_at   | Ankyrin repeat domain 38                                               | <i>ANKRD38</i>  |
| 2552  | 135      | 81,1    | 1,66 | 0,017275 | 0,370 | 236251_at   | Vitronectin receptor subunit alpha (antigen CD51)                      | <i>ITGAV</i>    |
| 3330  | 43,5     | 26,2    | 1,66 | 0,023639 | 0,388 | 203641_s_at | COBL-like 1                                                            | <i>COBLL1</i>   |
| 3626  | 40,4     | 24,3    | 1,66 | 0,026198 | 0,395 | 226069_at   | Prickle homolog 1 (Drosophila)                                         | <i>PRICKLE1</i> |
| 1720  | 17,3     | 10,4    | 1,66 | 0,011019 | 0,348 | 236237_at   | KIAA1370 protein                                                       | <i>KIAA1370</i> |
| 916   | 26,9     | 16,2    | 1,66 | 0,005275 | 0,313 | 222735_at   | Transmembrane protein 38B                                              | <i>TMEM38B</i>  |
| 5056  | 160      | 96,2    | 1,66 | 0,038950 | 0,420 | 202990_at   | Phosphorylase, glycogen                                                | <i>PYGL</i>     |
| 4610  | 334      | 201     | 1,66 | 0,034821 | 0,412 | 212560_at   | Sortilin-related receptor, L(DLR class) A repeats-containing           | <i>SORL1</i>    |
| 1623  | 47,7     | 28,8    | 1,66 | 0,010197 | 0,344 | 221207_s_at | Neurobeachin                                                           | <i>NBEA</i>     |
| 352   | 17,8     | 10,8    | 1,66 | 0,001793 | 0,278 | 242321_at   | cDNA clone ZE03F06                                                     | -               |
| 427   | 106      | 63,7    | 1,66 | 0,002256 | 0,288 | 222158_s_at | PPPDE peptidase domain containing 1                                    | <i>PPPDE1</i>   |
| 571   | 22,1     | 13,4    | 1,66 | 0,003140 | 0,300 | 244571_s_at | Tetratricopeptide repeat domain 12                                     | <i>TTC12</i>    |
| 1783  | 67,5     | 40,8    | 1,66 | 0,011373 | 0,349 | 232369_at   | Muscleblind-like 2 (Drosophila)                                        | <i>MBNL2</i>    |
| 769   | 247      | 149     | 1,65 | 0,004380 | 0,311 | 201911_s_at | FERM, RhoGEF (ARHGEF) and pleckstrin domain protein 1                  | <i>FARP1</i>    |
| 1810  | 17,0     | 10,3    | 1,65 | 0,011676 | 0,351 | 206556_at   | Clusterin-like 1 (retinal)                                             | <i>CLUL1</i>    |
| 160   | 37,3     | 22,6    | 1,65 | 0,000722 | 0,244 | 217875_s_at | Transmembrane, prostate androgen induced RNA                           | <i>TMEPAI</i>   |
| 4882  | 18,1     | 10,9    | 1,65 | 0,037333 | 0,418 | 233231_at   | Methylcrotonoyl-Coenzyme A carboxylase 2 (beta)                        | <i>MCCC2</i>    |
| 6022  | 315      | 191     | 1,65 | 0,049010 | 0,445 | 226279_at   | Protease, serine, 23                                                   | <i>PRSS23</i>   |
| 5608  | 12,0     | 7,29    | 1,65 | 0,044721 | 0,436 | 243722_at   | PYD (pyrin domain) containing 1                                        | <i>PYDC1</i>    |
| 558   | 95,9     | 58,2    | 1,65 | 0,003025 | 0,296 | 226252_at   | cDNA FLJ34585 fis, clone KIDNE2008758                                  | -               |
| 5168  | 18,2     | 11,1    | 1,65 | 0,039820 | 0,421 | 208006_at   | Forkhead box I1                                                        | <i>FOXI1</i>    |
| 4305  | 11,9     | 7,22    | 1,65 | 0,032037 | 0,407 | 215506_s_at | DIRAS family, GTP-binding RAS-like 3                                   | <i>DIRAS3</i>   |
| 543   | 7,96     | 4,83    | 1,65 | 0,002920 | 0,294 | 226933_s_at | Inhibitor of DNA binding 4, dominant negative helix-loop-helix protein | <i>ID4</i>      |
| 2125  | 33,1     | 20,1    | 1,65 | 0,013990 | 0,359 | 243598_at   | Glycerol-3-phosphate dehydrogenase 2 (mitochondrial)                   | <i>GPD2</i>     |
| 1798  | 60,3     | 36,7    | 1,65 | 0,011576 | 0,351 | 238465_at   | Chromosome 5 open reading frame 35                                     | <i>C5orf35</i>  |
| 539   | 53,9     | 32,8    | 1,64 | 0,002895 | 0,293 | 223530_at   | Tudor and KH domain containing                                         | <i>TDRKH</i>    |
| 1961  | 49,3     | 30,0    | 1,64 | 0,012816 | 0,355 | 201983_s_at | Avian erythroblastic leukemia viral (v-erb-b) oncogene homolog         | <i>EGFR</i>     |
| 207   | 464      | 283     | 1,64 | 0,000954 | 0,244 | 212294_at   | Guanine nucleotide binding protein (G protein), gamma 12               | <i>GNG12</i>    |
| 2263  | 85,4     | 52,0    | 1,64 | 0,015052 | 0,363 | 204036_at   | Lysophosphatidic acid receptor 1                                       | <i>EDG2</i>     |
| 1017  | 174      | 106     | 1,64 | 0,005886 | 0,316 | 213158_at   | cDNA clone IMAGE:4214654                                               | -               |
| 1242  | 13,5     | 8,25    | 1,64 | 0,007382 | 0,324 | 218772_x_at | Transmembrane protein 38B                                              | <i>TMEM38B</i>  |
| 3350  | 84,8     | 51,7    | 1,64 | 0,023787 | 0,388 | 212236_x_at | Keratin 17                                                             | <i>KRT17</i>    |
| 1546  | 750      | 458     | 1,64 | 0,009548 | 0,337 | 210139_s_at | Peripheral myelin protein 22                                           | <i>PMP22</i>    |
| 2437  | 14,3     | 8,75    | 1,64 | 0,016289 | 0,365 | 204914_s_at | SRY (sex determining region Y)-box 11                                  | <i>SOX11</i>    |
| 4191  | 33,1     | 20,2    | 1,64 | 0,030965 | 0,404 | 226676_at   | Zinc finger protein 521                                                | <i>ZNF521</i>   |
| 3909  | 96,6     | 59,1    | 1,64 | 0,028531 | 0,399 | 202932_at   | v-yes-1 Yamaguchi sarcoma viral oncogene homolog 1                     | <i>YES1</i>     |
| 4056  | 50,9     | 31,1    | 1,63 | 0,029751 | 0,401 | 238478_at   | Basonuclin 2                                                           | <i>BNC2</i>     |
| 3396  | 11,0     | 6,76    | 1,63 | 0,024222 | 0,390 | 220475_at   | Solute carrier family 28 member 3                                      | <i>SLC28A3</i>  |
| 1727  | 29,9     | 18,3    | 1,63 | 0,011046 | 0,348 | 230730_at   | Sarcoglycan, delta (35kDa dystrophin-associated glycoprotein)          | <i>SGCD</i>     |
| 498   | 5,79     | 3,54    | 1,63 | 0,002651 | 0,289 | 237134_at   | Transcribed locus                                                      | -               |
| 1194  | 18,6     | 11,4    | 1,63 | 0,007041 | 0,322 | 203930_s_at | Microtubule-associated protein tau                                     | <i>MAPT</i>     |
| 4495  | 81,3     | 49,8    | 1,63 | 0,033807 | 0,411 | 213135_at   | T-cell lymphoma invasion and metastasis 1                              | <i>TIAM1</i>    |
| 1473  | 10,4     | 6,39    | 1,63 | 0,008999 | 0,334 | 241762_at   | F-box protein 32                                                       | <i>FBXO32</i>   |
| 242   | 9,93     | 6,09    | 1,63 | 0,001111 | 0,250 | 232116_at   | Grainyhead-like 3 (Drosophila)                                         | <i>GRHL3</i>    |
| 4067  | 53,6     | 32,9    | 1,63 | 0,029824 | 0,401 | 230722_at   | Basonuclin 2                                                           | <i>BNC2</i>     |
| 5604  | 93,4     | 57,3    | 1,63 | 0,044711 | 0,436 | 211368_s_at | Caspase 1, apoptosis-related cysteine peptidase                        | <i>CASP1</i>    |
| 3349  | 81,3     | 49,9    | 1,63 | 0,023785 | 0,388 | 230712_at   | Neuroblastoma breakpoint family, member 1                              | <i>NBPF1</i>    |
| 2503  | 13,1     | 8,04    | 1,63 | 0,016843 | 0,367 | 209863_s_at | Tumor protein p63                                                      | <i>TP63</i>     |
| 1842  | 14,5     | 8,87    | 1,63 | 0,011844 | 0,351 | 214321_at   | Nephroblastoma overexpressed gene                                      | <i>NOV</i>      |
| 2879  | 180      | 111     | 1,63 | 0,020209 | 0,383 | 209030_s_at | Cell adhesion molecule 1                                               | <i>CADM1</i>    |
| 3054  | 137      | 83,8    | 1,63 | 0,021510 | 0,385 | 222446_s_at | Beta-site APP-cleaving enzyme 2                                        | <i>BACE2</i>    |
| 959   | 30,0     | 18,4    | 1,63 | 0,005539 | 0,315 | 241359_at   | cDNA FLJ20031 fis, clone ADSU02180                                     | -               |
| 4483  | 44,4     | 27,3    | 1,63 | 0,033718 | 0,411 | 202672_s_at | Activating transcription factor 3                                      | <i>ATF3</i>     |
| 1046  | 461      | 283     | 1,63 | 0,006113 | 0,319 | 227856_at   | Chromosome 4 open reading frame 32                                     | <i>C4orf32</i>  |
| 2988  | 11,7     | 7,19    | 1,63 | 0,021007 | 0,384 | 202859_x_at | Interleukin 8                                                          | <i>IL8</i>      |
| 448   | 716      | 440     | 1,63 | 0,002392 | 0,288 | 201368_at   | Zinc finger protein 36, C3H type-like 2                                | <i>ZFP36L2</i>  |
| 278   | 164      | 101     | 1,63 | 0,001357 | 0,263 | 226282_at   | cDNA clone ZE03F06                                                     | -               |

| Index | Mutated* | Normal* | FC   | P value  | FDR** | Probe set   | Description                                                         | Gene symbol      |
|-------|----------|---------|------|----------|-------|-------------|---------------------------------------------------------------------|------------------|
| 640   | 54,8     | 33,7    | 1,63 | 0,003639 | 0,308 | 202191_s_at | Growth arrest-specific 7                                            | <i>GAS7</i>      |
| 1394  | 1346     | 827     | 1,63 | 0,008433 | 0,330 | 208683_at   | Calpain 2, (m/II) large subunit                                     | <i>CAPN2</i>     |
| 1754  | 388      | 239     | 1,63 | 0,011177 | 0,348 | 203509_at   | Sortilin-related receptor, L(DLR class) A repeats-containing        | <i>SORL1</i>     |
| 75    | 116      | 71,2    | 1,63 | 0,000291 | 0,201 | 219625_s_at | Collagen, type IV, alpha 3 (Goodpasture antigen) binding protein    | <i>COL4A3BP</i>  |
| 57    | 21,5     | 13,2    | 1,63 | 0,000216 | 0,201 | 214212_x_at | Pleckstrin homology domain containing, family C member 1            | <i>PLEKHC1</i>   |
| 4292  | 560      | 345     | 1,62 | 0,031900 | 0,406 | 227404_s_at | Early growth response 1                                             | <i>EGR1</i>      |
| 3754  | 132      | 81,4    | 1,62 | 0,027290 | 0,397 | 227628_at   | Glutathione peroxidase 8 (putative)                                 | <i>GPX8</i>      |
| 1577  | 41,5     | 25,5    | 1,62 | 0,009798 | 0,340 | 203543_s_at | Kruppel-like factor 9                                               | <i>KLF9</i>      |
| 1517  | 97,6     | 60,2    | 1,62 | 0,009366 | 0,337 | 212382_at   | Transcription factor 4                                              | <i>TCF4</i>      |
| 3851  | 130      | 80,6    | 1,62 | 0,028109 | 0,399 | 239246_at   | FERM, RhoGEF (ARHGEF) and pleckstrin domain protein 1               | <i>FARP1</i>     |
| 3194  | 98,0     | 60,6    | 1,62 | 0,022634 | 0,387 | 242343_x_at | Zinc finger protein 518A                                            | <i>ZNF518</i>    |
| 1032  | 11,1     | 6,89    | 1,62 | 0,005999 | 0,318 | 222320_at   | Hyperparathyroidism 2 protein                                       | <i>CDC73</i>     |
| 5328  | 6,75     | 4,17    | 1,62 | 0,041669 | 0,428 | 235831_at   | Transcribed locus                                                   | -                |
| 1109  | 27,1     | 16,8    | 1,62 | 0,006492 | 0,319 | 238909_at   | S100 calcium binding protein A10                                    | <i>S100A10</i>   |
| 319   | 118      | 73,2    | 1,62 | 0,001596 | 0,272 | 214724_at   | DIX domain containing 1                                             | <i>DIXDC1</i>    |
| 5542  | 130      | 80,3    | 1,62 | 0,044061 | 0,435 | 209031_at   | Cell adhesion molecule 1                                            | <i>CADM1</i>     |
| 6046  | 190      | 118     | 1,62 | 0,049264 | 0,445 | 213350_at   | Ribosomal protein S11                                               | <i>RPS11</i>     |
| 480   | 62,5     | 38,7    | 1,61 | 0,002568 | 0,289 | 221042_s_at | Calmin (calponin-like, transmembrane)                               | <i>CLMN</i>      |
| 3160  | 14,2     | 8,82    | 1,61 | 0,022427 | 0,387 | 242396_at   | Hypothetical protein LOC644192                                      | <i>LOC644192</i> |
| 4465  | 458      | 284     | 1,61 | 0,033537 | 0,411 | 232914_s_at | Synaptotagmin-like 2                                                | <i>SYTL2</i>     |
| 4748  | 48,0     | 29,7    | 1,61 | 0,035988 | 0,414 | 213790_at   | ADAM metallopeptidase domain 12                                     | <i>ADAM12</i>    |
| 3516  | 178      | 110     | 1,61 | 0,025248 | 0,392 | 235501_at   | FERM, RhoGEF (ARHGEF) and pleckstrin domain protein 1               | <i>FARP1</i>     |
| 5609  | 26,4     | 16,4    | 1,61 | 0,044732 | 0,436 | 215483_at   | A kinase (PRKA) anchor protein (yotiao) 9                           | <i>AKAP9</i>     |
| 288   | 72,6     | 45,0    | 1,61 | 0,001412 | 0,263 | 225041_at   | M-phase phosphoprotein, mpp8                                        | <i>HSMPP8</i>    |
| 4729  | 18,0     | 11,2    | 1,61 | 0,035816 | 0,414 | 233109_at   | Collagen, type XII, alpha 1                                         | <i>COL12A1</i>   |
| 5028  | 296      | 184     | 1,61 | 0,038663 | 0,420 | 218806_s_at | Vav 3 guanine nucleotide exchange factor                            | <i>VAV3</i>      |
| 2581  | 70,6     | 43,9    | 1,61 | 0,017505 | 0,371 | 213156_at   | cDNA clone IMAGE:4214654                                            | -                |
| 3269  | 23,9     | 14,9    | 1,61 | 0,023248 | 0,388 | 212177_at   | Splicing factor, arginine/serine-rich 18                            | <i>SFRS18</i>    |
| 4322  | 36,4     | 22,6    | 1,61 | 0,032177 | 0,407 | 236225_at   | Gamma-glutamyltransferase 6 homolog (rat)                           | <i>GGT6</i>      |
| 181   | 1203     | 748     | 1,61 | 0,000838 | 0,244 | 208949_s_at | Lectin, galactoside-binding, soluble, 3                             | <i>LGALS3</i>    |
| 5636  | 129      | 80,0    | 1,61 | 0,044981 | 0,436 | 214927_at   | Integrin, beta-like 1 (with EGF-like repeat domains)                | <i>ITGBL1</i>    |
| 1896  | 229      | 143     | 1,61 | 0,012326 | 0,355 | 228188_at   | FOS-like antigen 2                                                  | <i>FOSL2</i>     |
| 3270  | 53,1     | 33,1    | 1,61 | 0,023250 | 0,388 | 220940_at   | KIAA1641 protein                                                    | <i>KIAA1641</i>  |
| 5432  | 117      | 72,8    | 1,60 | 0,042790 | 0,431 | 209656_s_at | Transmembrane protein 47                                            | <i>TMEM47</i>    |
| 5826  | 80,2     | 50,0    | 1,60 | 0,047075 | 0,442 | 229704_at   | Androgen-induced proliferation inhibitor                            | <i>PDS5B</i>     |
| 691   | 10,4     | 6,48    | 1,60 | 0,003971 | 0,308 | 238067_at   | TBC1 domain family, member 8B (with GRAM domain)                    | <i>TBC1D8B</i>   |
| 3406  | 140      | 87,0    | 1,60 | 0,024301 | 0,390 | 221824_s_at | Membrane-associated ring finger (C3HC4) 8                           | <i>MARCH8</i>    |
| 520   | 121      | 75,8    | 1,60 | 0,002767 | 0,291 | 209633_at   | Protein phosphatase 2 (formerly 2A), regulatory subunit B'', alpha  | <i>PPP2R3A</i>   |
| 103   | 28,7     | 17,9    | 1,60 | 0,000413 | 0,217 | 230518_at   | Myelin protein zero-like 2                                          | <i>MPZL2</i>     |
| 214   | 273      | 170     | 1,60 | 0,000961 | 0,244 | 219221_at   | Zinc finger and BTB domain containing 38                            | <i>ZBTB38</i>    |
| 2322  | 127      | 79,2    | 1,60 | 0,015439 | 0,364 | 222746_s_at | B-box and SPRY domain containing                                    | <i>BSPRY</i>     |
| 584   | 187      | 117     | 1,60 | 0,003220 | 0,301 | 206061_s_at | Dicer1, Dcr-1 homolog (Drosophila)                                  | <i>DICER1</i>    |
| 2119  | 24,9     | 15,6    | 1,60 | 0,013906 | 0,359 | 237456_at   | RING1 and YY1 binding protein                                       | <i>RYBP</i>      |
| 395   | 35,6     | 22,3    | 1,60 | 0,002084 | 0,285 | 219469_at   | Dynein, cytoplasmic 2, heavy chain 1                                | <i>DYNC2H1</i>   |
| 4428  | 28,1     | 17,6    | 1,60 | 0,033159 | 0,409 | 239587_at   | Transcribed locus                                                   | -                |
| 5232  | 184      | 115     | 1,60 | 0,040493 | 0,423 | 200824_at   | Glutathione S-transferase pi                                        | <i>GSTP1</i>     |
| 4845  | 23,5     | 14,8    | 1,59 | 0,036920 | 0,417 | 236587_at   | Transcribed locus                                                   | -                |
| 971   | 547      | 343     | 1,59 | 0,005626 | 0,315 | 212386_at   | Transcription factor 4                                              | <i>TCF4</i>      |
| 1702  | 159      | 100,0   | 1,59 | 0,010844 | 0,348 | 226117_at   | TRAF-interacting protein with a forkhead-associated domain          | <i>TIFA</i>      |
| 1881  | 10,9     | 6,88    | 1,59 | 0,012201 | 0,355 | 210739_x_at | Solute carrier family 4, sodium bicarbonate cotransporter, member 4 | <i>SLC4A4</i>    |
| 1464  | 114      | 71,4    | 1,59 | 0,008959 | 0,334 | 229499_at   | Calpain 13                                                          | <i>CAPN13</i>    |
| 5622  | 504      | 317     | 1,59 | 0,044890 | 0,436 | 228708_at   | RAB27B, member RAS oncogene family                                  | <i>RAB27B</i>    |
| 529   | 33,9     | 21,3    | 1,59 | 0,002827 | 0,292 | 213239_at   | Family with sequence similarity 162, member A                       | <i>FAM162A</i>   |
| 2654  | 94,3     | 59,3    | 1,59 | 0,018094 | 0,373 | 212233_at   | Microtubule-associated protein 1B                                   | <i>MAP1B</i>     |
| 5716  | 32,4     | 20,4    | 1,59 | 0,045772 | 0,438 | 206271_at   | Toll-like receptor 3                                                | <i>TLR3</i>      |
| 3487  | 53,9     | 33,9    | 1,59 | 0,025032 | 0,392 | 220751_s_at | Chromosome 5 open reading frame 4                                   | <i>C5orf4</i>    |
| 279   | 972      | 612     | 1,59 | 0,001364 | 0,263 | 210835_s_at | C-terminal binding protein 2                                        | <i>CTBP2</i>     |

| Index | Mutated* | Normal* | FC   | P value  | FDR** | Probe set   | Description                                                     | Gene symbol |
|-------|----------|---------|------|----------|-------|-------------|-----------------------------------------------------------------|-------------|
| 3688  | 152      | 95,6    | 1,59 | 0,026634 | 0,395 | 202933_s_at | v-yes-1 Yamaguchi sarcoma viral oncogene homolog 1              | YES1        |
| 4949  | 100      | 63,3    | 1,59 | 0,037968 | 0,419 | 226225_at   | Mutated in colorectal cancers                                   | MCC         |
| 1397  | 175      | 111     | 1,59 | 0,008437 | 0,330 | 218792_s_at | B-box and SPRY domain containing                                | BSPRY       |
| 1914  | 169      | 107     | 1,59 | 0,012472 | 0,355 | 221942_s_at | Guanylate cyclase 1, soluble, alpha 3                           | GUCY1A3     |
| 3777  | 44,8     | 28,2    | 1,59 | 0,027458 | 0,397 | 218273_s_at | Protein phosphatase 2C, magnesium-dependent, catalytic subunit  | PPM2C       |
| 567   | 51,8     | 32,6    | 1,59 | 0,003099 | 0,299 | 241233_x_at | Chromosome 21 open reading frame 81                             | C21orf81    |
| 4540  | 26,3     | 16,6    | 1,59 | 0,034300 | 0,412 | 210538_s_at | Baculoviral IAP repeat-containing 3                             | BIRC3       |
| 1851  | 10,3     | 6,49    | 1,59 | 0,011917 | 0,352 | 233819_s_at | Zinc finger protein 294                                         | ZNF294      |
| 149   | 48,4     | 30,6    | 1,58 | 0,000689 | 0,244 | 1554106_at  | Neurobeachin-like 1                                             | ALS2CR16    |
| 5389  | 47,6     | 30,0    | 1,58 | 0,042253 | 0,429 | 242920_at   | SIK family kinase 3                                             | SIK3        |
| 1205  | 53,7     | 33,9    | 1,58 | 0,007132 | 0,324 | 214149_s_at | ATPase, H+ transporting, lysosomal 9kDa, V0 subunit e1          | ATP6VOE1    |
| 368   | 22,8     | 14,4    | 1,58 | 0,001918 | 0,284 | 230071_at   | Septin 11                                                       | SEPT11      |
| 80    | 11,4     | 7,21    | 1,58 | 0,000301 | 0,201 | 231149_s_at | Unc-51-like kinase 4 (C. elegans)                               | ULK4        |
| 961   | 232      | 147     | 1,58 | 0,005559 | 0,315 | 224895_at   | Yes-associated protein 1, 65kDa                                 | YAP1        |
| 3087  | 489      | 309     | 1,58 | 0,021766 | 0,385 | 202336_s_at | Peptidylglycine alpha-amidating monooxygenase                   | PAM         |
| 2616  | 9,71     | 6,14    | 1,58 | 0,017773 | 0,371 | 206548_at   | Hypothetical protein FLJ23556                                   | FKJ23556    |
| 426   | 70,3     | 44,4    | 1,58 | 0,002253 | 0,288 | 233540_s_at | CDK5 regulatory subunit associated protein 2                    | CDK5RAP2    |
| 1493  | 66,3     | 41,9    | 1,58 | 0,009199 | 0,336 | 222834_s_at | Guanine nucleotide binding protein (G protein), gamma 12        | GNG12       |
| 2438  | 300      | 189     | 1,58 | 0,016292 | 0,365 | 228153_at   | Ring finger 144B                                                | RNF144B     |
| 3034  | 28,8     | 18,2    | 1,58 | 0,021381 | 0,385 | 209318_x_at | Pleiomorphic adenoma gene-like 1                                | PLAGL1      |
| 5283  | 85,1     | 53,8    | 1,58 | 0,041092 | 0,425 | 225806_at   | Jub, ajuba homolog (Xenopus laevis)                             | JUB         |
| 2570  | 10,7     | 6,78    | 1,58 | 0,017428 | 0,371 | 215686_x_at | Transcription factor AP-2 beta                                  | TFAP2B      |
| 2936  | 20,4     | 12,9    | 1,58 | 0,020591 | 0,383 | 240146_at   | Capping protein (actin filament) muscle Z-line, alpha 2         | CAPZA2      |
| 4946  | 38,9     | 24,6    | 1,58 | 0,037943 | 0,419 | 244246_at   | Mirror-image polydactyly 1                                      | MIPOL1      |
| 3365  | 69,1     | 43,7    | 1,58 | 0,023903 | 0,388 | 237064_x_at | Dynein, axonemal, heavy chain 14                                | DNAH14      |
| 2219  | 849      | 537     | 1,58 | 0,014710 | 0,362 | 227792_at   | Inositol 1,4,5-triphosphate receptor interacting protein-like 2 | ITPRIPL2    |
| 754   | 149      | 94,1    | 1,58 | 0,004270 | 0,308 | 212256_at   | N-acetylgalactosaminyltransferase 10                            | GALNT10     |
| 1020  | 71,2     | 45,1    | 1,58 | 0,005898 | 0,316 | 241722_x_at | Transcribed locus                                               | -           |
| 370   | 88,4     | 56,0    | 1,58 | 0,001941 | 0,284 | 225957_at   | Adult retina protein                                            | LOC153222   |
| 962   | 253      | 160     | 1,58 | 0,005570 | 0,315 | 204373_s_at | Centrosomal protein 350kDa                                      | CEP350      |
| 4808  | 30,2     | 19,1    | 1,58 | 0,036508 | 0,415 | 222528_s_at | Solute carrier family 25, member 37                             | SLC25A37    |
| 4102  | 30,7     | 19,5    | 1,58 | 0,030147 | 0,402 | 229817_at   | Zinc finger protein 608                                         | ZNF608      |
| 1710  | 27,6     | 17,5    | 1,58 | 0,010940 | 0,348 | 239393_at   | Poly(A) specific ribonuclease subunit homolog (S. cerevisiae)   | PAN3        |
| 2784  | 10,3     | 6,50    | 1,58 | 0,019340 | 0,380 | 1552405_at  | NLR family, pyrin domain containing 5                           | NLRP5       |
| 1835  | 29,5     | 18,7    | 1,58 | 0,011814 | 0,351 | 239619_at   | Zinc finger protein 395                                         | ZNF395      |
| 2590  | 16,7     | 10,6    | 1,58 | 0,017573 | 0,371 | 218610_s_at | Hypothetical protein FLJ11151                                   | FLJ11151    |
| 2114  | 49,8     | 31,6    | 1,58 | 0,013870 | 0,359 | 221276_s_at | Syncoilin, intermediate filament 1                              | SYNC1       |
| 2447  | 10,5     | 6,66    | 1,58 | 0,016391 | 0,366 | 202036_s_at | Secreted frizzled-related protein 1                             | SFRP1       |
| 3707  | 28,7     | 18,2    | 1,57 | 0,026801 | 0,395 | 236297_at   | cDNA FLJ45742 fis, clone KIDNE2016327                           | -           |
| 4440  | 8,42     | 5,35    | 1,57 | 0,033335 | 0,410 | 202235_at   | Solute carrier family 16, member 1                              | SLC16A1     |
| 2324  | 57,4     | 36,5    | 1,57 | 0,015461 | 0,364 | 233924_s_at | Exocyst complex component 6                                     | EXOC6       |
| 1733  | 75,6     | 48,0    | 1,57 | 0,011083 | 0,348 | 215338_s_at | Natural killer-tumor recognition sequence                       | NKTR        |
| 2631  | 32,4     | 20,6    | 1,57 | 0,017907 | 0,372 | 243395_at   | CD55 molecule, decay accelerating factor for complement         | CD55        |
| 5002  | 27,9     | 17,7    | 1,57 | 0,038404 | 0,420 | 244075_at   | Hydroxysteroid (17-beta) dehydrogenase 7 pseudogene 2           | HSD17B7P2   |
| 1673  | 16,5     | 10,5    | 1,57 | 0,010558 | 0,345 | 243233_at   | Poly(A) specific ribonuclease subunit homolog (S. cerevisiae)   | PAN3        |
| 4275  | 87,0     | 55,3    | 1,57 | 0,031776 | 0,406 | 218344_s_at | REST corepressor 3                                              | RCOR3       |
| 565   | 418      | 266     | 1,57 | 0,003091 | 0,299 | 202822_at   | LIM domain containing preferred translocation partner in lipoma | LPP         |
| 5220  | 35,3     | 22,5    | 1,57 | 0,040360 | 0,423 | 227816_at   | Netrin 1                                                        | NTN1        |
| 4090  | 24,7     | 15,8    | 1,57 | 0,030069 | 0,402 | 243704_at   | G patch domain containing 2                                     | GPATCH2     |
| 2161  | 41,2     | 26,2    | 1,57 | 0,014281 | 0,361 | 207565_s_at | Major histocompatibility complex, class I-related               | MR1         |
| 1951  | 25,4     | 16,2    | 1,57 | 0,012736 | 0,355 | 239296_at   | Zinc finger homeobox 1b                                         | ZFHX1B      |
| 229   | 11,0     | 6,99    | 1,57 | 0,001058 | 0,250 | 238303_at   | Oligosaccharyl transferase subunit STT3B                        | STT3B       |
| 1747  | 31,9     | 20,3    | 1,57 | 0,011154 | 0,348 | 206527_at   | 4-aminobutyrate aminotransferase                                | ABAT        |
| 2769  | 54,5     | 34,8    | 1,57 | 0,019219 | 0,379 | 238520_at   | Transcriptional regulating factor 1                             | TRERF1      |
| 2344  | 31,9     | 20,3    | 1,57 | 0,015645 | 0,364 | 1556277_a_a | PAP associated domain containing 4                              | PAPD4       |
| 457   | 11,6     | 7,43    | 1,57 | 0,002445 | 0,288 | 240016_at   | SUMO1/sentrin specific peptidase 6                              | SENPE6      |
| 81    | 45,3     | 28,9    | 1,57 | 0,000306 | 0,201 | 222239_s_at | Integrator complex subunit 6                                    | INTS6       |

| Index | Mutated* | Normal* | FC   | P value  | FDR** | Probe set   | Description                                                      | Gene symbol |
|-------|----------|---------|------|----------|-------|-------------|------------------------------------------------------------------|-------------|
| 3523  | 137      | 87,2    | 1,57 | 0,025286 | 0,392 | 226865_at   | cDNA DKFZp564O0862                                               | -           |
| 809   | 48,5     | 30,9    | 1,57 | 0,004615 | 0,311 | 228315_at   | cDNA clone IMAGE:5261213                                         | -           |
| 1594  | 97,5     | 62,2    | 1,57 | 0,009923 | 0,340 | 238706_at   | PAP associated domain containing 4                               | PAPD4       |
| 781   | 68,0     | 43,5    | 1,57 | 0,004474 | 0,311 | 223412_at   | Kelch repeat and BTB (POZ) domain containing 7                   | KBTBD7      |
| 1457  | 37,7     | 24,1    | 1,57 | 0,008909 | 0,334 | 1558105_a_a | Similar to LOC169932, clone IMAGE:4499203                        | -           |
| 247   | 28,3     | 18,1    | 1,57 | 0,001140 | 0,251 | 223465_at   | Collagen, type IV, alpha 3 (Goodpasture antigen) binding protein | COL4A3BP    |
| 3772  | 21,4     | 13,7    | 1,56 | 0,027401 | 0,397 | 207417_s_at | Zinc finger protein 177                                          | ZNF177      |
| 109   | 44,5     | 28,5    | 1,56 | 0,000439 | 0,220 | 219278_at   | Mitogen-activated protein kinase kinase kinase 6                 | MAP3K6      |
| 2032  | 33,1     | 21,2    | 1,56 | 0,013238 | 0,355 | 230708_at   | Prickle homolog 1 (Drosophila)                                   | PRICKLE1    |
| 1049  | 1657     | 1060    | 1,56 | 0,006138 | 0,319 | 210986_s_at | tropomyosin 1 (alpha)                                            | TPM1        |
| 5310  | 228      | 146     | 1,56 | 0,041427 | 0,426 | 211423_s_at | C-5 sterol desaturase                                            | SC5DL       |
| 1604  | 242      | 155     | 1,56 | 0,009995 | 0,341 | 202555_s_at | Myosin, light chain kinase                                       | MYLK        |
| 3552  | 8,49     | 5,44    | 1,56 | 0,025614 | 0,394 | 1568574_x_a | Secreted phosphoprotein 1                                        | SPP1        |
| 4760  | 82,7     | 53,0    | 1,56 | 0,036079 | 0,414 | 235103_at   | Mannosidase, alpha, class 2A, member 1                           | MAN2A1      |
| 1512  | 25,3     | 16,2    | 1,56 | 0,009313 | 0,337 | 215314_at   | Ankyrin 3, node of Ranvier (ankyrin G)                           | ANK3        |
| 344   | 33,2     | 21,3    | 1,56 | 0,001763 | 0,278 | 203263_s_at | Cdc42 guanine nucleotide exchange factor (GEF) 9                 | ARHGEF9     |
| 3979  | 16,0     | 10,2    | 1,56 | 0,029089 | 0,400 | 237128_at   | Hypothetical protein FLJ20184                                    | LOC54848    |
| 2991  | 55,6     | 35,6    | 1,56 | 0,021037 | 0,385 | 209209_s_at | Fermitin family homolog 2 (Drosophila)                           | FERMT2      |
| 4185  | 629      | 403     | 1,56 | 0,030945 | 0,404 | 201311_s_at | SH3 domain binding glutamic acid-rich protein like               | SH3BGRL     |
| 1788  | 118      | 75,6    | 1,56 | 0,011446 | 0,350 | 224933_s_at | Jumonji domain containing 1C                                     | JMJD1C      |
| 2887  | 17,6     | 11,3    | 1,56 | 0,020249 | 0,383 | 1563209_a_a | MACRO domain containing 2                                        | MACROD2     |
| 119   | 117      | 75,2    | 1,56 | 0,000531 | 0,240 | 218819_at   | Integrator complex subunit 6                                     | INTS6       |
| 5040  | 27,6     | 17,7    | 1,56 | 0,038849 | 0,420 | 228427_at   | F-box protein 16                                                 | FBXO16      |
| 4673  | 392      | 251     | 1,56 | 0,035294 | 0,413 | 225927_at   | Mitogen-activated protein kinase kinase kinase 1                 | MAP3K1      |
| 1567  | 20,8     | 13,3    | 1,56 | 0,009741 | 0,340 | 230892_at   | Transcribed locus                                                | -           |
| 675   | 235      | 151     | 1,56 | 0,003866 | 0,308 | 214352_s_at | v-Ki-ras2 Kirsten rat sarcoma viral oncogene homolog             | KRAS        |
| 1790  | 25,9     | 16,6    | 1,56 | 0,011463 | 0,350 | 230424_at   | Chromosome 5 open reading frame 13                               | C5orf13     |
| 334   | 398      | 256     | 1,56 | 0,001676 | 0,274 | 209360_s_at | Runt-related transcription factor 1 (aml1 oncogene)              | RUNX1       |
| 316   | 18,1     | 11,6    | 1,56 | 0,001588 | 0,272 | 1559957_a_a | Hypothetical protein LOC642852                                   | LOC642852   |
| 1981  | 132      | 84,8    | 1,56 | 0,012927 | 0,355 | 222798_at   | Phosphotriesterase related                                       | PTER        |
| 407   | 5,58     | 3,59    | 1,56 | 0,002145 | 0,286 | 1566772_at  | Schwannomin interacting protein 1                                | SCHIP1      |
| 4875  | 76,6     | 49,2    | 1,56 | 0,037222 | 0,417 | 222513_s_at | Sorbin and SH3 domain containing 1                               | SORBS1      |
| 1386  | 12,0     | 7,72    | 1,55 | 0,008329 | 0,329 | 1556770_a_a | Leucine rich repeat containing 17                                | LRRC17      |
| 3030  | 362      | 233     | 1,55 | 0,021326 | 0,385 | 212958_x_at | Peptidylglycine alpha-amidating monooxygenase                    | PAM         |
| 1952  | 126      | 81,1    | 1,55 | 0,012748 | 0,355 | 202124_s_at | Trafficking protein, kinesin binding 2                           | TRAK2       |
| 209   | 333      | 214     | 1,55 | 0,000955 | 0,244 | 209226_s_at | Transportin 1                                                    | TNPO1       |
| 1337  | 46,7     | 30,1    | 1,55 | 0,008024 | 0,328 | 205076_s_at | Myotubularin related protein 11                                  | MTMR11      |
| 422   | 124      | 80,2    | 1,55 | 0,002210 | 0,286 | 226259_at   | Exocyst complex component 6                                      | EXOC6       |
| 3454  | 930      | 599     | 1,55 | 0,024746 | 0,392 | 210987_x_at | tropomyosin 1 (alpha)                                            | TPM1        |
| 1709  | 10,3     | 6,63    | 1,55 | 0,010940 | 0,348 | 244443_at   | Chromodomain helicase DNA binding protein 2                      | CHD2        |
| 2558  | 86,6     | 55,8    | 1,55 | 0,017356 | 0,371 | 231862_at   | chromobox homolog 5 (HP1 alpha homolog, Drosophila)              | CBX5        |
| 4052  | 29,7     | 19,1    | 1,55 | 0,029708 | 0,401 | 241838_at   | Transcribed locus                                                | -           |
| 2518  | 32,5     | 20,9    | 1,55 | 0,016986 | 0,369 | 1566766_a_a | Metastasis associated in colon cancer 1                          | MACC1       |
| 2506  | 41,2     | 26,6    | 1,55 | 0,016850 | 0,367 | 228121_at   | Transforming growth factor, beta 2                               | TGFB2       |
| 1047  | 23,8     | 15,3    | 1,55 | 0,006120 | 0,319 | 236953_s_at | NHL repeat containing 3                                          | NHLRC3      |
| 1930  | 28,1     | 18,1    | 1,55 | 0,012581 | 0,355 | 214153_at   | ELOVL family member 5, elongation of long chain fatty acids      | ELOVL5      |
| 5288  | 1110     | 717     | 1,55 | 0,041144 | 0,425 | 221731_x_at | Versican                                                         | VCAN        |
| 2894  | 42,3     | 27,3    | 1,55 | 0,020332 | 0,383 | 210102_at   | Loss of heterozygosity, 11, chromosomal region 2, gene A         | LOH11CR2A   |
| 3108  | 73,5     | 47,4    | 1,55 | 0,021946 | 0,386 | 230229_at   | Discs, large homolog 1 (Drosophila)                              | DLG1        |
| 23    | 23,5     | 15,2    | 1,55 | 0,000099 | 0,201 | 226688_at   | Chromosome 3 open reading frame 23                               | C3orf23     |
| 4571  | 51,9     | 33,5    | 1,55 | 0,034563 | 0,412 | 204689_at   | Hematopoietically expressed homeobox                             | HHEX        |
| 803   | 21,7     | 14,0    | 1,55 | 0,004579 | 0,311 | 208022_s_at | CDC14 cell division cycle 14 homolog B (S. cerevisiae)           | CDC14B      |
| 1632  | 161      | 104     | 1,55 | 0,010284 | 0,344 | 209485_s_at | Oxysterol binding protein-like 1A                                | OSBPL1A     |
| 540   | 225      | 145     | 1,55 | 0,002897 | 0,293 | 201960_s_at | MYC binding protein 2                                            | MYCBP2      |
| 140   | 117      | 76,0    | 1,55 | 0,000635 | 0,244 | 223466_x_at | Collagen, type IV, alpha 3 (Goodpasture antigen) binding protein | COL4A3BP    |
| 2595  | 71,9     | 46,5    | 1,55 | 0,017646 | 0,371 | 201367_s_at | Zinc finger protein 36, C3H type-like 2                          | ZFP36L2     |
| 159   | 25,0     | 16,2    | 1,55 | 0,000715 | 0,244 | 240436_at   | Similar to FRAS1 related extracellular matrix protein 2          | LOC729697   |

| Index | Mutated* | Normal* | FC   | P value  | FDR** | Probe set   | Description                                                                | Gene symbol      |
|-------|----------|---------|------|----------|-------|-------------|----------------------------------------------------------------------------|------------------|
| 3258  | 21,7     | 14,1    | 1,54 | 0,023139 | 0,388 | 207029_at   | KIT ligand                                                                 | <i>KITLG</i>     |
| 550   | 212      | 137     | 1,54 | 0,002973 | 0,295 | 214430_at   | Galactosidase, alpha                                                       | <i>GLA</i>       |
| 1371  | 76,0     | 49,3    | 1,54 | 0,008235 | 0,328 | 226550_at   | Similar to LOC169932                                                       | <i>LOC169932</i> |
| 474   | 213      | 138     | 1,54 | 0,002518 | 0,289 | 225269_s_at | RNA binding motif, single stranded interacting protein 1                   | <i>RBMS1</i>     |
| 1273  | 880      | 571     | 1,54 | 0,007578 | 0,325 | 202371_at   | Transcription elongation factor A (SII)-like 4                             | <i>TCEAL4</i>    |
| 1374  | 600      | 390     | 1,54 | 0,008283 | 0,329 | 214722_at   | Notch homolog 2 (Drosophila) N-terminal like                               | <i>NOTCH2NL</i>  |
| 994   | 119      | 77,0    | 1,54 | 0,005727 | 0,315 | 212263_at   | Quaking homolog, KH domain RNA binding (mouse)                             | <i>QKI</i>       |
| 3347  | 108      | 70,1    | 1,54 | 0,023768 | 0,388 | 222757_s_at | Sterile alpha motif and leucine zipper containing kinase AZK               | <i>ZAK</i>       |
| 3778  | 159      | 103     | 1,54 | 0,027465 | 0,397 | 208935_s_at | Lectin, galactoside-binding, soluble, 8 (galectin 8)                       | <i>LGALS8</i>    |
| 1004  | 225      | 146     | 1,54 | 0,005809 | 0,316 | 201959_s_at | MYC binding protein 2                                                      | <i>MYCBP2</i>    |
| 649   | 82,9     | 53,9    | 1,54 | 0,003689 | 0,308 | 223178_s_at | 5'-nucleotidase domain containing 1                                        | <i>NT5DC1</i>    |
| 3306  | 14,0     | 9,13    | 1,54 | 0,023513 | 0,388 | 214375_at   | PTPRF interacting protein, binding protein 1 (liprin beta 1)               | <i>PPFIBP1</i>   |
| 2416  | 302      | 196     | 1,54 | 0,016133 | 0,365 | 228487_s_at | RAS responsive element binding protein 1                                   | <i>RREB1</i>     |
| 2193  | 34,8     | 22,6    | 1,54 | 0,014511 | 0,361 | 225759_x_at | Calmin (calponin-like, transmembrane)                                      | <i>CLMN</i>      |
| 361   | 1022     | 665     | 1,54 | 0,001870 | 0,283 | 221829_s_at | Transportin 1                                                              | <i>TNPO1</i>     |
| 216   | 67,9     | 44,2    | 1,54 | 0,000967 | 0,244 | 221215_s_at | Receptor-interacting serine-threonine kinase 4                             | <i>RIPK4</i>     |
| 5979  | 65,0     | 42,3    | 1,54 | 0,048543 | 0,444 | 242110_at   | Rho GTPase activating protein 5                                            | <i>ARHGAP5</i>   |
| 2195  | 106      | 69,2    | 1,54 | 0,014516 | 0,361 | 242558_at   | Catenin (cadherin-associated protein), beta 1, 88kDa                       | <i>CTNNB1</i>    |
| 238   | 170      | 111     | 1,53 | 0,001103 | 0,250 | 202304_at   | Fibronectin type III domain containing 3A                                  | <i>FNDC3A</i>    |
| 3486  | 23,2     | 15,1    | 1,53 | 0,025021 | 0,392 | 210172_at   | Splicing factor 1                                                          | <i>SF1</i>       |
| 176   | 67,6     | 44,1    | 1,53 | 0,000804 | 0,244 | 224943_at   | BTB (POZ) domain containing 7                                              | <i>BTBD7</i>     |
| 4600  | 11,2     | 7,28    | 1,53 | 0,034786 | 0,412 | 232568_at   | hypothetical protein MGC24103                                              | <i>MGC24103</i>  |
| 4694  | 1136     | 741     | 1,53 | 0,035453 | 0,413 | 200648_s_at | Glutamate-ammonia ligase (glutamine synthetase)                            | <i>GLUL</i>      |
| 2121  | 103      | 67,5    | 1,53 | 0,013913 | 0,359 | 212526_at   | Spastic paraplegia 20                                                      | <i>SPG20</i>     |
| 4073  | 253      | 165     | 1,53 | 0,029870 | 0,401 | 203753_at   | Transcription factor 4                                                     | <i>TCF4</i>      |
| 519   | 89,5     | 58,4    | 1,53 | 0,002761 | 0,291 | 238430_x_at | Schlafen family member 5                                                   | <i>SLFN5</i>     |
| 127   | 212      | 139     | 1,53 | 0,000574 | 0,240 | 215464_s_at | Tax1 (human T-cell leukemia virus type I) binding protein 3                | <i>TAX1BP3</i>   |
| 4526  | 33,4     | 21,8    | 1,53 | 0,034161 | 0,412 | 205525_at   | Caldesmon 1                                                                | <i>CALD1</i>     |
| 2172  | 67,9     | 44,3    | 1,53 | 0,014360 | 0,361 | 1566342_at  | Superoxide dismutase 2, mitochondrial                                      | <i>SOD2</i>      |
| 1734  | 17,6     | 11,5    | 1,53 | 0,011085 | 0,348 | 242737_at   | RAD51-like 1 (S. cerevisiae)                                               | <i>RAD51L1</i>   |
| 5855  | 174      | 114     | 1,53 | 0,047341 | 0,442 | 204352_at   | TNF receptor-associated factor 5                                           | <i>TRAF5</i>     |
| 722   | 62,4     | 40,8    | 1,53 | 0,004137 | 0,308 | 235341_at   | DnaJ (Hsp40) homolog, subfamily C, member 3                                | <i>DNAJC3</i>    |
| 1921  | 15,4     | 10,0    | 1,53 | 0,012516 | 0,355 | 233106_at   | Chromosome 14 open reading frame 82                                        | <i>C14orf82</i>  |
| 5150  | 68,1     | 44,5    | 1,53 | 0,039641 | 0,421 | 218775_s_at | WW and C2 domain containing 2                                              | <i>WWC2</i>      |
| 3237  | 22,2     | 14,5    | 1,53 | 0,022975 | 0,388 | 238563_at   | Spectrin SH3 domain binding protein 1                                      | <i>SSH3BP1</i>   |
| 516   | 261      | 171     | 1,53 | 0,002753 | 0,291 | 212265_at   | Quaking homolog, KH domain RNA binding (mouse)                             | <i>QKI</i>       |
| 4799  | 31,2     | 20,5    | 1,53 | 0,036413 | 0,415 | 205529_s_at | Runt-related transcription factor 1; translocated to, 1 (cyclin D-related) | <i>RUNX1T1</i>   |
| 1592  | 22,2     | 14,5    | 1,53 | 0,009902 | 0,340 | 210325_at   | CD1a molecule                                                              | <i>CD1A</i>      |
| 2268  | 18,2     | 11,9    | 1,53 | 0,015078 | 0,363 | 207018_s_at | RAB27B, member RAS oncogene family                                         | <i>RAB27B</i>    |
| 3292  | 414      | 272     | 1,52 | 0,023445 | 0,388 | 201160_s_at | Cold shock domain protein A                                                | <i>CSDA</i>      |
| 1119  | 169      | 111     | 1,52 | 0,006535 | 0,319 | 222413_s_at | Myeloid/lymphoid or mixed-lineage leukemia 3                               | <i>MLL3</i>      |
| 2989  | 52,0     | 34,1    | 1,52 | 0,021015 | 0,384 | 214720_x_at | Septin 10                                                                  | <i>SEPT10</i>    |
| 4480  | 39,6     | 26,0    | 1,52 | 0,033694 | 0,411 | 202504_at   | Tripartite motif-containing 29                                             | <i>TRIM29</i>    |
| 1922  | 44,9     | 29,5    | 1,52 | 0,012516 | 0,355 | 235457_at   | Mastermind-like 2 (Drosophila)                                             | <i>MAML2</i>     |
| 925   | 10,1     | 6,62    | 1,52 | 0,005329 | 0,313 | 1558101_at  | Nuclear factor I/A                                                         | <i>NFIA</i>      |
| 3933  | 48,3     | 31,7    | 1,52 | 0,028740 | 0,399 | 1553764_a_a | Jub, ajuba homolog (Xenopus laevis)                                        | <i>JUB</i>       |
| 332   | 124      | 81,2    | 1,52 | 0,001654 | 0,272 | 222810_s_at | RAS protein activator like 2                                               | <i>RASAL2</i>    |
| 5466  | 8,91     | 5,86    | 1,52 | 0,043170 | 0,432 | 215028_at   | Semaphorin 6A-1                                                            | <i>SEMA6A</i>    |
| 1221  | 42,6     | 28,0    | 1,52 | 0,007263 | 0,324 | 243908_at   | Zinc finger protein 638                                                    | <i>ZNF638</i>    |
| 934   | 31,6     | 20,8    | 1,52 | 0,005358 | 0,313 | 204761_at   | USP6 N-terminal like                                                       | <i>USP6NL</i>    |
| 6004  | 57,9     | 38,1    | 1,52 | 0,048789 | 0,444 | 235775_at   | Transmembrane and tetratricopeptide repeat containing 2                    | <i>TMTC2</i>     |
| 1258  | 174      | 115     | 1,52 | 0,007490 | 0,325 | 209488_s_at | RNA binding protein with multiple splicing                                 | <i>RBPMS</i>     |
| 1200  | 38,0     | 25,0    | 1,52 | 0,007086 | 0,323 | 206734_at   | Jerky homolog-like (mouse)                                                 | <i>JRKL</i>      |
| 1243  | 84,7     | 55,8    | 1,52 | 0,007383 | 0,324 | 207357_s_at | N-acetylgalactosaminyltransferase 10                                       | <i>GALNT10</i>   |
| 2692  | 131      | 86,1    | 1,52 | 0,018450 | 0,375 | 203215_s_at | Myosin VI                                                                  | <i>MYO6</i>      |
| 3802  | 18,7     | 12,3    | 1,52 | 0,027689 | 0,398 | 219683_at   | Frizzled homolog 3 (Drosophila)                                            | <i>FZD3</i>      |
| 3162  | 1052     | 694     | 1,52 | 0,022438 | 0,387 | 201288_at   | Rho GDP dissociation inhibitor (GDI) beta                                  | <i>ARHGDI2</i>   |

| Index | Mutated* | Normal* | FC   | P value  | FDR** | Probe set   | Description                                                     | Gene symbol      |
|-------|----------|---------|------|----------|-------|-------------|-----------------------------------------------------------------|------------------|
| 2035  | 269      | 177     | 1,52 | 0,013254 | 0,355 | 222605_at   | REST corepressor 3                                              | <i>RCOR3</i>     |
| 3178  | 105      | 69,4    | 1,51 | 0,022544 | 0,387 | 201656_at   | Integrin, alpha 6                                               | <i>ITGA6</i>     |
| 3078  | 161      | 107     | 1,51 | 0,021702 | 0,385 | 203143_s_at | KIAA0040 protein                                                | <i>KIAA0040</i>  |
| 202   | 11,0     | 7,30    | 1,51 | 0,000929 | 0,244 | 220302_at   | Male germ cell-associated kinase                                | <i>MAK</i>       |
| 522   | 1045     | 691     | 1,51 | 0,002786 | 0,291 | 223193_x_at | Family with sequence similarity 162, member A                   | <i>FAM162A</i>   |
| 3186  | 208      | 137     | 1,51 | 0,022596 | 0,387 | 224793_s_at | Transforming growth factor, beta receptor I                     | <i>TGFBR1</i>    |
| 3441  | 15,5     | 10,2    | 1,51 | 0,024630 | 0,391 | 233364_s_at | Hypothetical protein LOC399959                                  | <i>LOC399959</i> |
| 6     | 158      | 105     | 1,51 | 0,000013 | 0,099 | 212402_at   | Zinc finger CCCH-type containing 13                             | <i>ZC3H13</i>    |
| 2501  | 14,2     | 9,38    | 1,51 | 0,016838 | 0,367 | 208859_s_at | Alpha thalassemia/mental retardation syndrome X-linked          | <i>ATRX</i>      |
| 1801  | 11,2     | 7,42    | 1,51 | 0,011596 | 0,351 | 215164_at   | Transcription factor 4                                          | <i>TCF4</i>      |
| 1330  | 132      | 87,7    | 1,51 | 0,008001 | 0,328 | 217550_at   | Activating transcription factor 6                               | <i>ATF6</i>      |
| 2080  | 7,30     | 4,84    | 1,51 | 0,013580 | 0,356 | 239301_at   | RAS p21 protein activator (GTPase activating protein) 1         | <i>RASA1</i>     |
| 46    | 66,0     | 43,7    | 1,51 | 0,000186 | 0,201 | 235687_at   | Zinc finger protein 626                                         | <i>ZNF626</i>    |
| 263   | 16,8     | 11,1    | 1,51 | 0,001259 | 0,260 | 210255_at   | RAD51-like 1 ( <i>S. cerevisiae</i> )                           | <i>RAD51L1</i>   |
| 1832  | 22,7     | 15,1    | 1,51 | 0,011798 | 0,351 | 221556_at   | CDC14 cell division cycle 14 homolog B ( <i>S. cerevisiae</i> ) | <i>CDC14B</i>    |
| 2982  | 59,2     | 39,3    | 1,51 | 0,020965 | 0,384 | 238884_at   | Catenin (cadherin-associated protein), delta 1                  | <i>CTNND1</i>    |
| 1404  | 11,6     | 7,70    | 1,51 | 0,008477 | 0,330 | 1552269_at  | Spermatogenesis associated 17                                   | <i>SPATA17</i>   |
| 6027  | 280      | 185     | 1,51 | 0,049027 | 0,445 | 202887_s_at | DNA-damage-inducible transcript 4                               | <i>DDIT4</i>     |
| 1739  | 140      | 93,0    | 1,51 | 0,011100 | 0,348 | 213015_at   | Bobby sox homolog ( <i>Drosophila</i> )                         | <i>BBX</i>       |
| 411   | 1115     | 739     | 1,51 | 0,002170 | 0,286 | 201220_x_at | C-terminal binding protein 2                                    | <i>CTBP2</i>     |
| 5494  | 31,2     | 20,7    | 1,51 | 0,043485 | 0,433 | 233824_at   | cDNA FLJ21428 fis, clone COL04203                               | -                |
| 1026  | 25,3     | 16,8    | 1,51 | 0,005942 | 0,316 | 243709_at   | Solute carrier family 38, member 9                              | <i>SLC38A9</i>   |
| 95    | 23,9     | 15,8    | 1,51 | 0,000362 | 0,208 | 206636_at   | RAS p21 protein activator 2                                     | <i>RASA2</i>     |
| 2629  | 8,57     | 5,69    | 1,51 | 0,017897 | 0,372 | 213456_at   | Sclerostin domain containing 1                                  | <i>SOSTDC1</i>   |
| 445   | 26,2     | 17,4    | 1,51 | 0,002370 | 0,288 | 206928_at   | Zinc finger protein 124                                         | <i>ZNF124</i>    |
| 5403  | 138      | 91,7    | 1,51 | 0,042400 | 0,429 | 243768_at   | SUMO1/sentrin specific peptidase 6                              | <i>SENPE6</i>    |
| 4363  | 214      | 142     | 1,51 | 0,032453 | 0,407 | 227034_at   | Ankyrin repeat domain 57                                        | <i>ANKRD57</i>   |
| 5379  | 37,4     | 24,8    | 1,51 | 0,042181 | 0,429 | 224851_at   | Cyclin-dependent kinase 6                                       | <i>CDK6</i>      |
| 5690  | 40,9     | 27,2    | 1,50 | 0,045512 | 0,437 | 204624_at   | ATPase, Cu++ transporting, beta polypeptide                     | <i>ATP7B</i>     |
| 1938  | 273      | 182     | 1,50 | 0,012623 | 0,355 | 235308_at   | Zinc finger and BTB domain containing 20                        | <i>ZBTB20</i>    |
| 670   | 838      | 557     | 1,50 | 0,003849 | 0,308 | 224345_x_at | Family with sequence similarity 162, member A                   | <i>FAM162A</i>   |
| 244   | 1011     | 672     | 1,50 | 0,001123 | 0,251 | 209154_at   | Tax1 (human T-cell leukemia virus type I) binding protein 3     | <i>TAX1BP3</i>   |
| 210   | 44,7     | 29,7    | 1,50 | 0,000956 | 0,244 | 230192_at   | Tripartite motif-containing 13                                  | <i>TRIM13</i>    |
| 2728  | 806      | 536     | 1,50 | 0,018778 | 0,376 | 221896_s_at | HIG1 domain family, member 1A                                   | <i>HIGD1A</i>    |
| 458   | 23,5     | 15,7    | 1,50 | 0,002449 | 0,288 | 239247_at   | Hypothetical protein LOC401577                                  | <i>LOC401577</i> |
| 1131  | 86,2     | 57,4    | 1,50 | 0,006605 | 0,319 | 210223_s_at | Major histocompatibility complex, class I-related               | <i>MR1</i>       |
| 730   | 113      | 75,3    | 1,50 | 0,004173 | 0,308 | 213528_at   | Chromosome 1 open reading frame 156                             | <i>C1orf156</i>  |
| 76    | 484      | 323     | 1,50 | 0,000291 | 0,201 | 225132_at   | F-box and leucine-rich repeat protein 3                         | <i>FBXL3</i>     |
| 2908  | 56,0     | 37,3    | 1,50 | 0,020442 | 0,383 | 1566785_x_a | N-ethylmaleimide-sensitive factor                               | <i>NSF</i>       |
| 1210  | 224      | 149     | 1,50 | 0,007173 | 0,324 | 224937_at   | Prostaglandin F2 receptor negative regulator                    | <i>PTGFRN</i>    |
| 311   | 45,0     | 30,0    | 1,50 | 0,001536 | 0,270 | 1558733_at  | Zinc finger and BTB domain containing 38                        | <i>ZBTB38</i>    |
| 2811  | 99,2     | 66,2    | 1,50 | 0,019599 | 0,381 | 227276_at   | Plexin domain containing 2                                      | <i>PLXDC2</i>    |
| 79    | 34,0     | 22,7    | 1,50 | 0,000297 | 0,201 | 210943_s_at | Lysosomal trafficking regulator                                 | <i>LYST</i>      |
| 823   | 236      | 158     | 1,50 | 0,004700 | 0,312 | 209487_at   | RNA binding protein with multiple splicing                      | <i>RBPMS</i>     |
| 859   | 32,8     | 21,9    | 1,50 | 0,004964 | 0,313 | 219455_at   | Chromosome 7 open reading frame 63                              | <i>C7orf63</i>   |
| 4623  | 15,0     | 9,99    | 1,50 | 0,034877 | 0,412 | 239487_at   | Family with sequence similarity 98, member A                    | <i>FAM98A</i>    |
| 790   | 55,1     | 36,8    | 1,50 | 0,004521 | 0,311 | 228825_at   | prostaglandin reductase 1                                       | <i>PTGR1</i>     |
| 5066  | 103      | 68,9    | 1,50 | 0,038994 | 0,420 | 242467_at   | Casein kinase 1, alpha 1                                        | <i>CSNK1A1</i>   |
| 3812  | 187      | 125     | 1,50 | 0,027781 | 0,398 | 200965_s_at | Actin binding LIM protein 1                                     | <i>ABLIM1</i>    |
| 5281  | 31,4     | 21,0    | 1,50 | 0,041086 | 0,425 | 1554195_a_a | Chromosome 5 open reading frame 46                              | <i>C5orf46</i>   |
| 2063  | 147      | 98,4    | 1,50 | 0,013447 | 0,356 | 204633_s_at | Ribosomal protein S6 kinase, 90kDa, polypeptide 5               | <i>RPS6KA5</i>   |
| 3438  | 16,0     | 10,7    | 1,49 | 0,024617 | 0,391 | 240861_at   | -                                                               | -                |
| 5710  | 7,42     | 4,96    | 1,49 | 0,045721 | 0,438 | 238877_at   | Eyes absent homolog 4 ( <i>Drosophila</i> )                     | <i>EYA4</i>      |
| 1712  | 96,6     | 64,6    | 1,49 | 0,010957 | 0,348 | 204072_s_at | Furry homolog ( <i>Drosophila</i> )                             | <i>FRY</i>       |
| 416   | 103      | 69,2    | 1,49 | 0,002189 | 0,286 | 225623_at   | KIAA1737 protein                                                | <i>KIAA1737</i>  |
| 318   | 291      | 195     | 1,49 | 0,001592 | 0,272 | 208908_s_at | Calpastatin                                                     | <i>CAST</i>      |
| 2103  | 31,4     | 21,0    | 1,49 | 0,013784 | 0,358 | 243851_at   | RAB3 GTPase activating protein subunit 2 (non-catalytic)        | <i>RAB3GAP2</i>  |

| Index | Mutated* | Normal* | FC   | P value  | FDR** | Probe set   | Description                                                         | Gene symbol      |
|-------|----------|---------|------|----------|-------|-------------|---------------------------------------------------------------------|------------------|
| 5197  | 45,0     | 30,2    | 1,49 | 0,040056 | 0,421 | 1555370_a_a | Calmodulin binding transcription activator 1                        | <i>CAMTA1</i>    |
| 4740  | 153      | 103     | 1,49 | 0,035879 | 0,414 | 218967_s_at | Phosphotriesterase related                                          | <i>PTER</i>      |
| 2755  | 54,2     | 36,3    | 1,49 | 0,019071 | 0,378 | 1553186_x_a | RAS and EF-hand domain containing                                   | <i>RASEF</i>     |
| 981   | 136      | 91,2    | 1,49 | 0,005689 | 0,315 | 223177_at   | 5'-nucleotidase domain containing 1                                 | <i>NT5DC1</i>    |
| 272   | 77,2     | 51,8    | 1,49 | 0,001298 | 0,261 | 203128_at   | Serine palmitoyltransferase, long chain base subunit 2              | <i>SPTLC2</i>    |
| 3929  | 134      | 89,8    | 1,49 | 0,028733 | 0,399 | 209750_at   | Nuclear receptor subfamily 1, group D, member 2                     | <i>NR1D2</i>     |
| 1158  | 29,2     | 19,6    | 1,49 | 0,006810 | 0,321 | 229603_at   | Bardet-Biedl syndrome 12                                            | <i>BBS12</i>     |
| 21    | 484      | 325     | 1,49 | 0,000088 | 0,201 | 223287_s_at | Forkhead box P1                                                     | <i>FOXP1</i>     |
| 1527  | 9,65     | 6,48    | 1,49 | 0,009430 | 0,337 | 244860_at   | SIK family kinase 3                                                 | <i>SIK3</i>      |
| 2315  | 29,3     | 19,7    | 1,49 | 0,015371 | 0,363 | 234604_at   | cDNA FLJ21228 fis, clone COL00739                                   | -                |
| 5476  | 70,8     | 47,6    | 1,49 | 0,043292 | 0,432 | 239082_at   | cDNA clone IMAGE:5311370                                            | -                |
| 3100  | 51,0     | 34,3    | 1,49 | 0,021899 | 0,386 | 219033_at   | Poly (ADP-ribose) polymerase family, member 8                       | <i>PARP8</i>     |
| 5516  | 28,8     | 19,4    | 1,49 | 0,043749 | 0,433 | 210653_s_at | Branched chain keto acid dehydrogenase E1, beta polypeptide         | <i>BCKDHB</i>    |
| 2096  | 23,7     | 16,0    | 1,49 | 0,013733 | 0,358 | 226984_at   | FYVE, RhoGEF and PH domain containing 5                             | <i>FGD5</i>      |
| 532   | 102      | 68,4    | 1,49 | 0,002845 | 0,292 | 226977_at   | Similar to bovine IgA regulatory protein                            | <i>LOC492311</i> |
| 5792  | 405      | 272     | 1,49 | 0,046712 | 0,441 | 222258_s_at | SH3-domain binding protein 4                                        | <i>SH3BP4</i>    |
| 801   | 73,9     | 49,7    | 1,49 | 0,004571 | 0,311 | 217813_s_at | Spindlin 1                                                          | <i>SPIN1</i>     |
| 5075  | 99,6     | 67,0    | 1,49 | 0,039043 | 0,420 | 203706_s_at | Frizzled homolog 7 (Drosophila)                                     | <i>FZD7</i>      |
| 3434  | 547      | 368     | 1,49 | 0,024581 | 0,391 | 200907_s_at | Palladin, cytoskeletal associated protein                           | <i>PALLD</i>     |
| 4098  | 97,4     | 65,6    | 1,48 | 0,030117 | 0,402 | 226246_at   | Potassium channel tetramerisation domain containing 1               | <i>KCTD1</i>     |
| 425   | 159      | 107     | 1,48 | 0,002236 | 0,288 | 214041_x_at | Ribosomal protein L37a                                              | <i>RPL37A</i>    |
| 2494  | 137      | 92,5    | 1,48 | 0,016801 | 0,367 | 203319_s_at | Zinc finger protein 148                                             | <i>ZNF148</i>    |
| 4335  | 81,9     | 55,2    | 1,48 | 0,032270 | 0,407 | 207604_s_at | Solute carrier family 4, sodium bicarbonate cotransporter, member 7 | <i>SLC4A7</i>    |
| 1573  | 34,4     | 23,2    | 1,48 | 0,009768 | 0,340 | 206117_at   | Tropomyosin 1 (alpha)                                               | <i>TPM1</i>      |
| 2179  | 18,5     | 12,5    | 1,48 | 0,014410 | 0,361 | 219885_at   | schlafen family member 12                                           | <i>SLFN12</i>    |
| 5482  | 125      | 84,5    | 1,48 | 0,043380 | 0,433 | 203266_s_at | Mitogen-activated protein kinase kinase 4                           | <i>MAP2K4</i>    |
| 1036  | 77,9     | 52,5    | 1,48 | 0,006019 | 0,318 | 226722_at   | Family with sequence similarity 20, member C                        | <i>FAM20C</i>    |
| 2849  | 448      | 302     | 1,48 | 0,019937 | 0,383 | 201324_at   | Epithelial membrane protein 1                                       | <i>EMP1</i>      |
| 4784  | 10,7     | 7,20    | 1,48 | 0,036271 | 0,414 | 210282_at   | Zinc finger, MYM-type 2                                             | <i>ZMYM2</i>     |
| 2269  | 61,9     | 41,7    | 1,48 | 0,015078 | 0,363 | 219390_at   | FK506 binding protein 14, 22 kDa                                    | <i>FKBP14</i>    |
| 1466  | 135      | 91,4    | 1,48 | 0,008970 | 0,334 | 230669_at   | RAS p21 protein activator 2                                         | <i>RASA2</i>     |
| 1932  | 480      | 324     | 1,48 | 0,012601 | 0,355 | 221943_x_at | Ribosomal protein L38                                               | <i>RPL38</i>     |
| 3784  | 159      | 107     | 1,48 | 0,027562 | 0,398 | 226582_at   | Hypothetical gene supported by BC009385                             | <i>LOC400043</i> |
| 3905  | 1286     | 869     | 1,48 | 0,028521 | 0,399 | 200872_at   | S100 calcium binding protein A10                                    | <i>S100A10</i>   |
| 643   | 271      | 183     | 1,48 | 0,003668 | 0,308 | 212698_s_at | Septin 10                                                           | <i>SEPT10</i>    |
| 250   | 25,5     | 17,2    | 1,48 | 0,001148 | 0,251 | 206587_at   | Chaperonin containing TCP1, subunit 6B (zeta 2)                     | <i>CCT6B</i>     |
| 4710  | 40,3     | 27,2    | 1,48 | 0,035639 | 0,413 | 221826_at   | Angel homolog 2 (Drosophila)                                        | <i>ANGEL2</i>    |
| 4637  | 48,9     | 33,1    | 1,48 | 0,034974 | 0,412 | 201996_s_at | Spen homolog, transcriptional regulator (Drosophila)                | <i>SPEN</i>      |
| 6085  | 330      | 223     | 1,48 | 0,049690 | 0,446 | 225064_at   | Rabaptin, RAB GTPase binding effector protein 1                     | <i>RABEP1</i>    |
| 1241  | 286      | 193     | 1,48 | 0,007365 | 0,324 | 215127_s_at | RNA binding motif, single stranded interacting protein 1            | <i>RBMS1</i>     |
| 2522  | 77,8     | 52,7    | 1,48 | 0,017014 | 0,369 | 227701_at   | Chromosome 10 open reading frame 118                                | <i>C10orf118</i> |
| 3120  | 59,2     | 40,0    | 1,48 | 0,022086 | 0,387 | 228852_at   | Endosulfine alpha                                                   | <i>ENSA</i>      |
| 1746  | 183      | 124     | 1,48 | 0,011149 | 0,348 | 208663_s_at | Tetratricopeptide repeat domain 3                                   | <i>TTC3</i>      |
| 4036  | 9,30     | 6,29    | 1,48 | 0,029576 | 0,401 | 211124_s_at | KIT ligand                                                          | <i>KITLG</i>     |
| 5724  | 50,6     | 34,3    | 1,48 | 0,045873 | 0,438 | 230337_at   | SON of sevenless homolog 1 (Drosophila)                             | <i>SOS1</i>      |
| 4448  | 27,8     | 18,8    | 1,48 | 0,033401 | 0,411 | 235408_x_at | Zinc finger protein 117                                             | <i>ZNF117</i>    |
| 2653  | 11,4     | 7,69    | 1,48 | 0,018089 | 0,373 | 241789_at   | RNA binding motif, single stranded interacting protein              | <i>RBMS3</i>     |
| 793   | 15,2     | 10,3    | 1,48 | 0,004532 | 0,311 | 244023_at   | Spleen tyrosine kinase                                              | <i>SYK</i>       |
| 471   | 82,7     | 56,0    | 1,48 | 0,002509 | 0,289 | 222632_s_at | Leucine zipper transcription factor-like 1                          | <i>LZTFL1</i>    |
| 3809  | 63,1     | 42,7    | 1,48 | 0,027752 | 0,398 | 223134_at   | Bobby sox homolog (Drosophila)                                      | <i>BBX</i>       |
| 2560  | 39,3     | 26,6    | 1,48 | 0,017359 | 0,371 | 219204_s_at | serine racemase                                                     | <i>SRR</i>       |
| 3752  | 119      | 81,0    | 1,48 | 0,027281 | 0,397 | 211783_s_at | Metastasis associated 1                                             | <i>MTA1</i>      |
| 1865  | 531      | 360     | 1,48 | 0,012051 | 0,353 | 213229_at   | Dicer1, Dcr-1 homolog (Drosophila)                                  | <i>DICER1</i>    |
| 1141  | 59,4     | 40,3    | 1,47 | 0,006692 | 0,320 | 238444_at   | Zinc finger protein 618                                             | <i>ZNF618</i>    |
| 2250  | 5,69     | 3,86    | 1,47 | 0,014951 | 0,363 | 1554557_at  | ATPase, Class VI, type 11B                                          | <i>ATP11B</i>    |
| 4777  | 280      | 190     | 1,47 | 0,036218 | 0,414 | 202133_at   | WW domain containing transcription regulator 1                      | <i>WWTR1</i>     |
| 4107  | 31,0     | 21,0    | 1,47 | 0,030190 | 0,402 | 219501_at   | Ecto-NOX disulfide-thiol exchanger 1                                | <i>ENOX1</i>     |

| Index | Mutated* | Normal* | FC   | P value  | FDR** | Probe set    | Description                                                        | Gene symbol      |
|-------|----------|---------|------|----------|-------|--------------|--------------------------------------------------------------------|------------------|
| 1736  | 40,8     | 27,7    | 1,47 | 0,011097 | 0,348 | 228772_at    | Histamine N-methyltransferase                                      | <i>HNMT</i>      |
| 5917  | 43,5     | 29,6    | 1,47 | 0,047951 | 0,443 | 227415_at    | Hypothetical protein LOC283508                                     | <i>LOC283508</i> |
| 2251  | 71,0     | 48,2    | 1,47 | 0,014960 | 0,363 | 201151_s_at  | Muscleblind-like (Drosophila)                                      | <i>MBNL1</i>     |
| 2871  | 113      | 76,8    | 1,47 | 0,020167 | 0,383 | 211110_s_at  | Androgen receptor                                                  | <i>AR</i>        |
| 1560  | 200      | 136     | 1,47 | 0,009649 | 0,338 | 218595_s_at  | HEAT repeat containing 1                                           | <i>HEATR1</i>    |
| 2299  | 12,3     | 8,38    | 1,47 | 0,015275 | 0,363 | 207017_at    | RAB27B, member RAS oncogene family                                 | <i>RAB27B</i>    |
| 2975  | 114      | 77,4    | 1,47 | 0,020917 | 0,384 | 218721_s_at  | Chromosome 1 open reading frame 27                                 | <i>C1orf27</i>   |
| 3546  | 269      | 183     | 1,47 | 0,025502 | 0,393 | 218084_x_at  | FXD domain containing ion transport regulator 5                    | <i>FXD5</i>      |
| 701   | 45,0     | 30,6    | 1,47 | 0,004023 | 0,308 | 1555913_at   | Gon-4-like (C. elegans)                                            | <i>GON4L</i>     |
| 349   | 21,8     | 14,9    | 1,47 | 0,001778 | 0,278 | 238044_at    | Tripartite motif-containing 8                                      | <i>TRIM8</i>     |
| 3366  | 7,10     | 4,83    | 1,47 | 0,023903 | 0,388 | 209866_s_at  | Latrophilin 3                                                      | <i>LPHN3</i>     |
| 4591  | 19,5     | 13,3    | 1,47 | 0,034720 | 0,412 | 238575_at    | Oxysterol binding protein-like 6                                   | <i>OSBPL6</i>    |
| 1358  | 329      | 224     | 1,47 | 0,008193 | 0,328 | 224811_at    | cDNA FLJ30652 fis, clone DFNES2000011                              | -                |
| 1425  | 27,2     | 18,5    | 1,47 | 0,008633 | 0,331 | 232522_at    | Transcription factor 7-like 2 (T-cell specific, HMG-box)           | <i>TCF7L2</i>    |
| 3084  | 34,7     | 23,6    | 1,47 | 0,021728 | 0,385 | 227785_at    | Serologically defined colon cancer antigen 8                       | <i>SDCCAG8</i>   |
| 2156  | 24,9     | 17,0    | 1,47 | 0,014207 | 0,360 | 240145_at    | Transcribed locus                                                  | -                |
| 2166  | 85,7     | 58,4    | 1,47 | 0,014337 | 0,361 | 1553185_at   | RAS and EF-hand domain containing                                  | <i>RASEF</i>     |
| 3227  | 110      | 74,7    | 1,47 | 0,022857 | 0,387 | 224829_at    | Cytoplasmic polyadenylation element binding protein 4              | <i>CPEB4</i>     |
| 3272  | 181      | 124     | 1,47 | 0,023277 | 0,388 | 224252_s_at  | FXD domain containing ion transport regulator 5                    | <i>FXD5</i>      |
| 4202  | 90,2     | 61,5    | 1,47 | 0,031079 | 0,404 | 214620_x_at  | Peptidylglycine alpha-amidating monooxygenase                      | <i>PAM</i>       |
| 137   | 71,4     | 48,7    | 1,47 | 0,000619 | 0,244 | 209648_x_at  | Suppressor of cytokine signaling 5                                 | <i>SOCS5</i>     |
| 4500  | 90,0     | 61,4    | 1,47 | 0,033844 | 0,411 | 206848_at    | Homeobox A7                                                        | <i>HOXA7</i>     |
| 1309  | 158      | 108     | 1,47 | 0,007815 | 0,325 | 206453_s_at  | NDRG family member 2                                               | <i>NDRG2</i>     |
| 4606  | 264      | 180     | 1,47 | 0,034808 | 0,412 | 208936_x_at  | Lectin, galactoside-binding, soluble, 8 (galectin 8)               | <i>LGALS8</i>    |
| 4755  | 463      | 316     | 1,46 | 0,036026 | 0,414 | 224694_at    | Anthrax toxin receptor 1                                           | <i>ANTXR1</i>    |
| 1357  | 549      | 375     | 1,46 | 0,008184 | 0,328 | 221478_at    | BCL2/adenovirus E1B 19kDa interacting protein 3-like               | <i>BNIP3L</i>    |
| 1857  | 65,1     | 44,5    | 1,46 | 0,011965 | 0,352 | 1555480_a_at | Filamin binding LIM protein 1                                      | <i>FBLIM1</i>    |
| 599   | 136      | 93,0    | 1,46 | 0,003295 | 0,301 | 207956_x_at  | PDS5, regulator of cohesion maintenance, homolog B (S. cerevisiae) | <i>PDS5B</i>     |
| 1154  | 55,3     | 37,8    | 1,46 | 0,006778 | 0,321 | 231002_s_at  | Rabaptin, RAB GTPase binding effector protein 1                    | <i>RABEP1</i>    |
| 4334  | 136      | 93,0    | 1,46 | 0,032264 | 0,407 | 224726_at    | Mindbomb homolog 1 (Drosophila)                                    | <i>MIB1</i>      |
| 3027  | 59,4     | 40,6    | 1,46 | 0,021305 | 0,385 | 216202_s_at  | Serine palmitoyltransferase, long chain base subunit 2             | <i>SPTLC2</i>    |
| 928   | 18,4     | 12,6    | 1,46 | 0,005332 | 0,313 | 214052_x_at  | BAT2 domain containing 1                                           | <i>BAT2D1</i>    |
| 2334  | 9,58     | 6,55    | 1,46 | 0,015569 | 0,364 | 236558_at    | Muscleblind-like (Drosophila)                                      | <i>MBNL1</i>     |
| 464   | 322      | 220     | 1,46 | 0,002459 | 0,288 | 207657_x_at  | Transportin 1                                                      | <i>TNPO1</i>     |
| 530   | 808      | 553     | 1,46 | 0,002835 | 0,292 | 229353_s_at  | Nuclear casein kinase and cyclin-dependent kinase substrate 1      | <i>NUCKS1</i>    |
| 2927  | 18,5     | 12,7    | 1,46 | 0,020511 | 0,383 | 1552627_a_at | Rho GTPase activating protein 5                                    | <i>ARHGAP5</i>   |
| 1971  | 169      | 115     | 1,46 | 0,012883 | 0,355 | 202421_at    | Immunoglobulin superfamily, member 3                               | <i>IGSF3</i>     |
| 1454  | 13,4     | 9,19    | 1,46 | 0,008893 | 0,334 | 219523_s_at  | Odz, odd Oz/ten-m homolog 3 (Drosophila)                           | <i>ODZ3</i>      |
| 452   | 358      | 245     | 1,46 | 0,002417 | 0,288 | 207467_x_at  | Calpastatin                                                        | <i>CAST</i>      |
| 1169  | 15,4     | 10,5    | 1,46 | 0,006876 | 0,321 | 236446_at    | Transcribed locus                                                  | -                |
| 1419  | 25,4     | 17,4    | 1,46 | 0,008598 | 0,331 | 222237_s_at  | Zinc finger protein 228                                            | <i>ZNF228</i>    |
| 810   | 297      | 204     | 1,46 | 0,004618 | 0,311 | 222619_at    | Zinc finger protein 281                                            | <i>ZNF281</i>    |
| 1345  | 350      | 240     | 1,46 | 0,008066 | 0,328 | 221479_s_at  | BCL2/adenovirus E1B 19kDa interacting protein 3-like               | <i>BNIP3L</i>    |
| 4319  | 76,6     | 52,5    | 1,46 | 0,032160 | 0,407 | 1562836_at   | DEAD (Asp-Glu-Ala-Asp) box polypeptide 6                           | <i>DDX6</i>      |
| 5787  | 147      | 101     | 1,46 | 0,046602 | 0,440 | 228067_at    | Chromosome 2 open reading frame 55                                 | <i>C2orf55</i>   |
| 3941  | 297      | 204     | 1,46 | 0,028773 | 0,399 | 208933_s_at  | Lectin, galactoside-binding, soluble, 8 (galectin 8)               | <i>LGALS8</i>    |
| 2691  | 197      | 135     | 1,46 | 0,018447 | 0,375 | 228545_at    | Zinc finger protein 148                                            | <i>ZNF148</i>    |
| 4372  | 94,4     | 64,8    | 1,46 | 0,032522 | 0,407 | 230085_at    | Pyruvate dehydrogenase kinase, isozyme 3                           | <i>PKD3</i>      |
| 850   | 9,70     | 6,66    | 1,46 | 0,004893 | 0,313 | 236862_at    | Golgi associated PDZ and coiled-coil motif containing              | <i>GOPC</i>      |
| 2706  | 48,7     | 33,5    | 1,46 | 0,018554 | 0,375 | 1556373_a_at | Family with sequence similarity 185, member A                      | <i>FAM185A</i>   |
| 4563  | 14,5     | 9,96    | 1,46 | 0,034487 | 0,412 | 1557432_at   | RAS protein activator like 2                                       | <i>RASAL2</i>    |
| 883   | 453      | 311     | 1,45 | 0,005109 | 0,313 | 204517_at    | Peptidylprolyl isomerase C (cyclophilin C)                         | <i>PPIC</i>      |
| 2126  | 24,2     | 16,7    | 1,45 | 0,013994 | 0,359 | 204964_s_at  | Sarcospan (Kras oncogene-associated gene)                          | <i>SSPN</i>      |
| 942   | 40,8     | 28,1    | 1,45 | 0,005401 | 0,313 | 234912_at    | Hypothetical protein LOC651964                                     | <i>LOC651964</i> |
| 1393  | 66,2     | 45,6    | 1,45 | 0,008424 | 0,330 | 219542_at    | NIMA (never in mitosis gene a)- related kinase 11                  | <i>NEK11</i>     |
| 3112  | 180      | 124     | 1,45 | 0,021978 | 0,386 | 202379_s_at  | Natural killer-tumor recognition sequence                          | <i>NKTR</i>      |
| 3412  | 1619     | 1115    | 1,45 | 0,024339 | 0,390 | 208788_at    | ELOVL family member 5, elongation of long chain fatty acids        | <i>ELOVL5</i>    |



| Index | Mutated* | Normal* | FC   | P value  | FDR** | Probe set   | Description                                                    | Gene symbol |
|-------|----------|---------|------|----------|-------|-------------|----------------------------------------------------------------|-------------|
| 3279  | 44,8     | 30,9    | 1,45 | 0,023353 | 0,388 | 204255_s_at | Vitamin D (1,25- dihydroxyvitamin D3) receptor                 | VDR         |
| 3857  | 11,4     | 7,87    | 1,45 | 0,028161 | 0,399 | 237733_at   | KIAA0564 protein                                               | KIAA0564    |
| 1925  | 10,9     | 7,52    | 1,45 | 0,012527 | 0,355 | 243582_at   | SH3 domain containing ring finger 2                            | SH3RF2      |
| 5230  | 386      | 266     | 1,45 | 0,040466 | 0,423 | 214433_s_at | Selenium binding protein 1                                     | SELENBP1    |
| 5807  | 8,43     | 5,81    | 1,45 | 0,046861 | 0,441 | 232541_at   | Avian erythroblastic leukemia viral (v-erb-b) oncogene homolog | EGFR        |
| 3622  | 17,9     | 12,4    | 1,45 | 0,026148 | 0,395 | 215248_at   | Growth factor receptor-bound protein 10                        | GRB10       |
| 573   | 696      | 480     | 1,45 | 0,003149 | 0,300 | 201218_at   | C-terminal binding protein 2                                   | CTBP2       |
| 303   | 129      | 88,9    | 1,45 | 0,001465 | 0,263 | 210596_at   | Magnesium transporter 1                                        | MAGT1       |
| 1177  | 156      | 108     | 1,45 | 0,006912 | 0,321 | 225295_at   | Solute carrier family 39 (zinc transporter), member 10         | SLC39A10    |
| 4695  | 55,5     | 38,3    | 1,45 | 0,035459 | 0,413 | 225178_at   | Tetratricopeptide repeat domain 14                             | TTC14       |
| 2714  | 1094     | 755     | 1,45 | 0,018626 | 0,375 | 217845_x_at | HIG1 domain family, member 1A                                  | HIGD1A      |
| 2454  | 36,6     | 25,3    | 1,45 | 0,016453 | 0,366 | 216682_s_at | Family with sequence similarity 48, member A                   | FAM48A      |
| 3126  | 92,1     | 63,6    | 1,45 | 0,022169 | 0,387 | 207233_s_at | Microphthalmia-associated transcription factor                 | MITF        |
| 5193  | 9,78     | 6,75    | 1,45 | 0,040022 | 0,421 | 226210_s_at | Maternally expressed 3                                         | MEG3        |
| 174   | 5,84     | 4,03    | 1,45 | 0,000800 | 0,244 | 237951_at   | Zinc finger protein 2 homlog (mouse)                           | ZFP2        |
| 4005  | 14,7     | 10,2    | 1,45 | 0,029314 | 0,400 | 1566442_at  | Chromosome 1 open reading frame 21                             | C1orf21     |
| 1389  | 70,3     | 48,5    | 1,45 | 0,008388 | 0,330 | 214056_at   | Myeloid cell leukemia sequence 1 (BCL2-related)                | MCL1        |
| 6077  | 57,6     | 39,8    | 1,45 | 0,049587 | 0,446 | 228806_at   | RAR-related orphan receptor C                                  | RORC        |
| 4958  | 107      | 74,1    | 1,45 | 0,038042 | 0,419 | 226245_at   | Potassium channel tetramerisation domain containing 1          | KCTD1       |
| 3313  | 98,6     | 68,2    | 1,45 | 0,023552 | 0,388 | 213593_s_at | Transformer-2 alpha                                            | TRA2A       |
| 2760  | 309      | 213     | 1,45 | 0,019155 | 0,379 | 211202_s_at | Jumonji, AT rich interactive domain 1B                         | JARID1B     |
| 4380  | 11,8     | 8,16    | 1,45 | 0,032570 | 0,407 | 209792_s_at | Kallikrein-related peptidase 10                                | KLK10       |
| 312   | 10,6     | 7,35    | 1,45 | 0,001564 | 0,272 | 214422_at   | RAD23 homolog B (S. cerevisiae)                                | RAD23B      |
| 3023  | 71,5     | 49,5    | 1,44 | 0,021277 | 0,385 | 213956_at   | Centrosomal protein 350kDa                                     | CEP350      |
| 4094  | 263      | 182     | 1,44 | 0,030088 | 0,402 | 201616_s_at | Caldesmon 1                                                    | CALD1       |
| 2028  | 24,1     | 16,7    | 1,44 | 0,013220 | 0,355 | 208499_s_at | DnaJ (Hsp40) homolog, subfamily C, member 3                    | DNAJC3      |
| 131   | 52,4     | 36,3    | 1,44 | 0,000586 | 0,240 | 218849_s_at | Protein phosphatase 1, regulatory (inhibitor) subunit 13 like  | PPP1R13L    |
| 1809  | 25,5     | 17,7    | 1,44 | 0,011666 | 0,351 | 232776_at   | PDZ domain containing ring finger 3                            | PDZRN3      |
| 3596  | 41,8     | 28,9    | 1,44 | 0,025928 | 0,394 | 232333_at   | Mastermind-like 2 (Drosophila)                                 | MAML2       |
| 2815  | 122      | 84,6    | 1,44 | 0,019632 | 0,381 | 202321_at   | Geranylgeranyl diphosphate synthase 1                          | GGPS1       |
| 1585  | 101      | 69,8    | 1,44 | 0,009867 | 0,340 | 202514_at   | Discs, large homolog 1 (Drosophila)                            | DLG1        |
| 3131  | 77,0     | 53,4    | 1,44 | 0,022212 | 0,387 | 225968_at   | Prickle homolog 2 (Drosophila)                                 | PRICKLE2    |
| 4388  | 288      | 200     | 1,44 | 0,032699 | 0,407 | 201549_x_at | Jumonji, AT rich interactive domain 1B                         | JARID1B     |
| 6056  | 251      | 174     | 1,44 | 0,049403 | 0,446 | 226538_at   | Mannosidase, alpha, class 2A, member 1                         | MAN2A1      |
| 551   | 109      | 75,5    | 1,44 | 0,002974 | 0,295 | 203127_s_at | Serine palmitoyltransferase, long chain base subunit 2         | SPTLC2      |
| 3561  | 12,7     | 8,84    | 1,44 | 0,025700 | 0,394 | 239784_at   | SET and MYND domain containing 3                               | SMYD3       |
| 1656  | 325      | 226     | 1,44 | 0,010451 | 0,345 | 221816_s_at | PHD finger protein 11                                          | PHF11       |
| 248   | 157      | 109     | 1,44 | 0,001141 | 0,251 | 225192_at   | Chromosome 10 open reading frame 46                            | C10orf46    |
| 3394  | 55,6     | 38,6    | 1,44 | 0,024189 | 0,390 | 228173_at   | GNAS complex locus                                             | GNAS        |
| 1556  | 57,8     | 40,1    | 1,44 | 0,009606 | 0,337 | 222679_s_at | DCUN1 domain-containing protein 1                              | DCUN1D1     |
| 2832  | 86,8     | 60,3    | 1,44 | 0,019764 | 0,381 | 223380_s_at | LATS, large tumor suppressor, homolog 2 (Drosophila)           | LATS2       |
| 158   | 346      | 241     | 1,44 | 0,000714 | 0,244 | 201152_s_at | Muscleblind-like (Drosophila)                                  | MBNL1       |
| 2929  | 69,2     | 48,1    | 1,44 | 0,020535 | 0,383 | 222850_s_at | DnaJ (Hsp40) homolog, subfamily B, member 14                   | DNAJB14     |
| 2475  | 103      | 71,2    | 1,44 | 0,016666 | 0,367 | 204345_at   | Collagen, type XVI, alpha 1                                    | COL16A1     |
| 3913  | 48,2     | 33,5    | 1,44 | 0,028564 | 0,399 | 229689_s_at | Discs, large homolog 5 (Drosophila)                            | DLG5        |
| 6064  | 35,0     | 24,3    | 1,44 | 0,049456 | 0,446 | 235000_at   | cDNA FLJ30652 fis, clone DFNES2000011                          | -           |
| 208   | 57,8     | 40,2    | 1,44 | 0,000955 | 0,244 | 214001_x_at | Family with sequence similarity 110, member A                  | FAM110A     |
| 3939  | 187      | 130     | 1,44 | 0,028764 | 0,399 | 212387_at   | Transcription factor 4                                         | TCF4        |
| 980   | 6,13     | 4,27    | 1,44 | 0,005688 | 0,315 | 242664_at   | -                                                              | -           |
| 217   | 754      | 525     | 1,44 | 0,000970 | 0,244 | 224596_at   | Solute carrier family 44, member 1                             | SLC44A1     |
| 4053  | 10,6     | 7,37    | 1,44 | 0,029723 | 0,401 | 243140_at   | Actin, alpha 2, smooth muscle, aorta                           | ACTA2       |
| 2311  | 208      | 145     | 1,44 | 0,015361 | 0,363 | 227322_s_at | BRCA2 and CDKN1A interacting protein                           | BCCIP       |
| 1721  | 76,0     | 52,9    | 1,44 | 0,011024 | 0,348 | 225988_at   | Hect domain and RLD 4                                          | HERC4       |
| 4899  | 10,5     | 7,28    | 1,44 | 0,037488 | 0,418 | 1563022_at  | Coiled-coil domain containing 160                              | CCDC160     |
| 5926  | 187      | 130     | 1,44 | 0,048015 | 0,443 | 208934_s_at | Lectin, galactoside-binding, soluble, 8 (galectin 8)           | LGALS8      |
| 3044  | 47,5     | 33,1    | 1,44 | 0,021431 | 0,385 | 1565639_a_a | Peripheral myelin protein 22                                   | PMP22       |
| 2920  | 53,5     | 37,2    | 1,44 | 0,020492 | 0,383 | 212634_at   | KIAA0776 protein                                               | KIAA0776    |

| Index | Mutated* | Normal* | FC   | P value  | FDR** | Probe set   | Description                                                      | Gene symbol |
|-------|----------|---------|------|----------|-------|-------------|------------------------------------------------------------------|-------------|
| 84    | 109      | 75,7    | 1,44 | 0,000313 | 0,201 | 208127_s_at | Suppressor of cytokine signaling 5                               | SOCS5       |
| 726   | 5,63     | 3,92    | 1,44 | 0,004148 | 0,308 | 1555573_at  | Chromosome 10 open reading frame 93                              | C10orf93    |
| 963   | 227      | 158     | 1,43 | 0,005572 | 0,315 | 218501_at   | Rho guanine nucleotide exchange factor (GEF) 3                   | ARHGEF3     |
| 1634  | 7,77     | 5,42    | 1,43 | 0,010310 | 0,344 | 240110_at   | 3-hydroxy-3-methylglutaryl-Coenzyme A synthase 2 (mitochondrial) | HMGCS2      |
| 699   | 146      | 102     | 1,43 | 0,004009 | 0,308 | 222424_s_at | Nuclear casein kinase and cyclin-dependent kinase substrate 1    | NUCKS1      |
| 1812  | 70,7     | 49,3    | 1,43 | 0,011684 | 0,351 | 215281_x_at | Pogo transposable element with ZNF domain                        | POGZ        |
| 4311  | 23,9     | 16,7    | 1,43 | 0,032096 | 0,407 | 242144_at   | PAP associated domain containing 4                               | PAPD4       |
| 440   | 7,19     | 5,01    | 1,43 | 0,002338 | 0,288 | 231247_s_at | Hypothetical protein LOC730257                                   | LOC730257   |
| 2016  | 523      | 364     | 1,43 | 0,013150 | 0,355 | 212586_at   | Calpastatin                                                      | CAST        |
| 5620  | 19,3     | 13,5    | 1,43 | 0,044865 | 0,436 | 235121_at   | Zinc finger protein 542                                          | ZNF542      |
| 3522  | 71,0     | 49,5    | 1,43 | 0,025277 | 0,392 | 227931_at   | INO80 complex subunit D                                          | INO80D      |
| 5642  | 213      | 149     | 1,43 | 0,045018 | 0,436 | 201694_s_at | Early growth response 1                                          | EGR1        |
| 3223  | 30,0     | 20,9    | 1,43 | 0,022835 | 0,387 | 1569353_at  | CP110 protein                                                    | CP110       |
| 1196  | 133      | 92,8    | 1,43 | 0,007063 | 0,323 | 207266_x_at | RNA binding motif, single stranded interacting protein 1         | RBMS1       |
| 2186  | 22,3     | 15,6    | 1,43 | 0,014484 | 0,361 | 210281_s_at | Zinc finger, MYM-type 2                                          | ZMYM2       |
| 3386  | 1537     | 1073    | 1,43 | 0,024121 | 0,389 | 201312_s_at | SH3 domain binding glutamic acid-rich protein like               | SH3BGRL     |
| 77    | 66,7     | 46,5    | 1,43 | 0,000292 | 0,201 | 212746_s_at | Centrosomal protein 170kDa                                       | CEP170      |
| 4892  | 169      | 118     | 1,43 | 0,037385 | 0,418 | 223681_s_at | InaD-like (Drosophila)                                           | INADL       |
| 2394  | 287      | 200     | 1,43 | 0,015979 | 0,365 | 206555_s_at | THUMP domain containing 1                                        | THUMPD1     |
| 5374  | 13,4     | 9,33    | 1,43 | 0,042164 | 0,429 | 205559_s_at | Proprotein convertase subtilisin/kexin type 5                    | PCSK5       |
| 1725  | 145      | 101     | 1,43 | 0,011045 | 0,348 | 218149_s_at | Zinc finger protein 395                                          | ZNF395      |
| 3225  | 15,0     | 10,5    | 1,43 | 0,022842 | 0,387 | 1565566_a_a | Syntaxin 7                                                       | STX7        |
| 1446  | 156      | 109     | 1,43 | 0,008790 | 0,332 | 201917_s_at | Solute carrier family 25, member 36                              | SLC25A36    |
| 2077  | 50,8     | 35,5    | 1,43 | 0,013569 | 0,356 | 220296_at   | N-acetylgalactosaminyltransferase 10                             | GALNT10     |
| 397   | 482      | 337     | 1,43 | 0,002086 | 0,285 | 211967_at   | Transmembrane protein 123                                        | TMEM123     |
| 1803  | 179      | 125     | 1,43 | 0,011612 | 0,351 | 224889_at   | Forkhead box O3                                                  | FOXO3       |
| 4435  | 116      | 81,2    | 1,43 | 0,033215 | 0,409 | 227561_at   | Discoidin domain receptor family, member 2                       | DDR2        |
| 419   | 297      | 207     | 1,43 | 0,002195 | 0,286 | 201846_s_at | RING1 and YY1 binding protein                                    | RYBP        |
| 286   | 449      | 314     | 1,43 | 0,001399 | 0,263 | 225010_at   | Coiled-coil domain containing 6                                  | CCDC6       |
| 3402  | 79,1     | 55,3    | 1,43 | 0,024278 | 0,390 | 226876_at   | Family with sequence similarity 101, member B                    | FAM101B     |
| 5495  | 14,3     | 10,0    | 1,43 | 0,043490 | 0,433 | 205006_s_at | N-myristoyltransferase 2                                         | NMT2        |
| 3530  | 37,5     | 26,3    | 1,43 | 0,025361 | 0,393 | 232994_s_at | Rho-guanine nucleotide exchange factor                           | RGNEF       |
| 873   | 250      | 175     | 1,43 | 0,005045 | 0,313 | 202184_s_at | Nucleoporin 133kDa                                               | NUP133      |
| 855   | 20,8     | 14,6    | 1,43 | 0,004930 | 0,313 | 222565_s_at | Protein kinase D3                                                | PRKD3       |
| 5158  | 87,2     | 61,0    | 1,43 | 0,039715 | 0,421 | 226899_at   | Unc-5 homolog B (C. elegans)                                     | UNC5B       |
| 2116  | 13,9     | 9,70    | 1,43 | 0,013875 | 0,359 | 236417_at   | cDNA clone Y140G07                                               | MFN1        |
| 2502  | 46,6     | 32,6    | 1,43 | 0,016840 | 0,367 | 214395_x_at | Eukaryotic translation elongation factor 1 delta                 | EEF1D       |
| 2688  | 87,6     | 61,3    | 1,43 | 0,018424 | 0,375 | 1568678_s_a | FGFR1 oncogene partner                                           | FGFR1OP     |
| 5285  | 510      | 357     | 1,43 | 0,041112 | 0,425 | 209684_at   | RAS and RAB interactor 2                                         | RIN2        |
| 1903  | 171      | 120     | 1,43 | 0,012376 | 0,355 | 204290_s_at | Aldehyde dehydrogenase 6 family, member A1                       | ALDH6A1     |
| 4282  | 14,6     | 10,2    | 1,43 | 0,031816 | 0,406 | 233607_at   | Bicaudal C homolog 1 (Drosophila)                                | BICC1       |
| 5555  | 13,4     | 9,37    | 1,43 | 0,044219 | 0,435 | 236322_at   | Ring finger protein 145                                          | RNF145      |
| 5073  | 338      | 237     | 1,43 | 0,039041 | 0,420 | 212492_s_at | Jumonji domain containing 2B                                     | JMJD2B      |
| 1962  | 112      | 78,5    | 1,43 | 0,012819 | 0,355 | 201219_at   | C-terminal binding protein 2                                     | CTBP2       |
| 1033  | 942      | 661     | 1,43 | 0,006002 | 0,318 | 220942_x_at | Family with sequence similarity 162, member A                    | FAM162A     |
| 4593  | 493      | 345     | 1,43 | 0,034757 | 0,412 | 214709_s_at | Kinectin 1 (kinesin receptor)                                    | KTN1        |
| 465   | 157      | 110     | 1,43 | 0,002459 | 0,288 | 224736_at   | Cell division cycle and apoptosis regulator 1                    | CCAR1       |
| 2132  | 15,7     | 11,0    | 1,43 | 0,014015 | 0,359 | 221986_s_at | Kelch-like 24 (Drosophila)                                       | KLHL24      |
| 2509  | 28,5     | 20,0    | 1,43 | 0,016870 | 0,368 | 235959_at   | AT rich interactive domain 4B (RBP1-like)                        | ARID4B      |
| 346   | 132      | 92,8    | 1,43 | 0,001775 | 0,278 | 218491_s_at | Thymocyte nuclear protein 1                                      | THYN1       |
| 5567  | 20,8     | 14,6    | 1,43 | 0,044315 | 0,435 | 204324_s_at | Golgi integral membrane protein 4                                | GOLIM4      |
| 4869  | 125      | 87,8    | 1,43 | 0,037158 | 0,417 | 217738_at   | Pre-B-cell colony enhancing factor 1                             | PBEF1       |
| 5587  | 54,6     | 38,3    | 1,42 | 0,044562 | 0,436 | 222592_s_at | Acyl-CoA synthetase long-chain family member 5                   | ACSL5       |
| 3532  | 29,2     | 20,5    | 1,42 | 0,025384 | 0,393 | 238493_at   | Zinc finger protein 506                                          | ZNF506      |
| 3174  | 79,7     | 56,0    | 1,42 | 0,022511 | 0,387 | 229732_at   | Zinc finger protein 823                                          | ZNF823      |
| 1953  | 97,2     | 68,2    | 1,42 | 0,012763 | 0,355 | 219553_at   | Nucleoside diphosphate kinase 7                                  | NME7        |
| 1421  | 533      | 375     | 1,42 | 0,008609 | 0,331 | 208661_s_at | Tetratricopeptide repeat domain 3                                | TTC3        |

| Index | Mutated* | Normal* | FC   | P value  | FDR** | Probe set   | Description                                                            | Gene symbol       |
|-------|----------|---------|------|----------|-------|-------------|------------------------------------------------------------------------|-------------------|
| 5589  | 69,2     | 48,7    | 1,42 | 0,044579 | 0,436 | 223201_s_at | Transmembrane protein 164                                              | <i>TMEM164</i>    |
| 52    | 9,29     | 6,54    | 1,42 | 0,000201 | 0,201 | 207068_at   | Zinc finger protein 37 homolog (mouse)                                 | <i>ZFP37</i>      |
| 1980  | 26,2     | 18,5    | 1,42 | 0,012920 | 0,355 | 1556049_at  | Reticulon 4                                                            | <i>RTN4</i>       |
| 1622  | 538      | 379     | 1,42 | 0,010180 | 0,343 | 201008_s_at | Thioredoxin interacting protein                                        | <i>TXNIP</i>      |
| 692   | 6,73     | 4,74    | 1,42 | 0,003985 | 0,308 | 1559706_at  | Rho-guanine nucleotide exchange factor                                 | <i>RGNEF</i>      |
| 2777  | 272      | 192     | 1,42 | 0,019296 | 0,380 | 208158_s_at | Oxysterol binding protein-like 1A                                      | <i>OSBPL1A</i>    |
| 2220  | 17,5     | 12,3    | 1,42 | 0,014713 | 0,362 | 236600_at   | Spastic paraplegia 20                                                  | <i>SPG20</i>      |
| 1471  | 179      | 126     | 1,42 | 0,008991 | 0,334 | 221588_x_at | Aldehyde dehydrogenase 6 family, member A1                             | <i>ALDH6A1</i>    |
| 2743  | 28,2     | 19,9    | 1,42 | 0,018927 | 0,377 | 1565149_at  | Dynein, cytoplasmic 2, heavy chain 1                                   | <i>DYNC2H1</i>    |
| 4116  | 55,9     | 39,4    | 1,42 | 0,030270 | 0,402 | 205588_s_at | FGFR1 oncogene partner                                                 | <i>FGFR1OP</i>    |
| 3141  | 105      | 74,1    | 1,42 | 0,022294 | 0,387 | 227121_at   | cDNA DKFZp586K1922                                                     | -                 |
| 339   | 43,9     | 30,9    | 1,42 | 0,001733 | 0,277 | 227056_at   | KIAA0141 protein                                                       | <i>KIAA0141</i>   |
| 846   | 76,7     | 54,1    | 1,42 | 0,004873 | 0,313 | 235889_at   | Transcribed locus                                                      | -                 |
| 2170  | 50,0     | 35,3    | 1,42 | 0,014349 | 0,361 | 205786_s_at | Integrin, alpha M (complement component 3 receptor 3 subunit)          | <i>ITGAM</i>      |
| 4642  | 7,31     | 5,15    | 1,42 | 0,035008 | 0,412 | 206713_at   | Netrin G1                                                              | <i>NTNG1</i>      |
| 5241  | 248      | 175     | 1,42 | 0,040595 | 0,423 | 218435_at   | DnaJ (Hsp40) homolog, subfamily C, member 15                           | <i>DNAJC15</i>    |
| 4112  | 41,3     | 29,2    | 1,42 | 0,030216 | 0,402 | 208555_x_at | Cystatin SA                                                            | <i>CST2</i>       |
| 2819  | 73,3     | 51,8    | 1,42 | 0,019671 | 0,381 | 214499_s_at | BCL2-associated transcription factor 1                                 | <i>BCLAF1</i>     |
| 5122  | 47,0     | 33,2    | 1,41 | 0,039430 | 0,421 | 209781_s_at | KH domain containing, RNA binding, signal transduction associated 3    | <i>KHDRBS3</i>    |
| 4580  | 17,1     | 12,1    | 1,41 | 0,034614 | 0,412 | 239486_at   | Transcribed locus                                                      | -                 |
| 4560  | 25,8     | 18,3    | 1,41 | 0,034463 | 0,412 | 229276_at   | Immunoglobulin superfamily, member 9                                   | <i>IGSF9</i>      |
| 302   | 84,9     | 60,0    | 1,41 | 0,001464 | 0,263 | 223711_s_at | Thymocyte nuclear protein 1                                            | <i>THYN1</i>      |
| 3502  | 210      | 148     | 1,41 | 0,025172 | 0,392 | 209210_s_at | Fermitin family homolog 2 (Drosophila)                                 | <i>FERMT2</i>     |
| 4599  | 96,6     | 68,4    | 1,41 | 0,034777 | 0,412 | 229238_at   | Chromosome 17 open reading frame 97                                    | <i>C17orf97</i>   |
| 5304  | 41,6     | 29,5    | 1,41 | 0,041386 | 0,426 | 244674_at   | RNA binding motif protein 6                                            | <i>RBM6</i>       |
| 1491  | 148      | 105     | 1,41 | 0,009194 | 0,336 | 219622_at   | RAB20, member RAS oncogene family                                      | <i>RAB20</i>      |
| 4669  | 37,1     | 26,3    | 1,41 | 0,035252 | 0,413 | 234785_at   | -                                                                      | -                 |
| 5957  | 231      | 164     | 1,41 | 0,048343 | 0,444 | 210480_s_at | Myosin VI                                                              | <i>MYO6</i>       |
| 3602  | 117      | 83,1    | 1,41 | 0,025977 | 0,394 | 225956_at   | Adult retina protein                                                   | <i>LOC153222</i>  |
| 1879  | 24,8     | 17,6    | 1,41 | 0,012162 | 0,354 | 204037_at   | Lysophosphatidic acid receptor 1                                       | <i>EDG2</i>       |
| 2477  | 769      | 545     | 1,41 | 0,016675 | 0,367 | 222433_at   | Enabled homolog (Drosophila)                                           | <i>ENAH</i>       |
| 444   | 10,6     | 7,52    | 1,41 | 0,002366 | 0,288 | 212079_s_at | Myeloid/lymphoid or mixed-lineage leukemia                             | <i>MLL</i>        |
| 6051  | 88,0     | 62,4    | 1,41 | 0,049301 | 0,445 | 1553575_at  | Mitochondrially encoded NADH dehydrogenase 6                           | <i>MTND6</i>      |
| 2145  | 13,2     | 9,35    | 1,41 | 0,014119 | 0,360 | 1559361_at  | Metastasis associated in colon cancer 1                                | <i>MACC1</i>      |
| 4382  | 19,5     | 13,8    | 1,41 | 0,032602 | 0,407 | 227752_at   | Serine palmitoyltransferase, long chain base subunit 3                 | <i>SPTLC3</i>     |
| 2588  | 23,7     | 16,8    | 1,41 | 0,017550 | 0,371 | 209293_x_at | Inhibitor of DNA binding 4, dominant negative helix-loop-helix protein | <i>ID4</i>        |
| 3045  | 43,0     | 30,5    | 1,41 | 0,021431 | 0,385 | 239515_at   | Sperm autoantigenic protein 17                                         | <i>SPA17</i>      |
| 3630  | 15,5     | 11,0    | 1,41 | 0,026233 | 0,395 | 231235_at   | Natural killer-tumor recognition sequence                              | <i>NKTR</i>       |
| 1066  | 79,8     | 56,7    | 1,41 | 0,006255 | 0,319 | 211711_s_at | Phosphatase and tensin homolog                                         | <i>PTEN</i>       |
| 3382  | 150      | 106     | 1,41 | 0,024073 | 0,389 | 214055_x_at | BAT2 domain containing 1                                               | <i>BAT2D1</i>     |
| 3040  | 36,9     | 26,2    | 1,41 | 0,021426 | 0,385 | 230179_at   | Hypothetical protein LOC285812                                         | <i>LOC285812</i>  |
| 1009  | 13,0     | 9,24    | 1,41 | 0,005855 | 0,316 | 239606_at   | I beta-1,6-N-acetylglucosaminyltransferase                             | <i>GCNT2</i>      |
| 1703  | 10,1     | 7,18    | 1,41 | 0,010860 | 0,348 | 232978_at   | Muscleblind-like 2 (Drosophila)                                        | <i>MBNL2</i>      |
| 489   | 16,7     | 11,9    | 1,41 | 0,002620 | 0,289 | 238723_at   | Ataxin 3                                                               | <i>ATXN3</i>      |
| 5497  | 142      | 101     | 1,41 | 0,043511 | 0,433 | 213224_s_at | Non-protein coding RNA 81                                              | <i>NCRNA00081</i> |
| 3635  | 12,8     | 9,10    | 1,41 | 0,026290 | 0,395 | 236562_at   | Zinc finger protein 439                                                | <i>ZNF439</i>     |
| 2548  | 236      | 168     | 1,41 | 0,017216 | 0,369 | 203318_s_at | Zinc finger protein 148                                                | <i>ZNF148</i>     |
| 2745  | 216      | 154     | 1,41 | 0,018992 | 0,378 | 205383_s_at | Zinc finger and BTB domain containing 20                               | <i>ZBTB20</i>     |
| 1956  | 246      | 175     | 1,41 | 0,012781 | 0,355 | 203640_at   | Muscleblind-like 2 (Drosophila)                                        | <i>MBNL2</i>      |
| 3690  | 234      | 166     | 1,41 | 0,026655 | 0,395 | 225258_at   | Filamin binding LIM protein 1                                          | <i>FBLIM1</i>     |
| 5090  | 6,45     | 4,59    | 1,41 | 0,039171 | 0,420 | 1556125_at  | G patch domain containing 2                                            | <i>GPATCH2</i>    |
| 5851  | 19,9     | 14,1    | 1,41 | 0,047333 | 0,442 | 237107_at   | Protein kinase, interferon-inducible double stranded RNA dependent     | <i>PRKRA</i>      |
| 2904  | 53,9     | 38,3    | 1,41 | 0,020424 | 0,383 | 232693_s_at | Zinc finger protein 395                                                | <i>ZNF395</i>     |
| 111   | 204      | 145     | 1,41 | 0,000471 | 0,232 | 209225_x_at | Transportin 1                                                          | <i>TNPO1</i>      |
| 2067  | 102      | 72,3    | 1,41 | 0,013504 | 0,356 | 231873_at   | Bone morphogenetic protein receptor, type II                           | <i>BMPRII</i>     |
| 1799  | 17,8     | 12,6    | 1,40 | 0,011579 | 0,351 | 1561181_at  | AT rich interactive domain 5B (MRF1-like)                              | <i>ARID5B</i>     |
| 2541  | 441      | 314     | 1,40 | 0,017180 | 0,369 | 202028_s_at | Ribosomal protein L38                                                  | <i>RPL38</i>      |

| Index | Mutated* | Normal* | FC   | P value  | FDR** | Probe set   | Description                                                    | Gene symbol     |
|-------|----------|---------|------|----------|-------|-------------|----------------------------------------------------------------|-----------------|
| 5112  | 66,8     | 47,6    | 1,40 | 0,039357 | 0,421 | 200841_s_at | Glutamyl-prolyl-tRNA synthetase                                | <i>EPRS</i>     |
| 4709  | 164      | 117     | 1,40 | 0,035626 | 0,413 | 209348_s_at | v-maf musculoaponeurotic fibrosarcoma oncogene homolog (avian) | <i>MAF</i>      |
| 1013  | 17,1     | 12,2    | 1,40 | 0,005865 | 0,316 | 238693_at   | Polyhomeotic homolog 3 (Drosophila)                            | <i>PHC3</i>     |
| 4426  | 21,0     | 15,0    | 1,40 | 0,033150 | 0,409 | 240758_at   | ArfGAP with GTPase domain, ankyrin repeat and PH domain 1      | <i>AGAP1</i>    |
| 2382  | 24,8     | 17,7    | 1,40 | 0,015884 | 0,364 | 222693_at   | Fibronectin type III domain containing 3B                      | <i>FNDC3B</i>   |
| 1999  | 188      | 134     | 1,40 | 0,013063 | 0,355 | 203232_s_at | Ataxin 1                                                       | <i>ATXN1</i>    |
| 1584  | 18,5     | 13,2    | 1,40 | 0,009866 | 0,340 | 242814_at   | Serpin peptidase inhibitor, clade B (ovalbumin), member 9      | <i>SERPINB9</i> |
| 1847  | 150      | 107     | 1,40 | 0,011890 | 0,352 | 209868_s_at | RNA binding motif, single stranded interacting protein 1       | <i>RBMS1</i>    |
| 5339  | 177      | 126     | 1,40 | 0,041804 | 0,428 | 224595_at   | Solute carrier family 44, member 1                             | <i>SLC44A1</i>  |
| 3361  | 41,4     | 29,6    | 1,40 | 0,023885 | 0,388 | 216235_s_at | Endothelin receptor type A                                     | <i>EDNRA</i>    |
| 4038  | 4,99     | 3,56    | 1,40 | 0,029589 | 0,401 | 221008_s_at | Alanine-glyoxylate aminotransferase 2-like 1                   | <i>AGXT2L1</i>  |
| 5566  | 60,3     | 43,1    | 1,40 | 0,044312 | 0,435 | 229694_at   | Bromodomain and WD repeat domain containing 2                  | <i>BRWD2</i>    |
| 601   | 147      | 105     | 1,40 | 0,003343 | 0,303 | 203656_at   | FIG4 homolog ( <i>S. cerevisiae</i> )                          | <i>FIG4</i>     |
| 3464  | 68,2     | 48,7    | 1,40 | 0,024821 | 0,392 | 218401_s_at | Zinc finger protein 281                                        | <i>ZNF281</i>   |
| 347   | 105      | 75,2    | 1,40 | 0,001777 | 0,278 | 212604_at   | Mitochondrial ribosomal protein S31                            | <i>MRPS31</i>   |
| 837   | 840      | 601     | 1,40 | 0,004801 | 0,313 | 210554_s_at | C-terminal binding protein 2                                   | <i>CTBP2</i>    |
| 4431  | 7,34     | 5,24    | 1,40 | 0,033187 | 0,409 | 205871_at   | Plasminogen-like B2                                            | <i>PLGLB2</i>   |
| 2690  | 15,8     | 11,3    | 1,40 | 0,018445 | 0,375 | 228686_at   | Hypothetical protein LOC644873                                 | <i>FLJ33630</i> |
| 1146  | 9,76     | 6,98    | 1,40 | 0,006731 | 0,321 | 207264_at   | KDEL endoplasmic reticulum protein retention receptor 3        | <i>KDELR3</i>   |
| 2641  | 57,0     | 40,7    | 1,40 | 0,018009 | 0,373 | 213056_at   | FERM domain containing 4B                                      | <i>FRMD4B</i>   |
| 5170  | 21,1     | 15,1    | 1,40 | 0,039831 | 0,421 | 209446_s_at | Chromosome 7 open reading frame 44                             | <i>C7orf44</i>  |
| 120   | 5,60     | 4,01    | 1,40 | 0,000550 | 0,240 | 239605_x_at | Transforming growth factor, beta receptor 1                    | <i>TGFBRI</i>   |
| 690   | 111      | 79,1    | 1,40 | 0,003949 | 0,308 | 212946_at   | KIAA0564 protein                                               | <i>KIAA0564</i> |
| 6011  | 174      | 124     | 1,40 | 0,048880 | 0,445 | 214077_x_at | Meis homeobox 3 pseudogene 1                                   | <i>MEIS3P1</i>  |
| 251   | 78,9     | 56,5    | 1,40 | 0,001161 | 0,253 | 1556000_s_a | BTB (POZ) domain containing 7                                  | <i>BTBD7</i>    |
| 2806  | 20,7     | 14,8    | 1,40 | 0,019517 | 0,380 | 220638_s_at | Cas-Br-M (murine) ecotropic retroviral transforming sequence c | <i>CBLC</i>     |
| 4163  | 35,5     | 25,4    | 1,40 | 0,030772 | 0,404 | 217608_at   | P18SRP protein                                                 | <i>P18SRP</i>   |
| 1106  | 163      | 117     | 1,40 | 0,006469 | 0,319 | 225243_s_at | Sarcolemma associated protein                                  | <i>SLMAP</i>    |
| 2181  | 343      | 246     | 1,40 | 0,014427 | 0,361 | 204112_s_at | Histamine N-methyltransferase                                  | <i>HNMT</i>     |
| 5523  | 437      | 313     | 1,40 | 0,043808 | 0,433 | 201259_s_at | Synaptophysin-like 1                                           | <i>SYPL1</i>    |
| 2333  | 165      | 118     | 1,40 | 0,015567 | 0,364 | 229420_at   | cDNA FLJ37566 fis, clone BRCOC2002085                          | -               |
| 3185  | 88,5     | 63,5    | 1,39 | 0,022587 | 0,387 | 223261_at   | Polymerase (DNA directed) kappa                                | <i>POLK</i>     |
| 542   | 405      | 290     | 1,39 | 0,002907 | 0,293 | 203044_at   | Carbohydrate (chondroitin) synthase 1                          | <i>CHSY1</i>    |
| 4327  | 74,5     | 53,4    | 1,39 | 0,032204 | 0,407 | 221123_x_at | Zinc finger protein 395                                        | <i>ZNF395</i>   |
| 5949  | 17,3     | 12,4    | 1,39 | 0,048203 | 0,443 | 239449_at   | Ankylosis, progressive homolog (mouse)                         | <i>ANKH</i>     |
| 2526  | 91,4     | 65,6    | 1,39 | 0,017053 | 0,369 | 206854_s_at | Mitogen-activated protein kinase kinase kinase 7               | <i>MAP3K7</i>   |
| 3840  | 78,4     | 56,3    | 1,39 | 0,028045 | 0,399 | 223216_x_at | Huntington's disease gene regulatory region-binding protein 2  | <i>PBF</i>      |
| 1603  | 57,5     | 41,3    | 1,39 | 0,009994 | 0,341 | 202984_s_at | BCL2-associated athanogene 5                                   | <i>BAG5</i>     |
| 4531  | 181      | 130     | 1,39 | 0,034211 | 0,412 | 225093_at   | Utrophin                                                       | <i>UTRN</i>     |
| 1176  | 670      | 481     | 1,39 | 0,006912 | 0,321 | 208991_at   | Signal transducer and activator of transcription 3             | <i>STAT3</i>    |
| 3256  | 18,2     | 13,1    | 1,39 | 0,023114 | 0,388 | 242405_at   | Mastermind-like 2 (Drosophila)                                 | <i>MAML2</i>    |
| 501   | 47,8     | 34,3    | 1,39 | 0,002664 | 0,289 | 226267_at   | Jun dimerization protein 2                                     | <i>JDP2</i>     |
| 4057  | 15,7     | 11,3    | 1,39 | 0,029765 | 0,401 | 242384_at   | Cytoplasmic polyadenylation element binding protein 4          | <i>CPEB4</i>    |
| 1149  | 125      | 90,1    | 1,39 | 0,006758 | 0,321 | 204716_at   | Coiled-coil domain containing 6                                | <i>CCDC6</i>    |
| 5384  | 18,5     | 13,3    | 1,39 | 0,042241 | 0,429 | 222844_s_at | Serine racemase                                                | <i>SRR</i>      |
| 3164  | 70,8     | 50,9    | 1,39 | 0,022458 | 0,387 | 212398_at   | Radixin                                                        | <i>RDX</i>      |
| 3874  | 23,0     | 16,5    | 1,39 | 0,028290 | 0,399 | 231183_s_at | Jagged 1 (Alagille syndrome)                                   | <i>JAG1</i>     |
| 4754  | 315      | 226     | 1,39 | 0,036020 | 0,414 | 206662_at   | Glutaredoxin (thioltransferase)                                | <i>GLRX</i>     |
| 3413  | 60,7     | 43,7    | 1,39 | 0,024370 | 0,390 | 226682_at   | RAR-related orphan receptor A                                  | <i>RORA</i>     |
| 972   | 20,5     | 14,8    | 1,39 | 0,005641 | 0,315 | 205187_at   | SMAD family member 5                                           | <i>SMAD5</i>    |
| 3926  | 34,8     | 25,0    | 1,39 | 0,028702 | 0,399 | 211621_at   | Androgen receptor                                              | <i>AR</i>       |
| 2783  | 12,3     | 8,88    | 1,39 | 0,019334 | 0,380 | 240498_at   | Ets variant 6                                                  | <i>ETV6</i>     |
| 2836  | 15,9     | 11,4    | 1,39 | 0,019798 | 0,382 | 239173_at   | InaD-like (Drosophila)                                         | <i>INADL</i>    |
| 2396  | 132      | 95,1    | 1,39 | 0,015987 | 0,365 | 224950_at   | Prostaglandin F2 receptor negative regulator                   | <i>PTGFRN</i>   |
| 5359  | 786      | 566     | 1,39 | 0,042020 | 0,429 | 200897_s_at | Palladin, cytoskeletal associated protein                      | <i>PALLD</i>    |
| 2192  | 38,5     | 27,8    | 1,39 | 0,014508 | 0,361 | 224963_at   | Solute carrier family 26 (sulfate transporter), member 2       | <i>SLC26A2</i>  |
| 911   | 14,5     | 10,4    | 1,39 | 0,005250 | 0,313 | 241336_at   | Transcribed locus                                              | -               |

| Index | Mutated* | Normal* | FC   | P value  | FDR** | Probe set   | Description                                                          | Gene symbol         |
|-------|----------|---------|------|----------|-------|-------------|----------------------------------------------------------------------|---------------------|
| 1562  | 160      | 115     | 1,39 | 0,009692 | 0,339 | 203748_x_at | RNA binding motif, single stranded interacting protein 1             | <i>RBMS1</i>        |
| 805   | 507      | 365     | 1,39 | 0,004594 | 0,311 | 201260_s_at | Synaptophysin-like 1                                                 | <i>SYPL1</i>        |
| 5789  | 30,0     | 21,6    | 1,39 | 0,046653 | 0,441 | 235122_at   | Immunodeficiency virus type I enhancer binding protein 3             | <i>HIVEP3</i>       |
| 2540  | 78,1     | 56,3    | 1,39 | 0,017179 | 0,369 | 221045_s_at | Period homolog 3 (Drosophila)                                        | <i>PER3</i>         |
| 1682  | 123      | 88,5    | 1,39 | 0,010633 | 0,345 | 203774_at   | 5-methyltetrahydrofolate-homocysteine methyltransferase              | <i>MTR</i>          |
| 513   | 846      | 610     | 1,39 | 0,002737 | 0,291 | 200985_s_at | CD59 molecule, complement regulatory protein                         | <i>CD59</i>         |
| 4265  | 11,2     | 8,04    | 1,39 | 0,031737 | 0,406 | 1558447_at  | Hypothetical protein LOC100128439                                    | <i>LOC100128439</i> |
| 610   | 8,38     | 6,04    | 1,39 | 0,003449 | 0,308 | 241360_at   | Coiled-coil domain containing 15                                     | <i>CCDC15</i>       |
| 1668  | 9,33     | 6,72    | 1,39 | 0,010537 | 0,345 | 229110_at   | cDNA clone IMAGE:4794876                                             | -                   |
| 6071  | 18,3     | 13,2    | 1,39 | 0,049559 | 0,446 | 236696_at   | U2-associated SR140 protein                                          | <i>SR140</i>        |
| 4493  | 348      | 251     | 1,39 | 0,033779 | 0,411 | 202023_at   | Ephrin-A1                                                            | <i>EFNA1</i>        |
| 2781  | 205      | 148     | 1,39 | 0,019305 | 0,380 | 204142_at   | Enolase superfamily member 1                                         | <i>ENOSF1</i>       |
| 3649  | 12,2     | 8,79    | 1,39 | 0,026377 | 0,395 | 1556935_at  | Laminin, alpha 4                                                     | <i>LAMA4</i>        |
| 1427  | 96,8     | 69,8    | 1,39 | 0,008650 | 0,331 | 1558142_at  | Trinucleotide repeat containing 6B                                   | <i>TNRC6B</i>       |
| 628   | 164      | 118     | 1,39 | 0,003560 | 0,308 | 209106_at   | Nuclear receptor coactivator 1                                       | <i>NCOA1</i>        |
| 5034  | 169      | 122     | 1,39 | 0,038743 | 0,420 | 217739_s_at | Pre-B-cell colony enhancing factor 1                                 | <i>PBEF1</i>        |
| 2788  | 29,6     | 21,4    | 1,39 | 0,019385 | 0,380 | 228482_at   | CMT1A duplicated region transcript 4                                 | <i>CDRT4</i>        |
| 2895  | 26,0     | 18,8    | 1,39 | 0,020334 | 0,383 | 229541_at   | Homeobox containing 1                                                | <i>HMBOX1</i>       |
| 642   | 877      | 633     | 1,39 | 0,003657 | 0,308 | 201009_s_at | Thioredoxin interacting protein                                      | <i>TXNIP</i>        |
| 4514  | 28,4     | 20,5    | 1,38 | 0,034018 | 0,412 | 244310_at   | RAR-related orphan receptor A                                        | <i>RORA</i>         |
| 443   | 47,7     | 34,5    | 1,38 | 0,002360 | 0,288 | 213813_x_at | Ferritin, light polypeptide-like 1                                   | <i>FTL</i>          |
| 3016  | 57,3     | 41,4    | 1,38 | 0,021240 | 0,385 | 223540_at   | Poliovirus receptor-related 4                                        | <i>PVRL4</i>        |
| 4378  | 166      | 120     | 1,38 | 0,032564 | 0,407 | 202211_at   | ADP-ribosylation factor GTPase activating protein 3                  | <i>ARFGAP3</i>      |
| 4879  | 654      | 472     | 1,38 | 0,037272 | 0,418 | 200915_x_at | Kinectin 1 (kinesin receptor)                                        | <i>KTN1</i>         |
| 2542  | 213      | 154     | 1,38 | 0,017180 | 0,369 | 211015_s_at | Heat shock 70kDa protein 4                                           | <i>HSPA4</i>        |
| 4393  | 196      | 142     | 1,38 | 0,032723 | 0,407 | 201548_s_at | Jumonji, AT rich interactive domain 1B                               | <i>JARID1B</i>      |
| 4436  | 35,2     | 25,4    | 1,38 | 0,033216 | 0,409 | 233004_x_at | Nuclear factor I/A                                                   | <i>NFIA</i>         |
| 596   | 4,95     | 3,58    | 1,38 | 0,003281 | 0,301 | 240921_at   | -                                                                    | -                   |
| 3005  | 104      | 75,3    | 1,38 | 0,021154 | 0,385 | 222633_at   | Transducin (beta)-like 1X-linked receptor 1                          | <i>TBL1XR1</i>      |
| 4236  | 63,9     | 46,2    | 1,38 | 0,031397 | 0,405 | 219138_at   | Ribosomal protein L14                                                | <i>RPL14</i>        |
| 3088  | 48,4     | 35,0    | 1,38 | 0,021776 | 0,385 | 210224_at   | Major histocompatibility complex, class I-related                    | <i>MR1</i>          |
| 5942  | 185      | 134     | 1,38 | 0,048160 | 0,443 | 225640_at   | Hypothetical gene supported by AK091718                              | <i>LOC401504</i>    |
| 5624  | 8,13     | 5,88    | 1,38 | 0,044913 | 0,436 | 233720_at   | Sorbin and SH3 domain containing 2                                   | <i>SORBS2</i>       |
| 5267  | 22,1     | 16,0    | 1,38 | 0,040913 | 0,425 | 1569519_at  | Neuroblastoma breakpoint family, member 1                            | <i>NBPF1</i>        |
| 4723  | 548      | 397     | 1,38 | 0,035729 | 0,414 | 203216_s_at | Myosin VI                                                            | <i>MYO6</i>         |
| 3198  | 106      | 76,6    | 1,38 | 0,022652 | 0,387 | 230618_s_at | HLA-B associated transcript 2-like 2                                 | <i>BAT2L2</i>       |
| 3583  | 15,9     | 11,5    | 1,38 | 0,025869 | 0,394 | 1552309_a_a | Nexilin (F actin binding protein)                                    | <i>NEXN</i>         |
| 3332  | 31,4     | 22,7    | 1,38 | 0,023657 | 0,388 | 226765_at   | Spectrin, beta, non-erythrocytic 1                                   | <i>SPTBN1</i>       |
| 2605  | 354      | 257     | 1,38 | 0,017689 | 0,371 | 204131_s_at | Forkhead box O3                                                      | <i>FOXO3</i>        |
| 2970  | 8,04     | 5,82    | 1,38 | 0,020866 | 0,384 | 238317_x_at | RNA binding motif, single stranded interacting protein 1             | <i>RBMS1</i>        |
| 4135  | 134      | 96,9    | 1,38 | 0,030466 | 0,403 | 210621_s_at | RAS p21 protein activator (GTPase activating protein) 1              | <i>RASA1</i>        |
| 2720  | 140      | 102     | 1,38 | 0,018682 | 0,376 | 212798_s_at | Ankyrin repeat and MYND domain containing 2                          | <i>ANKMY2</i>       |
| 1744  | 29,6     | 21,5    | 1,38 | 0,011145 | 0,348 | 205415_s_at | Ataxin 3                                                             | <i>ATXN3</i>        |
| 2321  | 10,6     | 7,67    | 1,38 | 0,015417 | 0,363 | 230375_at   | Splicing factor, arginine/serine-rich 18                             | <i>SFRS18</i>       |
| 1563  | 14,5     | 10,5    | 1,38 | 0,009712 | 0,339 | 232710_at   | cDNA FLJ11415 fis, clone HEMBA1000942                                | -                   |
| 5546  | 26,5     | 19,3    | 1,38 | 0,044099 | 0,435 | 238311_at   | KIAA0776 protein                                                     | <i>KIAA0776</i>     |
| 2238  | 98,8     | 71,7    | 1,38 | 0,014878 | 0,363 | 222692_s_at | Fibronectin type III domain containing 3B                            | <i>FNDC3B</i>       |
| 1294  | 231      | 167     | 1,38 | 0,007702 | 0,325 | 204616_at   | Ubiquitin carboxyl-terminal esterase L3 (ubiquitin thiolesterase)    | <i>UCHL3</i>        |
| 3501  | 110      | 79,9    | 1,38 | 0,025158 | 0,392 | 218693_at   | Tetraspanin 15                                                       | <i>TSPAN15</i>      |
| 24    | 19,0     | 13,8    | 1,38 | 0,000100 | 0,201 | 205215_at   | Ring finger protein 2                                                | <i>RNF2</i>         |
| 600   | 154      | 112     | 1,38 | 0,003336 | 0,303 | 224827_at   | Ubiquitin domain containing 2                                        | <i>UBTD2</i>        |
| 2410  | 22,9     | 16,6    | 1,37 | 0,016102 | 0,365 | 229397_s_at | Glucocorticoid receptor DNA binding factor 1                         | <i>GRLF1</i>        |
| 218   | 11,9     | 8,67    | 1,37 | 0,000978 | 0,245 | 235567_at   | RAR-related orphan receptor A                                        | <i>RORA</i>         |
| 1806  | 56,2     | 40,9    | 1,37 | 0,011624 | 0,351 | 1555910_at  | Pentatricopeptide repeat domain 2                                    | <i>PTCD2</i>        |
| 2276  | 51,1     | 37,2    | 1,37 | 0,015132 | 0,363 | 231075_x_at | RAS association (RalGDS/AF-6) and pleckstrin homology domains 1      | <i>RAPH1</i>        |
| 1209  | 185      | 135     | 1,37 | 0,007164 | 0,324 | 209817_at   | Protein phosphatase 3 (formerly 2B), catalytic subunit, beta isoform | <i>PPP3CB</i>       |
| 5442  | 24,0     | 17,5    | 1,37 | 0,042909 | 0,431 | 205578_at   | Receptor tyrosine kinase-like orphan receptor 2                      | <i>ROR2</i>         |

| Index | Mutated* | Normal* | FC   | P value  | FDR** | Probe set   | Description                                                | Gene symbol      |
|-------|----------|---------|------|----------|-------|-------------|------------------------------------------------------------|------------------|
| 3421  | 23,0     | 16,7    | 1,37 | 0,024465 | 0,391 | 1555240_s_a | Guanine nucleotide binding protein (G protein), gamma 12   | <i>GNG12</i>     |
| 1895  | 256      | 186     | 1,37 | 0,012316 | 0,355 | 212410_at   | EF-hand domain family, member A1                           | <i>EFHA1</i>     |
| 4419  | 132      | 96,0    | 1,37 | 0,033065 | 0,409 | 212917_x_at | RecQ protein-like (DNA helicase Q1-like)                   | <i>RECQL</i>     |
| 5017  | 4,89     | 3,56    | 1,37 | 0,038592 | 0,420 | 238103_at   | CDNA FLJ37936 fis, clone CTONG2005468                      | -                |
| 4475  | 38,6     | 28,1    | 1,37 | 0,033648 | 0,411 | 234192_s_at | G kinase anchoring protein 1                               | <i>GKAP1</i>     |
| 1568  | 20,5     | 14,9    | 1,37 | 0,009751 | 0,340 | 1554004_a_a | Rho-guanine nucleotide exchange factor                     | <i>RGNEF</i>     |
| 656   | 116      | 84,5    | 1,37 | 0,003784 | 0,308 | 212936_at   | Family with sequence similarity 172, member A              | <i>C5orf21</i>   |
| 2754  | 138      | 100     | 1,37 | 0,019070 | 0,378 | 225674_at   | B-cell receptor-associated protein 29                      | <i>BCAP29</i>    |
| 4778  | 107      | 78,2    | 1,37 | 0,036230 | 0,414 | 204518_s_at | Peptidylprolyl isomerase C (cyclophilin C)                 | <i>PPIC</i>      |
| 5939  | 21,8     | 15,9    | 1,37 | 0,048147 | 0,443 | 1569142_at  | Tripartite motif-containing 13                             | <i>TRIM13</i>    |
| 2759  | 256      | 187     | 1,37 | 0,019144 | 0,379 | 225273_at   | WWC family member 3                                        | <i>WWC3</i>      |
| 2564  | 49,8     | 36,3    | 1,37 | 0,017391 | 0,371 | 227733_at   | Transmembrane protein 63C                                  | <i>TMEM63C</i>   |
| 750   | 117      | 85,4    | 1,37 | 0,004249 | 0,308 | 209647_s_at | Suppressor of cytokine signaling 5                         | <i>SOC55</i>     |
| 4800  | 20,2     | 14,7    | 1,37 | 0,036425 | 0,415 | 230102_at   | Ets variant gene 5 (ets-related molecule)                  | <i>ETV5</i>      |
| 2008  | 693      | 506     | 1,37 | 0,013093 | 0,355 | 212600_s_at | Ubiquinol-cytochrome c reductase core protein II           | <i>UQCRC2</i>    |
| 1097  | 208      | 152     | 1,37 | 0,006432 | 0,319 | 204690_at   | Syntaxin 8                                                 | <i>STX8</i>      |
| 4510  | 17,2     | 12,5    | 1,37 | 0,034001 | 0,412 | 242188_at   | Protein tyrosine phosphatase, receptor type, G             | <i>PTPRG</i>     |
| 636   | 7,59     | 5,54    | 1,37 | 0,003619 | 0,308 | 231109_at   | CUG triplet repeat, RNA binding protein 2                  | <i>CUGBP2</i>    |
| 4277  | 26,9     | 19,6    | 1,37 | 0,031784 | 0,406 | 237383_at   | Transcribed locus                                          | -                |
| 2601  | 25,3     | 18,4    | 1,37 | 0,017665 | 0,371 | 214493_s_at | InaD-like (Drosophila)                                     | <i>INADL</i>     |
| 4303  | 24,4     | 17,8    | 1,37 | 0,032033 | 0,407 | 1554919_s_a | Chromosome 7 open reading frame 63                         | <i>C7orf63</i>   |
| 4025  | 38,5     | 28,1    | 1,37 | 0,029474 | 0,400 | 203836_s_at | Mitogen-activated protein kinase kinase kinase 5           | <i>MAP3K5</i>    |
| 2252  | 32,0     | 23,4    | 1,37 | 0,014997 | 0,363 | 236754_at   | Protein phosphatase 1, regulatory (inhibitor) subunit 2    | <i>PPP1R2</i>    |
| 333   | 307      | 225     | 1,37 | 0,001675 | 0,274 | 202808_at   | Chromosome 10 open reading frame 26                        | <i>C10orf26</i>  |
| 4121  | 30,5     | 22,3    | 1,37 | 0,030300 | 0,402 | 205395_s_at | MRE11 meiotic recombination 11 homolog A (S. cerevisiae)   | <i>MRE11A</i>    |
| 5320  | 423      | 309     | 1,37 | 0,041550 | 0,427 | 217869_at   | Hydroxysteroid (17-beta) dehydrogenase 12                  | <i>HSD17B12</i>  |
| 1136  | 60,8     | 44,5    | 1,37 | 0,006643 | 0,319 | 226787_at   | Zinc finger protein 18                                     | <i>ZNF18</i>     |
| 3265  | 156      | 114     | 1,37 | 0,023193 | 0,388 | 218594_at   | HEAT repeat containing 1                                   | <i>HEATR1</i>    |
| 5827  | 30,2     | 22,0    | 1,37 | 0,047078 | 0,442 | 222858_s_at | Dual adaptor of phosphotyrosine and 3-phosphoinositides    | <i>DAPP1</i>     |
| 4001  | 113      | 82,6    | 1,37 | 0,029287 | 0,400 | 221763_at   | Jumonji domain containing 1C                               | <i>JMJD1C</i>    |
| 5244  | 159      | 116     | 1,37 | 0,040599 | 0,423 | 212397_at   | Radixin                                                    | <i>RDX</i>       |
| 4425  | 18,7     | 13,7    | 1,37 | 0,033119 | 0,409 | 244464_at   | Ubiquitin-conjugating enzyme E2E 2 (UBC4/5 homolog, yeast) | <i>UBE2E2</i>    |
| 2053  | 14,4     | 10,5    | 1,37 | 0,013345 | 0,355 | 242243_at   | TATA element modulatory factor 1                           | <i>TMF1</i>      |
| 3940  | 92,2     | 67,5    | 1,37 | 0,028764 | 0,399 | 219757_s_at | Chromosome 14 open reading frame 101                       | <i>C14orf101</i> |
| 3295  | 203      | 149     | 1,37 | 0,023478 | 0,388 | 212420_at   | E74-like factor 1 (ets domain transcription factor)        | <i>ELF1</i>      |
| 3157  | 31,6     | 23,1    | 1,37 | 0,022409 | 0,387 | 204225_at   | Histone deacetylase 4                                      | <i>HDAC4</i>     |
| 3310  | 42,9     | 31,4    | 1,37 | 0,023546 | 0,388 | 238476_at   | Adult retina protein                                       | <i>C5orf41</i>   |
| 1984  | 27,4     | 20,1    | 1,37 | 0,012953 | 0,355 | 215239_x_at | Zinc finger protein 273                                    | <i>ZNF273</i>    |
| 5934  | 6,53     | 4,78    | 1,37 | 0,048111 | 0,443 | 241708_at   | Dedicator of cytokinesis 1                                 | <i>DOCK1</i>     |
| 1101  | 97,1     | 71,1    | 1,37 | 0,006456 | 0,319 | 1557370_s_a | MYC binding protein 2                                      | <i>MYCBP2</i>    |
| 5386  | 39,2     | 28,7    | 1,37 | 0,042245 | 0,429 | 226380_at   | Protein tyrosine phosphatase, non-receptor type 21         | <i>PTPN21</i>    |
| 5136  | 412      | 302     | 1,37 | 0,039515 | 0,421 | 200883_at   | Ubiquinol-cytochrome c reductase core protein II           | <i>UQCRC2</i>    |
| 5428  | 12,4     | 9,11    | 1,37 | 0,042706 | 0,430 | 1554741_s_a | Fibroblast growth factor 7 (keratinocyte growth factor)    | <i>FGF7</i>      |
| 4147  | 45,9     | 33,7    | 1,37 | 0,030601 | 0,403 | 228251_at   | UBX domain containing 1                                    | <i>UBXD1</i>     |
| 1387  | 258      | 189     | 1,36 | 0,008348 | 0,329 | 217858_s_at | Armadillo repeat containing, X-linked 3                    | <i>ARMCX3</i>    |
| 2272  | 11,1     | 8,17    | 1,36 | 0,015090 | 0,363 | 1558184_s_a | Zinc finger protein 17                                     | <i>ZNF17</i>     |
| 1460  | 96,0     | 70,4    | 1,36 | 0,008919 | 0,334 | 204703_at   | Intraflagellar transport 88 homolog (Chlamydomonas)        | <i>IFT88</i>     |
| 4159  | 72,9     | 53,5    | 1,36 | 0,030734 | 0,404 | 211944_at   | BAT2 domain containing 1                                   | <i>BAT2D1</i>    |
| 2174  | 61,0     | 44,8    | 1,36 | 0,014364 | 0,361 | 226203_at   | cDNA clone IMAGE:5299888                                   | -                |
| 5582  | 121      | 88,8    | 1,36 | 0,044509 | 0,436 | 206695_x_at | Zinc finger protein 43                                     | <i>ZNF43</i>     |
| 5116  | 49,3     | 36,2    | 1,36 | 0,039390 | 0,421 | 227405_s_at | Frizzled homolog 8 (Drosophila)                            | <i>FZD8</i>      |
| 3582  | 63,8     | 46,9    | 1,36 | 0,025868 | 0,394 | 216905_s_at | Suppression of tumorigenicity 14 (colon carcinoma)         | <i>ST14</i>      |
| 2652  | 20,8     | 15,3    | 1,36 | 0,018082 | 0,373 | 227987_at   | Vacuolar protein sorting 13 homolog A (S. cerevisiae)      | <i>VPS13A</i>    |
| 60    | 504      | 370     | 1,36 | 0,000226 | 0,201 | 224837_at   | Forkhead box P1                                            | <i>FOXP1</i>     |
| 5701  | 39,3     | 28,8    | 1,36 | 0,045646 | 0,438 | 209119_x_at | Nuclear receptor subfamily 2, group F, member 2            | <i>NR2F2</i>     |
| 667   | 24,2     | 17,8    | 1,36 | 0,003838 | 0,308 | 244813_at   | RAD51-like 1 (S. cerevisiae)                               | <i>RAD51L1</i>   |
| 6094  | 220      | 161     | 1,36 | 0,049743 | 0,446 | 209444_at   | RAP1, GTP-GDP dissociation stimulator 1                    | <i>RAP1GDS1</i>  |

| Index | Mutated* | Normal* | FC   | P value  | FDR** | Probe set   | Description                                                          | Gene symbol     |
|-------|----------|---------|------|----------|-------|-------------|----------------------------------------------------------------------|-----------------|
| 4939  | 60,7     | 44,6    | 1,36 | 0,037891 | 0,419 | 241425_at   | Nucleoporin like 1                                                   | <i>NUPL1</i>    |
| 4818  | 211      | 155     | 1,36 | 0,036618 | 0,416 | 212423_at   | Zinc finger, CCHC domain containing 24                               | <i>ZCCHC24</i>  |
| 3505  | 58,8     | 43,2    | 1,36 | 0,025182 | 0,392 | 242669_at   | Ubiquitin-fold modifier 1                                            | <i>UFM1</i>     |
| 3029  | 66,7     | 49,0    | 1,36 | 0,021321 | 0,385 | 204635_at   | Ribosomal protein S6 kinase, 90kDa, polypeptide 5                    | <i>RPS6KA5</i>  |
| 447   | 29,5     | 21,7    | 1,36 | 0,002391 | 0,288 | 221555_x_at | CDC14 cell division cycle 14 homolog B ( <i>S. cerevisiae</i> )      | <i>CDC14B</i>   |
| 4245  | 14,1     | 10,4    | 1,36 | 0,031505 | 0,406 | 205222_at   | L-3-hydroxyacyl-CoA dehydrogenase                                    | <i>EHHADH</i>   |
| 5360  | 9,21     | 6,78    | 1,36 | 0,042032 | 0,429 | 243041_s_at | RNA binding motif, single stranded interacting protein               | <i>RBMS3</i>    |
| 1874  | 29,3     | 21,6    | 1,36 | 0,012125 | 0,354 | 242878_at   | -                                                                    | -               |
| 4558  | 30,0     | 22,1    | 1,36 | 0,034449 | 0,412 | 229654_at   | Zinc finger protein 44                                               | <i>ZNF44</i>    |
| 1532  | 141      | 104     | 1,36 | 0,009477 | 0,337 | 221787_at   | Chromosome 6 open reading frame 120                                  | <i>C6orf120</i> |
| 3965  | 42,0     | 30,9    | 1,36 | 0,028965 | 0,399 | 230886_at   | Transcribed locus                                                    | -               |
| 88    | 11,8     | 8,65    | 1,36 | 0,000330 | 0,201 | 236849_at   | Vesicle transport through interaction with t-SNAREs homolog 1A       | <i>VT11A</i>    |
| 3132  | 39,2     | 28,9    | 1,36 | 0,022214 | 0,387 | 33494_at    | Electron-transferring-flavoprotein dehydrogenase                     | <i>ETFDH</i>    |
| 4790  | 35,7     | 26,3    | 1,36 | 0,036330 | 0,415 | 202669_s_at | Ephrin-B2                                                            | <i>EFNB2</i>    |
| 317   | 236      | 174     | 1,36 | 0,001588 | 0,272 | 203704_s_at | RAS responsive element binding protein 1                             | <i>RREB1</i>    |
| 5952  | 20,4     | 15,0    | 1,36 | 0,048288 | 0,444 | 220840_s_at | Chromosome 1 open reading frame 112                                  | <i>C1orf112</i> |
| 688   | 35,9     | 26,5    | 1,36 | 0,003940 | 0,308 | 208876_s_at | p21 (CDKN1A)-activated kinase 2                                      | <i>PAK2</i>     |
| 2682  | 21,3     | 15,7    | 1,36 | 0,018363 | 0,374 | 242722_at   | LIM domain 7                                                         | <i>LMO7</i>     |
| 798   | 12,0     | 8,87    | 1,36 | 0,004555 | 0,311 | 243469_at   | E74-like factor 2 (ets domain transcription factor)                  | <i>ELF2</i>     |
| 3478  | 6,79     | 5,00    | 1,36 | 0,024976 | 0,392 | 240866_at   | LIM domain containing preferred translocation partner in lipoma      | <i>LPP</i>      |
| 1214  | 29,9     | 22,0    | 1,36 | 0,007213 | 0,324 | 243772_at   | Serologically defined colon cancer antigen 8                         | <i>SDCCAG8</i>  |
| 789   | 43,9     | 32,4    | 1,36 | 0,004507 | 0,311 | 1554003_at  | Rho-guanine nucleotide exchange factor                               | <i>RGNEF</i>    |
| 3221  | 5,28     | 3,89    | 1,36 | 0,022830 | 0,387 | 239370_at   | cDNA clone ZE01A04                                                   | -               |
| 4855  | 22,4     | 16,5    | 1,36 | 0,037023 | 0,417 | 242431_at   | Ubiquitin-conjugating enzyme E2-binding protein 1                    | <i>ARIH1</i>    |
| 2485  | 56,8     | 41,9    | 1,36 | 0,016748 | 0,367 | 209105_at   | Nuclear receptor coactivator 1                                       | <i>NCOA1</i>    |
| 2033  | 82,9     | 61,1    | 1,36 | 0,013238 | 0,355 | 201746_at   | Tumor protein p53 (Li-Fraumeni syndrome)                             | <i>TP53</i>     |
| 3111  | 415      | 306     | 1,36 | 0,021974 | 0,386 | 202743_at   | Phosphoinositide-3-kinase, regulatory subunit 3 (p55, gamma)         | <i>PIK3R3</i>   |
| 3605  | 26,9     | 19,8    | 1,36 | 0,026000 | 0,394 | 233977_at   | Growth regulation by estrogen in breast cancer-like                  | <i>KIAA1772</i> |
| 2465  | 136      | 100     | 1,36 | 0,016563 | 0,367 | 218379_at   | RNA binding motif protein 7                                          | <i>RBM7</i>     |
| 5161  | 69,2     | 51,0    | 1,36 | 0,039739 | 0,421 | 207606_s_at | Rho GTPase activating protein 12                                     | <i>ARHGAP12</i> |
| 773   | 139      | 103     | 1,36 | 0,004427 | 0,311 | 202305_s_at | Fasciculation and elongation protein zeta 2 (zygin II)               | <i>FEZ2</i>     |
| 239   | 162      | 119     | 1,36 | 0,001109 | 0,250 | 203614_at   | UTP14, U3 small nucleolar ribonucleoprotein, homolog C (yeast)       | <i>UTP14C</i>   |
| 4390  | 87,1     | 64,3    | 1,36 | 0,032708 | 0,407 | 1569057_s_a | Melanoma inhibitory activity family, member 3                        | <i>MIA3</i>     |
| 617   | 14,3     | 10,6    | 1,36 | 0,003494 | 0,308 | 241709_s_at | Dedicator of cytokinesis 1                                           | <i>DOCK1</i>    |
| 5599  | 63,4     | 46,8    | 1,35 | 0,044658 | 0,436 | 221946_at   | Chromosome 9 open reading frame 116                                  | <i>C9orf116</i> |
| 1488  | 138      | 102     | 1,35 | 0,009179 | 0,336 | 233952_s_at | Zinc finger protein 295                                              | <i>ZNF295</i>   |
| 4219  | 26,3     | 19,4    | 1,35 | 0,031255 | 0,405 | 231403_at   | Triple functional domain (PTPRF interacting)                         | <i>TRIO</i>     |
| 4627  | 21,7     | 16,1    | 1,35 | 0,034900 | 0,412 | 213623_at   | Kinesin family member 3A                                             | <i>KIF3A</i>    |
| 865   | 309      | 228     | 1,35 | 0,004995 | 0,313 | 218229_s_at | Pogo transposable element with KRAB domain                           | <i>POGK</i>     |
| 4290  | 558      | 412     | 1,35 | 0,031890 | 0,406 | 202351_at   | Vitronectin receptor subunit alpha (antigen CD51)                    | <i>ITGAV</i>    |
| 1905  | 130      | 96,3    | 1,35 | 0,012386 | 0,355 | 201918_at   | Solute carrier family 25, member 36                                  | <i>SLC25A36</i> |
| 2854  | 11,9     | 8,76    | 1,35 | 0,020010 | 0,383 | 232110_at   | Polypeptide N-acetylgalactosaminyltransferase 5                      | <i>GALNT5</i>   |
| 4200  | 12,1     | 8,93    | 1,35 | 0,031059 | 0,404 | 233087_at   | F-box and leucine-rich repeat protein 17                             | <i>FBXL17</i>   |
| 3455  | 66,4     | 49,1    | 1,35 | 0,024747 | 0,392 | 212858_at   | Progesterin and adipoQ receptor family member IV                     | <i>PAQR4</i>    |
| 5883  | 150      | 111     | 1,35 | 0,047590 | 0,442 | 201325_s_at | Epithelial membrane protein 1                                        | <i>EMP1</i>     |
| 2304  | 72,5     | 53,6    | 1,35 | 0,015297 | 0,363 | 233936_s_at | Gametogenetin binding protein 2                                      | <i>GGNBP2</i>   |
| 2480  | 98,6     | 73,0    | 1,35 | 0,016719 | 0,367 | 227413_at   | Ubiquitin-like domain containing CTD phosphatase 1                   | <i>UBLCP1</i>   |
| 3273  | 78,5     | 58,1    | 1,35 | 0,023279 | 0,388 | 1554351_a_a | TIP41, TOR signaling pathway regulator-like ( <i>S. cerevisiae</i> ) | <i>TIPRL</i>    |
| 2985  | 45,0     | 33,3    | 1,35 | 0,020986 | 0,384 | 214175_x_at | PDZ and LIM domain 4                                                 | <i>PDLIM4</i>   |
| 623   | 84,1     | 62,3    | 1,35 | 0,003529 | 0,308 | 229009_at   | SIX homeobox 5                                                       | <i>SIX5</i>     |
| 1463  | 9,71     | 7,19    | 1,35 | 0,008945 | 0,334 | 1569796_s_a | Attractin-like 1                                                     | <i>ATRNL1</i>   |
| 6114  | 407      | 301     | 1,35 | 0,049896 | 0,446 | 201876_at   | Paraoxonase 2                                                        | <i>PON2</i>     |
| 1786  | 256      | 189     | 1,35 | 0,011410 | 0,349 | 209579_s_at | Methyl-CpG binding domain protein 4                                  | <i>MBD4</i>     |
| 5600  | 106      | 78,6    | 1,35 | 0,044661 | 0,436 | 213025_at   | THUMP domain containing 1                                            | <i>THUMPD1</i>  |
| 5173  | 84,2     | 62,4    | 1,35 | 0,039846 | 0,421 | 226647_at   | Transmembrane protein 25                                             | <i>TMEM25</i>   |
| 2358  | 9,54     | 7,07    | 1,35 | 0,015729 | 0,364 | 216147_at   | Septin 11                                                            | <i>SEPT11</i>   |
| 2122  | 19,6     | 14,6    | 1,35 | 0,013955 | 0,359 | 207950_s_at | Ankyrin 3, node of Ranvier (ankyrin G)                               | <i>ANK3</i>     |

| Index | Mutated* | Normal* | FC   | P value  | FDR** | Probe set   | Description                                                       | Gene symbol     |
|-------|----------|---------|------|----------|-------|-------------|-------------------------------------------------------------------|-----------------|
| 4721  | 96,1     | 71,3    | 1,35 | 0,035710 | 0,413 | 226541_at   | F-box protein 30                                                  | <i>FBXO30</i>   |
| 1300  | 471      | 349     | 1,35 | 0,007742 | 0,325 | 200984_s_at | CD59 molecule, complement regulatory protein                      | <i>CD59</i>     |
| 1086  | 220      | 163     | 1,35 | 0,006364 | 0,319 | 209107_x_at | Nuclear receptor coactivator 1                                    | <i>NCOA1</i>    |
| 2328  | 163      | 121     | 1,35 | 0,015505 | 0,364 | 226247_at   | Pleckstrin homology domain containing, family A member 1          | <i>PLEKHA1</i>  |
| 3595  | 21,0     | 15,6    | 1,35 | 0,025928 | 0,394 | 222354_at   | F11 receptor                                                      | <i>FR11</i>     |
| 4848  | 54,7     | 40,6    | 1,35 | 0,036936 | 0,417 | 229173_at   | KIAA1715 protein                                                  | <i>KIAA1715</i> |
| 2586  | 217      | 161     | 1,35 | 0,017543 | 0,371 | 224955_at   | TEA domain family member 1 (SV40 transcriptional enhancer factor) | <i>TEAD1</i>    |
| 2420  | 7,43     | 5,52    | 1,35 | 0,016179 | 0,365 | 1553672_at  | Enabled homolog (Drosophila)                                      | <i>ENAH</i>     |
| 5114  | 24,5     | 18,2    | 1,35 | 0,039378 | 0,421 | 220918_at   | Chromosome 21 open reading frame 96                               | <i>C21orf96</i> |
| 2644  | 42,7     | 31,7    | 1,35 | 0,018026 | 0,373 | 218006_s_at | Zinc finger protein 22 (KOX 15)                                   | <i>ZNF22</i>    |
| 3670  | 13,0     | 9,64    | 1,35 | 0,026522 | 0,395 | 233224_at   | Karyopherin alpha 3 (importin alpha 4)                            | <i>KPNA3</i>    |
| 3755  | 23,7     | 17,6    | 1,34 | 0,027293 | 0,397 | 218833_at   | sterile alpha motif and leucine zipper containing kinase AZK      | <i>ZAK</i>      |
| 930   | 25,0     | 18,6    | 1,34 | 0,005346 | 0,313 | 223713_at   | Radial spoke head 3 homolog (Chlamydomonas)                       | <i>RSPH3</i>    |
| 2608  | 185      | 138     | 1,34 | 0,017707 | 0,371 | 203173_s_at | Esophageal cancer associated protein                              | <i>MGC16824</i> |
| 4214  | 190      | 141     | 1,34 | 0,031226 | 0,405 | 201910_at   | FERM, RhoGEF (ARHGEF) and pleckstrin domain protein 1             | <i>FARP1</i>    |
| 4653  | 54,4     | 40,5    | 1,34 | 0,035147 | 0,413 | 206240_s_at | Zinc finger protein 136                                           | <i>ZNF136</i>   |
| 473   | 106      | 78,9    | 1,34 | 0,002514 | 0,289 | 1553103_at  | Nuclear transcription factor, X-box binding 1                     | <i>NFX1</i>     |
| 4139  | 111      | 82,5    | 1,34 | 0,030549 | 0,403 | 217952_x_at | PHD finger protein 3                                              | <i>PHF3</i>     |
| 3243  | 82,9     | 61,7    | 1,34 | 0,022996 | 0,388 | 205405_at   | Semaphorin 5A                                                     | <i>SEMA5A</i>   |
| 3398  | 605      | 451     | 1,34 | 0,024247 | 0,390 | 202442_at   | Adaptor-related protein complex 3, sigma 1 subunit                | <i>AP3S1</i>    |
| 1593  | 2123     | 1581    | 1,34 | 0,009902 | 0,340 | 215001_s_at | Glutamate-ammonia ligase (glutamine synthetase)                   | <i>GLUL</i>     |
| 2027  | 435      | 324     | 1,34 | 0,013216 | 0,355 | 208992_s_at | Signal transducer and activator of transcription 3                | <i>STAT3</i>    |
| 3484  | 268      | 200     | 1,34 | 0,025016 | 0,392 | 200842_s_at | Glutamyl-prolyl-tRNA synthetase                                   | <i>EPRS</i>     |
| 4810  | 38,9     | 29,0    | 1,34 | 0,036541 | 0,415 | 218766_s_at | Tryptophanyl tRNA synthetase 2, mitochondrial                     | <i>WARS2</i>    |
| 4762  | 221      | 165     | 1,34 | 0,036100 | 0,414 | 211948_x_at | BAT2 domain containing 1                                          | <i>BAT2D1</i>   |
| 3254  | 178      | 133     | 1,34 | 0,023110 | 0,388 | 202180_s_at | Major vault protein                                               | <i>MVP</i>      |
| 582   | 205      | 153     | 1,34 | 0,003194 | 0,300 | 212742_at   | Zinc finger protein 364                                           | <i>ZNF364</i>   |
| 4699  | 10,1     | 7,57    | 1,34 | 0,035478 | 0,413 | 222180_at   | v-yes-1 Yamaguchi sarcoma viral oncogene homolog 1                | <i>YES1</i>     |
| 3257  | 73,2     | 54,6    | 1,34 | 0,023129 | 0,388 | 201083_s_at | BCL2-associated transcription factor 1                            | <i>BCLAF1</i>   |
| 2508  | 144      | 108     | 1,34 | 0,016854 | 0,367 | 203238_s_at | Notch homolog 3 (Drosophila)                                      | <i>NOTCH3</i>   |
| 1383  | 49,5     | 36,9    | 1,34 | 0,008328 | 0,329 | 227438_at   | Alpha-kinase 1                                                    | <i>ALPK1</i>    |
| 360   | 55,7     | 41,5    | 1,34 | 0,001852 | 0,281 | 219362_at   | MAK10 homolog, amino-acid N-acetyltransferase subunit, (S.        | <i>MAK10</i>    |
| 2176  | 28,9     | 21,5    | 1,34 | 0,014396 | 0,361 | 1568594_s_a | Tripartite motif-containing 52                                    | <i>TRIM52</i>   |
| 5472  | 7,55     | 5,63    | 1,34 | 0,043265 | 0,432 | 214524_at   | Growth hormone releasing hormone                                  | <i>GHRH</i>     |
| 3943  | 139      | 104     | 1,34 | 0,028790 | 0,399 | 221761_at   | Adenylosuccinate synthase                                         | <i>ADSS</i>     |
| 4459  | 13,3     | 9,95    | 1,34 | 0,033508 | 0,411 | 236704_at   | Phosphodiesterase 4D interacting protein                          | <i>PDE4DIP</i>  |
| 1564  | 50,8     | 37,9    | 1,34 | 0,009715 | 0,339 | 221496_s_at | Transducer of ERBB2, 2                                            | <i>TOB2</i>     |
| 5315  | 6,67     | 4,98    | 1,34 | 0,041471 | 0,427 | 207120_at   | Zinc finger protein 667                                           | <i>ZNF667</i>   |
| 2701  | 11,9     | 8,91    | 1,34 | 0,018527 | 0,375 | 1558815_at  | Sorbin and SH3 domain containing 2                                | <i>SORBS2</i>   |
| 5371  | 58,1     | 43,4    | 1,34 | 0,042156 | 0,429 | 201888_s_at | Interleukin 13 receptor, alpha 1                                  | <i>IL13RA1</i>  |
| 662   | 9,18     | 6,86    | 1,34 | 0,003823 | 0,308 | 1556235_at  | cDNA FLJ34369 fis, clone FEBRA2017098                             | -               |
| 2171  | 186      | 139     | 1,34 | 0,014359 | 0,361 | 221664_s_at | F11 receptor                                                      | <i>F11R</i>     |
| 1808  | 445      | 333     | 1,34 | 0,011663 | 0,351 | 201413_at   | Hydroxysteroid (17-beta) dehydrogenase 4                          | <i>HSD17B4</i>  |
| 3720  | 83,0     | 62,0    | 1,34 | 0,027005 | 0,397 | 219156_at   | synaptojanin 2 binding protein                                    | <i>SYNJ2BP</i>  |
| 3931  | 87,3     | 65,2    | 1,34 | 0,028738 | 0,399 | 206829_x_at | Zinc finger protein 430                                           | <i>ZNF430</i>   |
| 5020  | 28,4     | 21,2    | 1,34 | 0,038621 | 0,420 | 223730_at   | Glypican 6                                                        | <i>GPC6</i>     |
| 4715  | 1502     | 1123    | 1,34 | 0,035668 | 0,413 | 201666_at   | TIMP metalloproteinase inhibitor 1                                | <i>TIMP1</i>    |
| 4621  | 46,9     | 35,1    | 1,34 | 0,034870 | 0,412 | 202516_s_at | Discs, large homolog 1 (Drosophila)                               | <i>DLG1</i>     |
| 4264  | 14,3     | 10,7    | 1,34 | 0,031728 | 0,406 | 236983_at   | Transmembrane channel-like 5                                      | <i>TMCS</i>     |
| 4698  | 226      | 169     | 1,34 | 0,035476 | 0,413 | 202656_s_at | SERTA domain containing 2                                         | <i>SERTAD2</i>  |
| 2022  | 523      | 391     | 1,34 | 0,013188 | 0,355 | 224891_at   | Forkhead box O3                                                   | <i>FOXO3</i>    |
| 2602  | 27,2     | 20,3    | 1,34 | 0,017666 | 0,371 | 212027_at   | RNA binding motif protein 25                                      | <i>RBM25</i>    |
| 6098  | 207      | 155     | 1,34 | 0,049784 | 0,446 | 223272_s_at | Chromosome 1 open reading frame 57                                | <i>C1orf57</i>  |
| 4477  | 242      | 181     | 1,34 | 0,033671 | 0,411 | 223223_at   | ARV1 homolog (S. cerevisiae)                                      | <i>ARV1</i>     |
| 6069  | 28,2     | 21,1    | 1,34 | 0,049529 | 0,446 | 243759_at   | Splicing factor, arginine/serine-rich 15                          | <i>SFRS15</i>   |
| 620   | 16,2     | 12,1    | 1,34 | 0,003506 | 0,308 | 232206_at   | Unc-51-like kinase 4 (C. elegans)                                 | <i>ULK4</i>     |
| 2362  | 61,9     | 46,4    | 1,34 | 0,015765 | 0,364 | 206554_x_at | SET domain and mariner transposase fusion gene                    | <i>SETMAR</i>   |



| Index | Mutated* | Normal* | FC   | P value  | FDR** | Probe set   | Description                                                  | Gene symbol |
|-------|----------|---------|------|----------|-------|-------------|--------------------------------------------------------------|-------------|
| 4060  | 83,6     | 62,6    | 1,34 | 0,029796 | 0,401 | 229810_at   | Transcribed locus                                            | -           |
| 2189  | 39,4     | 29,5    | 1,34 | 0,014493 | 0,361 | 213494_s_at | YY1 transcription factor                                     | YY1         |
| 2223  | 77,6     | 58,1    | 1,34 | 0,014765 | 0,363 | 240044_x_at | Trinucleotide repeat containing 6B                           | TNRC6B      |
| 4626  | 6,06     | 4,54    | 1,34 | 0,034891 | 0,412 | 235547_at   | NEDD4 binding protein 2-like 2                               | N4BP2L2     |
| 3473  | 84,8     | 63,5    | 1,34 | 0,024915 | 0,392 | 214264_s_at | Chromosome 14 open reading frame 143                         | C14orf143   |
| 1197  | 34,4     | 25,7    | 1,33 | 0,007066 | 0,323 | 204180_s_at | Zinc finger and BTB domain containing 43                     | ZBTB43      |
| 1157  | 182      | 137     | 1,33 | 0,006801 | 0,321 | 224857_s_at | Polymerase (RNA) I polypeptide D, 16kDa                      | POLR1D      |
| 1212  | 305      | 228     | 1,33 | 0,007185 | 0,324 | 201133_s_at | Praja 2, RING-H2 motif containing                            | PJA2        |
| 281   | 93,4     | 70,0    | 1,33 | 0,001372 | 0,263 | 54632_at    | Thyroid adenoma associated                                   | THADA       |
| 4820  | 136      | 102     | 1,33 | 0,036650 | 0,416 | 202052_s_at | Retinoic acid induced 14                                     | RAI14       |
| 4026  | 208      | 156     | 1,33 | 0,029485 | 0,400 | 214693_x_at | Neuroblastoma breakpoint family, member 14                   | NBPF14      |
| 2097  | 30,6     | 22,9    | 1,33 | 0,013739 | 0,358 | 232097_at   | TOX high mobility group box family member 4                  | TOX4        |
| 6000  | 49,1     | 36,8    | 1,33 | 0,048771 | 0,444 | 216835_s_at | Docking protein 1, 62kDa (downstream of tyrosine kinase 1)   | DOK1        |
| 2874  | 52,8     | 39,6    | 1,33 | 0,020184 | 0,383 | 207688_s_at | Inhibin, beta C                                              | INHBC       |
| 4127  | 49,9     | 37,4    | 1,33 | 0,030364 | 0,402 | 235938_at   | Transcribed locus                                            | -           |
| 4366  | 114      | 85,5    | 1,33 | 0,032479 | 0,407 | 213341_at   | Fem-1 homolog c (C. elegans)                                 | FEM1C       |
| 3385  | 131      | 98,4    | 1,33 | 0,024097 | 0,389 | 218578_at   | Hyperparathyroidism 2 protein                                | CDC73       |
| 1576  | 23,2     | 17,4    | 1,33 | 0,009792 | 0,340 | 206429_at   | Coagulation factor II (thrombin) receptor-like 1             | F2RL1       |
| 3524  | 11,9     | 8,96    | 1,33 | 0,025289 | 0,392 | 210365_at   | Runt-related transcription factor 1 (aml1 oncogene)          | RUNX1       |
| 5571  | 99,3     | 74,5    | 1,33 | 0,044377 | 0,435 | 217985_s_at | Bromodomain adjacent to zinc finger domain, 1A               | BAZ1A       |
| 5667  | 212      | 159     | 1,33 | 0,045223 | 0,436 | 214305_s_at | Splicing factor 3b, subunit 1, 155kDa                        | SF3B1       |
| 2017  | 36,0     | 27,0    | 1,33 | 0,013160 | 0,355 | 202972_s_at | Family with sequence similarity 13, member A1                | FAM13A1     |
| 1624  | 318      | 239     | 1,33 | 0,010206 | 0,344 | 212463_at   | CD59 molecule, complement regulatory protein                 | CD59        |
| 1005  | 520      | 391     | 1,33 | 0,005813 | 0,316 | 201251_at   | Pyruvate kinase, muscle                                      | PKM2        |
| 2183  | 105      | 78,6    | 1,33 | 0,014447 | 0,361 | 222754_at   | tRNA nucleotidyl transferase, CCA-adding, 1                  | TRNT1       |
| 5305  | 1046     | 786     | 1,33 | 0,041390 | 0,426 | 201403_s_at | Microsomal glutathione S-transferase 3                       | MGST3       |
| 4047  | 69,0     | 51,8    | 1,33 | 0,029663 | 0,401 | 221277_s_at | Pseudouridylate synthase 3                                   | PUS3        |
| 442   | 335      | 252     | 1,33 | 0,002345 | 0,288 | 214170_x_at | Fumarate hydratase                                           | FH          |
| 3949  | 69,1     | 52,0    | 1,33 | 0,028839 | 0,399 | 1559038_at  | Septin 2                                                     | SEPT2       |
| 357   | 83,5     | 62,8    | 1,33 | 0,001832 | 0,280 | 225757_s_at | Calmin (calponin-like, transmembrane)                        | CLMN        |
| 1884  | 4,78     | 3,59    | 1,33 | 0,012232 | 0,355 | 242033_at   | Ring finger protein 180                                      | RNF180      |
| 420   | 203      | 152     | 1,33 | 0,002205 | 0,286 | 218198_at   | DEAH (Asp-Glu-Ala-His) box polypeptide 32                    | DHX32       |
| 1015  | 225      | 169     | 1,33 | 0,005873 | 0,316 | 204313_s_at | cAMP responsive element binding protein 1                    | CREB1       |
| 2338  | 46,9     | 35,3    | 1,33 | 0,015605 | 0,364 | 231016_s_at | Aryl hydrocarbon receptor nuclear translocator               | ARNT        |
| 3400  | 124      | 93,6    | 1,33 | 0,024254 | 0,390 | 222667_s_at | Ash1 (absent, small, or homeotic)-like (Drosophila)          | ASH1L       |
| 3648  | 55,8     | 42,0    | 1,33 | 0,026358 | 0,395 | 230734_x_at | Striatin, calmodulin binding protein                         | STRN        |
| 3298  | 118      | 88,6    | 1,33 | 0,023502 | 0,388 | 216246_at   | Ribosomal protein S20                                        | RPS20       |
| 5196  | 11,1     | 8,32    | 1,33 | 0,040056 | 0,421 | 237491_at   | Myosin, heavy chain 10, non-muscle                           | MYH10       |
| 3673  | 159      | 120     | 1,33 | 0,026526 | 0,395 | 221589_s_at | Aldehyde dehydrogenase 6 family, member A1                   | ALDH6A1     |
| 4968  | 14,8     | 11,2    | 1,33 | 0,038109 | 0,419 | 208200_at   | Interleukin 1, alpha                                         | IL1A        |
| 241   | 529      | 398     | 1,33 | 0,001111 | 0,250 | 224838_at   | Forkhead box P1                                              | FOXP1       |
| 4215  | 58,5     | 44,0    | 1,33 | 0,031226 | 0,405 | 204085_s_at | Ceroid-lipofuscinosis, neuronal 5                            | CLN5        |
| 1121  | 36,6     | 27,6    | 1,33 | 0,006545 | 0,319 | 222599_s_at | Neuron navigator 2                                           | NAV2        |
| 2190  | 29,8     | 22,4    | 1,33 | 0,014502 | 0,361 | 243790_at   | Zinc finger protein 585A                                     | ZNF585A     |
| 4744  | 28,7     | 21,6    | 1,33 | 0,035936 | 0,414 | 205809_s_at | Wiskott-Aldrich syndrome-like                                | WASL        |
| 5223  | 55,4     | 41,8    | 1,33 | 0,040397 | 0,423 | 228466_at   | GA binding protein transcription factor, beta subunit 2      | GABPB2      |
| 5051  | 121      | 91,5    | 1,33 | 0,038920 | 0,420 | 209515_s_at | RAB27A, member RAS oncogene family                           | RAB27A      |
| 1901  | 71,3     | 53,8    | 1,33 | 0,012362 | 0,355 | 203329_at   | Protein tyrosine phosphatase, receptor type, M               | PTPRM       |
| 1996  | 9,36     | 7,06    | 1,33 | 0,013038 | 0,355 | 237133_at   | Sterile alpha motif and leucine zipper containing kinase AZK | ZAK         |
| 4347  | 118      | 89,1    | 1,33 | 0,032377 | 0,407 | 238002_at   | Golgi integral membrane protein 4                            | GOLIM4      |
| 4166  | 160      | 121     | 1,33 | 0,030780 | 0,404 | 202040_s_at | Jumonji, AT rich interactive domain 1A                       | JARID1A     |
| 653   | 91,7     | 69,2    | 1,32 | 0,003728 | 0,308 | 221771_s_at | M-phase phosphoprotein, mpp8                                 | HSMPP8      |
| 1534  | 63,7     | 48,1    | 1,32 | 0,009505 | 0,337 | 219348_at   | SNARE-like tail-anchored protein 1 homolog                   | USE1        |
| 5194  | 197      | 149     | 1,32 | 0,040040 | 0,421 | 212044_s_at | Ribosomal protein L27a                                       | RPL27A      |
| 3509  | 209      | 158     | 1,32 | 0,025212 | 0,392 | 226447_at   | Ash1 (absent, small, or homeotic)-like (Drosophila)          | ASH1L       |
| 228   | 73,2     | 55,3    | 1,32 | 0,001054 | 0,250 | 220212_s_at | Thyroid adenoma associated                                   | THADA       |
| 1579  | 95,6     | 72,2    | 1,32 | 0,009820 | 0,340 | 225769_at   | Component of oligomeric golgi complex 6                      | COG6        |

| Index | Mutated* | Normal* | FC   | P value  | FDR** | Probe set   | Description                                                   | Gene symbol      |
|-------|----------|---------|------|----------|-------|-------------|---------------------------------------------------------------|------------------|
| 1185  | 42,8     | 32,3    | 1,32 | 0,006976 | 0,322 | 215153_at   | Nitric oxide synthase 1 (neuronal) adaptor protein            | <i>NOS1AP</i>    |
| 2519  | 35,1     | 26,5    | 1,32 | 0,016999 | 0,369 | 213575_at   | Transformer-2 alpha                                           | <i>TRA2A</i>     |
| 4716  | 6,36     | 4,81    | 1,32 | 0,035671 | 0,413 | 1569348_at  | TPTE pseudogene                                               | <i>psiTPTE22</i> |
| 1461  | 95,4     | 72,1    | 1,32 | 0,008929 | 0,334 | 225507_at   | Splicing factor, arginine/serine-rich 18                      | <i>SFRS18</i>    |
| 1156  | 9,67     | 7,31    | 1,32 | 0,006789 | 0,321 | 227766_at   | Ligase IV, DNA, ATP-dependent                                 | <i>LIG4</i>      |
| 4911  | 69,4     | 52,4    | 1,32 | 0,037558 | 0,418 | 215221_at   | Forkhead box P1                                               | <i>FOXP1</i>     |
| 2493  | 8,83     | 6,68    | 1,32 | 0,016799 | 0,367 | 241026_at   | ADAM metallopeptidase domain 12                               | <i>ADAM12</i>    |
| 3175  | 149      | 113     | 1,32 | 0,022527 | 0,387 | 222763_s_at | WD repeat domain 33                                           | <i>WDR33</i>     |
| 3837  | 91,7     | 69,3    | 1,32 | 0,028033 | 0,399 | 204312_x_at | cAMP responsive element binding protein 1                     | <i>CREB1</i>     |
| 3553  | 59,2     | 44,8    | 1,32 | 0,025615 | 0,394 | 243931_at   | CD58 molecule                                                 | <i>CD58</i>      |
| 3066  | 42,4     | 32,1    | 1,32 | 0,021616 | 0,385 | 222487_s_at | Ribosomal protein S27-like                                    | <i>RPS27L</i>    |
| 4162  | 10,4     | 7,88    | 1,32 | 0,030770 | 0,404 | 1560171_at  | SNF2 histone linker PHD RING helicase                         | <i>SHPRH</i>     |
| 4674  | 22,8     | 17,3    | 1,32 | 0,035295 | 0,413 | 1554438_at  | KIAA1217 protein                                              | <i>KIAA1217</i>  |
| 783   | 28,0     | 21,2    | 1,32 | 0,004489 | 0,311 | 224023_s_at | Chromosome 3 open reading frame 10                            | <i>C3orf10</i>   |
| 5765  | 41,4     | 31,4    | 1,32 | 0,046330 | 0,439 | 216521_s_at | BRCA1/BRCA2-containing complex, subunit 3                     | <i>BRCC3</i>     |
| 1288  | 134      | 101     | 1,32 | 0,007671 | 0,325 | 218204_s_at | FYVE and coiled-coil domain containing 1                      | <i>FYCO1</i>     |
| 4728  | 128      | 97,1    | 1,32 | 0,035787 | 0,414 | 213642_at   | Ribosomal protein L27                                         | <i>RPL27</i>     |
| 4583  | 9,00     | 6,82    | 1,32 | 0,034643 | 0,412 | 207345_at   | Follistatin                                                   | <i>FST</i>       |
| 2129  | 60,4     | 45,8    | 1,32 | 0,014003 | 0,359 | 214513_s_at | cAMP responsive element binding protein 1                     | <i>CREB1</i>     |
| 1218  | 121      | 92,0    | 1,32 | 0,007243 | 0,324 | 230440_at   | Zinc finger protein 469                                       | <i>ZNF469</i>    |
| 3325  | 822      | 623     | 1,32 | 0,023623 | 0,388 | 208662_s_at | Tetratricopeptide repeat domain 3                             | <i>TTC3</i>      |
| 182   | 6,02     | 4,56    | 1,32 | 0,000839 | 0,244 | 239539_at   | NIMA (never in mitosis gene a)-related kinase 3               | <i>NEK3</i>      |
| 1181  | 15,0     | 11,3    | 1,32 | 0,006957 | 0,322 | 1561689_at  | cDNA DKFZp547G1518                                            | -                |
| 2977  | 20,0     | 15,2    | 1,32 | 0,020921 | 0,384 | 243050_at   | Peripheral myelin protein 22                                  | <i>PMP22</i>     |
| 5448  | 51,0     | 38,6    | 1,32 | 0,042968 | 0,431 | 204645_at   | Cyclin T2                                                     | <i>CCNT2</i>     |
| 1928  | 838      | 636     | 1,32 | 0,012570 | 0,355 | 218205_s_at | MAP kinase interacting serine/threonine kinase 2              | <i>MKMK2</i>     |
| 4237  | 13,5     | 10,3    | 1,32 | 0,031402 | 0,405 | 242576_x_at | NEDD4 binding protein 2-like 2                                | <i>N4BP2L2</i>   |
| 3856  | 322      | 244     | 1,32 | 0,028153 | 0,399 | 218242_s_at | suppressor of variegation 4-20 homolog 1 (Drosophila)         | <i>SUV420H1</i>  |
| 609   | 14,1     | 10,7    | 1,32 | 0,003435 | 0,308 | 236557_at   | Zinc finger and BTB domain containing 38                      | <i>ZBTB38</i>    |
| 3342  | 6,90     | 5,24    | 1,32 | 0,023724 | 0,388 | 236930_at   | Numb homolog (Drosophila)                                     | <i>NUMB</i>      |
| 3069  | 7,22     | 5,48    | 1,32 | 0,021663 | 0,385 | 1558199_at  | Fibronectin 1                                                 | <i>FN1</i>       |
| 4675  | 65,0     | 49,3    | 1,32 | 0,035307 | 0,413 | 202699_s_at | Transmembrane protein 63A                                     | <i>TMEM63A</i>   |
| 6047  | 122      | 92,8    | 1,32 | 0,049281 | 0,445 | 227447_at   | Superkiller viralicidic activity 2-like 2 (S. cerevisiae)     | <i>SKIV2L2</i>   |
| 544   | 1223     | 928     | 1,32 | 0,002926 | 0,294 | 217802_s_at | Nuclear casein kinase and cyclin-dependent kinase substrate 1 | <i>NUCKS1</i>    |
| 4833  | 239      | 181     | 1,32 | 0,036829 | 0,417 | 218618_s_at | Fibronectin type III domain containing 3B                     | <i>FNDC3B</i>    |
| 4430  | 24,1     | 18,3    | 1,32 | 0,033173 | 0,409 | 232716_at   | cDNA FLJ11971 fis, clone HEMBB1001208                         | -                |
| 2011  | 1441     | 1094    | 1,32 | 0,013111 | 0,355 | 228222_at   | Protein phosphatase 1, catalytic subunit, beta isoform        | <i>PPP1CB</i>    |
| 1268  | 364      | 277     | 1,32 | 0,007544 | 0,325 | 224571_at   | Interferon regulatory factor 2 binding protein 2              | <i>IRF2BP2</i>   |
| 2999  | 34,2     | 26,0    | 1,32 | 0,021113 | 0,385 | 230395_at   | Methyltransferase like 9                                      | <i>METTL9</i>    |
| 3021  | 178      | 135     | 1,32 | 0,021274 | 0,385 | 214004_s_at | Vestigial like 4 (Drosophila)                                 | <i>VGLL4</i>     |
| 3861  | 116      | 88,3    | 1,32 | 0,028187 | 0,399 | 202778_s_at | Zinc finger, MYM-type 2                                       | <i>ZMYM2</i>     |
| 320   | 169      | 129     | 1,31 | 0,001600 | 0,272 | 225695_at   | Chromosome 2 open reading frame 18                            | <i>C2orf18</i>   |
| 2708  | 10,9     | 8,26    | 1,31 | 0,018567 | 0,375 | 238967_at   | Claudin 1                                                     | <i>CLDN1</i>     |
| 3709  | 137      | 104     | 1,31 | 0,026822 | 0,395 | 225181_at   | AT rich interactive domain 1B (SWI1-like)                     | <i>ARID1B</i>    |
| 3507  | 64,4     | 49,0    | 1,31 | 0,025199 | 0,392 | 220992_s_at | Chromosome 1 open reading frame 25                            | <i>C1orf25</i>   |
| 3776  | 139      | 106     | 1,31 | 0,027447 | 0,397 | 224097_s_at | F11 receptor                                                  | <i>F11R</i>      |
| 2006  | 84,0     | 63,9    | 1,31 | 0,013086 | 0,355 | 223211_at   | 2-hydroxyacyl-CoA lyase 1                                     | <i>HACL1</i>     |
| 2845  | 74,9     | 57,1    | 1,31 | 0,019914 | 0,383 | 232902_s_at | Arginyl-tRNA synthetase 2, mitochondrial (putative)           | <i>RARS2</i>     |
| 3263  | 52,0     | 39,6    | 1,31 | 0,023162 | 0,388 | 236160_at   | Thyroid hormone receptor interactor 11                        | <i>TRIP11</i>    |
| 2225  | 77,6     | 59,1    | 1,31 | 0,014790 | 0,363 | 218092_s_at | HIV-1 Rev binding protein                                     | <i>HRB</i>       |
| 4676  | 73,8     | 56,2    | 1,31 | 0,035307 | 0,413 | 205084_at   | B-cell receptor-associated protein 29                         | <i>BCAP29</i>    |
| 780   | 10,0     | 7,63    | 1,31 | 0,004474 | 0,311 | 232599_at   | Exocyst complex component 6                                   | <i>EXOC6</i>     |
| 4588  | 63,9     | 48,8    | 1,31 | 0,034690 | 0,412 | 230619_at   | Aryl hydrocarbon receptor nuclear translocator                | <i>ARNT</i>      |
| 2705  | 15,3     | 11,6    | 1,31 | 0,018551 | 0,375 | 210290_at   | Zinc finger protein 174                                       | <i>ZNF174</i>    |
| 1858  | 32,8     | 25,0    | 1,31 | 0,011974 | 0,352 | 214057_at   | Myeloid cell leukemia sequence 1 (BCL2-related)               | <i>MCL1</i>      |
| 2041  | 151      | 115     | 1,31 | 0,013276 | 0,355 | 208772_at   | Ankyrin repeat and KH domain containing 1                     | <i>ANKHD1</i>    |
| 5921  | 8,31     | 6,34    | 1,31 | 0,047993 | 0,443 | 228577_x_at | Outer dense fiber of sperm tails 2-like                       | <i>ODF2L</i>     |

| Index | Mutated* | Normal* | FC   | P value  | FDR** | Probe set   | Description                                              | Gene symbol      |
|-------|----------|---------|------|----------|-------|-------------|----------------------------------------------------------|------------------|
| 3463  | 50,1     | 38,3    | 1,31 | 0,024811 | 0,392 | 204167_at   | Biotinidase                                              | <i>BTD</i>       |
| 794   | 57,5     | 43,9    | 1,31 | 0,004535 | 0,311 | 205340_at   | Zinc finger and BTB domain containing 24                 | <i>ZBTB24</i>    |
| 3534  | 19,5     | 14,9    | 1,31 | 0,025404 | 0,393 | 236094_at   | Transcription factor 7-like 2 (T-cell specific, HMG-box) | <i>TCF7L2</i>    |
| 3199  | 26,7     | 20,4    | 1,31 | 0,022658 | 0,387 | 228184_at   | Dispatched homolog 1 (Drosophila)                        | <i>DISP1</i>     |
| 4811  | 11,9     | 9,05    | 1,31 | 0,036542 | 0,415 | 222242_s_at | Kallikrein-related peptidase 5                           | <i>KLK5</i>      |
| 4173  | 75,7     | 57,8    | 1,31 | 0,030852 | 0,404 | 202440_s_at | Suppression of tumorigenicity 5                          | <i>ST5</i>       |
| 2829  | 67,6     | 51,6    | 1,31 | 0,019735 | 0,381 | 226981_at   | Myeloid/lymphoid or mixed-lineage leukemia               | <i>MLL</i>       |
| 3278  | 86,0     | 65,7    | 1,31 | 0,023351 | 0,388 | 218713_at   | NMDA receptor regulated 2                                | <i>NARG2</i>     |
| 984   | 169      | 129     | 1,31 | 0,005692 | 0,315 | 203156_at   | A kinase (PRKA) anchor protein 11                        | <i>AKAP11</i>    |
| 4681  | 27,3     | 20,9    | 1,31 | 0,035344 | 0,413 | 238028_at   | Chromosome 6 open reading frame 132                      | <i>C6orf132</i>  |
| 5093  | 223      | 171     | 1,31 | 0,039187 | 0,420 | 202373_s_at | RAB3 GTPase activating protein subunit 2 (non-catalytic) | <i>RAB3GAP2</i>  |
| 4180  | 230      | 176     | 1,31 | 0,030902 | 0,404 | 212418_at   | E74-like factor 1 (ets domain transcription factor)      | <i>ELF1</i>      |
| 2049  | 221      | 169     | 1,31 | 0,013309 | 0,355 | 214594_x_at | ATPase, Class I, type 8B, member 1                       | <i>ATP8B1</i>    |
| 5159  | 51,8     | 39,6    | 1,31 | 0,039732 | 0,421 | 217653_x_at | -                                                        | -                |
| 3750  | 155      | 119     | 1,31 | 0,027267 | 0,397 | 218323_at   | RAS homolog gene family, member T1                       | <i>RHOT1</i>     |
| 605   | 36,1     | 27,6    | 1,31 | 0,003356 | 0,303 | 235240_at   | Ataxin 3                                                 | <i>ATXN3</i>     |
| 3666  | 1006     | 770     | 1,31 | 0,026498 | 0,395 | 223000_s_at | F11 receptor                                             | <i>F11R</i>      |
| 2383  | 9,37     | 7,16    | 1,31 | 0,015893 | 0,364 | 244286_at   | Formin binding protein 1                                 | <i>FNBP1</i>     |
| 3106  | 262      | 201     | 1,31 | 0,021931 | 0,386 | 203137_at   | Wilms tumor 1 associated protein                         | <i>WTAP</i>      |
| 4662  | 28,7     | 22,0    | 1,31 | 0,035198 | 0,413 | 243492_at   | Thioesterase superfamily member 4                        | <i>THEM4</i>     |
| 5207  | 37,1     | 28,4    | 1,31 | 0,040181 | 0,422 | 1552656_s_a | U2AF homology motif (UHM) kinase 1                       | <i>UHMK1</i>     |
| 4844  | 87,7     | 67,1    | 1,31 | 0,036919 | 0,417 | 203883_s_at | RAB11 family interacting protein 2 (class I)             | <i>RAB11FIP2</i> |
| 4564  | 96,7     | 74,0    | 1,31 | 0,034503 | 0,412 | 202165_at   | Protein phosphatase 1, regulatory (inhibitor) subunit 2  | <i>PPP1R2</i>    |
| 223   | 16,1     | 12,3    | 1,31 | 0,001029 | 0,250 | 238841_at   | Protein tyrosine phosphatase domain containing 1         | <i>PTPDC1</i>    |
| 4893  | 372      | 285     | 1,31 | 0,037386 | 0,418 | 1554241_at  | Coagulation factor C homolog, cochlin                    | <i>COCH</i>      |
| 912   | 78,1     | 59,8    | 1,31 | 0,005252 | 0,313 | 203187_at   | Dedicator of cytokinesis 1                               | <i>DOCK1</i>     |
| 3399  | 60,0     | 45,9    | 1,31 | 0,024249 | 0,390 | 203375_s_at | Tripeptidyl peptidase II                                 | <i>TPP2</i>      |
| 4012  | 71,5     | 54,7    | 1,31 | 0,029386 | 0,400 | 215698_at   | Jumonji, AT rich interactive domain 1A                   | <i>JARID1A</i>   |
| 1399  | 290      | 222     | 1,31 | 0,008450 | 0,330 | 200931_s_at | Vinculin                                                 | <i>VCL</i>       |
| 5854  | 23,6     | 18,1    | 1,31 | 0,047338 | 0,442 | 222736_s_at | Transmembrane protein 38B                                | <i>TMEM38B</i>   |
| 3942  | 20,0     | 15,4    | 1,31 | 0,028788 | 0,399 | 222134_at   | D-aspartate oxidase                                      | <i>DDO</i>       |
| 4973  | 9,85     | 7,54    | 1,31 | 0,038156 | 0,419 | 203699_s_at | Deiodinase, iodothyronine, type II                       | <i>DIO2</i>      |
| 1676  | 83,0     | 63,6    | 1,31 | 0,010574 | 0,345 | 215136_s_at | Exosome component 8                                      | <i>EXOSC8</i>    |
| 5658  | 60,8     | 46,6    | 1,31 | 0,045133 | 0,436 | 218503_at   | KIAA1797 protein                                         | <i>KIAA1797</i>  |
| 5842  | 113      | 86,5    | 1,31 | 0,047213 | 0,442 | 215450_at   | Small nuclear ribonucleoprotein polypeptide E            | <i>SNRPE</i>     |
| 6038  | 45,6     | 34,9    | 1,31 | 0,049156 | 0,445 | 219687_at   | Hedgehog acyltransferase                                 | <i>HHAT</i>      |
| 2762  | 76,0     | 58,2    | 1,30 | 0,019163 | 0,379 | 220925_at   | N(alpha)-acetyltransferase 35, NatC auxiliary subunit    | <i>MAK10</i>     |
| 1081  | 179      | 137     | 1,30 | 0,006326 | 0,319 | 223028_s_at | Sorting nexin 9                                          | <i>SNX9</i>      |
| 5977  | 46,9     | 35,9    | 1,30 | 0,048541 | 0,444 | 232046_at   | KIAA1217 protein                                         | <i>KIAA1217</i>  |
| 1250  | 911      | 699     | 1,30 | 0,007424 | 0,325 | 224569_s_at | Interferon regulatory factor 2 binding protein 2         | <i>IRF2BP2</i>   |
| 5137  | 6,22     | 4,77    | 1,30 | 0,039544 | 0,421 | 241885_at   | 68 kDa TATA-binding protein-associated factor            | <i>TAF15</i>     |
| 3741  | 45,3     | 34,7    | 1,30 | 0,027224 | 0,397 | 214221_at   | Alstrom syndrome 1                                       | <i>ALMS1</i>     |
| 2673  | 37,0     | 28,4    | 1,30 | 0,018275 | 0,374 | 1558996_at  | Forkhead box P1                                          | <i>FOXP1</i>     |
| 3890  | 76,6     | 58,8    | 1,30 | 0,028433 | 0,399 | 213788_s_at | Non-protein coding RNA 94                                | <i>FLJ35348</i>  |
| 2907  | 80,3     | 61,6    | 1,30 | 0,020432 | 0,383 | 203971_at   | Solute carrier family 31 (copper transporters), member 1 | <i>SLC31A1</i>   |
| 171   | 106      | 81,4    | 1,30 | 0,000791 | 0,244 | 227026_at   | M-phase phosphoprotein, mpp8                             | <i>HSMPP8</i>    |
| 3214  | 11,4     | 8,76    | 1,30 | 0,022771 | 0,387 | 244669_at   | Small nucleolar RNA, C/D box 50A                         | <i>SNHG5</i>     |
| 1321  | 8,87     | 6,81    | 1,30 | 0,007877 | 0,326 | 238859_at   | Family with sequence similarity 149, member B1           | <i>FAM149B1</i>  |
| 1407  | 180      | 138     | 1,30 | 0,008500 | 0,330 | 219083_at   | SHQ1 homolog (S. cerevisiae)                             | <i>SHQ1</i>      |
| 4929  | 44,4     | 34,1    | 1,30 | 0,037797 | 0,419 | 227891_s_at | 68 kDa TATA-binding protein-associated factor            | <i>TAF15</i>     |
| 1396  | 151      | 116     | 1,30 | 0,008434 | 0,330 | 203132_at   | Retinoblastoma 1 (including osteosarcoma)                | <i>RB1</i>       |
| 4807  | 38,5     | 29,6    | 1,30 | 0,036495 | 0,415 | 212366_at   | Zinc finger protein 292                                  | <i>ZNF292</i>    |
| 3640  | 168      | 129     | 1,30 | 0,026326 | 0,395 | 223189_x_at | Myeloid/lymphoid or mixed-lineage leukemia 5             | <i>MLL5</i>      |
| 3711  | 266      | 205     | 1,30 | 0,026866 | 0,396 | 208815_x_at | Heat shock 70kDa protein 4                               | <i>HSPA4</i>     |
| 1118  | 292      | 224     | 1,30 | 0,006533 | 0,319 | 202181_at   | KIAA0247 protein                                         | <i>KIAA0247</i>  |
| 1958  | 186      | 143     | 1,30 | 0,012798 | 0,355 | 202515_at   | Discs, large homolog 1 (Drosophila)                      | <i>DLG1</i>      |
| 1969  | 32,6     | 25,0    | 1,30 | 0,012861 | 0,355 | 201905_s_at | CTD small phosphatase-like protein                       | <i>CTDSPL</i>    |

| Index | Mutated* | Normal* | FC   | P value  | FDR** | Probe set   | Description                                                        | Gene symbol      |
|-------|----------|---------|------|----------|-------|-------------|--------------------------------------------------------------------|------------------|
| 2555  | 94,7     | 72,8    | 1,30 | 0,017292 | 0,370 | 212923_s_at | Chromosome 6 open reading frame 145                                | <i>C6orf145</i>  |
| 5628  | 240      | 185     | 1,30 | 0,044933 | 0,436 | 208999_at   | Septin 8                                                           | <i>SEPT8</i>     |
| 1483  | 23,4     | 18,0    | 1,30 | 0,009115 | 0,336 | 243350_at   | Chromosome 5 open reading frame 15                                 | <i>C5orf15</i>   |
| 2226  | 21,6     | 16,6    | 1,30 | 0,014798 | 0,363 | 231995_at   | Chromosome 9 open reading frame 82                                 | <i>C9orf82</i>   |
| 2496  | 488      | 375     | 1,30 | 0,016821 | 0,367 | 229394_s_at | Glucocorticoid receptor DNA binding factor 1                       | <i>GRLF1</i>     |
| 5666  | 114      | 87,7    | 1,30 | 0,045208 | 0,436 | 220419_s_at | Ubiquitin specific peptidase 25                                    | <i>USP25</i>     |
| 4315  | 4,43     | 3,41    | 1,30 | 0,032137 | 0,407 | 242906_at   | cDNA DKFZp313B1017                                                 | -                |
| 2484  | 204      | 157     | 1,30 | 0,016747 | 0,367 | 204314_s_at | cAMP responsive element binding protein 1                          | <i>CREB1</i>     |
| 1222  | 12,1     | 9,33    | 1,30 | 0,007269 | 0,324 | 201335_s_at | Rho guanine nucleotide exchange factor (GEF) 12                    | <i>ARHGEF12</i>  |
| 4492  | 111      | 85,7    | 1,30 | 0,033777 | 0,411 | 201883_s_at | UDP-Gal:betaGlcNAc beta 1,4- galactosyltransferase, polypeptide 1  | <i>B4GALT1</i>   |
| 2376  | 74,8     | 57,6    | 1,30 | 0,015843 | 0,364 | 205606_at   | Low density lipoprotein receptor-related protein 6                 | <i>LRP6</i>      |
| 1089  | 26,2     | 20,2    | 1,30 | 0,006385 | 0,319 | 212759_s_at | Transcription factor 7-like 2 (T-cell specific, HMG-box)           | <i>TCF7L2</i>    |
| 2488  | 10,3     | 7,93    | 1,30 | 0,016766 | 0,367 | 225807_at   | Jub, ajuba homolog (Xenopus laevis)                                | <i>JUB</i>       |
| 91    | 134      | 103     | 1,30 | 0,000335 | 0,201 | 220355_s_at | Polybromo 1                                                        | <i>PBRM1</i>     |
| 4153  | 46,5     | 35,8    | 1,30 | 0,030632 | 0,403 | 224631_at   | Zinc finger protein 91 homolog (mouse)                             | <i>ZFP91</i>     |
| 2045  | 15,9     | 12,3    | 1,30 | 0,013297 | 0,355 | 231933_at   | Membrane-associated ring finger (C3HC4) 8                          | <i>MARCH8</i>    |
| 3284  | 206      | 159     | 1,30 | 0,023406 | 0,388 | 223190_s_at | Myeloid/lymphoid or mixed-lineage leukemia 5                       | <i>MLL5</i>      |
| 3796  | 209      | 161     | 1,30 | 0,027652 | 0,398 | 212888_at   | Dicer1, Dcr-1 homolog (Drosophila)                                 | <i>DICER1</i>    |
| 4995  | 98,1     | 75,5    | 1,30 | 0,038339 | 0,420 | 225954_s_at | Midnolin                                                           | <i>MIDN</i>      |
| 2218  | 9,64     | 7,43    | 1,30 | 0,014709 | 0,362 | 217951_s_at | PHD finger protein 3                                               | <i>PHF3</i>      |
| 2105  | 11,5     | 8,89    | 1,30 | 0,013791 | 0,358 | 239930_at   | UDP-GalNAc:polypeptide N-acetylgalactosaminyltransferase 2         | <i>GALNT2</i>    |
| 4101  | 253      | 195     | 1,30 | 0,030146 | 0,402 | 202271_at   | F-box protein 28                                                   | <i>FBXO28</i>    |
| 603   | 22,8     | 17,6    | 1,30 | 0,003349 | 0,303 | 205135_s_at | nuclear fragile X mental retardation protein interacting protein 1 | <i>NUFIP1</i>    |
| 5735  | 101      | 78,1    | 1,30 | 0,046000 | 0,438 | 234491_s_at | Salvador homolog 1 (Drosophila)                                    | <i>SAV1</i>      |
| 6113  | 4633     | 3570    | 1,30 | 0,049881 | 0,446 | 215076_s_at | Collagen, type III, alpha 1                                        | <i>COL3A1</i>    |
| 5249  | 287      | 221     | 1,30 | 0,040640 | 0,423 | 228785_at   | Zinc finger protein 281                                            | <i>ZNF281</i>    |
| 5708  | 140      | 108     | 1,30 | 0,045701 | 0,438 | 205178_s_at | Retinoblastoma binding protein 6                                   | <i>RBBP6</i>     |
| 5775  | 78,8     | 60,8    | 1,30 | 0,046449 | 0,440 | 204066_s_at | Centaurin, gamma 2                                                 | <i>CENTG2</i>    |
| 3555  | 755      | 582     | 1,30 | 0,025641 | 0,394 | 200983_x_at | CD59 molecule, complement regulatory protein                       | <i>CD59</i>      |
| 5524  | 13,0     | 10,0    | 1,30 | 0,043811 | 0,433 | 230126_s_at | Jumonji domain containing 2B                                       | <i>JMJD2B</i>    |
| 3999  | 123      | 95,0    | 1,30 | 0,029269 | 0,400 | 228980_at   | Ring finger and FYVE-like domain containing 1                      | <i>RFFL</i>      |
| 1420  | 58,5     | 45,2    | 1,30 | 0,008606 | 0,331 | 235728_at   | Zinc finger protein 3 homolog (mouse)                              | <i>ZFP3</i>      |
| 2468  | 46,1     | 35,6    | 1,30 | 0,016587 | 0,367 | 239035_at   | 5,10-methylenetetrahydrofolate reductase (NADPH)                   | <i>MTHFR</i>     |
| 1229  | 294      | 227     | 1,29 | 0,007311 | 0,324 | 201302_at   | Annexin A4                                                         | <i>ANXA4</i>     |
| 4333  | 187      | 144     | 1,29 | 0,032255 | 0,407 | 214177_s_at | Pre-B-cell leukemia homeobox interacting protein 1                 | <i>PBXIP1</i>    |
| 2280  | 240      | 186     | 1,29 | 0,015155 | 0,363 | 225629_s_at | Zinc finger and BTB domain containing 4                            | <i>ZBTB4</i>     |
| 2530  | 185      | 143     | 1,29 | 0,017088 | 0,369 | 202372_at   | RAB3 GTPase activating protein subunit 2 (non-catalytic)           | <i>RAB3GAP2</i>  |
| 5392  | 195      | 151     | 1,29 | 0,042279 | 0,429 | 225334_at   | Chromosome 10 open reading frame 32                                | <i>C10orf32</i>  |
| 2135  | 5,02     | 3,88    | 1,29 | 0,014029 | 0,359 | 1564699_at  | cDNA clone IMAGE:4297077                                           | -                |
| 2589  | 80,1     | 61,9    | 1,29 | 0,017551 | 0,371 | 202414_at   | DNA excision repair protein ERCC-5                                 | <i>ERCC5</i>     |
| 2257  | 24,7     | 19,1    | 1,29 | 0,015020 | 0,363 | 229298_at   | Kelch repeat and BTB (POZ) domain containing 7                     | <i>KBTBD7</i>    |
| 1390  | 195      | 150     | 1,29 | 0,008404 | 0,330 | 210249_s_at | Nuclear receptor coactivator 1                                     | <i>NCOA1</i>     |
| 2761  | 20,1     | 15,5    | 1,29 | 0,019156 | 0,379 | 230937_at   | Hypothetical protein LOC285835                                     | <i>LOC285835</i> |
| 982   | 307      | 237     | 1,29 | 0,005690 | 0,315 | 211503_s_at | RAB14, member RAS oncogene family                                  | <i>RAB14</i>     |
| 1713  | 4,34     | 3,36    | 1,29 | 0,010984 | 0,348 | 221805_at   | neurofilament, light polypeptide 68kDa                             | <i>NEFL</i>      |
| 4539  | 170      | 132     | 1,29 | 0,034291 | 0,412 | 212648_at   | DEAH (Asp-Glu-Ala-His) box polypeptide 29                          | <i>DHX29</i>     |
| 4157  | 108      | 83,4    | 1,29 | 0,030721 | 0,404 | 218802_at   | Coiled-coil domain containing 109B                                 | <i>CCDC109B</i>  |
| 4212  | 298      | 231     | 1,29 | 0,031187 | 0,405 | 213233_s_at | Kelch-like 9 (Drosophila)                                          | <i>KLHL9</i>     |
| 5340  | 334      | 259     | 1,29 | 0,041822 | 0,428 | 201015_s_at | Junction plakoglobin                                               | <i>JUP</i>       |
| 4249  | 281      | 218     | 1,29 | 0,031552 | 0,406 | 202593_s_at | Membrane interacting protein of RGS16                              | <i>MIR16</i>     |
| 5621  | 61,7     | 47,8    | 1,29 | 0,044867 | 0,436 | 218644_at   | Pleckstrin 2                                                       | <i>PLEK2</i>     |
| 2345  | 28,6     | 22,2    | 1,29 | 0,015647 | 0,364 | 207492_at   | N-glycanase 1                                                      | <i>NGLY1</i>     |
| 1967  | 1471     | 1140    | 1,29 | 0,012857 | 0,355 | 226880_at   | Nuclear casein kinase and cyclin-dependent kinase substrate 1      | <i>NUCKS1</i>    |
| 1630  | 6,92     | 5,36    | 1,29 | 0,010280 | 0,344 | 235133_at   | Zinc finger, DHHC domain containing 14                             | <i>ZDHHC14</i>   |
| 1179  | 13,7     | 10,6    | 1,29 | 0,006930 | 0,321 | 244536_at   | Tumor protein p53 binding protein, 2                               | <i>TP53BP2</i>   |
| 5096  | 57,9     | 44,9    | 1,29 | 0,039207 | 0,420 | 210731_s_at | Lectin, galactoside-binding, soluble, 8 (galectin 8)               | <i>LGALS8</i>    |
| 1068  | 333      | 258     | 1,29 | 0,006266 | 0,319 | 203033_x_at | Fumarate hydratase                                                 | <i>FH</i>        |

| Index | Mutated* | Normal* | FC   | P value  | FDR** | Probe set   | Description                                                       | Gene symbol |
|-------|----------|---------|------|----------|-------|-------------|-------------------------------------------------------------------|-------------|
| 1436  | 6,50     | 5,04    | 1,29 | 0,008701 | 0,331 | 222936_s_at | PPPDE peptidase domain containing 1                               | PPPDE1      |
| 4562  | 5,57     | 4,32    | 1,29 | 0,034472 | 0,412 | 1559360_at  | Ephrin-A5                                                         | EFNA5       |
| 3460  | 8,20     | 6,36    | 1,29 | 0,024786 | 0,392 | 1559343_at  | Small nuclear ribonucleoprotein polypeptide N                     | SNRPN       |
| 2575  | 273      | 212     | 1,29 | 0,017479 | 0,371 | 203045_at   | Ninjurin 1                                                        | NINJ1       |
| 385   | 245      | 190     | 1,29 | 0,002005 | 0,284 | 223238_s_at | Polybromo 1                                                       | PBRM1       |
| 4238  | 23,7     | 18,4    | 1,29 | 0,031402 | 0,405 | 1555082_a_a | NIMA (never in mitosis gene a)- related kinase 11                 | NEK11       |
| 1599  | 22,5     | 17,5    | 1,29 | 0,009976 | 0,341 | 224375_at   | -                                                                 | -           |
| 1385  | 15,4     | 12,0    | 1,29 | 0,008329 | 0,329 | 1558755_x_a | Zinc finger protein 763                                           | ZNF763      |
| 2978  | 48,7     | 37,8    | 1,29 | 0,020942 | 0,384 | 221985_at   | Kelch-like 24 (Drosophila)                                        | KLHL24      |
| 4865  | 11,1     | 8,63    | 1,29 | 0,037107 | 0,417 | 1556423_at  | Vasohibin 1                                                       | VASH1       |
| 5215  | 164      | 127     | 1,29 | 0,040292 | 0,422 | 225399_at   | Chromosome 1 open reading frame 19                                | C1orf19     |
| 2283  | 443      | 344     | 1,29 | 0,015178 | 0,363 | 201816_s_at | Glioblastoma amplified sequence                                   | GBAS        |
| 1219  | 23,7     | 18,4    | 1,29 | 0,007250 | 0,324 | 241874_at   | Chromosome 5 open reading frame 53                                | C5orf53     |
| 6086  | 285      | 222     | 1,29 | 0,049690 | 0,446 | 206989_s_at | Splicing factor, arginine/serine-rich 2, interacting protein      | SFRS2IP     |
| 5857  | 90,8     | 70,7    | 1,29 | 0,047366 | 0,442 | 58780_s_at  | Hypothetical protein FLJ10357                                     | FLJ10357    |
| 1082  | 175      | 136     | 1,29 | 0,006332 | 0,319 | 212104_s_at | RNA binding motif protein 9                                       | RBM9        |
| 5890  | 25,8     | 20,1    | 1,29 | 0,047638 | 0,442 | 236109_at   | RNA pseudouridylate synthase domain containing 4                  | RPUSD4      |
| 3537  | 94,5     | 73,6    | 1,29 | 0,025444 | 0,393 | 210028_s_at | Origin recognition complex, subunit 3-like (yeast)                | ORC3L       |
| 2918  | 43,8     | 34,1    | 1,28 | 0,020483 | 0,383 | 234660_s_at | DIS3 mitotic control homolog (S. cerevisiae)                      | DIS3        |
| 3039  | 105      | 81,9    | 1,28 | 0,021421 | 0,385 | 218298_s_at | Chromosome 14 open reading frame 159                              | C14orf159   |
| 492   | 73,8     | 57,5    | 1,28 | 0,002634 | 0,289 | 230623_x_at | Ubiquitin specific peptidase 28                                   | USP28       |
| 4337  | 36,7     | 28,6    | 1,28 | 0,032273 | 0,407 | 219307_at   | Prenyl (decaprenyl) diphosphate synthase, subunit 2               | PDSS2       |
| 2969  | 626      | 488     | 1,28 | 0,020864 | 0,384 | 212773_s_at | Translocase of outer mitochondrial membrane 20 homolog (yeast)    | TOMM20      |
| 1667  | 132      | 103     | 1,28 | 0,010536 | 0,345 | 212676_at   | Neurofibromin 1                                                   | NF1         |
| 4377  | 80,7     | 62,9    | 1,28 | 0,032561 | 0,407 | 223679_at   | Catenin (cadherin-associated protein), beta 1, 88kDa              | CTNBN1      |
| 2813  | 123      | 95,6    | 1,28 | 0,019620 | 0,381 | 202005_at   | Suppression of tumorigenicity 14 (colon carcinoma)                | ST14        |
| 29    | 4,61     | 3,60    | 1,28 | 0,000134 | 0,201 | 234330_at   | cDNA FLJ14081 fis, clone HEMBB1002280                             | -           |
| 4967  | 17,2     | 13,4    | 1,28 | 0,038108 | 0,419 | 210251_s_at | RUN and FYVE domain containing 3                                  | RUFY3       |
| 2127  | 169      | 132     | 1,28 | 0,013995 | 0,359 | 201411_s_at | Pleckstrin homology domain-containing family B member 2           | PLEKHB2     |
| 4029  | 52,3     | 40,8    | 1,28 | 0,029509 | 0,400 | 213271_s_at | Dopey family member 1                                             | DOPEY1      |
| 5237  | 62,9     | 49,0    | 1,28 | 0,040542 | 0,423 | 204831_at   | Cyclin-dependent kinase 8                                         | CDK8        |
| 2335  | 27,4     | 21,4    | 1,28 | 0,015586 | 0,364 | 213298_at   | Nuclear factor I/C (CCAAT-binding transcription factor)           | NFIC        |
| 4434  | 89,9     | 70,2    | 1,28 | 0,033210 | 0,409 | 241993_x_at | Forkhead box P1                                                   | FOXP1       |
| 4908  | 395      | 308     | 1,28 | 0,037540 | 0,418 | 226128_at   | Chromosome 1 open reading frame 58                                | C1orf58     |
| 3568  | 18,7     | 14,6    | 1,28 | 0,025750 | 0,394 | 228748_at   | CD59 molecule, complement regulatory protein                      | CD59        |
| 3586  | 87,3     | 68,2    | 1,28 | 0,025882 | 0,394 | 1553677_a_a | TIP41, TOR signaling pathway regulator-like (S. cerevisiae)       | TIPRL       |
| 2621  | 2180     | 1702    | 1,28 | 0,017810 | 0,371 | 217807_s_at | Glioma tumor suppressor candidate region gene 2                   | GLTSCR2     |
| 4536  | 172      | 134     | 1,28 | 0,034269 | 0,412 | 217954_s_at | PHD finger protein 3                                              | PHF3        |
| 5798  | 53,9     | 42,1    | 1,28 | 0,046770 | 0,441 | 242750_at   | Methylmalonic aciduria (cobalamin deficiency) cblA type           | MMAA        |
| 3493  | 10,0     | 7,85    | 1,28 | 0,025104 | 0,392 | 224044_at   | RAS homolog gene family, member T1                                | RHOT1       |
| 5800  | 14,2     | 11,1    | 1,28 | 0,046781 | 0,441 | 206448_at   | Zinc finger protein 365                                           | ZNF365      |
| 4907  | 5,77     | 4,51    | 1,28 | 0,037524 | 0,418 | 1557961_s_a | N-terminal EF-hand calcium binding protein 1                      | NECAB1      |
| 1811  | 10,5     | 8,23    | 1,28 | 0,011679 | 0,351 | 244272_s_at | Membrane targeting (tandem) C2 domain containing 1                | MTAC2D1     |
| 1064  | 62,4     | 48,8    | 1,28 | 0,006244 | 0,319 | 227895_at   | Family with sequence similarity 120B                              | FAM120B     |
| 4008  | 93,5     | 73,1    | 1,28 | 0,029322 | 0,400 | 223021_x_at | Vps20-associated 1 homolog (S. cerevisiae)                        | VTA1        |
| 5687  | 34,5     | 27,0    | 1,28 | 0,045389 | 0,436 | 239364_at   | Ets variant 6                                                     | ETV6        |
| 5847  | 12,8     | 9,97    | 1,28 | 0,047281 | 0,442 | 228948_at   | EPH receptor A4                                                   | EPHA4       |
| 3872  | 210      | 164     | 1,28 | 0,028285 | 0,399 | 223151_at   | DCUN1 domain-containing protein 5                                 | DCUN1D5     |
| 486   | 205      | 160     | 1,28 | 0,002589 | 0,289 | 223329_x_at | SGT1, suppressor of G2 allele of SKP1 (S. cerevisiae)             | SUGT1       |
| 1743  | 13,1     | 10,2    | 1,28 | 0,011131 | 0,348 | 1569020_at  | Neural precursor cell expressed, developmentally down-regulated 9 | NEDD9       |
| 2449  | 110      | 85,9    | 1,28 | 0,016399 | 0,366 | 226277_at   | Collagen, type IV, alpha 3 (Goodpasture antigen) binding protein  | COL4A3BP    |
| 3232  | 90,8     | 71,0    | 1,28 | 0,022914 | 0,388 | 225838_at   | Enhancer of polycomb homolog 2 (Drosophila)                       | EPC2        |
| 938   | 42,2     | 33,0    | 1,28 | 0,005368 | 0,313 | 204786_s_at | Interferon (alpha, beta and omega) receptor 2                     | IFNAR2      |
| 5498  | 98,2     | 76,8    | 1,28 | 0,043512 | 0,433 | 235196_at   | Hyperparathyroidism 2 protein                                     | CDC73       |
| 1329  | 266      | 208     | 1,28 | 0,007999 | 0,328 | 217885_at   | Importin 9                                                        | IPO9        |
| 1370  | 10,8     | 8,42    | 1,28 | 0,008234 | 0,328 | 205460_at   | neuronal PAS domain protein 2                                     | NPAS2       |
| 5016  | 5,70     | 4,46    | 1,28 | 0,038592 | 0,420 | 206032_at   | Desmocollin 3                                                     | DSC3        |

| Index | Mutated* | Normal* | FC   | P value  | FDR** | Probe set   | Description                                                 | Gene symbol |
|-------|----------|---------|------|----------|-------|-------------|-------------------------------------------------------------|-------------|
| 1006  | 24,5     | 19,2    | 1,28 | 0,005833 | 0,316 | 217230_at   | Villin 2 (ezrin)                                            | VIL2        |
| 5307  | 6,06     | 4,74    | 1,28 | 0,041399 | 0,426 | 1557895_at  | FLJ35934 protein                                            | FLJ35934    |
| 577   | 7,63     | 5,98    | 1,28 | 0,003171 | 0,300 | 217538_at   | Small G protein signaling modulator 2                       | SGSM2       |
| 3138  | 105      | 82,6    | 1,28 | 0,022259 | 0,387 | 210776_x_at | Transcription factor 3                                      | TCF3        |
| 6105  | 106      | 83,2    | 1,28 | 0,049843 | 0,446 | 223304_at   | Solute carrier family 37 member 3                           | SLC37A3     |
| 5891  | 27,4     | 21,4    | 1,28 | 0,047647 | 0,442 | 230759_at   | Sorting nexin 14                                            | SNX14       |
| 2267  | 48,1     | 37,7    | 1,28 | 0,015072 | 0,363 | 240166_x_at | RNA (guanine-9-) methyltransferase domain containing 3      | RG9MTD3     |
| 5963  | 7,83     | 6,13    | 1,28 | 0,048431 | 0,444 | 241198_s_at | Chromosome 11 open reading frame 70                         | C11orf70    |
| 3865  | 60,8     | 47,7    | 1,28 | 0,028230 | 0,399 | 225539_at   | Zinc finger protein 295                                     | ZNF295      |
| 3527  | 74,1     | 58,0    | 1,28 | 0,025327 | 0,393 | 209798_at   | Nuclear protein, ataxia-telangiectasia locus                | NPAT        |
| 2689  | 123      | 96,5    | 1,28 | 0,018430 | 0,375 | 238761_at   | Mediator complex subunit 28                                 | MED28       |
| 2565  | 11,8     | 9,27    | 1,28 | 0,017400 | 0,371 | 236149_at   | THO complex 3                                               | THOC3       |
| 4541  | 60,7     | 47,6    | 1,28 | 0,034311 | 0,412 | 219303_at   | Chromosome 13 open reading frame 7                          | C13orf7     |
| 97    | 5,86     | 4,60    | 1,28 | 0,000377 | 0,212 | 1560776_at  | Family with sequence similarity 18, member B2               | FAM18B2     |
| 681   | 153      | 120     | 1,28 | 0,003912 | 0,308 | 224309_s_at | SGT1, suppressor of G2 allele of SKP1 (S. cerevisiae)       | SUGT1       |
| 5349  | 359      | 282     | 1,28 | 0,041933 | 0,429 | 202322_s_at | Geranylgeranyl diphosphate synthase 1                       | GGPS1       |
| 747   | 5,76     | 4,52    | 1,28 | 0,004234 | 0,308 | 37170_at    | BMP2 inducible kinase                                       | BMP2K       |
| 4602  | 24,9     | 19,5    | 1,28 | 0,034797 | 0,412 | 236268_at   | SEC22 vesicle trafficking protein homolog C (S. cerevisiae) | SEC22C      |
| 5570  | 6,29     | 4,93    | 1,28 | 0,044354 | 0,435 | 232885_at   | Non-protein coding RNA 81                                   | NCRNA00081  |
| 3163  | 59,1     | 46,4    | 1,28 | 0,022450 | 0,387 | 222607_s_at | DIS3 mitotic control homolog (S. cerevisiae)                | DIS3        |
| 5397  | 101      | 79,3    | 1,28 | 0,042322 | 0,429 | 210285_x_at | Wilms tumor 1 associated protein                            | WTAP        |
| 5559  | 30,4     | 23,9    | 1,27 | 0,044255 | 0,435 | 219011_at   | Pleckstrin homology domain-containing family A member 4     | PLEKHA4     |
| 3471  | 140      | 110     | 1,27 | 0,024902 | 0,392 | 231807_at   | KIAA1217 protein                                            | KIAA1217    |
| 1166  | 18,7     | 14,6    | 1,27 | 0,006860 | 0,321 | 242136_x_at | Hypothetical protein LOC403340                              | MGC70870    |
| 1342  | 7,76     | 6,09    | 1,27 | 0,008057 | 0,328 | 240465_at   | Chromosome 4 open reading frame 32                          | C4orf32     |
| 820   | 178      | 140     | 1,27 | 0,004683 | 0,312 | 207643_s_at | Tumor necrosis factor receptor superfamily, member 1A       | TNFRSF1A    |
| 1519  | 67,7     | 53,1    | 1,27 | 0,009389 | 0,337 | 213463_s_at | Family with sequence similarity 149, member B1              | FAM149B1    |
| 3664  | 342      | 269     | 1,27 | 0,026486 | 0,395 | 202677_at   | RAS p21 protein activator (GTPase activating protein) 1     | RASA1       |
| 5076  | 13,7     | 10,8    | 1,27 | 0,039052 | 0,420 | 232279_at   | PHD finger protein 15                                       | PHF15       |
| 2154  | 62,3     | 48,9    | 1,27 | 0,014186 | 0,360 | 212076_at   | Myeloid/lymphoid or mixed-lineage leukemia                  | MLL         |
| 2549  | 139      | 110     | 1,27 | 0,017262 | 0,370 | 227569_at   | Ligand of numb-protein X 2                                  | LNK2        |
| 4470  | 220      | 173     | 1,27 | 0,033588 | 0,411 | 202790_at   | Claudin 7                                                   | CLDN7       |
| 4216  | 4,20     | 3,30    | 1,27 | 0,031239 | 0,405 | 235075_at   | Desmoglein 3 (pemphigus vulgaris antigen)                   | DSG3        |
| 6044  | 78,0     | 61,3    | 1,27 | 0,049239 | 0,445 | 225504_at   | Homeobox containing 1                                       | HMBBOX1     |
| 2630  | 38,4     | 30,2    | 1,27 | 0,017905 | 0,372 | 204838_s_at | MUTL homolog 3 (E. coli)                                    | MLH3        |
| 3657  | 60,0     | 47,2    | 1,27 | 0,026413 | 0,395 | 209378_s_at | KIAA1128 protein                                            | KIAA1128    |
| 1745  | 12,0     | 9,44    | 1,27 | 0,011145 | 0,348 | 232457_at   | LIM and calponin homology domains 1                         | LIMCH1      |
| 5850  | 47,5     | 37,3    | 1,27 | 0,047331 | 0,442 | 226783_at   | Alanine-glyoxylate aminotransferase 2-like 2                | AGXT2L2     |
| 2785  | 10,0     | 7,89    | 1,27 | 0,019343 | 0,380 | 237262_at   | Family with sequence similarity 59, member A                | FAM59A      |
| 4049  | 26,4     | 20,7    | 1,27 | 0,029667 | 0,401 | 204054_at   | Phosphatase and tensin homolog                              | PTEN        |
| 4278  | 91,3     | 71,8    | 1,27 | 0,031792 | 0,406 | 222136_x_at | Zinc finger protein 43                                      | ZNF43       |
| 5169  | 23,7     | 18,7    | 1,27 | 0,039825 | 0,421 | 222364_at   | Solute carrier family 44, member 1                          | SLC44A1     |
| 4042  | 30,0     | 23,6    | 1,27 | 0,029635 | 0,401 | 228091_at   | Syntaxin 17                                                 | STX17       |
| 3593  | 632      | 497     | 1,27 | 0,025913 | 0,394 | 201334_s_at | Rho guanine nucleotide exchange factor (GEF) 12             | ARHGEF12    |
| 3047  | 176      | 138     | 1,27 | 0,021453 | 0,385 | 224703_at   | WD repeat domain 22                                         | WDR22       |
| 4156  | 170      | 134     | 1,27 | 0,030678 | 0,404 | 225080_at   | Myosin IC                                                   | MYO1C       |
| 4575  | 18,8     | 14,8    | 1,27 | 0,034585 | 0,412 | 205180_s_at | ADAM metallopeptidase domain 8                              | ADAM8       |
| 3906  | 116      | 91,0    | 1,27 | 0,028522 | 0,399 | 218244_at   | Nucleolar protein 8                                         | NOL8        |
| 3854  | 6,52     | 5,13    | 1,27 | 0,028142 | 0,399 | 1556650_at  | Autism susceptibility candidate 2                           | AUTS2       |
| 6065  | 77,8     | 61,3    | 1,27 | 0,049473 | 0,446 | 240277_at   | Solute carrier family 30 (zinc transporter), member 7       | SLC30A7     |
| 814   | 10,4     | 8,23    | 1,27 | 0,004655 | 0,312 | 222438_at   | Mediator complex subunit 4                                  | MED4        |
| 4399  | 12,1     | 9,55    | 1,27 | 0,032786 | 0,407 | 238342_at   | Hypothetical protein LOC283846                              | LOC283846   |
| 1183  | 4,53     | 3,57    | 1,27 | 0,006957 | 0,322 | 1557036_at  | Zinc finger and BTB domain containing 1                     | ZBTB1       |
| 3006  | 11,1     | 8,77    | 1,27 | 0,021167 | 0,385 | 230542_at   | Zinc finger protein 597                                     | ZNF597      |
| 3925  | 11,3     | 8,87    | 1,27 | 0,028693 | 0,399 | 206652_at   | Zinc finger, MYM-type 5                                     | ZMYM5       |
| 6055  | 144      | 113     | 1,27 | 0,049379 | 0,446 | 213026_at   | ATG12 autophagy related 12 homolog (S. cerevisiae)          | ATG12       |
| 2800  | 67,8     | 53,4    | 1,27 | 0,019466 | 0,380 | 219024_at   | Pleckstrin homology domain containing, family A member 1    | PLEKHA1     |

| Index | Mutated* | Normal* | FC   | P value  | FDR** | Probe set   | Description                                                                 | Gene symbol     |
|-------|----------|---------|------|----------|-------|-------------|-----------------------------------------------------------------------------|-----------------|
| 4196  | 20,6     | 16,3    | 1,27 | 0,030996 | 0,404 | 240723_at   | Enah/Vasp-like                                                              | <i>EVL</i>      |
| 3499  | 136      | 107     | 1,27 | 0,025144 | 0,392 | 214773_x_at | TIP41, TOR signaling pathway regulator-like ( <i>S. cerevisiae</i> )        | <i>TIPRL</i>    |
| 5810  | 374      | 295     | 1,27 | 0,046927 | 0,442 | 226214_at   | Membrane interacting protein of RGS16                                       | <i>MIR16</i>    |
| 1635  | 6,21     | 4,90    | 1,27 | 0,010310 | 0,344 | 240829_at   | Peroxisomal biogenesis factor 3                                             | <i>PEX3</i>     |
| 4342  | 30,1     | 23,8    | 1,27 | 0,032332 | 0,407 | 206348_s_at | Pyruvate dehydrogenase kinase, isozyme 3                                    | <i>PKD3</i>     |
| 2342  | 78,3     | 61,8    | 1,27 | 0,015631 | 0,364 | 225398_at   | RNA pseudouridylate synthase domain containing 4                            | <i>RPUSD4</i>   |
| 1283  | 161      | 127     | 1,27 | 0,007640 | 0,325 | 218243_at   | RUN and FYVE domain containing 1                                            | <i>RUFY1</i>    |
| 1924  | 129      | 102     | 1,27 | 0,012518 | 0,355 | 224945_at   | BTB (POZ) domain containing 7                                               | <i>BTBD7</i>    |
| 3439  | 143      | 113     | 1,27 | 0,024624 | 0,391 | 222414_at   | Myeloid/lymphoid or mixed-lineage leukemia 3                                | <i>MLL3</i>     |
| 5755  | 23,3     | 18,4    | 1,27 | 0,046191 | 0,439 | 230164_at   | Zinc finger protein 621                                                     | <i>ZNF621</i>   |
| 4724  | 78,3     | 61,8    | 1,27 | 0,035738 | 0,414 | 215616_s_at | Jumonji domain containing 2B                                                | <i>JMJD2B</i>   |
| 3536  | 18,9     | 14,9    | 1,27 | 0,025437 | 0,393 | 216621_at   | Rho-associated, coiled-coil containing protein kinase 1                     | <i>ROCK1</i>    |
| 4735  | 69,8     | 55,1    | 1,27 | 0,035844 | 0,414 | 203481_at   | Chromosome 10 open reading frame 6                                          | <i>C10orf6</i>  |
| 3314  | 7,15     | 5,65    | 1,27 | 0,023558 | 0,388 | 243555_at   | Endothelin receptor type A                                                  | <i>EDNRA</i>    |
| 1291  | 12,7     | 10,1    | 1,27 | 0,007697 | 0,325 | 211094_s_at | Neurofibromin 1                                                             | <i>NF1</i>      |
| 4313  | 144      | 114     | 1,27 | 0,032102 | 0,407 | 209024_s_at | Synaptotagmin binding, cytoplasmic RNA interacting protein                  | <i>SYNCRIP</i>  |
| 3782  | 6,86     | 5,42    | 1,26 | 0,027532 | 0,398 | 1559697_a_a | cDNA clone YW24B11                                                          | -               |
| 3072  | 148      | 117     | 1,26 | 0,021670 | 0,385 | 234950_s_at | Ring finger and WD repeat domain 2                                          | <i>RFWD2</i>    |
| 2142  | 170      | 135     | 1,26 | 0,014101 | 0,360 | 202386_s_at | KIAA0430 protein                                                            | <i>KIAA0430</i> |
| 3765  | 35,0     | 27,7    | 1,26 | 0,027366 | 0,397 | 213100_at   | Unc-5 homolog B ( <i>C. elegans</i> )                                       | <i>UNC5B</i>    |
| 3948  | 77,1     | 60,9    | 1,26 | 0,028828 | 0,399 | 217496_s_at | Insulin-degrading enzyme                                                    | <i>IDE</i>      |
| 5317  | 79,5     | 62,9    | 1,26 | 0,041490 | 0,427 | 204084_s_at | Ceroid-lipofuscinosis, neuronal 5                                           | <i>CLN5</i>     |
| 5368  | 39,4     | 31,2    | 1,26 | 0,042143 | 0,429 | 219565_at   | Cytochrome P450, family 20, subfamily A, polypeptide 1                      | <i>CYP20A1</i>  |
| 454   | 352      | 278     | 1,26 | 0,002430 | 0,288 | 222389_s_at | WW domain containing adaptor with coiled-coil                               | <i>WAC</i>      |
| 1018  | 74,9     | 59,3    | 1,26 | 0,005886 | 0,316 | 63009_at    | SHQ1 homolog ( <i>S. cerevisiae</i> )                                       | <i>SHQ1</i>     |
| 3631  | 45,3     | 35,9    | 1,26 | 0,026255 | 0,395 | 214220_s_at | Alstrom syndrome 1                                                          | <i>ALMS1</i>    |
| 4269  | 44,1     | 34,9    | 1,26 | 0,031745 | 0,406 | 1556034_s_a | Myotubularin related protein 11                                             | <i>MTMR11</i>   |
| 1027  | 301      | 238     | 1,26 | 0,005943 | 0,316 | 217836_s_at | YY1 associated protein 1                                                    | <i>YY1AP1</i>   |
| 2901  | 152      | 121     | 1,26 | 0,020371 | 0,383 | 201613_s_at | Adaptor-related protein complex 1, gamma 2 subunit                          | <i>AP1G2</i>    |
| 4898  | 22,3     | 17,7    | 1,26 | 0,037472 | 0,418 | 204742_s_at | PDS5, regulator of cohesion maintenance, homolog B ( <i>S. cerevisiae</i> ) | <i>PDS5B</i>    |
| 4831  | 35,8     | 28,4    | 1,26 | 0,036802 | 0,416 | 219610_at   | Rho-guanine nucleotide exchange factor                                      | <i>RGNEF</i>    |
| 3881  | 323      | 256     | 1,26 | 0,028341 | 0,399 | 209102_s_at | HMG-box transcription factor 1                                              | <i>HBP1</i>     |
| 5677  | 82,9     | 65,7    | 1,26 | 0,045324 | 0,436 | 203972_s_at | Peroxisomal biogenesis factor 3                                             | <i>PEX3</i>     |
| 3958  | 104      | 82,4    | 1,26 | 0,028901 | 0,399 | 203035_s_at | Protein inhibitor of activated STAT, 3                                      | <i>PIAS3</i>    |
| 472   | 11,8     | 9,34    | 1,26 | 0,002513 | 0,289 | 241152_at   | Family with sequence similarity 120B                                        | <i>FAM120B</i>  |
| 6017  | 11,7     | 9,29    | 1,26 | 0,048969 | 0,445 | 213067_at   | Myosin, heavy chain 10, non-muscle                                          | <i>MYH10</i>    |
| 3964  | 308      | 244     | 1,26 | 0,028956 | 0,399 | 201132_at   | Heterogeneous nuclear ribonucleoprotein H2                                  | <i>HNRPH2</i>   |
| 2462  | 354      | 281     | 1,26 | 0,016522 | 0,367 | 201301_s_at | Annexin A4                                                                  | <i>ANXA4</i>    |
| 3089  | 329      | 261     | 1,26 | 0,021783 | 0,385 | 201153_s_at | Muscleblind-like ( <i>Drosophila</i> )                                      | <i>MBNL1</i>    |
| 4614  | 286      | 227     | 1,26 | 0,034830 | 0,412 | 224570_s_at | Interferon regulatory factor 2 binding protein 2                            | <i>IRF2BP2</i>  |
| 2072  | 285      | 227     | 1,26 | 0,013542 | 0,356 | 234969_s_at | Enhancer of polycomb homolog 1 ( <i>Drosophila</i> )                        | <i>EPC1</i>     |
| 3853  | 9,22     | 7,32    | 1,26 | 0,028139 | 0,399 | 235784_at   | Mitochondrial transcription termination factor                              | <i>MTERF</i>    |
| 2482  | 7,45     | 5,91    | 1,26 | 0,016728 | 0,367 | 206010_at   | Hyaluronan binding protein 2                                                | <i>HABP2</i>    |
| 4742  | 226      | 179     | 1,26 | 0,035914 | 0,414 | 225284_at   | DnaJ (Hsp40) homolog, subfamily C, member 3                                 | <i>DNAJC3</i>   |
| 4449  | 56,4     | 44,8    | 1,26 | 0,033417 | 0,411 | 200702_s_at | DEAD (Asp-Glu-Ala-Asp) box polypeptide 24                                   | <i>DDX24</i>    |
| 4491  | 559      | 445     | 1,26 | 0,033777 | 0,411 | 212952_at   | Calreticulin                                                                | <i>CALR</i>     |
| 5063  | 6,69     | 5,32    | 1,26 | 0,038964 | 0,420 | 242007_at   | Primary neuroblastoma cDNA, clone:Nbla03526, full insert sequence           | -               |
| 3834  | 833      | 662     | 1,26 | 0,028012 | 0,399 | 200810_s_at | Cold inducible RNA binding protein                                          | <i>CIRBP</i>    |
| 5563  | 14,7     | 11,7    | 1,26 | 0,044296 | 0,435 | 226637_at   | Ubiquitin-conjugating enzyme E2H (UBC8 homolog, yeast)                      | <i>UBE2H</i>    |
| 1821  | 7,77     | 6,18    | 1,26 | 0,011725 | 0,351 | 219834_at   | Calcium-response factor                                                     | <i>ALS2CR8</i>  |
| 3897  | 25,0     | 19,9    | 1,26 | 0,028465 | 0,399 | 238722_x_at | N-acyl-phosphatidylethanolamine-hydrolyzing phospholipase D                 | <i>NAPE-PLD</i> |
| 1618  | 128      | 102     | 1,26 | 0,010167 | 0,343 | 203530_s_at | Syntaxin 4                                                                  | <i>STX4</i>     |
| 4158  | 808      | 643     | 1,26 | 0,030724 | 0,404 | 201121_s_at | Progesterone receptor membrane component 1                                  | <i>PGRMC1</i>   |
| 4707  | 137      | 109     | 1,26 | 0,035583 | 0,413 | 201529_s_at | Replication protein A1, 70kDa                                               | <i>RPA1</i>     |
| 2443  | 157      | 125     | 1,26 | 0,016345 | 0,366 | 224834_at   | Ubiquitin domain containing 2                                               | <i>UBTD2</i>    |
| 2177  | 5,74     | 4,57    | 1,26 | 0,014405 | 0,361 | 242985_x_at | Ring finger protein 180                                                     | <i>RNF180</i>   |
| 1831  | 12,2     | 9,71    | 1,26 | 0,011795 | 0,351 | 1565620_at  | Centaurin, gamma-like family, member 1                                      | <i>CTGLF1</i>   |

| Index | Mutated* | Normal* | FC   | P value  | FDR** | Probe set   | Description                                                       | Gene symbol |
|-------|----------|---------|------|----------|-------|-------------|-------------------------------------------------------------------|-------------|
| 5478  | 9,00     | 7,17    | 1,26 | 0,043318 | 0,432 | 229669_at   | Hypothetical gene supported by BC072410                           | LOC440416   |
| 3255  | 152      | 121     | 1,26 | 0,023112 | 0,388 | 227864_s_at | Family with sequence similarity 125, member A                     | FAM125A     |
| 5185  | 71,5     | 57,0    | 1,25 | 0,039966 | 0,421 | 212840_at   | UBX domain containing 7                                           | UBXD7       |
| 1262  | 8,22     | 6,55    | 1,25 | 0,007513 | 0,325 | 232722_at   | Ribonuclease T2                                                   | RNASET2     |
| 5693  | 39,0     | 31,1    | 1,25 | 0,045552 | 0,437 | 238783_at   | Transmembrane protein 161B                                        | TMEM161B    |
| 5157  | 365      | 291     | 1,25 | 0,039709 | 0,421 | 201887_at   | Interleukin 13 receptor, alpha 1                                  | IL13RA1     |
| 5105  | 15,4     | 12,3    | 1,25 | 0,039278 | 0,421 | 223400_s_at | Polybromo 1                                                       | PBRM1       |
| 5138  | 285      | 227     | 1,25 | 0,039549 | 0,421 | 223306_at   | Emopamil binding protein-like                                     | EBPL        |
| 2239  | 176      | 140     | 1,25 | 0,014886 | 0,363 | 218142_s_at | Cereblon                                                          | CRBN        |
| 3167  | 8,58     | 6,85    | 1,25 | 0,022473 | 0,387 | 1560026_at  | Hypothetical protein LOC149402                                    | LOC149401   |
| 6013  | 25,4     | 20,3    | 1,25 | 0,048892 | 0,445 | 213252_at   | SH3 and PX domains 2A                                             | SH3PXD2A    |
| 921   | 4,73     | 3,77    | 1,25 | 0,005307 | 0,313 | 206033_s_at | Desmocollin 3                                                     | DSC3        |
| 3601  | 43,8     | 35,0    | 1,25 | 0,025975 | 0,394 | 204423_at   | Muskelin 1, intracellular mediator containing kelch motifs        | MKLN1       |
| 4371  | 168      | 134     | 1,25 | 0,032522 | 0,407 | 218528_s_at | Ring finger protein 38                                            | RNF38       |
| 3305  | 117      | 93,5    | 1,25 | 0,023512 | 0,388 | 209175_at   | SEC23 interacting protein                                         | SEC23IP     |
| 4247  | 192      | 153     | 1,25 | 0,031536 | 0,406 | 225264_at   | Arginyl-tRNA synthetase 2, mitochondrial (putative)               | RARS2       |
| 5378  | 6,05     | 4,83    | 1,25 | 0,042175 | 0,429 | 216683_at   | Tubulin folding cofactor A                                        | TBCA        |
| 4170  | 12,3     | 9,82    | 1,25 | 0,030811 | 0,404 | 235471_at   | Chromosome 10 open reading frame 72                               | C10orf72    |
| 4143  | 19,4     | 15,5    | 1,25 | 0,030568 | 0,403 | 243659_at   | Elongation factor, RNA polymerase II, 2                           | ELL2        |
| 5324  | 611      | 488     | 1,25 | 0,041620 | 0,427 | 208623_s_at | Villin 2 (ezrin)                                                  | VIL2        |
| 749   | 30,1     | 24,0    | 1,25 | 0,004248 | 0,308 | 1556067_a_a | Jumonji domain containing 3                                       | JMJD3       |
| 4584  | 71,5     | 57,2    | 1,25 | 0,034644 | 0,412 | 226323_at   | Coiled-coil domain containing 16                                  | CCDC16      |
| 3041  | 170      | 136     | 1,25 | 0,021427 | 0,385 | 201813_s_at | TBC1 domain family, member 5                                      | TBC1D5      |
| 1639  | 247      | 197     | 1,25 | 0,010332 | 0,344 | 203250_at   | RNA binding motif protein 16                                      | RBM16       |
| 2736  | 7,87     | 6,29    | 1,25 | 0,018875 | 0,377 | 237208_at   | WD repeat domain 61                                               | WDR61       |
| 5216  | 12,0     | 9,60    | 1,25 | 0,040304 | 0,422 | 239957_at   | SET domain containing 5                                           | SETD5       |
| 143   | 9,42     | 7,53    | 1,25 | 0,000653 | 0,244 | 244168_s_at | Unc-51-like kinase 4 (C. elegans)                                 | ULK4        |
| 5760  | 68,9     | 55,1    | 1,25 | 0,046272 | 0,439 | 209533_s_at | Phospholipase A2-activating protein                               | PLAA        |
| 3204  | 288      | 230     | 1,25 | 0,022686 | 0,387 | 225032_at   | Fibronectin type III domain containing 3B                         | FNDC3B      |
| 1163  | 11,0     | 8,83    | 1,25 | 0,006851 | 0,321 | 242280_x_at | Cytoplasmic polyadenylation element binding protein 4             | CPEB4       |
| 3494  | 10,7     | 8,52    | 1,25 | 0,025115 | 0,392 | 1565567_at  | Syntaxin 7                                                        | STX7        |
| 5572  | 179      | 143     | 1,25 | 0,044389 | 0,435 | 209432_s_at | cAMP responsive element binding protein 3                         | CREB3       |
| 5423  | 279      | 223     | 1,25 | 0,042677 | 0,430 | 212287_at   | Suppressor of zeste 12 homolog (Drosophila)                       | SUZ12       |
| 4941  | 70,1     | 56,0    | 1,25 | 0,037913 | 0,419 | 219530_at   | Partner and localizer of BRCA2                                    | PALB2       |
| 5722  | 186      | 149     | 1,25 | 0,045857 | 0,438 | 221825_at   | Angel homolog 2 (Drosophila)                                      | ANGEL2      |
| 5645  | 62,1     | 49,7    | 1,25 | 0,045052 | 0,436 | 213412_at   | Tight junction protein 3 (zona occludens 3)                       | TJP3        |
| 3830  | 102      | 81,5    | 1,25 | 0,027976 | 0,399 | 226073_at   | Transmembrane protein 218                                         | TMEM218     |
| 282   | 14,3     | 11,4    | 1,25 | 0,001387 | 0,263 | 220171_x_at | KIAA1704 protein                                                  | KIAA1704    |
| 1902  | 195      | 156     | 1,25 | 0,012370 | 0,355 | 218082_s_at | Upstream binding protein 1 (LBP-1a)                               | UBP1        |
| 518   | 249      | 199     | 1,25 | 0,002756 | 0,291 | 202122_s_at | Mannose-6-phosphate receptor binding protein 1                    | M6PRBP1     |
| 5092  | 154      | 123     | 1,25 | 0,039177 | 0,420 | 222148_s_at | RAS homolog gene family, member T1                                | RHOT1       |
| 2577  | 77,8     | 62,3    | 1,25 | 0,017485 | 0,371 | 201085_s_at | SON DNA binding protein                                           | SON         |
| 2866  | 21,9     | 17,5    | 1,25 | 0,020114 | 0,383 | 204501_at   | Nephroblastoma overexpressed gene                                 | NOV         |
| 2147  | 9,32     | 7,46    | 1,25 | 0,014131 | 0,360 | 205503_at   | Protein tyrosine phosphatase, non-receptor type 14                | PTPN14      |
| 4916  | 104      | 82,9    | 1,25 | 0,037628 | 0,418 | 226155_at   | Family with sequence similarity 160, member B1                    | FAM161B1    |
| 4103  | 27,7     | 22,2    | 1,25 | 0,030150 | 0,402 | 205205_at   | V-rel reticuloendotheliosis viral oncogene homolog B              | RELB        |
| 3480  | 88,8     | 71,1    | 1,25 | 0,024981 | 0,392 | 202725_at   | Polymerase (RNA) II (DNA directed) polypeptide A, 220kDa          | POLR2A      |
| 6029  | 23,2     | 18,6    | 1,25 | 0,049057 | 0,445 | 230592_at   | NSL1, MIND kinetochore complex component, homolog (S. cerevisiae) | NSL1        |
| 6035  | 14,3     | 11,4    | 1,25 | 0,049118 | 0,445 | 229794_at   | Zinc finger protein 585A                                          | ZNF585A     |
| 5721  | 83,6     | 67,0    | 1,25 | 0,045828 | 0,438 | 235056_at   | Ets variant gene 6 (TEL oncogene)                                 | ETV6        |
| 2884  | 231      | 185     | 1,25 | 0,020237 | 0,383 | 209484_s_at | NSL1, MIND kinetochore complex component, homolog (S. cerevisiae) | NSL1        |
| 434   | 9,57     | 7,67    | 1,25 | 0,002286 | 0,288 | 238851_at   | Ankyrin repeat domain 13A                                         | ANKRD13A    |
| 5670  | 384      | 308     | 1,25 | 0,045249 | 0,436 | 213455_at   | Family with sequence similarity 114, member A1                    | FAM114A1    |
| 3465  | 182      | 146     | 1,25 | 0,024833 | 0,392 | 231968_at   | UDP-glucose glycoprotein glucosyltransferase 1                    | UGCG1       |
| 4133  | 74,1     | 59,4    | 1,25 | 0,030413 | 0,402 | 218221_at   | Aryl hydrocarbon receptor nuclear translocator                    | ARNT        |
| 3415  | 6,87     | 5,51    | 1,25 | 0,024385 | 0,390 | 1569512_at  | Supervillin                                                       | SVIL        |
| 2739  | 218      | 175     | 1,25 | 0,018899 | 0,377 | 200596_s_at | Eukaryotic translation initiation factor 3, subunit A             | EIF3A       |



| Index | Mutated* | Normal* | FC   | P value  | FDR** | Probe set   | Description                                                    | Gene symbol         |
|-------|----------|---------|------|----------|-------|-------------|----------------------------------------------------------------|---------------------|
| 3821  | 10,8     | 8,66    | 1,25 | 0,027890 | 0,399 | 234151_at   | CUG triplet repeat, RNA binding protein 2                      | <i>CUGBP2</i>       |
| 4321  | 66,2     | 53,1    | 1,25 | 0,032173 | 0,407 | 238653_at   | Leucine-rich repeats and immunoglobulin-like domains 2         | <i>LRIG2</i>        |
| 4595  | 105      | 84,4    | 1,25 | 0,034766 | 0,412 | 225317_at   | Acyl-Coenzyme A binding domain containing 6                    | <i>ACBD6</i>        |
| 3899  | 14,7     | 11,8    | 1,25 | 0,028482 | 0,399 | 226627_at   | Septin 8                                                       | <i>SEPT8</i>        |
| 4922  | 39,2     | 31,4    | 1,25 | 0,037708 | 0,419 | 206853_s_at | Mitogen-activated protein kinase kinase kinase 7               | <i>MAP3K7</i>       |
| 4023  | 117      | 94,0    | 1,25 | 0,029457 | 0,400 | 239891_x_at | RAB12, member RAS oncogene family                              | <i>RAB12</i>        |
| 4229  | 12,5     | 10,1    | 1,25 | 0,031335 | 0,405 | 238243_at   | cDNA clone YI43B12                                             | -                   |
| 4324  | 299      | 240     | 1,25 | 0,032183 | 0,407 | 202038_at   | Ubiquitination factor E4A (UFD2 homolog, yeast)                | <i>UBE4A</i>        |
| 2037  | 6,11     | 4,91    | 1,25 | 0,013271 | 0,355 | 223867_at   | Tektin 3                                                       | <i>TEKT3</i>        |
| 1045  | 121      | 97,4    | 1,25 | 0,006113 | 0,319 | 201473_at   | Jun B proto-oncogene                                           | <i>JUNB</i>         |
| 5222  | 1013     | 814     | 1,24 | 0,040381 | 0,423 | 201170_s_at | Basic helix-loop-helix domain containing, class B, 2           | <i>BHLHB2</i>       |
| 5426  | 564      | 453     | 1,24 | 0,042688 | 0,430 | 200760_s_at | ADP-ribosylation-like factor 6 interacting protein 5           | <i>ARL6IP5</i>      |
| 3500  | 82,7     | 66,4    | 1,24 | 0,025153 | 0,392 | 203723_at   | Inositol 1,4,5-trisphosphate 3-kinase B                        | <i>ITPKB</i>        |
| 5907  | 123      | 99,0    | 1,24 | 0,047874 | 0,443 | 212538_at   | Dedicator of cytokinesis 9                                     | <i>DOCK9</i>        |
| 1652  | 341      | 274     | 1,24 | 0,010398 | 0,344 | 215088_s_at | Succinate dehydrogenase cytochrome b560 subunit, mitochondrial | <i>SDHC</i>         |
| 5003  | 261      | 210     | 1,24 | 0,038419 | 0,420 | 201845_s_at | RING1 and YY1 binding protein                                  | <i>RYBP</i>         |
| 553   | 5,31     | 4,27    | 1,24 | 0,003007 | 0,296 | 239571_at   | Myocyte enhancer factor 2A                                     | <i>MEF2A</i>        |
| 462   | 253      | 204     | 1,24 | 0,002457 | 0,288 | 212086_x_at | Lamin A/C                                                      | <i>LMNA</i>         |
| 1322  | 8,33     | 6,70    | 1,24 | 0,007893 | 0,326 | 39548_at    | Neuronal PAS domain protein 2                                  | <i>NPAS2</i>        |
| 3453  | 116      | 93,6    | 1,24 | 0,024725 | 0,391 | 221786_at   | Chromosome 6 open reading frame 120                            | <i>C6orf120</i>     |
| 4039  | 123      | 98,6    | 1,24 | 0,029594 | 0,401 | 225050_at   | Zinc finger protein 512                                        | <i>ZNF512</i>       |
| 5410  | 189      | 152     | 1,24 | 0,042490 | 0,429 | 226126_at   | TBC1 domain containing kinase                                  | <i>TBCK</i>         |
| 5637  | 94,9     | 76,3    | 1,24 | 0,044983 | 0,436 | 226178_at   | Suppressor of cytokine signaling 4                             | <i>SOCS4</i>        |
| 5777  | 103      | 82,5    | 1,24 | 0,046501 | 0,440 | 223269_at   | Polymerase (RNA) III (DNA directed) polypeptide G (32kd)-like  | <i>POLR3GL</i>      |
| 3445  | 104      | 83,8    | 1,24 | 0,024655 | 0,391 | 212603_at   | Mitochondrial ribosomal protein S31                            | <i>MRPS31</i>       |
| 1270  | 58,8     | 47,3    | 1,24 | 0,007545 | 0,325 | 204711_at   | KIAA0753 protein                                               | <i>KIAA0753</i>     |
| 3431  | 93,5     | 75,3    | 1,24 | 0,024567 | 0,391 | 214429_at   | Myotubularin related protein 6                                 | <i>MTMR6</i>        |
| 2015  | 58,6     | 47,2    | 1,24 | 0,013146 | 0,355 | 222955_s_at | Family with sequence similarity 45, member A                   | <i>FAM45A</i>       |
| 5198  | 137      | 110     | 1,24 | 0,040105 | 0,422 | 223007_s_at | Chromosome 9 open reading frame 5                              | <i>C9orf5</i>       |
| 1305  | 13,4     | 10,8    | 1,24 | 0,007774 | 0,325 | 221854_at   | Plakophilin 1                                                  | <i>PKP1</i>         |
| 3236  | 113      | 90,7    | 1,24 | 0,022942 | 0,388 | 207513_s_at | Zinc finger protein 189                                        | <i>ZNF189</i>       |
| 4701  | 9,74     | 7,85    | 1,24 | 0,035496 | 0,413 | 207016_s_at | Aldehyde dehydrogenase 1 family, member A2                     | <i>ALDH1A2</i>      |
| 2474  | 16,0     | 12,9    | 1,24 | 0,016644 | 0,367 | 228913_at   | Hypothetical protein LOC100190939                              | <i>LOC100190939</i> |
| 2357  | 216      | 174     | 1,24 | 0,015726 | 0,364 | 203338_at   | Protein phosphatase 2, regulatory subunit B', epsilon isoform  | <i>PPP2R5E</i>      |
| 5704  | 134      | 108     | 1,24 | 0,045657 | 0,438 | 204771_s_at | Transcription termination factor, RNA polymerase I             | <i>TTF1</i>         |
| 3182  | 181      | 146     | 1,24 | 0,022556 | 0,387 | 224445_s_at | Zinc finger, FYVE domain containing 21                         | <i>ZFYVE21</i>      |
| 3887  | 92,3     | 74,4    | 1,24 | 0,028395 | 0,399 | 1555789_s_a | Nucleoporin 98kDa                                              | <i>NUP98</i>        |
| 1152  | 4,69     | 3,78    | 1,24 | 0,006776 | 0,321 | 1553894_at  | Coiled-coil domain containing 122                              | <i>CCDC122</i>      |
| 3173  | 79,3     | 64,0    | 1,24 | 0,022506 | 0,387 | 213940_s_at | Formin binding protein 1                                       | <i>FNBP1</i>        |
| 2775  | 109      | 87,6    | 1,24 | 0,019266 | 0,380 | 205917_at   | Zinc finger protein 264                                        | <i>ZNF264</i>       |
| 5607  | 79,7     | 64,3    | 1,24 | 0,044717 | 0,436 | 223221_at   | SCO cytochrome oxidase deficient homolog 1 (yeast)             | <i>SCO1</i>         |
| 606   | 8,30     | 6,70    | 1,24 | 0,003362 | 0,303 | 215428_at   | tight junction protein 1 (zona occludens 1)                    | <i>TJP1</i>         |
| 2511  | 73,0     | 58,9    | 1,24 | 0,016885 | 0,368 | 209073_s_at | Numb homolog (Drosophila)                                      | <i>NUMB</i>         |
| 478   | 9,72     | 7,85    | 1,24 | 0,002562 | 0,289 | 227226_at   | Chromosome 6 open reading frame 117                            | <i>C6orf117</i>     |
| 4797  | 41,6     | 33,6    | 1,24 | 0,036388 | 0,415 | 224304_x_at | Ninein (GSK3B interacting protein)                             | <i>NIN</i>          |
| 4789  | 47,4     | 38,3    | 1,24 | 0,036311 | 0,415 | 1554762_a_a | WW and C2 domain containing 2                                  | <i>WWC2</i>         |
| 497   | 24,2     | 19,5    | 1,24 | 0,002648 | 0,289 | 240095_at   | Transcribed locus                                              | -                   |
| 4442  | 96,7     | 78,0    | 1,24 | 0,033367 | 0,411 | 204908_s_at | B-cell CLL/lymphoma 3                                          | <i>BCL3</i>         |
| 3792  | 153      | 123     | 1,24 | 0,027619 | 0,398 | 213123_at   | Microfibrillar-associated protein 3                            | <i>MFAP3</i>        |
| 4118  | 234      | 189     | 1,24 | 0,030275 | 0,402 | 224572_s_at | Interferon regulatory factor 2 binding protein 2               | <i>IRF2BP2</i>      |
| 5973  | 17,0     | 13,7    | 1,24 | 0,048503 | 0,444 | 227839_at   | Methyl-CpG binding domain protein 5                            | <i>MBD5</i>         |
| 1834  | 4,51     | 3,65    | 1,24 | 0,011808 | 0,351 | 232958_at   | phosphorylase, glycogen                                        | <i>PYGL</i>         |
| 4512  | 135      | 109     | 1,24 | 0,034012 | 0,412 | 219276_x_at | Chromosome 9 open reading frame 82                             | <i>C9orf82</i>      |
| 4553  | 493      | 398     | 1,24 | 0,034415 | 0,412 | 200765_x_at | Catenin (cadherin-associated protein), alpha 1, 102kDa         | <i>CTNNA1</i>       |
| 5084  | 51,1     | 41,3    | 1,24 | 0,039131 | 0,420 | 213736_at   | Cytochrome c oxidase subunit Vb                                | <i>COX5B</i>        |
| 2666  | 12,0     | 9,70    | 1,24 | 0,018229 | 0,374 | 239162_at   | Death-associated protein kinase 1                              | <i>DAPK1</i>        |
| 5673  | 236      | 191     | 1,24 | 0,045279 | 0,436 | 228992_at   | Mediator complex subunit 28                                    | <i>MED28</i>        |

| Index | Mutated* | Normal* | FC   | P value  | FDR** | Probe set   | Description                                                  | Gene symbol      |
|-------|----------|---------|------|----------|-------|-------------|--------------------------------------------------------------|------------------|
| 1641  | 202      | 163     | 1,24 | 0,010340 | 0,344 | 221699_s_at | DEAD (Asp-Glu-Ala-Asp) box polypeptide 50                    | <i>DDX50</i>     |
| 3391  | 57,7     | 46,7    | 1,24 | 0,024157 | 0,389 | 214672_at   | Tubulin tyrosine ligase-like family, member 5                | <i>TTL5</i>      |
| 1836  | 143      | 115     | 1,24 | 0,011814 | 0,351 | 218572_at   | Chromatin modifying protein 4A                               | <i>CHMP4A</i>    |
| 5475  | 33,0     | 26,7    | 1,24 | 0,043287 | 0,432 | 232724_at   | Membrane-spanning 4-domains, subfamily A, member 6A          | <i>MS4A6A</i>    |
| 2922  | 30,5     | 24,7    | 1,24 | 0,020495 | 0,383 | 216174_at   | Hepatocellular carcinoma-related HCRP1                       | <i>HCRP1</i>     |
| 4656  | 172      | 139     | 1,24 | 0,035159 | 0,413 | 203447_at   | Proteasome (prosome, macropain) 26S subunit, non-ATPase, 5   | <i>PSMD5</i>     |
| 5885  | 33,0     | 26,7    | 1,24 | 0,047614 | 0,442 | 241348_at   | Zinc finger protein 654                                      | <i>ZNF654</i>    |
| 2860  | 92,4     | 74,7    | 1,24 | 0,020095 | 0,383 | 223182_s_at | 1-acylglycerol-3-phosphate O-acyltransferase 3               | <i>AGPAT3</i>    |
| 5331  | 9,85     | 7,97    | 1,24 | 0,041741 | 0,428 | 1560112_at  | WD repeat and FYVE domain containing 2                       | <i>WDFY2</i>     |
| 3794  | 95,6     | 77,4    | 1,24 | 0,027639 | 0,398 | 220326_s_at | Hypothetical protein FLJ10357                                | <i>FLJ10357</i>  |
| 5186  | 21,6     | 17,5    | 1,24 | 0,039970 | 0,421 | 239266_at   | Small nucleolar RNA host gene 5 (non-protein coding)         | <i>SNHG5</i>     |
| 3512  | 26,2     | 21,2    | 1,23 | 0,025218 | 0,392 | 226220_at   | Methyltransferase like 9                                     | <i>METTL9</i>    |
| 665   | 32,1     | 26,0    | 1,23 | 0,003832 | 0,308 | 227411_at   | Wilms tumor 1 interacting protein                            | <i>WTIP</i>      |
| 788   | 5,27     | 4,27    | 1,23 | 0,004507 | 0,311 | 239661_at   | AF4/FMR2 family, member 1                                    | <i>AFF1</i>      |
| 3974  | 879      | 712     | 1,23 | 0,029043 | 0,400 | 210844_x_at | Catenin (cadherin-associated protein), alpha 1, 102kDa       | <i>CTNNA1</i>    |
| 5046  | 179      | 145     | 1,23 | 0,038889 | 0,420 | 212694_s_at | Propionyl Coenzyme A carboxylase, beta polypeptide           | <i>PCCB</i>      |
| 186   | 38,8     | 31,5    | 1,23 | 0,000862 | 0,244 | 223401_at   | Chromosome 17 open reading frame 48                          | <i>C17orf48</i>  |
| 3259  | 128      | 104     | 1,23 | 0,023143 | 0,388 | 222531_s_at | Chromosome 14 open reading frame 108                         | <i>C14orf108</i> |
| 1864  | 7,63     | 6,19    | 1,23 | 0,012028 | 0,353 | 243826_at   | Nuclear receptor coactivator 1                               | <i>NCOA1</i>     |
| 6043  | 126      | 102     | 1,23 | 0,049222 | 0,445 | 225159_s_at | Mediator complex subunit 28                                  | <i>MED28</i>     |
| 3517  | 133      | 108     | 1,23 | 0,025251 | 0,392 | 218616_at   | Integrator complex subunit 12                                | <i>INTS12</i>    |
| 1815  | 227      | 184     | 1,23 | 0,011710 | 0,351 | 226347_at   | Fucosyltransferase 11 (alpha (1,3) fucosyltransferase)       | <i>FUT11</i>     |
| 2933  | 44,5     | 36,1    | 1,23 | 0,020572 | 0,383 | 219169_s_at | Transcription factor B1, mitochondrial                       | <i>TFB1M</i>     |
| 2883  | 867      | 703     | 1,23 | 0,020225 | 0,383 | 200797_s_at | Myeloid cell leukemia sequence 1 (BCL2-related)              | <i>MCL1</i>      |
| 2962  | 795      | 645     | 1,23 | 0,020812 | 0,384 | 224731_at   | High-mobility group box 1                                    | <i>HMGB1</i>     |
| 4318  | 137      | 111     | 1,23 | 0,032157 | 0,407 | 203719_at   | DNA excision repair protein ERCC-1                           | <i>ERCC1</i>     |
| 1261  | 187      | 152     | 1,23 | 0,007505 | 0,325 | 202225_at   | v-crk sarcoma virus CT10 oncogene homolog                    | <i>CRK</i>       |
| 3559  | 130      | 105     | 1,23 | 0,025693 | 0,394 | 212264_s_at | Wings apart-like homolog (Drosophila)                        | <i>WAPAL</i>     |
| 4360  | 63,7     | 51,8    | 1,23 | 0,032427 | 0,407 | 218873_at   | Gon-4-like (C. elegans)                                      | <i>GON4L</i>     |
| 3971  | 23,8     | 19,3    | 1,23 | 0,029015 | 0,399 | 212758_s_at | Zinc finger E-box binding homeobox 1                         | <i>ZEB1</i>      |
| 5250  | 41,7     | 33,9    | 1,23 | 0,040672 | 0,423 | 203254_s_at | Talin 1                                                      | <i>TLN1</i>      |
| 1800  | 27,0     | 22,0    | 1,23 | 0,011584 | 0,351 | 204136_at   | Collagen, type VII, alpha 1                                  | <i>COL7A1</i>    |
| 1022  | 12,7     | 10,4    | 1,23 | 0,005924 | 0,316 | 230305_at   | Transcribed locus                                            | -                |
| 2360  | 40,8     | 33,2    | 1,23 | 0,015746 | 0,364 | 213728_at   | Lysosomal-associated membrane protein 1                      | <i>LAMP1</i>     |
| 4805  | 7,07     | 5,75    | 1,23 | 0,036468 | 0,415 | 1555123_at  | ST6 beta-galactosamide alpha-2,6-sialyltransferase 2         | <i>ST6GAL2</i>   |
| 3728  | 14,3     | 11,6    | 1,23 | 0,027064 | 0,397 | 1558445_at  | cDNA clone IMAGE:5277883                                     | -                |
| 3783  | 118      | 95,6    | 1,23 | 0,027558 | 0,398 | 201624_at   | Aspartyl-tRNA synthetase                                     | <i>DARS</i>      |
| 4781  | 223      | 181     | 1,23 | 0,036268 | 0,414 | 212066_s_at | Ubiquitin specific peptidase 34                              | <i>USP34</i>     |
| 3538  | 253      | 206     | 1,23 | 0,025451 | 0,393 | 225144_at   | Bone morphogenetic protein receptor, type II                 | <i>BMPR2</i>     |
| 6120  | 446      | 362     | 1,23 | 0,049977 | 0,446 | 222431_at   | Spindlin 1                                                   | <i>SPIN1</i>     |
| 3590  | 6,34     | 5,16    | 1,23 | 0,025896 | 0,394 | 242856_at   | cDNA FLJ10247 fis, clone HEMBB1000705                        | -                |
| 4579  | 43,9     | 35,7    | 1,23 | 0,034610 | 0,412 | 203592_s_at | Follistatin-like 3 (secreted glycoprotein)                   | <i>FSTL3</i>     |
| 2618  | 5,28     | 4,30    | 1,23 | 0,017785 | 0,371 | 206983_at   | Chemokine (C-C motif) receptor 6                             | <i>CCR6</i>      |
| 1429  | 7,96     | 6,48    | 1,23 | 0,008672 | 0,331 | 243648_at   | Zinc finger CCCH-type containing 11A                         | <i>ZC3H11A</i>   |
| 6025  | 468      | 381     | 1,23 | 0,049022 | 0,445 | 200798_x_at | Myeloid cell leukemia sequence 1 (BCL2-related)              | <i>MCL1</i>      |
| 5744  | 89,6     | 72,9    | 1,23 | 0,046078 | 0,439 | 213063_at   | Zinc finger CCCH-type containing 14                          | <i>ZC3H14</i>    |
| 1470  | 4,76     | 3,88    | 1,23 | 0,008989 | 0,334 | 233139_at   | Ataxin 2-binding protein 1                                   | <i>A2BP1</i>     |
| 383   | 300      | 245     | 1,23 | 0,001992 | 0,284 | 218571_s_at | Chromatin modifying protein 4A                               | <i>CHMP4A</i>    |
| 2740  | 57,2     | 46,6    | 1,23 | 0,018900 | 0,377 | 220935_s_at | CDK5 regulatory subunit associated protein 2                 | <i>CDK5RAP2</i>  |
| 4962  | 185      | 151     | 1,23 | 0,038055 | 0,419 | 218139_s_at | Chromosome 14 open reading frame 108                         | <i>C14orf108</i> |
| 3746  | 24,9     | 20,3    | 1,23 | 0,027243 | 0,397 | 232637_at   | Septin 2                                                     | <i>SEPT2</i>     |
| 6057  | 642      | 523     | 1,23 | 0,049408 | 0,446 | 208636_at   | Actinin, alpha 1                                             | <i>ACTN1</i>     |
| 5176  | 27,7     | 22,5    | 1,23 | 0,039888 | 0,421 | 209203_s_at | Bicaudal D homolog 2 (Drosophila)                            | <i>BICD2</i>     |
| 2876  | 9,83     | 8,01    | 1,23 | 0,020194 | 0,383 | 231471_at   | zinc finger protein 638                                      | <i>ZNF638</i>    |
| 5960  | 247      | 201     | 1,23 | 0,048384 | 0,444 | 225336_at   | Splicing factor, arginine/serine-rich 2, interacting protein | <i>SFRS2IP</i>   |
| 997   | 4,72     | 3,85    | 1,23 | 0,005755 | 0,316 | 238297_at   | Phosphatase and actin regulator 1                            | <i>PHACTR1</i>   |
| 572   | 212      | 173     | 1,23 | 0,003144 | 0,300 | 243_g_at    | Microtubule-associated protein 4                             | <i>MAP4</i>      |

| Index | Mutated* | Normal* | FC   | P value  | FDR** | Probe set   | Description                                                    | Gene symbol      |
|-------|----------|---------|------|----------|-------|-------------|----------------------------------------------------------------|------------------|
| 3109  | 405      | 330     | 1,23 | 0,021947 | 0,386 | 215096_s_at | Esterase D/formylglutathione hydrolase                         | <i>ESD</i>       |
| 1805  | 23,5     | 19,1    | 1,23 | 0,011624 | 0,351 | 227587_at   | KRI1 homolog ( <i>S. cerevisiae</i> )                          | <i>KRI1</i>      |
| 4398  | 16,5     | 13,4    | 1,23 | 0,032783 | 0,407 | 232890_at   | -                                                              | -                |
| 5741  | 40,4     | 33,0    | 1,23 | 0,046067 | 0,439 | 210210_at   | Myelin protein zero-like 1                                     | <i>MPZL1</i>     |
| 2899  | 83,4     | 68,1    | 1,23 | 0,020348 | 0,383 | 223356_s_at | Mitochondrial translational initiation factor 3                | <i>MTIF3</i>     |
| 2757  | 97,3     | 79,4    | 1,23 | 0,019126 | 0,379 | 208878_s_at | p21 (CDKN1A)-activated kinase 2                                | <i>PAK2</i>      |
| 5088  | 26,6     | 21,7    | 1,23 | 0,039159 | 0,420 | 241460_at   | Ribosomal protein S6 kinase, 90 kDa, polypeptide 3             | <i>RPS6KA2</i>   |
| 2723  | 7,24     | 5,91    | 1,23 | 0,018710 | 0,376 | 232964_at   | Williams Beuren syndrome chromosome region 19                  | <i>WBSCR19</i>   |
| 2469  | 390      | 318     | 1,23 | 0,016588 | 0,367 | 208631_s_at | 3-ketoacyl-Coenzyme A (CoA) thiolase, alpha subunit            | <i>HADHA</i>     |
| 3653  | 695      | 567     | 1,22 | 0,026402 | 0,395 | 208684_at   | Coatomer protein complex, subunit alpha                        | <i>COPA</i>      |
| 4860  | 11,4     | 9,35    | 1,22 | 0,037078 | 0,417 | 236808_at   | FGFR1 oncogene partner 2                                       | <i>FGFR10P2</i>  |
| 4381  | 9,21     | 7,52    | 1,22 | 0,032594 | 0,407 | 217655_at   | FXYD domain containing ion transport regulator 5               | <i>FXYD5</i>     |
| 3567  | 5,39     | 4,40    | 1,22 | 0,025744 | 0,394 | 216563_at   | Ankyrin repeat domain 12                                       | <i>ANKRD12</i>   |
| 830   | 4,40     | 3,59    | 1,22 | 0,004743 | 0,312 | 239788_at   | Suppressor of mec-8 and unc-52 homolog ( <i>C. elegans</i> )   | <i>SMU1</i>      |
| 2313  | 327      | 268     | 1,22 | 0,015366 | 0,363 | 202232_s_at | Eukaryotic translation initiation factor 3, subunit M          | <i>EIF3M</i>     |
| 2309  | 96,1     | 78,5    | 1,22 | 0,015326 | 0,363 | 218153_at   | Cysteinyl-tRNA synthetase 2, mitochondrial (putative)          | <i>CARS2</i>     |
| 4306  | 6,00     | 4,90    | 1,22 | 0,032039 | 0,407 | 1560201_at  | Zinc finger protein 713                                        | <i>ZNF713</i>    |
| 800   | 24,3     | 19,9    | 1,22 | 0,004560 | 0,311 | 1553286_at  | Zinc finger protein 555                                        | <i>ZNF555</i>    |
| 924   | 472      | 386     | 1,22 | 0,005324 | 0,313 | 205480_s_at | UDP-glucose pyrophosphorylase 2                                | <i>UGP2</i>      |
| 3461  | 329      | 269     | 1,22 | 0,024790 | 0,392 | 212377_s_at | Notch homolog 2 ( <i>Drosophila</i> )                          | <i>NOTCH2</i>    |
| 1452  | 538      | 440     | 1,22 | 0,008870 | 0,334 | 201007_at   | Hydroxyacyl-Coenzyme A (CoA) dehydrogenase, beta subunit       | <i>HADHB</i>     |
| 5668  | 54,6     | 44,7    | 1,22 | 0,045235 | 0,436 | 226251_at   | Additional sex combs like 2 ( <i>Drosophila</i> )              | <i>ASXL2</i>     |
| 5314  | 93,1     | 76,2    | 1,22 | 0,041467 | 0,427 | 229650_s_at | Chromosome 19 open reading frame 42                            | <i>C19orf42</i>  |
| 5055  | 144      | 118     | 1,22 | 0,038950 | 0,420 | 225477_s_at | Nuclear receptor subfamily 2, group C, member 2                | <i>NR2C2</i>     |
| 607   | 5,87     | 4,81    | 1,22 | 0,003400 | 0,306 | 1570165_at  | carbohydrate (chondroitin 4) sulfotransferase 11               | <i>CHST11</i>    |
| 5954  | 263      | 216     | 1,22 | 0,048297 | 0,444 | 200764_s_at | Catenin (cadherin-associated protein), alpha 1, 102kDa         | <i>CTNNA1</i>    |
| 3694  | 13,5     | 11,1    | 1,22 | 0,026711 | 0,395 | 237398_at   | Transcribed locus                                              | -                |
| 4578  | 65,8     | 53,9    | 1,22 | 0,034604 | 0,412 | 218588_s_at | Chromosome 5 open reading frame 3                              | <i>C5orf3</i>    |
| 5027  | 22,7     | 18,6    | 1,22 | 0,038646 | 0,420 | 213328_at   | NIMA (never in mitosis gene a)-related kinase 1                | <i>NEK1</i>      |
| 5740  | 62,8     | 51,5    | 1,22 | 0,046057 | 0,439 | 220720_x_at | Family with sequence similarity 128, member B                  | <i>FAM128B</i>   |
| 5634  | 9,47     | 7,76    | 1,22 | 0,044977 | 0,436 | 1552261_at  | WAP four-disulfide core domain 2                               | <i>WFDC2</i>     |
| 4577  | 122      | 100     | 1,22 | 0,034602 | 0,412 | 243916_x_at | Ubiquitin-like domain containing CTD phosphatase 1             | <i>UBLCP1</i>    |
| 4284  | 63,5     | 52,0    | 1,22 | 0,031841 | 0,406 | 235013_at   | Solute carrier family 31 (copper transporters), member 1       | <i>SLC31A1</i>   |
| 5313  | 21,1     | 17,3    | 1,22 | 0,041461 | 0,427 | 242167_at   | Chromosome 10 open reading frame 119                           | <i>C10orf119</i> |
| 3420  | 83,0     | 68,1    | 1,22 | 0,024456 | 0,391 | 203822_s_at | E74-like factor 2 (ets domain transcription factor)            | <i>ELF2</i>      |
| 4231  | 6,49     | 5,33    | 1,22 | 0,031356 | 0,405 | 235761_at   | Tyrosylprotein sulfotransferase 2                              | <i>TPST2</i>     |
| 249   | 7,53     | 6,18    | 1,22 | 0,001142 | 0,251 | 231698_at   | Hypothetical protein LOC647115                                 | <i>FLJ36848</i>  |
| 4547  | 63,3     | 52,0    | 1,22 | 0,034366 | 0,412 | 213302_at   | Phosphoribosylformylglycinamide synthase                       | <i>PFAS</i>      |
| 1328  | 7,41     | 6,08    | 1,22 | 0,007996 | 0,328 | 233817_at   | Neuroblastoma breakpoint family, member 10                     | <i>NBPF10</i>    |
| 4109  | 6,14     | 5,05    | 1,22 | 0,030199 | 0,402 | 232924_at   | Leucine rich repeat containing 17                              | <i>LRRC17</i>    |
| 3833  | 34,5     | 28,3    | 1,22 | 0,028012 | 0,399 | 205665_at   | Tetraspanin 9                                                  | <i>TSPAN9</i>    |
| 5125  | 98,2     | 80,8    | 1,22 | 0,039444 | 0,421 | 203334_at   | DEAH (Asp-Glu-Ala-His) box polypeptide 8                       | <i>DHX8</i>      |
| 3888  | 30,8     | 25,4    | 1,22 | 0,028397 | 0,399 | 242981_at   | Cytochrome P450, family 3, subfamily A, polypeptide 5          | <i>CYP3A5</i>    |
| 2152  | 64,5     | 53,1    | 1,22 | 0,014179 | 0,360 | 228075_x_at | Transcription factor B1, mitochondrial                         | <i>TFB1M</i>     |
| 1442  | 14,1     | 11,6    | 1,22 | 0,008770 | 0,332 | 227575_s_at | Chromosome 14 open reading frame 102                           | <i>C14orf102</i> |
| 5728  | 34,9     | 28,7    | 1,22 | 0,045939 | 0,438 | 37462_i_at  | Splicing factor 3a, subunit 2, 66kDa                           | <i>SF3A2</i>     |
| 2861  | 345      | 284     | 1,22 | 0,020096 | 0,383 | 213531_s_at | RAB3 GTPase activating protein subunit 1 (catalytic)           | <i>RAB3GAP1</i>  |
| 843   | 8,48     | 6,98    | 1,21 | 0,004829 | 0,313 | 233689_at   | Transcription factor 7-like 2 (T-cell specific, HMG-box)       | <i>TCF7L2</i>    |
| 4416  | 314      | 259     | 1,21 | 0,033028 | 0,409 | 218659_at   | Additional sex combs like 2 ( <i>Drosophila</i> )              | <i>ASXL2</i>     |
| 2380  | 62,4     | 51,4    | 1,21 | 0,015858 | 0,364 | 217579_x_at | Atlantin GTPase 2                                              | <i>ATL2</i>      |
| 3759  | 75,9     | 62,6    | 1,21 | 0,027317 | 0,397 | 226958_s_at | Mediator complex subunit 11                                    | <i>MED11</i>     |
| 4896  | 265      | 219     | 1,21 | 0,037418 | 0,418 | 202160_at   | CREB binding protein                                           | <i>CREBBP</i>    |
| 5767  | 42,4     | 35,0    | 1,21 | 0,046339 | 0,439 | 218489_s_at | Aminolevulinate, delta-, dehydratase                           | <i>ALAD</i>      |
| 4822  | 45,9     | 37,8    | 1,21 | 0,036674 | 0,416 | 223330_s_at | SGT1, suppressor of G2 allele of SKP1 ( <i>S. cerevisiae</i> ) | <i>SUGT1</i>     |
| 3721  | 7,26     | 5,98    | 1,21 | 0,027006 | 0,397 | 1552536_at  | Vesicle transport v-SNARE protein Vti1-like 2                  | <i>VTI1A</i>     |
| 2537  | 23,4     | 19,3    | 1,21 | 0,017162 | 0,369 | 216751_at   | cDNA FLJ21226 fis, clone COL00721                              | -                |
| 5966  | 13,7     | 11,3    | 1,21 | 0,048449 | 0,444 | 211002_s_at | Tripartite motif-containing 29                                 | <i>TRIM29</i>    |

| Index | Mutated* | Normal* | FC   | P value  | FDR** | Probe set   | Description                                                     | Gene symbol     |
|-------|----------|---------|------|----------|-------|-------------|-----------------------------------------------------------------|-----------------|
| 5212  | 143      | 118     | 1,21 | 0,040252 | 0,422 | 226339_at   | TruB pseudouridine (psi) synthase homolog 1 (E. coli)           | <i>TRUB1</i>    |
| 4567  | 584      | 481     | 1,21 | 0,034549 | 0,412 | 209009_at   | Esterase D/formylglutathione hydrolase                          | <i>ESD</i>      |
| 4217  | 12,4     | 10,2    | 1,21 | 0,031244 | 0,405 | 1558469_at  | LIM domain containing preferred translocation partner in lipoma | <i>LPP</i>      |
| 3154  | 48,8     | 40,2    | 1,21 | 0,022373 | 0,387 | 205652_s_at | Tubulin tyrosine ligase-like family, member 1                   | <i>TLL1</i>     |
| 2359  | 6,84     | 5,64    | 1,21 | 0,015733 | 0,364 | 227136_s_at | Chromosome 10 open reading frame 46                             | <i>C10orf46</i> |
| 1814  | 6,52     | 5,38    | 1,21 | 0,011689 | 0,351 | 220623_s_at | Testis specific, 10                                             | <i>TSGA10</i>   |
| 4391  | 185      | 153     | 1,21 | 0,032717 | 0,407 | 207196_s_at | TNFAIP3 interacting protein 1                                   | <i>TNIP1</i>    |
| 2450  | 7,66     | 6,32    | 1,21 | 0,016409 | 0,366 | 214319_at   | Furry homolog (Drosophila)                                      | <i>FRY</i>      |
| 5253  | 46,6     | 38,5    | 1,21 | 0,040706 | 0,424 | 227335_at   | Death inducer-obliterator 1                                     | <i>DIDO1</i>    |
| 5641  | 105      | 86,7    | 1,21 | 0,045014 | 0,436 | 209367_at   | Syntaxin binding protein 2                                      | <i>STXBP2</i>   |
| 4775  | 509      | 420     | 1,21 | 0,036211 | 0,414 | 202004_x_at | Succinate dehydrogenase cytochrome b560 subunit, mitochondrial  | <i>SDHC</i>     |
| 3819  | 172      | 142     | 1,21 | 0,027872 | 0,399 | 201573_s_at | Eukaryotic translation termination factor 1                     | <i>ETF1</i>     |
| 3669  | 139      | 115     | 1,21 | 0,026520 | 0,395 | 202930_s_at | Succinate-CoA ligase, ADP-forming, beta subunit                 | <i>SUCLA2</i>   |
| 3549  | 5,01     | 4,14    | 1,21 | 0,025535 | 0,393 | 206862_at   | Zinc finger protein 254                                         | <i>ZNF254</i>   |
| 3268  | 59,9     | 49,5    | 1,21 | 0,023220 | 0,388 | 221822_at   | Coiled-coil domain containing 101                               | <i>CCDC101</i>  |
| 5743  | 113      | 93,3    | 1,21 | 0,046078 | 0,439 | 224768_at   | IWS1 homolog (S. cerevisiae)                                    | <i>IWS1</i>     |
| 4780  | 174      | 143     | 1,21 | 0,036246 | 0,414 | 229322_at   | Protein phosphatase 2, regulatory subunit B', epsilon isoform   | <i>PPP2R5E</i>  |
| 3991  | 12,2     | 10,0    | 1,21 | 0,029187 | 0,400 | 1563512_at  | Nitric oxide synthase 1 (neuronal) adaptor protein              | <i>NOS1AP</i>   |
| 6018  | 6,08     | 5,02    | 1,21 | 0,048981 | 0,445 | 238185_at   | RNA binding motif, single stranded interacting protein 1        | <i>RBMS1</i>    |
| 6040  | 42,9     | 35,5    | 1,21 | 0,049189 | 0,445 | 212786_at   | C-type lectin domain family 16, member A                        | <i>CLEC16A</i>  |
| 5274  | 9,48     | 7,84    | 1,21 | 0,040984 | 0,425 | 1565811_at  | Protein phosphatase 2B regulatory subunit 1                     | <i>PPP3R1</i>   |
| 5706  | 181      | 150     | 1,21 | 0,045693 | 0,438 | 201706_s_at | Peroxisomal biogenesis factor 19                                | <i>PEX19</i>    |
| 5440  | 53,3     | 44,1    | 1,21 | 0,042880 | 0,431 | 223555_at   | Gon-4-like (C. elegans)                                         | <i>GON4L</i>    |
| 3828  | 76,4     | 63,2    | 1,21 | 0,027934 | 0,399 | 217843_s_at | Mediator complex subunit 4                                      | <i>MED4</i>     |
| 5033  | 8,24     | 6,81    | 1,21 | 0,038702 | 0,420 | 234036_x_at | cDNA FLJ21384 fis, clone COL03354                               | -               |
| 2124  | 17,6     | 14,6    | 1,21 | 0,013985 | 0,359 | 235654_at   | Transcribed locus                                               | -               |
| 2963  | 5,74     | 4,75    | 1,21 | 0,020822 | 0,384 | 1553646_at  | Highly divergent homeobox                                       | <i>HDX</i>      |
| 970   | 69,3     | 57,4    | 1,21 | 0,005625 | 0,315 | 204568_at   | KIAA0831 protein                                                | <i>KIAA0831</i> |
| 4527  | 91,7     | 75,9    | 1,21 | 0,034174 | 0,412 | 221006_s_at | sorting nexin family member 27                                  | <i>SNX27</i>    |
| 3749  | 9,58     | 7,94    | 1,21 | 0,027264 | 0,397 | 242171_at   | Platelet derived growth factor C                                | <i>PDGFC</i>    |
| 1787  | 9,78     | 8,10    | 1,21 | 0,011441 | 0,350 | 237026_at   | Sorbin and SH3 domain containing 1                              | <i>SORBS1</i>   |
| 1227  | 122      | 101     | 1,21 | 0,007294 | 0,324 | 226054_at   | Bromodomain containing 4                                        | <i>BRD4</i>     |
| 2510  | 27,4     | 22,7    | 1,21 | 0,016885 | 0,368 | 227215_at   | Golgi associated PDZ and coiled-coil motif containing           | <i>GOPC</i>     |
| 4629  | 7,04     | 5,83    | 1,21 | 0,034913 | 0,412 | 222924_at   | Sarcolemma associated protein                                   | <i>SLMAP</i>    |
| 5539  | 62,3     | 51,6    | 1,21 | 0,044020 | 0,435 | 221256_s_at | Haloacid dehalogenase-like hydrolase domain containing 3        | <i>HDHD3</i>    |
| 3462  | 635      | 527     | 1,21 | 0,024800 | 0,392 | 225312_at   | COMM domain containing 6                                        | <i>COMMD6</i>   |
| 2001  | 164      | 136     | 1,21 | 0,013067 | 0,355 | 224699_s_at | Extended synaptotagmin-like protein 2                           | <i>ESYT2</i>    |
| 5770  | 281      | 233     | 1,21 | 0,046353 | 0,439 | 202026_at   | Succinate dehydrogenase complex subunit D                       | <i>SDHD</i>     |
| 4250  | 132      | 109     | 1,21 | 0,031565 | 0,406 | 202102_s_at | Bromodomain containing 4                                        | <i>BRD4</i>     |
| 6048  | 40,4     | 33,5    | 1,21 | 0,049281 | 0,445 | 227579_at   | -                                                               | -               |
| 4534  | 435      | 361     | 1,21 | 0,034252 | 0,412 | 223006_s_at | Chromosome 9 open reading frame 5                               | <i>C9orf5</i>   |
| 4655  | 229      | 190     | 1,21 | 0,035159 | 0,413 | 225229_at   | AF4/FMR2 family, member 4                                       | <i>AFF4</i>     |
| 3969  | 68,8     | 57,1    | 1,21 | 0,029000 | 0,399 | 203328_x_at | Insulin-degrading enzyme                                        | <i>IDE</i>      |
| 2877  | 150      | 124     | 1,20 | 0,020196 | 0,383 | 226468_at   | Zinc finger protein 364                                         | <i>ZNF364</i>   |
| 3858  | 6,30     | 5,23    | 1,20 | 0,028173 | 0,399 | 205560_at   | Proprotein convertase subtilisin/kexin type 5                   | <i>PCSK5</i>    |
| 3738  | 115      | 95,1    | 1,20 | 0,027140 | 0,397 | 218102_at   | 2-deoxyribose-5-phosphate aldolase homolog (C. elegans)         | <i>DERA</i>     |
| 1633  | 11,2     | 9,31    | 1,20 | 0,010290 | 0,344 | 231366_at   | MGC44478                                                        | <i>FDPSL2A</i>  |
| 5569  | 234      | 194     | 1,20 | 0,044333 | 0,435 | 225519_at   | Protein phosphatase 4, regulatory subunit 2                     | <i>PPP4R2</i>   |
| 3945  | 4,14     | 3,44    | 1,20 | 0,028807 | 0,399 | 220666_at   | -                                                               | -               |
| 4846  | 9,82     | 8,16    | 1,20 | 0,036920 | 0,417 | 220273_at   | Interleukin 17B                                                 | <i>IL17B</i>    |
| 3600  | 10,2     | 8,51    | 1,20 | 0,025962 | 0,394 | 231167_at   | Solute carrier family 44, member 1                              | <i>SLC44A1</i>  |
| 1900  | 77,6     | 64,4    | 1,20 | 0,012354 | 0,355 | 204812_at   | ZW10, kinetochore associated, homolog (Drosophila)              | <i>ZW10</i>     |
| 3955  | 155      | 129     | 1,20 | 0,028895 | 0,399 | 225417_at   | Enhancer of polycomb homolog 1 (Drosophila)                     | <i>EPC1</i>     |
| 4074  | 6,33     | 5,26    | 1,20 | 0,029882 | 0,401 | 232427_at   | Zinc finger protein 224                                         | <i>ZNF224</i>   |
| 2807  | 9,30     | 7,73    | 1,20 | 0,019529 | 0,380 | 231369_at   | Zinc finger protein 333                                         | <i>ZNF333</i>   |
| 5838  | 63,8     | 53,1    | 1,20 | 0,047180 | 0,442 | 206782_s_at | DnaJ (Hsp40) homolog, subfamily C, member 4                     | <i>DNAJC4</i>   |
| 2155  | 5,24     | 4,36    | 1,20 | 0,014200 | 0,360 | 237248_at   | Phosphodiesterase 11A                                           | <i>PDE11A</i>   |

| Index | Mutated* | Normal* | FC   | P value  | FDR** | Probe set   | Description                                                        | Gene symbol         |
|-------|----------|---------|------|----------|-------|-------------|--------------------------------------------------------------------|---------------------|
| 16    | 3,66     | 3,04    | 1,20 | 0,000056 | 0,191 | 239129_at   | Transforming growth factor, beta receptor 1                        | <i>TGFBRI</i>       |
| 5011  | 5,59     | 4,65    | 1,20 | 0,038515 | 0,420 | 1557113_at  | Hypothetical protein LOC283588                                     | <i>LOC283588</i>    |
| 575   | 12,7     | 10,6    | 1,20 | 0,003159 | 0,300 | 236199_at   | Arachidonate 5-lipoxygenase                                        | <i>ALOX5</i>        |
| 3011  | 21,6     | 18,0    | 1,20 | 0,021185 | 0,385 | 214757_at   | Postmeiotic segregation increased 2-like 2 pseudogene              | <i>PMS2L2</i>       |
| 2520  | 67,0     | 55,8    | 1,20 | 0,017004 | 0,369 | 213349_at   | Transmembrane and coiled-coil domain family 1                      | <i>TMCC1</i>        |
| 4872  | 90,3     | 75,2    | 1,20 | 0,037190 | 0,417 | 212080_at   | Myeloid/lymphoid or mixed-lineage leukemia                         | <i>MLL</i>          |
| 1899  | 126      | 105     | 1,20 | 0,012352 | 0,355 | 219526_at   | Chromosome 14 open reading frame 169                               | <i>C14orf169</i>    |
| 4927  | 14,5     | 12,1    | 1,20 | 0,037792 | 0,419 | 216685_s_at | Methylthioadenosine phosphorylase                                  | <i>MTAP</i>         |
| 2593  | 5,01     | 4,18    | 1,20 | 0,017627 | 0,371 | 237376_at   | Cullin 3                                                           | <i>CUL3</i>         |
| 4945  | 24,8     | 20,7    | 1,20 | 0,037937 | 0,419 | 201333_s_at | Rho guanine nucleotide exchange factor (GEF) 12                    | <i>ARHGEF12</i>     |
| 4764  | 57,7     | 48,1    | 1,20 | 0,036108 | 0,414 | 227541_at   | WD repeat domain 20                                                | <i>WDR20</i>        |
| 2199  | 181      | 151     | 1,20 | 0,014533 | 0,361 | 223081_at   | PHD finger protein 23                                              | <i>PHF23</i>        |
| 1769  | 9,42     | 7,86    | 1,20 | 0,011275 | 0,348 | 240176_at   | Hypothetical protein LOC541471                                     | <i>LOC541471</i>    |
| 913   | 7,10     | 5,93    | 1,20 | 0,005256 | 0,313 | 232930_at   | Dedicator of cytokinesis 1                                         | <i>DOCK1</i>        |
| 5848  | 5,98     | 4,99    | 1,20 | 0,047290 | 0,442 | 243352_at   | Alpha-kinase 1                                                     | <i>ALPK1</i>        |
| 3213  | 13,6     | 11,3    | 1,20 | 0,022767 | 0,387 | 232940_s_at | Myeloid/lymphoid or mixed-lineage leukemia 3                       | <i>MLL3</i>         |
| 5227  | 24,0     | 20,0    | 1,20 | 0,040437 | 0,423 | 1559249_at  | Ataxin 1                                                           | <i>ATXN1</i>        |
| 3577  | 16,9     | 14,1    | 1,20 | 0,025825 | 0,394 | 243201_at   | Heterogeneous nuclear ribonucleoprotein H2                         | <i>HNRPH2</i>       |
| 262   | 5,23     | 4,37    | 1,20 | 0,001237 | 0,258 | 227939_s_at | Transformer-2 alpha                                                | <i>TRA2A</i>        |
| 5262  | 5,05     | 4,22    | 1,20 | 0,040873 | 0,425 | 232303_at   | Zinc finger protein 608                                            | <i>ZNF608</i>       |
| 3807  | 23,0     | 19,2    | 1,20 | 0,027721 | 0,398 | 219075_at   | Yip1 domain family, member 2                                       | <i>YIPF2</i>        |
| 4592  | 4,61     | 3,86    | 1,20 | 0,034744 | 0,412 | 238811_at   | ATPase, Class VI, type 11B                                         | <i>ATP11B</i>       |
| 4664  | 9,19     | 7,69    | 1,20 | 0,035223 | 0,413 | 1554867_a_a | Proline rich 16                                                    | <i>PRR16</i>        |
| 3836  | 9,18     | 7,68    | 1,20 | 0,028032 | 0,399 | 238865_at   | Similar to poly(A) binding protein, cytoplasmic 4 (inducible form) | <i>LOC132430</i>    |
| 5007  | 4,69     | 3,92    | 1,20 | 0,038469 | 0,420 | 219936_s_at | G protein-coupled receptor 87                                      | <i>GPR87</i>        |
| 4652  | 60,4     | 50,5    | 1,19 | 0,035132 | 0,413 | 202584_at   | Nuclear transcription factor, X-box binding 1                      | <i>NFX1</i>         |
| 2858  | 39,5     | 33,1    | 1,19 | 0,020070 | 0,383 | 228917_at   | Zinc finger protein 510                                            | <i>ZNF510</i>       |
| 2209  | 10,5     | 8,83    | 1,19 | 0,014633 | 0,362 | 237418_at   | CDK5 regulatory subunit associated protein 2                       | <i>CDK5RAP2</i>     |
| 6123  | 10,7     | 8,98    | 1,19 | 0,049992 | 0,446 | 205894_at   | Arylsulfatase E (chondrodysplasia punctata 1)                      | <i>ARSE</i>         |
| 5618  | 190      | 159     | 1,19 | 0,044833 | 0,436 | 201877_s_at | Protein phosphatase 2, regulatory subunit B', gamma isoform        | <i>PPP2R5C</i>      |
| 5999  | 338      | 283     | 1,19 | 0,048771 | 0,444 | 201528_at   | Replication protein A1, 70kDa                                      | <i>RPA1</i>         |
| 2816  | 16,9     | 14,2    | 1,19 | 0,019638 | 0,381 | 212650_at   | EH domain binding protein 1                                        | <i>EHBP1</i>        |
| 3151  | 13,9     | 11,7    | 1,19 | 0,022368 | 0,387 | 237252_at   | Thrombomodulin                                                     | <i>THBD</i>         |
| 3615  | 207      | 173     | 1,19 | 0,026088 | 0,395 | 221502_at   | Karyopherin alpha 3 (importin alpha 4)                             | <i>KPNA3</i>        |
| 5039  | 17,3     | 14,5    | 1,19 | 0,038830 | 0,420 | 238827_at   | SH3 domain containing ring finger 2                                | <i>SH3RF2</i>       |
| 5477  | 5,79     | 4,85    | 1,19 | 0,043305 | 0,432 | 214967_at   | cDNA FLJ12055 fis, clone HEMBB1002049                              | -                   |
| 4325  | 7,41     | 6,21    | 1,19 | 0,032186 | 0,407 | 238614_x_at | Zinc finger protein 430                                            | <i>ZNF430</i>       |
| 5292  | 8,31     | 6,97    | 1,19 | 0,041199 | 0,426 | 1553216_at  | Zinc finger protein 41                                             | <i>ZNF41</i>        |
| 4361  | 7,35     | 6,16    | 1,19 | 0,032432 | 0,407 | 1557797_a_a | Zinc finger E-box binding homeobox 2                               | <i>ZEB2</i>         |
| 4307  | 46,5     | 39,0    | 1,19 | 0,032045 | 0,407 | 214783_s_at | Annexin A11                                                        | <i>ANXA11</i>       |
| 2742  | 64,4     | 54,0    | 1,19 | 0,018920 | 0,377 | 204928_s_at | Solute carrier family 10, member 3                                 | <i>SLC10A3</i>      |
| 2702  | 5,18     | 4,35    | 1,19 | 0,018540 | 0,375 | 1566825_at  | Rho GTPase activating protein 24                                   | <i>ARHGAP24</i>     |
| 4424  | 62,2     | 52,2    | 1,19 | 0,033118 | 0,409 | 225234_at   | Cas-Br-M (murine) ecotropic retroviral transforming sequence       | <i>CBL</i>          |
| 4108  | 504      | 423     | 1,19 | 0,030195 | 0,402 | 206200_s_at | Annexin A11                                                        | <i>ANXA11</i>       |
| 3883  | 52,9     | 44,4    | 1,19 | 0,028348 | 0,399 | 237868_x_at | FK506 binding protein 15, 133kDa                                   | <i>FKBP15</i>       |
| 5964  | 65,7     | 55,2    | 1,19 | 0,048437 | 0,444 | 233775_x_at | cDNA FLJ13242 fis, clone OVARC1000578                              | -                   |
| 5388  | 8,98     | 7,55    | 1,19 | 0,042252 | 0,429 | 236241_at   | Mediator complex subunit 31                                        | <i>MED31</i>        |
| 2606  | 162      | 137     | 1,19 | 0,017699 | 0,371 | 235142_at   | Zinc finger and BTB domain containing 8                            | <i>ZBTB8</i>        |
| 3241  | 497      | 418     | 1,19 | 0,022991 | 0,388 | 224936_at   | Eukaryotic translation initiation factor 2, subunit 3 gamma        | <i>EIF2S3</i>       |
| 4003  | 41,2     | 34,7    | 1,19 | 0,029304 | 0,400 | 238510_at   | Zinc finger protein 720                                            | <i>ZNF720</i>       |
| 5831  | 90,2     | 75,9    | 1,19 | 0,047123 | 0,442 | 214902_x_at | Hypothetical protein FLJ42393                                      | <i>FLJ42393</i>     |
| 1533  | 31,0     | 26,1    | 1,19 | 0,009503 | 0,337 | 212078_s_at | Myeloid/lymphoid or mixed-lineage leukemia                         | <i>MLL</i>          |
| 1058  | 4,61     | 3,88    | 1,19 | 0,006206 | 0,319 | 232332_at   | KIAA1210 protein                                                   | <i>RP13-347D8.3</i> |
| 3424  | 46,6     | 39,2    | 1,19 | 0,024470 | 0,391 | 244406_at   | Zinc finger protein 20                                             | <i>ZNF20</i>        |
| 4088  | 5,15     | 4,33    | 1,19 | 0,030065 | 0,402 | 241242_at   | Family with sequence similarity 120A                               | <i>FAM120A</i>      |
| 4019  | 13,1     | 11,1    | 1,19 | 0,029426 | 0,400 | 239023_at   | CDC42 small effector 1                                             | <i>CDC42SE1</i>     |
| 4919  | 49,2     | 41,4    | 1,19 | 0,037662 | 0,419 | 236027_at   | Chromosome 10 open reading frame 78                                | <i>C10orf78</i>     |

| Index | Mutated* | Normal* | FC   | P value  | FDR** | Probe set   | Description                                                 | Gene symbol |
|-------|----------|---------|------|----------|-------|-------------|-------------------------------------------------------------|-------------|
| 3508  | 82,8     | 69,8    | 1,19 | 0,025201 | 0,392 | 205745_x_at | ADAM metallopeptidase domain 17                             | ADAM17      |
| 2718  | 5,75     | 4,85    | 1,19 | 0,018671 | 0,376 | 244655_at   | Hypothetical protein LOC644192                              | LOC644192   |
| 3998  | 24,2     | 20,4    | 1,19 | 0,029266 | 0,400 | 203348_s_at | Ets variant gene 5 (ets-related molecule)                   | ETV5        |
| 2111  | 525      | 443     | 1,19 | 0,013848 | 0,358 | 202231_at   | Eukaryotic translation initiation factor 3, subunit M       | EIF3M       |
| 2787  | 120      | 102     | 1,19 | 0,019363 | 0,380 | 218147_s_at | Glycosyltransferase 8 domain containing 1                   | GLT8D1      |
| 5540  | 1104     | 931     | 1,19 | 0,044029 | 0,435 | 200761_s_at | ADP-ribosylation-like factor 6 interacting protein 5        | ARL6IP5     |
| 4894  | 7,25     | 6,11    | 1,19 | 0,037400 | 0,418 | 1569538_at  | Clone FLB8310 PRO2225                                       | -           |
| 5975  | 20,2     | 17,1    | 1,19 | 0,048531 | 0,444 | 242297_at   | RAS responsive element binding protein 1                    | RREB1       |
| 4141  | 9,44     | 7,97    | 1,18 | 0,030562 | 0,403 | 1558306_at  | Thyroid adenoma associated                                  | THADA       |
| 2138  | 44,7     | 37,7    | 1,18 | 0,014054 | 0,359 | 218466_at   | TBC1 domain family, member 17                               | TBC1D17     |
| 5364  | 11,7     | 9,87    | 1,18 | 0,042082 | 0,429 | 232588_at   | Stromal antigen 1                                           | STAG1       |
| 4458  | 9,99     | 8,43    | 1,18 | 0,033495 | 0,411 | 227913_at   | Exosome component 3                                         | EXOSC3      |
| 3687  | 791      | 668     | 1,18 | 0,026627 | 0,395 | 211938_at   | Eukaryotic translation initiation factor 4B                 | EIF4B       |
| 2490  | 10,8     | 9,10    | 1,18 | 0,016784 | 0,367 | 214605_x_at | G protein-coupled receptor 1                                | GPR1        |
| 988   | 8,17     | 6,90    | 1,18 | 0,005696 | 0,315 | 230790_x_at | Forkhead box N3                                             | FOXN3       |
| 560   | 4,96     | 4,19    | 1,18 | 0,003054 | 0,298 | 234605_at   | CDC14 cell division cycle 14 homolog B (S. cerevisiae)      | CDC14B      |
| 5951  | 655      | 553     | 1,18 | 0,048273 | 0,444 | 226801_s_at | Axin interactor, dorsalization associated                   | AIDA        |
| 4161  | 10,7     | 9,04    | 1,18 | 0,030766 | 0,404 | 232428_at   | Monoacylglycerol O-acyltransferase 2                        | MOGAT2      |
| 4085  | 10,6     | 8,97    | 1,18 | 0,030000 | 0,402 | 238027_at   | Hypothetical protein LOC202051                              | LOC202051   |
| 5421  | 633      | 535     | 1,18 | 0,042622 | 0,430 | 208942_s_at | Translocation protein 1                                     | TLOC1       |
| 2463  | 94,4     | 79,8    | 1,18 | 0,016526 | 0,367 | 204765_at   | Rho guanine nucleotide exchange factor (GEF) 5              | ARHGEF5     |
| 1503  | 459      | 388     | 1,18 | 0,009241 | 0,336 | 217874_at   | succinate-CoA ligase, GDP-forming, alpha subunit            | SUCLG1      |
| 4124  | 296      | 250     | 1,18 | 0,030332 | 0,402 | 224777_s_at | PAF acetylhydrolase 30 kDa subunit                          | PAFAH1B2    |
| 1172  | 6,82     | 5,77    | 1,18 | 0,006886 | 0,321 | 1557158_s_a | Myeloid/lymphoid or mixed-lineage leukemia 3                | MLL3        |
| 1545  | 5,52     | 4,68    | 1,18 | 0,009545 | 0,337 | 1558754_at  | Zinc finger protein 763                                     | ZNF763      |
| 1855  | 9,53     | 8,07    | 1,18 | 0,011950 | 0,352 | 232465_at   | Transcription factor 7-like 2 (T-cell specific, HMG-box)    | TCF7L2      |
| 3122  | 5,95     | 5,04    | 1,18 | 0,022089 | 0,387 | 1567044_s_a | LSM14A, SCD6 homolog A (S. cerevisiae)                      | LSM14A      |
| 3357  | 9,84     | 8,34    | 1,18 | 0,023837 | 0,388 | 229274_at   | GNAS complex locus                                          | GNAS        |
| 6039  | 75,5     | 64,0    | 1,18 | 0,049159 | 0,445 | 225565_at   | cAMP responsive element binding protein 1                   | CREB1       |
| 3531  | 5,44     | 4,61    | 1,18 | 0,025382 | 0,393 | 1565638_at  | Peripheral myelin protein 22                                | PMP22       |
| 2698  | 11,4     | 9,64    | 1,18 | 0,018502 | 0,375 | 214000_s_at | Regulator of G-protein signalling 10                        | RGS10       |
| 1486  | 4,29     | 3,64    | 1,18 | 0,009150 | 0,336 | 220328_at   | Polyhomeotic homolog 3 (Drosophila)                         | PHC3        |
| 1301  | 3738     | 3169    | 1,18 | 0,007743 | 0,325 | 211940_x_at | H3 histone, family 3A                                       | H3F3A       |
| 5534  | 171      | 145     | 1,18 | 0,043938 | 0,434 | 204028_s_at | RAB GTPase activating protein 1                             | RABGAP1     |
| 664   | 286      | 243     | 1,18 | 0,003828 | 0,308 | 226052_at   | Bromodomain containing 4                                    | BRD4        |
| 6102  | 17,4     | 14,8    | 1,18 | 0,049810 | 0,446 | 226890_at   | WD repeat domain 35                                         | WDR35       |
| 2426  | 7,69     | 6,53    | 1,18 | 0,016220 | 0,365 | 1562059_at  | Transmembrane 9 superfamily member 3                        | TM9SF3      |
| 5646  | 31,3     | 26,6    | 1,18 | 0,045055 | 0,436 | 213896_x_at | Family with sequence similarity 149, member B1              | FAM149B1    |
| 5779  | 153      | 130     | 1,18 | 0,046525 | 0,440 | 202537_s_at | Chromatin modifying protein 2B                              | CHMP2B      |
| 1785  | 10,5     | 8,93    | 1,18 | 0,011402 | 0,349 | 203969_at   | Peroxisomal biogenesis factor 3                             | PEX3        |
| 5151  | 30,0     | 25,4    | 1,18 | 0,039647 | 0,421 | 215718_s_at | PHD finger protein 3                                        | PHF3        |
| 2377  | 6,55     | 5,56    | 1,18 | 0,015844 | 0,364 | 230258_at   | GLIS family zinc finger 3                                   | GLIS3       |
| 4691  | 204      | 173     | 1,18 | 0,035438 | 0,413 | 201434_at   | Tetratricopeptide repeat domain 1                           | TTC1        |
| 2622  | 8,58     | 7,29    | 1,18 | 0,017816 | 0,371 | 235283_at   | Integrator complex subunit 6                                | INTS6       |
| 4087  | 11,8     | 10,1    | 1,18 | 0,030029 | 0,402 | 232621_at   | Ubiquitin specific peptidase 48                             | USP48       |
| 4970  | 96,7     | 82,2    | 1,18 | 0,038124 | 0,419 | 206551_x_at | Kelch-like 24 (Drosophila)                                  | KLHL24      |
| 3119  | 12,9     | 11,0    | 1,18 | 0,022053 | 0,387 | 244698_at   | CMT1A duplicated region transcript 4                        | CDRT4       |
| 1894  | 5,37     | 4,57    | 1,18 | 0,012314 | 0,355 | 214829_at   | Aminoacidpate-semialdehyde synthase                         | AASS        |
| 331   | 4,70     | 4,00    | 1,18 | 0,001647 | 0,272 | 242258_at   | Zinc finger and BTB domain containing 1                     | ZBTB1       |
| 3676  | 27,6     | 23,5    | 1,18 | 0,026571 | 0,395 | 1557690_x_a | Neuronal PAS domain protein 2                               | NPAS2       |
| 5293  | 6,26     | 5,32    | 1,18 | 0,041222 | 0,426 | 242006_at   | Leber congenital amaurosis 5                                | LCA5        |
| 5916  | 4,12     | 3,51    | 1,18 | 0,047949 | 0,443 | 206543_at   | ATP-dependent helicase SMARCA2                              | SMARCA2     |
| 1756  | 5,67     | 4,83    | 1,18 | 0,011197 | 0,348 | 1562815_at  | EF-hand calcium binding domain 6                            | EFCAB6      |
| 2440  | 5,29     | 4,50    | 1,17 | 0,016309 | 0,365 | 210697_at   | Zinc finger protein 257                                     | ZNF257      |
| 4902  | 76,0     | 64,7    | 1,17 | 0,037505 | 0,418 | 214316_x_at | Calreticulin                                                | CALR        |
| 4075  | 3,44     | 2,93    | 1,17 | 0,029884 | 0,401 | 240292_x_at | Ankyrin repeat and sterile alpha motif domain containing 1B | ANKS1B      |
| 2607  | 5,75     | 4,89    | 1,17 | 0,017706 | 0,371 | 244691_at   | SET domain containing 5                                     | SETD5       |

| Index | Mutated* | Normal* | FC   | P value  | FDR** | Probe set   | Description                                                       | Gene symbol      |
|-------|----------|---------|------|----------|-------|-------------|-------------------------------------------------------------------|------------------|
| 4213  | 920      | 784     | 1,17 | 0,031202 | 0,405 | 217768_at   | Chromosome 14 open reading frame 166                              | <i>C14orf166</i> |
| 4021  | 6,36     | 5,42    | 1,17 | 0,029430 | 0,400 | 233253_at   | cDNA FLJ14147 fis, clone MAMMA1002973                             | -                |
| 977   | 57,5     | 49,0    | 1,17 | 0,005671 | 0,315 | 235828_at   | PRELI domain containing 2                                         | <i>PRELID2</i>   |
| 3426  | 5,12     | 4,36    | 1,17 | 0,024496 | 0,391 | 243361_at   | Splicing factor, arginine/serine-rich 12                          | <i>SFRS12</i>    |
| 2744  | 18,6     | 15,8    | 1,17 | 0,018935 | 0,377 | 219172_at   | Ubiquitin domain containing 1                                     | <i>UBTD1</i>     |
| 2930  | 19,8     | 16,8    | 1,17 | 0,020548 | 0,383 | 219380_x_at | Polymerase (DNA directed), eta                                    | <i>POLH</i>      |
| 4920  | 257      | 219     | 1,17 | 0,037673 | 0,419 | 219598_s_at | RWD domain containing 1                                           | <i>RWDD1</i>     |
| 2528  | 10,9     | 9,30    | 1,17 | 0,017077 | 0,369 | 214980_at   | Ubiquitin protein ligase E3A                                      | <i>UBE3A</i>     |
| 1963  | 4,35     | 3,71    | 1,17 | 0,012834 | 0,355 | 1558560_s_a | Basic leucine zipper nuclear factor 1 (JEM-1)                     | <i>BLZF1</i>     |
| 4040  | 19,6     | 16,7    | 1,17 | 0,029597 | 0,401 | 203945_at   | Arginase, type II                                                 | <i>ARG2</i>      |
| 3747  | 5,82     | 4,96    | 1,17 | 0,027245 | 0,397 | 242456_at   | MRE11 meiotic recombination 11 homolog A ( <i>S. cerevisiae</i> ) | <i>MRE11A</i>    |
| 5924  | 6,41     | 5,47    | 1,17 | 0,047997 | 0,443 | 239889_at   | Chromosome 13 open reading frame 21                               | <i>C13orf21</i>  |
| 5488  | 84,2     | 71,8    | 1,17 | 0,043438 | 0,433 | 207268_x_at | Abl interactor 2                                                  | <i>ABI2</i>      |
| 5943  | 98,4     | 83,9    | 1,17 | 0,048165 | 0,443 | 1558511_s_a | Extended synaptotagmin-like protein 2                             | <i>ESYT2</i>     |
| 592   | 1152     | 984     | 1,17 | 0,003269 | 0,301 | 200677_at   | Pituitary tumor-transforming 1 interacting protein                | <i>PTTG1IP</i>   |
| 5042  | 35,6     | 30,4    | 1,17 | 0,038856 | 0,420 | 219247_s_at | Zinc finger, DHHC-type containing 14                              | <i>ZDHHC14</i>   |
| 1837  | 5,16     | 4,41    | 1,17 | 0,011815 | 0,351 | 1567457_at  | RAS-related C3 botulinum toxin substrate 1                        | <i>RAC1</i>      |
| 5102  | 5,67     | 4,84    | 1,17 | 0,039232 | 0,420 | 208268_at   | ADAM metallopeptidase domain 28                                   | <i>ADAM28</i>    |
| 1502  | 49,6     | 42,4    | 1,17 | 0,009238 | 0,336 | 222195_s_at | Chromosome 9 open reading frame 156                               | <i>C9orf156</i>  |
| 5050  | 10,6     | 9,08    | 1,17 | 0,038907 | 0,420 | 214008_at   | Twinfilin, actin-binding protein, homolog 1 ( <i>Drosophila</i> ) | <i>TWF1</i>      |
| 5357  | 132      | 113     | 1,17 | 0,042012 | 0,429 | 203057_s_at | PR domain containing 2, with ZNF domain                           | <i>PRDM2</i>     |
| 3043  | 28,3     | 24,2    | 1,17 | 0,021428 | 0,385 | 214028_x_at | Tudor domain containing 3                                         | <i>TDRD3</i>     |
| 406   | 7,45     | 6,38    | 1,17 | 0,002133 | 0,286 | 214031_s_at | Keratin 7                                                         | <i>KRT7</i>      |
| 588   | 190      | 163     | 1,17 | 0,003249 | 0,301 | 1555945_s_a | Family with sequence similarity 120A                              | <i>FAM120A</i>   |
| 1701  | 51,4     | 44,0    | 1,17 | 0,010831 | 0,348 | 222492_at   | Pyridoxal (pyridoxine, vitamin B6) kinase                         | <i>PDXX</i>      |
| 875   | 4,17     | 3,57    | 1,17 | 0,005050 | 0,313 | 236409_at   | Lysophospholipase-like 1                                          | <i>LYPLAL1</i>   |
| 5931  | 25,5     | 21,9    | 1,17 | 0,048084 | 0,443 | 209920_at   | Bone morphogenetic protein receptor, type II                      | <i>BMPR2</i>     |
| 5947  | 211      | 181     | 1,17 | 0,048195 | 0,443 | 212399_s_at | Vestigial like 4 ( <i>Drosophila</i> )                            | <i>VGLL4</i>     |
| 3277  | 523      | 448     | 1,17 | 0,023346 | 0,388 | 201807_at   | Vacuolar protein sorting 26 homolog A ( <i>S. pombe</i> )         | <i>VPS26A</i>    |
| 455   | 4,29     | 3,68    | 1,17 | 0,002434 | 0,288 | 240485_at   | Tetratricopeptide repeat domain 8                                 | <i>TTC8</i>      |
| 4996  | 261      | 224     | 1,16 | 0,038359 | 0,420 | 202985_s_at | BCL2-associated athanogene 5                                      | <i>BAG5</i>      |
| 4030  | 18,6     | 15,9    | 1,16 | 0,029511 | 0,400 | 231548_at   | Forkhead box O3                                                   | <i>FOXO3</i>     |
| 5675  | 5,36     | 4,61    | 1,16 | 0,045287 | 0,436 | 205092_x_at | Zinc finger and BTB domain containing 1                           | <i>ZBTB1</i>     |
| 4167  | 46,6     | 40,0    | 1,16 | 0,030793 | 0,404 | 222649_at   | Exportin 4                                                        | <i>XPO4</i>      |
| 4816  | 33,8     | 29,0    | 1,16 | 0,036601 | 0,416 | 220938_s_at | Glucocorticoid modulatory element binding protein 1               | <i>GMEB1</i>     |
| 2424  | 2177     | 1871    | 1,16 | 0,016211 | 0,365 | 214938_x_at | High-mobility group box 1                                         | <i>HMGB1</i>     |
| 1281  | 4,74     | 4,07    | 1,16 | 0,007629 | 0,325 | 1562775_at  | Nudix (nucleoside diphosphate linked moiety X)-type motif 12      | <i>NUDT12</i>    |
| 3798  | 5,25     | 4,51    | 1,16 | 0,027669 | 0,398 | 1557553_at  | Protein phosphatase 1, regulatory (inhibitor) subunit 12B         | <i>PPP1R12B</i>  |
| 4344  | 5,23     | 4,49    | 1,16 | 0,032339 | 0,407 | 239461_at   | Polypeptide N-acetylgalactosaminyltransferase-like protein 2      | <i>GALNTL2</i>   |
| 3188  | 27,0     | 23,3    | 1,16 | 0,022597 | 0,387 | 209126_x_at | Keratin 6B                                                        | <i>KRT6B</i>     |
| 4273  | 11,7     | 10,0    | 1,16 | 0,031762 | 0,406 | 228132_at   | Actin binding LIM protein family, member 2                        | <i>ABLIM2</i>    |
| 3148  | 4,94     | 4,25    | 1,16 | 0,022347 | 0,387 | 202035_s_at | Secreted frizzled-related protein 1                               | <i>SFRP1</i>     |
| 1777  | 16,2     | 14,0    | 1,16 | 0,011306 | 0,348 | 213863_s_at | Ornithine decarboxylase antizyme 3                                | <i>OAZ3</i>      |
| 587   | 6,19     | 5,33    | 1,16 | 0,003244 | 0,301 | 1565628_at  | Leucine-rich repeat kinase 1                                      | <i>LRRK1</i>     |
| 2868  | 52,4     | 45,1    | 1,16 | 0,020138 | 0,383 | 221192_x_at | Major facilitator superfamily domain containing 11                | <i>MFSD11</i>    |
| 3079  | 7,67     | 6,60    | 1,16 | 0,021704 | 0,385 | 230392_at   | cDNA FLJ31096 fis, clone IMR321000207                             | -                |
| 5933  | 122      | 105     | 1,16 | 0,048100 | 0,443 | 221564_at   | Protein arginine methyltransferase 2                              | <i>PRMT2</i>     |
| 5695  | 7,34     | 6,33    | 1,16 | 0,045566 | 0,437 | 209800_at   | Keratin 16                                                        | <i>KRT16</i>     |
| 1685  | 53,7     | 46,2    | 1,16 | 0,010651 | 0,345 | 47530_at    | Chromosome 9 open reading frame 156                               | <i>C9orf156</i>  |
| 3477  | 7,37     | 6,35    | 1,16 | 0,024971 | 0,392 | 1563947_a_a | ELKS/RAB6-interacting/CAST family member 1                        | <i>ERC1</i>      |
| 4866  | 30,7     | 26,4    | 1,16 | 0,037112 | 0,417 | 232867_at   | Serine palmitoyltransferase, long chain base subunit 2            | <i>SPTLC2</i>    |
| 3866  | 190      | 164     | 1,16 | 0,028243 | 0,399 | 212245_at   | Multiple coagulation factor deficiency 2                          | <i>MCFD2</i>     |
| 2415  | 15,6     | 13,5    | 1,16 | 0,016131 | 0,365 | 205203_at   | Phospholipase D1, phosphatidylcholine-specific                    | <i>PLD1</i>      |
| 5422  | 1707     | 1473    | 1,16 | 0,042629 | 0,430 | 200680_x_at | High-mobility group box 1                                         | <i>HMGB1</i>     |
| 2393  | 8,96     | 7,72    | 1,16 | 0,015975 | 0,365 | 241701_at   | Rho GTPase activating protein 21                                  | <i>ARHGAP21</i>  |
| 3169  | 36,3     | 31,3    | 1,16 | 0,022488 | 0,387 | 214253_s_at | Dystrobrevin, beta                                                | <i>DTNB</i>      |
| 3719  | 6,79     | 5,87    | 1,16 | 0,026999 | 0,397 | 237173_at   | Similar to phosphodiesterase 4D interacting protein isoform 1     | <i>LOC647500</i> |

| Index | Mutated* | Normal* | FC   | P value  | FDR** | Probe set   | Description                                                        | Gene symbol         |
|-------|----------|---------|------|----------|-------|-------------|--------------------------------------------------------------------|---------------------|
| 4279  | 3,90     | 3,37    | 1,16 | 0,031801 | 0,406 | 232980_at   | LMBR1 domain containing 1                                          | <i>LMBRD1</i>       |
| 1644  | 9,14     | 7,89    | 1,16 | 0,010357 | 0,344 | 239769_at   | Cadherin 11, type 2, OB-cadherin (osteoblast)                      | <i>CDH11</i>        |
| 5531  | 31,1     | 26,9    | 1,16 | 0,043887 | 0,434 | 227823_at   | Retrotransposon gag domain containing 4                            | <i>RGAG4</i>        |
| 3475  | 6,13     | 5,30    | 1,16 | 0,024960 | 0,392 | 1565887_at  | Transient receptor potential cation channel, subfamily M, member 7 | <i>TRPM7</i>        |
| 5425  | 21,0     | 18,1    | 1,16 | 0,042688 | 0,430 | 243656_at   | Hypothetical protein LOC642852                                     | <i>LOC642852</i>    |
| 4555  | 6,00     | 5,18    | 1,16 | 0,034440 | 0,412 | 231061_at   | La ribonucleoprotein domain family, member 7                       | <i>LARP7</i>        |
| 2134  | 5,38     | 4,65    | 1,16 | 0,014029 | 0,359 | 221697_at   | Microtubule-associated protein 1 light chain 3 gamma               | <i>MAP1LC3C</i>     |
| 1520  | 12,8     | 11,0    | 1,16 | 0,009394 | 0,337 | 1555752_at  | Saitohin                                                           | <i>STH</i>          |
| 5650  | 1931     | 1671    | 1,16 | 0,045067 | 0,436 | 208646_at   | Ribosomal protein S14                                              | <i>RPS14</i>        |
| 2178  | 8,96     | 7,75    | 1,16 | 0,014409 | 0,361 | 241627_x_at | Hypothetical protein FLJ10357                                      | <i>FLJ10357</i>     |
| 1521  | 59,8     | 51,7    | 1,16 | 0,009399 | 0,337 | 202640_s_at | RAN binding protein 3                                              | <i>RANBP3</i>       |
| 2802  | 5,17     | 4,48    | 1,15 | 0,019474 | 0,380 | 1553300_a_a | Diacylglycerol kinase, eta                                         | <i>DGKH</i>         |
| 5623  | 3,99     | 3,46    | 1,15 | 0,044911 | 0,436 | 204748_at   | Prostaglandin-endoperoxide synthase 2                              | <i>PTGS2</i>        |
| 6096  | 80,8     | 70,0    | 1,15 | 0,049756 | 0,446 | 203291_at   | CCR4-NOT transcription complex, subunit 4                          | <i>CNOT4</i>        |
| 955   | 10,6     | 9,16    | 1,15 | 0,005504 | 0,315 | 210535_at   | B9 protein                                                         | <i>EPPB9</i>        |
| 5015  | 19,2     | 16,6    | 1,15 | 0,038580 | 0,420 | 1570078_a_a | Dedicator of cytokinesis 5                                         | <i>DOCK5</i>        |
| 1323  | 3,68     | 3,19    | 1,15 | 0,007915 | 0,327 | 215339_at   | Natural killer-tumor recognition sequence                          | <i>NKTR</i>         |
| 409   | 6,64     | 5,76    | 1,15 | 0,002148 | 0,286 | 1558874_a_a | cDNA clone YP97H11                                                 | -                   |
| 3103  | 4,08     | 3,54    | 1,15 | 0,021909 | 0,386 | 216997_x_at | Transducin-like enhancer of split 4 (E(sp1) homolog, Drosophila)   | <i>TLE4</i>         |
| 618   | 8,68     | 7,52    | 1,15 | 0,003500 | 0,308 | 232878_at   | Hypothetical protein LOC644192                                     | <i>LOC644192</i>    |
| 1657  | 4330     | 3757    | 1,15 | 0,010453 | 0,345 | 213828_x_at | H3 histone, family 3A                                              | <i>H3F3A</i>        |
| 5731  | 22,9     | 19,9    | 1,15 | 0,045976 | 0,438 | 241757_x_at | Dynein, cytoplasmic 2, light intermediate chain 1                  | <i>DYNC2L1</i>      |
| 4639  | 6,10     | 5,29    | 1,15 | 0,034982 | 0,412 | 241776_at   | Transcribed locus                                                  | -                   |
| 3907  | 5,79     | 5,02    | 1,15 | 0,028526 | 0,399 | 244755_at   | Xenotropic and polytropic retrovirus receptor                      | <i>XPR1</i>         |
| 3617  | 26,0     | 22,6    | 1,15 | 0,026116 | 0,395 | 220215_at   | Zinc finger protein 669                                            | <i>ZNF669</i>       |
| 1878  | 6,59     | 5,72    | 1,15 | 0,012155 | 0,354 | 235492_at   | Ring finger protein 217                                            | <i>RNF217</i>       |
| 304   | 9,32     | 8,10    | 1,15 | 0,001467 | 0,263 | 1563283_at  | cDNA clone IMAGE:4828909                                           | -                   |
| 1643  | 5,61     | 4,88    | 1,15 | 0,010350 | 0,344 | 1553211_at  | Ankyrin-repeat and fibronectin type III domain containing 1        | <i>ANKFN1</i>       |
| 5568  | 5,38     | 4,68    | 1,15 | 0,044332 | 0,435 | 237622_at   | Transcribed locus                                                  | -                   |
| 5870  | 4,16     | 3,62    | 1,15 | 0,047434 | 0,442 | 235575_at   | Succinate dehydrogenase complex, subunit A, flavoprotein           | <i>SDHALP2</i>      |
| 1571  | 8,63     | 7,51    | 1,15 | 0,009762 | 0,340 | 204680_s_at | Rap guanine nucleotide exchange factor (GEF) 5                     | <i>RAPGEF5</i>      |
| 3713  | 209      | 182     | 1,15 | 0,026924 | 0,396 | 219097_x_at | Chromosome 19 open reading frame 42                                | <i>C19orf42</i>     |
| 1267  | 4345     | 3782    | 1,15 | 0,007544 | 0,325 | 208755_x_at | H3 histone, family 3A                                              | <i>H3F3A</i>        |
| 4437  | 5,33     | 4,64    | 1,15 | 0,033242 | 0,410 | 242916_at   | Centrosomal protein 110kDa                                         | <i>CEP110</i>       |
| 4868  | 6,57     | 5,73    | 1,15 | 0,037156 | 0,417 | 230451_at   | DISC1 disrupted in schizophrenia 1                                 | <i>DISC1</i>        |
| 399   | 6,36     | 5,54    | 1,15 | 0,002090 | 0,285 | 236306_at   | KIAA2026 protein                                                   | <i>KIAA2026</i>     |
| 5557  | 14,7     | 12,8    | 1,15 | 0,044236 | 0,435 | 232566_at   | Nucleolar protein family 6 (RNA-associated)                        | <i>NOL6</i>         |
| 3042  | 22,5     | 19,6    | 1,15 | 0,021428 | 0,385 | 240494_at   | CTD small phosphatase-like protein                                 | <i>CTDSPL</i>       |
| 1523  | 19,6     | 17,1    | 1,15 | 0,009416 | 0,337 | 233065_at   | Ring finger protein 207                                            | <i>RNF207</i>       |
| 4301  | 8,35     | 7,29    | 1,15 | 0,032011 | 0,407 | 238608_at   | Laminin, beta 1                                                    | <i>LAMB1</i>        |
| 4455  | 5,15     | 4,50    | 1,15 | 0,033465 | 0,411 | 206035_at   | v-rel reticuloendotheliosis viral oncogene homolog (avian)         | <i>REL</i>          |
| 4727  | 6,16     | 5,38    | 1,15 | 0,035769 | 0,414 | 236678_at   | Jagged 1 (Alagille syndrome)                                       | <i>JAG1</i>         |
| 4000  | 12,4     | 10,8    | 1,15 | 0,029274 | 0,400 | 227225_at   | Hypothetical gene supported by AK125693                            | <i>LOC439985</i>    |
| 5801  | 18,9     | 16,5    | 1,14 | 0,046784 | 0,441 | 219617_at   | Chromosome 2 open reading frame 34                                 | <i>C2orf34</i>      |
| 4365  | 9,04     | 7,90    | 1,14 | 0,032466 | 0,407 | 209359_x_at | Runt-related transcription factor 1 (aml1 oncogene)                | <i>RUNX1</i>        |
| 6095  | 5,42     | 4,73    | 1,14 | 0,049745 | 0,446 | 235540_at   | Gonadotropin-releasing hormone 1                                   | <i>GNRH1</i>        |
| 4077  | 17,1     | 15,0    | 1,14 | 0,029919 | 0,401 | 240134_at   | WWC family member 3                                                | <i>WWC3</i>         |
| 5424  | 5,20     | 4,54    | 1,14 | 0,042684 | 0,430 | 220842_at   | Abelson helper integration site 1                                  | <i>AHI1</i>         |
| 5730  | 1453     | 1271    | 1,14 | 0,045972 | 0,438 | 222229_x_at | Similar to 60S ribosomal protein L26                               | <i>LOC392501</i>    |
| 1566  | 5,21     | 4,56    | 1,14 | 0,009729 | 0,340 | 1556113_at  | cDNA DKFZp451A211 protein                                          | <i>DKFZp451A211</i> |
| 3788  | 8,76     | 7,66    | 1,14 | 0,027581 | 0,398 | 215415_s_at | Lysosomal trafficking regulator                                    | <i>LYST</i>         |
| 5685  | 157      | 138     | 1,14 | 0,045379 | 0,436 | 222207_x_at | Williams Beuren syndrome chromosome region 19 pseudogene           | <i>LOC389517</i>    |
| 5041  | 19,7     | 17,2    | 1,14 | 0,038851 | 0,420 | 236629_at   | Chromosome 1 open reading frame 69                                 | <i>C1orf69</i>      |
| 2188  | 5,56     | 4,86    | 1,14 | 0,014490 | 0,361 | 244340_x_at | -                                                                  | -                   |
| 3242  | 4,96     | 4,34    | 1,14 | 0,022993 | 0,388 | 219685_at   | Transmembrane protein 35                                           | <i>TMEM35</i>       |
| 3058  | 6,77     | 5,93    | 1,14 | 0,021531 | 0,385 | 228656_at   | Prospero homeobox 1                                                | <i>PROX1</i>        |
| 330   | 3,65     | 3,20    | 1,14 | 0,001639 | 0,272 | 1558920_at  | Solute carrier family 8 (sodium/calcium exchanger), member 1       | <i>SCL8A1</i>       |



| Index | Mutated* | Normal* | FC   | P value  | FDR** | Probe set   | Description                                                       | Gene symbol |
|-------|----------|---------|------|----------|-------|-------------|-------------------------------------------------------------------|-------------|
| 5553  | 16,5     | 14,5    | 1,14 | 0,044202 | 0,435 | 229392_s_at | Phosphoinositide-3-kinase, regulatory subunit 2 (p85 beta)        | PIK3R2      |
| 5946  | 44,1     | 38,6    | 1,14 | 0,048181 | 0,443 | 201213_at   | Protein phosphatase 1, regulatory (inhibitor) subunit 7           | PPP1R7      |
| 6097  | 3,64     | 3,19    | 1,14 | 0,049760 | 0,446 | 220474_at   | Solute carrier family 25 member 21                                | SLC25A21    |
| 2656  | 6,25     | 5,47    | 1,14 | 0,018114 | 0,373 | 204110_at   | Histamine N-methyltransferase                                     | HNMT        |
| 5060  | 9,64     | 8,45    | 1,14 | 0,038956 | 0,420 | 214600_at   | TEA domain family member 1 (SV40 transcriptional enhancer factor) | TEAD1       |
| 4507  | 4,66     | 4,09    | 1,14 | 0,033953 | 0,412 | 234020_x_at | Copper metabolism (Murr1) domain containing 1                     | COMMD1      |
| 3518  | 9,93     | 8,71    | 1,14 | 0,025254 | 0,392 | 239306_at   | Chromosome 14 open reading frame 93                               | C14orf93    |
| 4404  | 318      | 279     | 1,14 | 0,032875 | 0,408 | 223060_at   | Chromosome 14 open reading frame 119                              | C14orf119   |
| 2100  | 4,12     | 3,61    | 1,14 | 0,013760 | 0,358 | 237963_x_at | KIAA1529 protein                                                  | KIAA1529    |
| 898   | 5,51     | 4,83    | 1,14 | 0,005203 | 0,313 | 232858_at   | Sex comb on midleg homolog 1 (Drosophila)                         | SCMH1       |
| 2973  | 5,53     | 4,85    | 1,14 | 0,020879 | 0,384 | 1560332_at  | Carbohydrate (chondroitin) sulfotransferase 11                    | CHST11      |
| 3797  | 3843     | 3374    | 1,14 | 0,027660 | 0,398 | 200012_x_at | Ribosomal protein L21                                             | RPL21       |
| 3156  | 7,97     | 7,00    | 1,14 | 0,022400 | 0,387 | 205783_at   | Kallikrein-related peptidase 13                                   | KLK13       |
| 1298  | 4,16     | 3,66    | 1,14 | 0,007724 | 0,325 | 222172_at   | Neuronal PAS domain protein 3                                     | NPAS3       |
| 1818  | 4,02     | 3,53    | 1,14 | 0,011714 | 0,351 | 209125_at   | Keratin 6A                                                        | KRT6A       |
| 5661  | 8,37     | 7,36    | 1,14 | 0,045180 | 0,436 | 205520_at   | Striatin, calmodulin binding protein                              | STRN        |
| 5006  | 27,6     | 24,3    | 1,14 | 0,038454 | 0,420 | 1556066_at  | Jumonji domain containing 3                                       | JMJD3       |
| 2039  | 24,9     | 21,9    | 1,14 | 0,013274 | 0,355 | 1556014_at  | Mesoderm posterior 2 homolog (mouse)                              | MESP2       |
| 6072  | 197      | 173     | 1,14 | 0,049585 | 0,446 | 203043_at   | Zinc finger, BED-type containing 1                                | ZBED1       |
| 4770  | 10,3     | 9,02    | 1,14 | 0,036157 | 0,414 | 233117_at   | Microtubule-associated protein tau                                | MAPT        |
| 3927  | 236      | 207     | 1,14 | 0,028727 | 0,399 | 226024_at   | Copper metabolism (Murr1) domain containing 1                     | COMMD1      |
| 6100  | 14,6     | 12,8    | 1,14 | 0,049799 | 0,446 | 211993_at   | WNK lysine deficient protein kinase 1                             | WNK1        |
| 1065  | 4,65     | 4,09    | 1,14 | 0,006246 | 0,319 | 239980_at   | Chromosome 22 open reading frame 28                               | C22orf28    |
| 4509  | 4,84     | 4,27    | 1,14 | 0,033981 | 0,412 | 220986_s_at | Tigger transposable element derived 6                             | TIGD6       |
| 5948  | 4,33     | 3,81    | 1,14 | 0,048197 | 0,443 | 236277_at   | p21 protein (Cdc42/Rac)-activated kinase 3                        | PAK3        |
| 1186  | 7,05     | 6,21    | 1,14 | 0,006976 | 0,322 | 207552_at   | ATP synthase proteolipid P2                                       | ATP5G2      |
| 2182  | 11,6     | 10,2    | 1,13 | 0,014441 | 0,361 | 1558484_s_a | Leucine rich repeat containing 27                                 | LRRC27      |
| 5647  | 15,2     | 13,4    | 1,13 | 0,045057 | 0,436 | 214492_at   | Sarcoglycan, delta (35kDa dystrophin-associated glycoprotein)     | SGCD        |
| 4733  | 3,55     | 3,13    | 1,13 | 0,035831 | 0,414 | 237825_x_at | Transcribed locus                                                 | -           |
| 4379  | 5,24     | 4,62    | 1,13 | 0,032568 | 0,407 | 1559394_a_a | Receptor tyrosine kinase-like orphan receptor 1                   | ROR1        |
| 4943  | 5,25     | 4,63    | 1,13 | 0,037929 | 0,419 | 242636_at   | Prolylcarboxypeptidase (angiotensinase C)                         | PRCP        |
| 2667  | 4,33     | 3,82    | 1,13 | 0,018241 | 0,374 | 232538_at   | FLJ23573 fis, clone LNG12520                                      | -           |
| 648   | 4,60     | 4,06    | 1,13 | 0,003681 | 0,308 | 215635_at   | Phosphodiesterase 8A                                              | PDE8A       |
| 5602  | 11,8     | 10,4    | 1,13 | 0,044708 | 0,436 | 1556229_at  | Carboxylate kinase-like                                           | CARLK       |
| 5585  | 6,75     | 5,97    | 1,13 | 0,044528 | 0,436 | 230067_at   | Family with sequence similarity 124A                              | FAM124A     |
| 5103  | 5,21     | 4,61    | 1,13 | 0,039244 | 0,420 | 241041_at   | Solute carrier family 8 (sodium/calcium exchanger), member 1      | SLC8A1      |
| 2533  | 24,5     | 21,7    | 1,13 | 0,017131 | 0,369 | 226836_at   | SFT2 domain containing 1                                          | SFT2D1      |
| 3962  | 311      | 275     | 1,13 | 0,028950 | 0,399 | 1555948_s_a | Family with sequence similarity 120A                              | FAM120A     |
| 4092  | 43,6     | 38,6    | 1,13 | 0,030080 | 0,402 | 219128_at   | Chromosome 2 open reading frame 42                                | C2orf42     |
| 3619  | 5,35     | 4,74    | 1,13 | 0,026136 | 0,395 | 221625_at   | cDNA FLJ46609 fis, clone TKIDN2010200                             | -           |
| 398   | 3,84     | 3,41    | 1,13 | 0,002087 | 0,285 | 1554413_s_a | RUN domain containing 2B                                          | RUNDC2B     |
| 1773  | 5868     | 5198    | 1,13 | 0,011296 | 0,348 | 206559_x_at | Eukaryotic translation elongation factor 1 alpha 1                | EEF1A1      |
| 4078  | 11,6     | 10,2    | 1,13 | 0,029924 | 0,401 | 209327_s_at | NOP16 nucleolar protein homolog (yeast)                           | NOP16       |
| 4722  | 42,3     | 37,5    | 1,13 | 0,035711 | 0,413 | 217142_at   | Eukaryotic translation elongation factor 1 alpha 1                | EEF1A1      |
| 5143  | 13,0     | 11,5    | 1,13 | 0,039594 | 0,421 | 231658_x_at | Ribosomal protein L36                                             | RPL36       |
| 4222  | 19,9     | 17,6    | 1,13 | 0,031290 | 0,405 | 228663_x_at | FLT3-interacting zinc finger 1                                    | FIZ1        |
| 3825  | 5,00     | 4,44    | 1,13 | 0,027925 | 0,399 | 236354_at   | Zinc finger, MYND domain containing 17                            | ZMYND17     |
| 4776  | 8,93     | 7,92    | 1,13 | 0,036212 | 0,414 | 229859_at   | Intercellular adhesion molecule 3                                 | ICAM3       |
| 6052  | 6,45     | 5,72    | 1,13 | 0,049331 | 0,446 | 1569608_x_a | Similar to ankyrin repeat domain 20A                              | LOC643187   |
| 2140  | 7,37     | 6,55    | 1,13 | 0,014073 | 0,360 | 214401_at   | Paired box 1                                                      | PAX1        |
| 1360  | 4,63     | 4,11    | 1,13 | 0,008199 | 0,328 | 1560230_at  | Supervillin                                                       | SVIL        |
| 5465  | 228      | 203     | 1,13 | 0,043161 | 0,432 | 202469_s_at | Cleavage and polyadenylation specific factor 6, 68kDa             | CPSF6       |
| 4918  | 95,9     | 85,2    | 1,13 | 0,037660 | 0,419 | 200767_s_at | Family with sequence similarity 120A                              | FAM120A     |
| 1852  | 3,70     | 3,29    | 1,13 | 0,011938 | 0,352 | 236999_at   | Peptidylprolyl isomerase domain and WD repeat containing 1        | PPWD1       |
| 3405  | 9,70     | 8,62    | 1,13 | 0,024293 | 0,390 | 1553169_at  | Chromosome 20 open reading frame 75                               | C20orf75    |
| 5786  | 31,4     | 27,9    | 1,13 | 0,046596 | 0,440 | 220411_x_at | Podocan-like 1                                                    | PODNL1      |
| 1192  | 6,06     | 5,38    | 1,13 | 0,007032 | 0,322 | 214445_at   | Elongation factor, RNA polymerase II, 2                           | ELL2        |

| Index | Mutated* | Normal* | FC   | P value  | FDR** | Probe set   | Description                                                            | Gene symbol         |
|-------|----------|---------|------|----------|-------|-------------|------------------------------------------------------------------------|---------------------|
| 5894  | 5,66     | 5,03    | 1,13 | 0,047683 | 0,442 | 237671_at   | RAD51-like 1 ( <i>S. cerevisiae</i> )                                  | <i>RAD51L1</i>      |
| 5038  | 19,4     | 17,2    | 1,13 | 0,038809 | 0,420 | 214525_x_at | MutL homolog 3 ( <i>E. coli</i> )                                      | <i>MLH3</i>         |
| 3155  | 6,96     | 6,19    | 1,13 | 0,022379 | 0,387 | 229188_s_at | Zinc and ring finger 2                                                 | <i>ZNRF2</i>        |
| 2882  | 7,89     | 7,02    | 1,12 | 0,020225 | 0,383 | 206012_at   | Left-right determination factor 2                                      | <i>LEFTY2</i>       |
| 1316  | 4303     | 3828    | 1,12 | 0,007836 | 0,325 | 213347_x_at | Ribosomal protein S4, X-linked                                         | <i>RPS4X</i>        |
| 2363  | 575      | 511     | 1,12 | 0,015774 | 0,364 | 207988_s_at | Actin related protein 2/3 complex, subunit 2, 34kDa                    | <i>ARPC2</i>        |
| 4226  | 5340     | 4753    | 1,12 | 0,031322 | 0,405 | 216520_s_at | Tumor protein, translationally-controlled 1                            | <i>TPT1</i>         |
| 215   | 3,91     | 3,48    | 1,12 | 0,000963 | 0,244 | 214034_at   | Endoplasmic reticulum aminopeptidase 1                                 | <i>ARTS-1</i>       |
| 3345  | 7,84     | 6,99    | 1,12 | 0,023759 | 0,388 | 236688_at   | FERM and PDZ domain containing 3                                       | <i>FRMPD3</i>       |
| 5938  | 13,8     | 12,3    | 1,12 | 0,048146 | 0,443 | 1563529_at  | Hydrocephalus inducing homolog 2 (mouse)                               | <i>HYDIN2</i>       |
| 4184  | 6,51     | 5,80    | 1,12 | 0,030944 | 0,404 | 241494_at   | Serine incorporator 5                                                  | <i>SERINC5</i>      |
| 2583  | 3,86     | 3,44    | 1,12 | 0,017527 | 0,371 | 241913_at   | Kelch-like 8 ( <i>Drosophila</i> )                                     | <i>KLHL8</i>        |
| 534   | 5,12     | 4,57    | 1,12 | 0,002857 | 0,292 | 238786_at   | Transcribed locus                                                      | -                   |
| 5490  | 6,77     | 6,04    | 1,12 | 0,043450 | 0,433 | 236779_at   | Mitochondrial ribosomal protein S5                                     | <i>MRPS5</i>        |
| 99    | 3,49     | 3,12    | 1,12 | 0,000386 | 0,213 | 208054_at   | Hect domain and RLD 4                                                  | <i>HERC4</i>        |
| 6060  | 6,42     | 5,73    | 1,12 | 0,049414 | 0,446 | 234697_x_at | Chromosome 3 open reading frame 31                                     | <i>C3orf31</i>      |
| 3228  | 8,41     | 7,52    | 1,12 | 0,022897 | 0,388 | 236869_at   | Transcribed locus                                                      | -                   |
| 4300  | 12,7     | 11,3    | 1,12 | 0,032007 | 0,407 | 1553346_a_a | Trinucleotide repeat containing 6A                                     | <i>TNRC6A</i>       |
| 1949  | 4,07     | 3,64    | 1,12 | 0,012725 | 0,355 | 219195_at   | PPAR-gamma coactivator 1-alpha                                         | <i>PPARGC1A</i>     |
| 772   | 3,70     | 3,31    | 1,12 | 0,004423 | 0,311 | 1563389_at  | cDNA clone IMAGE:4836780                                               | -                   |
| 839   | 4,06     | 3,63    | 1,12 | 0,004807 | 0,313 | 1557275_a_a | cDNA FLJ20031 fis, clone ADSU02180                                     | -                   |
| 3879  | 5,03     | 4,50    | 1,12 | 0,028335 | 0,399 | 244206_at   | AN1, ubiquitin-like, homolog ( <i>Xenopus laevis</i> )                 | <i>ANUBL1</i>       |
| 1774  | 11,6     | 10,4    | 1,12 | 0,011299 | 0,348 | 219674_s_at | High density lipoprotein binding protein (vigilin)                     | <i>HDLBP</i>        |
| 4871  | 6,08     | 5,44    | 1,12 | 0,037185 | 0,417 | 207653_at   | Forkhead box D2                                                        | <i>FOXD2</i>        |
| 3876  | 4,81     | 4,31    | 1,12 | 0,028314 | 0,399 | 211086_x_at | NIMA (never in mitosis gene a)-related kinase 1                        | <i>NEK1</i>         |
| 5238  | 4,09     | 3,67    | 1,12 | 0,040574 | 0,423 | 217057_s_at | GNAS complex locus                                                     | <i>GNAS</i>         |
| 1982  | 3,45     | 3,09    | 1,12 | 0,012935 | 0,355 | 1566787_at  | Similar to poly (ADP-ribose) glycohydrolase                            | <i>PARG</i>         |
| 4711  | 10,2     | 9,13    | 1,12 | 0,035646 | 0,413 | 177_at      | Phospholipase D1, phosphatidylcholine-specific                         | <i>PLD1</i>         |
| 2696  | 7138     | 6404    | 1,11 | 0,018486 | 0,375 | 204892_x_at | Eukaryotic translation elongation factor 1 alpha 1                     | <i>EEF1A1</i>       |
| 3253  | 4,23     | 3,80    | 1,11 | 0,023081 | 0,388 | 243008_at   | RAS homolog enriched in brain                                          | <i>RHEB</i>         |
| 2949  | 14,9     | 13,4    | 1,11 | 0,020711 | 0,384 | 219626_at   | MAP7 domain containing 3                                               | <i>MAP7D3</i>       |
| 2859  | 4,55     | 4,09    | 1,11 | 0,020072 | 0,383 | 236944_at   | Transcribed locus                                                      | -                   |
| 481   | 4,28     | 3,85    | 1,11 | 0,002572 | 0,289 | 1556800_a_a | Glutamate receptor, metabotropic 8                                     | <i>GRM8</i>         |
| 1684  | 3,91     | 3,51    | 1,11 | 0,010646 | 0,345 | 1558964_at  | FAT tumor suppressor homolog 3 ( <i>Drosophila</i> )                   | <i>FAT3</i>         |
| 5087  | 5,80     | 5,21    | 1,11 | 0,039159 | 0,420 | 229311_at   | G kinase anchoring protein 1                                           | <i>GKAP1</i>        |
| 821   | 3,96     | 3,56    | 1,11 | 0,004689 | 0,312 | 1553630_at  | Chromosome 10 open reading frame 107                                   | <i>C10orf107</i>    |
| 2205  | 5,54     | 4,99    | 1,11 | 0,014575 | 0,361 | 222337_at   | Oxysterol binding protein-like 9                                       | <i>OSBPL9</i>       |
| 257   | 3,17     | 2,86    | 1,11 | 0,001202 | 0,256 | 215647_at   | RNA binding motif protein 26                                           | <i>RBM26</i>        |
| 2774  | 6,94     | 6,25    | 1,11 | 0,019258 | 0,380 | 234079_at   | Rho-guanine nucleotide exchange factor                                 | <i>RGNEF</i>        |
| 1908  | 3,78     | 3,40    | 1,11 | 0,012416 | 0,355 | 230081_at   | Phosphatidylinositol-specific phospholipase C, X domain containing 3   | <i>PLCXD3</i>       |
| 4815  | 4,00     | 3,60    | 1,11 | 0,036593 | 0,416 | 220719_at   | Hypothetical protein FLJ13769                                          | <i>FLJ13769</i>     |
| 1363  | 3,57     | 3,22    | 1,11 | 0,008207 | 0,328 | 1567527_at  | Ubiquitin B (UBB) mRNA, 3' UTR and genetic suppressor element          | -                   |
| 354   | 6207     | 5593    | 1,11 | 0,001808 | 0,279 | 212869_x_at | Tumor protein, translationally-controlled 1                            | <i>TPT1</i>         |
| 5376  | 10,1     | 9,07    | 1,11 | 0,042168 | 0,429 | 224458_at   | Chromosome 9 open reading frame 125                                    | <i>C9orf125</i>     |
| 3544  | 415      | 374     | 1,11 | 0,025498 | 0,393 | 200829_x_at | Zinc finger protein 207                                                | <i>ZNF207</i>       |
| 3742  | 10,1     | 9,08    | 1,11 | 0,027228 | 0,397 | 233862_at   | cDNA clone IMAGE:4698949                                               | -                   |
| 5626  | 24,0     | 21,6    | 1,11 | 0,044919 | 0,436 | 243860_at   | Ataxin 1                                                               | <i>ATXN1</i>        |
| 2180  | 5,19     | 4,68    | 1,11 | 0,014410 | 0,361 | 237628_at   | Tryptophanyl tRNA synthetase 2, mitochondrial                          | <i>WARS2</i>        |
| 580   | 4,96     | 4,48    | 1,11 | 0,003183 | 0,300 | 233240_at   | cDNA FLJ10255 fis, clone HEMBB1000852                                  | -                   |
| 5846  | 4,32     | 3,90    | 1,11 | 0,047265 | 0,442 | 238279_x_at | Collagen, type IV, alpha 3 (Goodpasture antigen) binding protein       | <i>COL4A3BP</i>     |
| 6091  | 5114     | 4616    | 1,11 | 0,049719 | 0,446 | 224594_x_at | Actin, beta                                                            | <i>ACTB</i>         |
| 581   | 3,30     | 2,98    | 1,11 | 0,003186 | 0,300 | 242642_at   | NudE nuclear distribution gene E homolog ( <i>A. nidulans</i> )-like 1 | <i>NDEL1</i>        |
| 5747  | 5,56     | 5,02    | 1,11 | 0,046116 | 0,439 | 217201_at   | RAS protein activator like 2                                           | <i>RASAL2</i>       |
| 1960  | 11,4     | 10,3    | 1,11 | 0,012812 | 0,355 | 237331_s_at | Hypothetical protein LOC100128977                                      | <i>LOC100128977</i> |
| 4867  | 7,21     | 6,51    | 1,11 | 0,037151 | 0,417 | 239701_at   | Ectonucleoside triphosphate diphosphohydrolase 1                       | <i>ENTPD1</i>       |
| 3247  | 3,59     | 3,24    | 1,11 | 0,023061 | 0,388 | 232945_at   | pseudouridylyl synthase 10                                             | <i>PUS10</i>        |
| 4528  | 5,53     | 5,00    | 1,11 | 0,034179 | 0,412 | 241711_at   | Transducin (beta)-like 1 X-linked receptor 1                           | <i>TBL1XR1</i>      |

| Index | Mutated* | Normal* | FC   | P value  | FDR** | Probe set   | Description                                                      | Gene symbol      |
|-------|----------|---------|------|----------|-------|-------------|------------------------------------------------------------------|------------------|
| 4439  | 5,07     | 4,58    | 1,11 | 0,033326 | 0,410 | 1559672_a_a | Chromosome 9 open reading frame 93                               | <i>C9orf93</i>   |
| 1143  | 3,42     | 3,09    | 1,11 | 0,006695 | 0,320 | 1558107_at  | FSHD region gene 1 family, member B                              | <i>FRG1B</i>     |
| 3425  | 47,2     | 42,7    | 1,11 | 0,024487 | 0,391 | 209547_s_at | Splicing factor 4                                                | <i>SF4</i>       |
| 87    | 3,61     | 3,27    | 1,10 | 0,000328 | 0,201 | 234588_at   | -                                                                | -                |
| 854   | 5215     | 4721    | 1,10 | 0,004916 | 0,313 | 211943_x_at | Tumor protein, translationally-controlled 1                      | <i>TPT1</i>      |
| 201   | 5945     | 5384    | 1,10 | 0,000925 | 0,244 | 212284_x_at | Tumor protein, translationally-controlled 1                      | <i>TPT1</i>      |
| 3171  | 3,66     | 3,31    | 1,10 | 0,022504 | 0,387 | 231925_at   | CDNA FLJ23006 fis, clone LNG00414                                | -                |
| 5925  | 4,65     | 4,21    | 1,10 | 0,048007 | 0,443 | 237322_at   | Myocardial infarction associated transcript (non-protein coding) | <i>MIAT</i>      |
| 1910  | 4,54     | 4,12    | 1,10 | 0,012436 | 0,355 | 231610_at   | Tau tubulin kinase 2                                             | <i>TTBK2</i>     |
| 3584  | 5,81     | 5,26    | 1,10 | 0,025871 | 0,394 | 1566609_at  | cDNA FLJ25907 fis, clone CBR04607                                | -                |
| 2423  | 3,70     | 3,36    | 1,10 | 0,016202 | 0,365 | 220729_at   | -                                                                | -                |
| 5592  | 4,13     | 3,75    | 1,10 | 0,044609 | 0,436 | 234243_at   | Brix domain containing 5                                         | <i>BXDC5</i>     |
| 4345  | 10,6     | 9,63    | 1,10 | 0,032356 | 0,407 | 201205_at   | Ribosome binding protein 1 homolog 180kDa                        | <i>RRBP1</i>     |
| 1435  | 4,22     | 3,83    | 1,10 | 0,008700 | 0,331 | 241228_at   | Transcribed locus                                                | -                |
| 6093  | 7,75     | 7,04    | 1,10 | 0,049730 | 0,446 | 1562946_at  | cDNA clone IMAGE:3503939                                         | -                |
| 5299  | 4,02     | 3,65    | 1,10 | 0,041287 | 0,426 | 1568777_at  | Echinoderm microtubule associated protein like 5                 | <i>EML5</i>      |
| 849   | 3,93     | 3,57    | 1,10 | 0,004889 | 0,313 | 1556925_at  | Structural maintenance of chromosomes 3                          | <i>SMC3</i>      |
| 5446  | 3,82     | 3,47    | 1,10 | 0,042957 | 0,431 | 1560264_at  | Mastermind-like 3 (Drosophila)                                   | <i>MAML3</i>     |
| 4271  | 4,08     | 3,71    | 1,10 | 0,031749 | 0,406 | 211022_s_at | Alpha thalassemia/mental retardation syndrome X-linked           | <i>ATRX</i>      |
| 3816  | 4684     | 4261    | 1,10 | 0,027829 | 0,399 | 200781_s_at | Ribosomal protein S15a                                           | <i>RPS15A</i>    |
| 1723  | 4,47     | 4,07    | 1,10 | 0,011039 | 0,348 | 1561106_at  | Chromosome 6 open reading frame 217                              | <i>C6orf217</i>  |
| 4542  | 5,12     | 4,66    | 1,10 | 0,034324 | 0,412 | 1555151_s_a | L-threonine dehydrogenase                                        | <i>TDH</i>       |
| 1939  | 6,27     | 5,71    | 1,10 | 0,012633 | 0,355 | 206248_at   | Protein kinase C, epsilon                                        | <i>PRKCE</i>     |
| 2707  | 14,3     | 13,0    | 1,10 | 0,018561 | 0,375 | 227879_at   | AlkB, alkylation repair homolog 7 (E. coli)                      | <i>ALKBH7</i>    |
| 5211  | 3,34     | 3,05    | 1,10 | 0,040226 | 0,422 | 233945_at   | UDP-glucose ceramide glucosyltransferase-like 2                  | <i>UGCGL2</i>    |
| 2890  | 5,84     | 5,32    | 1,10 | 0,020289 | 0,383 | 1553506_at  | Carboxypeptidase O                                               | <i>CPO</i>       |
| 2817  | 3,84     | 3,50    | 1,10 | 0,019664 | 0,381 | 234805_at   | ATPase family, AAA domain containing 1                           | <i>ATAD1</i>     |
| 3316  | 7,61     | 6,95    | 1,10 | 0,023566 | 0,388 | 223953_s_at | Zinc finger and BTB domain containing 37                         | <i>ZBTB37</i>    |
| 2955  | 5,01     | 4,57    | 1,10 | 0,020746 | 0,384 | 239690_at   | Transcribed locus                                                | -                |
| 2734  | 5,23     | 4,77    | 1,10 | 0,018849 | 0,377 | 206962_x_at | Zinc finger protein 638                                          | <i>ZNF638</i>    |
| 4686  | 4622     | 4218    | 1,10 | 0,035378 | 0,413 | 213583_x_at | Eukaryotic translation elongation factor 1 alpha 1               | <i>EEF1A1</i>    |
| 4205  | 4,13     | 3,77    | 1,10 | 0,031091 | 0,404 | 1566106_at  | Mitofusin 2                                                      | <i>MFN2</i>      |
| 5887  | 16,5     | 15,0    | 1,10 | 0,047624 | 0,442 | 239381_at   | Kallikrein-related peptidase 7                                   | <i>KLK7</i>      |
| 1232  | 5,30     | 4,84    | 1,10 | 0,007329 | 0,324 | 228926_s_at | ATP-dependent helicase SMARCA2                                   | <i>SMARCA2</i>   |
| 5025  | 7,92     | 7,24    | 1,09 | 0,038639 | 0,420 | 242624_at   | Actin binding LIM protein family, member 2                       | <i>ABLIM2</i>    |
| 568   | 2167     | 1981    | 1,09 | 0,003107 | 0,299 | 214327_x_at | Tumor protein, translationally-controlled 1                      | <i>TPT1</i>      |
| 1472  | 3,23     | 2,96    | 1,09 | 0,008998 | 0,334 | 221057_at   | Spermatogenesis associated 1                                     | <i>SPATA1</i>    |
| 685   | 3,27     | 2,99    | 1,09 | 0,003927 | 0,308 | 239712_at   | Chromosome 9 open reading frame 93                               | <i>C9orf93</i>   |
| 2083  | 4,30     | 3,93    | 1,09 | 0,013595 | 0,356 | 1558518_at  | TGF-beta activated kinase 1/MAP3K7 binding protein 3             | <i>MAP3K7IP3</i> |
| 3882  | 5272     | 4827    | 1,09 | 0,028346 | 0,399 | 213614_x_at | Eukaryotic translation elongation factor 1 alpha 1               | <i>EEF1A1</i>    |
| 5225  | 3,83     | 3,52    | 1,09 | 0,040414 | 0,423 | 244275_at   | Transcribed locus                                                | -                |
| 4677  | 4,21     | 3,86    | 1,09 | 0,035310 | 0,413 | 1559695_a_a | DLGAP1, Discs, large (Drosophila) homolog-associated protein 1   | <i>DLGAP1</i>    |
| 5864  | 5,00     | 4,59    | 1,09 | 0,047415 | 0,442 | 1561631_at  | Spermatogenesis associated, serine-rich 2-like                   | <i>SPATS2L</i>   |
| 4079  | 3,72     | 3,41    | 1,09 | 0,029936 | 0,401 | 240990_at   | RAB5A, member RAS oncogene family                                | <i>RAB5A</i>     |
| 2236  | 3,57     | 3,28    | 1,09 | 0,014852 | 0,363 | 243316_x_at | Vacuolar protein sorting 26 homolog A (S. pombe)                 | <i>VPS26A</i>    |
| 2071  | 4,21     | 3,86    | 1,09 | 0,013541 | 0,356 | 229171_at   | CENPB DNA-binding domains containing 1                           | <i>CENPBD1</i>   |
| 1346  | 4,46     | 4,09    | 1,09 | 0,008069 | 0,328 | 233227_at   | KIAA1109 protein                                                 | <i>KIAA1109</i>  |
| 5380  | 10,6     | 9,73    | 1,09 | 0,042186 | 0,429 | 204250_s_at | Centrosomal protein 164kDa                                       | <i>CEP164</i>    |
| 2165  | 3,79     | 3,49    | 1,09 | 0,014334 | 0,361 | 244146_at   | DTW domain containing 1                                          | <i>DTWD1</i>     |
| 5990  | 3,50     | 3,21    | 1,09 | 0,048718 | 0,444 | 216595_at   | DnaJ (Hsp40) homolog, subfamily C, member 22                     | <i>DNAJC22</i>   |
| 6026  | 3,63     | 3,34    | 1,09 | 0,049024 | 0,445 | 231930_at   | ELMO/CED-12 domain containing 1                                  | <i>ELMOD1</i>    |
| 5749  | 3,73     | 3,43    | 1,09 | 0,046135 | 0,439 | 1559369_at  | Chromosome 5 open reading frame 44                               | <i>C5orf44</i>   |
| 4484  | 4,35     | 4,01    | 1,09 | 0,033740 | 0,411 | 1556323_at  | CUG triplet repeat, RNA binding protein 2                        | <i>CUGBP2</i>    |
| 2486  | 5,03     | 4,63    | 1,09 | 0,016751 | 0,367 | 216536_at   | Olfactory receptor, family 7, subfamily E, member 19 pseudogene  | <i>OR7E19P</i>   |
| 3003  | 9,32     | 8,59    | 1,09 | 0,021133 | 0,385 | 239085_at   | Jun dimerization protein 2                                       | <i>JDP2</i>      |
| 6124  | 3701     | 3412    | 1,08 | 0,049993 | 0,446 | 229563_s_at | Ribosomal protein L10a                                           | <i>RPL10A</i>    |
| 713   | 3,01     | 2,77    | 1,08 | 0,004092 | 0,308 | 1558667_at  | Spermatogenesis associated 22                                    | <i>SPATA22</i>   |

| Index | Mutated* | Normal* | FC   | P value  | FDR** | Probe set   | Description                                                         | Gene symbol      |
|-------|----------|---------|------|----------|-------|-------------|---------------------------------------------------------------------|------------------|
| 3638  | 3,86     | 3,56    | 1,08 | 0,026309 | 0,395 | 235380_at   | Arachidonate 5-lipoxygenase                                         | <i>ALOX5</i>     |
| 5347  | 3,59     | 3,31    | 1,08 | 0,041919 | 0,429 | 1555038_at  | Erythrocyte membrane protein band 4.1 like 4A                       | <i>EPB41L4A</i>  |
| 396   | 3,17     | 2,93    | 1,08 | 0,002086 | 0,285 | 238203_at   | -                                                                   | -                |
| 3355  | 4,68     | 4,32    | 1,08 | 0,023825 | 0,388 | 232953_at   | Chromosome 20 open reading frame 69                                 | <i>C20orf69</i>  |
| 4708  | 3,94     | 3,65    | 1,08 | 0,035603 | 0,413 | 217571_at   | -                                                                   | -                |
| 3810  | 4,82     | 4,46    | 1,08 | 0,027763 | 0,398 | 211347_at   | CDC14 cell division cycle 14 homolog B ( <i>S. cerevisiae</i> )     | <i>CDC14B</i>    |
| 3067  | 6,32     | 5,85    | 1,08 | 0,021654 | 0,385 | 1563098_at  | EEF1A2 binding protein                                              | <i>EEF1A2BP1</i> |
| 378   | 2,82     | 2,61    | 1,08 | 0,001972 | 0,284 | 1554072_s_a | Coiled-coil domain containing 67                                    | <i>CCDC67</i>    |
| 212   | 3,11     | 2,88    | 1,08 | 0,000958 | 0,244 | 240768_x_at | UBX domain protein 4                                                | <i>UBXD2</i>     |
| 2515  | 4,92     | 4,56    | 1,08 | 0,016944 | 0,368 | 1566040_at  | cDNA DKFZp667F083                                                   | -                |
| 5473  | 3,15     | 2,92    | 1,08 | 0,043268 | 0,432 | 1568916_at  | Spire homolog 2 ( <i>Drosophila</i> )                               | <i>SPIRE2</i>    |
| 3989  | 4,08     | 3,78    | 1,08 | 0,029178 | 0,400 | 210500_at   | Ubiquitin associated protein 2-like                                 | <i>UBAP2L</i>    |
| 802   | 3,24     | 3,01    | 1,08 | 0,004575 | 0,311 | 231391_at   | Cortexin 3                                                          | <i>CTXN3</i>     |
| 5631  | 3,83     | 3,55    | 1,08 | 0,044947 | 0,436 | 239770_at   | Family with sequence similarity 62 (C2 domain containing), member C | <i>FAM62C</i>    |
| 4980  | 3,30     | 3,06    | 1,08 | 0,038210 | 0,419 | 217175_at   | UDP glucuronosyltransferase 2 family, polypeptide B15               | <i>UGT2B15</i>   |
| 4819  | 5425     | 5039    | 1,08 | 0,036637 | 0,416 | 200933_x_at | Ribosomal protein S4, X-linked                                      | <i>RPS4X</i>     |
| 5429  | 10,8     | 10,0    | 1,08 | 0,042726 | 0,430 | 241203_at   | -                                                                   | -                |
| 5654  | 4,69     | 4,36    | 1,07 | 0,045099 | 0,436 | 232179_at   | Hypothetical protein LOC158863                                      | <i>LOC158863</i> |
| 1508  | 3,62     | 3,37    | 1,07 | 0,009285 | 0,337 | 233393_at   | Methionine sulfoxide reductase A                                    | <i>MSRA</i>      |
| 4517  | 4,06     | 3,78    | 1,07 | 0,034044 | 0,412 | 1563044_at  | cDNA clone IMAGE:5164837                                            | -                |
| 5648  | 3,69     | 3,43    | 1,07 | 0,045065 | 0,436 | 240034_at   | Transcribed locus                                                   | -                |
| 6106  | 6,57     | 6,13    | 1,07 | 0,049851 | 0,446 | 210760_x_at | Thyroid hormone receptor interactor 11                              | <i>TRIP11</i>    |
| 3309  | 3,30     | 3,07    | 1,07 | 0,023531 | 0,388 | 222246_at   | Syntaxin binding protein 3                                          | <i>STXBP3</i>    |
| 5679  | 3,00     | 2,79    | 1,07 | 0,045343 | 0,436 | 1560775_at  | cDNA FLJ25185 fis, clone CBR09429                                   | -                |
| 337   | 2,84     | 2,64    | 1,07 | 0,001719 | 0,277 | 234432_at   | Metastasis related protein (MB2)                                    | -                |
| 1597  | 5094     | 4754    | 1,07 | 0,009955 | 0,341 | 207783_x_at | HECT, UBA and WWE domain containing 1                               | <i>HUWE1</i>     |
| 4933  | 4,96     | 4,63    | 1,07 | 0,037824 | 0,419 | 242038_at   | Leucine rich repeat containing 8 family, member B                   | <i>LRRC8B</i>    |
| 155   | 2,66     | 2,49    | 1,07 | 0,000705 | 0,244 | 1569810_at  | cDNA clone IMAGE:5271710                                            | -                |
| 5362  | 8,52     | 7,96    | 1,07 | 0,042063 | 0,429 | 215500_at   | Similar to RIKEN cDNA 4933437K13                                    | <i>LOC92017</i>  |
| 5656  | 3,11     | 2,91    | 1,07 | 0,045103 | 0,436 | 1561362_at  | cDNA FLJ36285 fis, clone THYMU2003470                               | -                |
| 5953  | 5,29     | 4,94    | 1,07 | 0,048296 | 0,444 | 217004_s_at | MCF.2 cell line derived transforming sequence                       | <i>MCF2</i>      |
| 860   | 3,08     | 2,88    | 1,07 | 0,004964 | 0,313 | 1563053_at  | Coiled-coil domain containing 13                                    | <i>CCDC13</i>    |
| 6087  | 3,07     | 2,87    | 1,07 | 0,049696 | 0,446 | 243262_at   | -                                                                   | -                |
| 3714  | 5,01     | 4,69    | 1,07 | 0,026935 | 0,396 | 240641_at   | Transcribed locus                                                   | -                |
| 1936  | 3,25     | 3,05    | 1,07 | 0,012615 | 0,355 | 1564273_at  | Jelch domain containing 1                                           | <i>KLHDC1</i>    |
| 5077  | 3,16     | 2,96    | 1,07 | 0,039053 | 0,420 | 237830_at   | -                                                                   | -                |
| 5312  | 3,51     | 3,29    | 1,07 | 0,041437 | 0,426 | 1557869_at  | Mitochondrial ribosomal protein L55                                 | <i>MRPL55</i>    |
| 1693  | 3,68     | 3,45    | 1,07 | 0,010710 | 0,346 | 1562139_a_a | Forkhead box P2                                                     | <i>FOXP2</i>     |
| 4619  | 3,79     | 3,55    | 1,07 | 0,034847 | 0,412 | 241264_at   | WD repeat domain 7                                                  | <i>WDR7</i>      |
| 2347  | 3,58     | 3,35    | 1,07 | 0,015661 | 0,364 | 1566867_at  | Ataxin 2-binding protein 1                                          | <i>A2BP1</i>     |
| 4666  | 2,97     | 2,78    | 1,07 | 0,035242 | 0,413 | 244817_at   | Inhibitor of growth family, member 1                                | <i>ING1</i>      |
| 3166  | 2,88     | 2,70    | 1,07 | 0,022463 | 0,387 | 216097_at   | PHD finger protein 14                                               | <i>PHF14</i>     |
| 1313  | 2,79     | 2,62    | 1,07 | 0,007827 | 0,325 | 1561331_at  | Chromosome 1 open reading frame 99                                  | <i>C1orf99</i>   |
| 5246  | 3,97     | 3,73    | 1,07 | 0,040612 | 0,423 | 1568826_at  | Hypothetical protein LOC389372                                      | <i>LOC389372</i> |
| 3371  | 3,35     | 3,15    | 1,06 | 0,023978 | 0,389 | 219962_at   | Angiotensin I converting enzyme (peptidyl-dipeptidase A) 2          | <i>ACE2</i>      |
| 5812  | 3,75     | 3,53    | 1,06 | 0,046940 | 0,442 | 209638_x_at | Regulator of G-protein signaling 12                                 | <i>RGS12</i>     |
| 3820  | 4,17     | 3,92    | 1,06 | 0,027890 | 0,399 | 234893_s_at | Dynein, axonemal, heavy chain 6                                     | <i>DNHL1</i>     |
| 3401  | 3,27     | 3,07    | 1,06 | 0,024260 | 0,390 | 216619_at   | GTP-binding protein 10 (putative)                                   | <i>GTPBP10</i>   |
| 5610  | 3,45     | 3,24    | 1,06 | 0,044735 | 0,436 | 1570408_at  | cDNA clone pp9953                                                   | -                |
| 4668  | 3,99     | 3,76    | 1,06 | 0,035244 | 0,413 | 1559109_a_a | Vacuolar protein sorting 53 homolog ( <i>S. cerevisiae</i> )        | <i>VPS53</i>     |
| 3775  | 3,80     | 3,57    | 1,06 | 0,027438 | 0,397 | 1568932_at  | cDNA clone IMAGE:4830452                                            | -                |
| 5932  | 3,34     | 3,15    | 1,06 | 0,048096 | 0,443 | 239905_at   | YTH domain containing 1                                             | <i>YTHDC1</i>    |
| 4193  | 6,73     | 6,35    | 1,06 | 0,030973 | 0,404 | 1561579_at  | Hypothetical protein LOC728445                                      | <i>LOC728445</i> |
| 5734  | 3,04     | 2,87    | 1,06 | 0,045997 | 0,438 | 1569669_at  | Forkhead box R2                                                     | <i>FOXR2</i>     |
| 1907  | 2,98     | 2,81    | 1,06 | 0,012409 | 0,355 | 244412_at   | -                                                                   | -                |
| 5261  | 3,34     | 3,15    | 1,06 | 0,040870 | 0,425 | 234765_at   | Brain-specific angiogenesis inhibitor 3                             | <i>BAI3</i>      |
| 1187  | 3,01     | 2,84    | 1,06 | 0,006997 | 0,322 | 1565877_at  | Nucleoporin 153kDa                                                  | <i>NUP153</i>    |

| Index | Mutated* | Normal* | FC   | P value  | FDR** | Probe set   | Description                                                           | Gene symbol      |
|-------|----------|---------|------|----------|-------|-------------|-----------------------------------------------------------------------|------------------|
| 4934  | 3,95     | 3,73    | 1,06 | 0,037845 | 0,419 | 242904_x_at | Transmembrane protein 66                                              | <i>TMEM66</i>    |
| 4136  | 3,39     | 3,20    | 1,06 | 0,030482 | 0,403 | 1570111_at  | Chromosome 14 open reading frame 48                                   | <i>C14orf48</i>  |
| 5875  | 3,32     | 3,13    | 1,06 | 0,047461 | 0,442 | 1555284_at  | Amyotrophic lateral sclerosis 2 (juvenile)                            | <i>ALS2</i>      |
| 4570  | 3,01     | 2,84    | 1,06 | 0,034557 | 0,412 | 236220_at   | Transcribed locus                                                     | -                |
| 3806  | 2,94     | 2,78    | 1,06 | 0,027714 | 0,398 | 1559035_a_a | Aryl hydrocarbon receptor                                             | <i>ARH</i>       |
| 1854  | 3,00     | 2,84    | 1,06 | 0,011943 | 0,352 | 1562860_at  | cDNA clone IMAGE:5744121                                              | -                |
| 2229  | 3,08     | 2,91    | 1,06 | 0,014807 | 0,363 | 1569823_at  | hypothetical protein LOC440346                                        | <i>LOC440346</i> |
| 5204  | 3,44     | 3,25    | 1,06 | 0,040145 | 0,422 | 216632_at   | Neuron navigator 3                                                    | <i>NAV3</i>      |
| 3104  | 3,49     | 3,30    | 1,06 | 0,021916 | 0,386 | 1552851_at  | Zinc finger and SCAN domain containing 4                              | <i>ZSCAN4</i>    |
| 4771  | 2,98     | 2,82    | 1,06 | 0,036158 | 0,414 | 1570103_at  | Golgi autoantigen, golgin subfamily a, 6-like 9                       | <i>GOLGA6L9</i>  |
| 5784  | 3,18     | 3,01    | 1,06 | 0,046585 | 0,440 | 1566899_at  | Succinate dehydrogenase flavoprotein subunit                          | <i>HSSUCCDH</i>  |
| 5345  | 3,32     | 3,14    | 1,06 | 0,041904 | 0,429 | 240992_at   | Transcribed locus                                                     | -                |
| 3972  | 2,61     | 2,47    | 1,06 | 0,029040 | 0,400 | 1564631_at  | EF-hand calcium binding domain 3                                      | <i>EFCAB3</i>    |
| 3091  | 2,73     | 2,58    | 1,06 | 0,021795 | 0,385 | 241909_at   | Tankyrase, TRF1-interacting ankyrin-related ADP-ribose polymerase 2   | <i>TNKS2</i>     |
| 4524  | 3,05     | 2,89    | 1,06 | 0,034133 | 0,412 | 1561737_at  | cDNA DKFZp667L064                                                     | -                |
| 2764  | 3,17     | 3,00    | 1,05 | 0,019197 | 0,379 | 1555839_a_a | Chromosome 3 open reading frame 79                                    | <i>C3orf79</i>   |
| 3080  | 3,11     | 2,95    | 1,05 | 0,021707 | 0,385 | 1566632_at  | cDNA clone IMAGE:3950788                                              | -                |
| 6062  | 3,69     | 3,50    | 1,05 | 0,049435 | 0,446 | 232585_at   | Tousled-like kinase 2                                                 | <i>TLK2</i>      |
| 5342  | 2,99     | 2,84    | 1,05 | 0,041860 | 0,428 | 207879_at   | -                                                                     | -                |
| 3209  | 4,04     | 3,84    | 1,05 | 0,022721 | 0,387 | 1560358_at  | Phosphorylase kinase, alpha 2                                         | <i>PHKA2</i>     |
| 2850  | 2,79     | 2,65    | 1,05 | 0,019957 | 0,383 | 1566202_at  | Protein phosphatase 3 (formerly 2B), catalytic subunit, alpha isoform | <i>PPP3CA</i>    |
| 4803  | 3,02     | 2,88    | 1,05 | 0,036455 | 0,415 | 1560516_at  | Transmembrane protein 26                                              | <i>TMEM26</i>    |
| 4304  | 2,74     | 2,61    | 1,05 | 0,032035 | 0,407 | 242198_at   | Transcribed locus                                                     | -                |
| 4123  | 2,83     | 2,70    | 1,05 | 0,030324 | 0,402 | 215112_x_at | MCF.2 cell line derived transforming sequence-like 2                  | <i>MCF2L2</i>    |
| 4221  | 2,81     | 2,69    | 1,05 | 0,031284 | 0,405 | 1556873_at  | Mex-3 homolog C (C. elegans)                                          | <i>MEX3C</i>     |
| 5562  | 2,68     | 2,57    | 1,04 | 0,044295 | 0,435 | 234779_at   | -                                                                     | -                |
| 4596  | 2,85     | 2,73    | 1,04 | 0,034768 | 0,412 | 1567878_at  | Defensin, beta 114                                                    | <i>DEFB114</i>   |
| 4665  | 2,72     | 2,61    | 1,04 | 0,035228 | 0,413 | 1554507_at  | N-acetylated alpha-linked acidic dipeptidase 2                        | <i>NAALAD2</i>   |
| 5991  | 2,70     | 2,59    | 1,04 | 0,048724 | 0,444 | 1563040_s_a | cDNA clone IMAGE:5170410                                              | -                |
| 5707  | 2,71     | 2,61    | 1,04 | 0,045697 | 0,438 | 1566930_at  | Transcription factor B2, mitochondrial                                | <i>TFB2M</i>     |

\* Geometric mean of intensities

\*\* False Discovery Rate
