# Supplementary material for: Gene Expression Profiling Reveals New Aspects of PIK3CA Mutation in ERalpha-Positive Breast Cancer: Major Implication of the Wnt Signaling Pathway
Source: PubMed Central journal article supplement (PMC3012715; doi:10.1371/journal.pone.0015647), 2010-12-30
Supplement: pone.0015647.s003.pdf [file pone.0015647.s003.pdf]

| Index | Mutated* | Normal* | FC    | P value | FDR** | Probe set    | Description                                                  | Gene symbol |
|-------|----------|---------|-------|---------|-------|--------------|--------------------------------------------------------------|-------------|
| 4530  | 17,7     | 71,0    | -4,01 | 0,03420 | 0,412 | 233059_at    | Potassium inwardly-rectifying channel, subfamily J, member 3 | KCNJ3       |
| 138   | 32,2     | 114     | -3,52 | 0,00063 | 0,244 | 219438_at    | Na+/K+ transporting ATPase interacting 1                     | NKAIN1      |
| 3114  | 4,70     | 16,3    | -3,47 | 0,02202 | 0,387 | 209988_s_at  | Achaete-scute complex homolog 1 (Drosophila)                 | ASCL1       |
| 5630  | 8,01     | 23,3    | -2,91 | 0,04494 | 0,436 | 207142_at    | Potassium inwardly-rectifying channel, subfamily J, member 3 | KCNJ3       |
| 4210  | 14,9     | 41,0    | -2,76 | 0,03116 | 0,405 | 207141_s_at  | Potassium inwardly-rectifying channel, subfamily J, member 3 | KCNJ3       |
| 967   | 6,75     | 17,6    | -2,60 | 0,00559 | 0,315 | 1552575_a_at | Chromosome 6 open reading frame 141                          | C6orf141    |
| 1303  | 11,7     | 30,1    | -2,57 | 0,00775 | 0,325 | 204637_at    | Glycoprotein hormones, alpha polypeptide                     | CGA         |
| 3604  | 16,1     | 40,3    | -2,51 | 0,02600 | 0,394 | 206110_at    | Histone cluster 1, H3h                                       | HIST1H3H    |
| 482   | 62,0     | 154     | -2,48 | 0,00257 | 0,289 | 213423_x_at  | Tumor suppressor candidate 3                                 | TUSC3       |
| 1833  | 15,0     | 36,6    | -2,44 | 0,01181 | 0,351 | 219312_s_at  | Zinc finger and BTB domain containing 10                     | ZBTB10      |
| 715   | 18,3     | 44,6    | -2,43 | 0,00410 | 0,308 | 231729_s_at  | Calcyphosine                                                 | CAPS        |
| 4909  | 4,37     | 10,5    | -2,41 | 0,03755 | 0,418 | 209987_s_at  | Achaete-scute complex homolog 1 (Drosophila)                 | ASCL1       |
| 2721  | 20,5     | 47,9    | -2,34 | 0,01870 | 0,376 | 233899_x_at  | Zinc finger and BTB domain containing 10                     | ZBTB10      |
| 668   | 53,0     | 121     | -2,29 | 0,00384 | 0,308 | 209228_x_at  | Tumor suppressor candidate 3                                 | TUSC3       |
| 2640  | 58,6     | 133     | -2,26 | 0,01800 | 0,373 | 228562_at    | Zinc finger and BTB domain containing 10                     | ZBTB10      |
| 3143  | 33,2     | 74,8    | -2,25 | 0,02230 | 0,387 | 205352_at    | Serpin peptidase inhibitor, clade I (neuroSerpin), member 1  | SERPINI1    |
| 1620  | 6,92     | 15,5    | -2,24 | 0,01017 | 0,343 | 209227_at    | Tumor suppressor candidate 3                                 | TUSC3       |
| 630   | 31,0     | 67,9    | -2,19 | 0,00357 | 0,308 | 201691_s_at  | Tumor protein D52                                            | TPD52       |
| 5030  | 8,84     | 19,3    | -2,19 | 0,03867 | 0,420 | 206134_at    | ADAM-like, decysin 1                                         | ADAMDEC1    |
| 2632  | 4,98     | 10,8    | -2,18 | 0,01793 | 0,372 | 241436_at    | Sodium channel, nonvoltage-gated 1, gamma                    | SCNN1G      |
| 290   | 54,7     | 119     | -2,17 | 0,00142 | 0,263 | 236655_at    | Tumor protein D52                                            | TPD52       |
| 3718  | 30,8     | 66,0    | -2,14 | 0,02698 | 0,397 | 213201_s_at  | Troponin T type 1 (skeletal, slow)                           | TNNT1       |
| 1456  | 10,0     | 21,5    | -2,14 | 0,00890 | 0,334 | 231728_at    | Calcyphosine                                                 | CAPS        |
| 975   | 31,7     | 67,0    | -2,12 | 0,00567 | 0,315 | 203608_at    | Aldehyde dehydrogenase 5 family, member A1                   | ALDH5A1     |
| 696   | 9,70     | 20,5    | -2,11 | 0,00400 | 0,308 | 220936_s_at  | H2A histone family, member J                                 | H2AFJ       |
| 2086  | 11,3     | 23,6    | -2,09 | 0,01361 | 0,356 | 222863_at    | Zinc finger and BTB domain containing 10                     | ZBTB10      |
| 1868  | 22,7     | 47,1    | -2,07 | 0,01207 | 0,353 | 219607_s_at  | Membrane-spanning 4-domains, subfamily A, member 4           | MS4A4A      |
| 1511  | 37,0     | 74,2    | -2,00 | 0,00931 | 0,337 | 239847_at    | cDNA clone IMAGE:6186815                                     | -           |
| 2925  | 30,3     | 60,6    | -1,99 | 0,02051 | 0,383 | 242245_at    | cDNA FLJ90705 fis, clone PLACE1007591                        | -           |
| 2061  | 12,6     | 25,0    | -1,98 | 0,01344 | 0,356 | 239278_at    | cDNA clone IMAGE:5301129                                     | -           |
| 1092  | 20,2     | 39,9    | -1,98 | 0,00641 | 0,319 | 207469_s_at  | Pirin (iron-binding nuclear protein)                         | PIR         |
| 721   | 7,27     | 14,4    | -1,98 | 0,00412 | 0,308 | 230782_at    | Similar to Sorbitol dehydrogenase (L-itolol 2-dehydrogenase) | LOC653381   |
| 1970  | 8,59     | 17,0    | -1,98 | 0,01287 | 0,355 | 227644_at    | Regulating synaptic membrane exocytosis 4                    | RIMS4       |
| 3815  | 10,5     | 20,5    | -1,95 | 0,02783 | 0,399 | 223565_at    | Hypothetical protein MGC29506                                | MGC29506    |
| 1102  | 6,40     | 12,5    | -1,95 | 0,00646 | 0,319 | 206214_at    | 2-acetyl-1-alkylglycerophosphocholine esterase               | PLA2G7      |
| 879   | 44,4     | 86,4    | -1,95 | 0,00509 | 0,313 | 226424_at    | Calcyphosine                                                 | CAPS        |
| 5208  | 9,34     | 18,1    | -1,93 | 0,04019 | 0,422 | 213906_at    | v-Myb myeloblastosis viral oncogene homolog (avian)-like 1   | MYBL1       |
| 712   | 23,0     | 44,3    | -1,93 | 0,00409 | 0,308 | 218954_s_at  | RNA polymerase III transcription initiation factor BRFU      | BRF2        |
| 744   | 41,2     | 79,2    | -1,92 | 0,00422 | 0,308 | 1558290_a_at | Pvt1 oncogene homolog, MYC activator (mouse)                 | PVT1        |
| 1324  | 14,2     | 27,2    | -1,92 | 0,00793 | 0,327 | 229139_at    | Junctophilin 1                                               | JPH1        |
| 626   | 14,4     | 27,1    | -1,89 | 0,00355 | 0,308 | 220016_at    | AHNAK nucleoprotein                                          | AHNAK       |
| 1012  | 37,1     | 69,9    | -1,89 | 0,00586 | 0,316 | 222312_s_at  | cDNA clone IMAGE:6186815                                     | -           |
| 4227  | 27,5     | 51,7    | -1,88 | 0,03132 | 0,405 | 214038_at    | Chemokine (C-C motif) ligand 8                               | CCL8        |
| 2492  | 8,69     | 16,3    | -1,87 | 0,01679 | 0,367 | 213768_s_at  | Achaete-scute complex homolog 1 (Drosophila)                 | ASCL1       |
| 2288  | 9,72     | 18,1    | -1,86 | 0,01520 | 0,363 | 237031_at    | Full length insert cDNA clone YP08F12                        | -           |
| 3458  | 37,7     | 69,8    | -1,85 | 0,02478 | 0,392 | 222731_at    | Zinc finger, DHHC-type containing 2                          | ZDHHC2      |
| 2767  | 12,3     | 22,5    | -1,83 | 0,01921 | 0,379 | 1554333_at   | Dnaj (Hsp40) homolog, subfamily A, member 4                  | DNAJA4      |
| 2804  | 4,96     | 9,08    | -1,83 | 0,01950 | 0,380 | 235801_at    | -                                                            | -           |
| 1062  | 9,29     | 17,0    | -1,83 | 0,00623 | 0,319 | 236828_at    | Transcribed locus                                            | -           |
| 112   | 91,1     | 165     | -1,81 | 0,00050 | 0,240 | 202779_s_at  | Ubiquitin-conjugating enzyme E2S                             | UBE2S       |
| 817   | 648      | 1176    | -1,81 | 0,00467 | 0,312 | 225245_x_at  | H2A histone family, member J                                 | H2AFJ       |
| 3705  | 36,0     | 65,4    | -1,81 | 0,02679 | 0,395 | 201195_s_at  | Solute carrier family 7, member 5                            | SLC7A5      |
| 554   | 35,8     | 64,6    | -1,81 | 0,00301 | 0,296 | 206066_s_at  | RAD51 homolog C (S. cerevisiae)                              | RAD51C      |
| 868   | 111      | 200     | -1,80 | 0,00502 | 0,313 | 202954_at    | Ubiquitin-conjugating enzyme E2C                             | UBE2C       |
| 1761  | 28,1     | 50,5    | -1,80 | 0,01123 | 0,348 | 221286_s_at  | Hypothetical protein MGC29506                                | MGC29506    |
| 795   | 693      | 1241    | -1,79 | 0,00454 | 0,311 | 224301_x_at  | H2A histone family, member J                                 | H2AFJ       |
| 5280  | 9,64     | 17,2    | -1,79 | 0,04106 | 0,425 | 238646_at    | Transcribed locus                                            | -           |

| Index | Mutated* | Normal* | FC    | P value | FDR** | Probe set    | Description                                                     | Gene symbol |
|-------|----------|---------|-------|---------|-------|--------------|-----------------------------------------------------------------|-------------|
| 5108  | 7,75     | 13,8    | -1,79 | 0,03930 | 0,421 | 205697_at    | Secretagoin, EF-hand calcium binding protein                    | SCGN        |
| 1008  | 35,2     | 62,9    | -1,79 | 0,00585 | 0,316 | 204033_at    | Thyroid hormone receptor interactor 13                          | TRIP13      |
| 2580  | 53,2     | 94,7    | -1,78 | 0,01750 | 0,371 | 229796_at    | SIX homeobox 4                                                  | SIX4        |
| 1883  | 21,4     | 37,8    | -1,76 | 0,01223 | 0,355 | 222730_s_at  | Zinc finger, DHHC-type containing 2                             | ZDHHC2      |
| 3745  | 3,00     | 5,27    | -1,75 | 0,02724 | 0,397 | 235947_at    | Similar to XP_001165016.1                                       | -           |
| 3378  | 24,8     | 43,3    | -1,75 | 0,02404 | 0,389 | 231069_at    | Transcribed locus                                               | -           |
| 915   | 371      | 644     | -1,74 | 0,00527 | 0,313 | 200641_s_at  | 14-3-3 protein/cytosolic phospholipase A2                       | YWHAZ       |
| 1239  | 15,6     | 27,1    | -1,73 | 0,00736 | 0,324 | 235330_at    | Coiled-coil domain containing 117                               | CCDC117     |
| 822   | 4,90     | 8,47    | -1,73 | 0,00469 | 0,312 | 238898_at    | Transcribed locus                                               | -           |
| 2457  | 5,97     | 10,3    | -1,72 | 0,01647 | 0,366 | 209631_s_at  | G protein-coupled receptor 37 (endothelin receptor type B-like) | GPR37       |
| 710   | 10,4     | 17,9    | -1,72 | 0,00407 | 0,308 | 238624_at    | Nemo-like kinase                                                | NLK         |
| 1217  | 87,3     | 150     | -1,72 | 0,00724 | 0,324 | 226384_at    | Phosphatidic acid Phosphatase type 2 domain containing 1B       | PPAPDC1B    |
| 1700  | 39,9     | 68,3    | -1,71 | 0,01082 | 0,348 | 220588_at    | Breast carcinoma amplified sequence 4                           | BCAS4       |
| 3691  | 3,56     | 6,07    | -1,71 | 0,02666 | 0,395 | 1554314_at   | Chromosome 6 open reading frame 141                             | C6orf141    |
| 3065  | 29,1     | 49,5    | -1,70 | 0,02161 | 0,385 | 212314_at    | KIAA0746 protein                                                | KIAA0746    |
| 2204  | 5,88     | 9,96    | -1,69 | 0,01457 | 0,361 | 1556097_at   | cDNA DKFZp686A11113                                             | -           |
| 5191  | 10,2     | 17,3    | -1,69 | 0,03999 | 0,421 | 242338_at    | Transmembrane protein 64                                        | TMEM64      |
| 2284  | 7,04     | 11,9    | -1,69 | 0,01518 | 0,363 | 236514_at    | Acyl-CoA thioesterase 8                                         | ACOT8       |
| 1666  | 23,1     | 39,1    | -1,69 | 0,01053 | 0,345 | 228999_at    | Chromodomain helicase DNA binding protein 2                     | CHD2        |
| 2262  | 70,8     | 120     | -1,69 | 0,01505 | 0,363 | 212690_at    | DDHD domain containing 2                                        | DDHD2       |
| 2397  | 18,6     | 31,4    | -1,69 | 0,01599 | 0,365 | 1555728_a_at | Membrane-spanning 4-domains, subfamily A, member 4              | MS4A4A      |
| 523   | 350      | 589     | -1,68 | 0,00279 | 0,291 | 201688_s_at  | Tumor protein D52                                               | TPD52       |
| 2810  | 57,0     | 95,8    | -1,68 | 0,01955 | 0,380 | 221521_s_at  | GIN5 complex subunit 2 (Psf2 homolog)                           | GIN52       |
| 2627  | 6,05     | 10,1    | -1,68 | 0,01787 | 0,372 | 236105_at    | Transcribed locus                                               | -           |
| 456   | 53,0     | 88,8    | -1,68 | 0,00244 | 0,288 | 239069_s_at  | Similar to KIAA0825 protein [Pan troglodytes]                   | -           |
| 1327  | 108      | 181     | -1,67 | 0,00799 | 0,328 | 226568_at    | Family with sequence similarity 102, member B                   | FAM102B     |
| 1024  | 48,9     | 81,8    | -1,67 | 0,00593 | 0,316 | 1554334_a_at | DnaJ (Hsp40) homolog, subfamily A, member 4                     | DNAJA4      |
| 2085  | 11,0     | 18,4    | -1,67 | 0,01360 | 0,356 | 214481_at    | Histone cluster 1, H2am                                         | HIST1H2AM   |
| 2405  | 77,5     | 129     | -1,66 | 0,01607 | 0,365 | 218245_at    | Tsukushin                                                       | TSKU        |
| 4633  | 13,9     | 23,1    | -1,66 | 0,03495 | 0,412 | 213470_s_at  | Heterogeneous nuclear ribonucleoprotein H1                      | HNRPH1      |
| 2685  | 162      | 269     | -1,66 | 0,01840 | 0,375 | 210519_s_at  | NAD(P)H dehydrogenase, quinone 1                                | NQO1        |
| 1606  | 72,0     | 119     | -1,66 | 0,01006 | 0,342 | 223568_s_at  | Phosphatidic acid Phosphatase type 2 domain containing 1B       | PPAPDC1B    |
| 1302  | 60,3     | 99,7    | -1,65 | 0,00775 | 0,325 | 218955_at    | RNA polymerase III transcription initiation factor BRFU         | BRF2        |
| 2821  | 14,7     | 24,3    | -1,65 | 0,01969 | 0,381 | 212706_at    | RAS p21 protein activator 4                                     | RASA4       |
| 4835  | 15,2     | 25,0    | -1,65 | 0,03687 | 0,417 | 213562_s_at  | Squalene epoxidase                                              | SQLE        |
| 3170  | 37,3     | 61,4    | -1,65 | 0,02250 | 0,387 | 203145_at    | Sperm associated antigen 5                                      | SPAG5       |
| 1098  | 132      | 217     | -1,65 | 0,00644 | 0,319 | 202431_s_at  | v-Myc myelocytomatosis viral oncogene homolog (avian)           | MYC         |
| 559   | 24,5     | 40,2    | -1,64 | 0,00305 | 0,298 | 242304_at    | Within bgcn homolog (Drosophila)                                | WIBG        |
| 3317  | 6,24     | 10,2    | -1,64 | 0,02357 | 0,388 | 244779_at    | cDNA FLJ34038 fis, clone FCBBF2005645                           | -           |
| 3346  | 170      | 279     | -1,64 | 0,02376 | 0,388 | 226150_at    | Phosphatidic acid Phosphatase type 2 domain containing 1B       | PPAPDC1B    |
| 2948  | 18,2     | 29,8    | -1,64 | 0,02068 | 0,384 | 212311_at    | KIAA0746 protein                                                | KIAA0746    |
| 1654  | 213      | 349     | -1,64 | 0,01044 | 0,345 | 203381_s_at  | Apolipoprotein E                                                | APOE        |
| 106   | 361      | 590     | -1,64 | 0,00043 | 0,217 | 218059_at    | Zinc finger protein 706                                         | ZNF706      |
| 3739  | 3,38     | 5,49    | -1,63 | 0,02717 | 0,397 | 206757_at    | Phosphodiesterase 5A, cGMP-specific                             | PDE5A       |
| 2187  | 16,7     | 27,0    | -1,62 | 0,01449 | 0,361 | 230449_x_at  | Similar toUbiquitin-conjugating enzyme E2 variant 1 isoform c   | -           |
| 4174  | 14,5     | 23,4    | -1,62 | 0,03086 | 0,404 | 239862_at    | Transcribed locus                                               | -           |
| 753   | 141      | 228     | -1,62 | 0,00426 | 0,308 | 203382_s_at  | Apolipoprotein E                                                | APOE        |
| 1244  | 7,30     | 11,8    | -1,61 | 0,00739 | 0,324 | 230361_at    | Hypothetical protein KIAA1833                                   | KIAA1833    |
| 2414  | 11,9     | 19,2    | -1,61 | 0,01613 | 0,365 | 238694_at    | Transcribed locus                                               | -           |
| 1845  | 213      | 344     | -1,61 | 0,01187 | 0,352 | 203534_at    | LSM1 homolog, U6 small nuclear RNA associated (S. cerevisiae)   | LSM1        |
| 2960  | 65,1     | 105     | -1,61 | 0,02079 | 0,384 | 203362_s_at  | MAD2 mitotic arrest deficient-like 1 (yeast)                    | MAD2L1      |
| 4603  | 9,86     | 15,9    | -1,61 | 0,03480 | 0,412 | 1560101_at   | Synapse defective 1, Rho GTPase, homolog 2 (C. elegans)         | SYDE2       |
| 2479  | 110      | 177     | -1,61 | 0,01670 | 0,367 | 204416_x_at  | Apolipoprotein C-I                                              | APOC1       |
| 1730  | 42,8     | 68,7    | -1,61 | 0,01105 | 0,348 | 231784_s_at  | WD repeats and SOF1 domain containing                           | WDSOF1      |
| 4462  | 42,7     | 68,5    | -1,60 | 0,03352 | 0,411 | 202095_s_at  | Baculoviral IAP repeat-containing 5 (survivin)                  | BIRC5       |
| 806   | 641      | 1026    | -1,60 | 0,00460 | 0,311 | 225547_at    | Small nucleolar RNA host gene (non-protein coding) 6            | SNHG6       |
| 2891  | 9,33     | 14,9    | -1,60 | 0,02030 | 0,383 | 223574_x_at  | Protein phosphatase 2A1 B gamma subunit                         | PPP2R2C     |

| Index | Mutated* | Normal* | FC    | P value | FDR** | Probe set    | Description                                               | Gene symbol |
|-------|----------|---------|-------|---------|-------|--------------|-----------------------------------------------------------|-------------|
| 1091  | 60,2     | 96,3    | -1,60 | 0,00640 | 0,319 | 227765_at    | cDNA clone IMAGE:4820809                                  | -           |
| 371   | 788      | 1259    | -1,60 | 0,00194 | 0,284 | 200640_at    | 14-3-3 protein/cytosolic phospholipase A2                 | YWHAZ       |
| 1535  | 52,3     | 83,7    | -1,60 | 0,00951 | 0,337 | 225857_s_at  | Hypothetical LOC388796                                    | LOC388796   |
| 3470  | 14,3     | 22,9    | -1,60 | 0,02486 | 0,392 | 219519_s_at  | Sialic acid binding Ig-like lectin 1, sialoadhesin        | SIGLEC1     |
| 436   | 13,6     | 21,8    | -1,60 | 0,00230 | 0,288 | 221908_at    | Transmembrane protein 118                                 | TMEM118     |
| 999   | 412      | 656     | -1,59 | 0,00578 | 0,316 | 201689_s_at  | Tumor protein D52                                         | TPD52       |
| 4713  | 32,5     | 51,7    | -1,59 | 0,03566 | 0,413 | 230422_at    | Formyl peptide receptor-like 2                            | FPRL2       |
| 3859  | 6,94     | 11,0    | -1,59 | 0,02818 | 0,399 | 221345_at    | Free fatty acid receptor 2                                | FFAR2       |
| 4446  | 4,16     | 6,61    | -1,59 | 0,03340 | 0,411 | 1561817_at   | cDNA FLJ35294 fis, clone PROST2008724                     | -           |
| 5258  | 222      | 352     | -1,58 | 0,04077 | 0,424 | 201563_at    | Sorbitol dehydrogenase                                    | SORD        |
| 6067  | 15,5     | 24,6    | -1,58 | 0,04948 | 0,446 | 228645_at    | Small nucleolar RNA host gene (non-protein coding) 9      | SNHG9       |
| 3302  | 18,4     | 28,9    | -1,58 | 0,02351 | 0,388 | 229417_at    | Transcribed locus                                         | -           |
| 4076  | 112      | 176     | -1,57 | 0,02989 | 0,401 | 209218_at    | Squalene epoxidase                                        | SQLE        |
| 3033  | 33,1     | 52,0    | -1,57 | 0,02138 | 0,385 | 65588_at     | Hypothetical LOC388796                                    | LOC388796   |
| 324   | 12,0     | 18,8    | -1,57 | 0,00161 | 0,272 | 230016_at    | Chromosome 8 open reading frame 38                        | C8orf38     |
| 1292  | 679      | 1065    | -1,57 | 0,00770 | 0,325 | 200638_s_at  | 14-3-3 protein/cytosolic phospholipase A2                 | YWHAZ       |
| 4604  | 42,0     | 65,8    | -1,57 | 0,03480 | 0,412 | 227804_at    | TLC domain containing 1                                   | TLCD1       |
| 3849  | 7,38     | 11,6    | -1,57 | 0,02810 | 0,399 | 204920_at    | Carbamoyl-phosphate synthetase 1, mitochondrial           | CPS1        |
| 2481  | 31,5     | 49,3    | -1,57 | 0,01672 | 0,367 | 1554768_a_at | MAD2 mitotic arrest deficient-like 1 (yeast)              | MAD2L1      |
| 2026  | 45,2     | 70,7    | -1,57 | 0,01320 | 0,355 | 227132_at    | Zinc finger protein 706                                   | ZNF706      |
| 2298  | 106      | 165     | -1,56 | 0,01527 | 0,363 | 216336_x_at  | Metallothionein 1A                                        | MT1A        |
| 4938  | 97,1     | 151     | -1,56 | 0,03789 | 0,419 | 201467_s_at  | NAD(P)H dehydrogenase, quinone 1                          | NQO1        |
| 2082  | 64,2     | 99,9    | -1,56 | 0,01358 | 0,356 | 208002_s_at  | Acyl-CoA thioesterase 7                                   | ACOT7       |
| 5213  | 6,59     | 10,3    | -1,56 | 0,04026 | 0,422 | 239752_at    | cDNA FLJ38271 fis, clone FCBBF3002782                     | -           |
| 2013  | 11,1     | 17,3    | -1,55 | 0,01313 | 0,355 | 228213_at    | H2A histone family, member J                              | H2AFJ       |
| 3008  | 191      | 296     | -1,55 | 0,02118 | 0,385 | 206461_x_at  | Metallothionein 1H                                        | MT1H        |
| 321   | 744      | 1155    | -1,55 | 0,00161 | 0,272 | 200639_s_at  | 14-3-3 protein/cytosolic phospholipase A2                 | YWHAZ       |
| 5141  | 34,9     | 54,1    | -1,55 | 0,03959 | 0,421 | 208079_s_at  | Aurora kinase A                                           | AURKA       |
| 2569  | 548      | 850     | -1,55 | 0,01743 | 0,371 | 212185_x_at  | Metallothionein 2A                                        | MT2A        |
| 484   | 634      | 982     | -1,55 | 0,00258 | 0,289 | 201690_s_at  | Tumor protein D52                                         | TPD52       |
| 433   | 32,2     | 49,8    | -1,55 | 0,00228 | 0,288 | 221586_s_at  | E2F transcription factor 5, p130-binding                  | E2F5        |
| 1889  | 179      | 277     | -1,55 | 0,01225 | 0,355 | 225061_at    | DnaJ (Hsp40) homolog, subfamily A, member 4               | DNAJA4      |
| 5865  | 6,76     | 10,4    | -1,54 | 0,04742 | 0,442 | 219159_s_at  | SLAM family member 7                                      | SLAMF7      |
| 4885  | 28,2     | 43,5    | -1,54 | 0,03736 | 0,418 | 223253_at    | Ependymin related protein 1 (zebrafish)                   | EPDR1       |
| 2664  | 149      | 230     | -1,54 | 0,01822 | 0,374 | 235509_at    | Chromosome 8 open reading frame 38                        | C8orf38     |
| 2307  | 19,2     | 29,5    | -1,54 | 0,01532 | 0,363 | 226791_at    | Kinesin family member C2                                  | KIFC2       |
| 4266  | 57,2     | 87,9    | -1,54 | 0,03174 | 0,406 | 202705_at    | Cyclin B2                                                 | CCNB2       |
| 1450  | 163      | 249     | -1,53 | 0,00886 | 0,334 | 202634_at    | Polymerase (RNA) II (DNA directed) polypeptide K, 7.0kDa  | POLR2K      |
| 2047  | 312      | 478     | -1,53 | 0,01331 | 0,355 | 211456_x_at  | Metallothionein 1 pseudogene 2                            | MT1P2       |
| 4171  | 21,4     | 32,8    | -1,53 | 0,03082 | 0,404 | 217080_s_at  | Homer homolog 2 (Drosophila)                              | HOMER2      |
| 2109  | 18,0     | 27,6    | -1,53 | 0,01383 | 0,358 | 238012_at    | Dipeptidyl-peptidase 7                                    | DPP7        |
| 4873  | 43,0     | 65,6    | -1,52 | 0,03720 | 0,417 | 223569_at    | Phosphatidic acid Phosphatase type 2 domain containing 1B | PPAPDC1B    |
| 3697  | 79,2     | 121     | -1,52 | 0,02674 | 0,395 | 226803_at    | Chromatin modifying protein 4C                            | CHMP4C      |
| 1067  | 59,3     | 90,3    | -1,52 | 0,00626 | 0,319 | 227451_s_at  | Coiled-coil domain containing 90A                         | CCDC90A     |
| 1132  | 47,6     | 72,5    | -1,52 | 0,00661 | 0,319 | 222155_s_at  | G protein-coupled receptor 172A                           | GPR172A     |
| 2735  | 88,8     | 135     | -1,52 | 0,01887 | 0,377 | 218514_at    | Chromosome 17 open reading frame 71                       | C17orf71    |
| 5126  | 30,0     | 45,7    | -1,52 | 0,03946 | 0,421 | 210117_at    | Sperm associated antigen 1                                | SPAG1       |
| 3094  | 10,2     | 15,6    | -1,52 | 0,02181 | 0,385 | 236113_at    | Transcribed locus                                         | -           |
| 1542  | 51,1     | 77,6    | -1,52 | 0,00954 | 0,337 | 219188_s_at  | MACRO domain containing 1                                 | MACROD1     |
| 3580  | 28,4     | 43,1    | -1,52 | 0,02586 | 0,394 | 221194_s_at  | PTD016 protein                                            | LOC51136    |
| 2352  | 65,1     | 98,7    | -1,52 | 0,01569 | 0,364 | 201853_s_at  | Cell division cycle 25 homolog B (S. pombe)               | CDC25B      |
| 1295  | 8,69     | 13,2    | -1,52 | 0,00771 | 0,325 | 230330_at    | cDNA FLJ30011 fis, clone 3NB692000276                     | -           |
| 1526  | 22,2     | 33,6    | -1,52 | 0,00943 | 0,337 | 221909_at    | Transmembrane protein 118                                 | TMEM118     |
| 4849  | 12,6     | 19,1    | -1,52 | 0,03694 | 0,417 | 238818_at    | KIAA1429 protein                                          | KIAA1429    |
| 826   | 98,8     | 149     | -1,51 | 0,00471 | 0,312 | 203011_at    | Inositol(myo)-1(or 4)-monophosphatase 1                   | IMPA1       |
| 1796  | 259      | 392     | -1,51 | 0,01156 | 0,351 | 202635_s_at  | Polymerase (RNA) II (DNA directed) polypeptide K, 7.0kDa  | POLR2K      |
| 1998  | 79,4     | 120     | -1,51 | 0,01306 | 0,355 | 219363_s_at  | MTERF domain containing 1                                 | MTERFD1     |

| Index | Mutated* | Normal* | FC    | P value | FDR** | Probe set    | Description                                                           | Gene symbol      |
|-------|----------|---------|-------|---------|-------|--------------|-----------------------------------------------------------------------|------------------|
| 2432  | 21,3     | 32,1    | -1,51 | 0,01626 | 0,365 | 209573_s_at  | Chromosome 18 open reading frame 1                                    | <i>C18orf1</i>   |
| 4252  | 115      | 173     | -1,51 | 0,03157 | 0,406 | 217165_x_at  | Metallothionein 1F                                                    | <i>MT1F</i>      |
| 2676  | 5,02     | 7,57    | -1,51 | 0,01831 | 0,374 | 222309_at    | Chromosome 6 open reading frame 62                                    | <i>C6orf62</i>   |
| 2941  | 4,19     | 6,31    | -1,51 | 0,02062 | 0,383 | 213609_s_at  | Seizure related 6 homolog (mouse)-like                                | <i>SEZ6L</i>     |
| 2636  | 19,5     | 29,3    | -1,51 | 0,01794 | 0,372 | 210334_x_at  | Baculoviral IAP repeat-containing 5 (survivin)                        | <i>BIRC5</i>     |
| 2741  | 7,79     | 11,7    | -1,51 | 0,01891 | 0,377 | 219403_s_at  | Heparanase                                                            | <i>HPSE</i>      |
| 4616  | 11,6     | 17,5    | -1,51 | 0,03484 | 0,412 | 219697_at    | Heparan sulfate (glucosamine) 3-O-sulfotransferase 2                  | <i>HS3ST2</i>    |
| 3007  | 45,5     | 68,4    | -1,50 | 0,02117 | 0,385 | 225203_at    | Protein phosphatase 1, regulatory (inhibitor) subunit 16A             | <i>PPP1R16A</i>  |
| 1627  | 61,5     | 92,6    | -1,50 | 0,01023 | 0,344 | 225378_at    | Vacuolar protein sorting 37 homolog A (S. cerevisiae)                 | <i>VPS37A</i>    |
| 3557  | 108      | 163     | -1,50 | 0,02565 | 0,394 | 224356_x_at  | Membrane-spanning 4-domains, subfamily A, member 6A                   | <i>MS4A6A</i>    |
| 1096  | 7,40     | 11,1    | -1,50 | 0,00642 | 0,319 | 1556613_s_at | Hypothetical protein LOC203107                                        | <i>LOC203107</i> |
| 4441  | 63,7     | 95,5    | -1,50 | 0,03333 | 0,410 | 218009_s_at  | Protein regulator of cytokinesis 1                                    | <i>PRC1</i>      |
| 5480  | 77,2     | 116     | -1,50 | 0,04336 | 0,433 | 235010_at    | Hypothetical protein LOC729013                                        | <i>LOC729013</i> |
| 4289  | 113      | 169     | -1,50 | 0,03189 | 0,406 | 201484_at    | Suppressor of Ty 4 homolog 1 (S. cerevisiae)                          | <i>SUPT4H1</i>   |
| 583   | 28,2     | 42,1    | -1,50 | 0,00319 | 0,300 | 227935_s_at  | Polycomb group ring finger 5                                          | <i>PCGF5</i>     |
| 1331  | 24,8     | 36,9    | -1,49 | 0,00800 | 0,328 | 212563_at    | Block of proliferation 1                                              | <i>BOP1</i>      |
| 1482  | 131      | 195     | -1,49 | 0,00911 | 0,336 | 200924_s_at  | Solute carrier family 3, member 2                                     | <i>SLC3A2</i>    |
| 5681  | 331      | 494     | -1,49 | 0,04535 | 0,436 | 208581_x_at  | Metallothionein 1X                                                    | <i>MT1X</i>      |
| 3589  | 34,3     | 51,0    | -1,49 | 0,02590 | 0,394 | 228024_at    | Vacuolar protein sorting 37 homolog A (S. cerevisiae)                 | <i>VPS37A</i>    |
| 310   | 7,50     | 11,2    | -1,49 | 0,00150 | 0,265 | 241957_x_at  | Lin-7 homolog B (C. elegans)                                          | <i>LIN7B</i>     |
| 848   | 11,3     | 16,7    | -1,48 | 0,00489 | 0,313 | 212619_at    | KIAA0286 protein                                                      | <i>KIAA0286</i>  |
| 4312  | 51,2     | 75,9    | -1,48 | 0,03210 | 0,407 | 226943_at    | Keratin, hair, basic, 5                                               | <i>KRTHB5</i>    |
| 1904  | 44,0     | 65,2    | -1,48 | 0,01238 | 0,355 | 217499_x_at  | Olfactory receptor, family 7, subfamily E, member 37 pseudogene       | <i>OR7E37P</i>   |
| 3996  | 7,81     | 11,6    | -1,48 | 0,02921 | 0,400 | 1555606_a_at | Glycerophosphodiester phosphodiesterase domain containing 1           | <i>GDPD1</i>     |
| 2054  | 4,56     | 6,74    | -1,48 | 0,01336 | 0,356 | 228047_at    | Small nucleolar RNA, H/ACA box 72                                     | <i>SNORA72</i>   |
| 2880  | 22,8     | 33,6    | -1,48 | 0,02021 | 0,383 | 1555461_at   | -                                                                     | -                |
| 2521  | 54,3     | 80,1    | -1,47 | 0,01701 | 0,369 | 228488_at    | TBC1 domain family, member 16                                         | <i>TBC1D16</i>   |
| 5834  | 145      | 213     | -1,47 | 0,04713 | 0,442 | 209185_s_at  | Insulin receptor substrate 2                                          | <i>IRS2</i>      |
| 5303  | 689      | 1015    | -1,47 | 0,04139 | 0,426 | 200800_s_at  | Heat shock 70kDa protein 1A                                           | <i>HSPA1A</i>    |
| 3389  | 33,6     | 49,6    | -1,47 | 0,02414 | 0,389 | 202823_at    | Transcription elongation factor B (SIII), polypeptide 1               | <i>TCEB1</i>     |
| 308   | 134      | 198     | -1,47 | 0,00148 | 0,263 | 218680_x_at  | Huntingtin interacting protein K                                      | <i>HYPK</i>      |
| 3659  | 6,09     | 8,97    | -1,47 | 0,02642 | 0,395 | 239562_at    | NADP-dependent methylenetetrahydrofolate dehydrogenase 2-like protein | <i>MTHFD2L</i>   |
| 3096  | 43,1     | 63,5    | -1,47 | 0,02182 | 0,385 | 222912_at    | Arrestin, beta 1                                                      | <i>ARRB1</i>     |
| 3898  | 14,8     | 21,8    | -1,47 | 0,02848 | 0,399 | 214560_at    | Formyl peptide receptor-like 2                                        | <i>FPRL2</i>     |
| 4720  | 148      | 218     | -1,47 | 0,03570 | 0,413 | 204745_x_at  | Metallothionein 1G                                                    | <i>MT1G</i>      |
| 5517  | 3,53     | 5,18    | -1,47 | 0,04375 | 0,433 | 217564_s_at  | Carbamoyl-phosphate synthetase 1, mitochondrial                       | <i>CPS1</i>      |
| 2150  | 25,3     | 37,2    | -1,47 | 0,01415 | 0,360 | 222026_at    | RNA binding motif (RNP1, RRM) protein 3                               | <i>RBM3</i>      |
| 1615  | 5,69     | 8,34    | -1,47 | 0,01013 | 0,343 | 217599_s_at  | MyoD family inhibitor domain containing                               | <i>MDFIC</i>     |
| 2266  | 53,6     | 78,5    | -1,47 | 0,01507 | 0,363 | 202481_at    | Dehydrogenase/reductase (SDR family) member 3                         | <i>DHRS3</i>     |
| 3731  | 265      | 388     | -1,47 | 0,02709 | 0,397 | 224447_s_at  | Chromosome 17 open reading frame 37                                   | <i>C17orf37</i>  |
| 1588  | 98,9     | 145     | -1,47 | 0,00988 | 0,340 | 221539_at    | Eukaryotic translation initiation factor 4E binding protein 1         | <i>EIF4EBP1</i>  |
| 5996  | 92,7     | 136     | -1,46 | 0,04875 | 0,444 | 209380_s_at  | ATP-binding cassette, sub-family C (CFTR/MRP), member 5               | <i>ABCC5</i>     |
| 1499  | 65,1     | 95,1    | -1,46 | 0,00923 | 0,336 | 229050_s_at  | Small nucleolar RNA host gene (non-protein coding) 7                  | <i>SNHG7</i>     |
| 1223  | 14,2     | 20,7    | -1,46 | 0,00728 | 0,324 | 204126_s_at  | CDC45 cell division cycle 45-like (S. cerevisiae)                     | <i>CDC45L</i>    |
| 372   | 130      | 189     | -1,46 | 0,00195 | 0,284 | 233746_x_at  | Huntingtin interacting protein K                                      | <i>HYPK</i>      |
| 3404  | 6,62     | 9,64    | -1,46 | 0,02428 | 0,390 | 1562904_s_at | Similar to CG7889-PA                                                  | <i>FLJ10661</i>  |
| 2242  | 184      | 268     | -1,46 | 0,01489 | 0,363 | 201433_s_at  | Phosphatidylserine synthase 1                                         | <i>PTDSS1</i>    |
| 3183  | 6,40     | 9,30    | -1,45 | 0,02256 | 0,387 | 210341_at    | Myelin transcription factor 1                                         | <i>MYT1</i>      |
| 4533  | 16,4     | 23,9    | -1,45 | 0,03425 | 0,412 | 213599_at    | Opa interacting protein 5                                             | <i>OIP5</i>      |
| 2107  | 17,0     | 24,7    | -1,45 | 0,01383 | 0,358 | 40020_at     | Cadherin, EGF LAG seven-pass G-type receptor 3                        | <i>CELSR3</i>    |
| 4680  | 18,3     | 26,6    | -1,45 | 0,03534 | 0,413 | 1552623_at   | Hematopoietic SH2 domain containing                                   | <i>HSH2D</i>     |
| 1782  | 27,6     | 40,0    | -1,45 | 0,01137 | 0,349 | 228357_at    | Unkempt homolog (Drosophila)                                          | <i>UNK</i>       |
| 4830  | 62,2     | 89,9    | -1,45 | 0,03679 | 0,416 | 201801_s_at  | Solute carrier family 29, member 1                                    | <i>SLC29A1</i>   |
| 2578  | 31,1     | 45,0    | -1,45 | 0,01749 | 0,371 | 206574_s_at  | Protein tyrosine phosphatase type IVA, member 3                       | <i>PTP4A3</i>    |
| 5119  | 34,1     | 49,3    | -1,45 | 0,03941 | 0,421 | 204092_s_at  | Aurora kinase A                                                       | <i>AURKA</i>     |
| 597   | 36,6     | 52,9    | -1,44 | 0,00329 | 0,301 | 215030_at    | G-rich RNA sequence binding factor 1                                  | <i>GRSF1</i>     |
| 734   | 58,6     | 84,7    | -1,44 | 0,00419 | 0,308 | 215905_s_at  | WD repeat domain 57                                                   | <i>WDR57</i>     |

| Index | Mutated* | Normal* | FC    | P value | FDR** | Probe set    | Description                                                      | Gene symbol      |
|-------|----------|---------|-------|---------|-------|--------------|------------------------------------------------------------------|------------------|
| 1246  | 25,7     | 37,2    | -1,44 | 0,00740 | 0,324 | 205870_at    | Bradykinin receptor B2                                           | <i>BDKRB2</i>    |
| 1875  | 12,1     | 17,5    | -1,44 | 0,01213 | 0,354 | 230454_at    | Islet cell autoantigen 1,69kDa-like                              | <i>ICA1L</i>     |
| 1554  | 37,1     | 53,5    | -1,44 | 0,00959 | 0,337 | 227787_s_at  | Mediator complex subunit 30                                      | <i>MED30</i>     |
| 1333  | 140      | 202     | -1,44 | 0,00801 | 0,328 | 202433_at    | Solute carrier family 35, member B1                              | <i>SLC35B1</i>   |
| 2791  | 43,3     | 62,5    | -1,44 | 0,01941 | 0,380 | 202219_at    | Solute carrier family 6, member 8                                | <i>SLC6A8</i>    |
| 2395  | 57,3     | 82,7    | -1,44 | 0,01599 | 0,365 | 212983_at    | v-HA-RAS Harvey rat sarcoma viral oncogene homolog               | <i>HRAS</i>      |
| 960   | 22,4     | 32,4    | -1,44 | 0,00554 | 0,315 | 218832_x_at  | Arrestin, beta 1                                                 | <i>ARRB1</i>     |
| 1272  | 176      | 254     | -1,44 | 0,00756 | 0,325 | 218049_s_at  | Mitochondrial ribosomal protein L13                              | <i>MRPL13</i>    |
| 533   | 158      | 227     | -1,44 | 0,00285 | 0,292 | 219449_s_at  | Transmembrane protein 70                                         | <i>TMEM70</i>    |
| 3565  | 4,68     | 6,75    | -1,44 | 0,02574 | 0,394 | 1553175_s_at | Phosphodiesterase 5A, cGMP-specific                              | <i>PDE5A</i>     |
| 3125  | 26,4     | 38,1    | -1,44 | 0,02214 | 0,387 | 226446_at    | Hairy and enhancer of split 6 (Drosophila)                       | <i>HES6</i>      |
| 2369  | 16,6     | 23,8    | -1,44 | 0,01580 | 0,364 | 209753_s_at  | Thymopoietin                                                     | <i>TMPO</i>      |
| 1544  | 209      | 301     | -1,44 | 0,00954 | 0,337 | 200661_at    | Cathepsin A                                                      | <i>CTSA</i>      |
| 818   | 87,4     | 126     | -1,44 | 0,00467 | 0,312 | 225723_at    | Chromosome 6 open reading frame 129                              | <i>C6orf129</i>  |
| 6001  | 8,26     | 11,9    | -1,44 | 0,04877 | 0,444 | 205692_s_at  | CD38 molecule                                                    | <i>CD38</i>      |
| 3710  | 111      | 160     | -1,44 | 0,02684 | 0,396 | 223922_x_at  | Membrane-spanning 4-domains, subfamily A, member 6A              | <i>MS4A6A</i>    |
| 169   | 17,9     | 25,7    | -1,44 | 0,00078 | 0,244 | 235689_at    | Mitochondrial methionyl-tRNA formyltransferase                   | <i>MTFMT</i>     |
| 6036  | 4,37     | 6,28    | -1,44 | 0,04915 | 0,445 | 241412_at    | Betacellulin                                                     | <i>BTC</i>       |
| 3896  | 67,2     | 96,4    | -1,44 | 0,02846 | 0,399 | 1558703_at   | Solute carrier family 46, member 1                               | <i>SLC46A1</i>   |
| 2546  | 161      | 231     | -1,43 | 0,01720 | 0,369 | 226223_at    | Transcribed locus                                                | -                |
| 4549  | 69,1     | 99,0    | -1,43 | 0,03439 | 0,412 | 209849_s_at  | RAD51 homolog C (S. cerevisiae)                                  | <i>RAD51C</i>    |
| 784   | 90,7     | 130     | -1,43 | 0,00449 | 0,311 | 221020_s_at  | Solute carrier family 25, member 32                              | <i>SLC25A32</i>  |
| 1856  | 164      | 235     | -1,43 | 0,01195 | 0,352 | 223156_at    | Mitochondrial ribosomal protein S23                              | <i>MRPS23</i>    |
| 2889  | 10,1     | 14,4    | -1,43 | 0,02027 | 0,383 | 215731_s_at  | M-phase phosphoprotein 9                                         | <i>MPHOSPH9</i>  |
| 234   | 18,8     | 26,9    | -1,43 | 0,00108 | 0,250 | 235015_at    | Placenta Cot 25-normalized                                       | -                |
| 3818  | 25,2     | 35,9    | -1,42 | 0,02786 | 0,399 | 227936_at    | Transmembrane protein 68                                         | <i>TMEM68</i>    |
| 4759  | 62,0     | 88,2    | -1,42 | 0,03608 | 0,414 | 225436_at    | Family with sequence similarity 108, member C1                   | <i>FAM108C1</i>  |
| 4063  | 20,4     | 29,0    | -1,42 | 0,02980 | 0,401 | 219000_s_at  | Defective in sister chromatid cohesion homolog 1 (S. cerevisiae) | <i>DCC1</i>      |
| 1252  | 4,20     | 5,98    | -1,42 | 0,00746 | 0,325 | 238566_at    | Transcribed locus                                                | -                |
| 746   | 83,7     | 119     | -1,42 | 0,00423 | 0,308 | 202204_s_at  | Autocrine motility factor receptor                               | <i>AMFR</i>      |
| 2005  | 34,8     | 49,4    | -1,42 | 0,01308 | 0,355 | 221520_s_at  | Cell division cycle associated 8                                 | <i>CDCA8</i>     |
| 1912  | 52,3     | 74,3    | -1,42 | 0,01244 | 0,355 | 202070_s_at  | Isocitrate dehydrogenase 3 (NAD+) alpha                          | <i>IDH3A</i>     |
| 4523  | 80,3     | 114     | -1,42 | 0,03413 | 0,412 | 226319_s_at  | THO complex 4                                                    | <i>THOC4</i>     |
| 1190  | 118      | 167     | -1,42 | 0,00703 | 0,322 | 212056_at    | KIAA0182 protein                                                 | <i>KIAA0182</i>  |
| 5276  | 108      | 153     | -1,42 | 0,04100 | 0,425 | 218187_s_at  | Chromosome 8 open reading frame 33                               | <i>C8orf33</i>   |
| 771   | 154      | 218     | -1,42 | 0,00442 | 0,311 | 224281_s_at  | Neugrin, neurite outgrowth associated                            | <i>NGRN</i>      |
| 2241  | 113      | 160     | -1,41 | 0,01489 | 0,363 | 218695_at    | Exosome component 4                                              | <i>EXOSC4</i>    |
| 230   | 48,1     | 68,1    | -1,41 | 0,00106 | 0,250 | 218906_x_at  | Kinesin light chain 2                                            | <i>KLC2</i>      |
| 5714  | 180      | 255     | -1,41 | 0,04574 | 0,438 | 201483_s_at  | Suppressor of Ty 4 homolog 1 (S. cerevisiae)                     | <i>SUPT4H1</i>   |
| 4461  | 88,3     | 125     | -1,41 | 0,03352 | 0,411 | 225374_at    | Chromosome 17 open reading frame 32                              | <i>C17orf32</i>  |
| 900   | 19,1     | 26,9    | -1,41 | 0,00521 | 0,313 | 1568596_a_at | Trophinin associated protein (tastin)                            | <i>TROAP</i>     |
| 4183  | 10,6     | 14,9    | -1,41 | 0,03092 | 0,404 | 209924_at    | Chemokine (C-C motif) ligand 18                                  | <i>CCL18</i>     |
| 4385  | 31,3     | 44,1    | -1,41 | 0,03267 | 0,407 | 214542_x_at  | Histone cluster 1, H2ai                                          | <i>HIST1H2AI</i> |
| 1211  | 14,4     | 20,2    | -1,41 | 0,00718 | 0,324 | 239699_s_at  | Postmeiotic segregation increased 2-like 1                       | <i>PMS2L1</i>    |
| 853   | 13,7     | 19,2    | -1,41 | 0,00491 | 0,313 | 222276_at    | Transcribed locus                                                | -                |
| 3393  | 335      | 471     | -1,41 | 0,02419 | 0,390 | 208808_s_at  | High-mobility group box 2                                        | <i>HMGB2</i>     |
| 3930  | 15,6     | 21,9    | -1,40 | 0,02873 | 0,399 | 206753_at    | Retinol dehydrogenase 16 (all-trans)                             | <i>RDH16</i>     |
| 5129  | 7,00     | 9,83    | -1,40 | 0,03946 | 0,421 | 1555216_a_at | Hypothetical LOC645722                                           | <i>LOC645722</i> |
| 3805  | 5,85     | 8,21    | -1,40 | 0,02771 | 0,398 | 32128_at     | Chemokine (C-C motif) ligand 18                                  | <i>CCL18</i>     |
| 547   | 517      | 726     | -1,40 | 0,00296 | 0,295 | 223880_x_at  | Chromosome 20 open reading frame 24                              | <i>C20orf24</i>  |
| 2822  | 35,2     | 49,4    | -1,40 | 0,01970 | 0,381 | 218045_x_at  | Parathyrosin                                                     | <i>PTMS</i>      |
| 1003  | 391      | 548     | -1,40 | 0,00580 | 0,316 | 200078_s_at  | ATPase, H+ transporting, lysosomal 21kDa, V0 subunit b           | <i>ATP6V0B</i>   |
| 2470  | 49,2     | 69,0    | -1,40 | 0,01659 | 0,367 | 200676_s_at  | Ubiquitin-conjugating enzyme E2L 3                               | <i>UBE2L3</i>    |
| 4402  | 18,8     | 26,3    | -1,40 | 0,03285 | 0,408 | 219751_at    | SET domain containing 6                                          | <i>SETD6</i>     |
| 671   | 15,6     | 21,8    | -1,40 | 0,00386 | 0,308 | 1553043_a_at | CD300 molecule-like family member f                              | <i>CD300LF</i>   |
| 812   | 28,0     | 39,2    | -1,40 | 0,00462 | 0,311 | 224980_at    | LEM domain containing 2                                          | <i>LEMD2</i>     |
| 3715  | 6,82     | 9,55    | -1,40 | 0,02694 | 0,396 | 204534_at    | Vitronectin                                                      | <i>VTN</i>       |

| Index | Mutated* | Normal* | FC    | P value | FDR** | Probe set    | Description                                                 | Gene symbol       |
|-------|----------|---------|-------|---------|-------|--------------|-------------------------------------------------------------|-------------------|
| 1348  | 33,3     | 46,6    | -1,40 | 0,00809 | 0,328 | 205695_at    | Serine dehydratase                                          | <i>SDS</i>        |
| 1715  | 12,4     | 17,3    | -1,40 | 0,01099 | 0,348 | 238780_s_at  | cDNA DKFZp779F2345                                          | -                 |
| 2106  | 5,76     | 8,04    | -1,40 | 0,01379 | 0,358 | 207746_at    | Polymerase (DNA directed), theta                            | <i>POLQ</i>       |
| 4339  | 20,9     | 29,2    | -1,39 | 0,03231 | 0,407 | 218521_s_at  | Ubiquitin-conjugating enzyme E2W                            | <i>UBE2W</i>      |
| 4054  | 82,3     | 115     | -1,39 | 0,02974 | 0,401 | 203790_s_at  | Heat-responsive protein 12                                  | <i>HRSP12</i>     |
| 2953  | 10,8     | 15,0    | -1,39 | 0,02073 | 0,384 | 223845_at    | Hypothetical protein BC001437                               | <i>LOC144305</i>  |
| 3448  | 9,48     | 13,2    | -1,39 | 0,02469 | 0,391 | 1557147_a_at | Full length insert cDNA YH73H08                             | -                 |
| 779   | 113      | 157     | -1,39 | 0,00447 | 0,311 | 203109_at    | Ubiquitin-conjugating enzyme E2M                            | <i>UBE2M</i>      |
| 4961  | 47,7     | 66,5    | -1,39 | 0,03805 | 0,419 | 209408_at    | Kinesin family member 2C                                    | <i>KIF2C</i>      |
| 3037  | 6,19     | 8,62    | -1,39 | 0,02140 | 0,385 | 1554020_at   | Bicaudal D homolog 1 (Drosophila)                           | <i>BICD1</i>      |
| 2069  | 5,06     | 7,03    | -1,39 | 0,01353 | 0,356 | 214874_at    | Plakophilin 4                                               | <i>PKP4</i>       |
| 813   | 21,8     | 30,2    | -1,39 | 0,00465 | 0,312 | 215728_s_at  | Acyl-CoA thioesterase 7                                     | <i>ACOT7</i>      |
| 6034  | 5,34     | 7,41    | -1,39 | 0,04911 | 0,445 | 220484_at    | Mucolipin 3                                                 | <i>MCOLN3</i>     |
| 4409  | 28,9     | 40,1    | -1,39 | 0,03292 | 0,408 | 201710_at    | v-Myb myeloblastosis viral oncogene homolog (avian)-like 2  | <i>MYBL2</i>      |
| 4546  | 62,4     | 86,5    | -1,39 | 0,03436 | 0,412 | 202392_s_at  | Phosphatidylserine decarboxylase                            | <i>PISD</i>       |
| 3150  | 174      | 241     | -1,39 | 0,02235 | 0,387 | 221504_s_at  | ATPase, H+ transporting, lysosomal 50/57kDa, V1 subunit H   | <i>ATP6V1H</i>    |
| 2467  | 466      | 645     | -1,39 | 0,01658 | 0,367 | 202824_s_at  | Transcription elongation factor B (SIII), polypeptide 1     | <i>TCEB1</i>      |
| 2367  | 84,4     | 117     | -1,39 | 0,01579 | 0,364 | 226805_at    | Chromosome 20 open reading frame 142                        | <i>C20orf142</i>  |
| 345   | 241      | 333     | -1,39 | 0,00177 | 0,278 | 227291_s_at  | BolA homolog 3 (E. coli)                                    | <i>BOLA3</i>      |
| 4587  | 13,4     | 18,6    | -1,38 | 0,03469 | 0,412 | 221638_s_at  | Syntaxin 16                                                 | <i>STX16</i>      |
| 3704  | 4,23     | 5,85    | -1,38 | 0,02679 | 0,395 | 233446_at    | One cut homeobox 2                                          | <i>ONECUT2</i>    |
| 4176  | 20,9     | 29,0    | -1,38 | 0,03086 | 0,404 | 231952_at    | Hypothetical protein LOC731450                              | <i>LOC731450</i>  |
| 3116  | 16,7     | 23,0    | -1,38 | 0,02203 | 0,387 | 238728_at    | Similar to KIAA0825 protein                                 | -                 |
| 4955  | 14,5     | 20,0    | -1,38 | 0,03801 | 0,419 | 235006_at    | CDKN2A interacting protein N-terminal like                  | <i>CDKN2AIPNL</i> |
| 379   | 64,2     | 88,6    | -1,38 | 0,00198 | 0,284 | 218647_s_at  | YrdC domain containing (E. coli)                            | <i>YRDC</i>       |
| 292   | 11,0     | 15,2    | -1,38 | 0,00143 | 0,263 | 209544_at    | Receptor-interacting serine-threonine kinase 2              | <i>RIPK2</i>      |
| 2472  | 19,9     | 27,4    | -1,38 | 0,01661 | 0,367 | 221965_at    | M-phase phosphoprotein 9                                    | <i>MPHOSPH9</i>   |
| 3159  | 123      | 170     | -1,38 | 0,02242 | 0,387 | 202353_s_at  | Proteasome (prosome, macropain) 26S subunit, non-ATPase, 12 | <i>PSMD12</i>     |
| 937   | 4,19     | 5,78    | -1,38 | 0,00537 | 0,313 | 226462_at    | Syntaxin binding protein 6 (amisyn)                         | <i>STXBPG</i>     |
| 350   | 60,7     | 83,6    | -1,38 | 0,00179 | 0,278 | 219675_s_at  | UDP-glucuronate decarboxylase 1                             | <i>UXS1</i>       |
| 4516  | 129      | 178     | -1,38 | 0,03404 | 0,412 | 201266_at    | Thioredoxin reductase 1                                     | <i>TXNRD1</i>     |
| 2066  | 62,3     | 85,8    | -1,38 | 0,01349 | 0,356 | 232662_x_at  | Chromosome 10 open reading frame 58                         | <i>C10orf58</i>   |
| 6041  | 97,1     | 134     | -1,38 | 0,04919 | 0,445 | 225355_at    | cDNA DKFZP761M1511                                          | -                 |
| 2957  | 183      | 251     | -1,37 | 0,02076 | 0,384 | 204426_at    | Transmembrane emp24 domain trafficking protein 2            | <i>TMED2</i>      |
| 4670  | 225      | 309     | -1,37 | 0,03526 | 0,413 | 209517_s_at  | Ash2 (absent, small, or homeotic)-like (Drosophila)         | <i>ASH2L</i>      |
| 3296  | 1244     | 1709    | -1,37 | 0,02349 | 0,388 | 200799_at    | Heat shock 70kDa protein 1A                                 | <i>HSPA1A</i>     |
| 2910  | 26,5     | 36,4    | -1,37 | 0,02045 | 0,383 | 225747_at    | Coenzyme Q10 homolog A (S. cerevisiae)                      | <i>COQ10A</i>     |
| 5005  | 8,83     | 12,1    | -1,37 | 0,03844 | 0,420 | 222376_at    | Transcribed locus                                           | -                 |
| 887   | 559      | 767     | -1,37 | 0,00512 | 0,313 | 217835_x_at  | Chromosome 20 open reading frame 24                         | <i>C20orf24</i>   |
| 3062  | 170      | 234     | -1,37 | 0,02157 | 0,385 | 224743_at    | Inositol monophosphatase domain containing 1                | <i>IMPAD1</i>     |
| 5761  | 19,1     | 26,3    | -1,37 | 0,04629 | 0,439 | 229106_at    | Dynein, light chain, LC8-type 2                             | <i>DYNLL2</i>     |
| 213   | 6,72     | 9,22    | -1,37 | 0,00096 | 0,244 | 236478_at    | Interferon (alpha, beta and omega) receptor 1               | <i>IFNAR1</i>     |
| 644   | 19,7     | 27,1    | -1,37 | 0,00367 | 0,308 | 228627_at    | Tousled-like kinase 2                                       | <i>TLK2</i>       |
| 4317  | 11,1     | 15,3    | -1,37 | 0,03215 | 0,407 | 230591_at    | Hypothetical protein LOC729887                              | <i>LOC729887</i>  |
| 2703  | 115      | 158     | -1,37 | 0,01854 | 0,375 | 58696_at     | Exosome component 4                                         | <i>EXOSC4</i>     |
| 3354  | 50,7     | 69,5    | -1,37 | 0,02382 | 0,388 | 209065_at    | Ubiquinol-cytochrome c reductase binding protein            | <i>UQCRB</i>      |
| 4730  | 194      | 265     | -1,37 | 0,03582 | 0,414 | 225676_s_at  | WD repeats and SOF1 domain containing                       | <i>WDSOF1</i>     |
| 1813  | 304      | 416     | -1,37 | 0,01169 | 0,351 | 224603_at    | cDNA clone IMAGE:3831740                                    | -                 |
| 3677  | 172      | 236     | -1,37 | 0,02657 | 0,395 | 210296_s_at  | Peroxisomal membrane protein 3, 35kDa                       | <i>PXMP3</i>      |
| 3938  | 155      | 212     | -1,37 | 0,02876 | 0,399 | 201584_s_at  | DEAD (Asp-Glu-Ala-Asp) box polypeptide 39                   | <i>DDX39</i>      |
| 5579  | 10,3     | 14,1    | -1,37 | 0,04449 | 0,436 | 1558906_a_at | cDNA clone IMAGE:5265020                                    | -                 |
| 2587  | 12,0     | 16,4    | -1,37 | 0,01755 | 0,371 | 206109_at    | Fucosyltransferase 1                                        | <i>FUT1</i>       |
| 3902  | 9,30     | 12,7    | -1,37 | 0,02851 | 0,399 | 212427_at    | KIAA0368 protein                                            | <i>KIAA0368</i>   |
| 2878  | 61,0     | 83,4    | -1,37 | 0,02020 | 0,383 | 218923_at    | Chitinase, di-N-acetyl-                                     | <i>CTBS</i>       |
| 2753  | 4,56     | 6,23    | -1,37 | 0,01905 | 0,378 | 237246_at    | Transcribed locus                                           | -                 |
| 5515  | 53,2     | 72,8    | -1,37 | 0,04371 | 0,433 | 229444_at    | Hypothetical protein LOC729776                              | <i>LOC729776</i>  |
| 1266  | 355      | 486     | -1,37 | 0,00753 | 0,325 | 224376_s_at  | Chromosome 20 open reading frame 24                         | <i>C20orf24</i>   |

| Index | Mutated* | Normal* | FC    | P value | FDR** | Probe set    | Description                                                 | Gene symbol |
|-------|----------|---------|-------|---------|-------|--------------|-------------------------------------------------------------|-------------|
| 5619  | 200      | 273     | -1,37 | 0,04484 | 0,436 | 228123_s_at  | Abhydrolase domain containing 12                            | ABHD12      |
| 5643  | 11,2     | 15,3    | -1,36 | 0,04502 | 0,436 | 216985_s_at  | Syntaxin 3                                                  | STX3        |
| 5240  | 30,1     | 41,0    | -1,36 | 0,04059 | 0,423 | 220488_s_at  | Breast carcinoma amplified sequence 3                       | BCAS3       |
| 3240  | 12,0     | 16,4    | -1,36 | 0,02299 | 0,388 | 220233_at    | F-box protein 17                                            | FBXO17      |
| 5945  | 25,6     | 34,9    | -1,36 | 0,04817 | 0,443 | 227037_at    | Similar to CG12314 gene product                             | LOC201164   |
| 711   | 393      | 535     | -1,36 | 0,00408 | 0,308 | 201923_at    | Peroxiredoxin 4                                             | PRDX4       |
| 4206  | 25,0     | 34,1    | -1,36 | 0,03110 | 0,404 | 228517_at    | Chromosome 1 open reading frame 149                         | C1orf149    |
| 4672  | 13,6     | 18,6    | -1,36 | 0,03529 | 0,413 | 208033_s_at  | Zinc finger homeobox 3                                      | ZFHX3       |
| 4717  | 7,75     | 10,6    | -1,36 | 0,03569 | 0,413 | 209535_s_at  | -                                                           | -           |
| 3388  | 251      | 342     | -1,36 | 0,02414 | 0,389 | 203880_at    | COX17 cytochrome c oxidase assembly homolog (S. cerevisiae) | COX17       |
| 4625  | 15,2     | 20,7    | -1,36 | 0,03489 | 0,412 | 202094_at    | Baculoviral IAP repeat-containing 5 (survivin)              | BIRC5       |
| 1256  | 18,7     | 25,5    | -1,36 | 0,00748 | 0,325 | 227245_at    | Chromosome 12 open reading frame 30                         | C12orf30    |
| 4806  | 97,0     | 132     | -1,36 | 0,03648 | 0,415 | 222673_x_at  | Transmembrane protein 57                                    | TMEM57      |
| 5502  | 7,43     | 10,1    | -1,36 | 0,04357 | 0,433 | 238214_at    | Solute carrier family 26, member 7                          | SLC26A7     |
| 4511  | 38,4     | 52,2    | -1,36 | 0,03401 | 0,412 | 216125_s_at  | RAN binding protein 9                                       | RANBP9      |
| 2285  | 48,0     | 65,3    | -1,36 | 0,01519 | 0,363 | 218805_at    | GTPase, IMAP family member 5                                | GIMAP5      |
| 6007  | 125      | 171     | -1,36 | 0,04882 | 0,444 | 218831_s_at  | Fc fragment of IgG, receptor, transporter, alpha            | FCGR1       |
| 3038  | 35,1     | 47,7    | -1,36 | 0,02140 | 0,385 | 217191_x_at  | -                                                           | -           |
| 172   | 9,67     | 13,2    | -1,36 | 0,00080 | 0,244 | 239067_s_at  | Pannexin 2                                                  | PANX2       |
| 2864  | 34,4     | 46,8    | -1,36 | 0,02011 | 0,383 | 222665_at    | Family with sequence similarity 82, member B                | FAM82B      |
| 2296  | 38,9     | 52,8    | -1,36 | 0,01527 | 0,363 | 209695_at    | Protein tyrosine phosphatase type IVA, member 3             | PTP4A3      |
| 1607  | 241      | 327     | -1,36 | 0,01006 | 0,342 | 219402_s_at  | Der1-like domain family, member 1                           | DERL1       |
| 3606  | 194      | 263     | -1,36 | 0,02600 | 0,394 | 224601_at    | cDNA clone IMAGE:3831740                                    | -           |
| 4359  | 63,6     | 86,4    | -1,36 | 0,03242 | 0,407 | 226287_at    | Coiled-coil domain containing 34                            | CCDC34      |
| 1561  | 224      | 304     | -1,36 | 0,00968 | 0,339 | 217956_s_at  | Enolase-phosphatase 1                                       | ENOPH1      |
| 1465  | 251      | 341     | -1,36 | 0,00897 | 0,334 | 218165_at    | Chromosome 1 open reading frame 149                         | C1orf149    |
| 1537  | 6,94     | 9,42    | -1,36 | 0,00952 | 0,337 | 205262_at    | Potassium voltage-gated channel subfamily H member 2        | KCNH2       |
| 5799  | 507      | 687     | -1,36 | 0,04677 | 0,441 | 201577_at    | Non-metastatic cells 1, protein (NM23A) expressed in        | NME1        |
| 466   | 24,3     | 33,0    | -1,36 | 0,00246 | 0,288 | 204817_at    | Extra spindle pole bodies homolog 1 (S. cerevisiae)         | ESPL1       |
| 4373  | 119      | 162     | -1,36 | 0,03252 | 0,407 | 209567_at    | RRS1 ribosome biogenesis regulator homolog (S. cerevisiae)  | RRS1        |
| 2245  | 66,8     | 90,4    | -1,35 | 0,01493 | 0,363 | 227696_at    | Exosome component 6                                         | EXOSC6      |
| 1990  | 7,42     | 10,0    | -1,35 | 0,01302 | 0,355 | 1560620_at   | Potassium channel, subfamily K, member 15                   | KCNK15      |
| 6103  | 5,74     | 7,77    | -1,35 | 0,04983 | 0,446 | 222773_s_at  | UDP-GalNAc:polypeptide N-acetylgalactosaminyltransferase 12 | GALNT12     |
| 2222  | 21,4     | 29,0    | -1,35 | 0,01476 | 0,363 | 204629_at    | Parvin, beta                                                | PARVB       |
| 4011  | 107      | 144     | -1,35 | 0,02937 | 0,400 | 218447_at    | Chromosome 16 open reading frame 61                         | C16orf61    |
| 3860  | 38,6     | 52,2    | -1,35 | 0,02819 | 0,399 | 227605_at    | Transcribed locus                                           | -           |
| 266   | 23,7     | 32,0    | -1,35 | 0,00126 | 0,260 | 229321_s_at  | cDNA FLJ35002 fis, clone OCBBF2011914                       | -           |
| 4693  | 17,2     | 23,3    | -1,35 | 0,03545 | 0,413 | 222218_s_at  | Paired immunoglobulin-like type 2 receptor alpha            | PILRA       |
| 766   | 47,0     | 63,5    | -1,35 | 0,00434 | 0,310 | 1558044_s_at | Exosome component 6                                         | EXOSC6      |
| 831   | 37,2     | 50,2    | -1,35 | 0,00475 | 0,312 | 222703_s_at  | YrdC domain containing (E. coli)                            | YRDC        |
| 2050  | 52,0     | 70,2    | -1,35 | 0,01332 | 0,355 | 218455_at    | NFS1 nitrogen fixation 1 homolog (S. cerevisiae)            | NFS1        |
| 2912  | 5,28     | 7,13    | -1,35 | 0,02045 | 0,383 | 220310_at    | Tubulin, alpha-like 3                                       | TUBAL3      |
| 405   | 16,5     | 22,3    | -1,35 | 0,00213 | 0,286 | 223628_at    | Transmembrane protein 191A                                  | TMEM191A    |
| 305   | 7,76     | 10,5    | -1,35 | 0,00147 | 0,263 | 1563445_x_at | Cathepsin L-like 3                                          | CTSLL3      |
| 386   | 5,23     | 7,06    | -1,35 | 0,00201 | 0,284 | 227491_at    | cDNA FLJ22539 fis, clone HRC13227                           | -           |
| 3191  | 288      | 389     | -1,35 | 0,02262 | 0,387 | 219549_s_at  | Reticulon 3                                                 | RTN3        |
| 1401  | 51,9     | 70,0    | -1,35 | 0,00847 | 0,330 | 209383_at    | DNA-damage-inducible transcript 3                           | DDIT3       |
| 1968  | 90,7     | 122     | -1,35 | 0,01286 | 0,355 | 203931_s_at  | Mitochondrial ribosomal protein L12                         | MRPL12      |
| 5341  | 71,9     | 97,0    | -1,35 | 0,04184 | 0,428 | 226413_at    | Hypothetical gene supported by BC047417                     | LOC400027   |
| 1505  | 41,4     | 55,8    | -1,35 | 0,00925 | 0,336 | 218308_at    | Transforming, acidic coiled-coil containing protein 3       | TACC3       |
| 2946  | 118      | 159     | -1,35 | 0,02065 | 0,383 | 213553_x_at  | Apolipoprotein C-I                                          | APOC1       |
| 5332  | 47,5     | 64,0    | -1,35 | 0,04174 | 0,428 | 218951_s_at  | PI-PLC X domain-containing protein 1                        | PLCXD1      |
| 5500  | 11,9     | 16,1    | -1,35 | 0,04354 | 0,433 | 223874_at    | Actin-related Arp11                                         | ARP11       |
| 1035  | 15,4     | 20,7    | -1,35 | 0,00601 | 0,318 | 211825_s_at  | Ewing sarcoma breakpoint region 1                           | EWSR1       |
| 1084  | 127      | 170     | -1,35 | 0,00634 | 0,319 | 229742_at    | Hypothetical LOC145853                                      | LOC145853   |
| 2020  | 174      | 234     | -1,35 | 0,01317 | 0,355 | 218074_at    | Family with sequence similarity 96, member B                | FAM96B      |
| 5904  | 4,64     | 6,24    | -1,35 | 0,04784 | 0,443 | 1554614_a_at | Polypyrimidine tract binding protein 2                      | PTBP2       |

| Index | Mutated* | Normal* | FC    | P value | FDR** | Probe set    | Description                                                            | Gene symbol |
|-------|----------|---------|-------|---------|-------|--------------|------------------------------------------------------------------------|-------------|
| 293   | 13,1     | 17,6    | -1,35 | 0,00144 | 0,263 | 1555943_at   | Phosphoglycerate mutase family member 5                                | PGAM5       |
| 4965  | 7,71     | 10,4    | -1,35 | 0,03810 | 0,419 | 242473_at    | TNF receptor-associated factor 4                                       | TRAF4       |
| 752   | 25,5     | 34,3    | -1,35 | 0,00425 | 0,308 | 225233_at    | Musashi homolog 2 (Drosophila)                                         | MSI2        |
| 5228  | 19,9     | 26,8    | -1,35 | 0,04045 | 0,423 | 203713_s_at  | Lethal giant larvae homolog 2 (Drosophila)                             | LLGL2       |
| 3127  | 327      | 440     | -1,34 | 0,02217 | 0,387 | 208836_at    | ATPase, Na+/K+ transporting, beta 3 polypeptide                        | ATP1B3      |
| 476   | 11,8     | 15,8    | -1,34 | 0,00255 | 0,289 | 238802_at    | Trypsin domain containing 1                                            | TYSND1      |
| 2314  | 98,6     | 132     | -1,34 | 0,01537 | 0,363 | 200684_s_at  | Ubiquitin-conjugating enzyme E2L 3                                     | UBE2L3      |
| 3877  | 325      | 437     | -1,34 | 0,02832 | 0,399 | 200708_at    | Glutamic-oxaloacetic transaminase 2, mitochondrial                     | GOT2        |
| 1260  | 80,5     | 108     | -1,34 | 0,00750 | 0,325 | 216977_x_at  | Small nuclear ribonucleoprotein polypeptide A'                         | SNRPA1      |
| 3610  | 41,8     | 56,1    | -1,34 | 0,02606 | 0,394 | 202039_at    | TGFB1-induced anti-apoptotic factor 1                                  | TIAF1       |
| 1529  | 13,5     | 18,1    | -1,34 | 0,00947 | 0,337 | 244721_at    | Tumor protein p53 inducible nuclear protein 1                          | TP53INP1    |
| 2123  | 29,4     | 39,4    | -1,34 | 0,01398 | 0,359 | 38158_at     | Extra spindle pole bodies homolog 1 (S. cerevisiae)                    | ESPL1       |
| 384   | 28,7     | 38,5    | -1,34 | 0,00200 | 0,284 | 228064_at    | Chromosome 22 open reading frame 36                                    | C22orf36    |
| 5530  | 88,3     | 118     | -1,34 | 0,04389 | 0,434 | 202583_s_at  | RAN binding protein 9                                                  | RANBP9      |
| 5671  | 37,0     | 49,5    | -1,34 | 0,04525 | 0,436 | 224753_at    | Cell division cycle associated 5                                       | CDCA5       |
| 5818  | 20,4     | 27,3    | -1,34 | 0,04703 | 0,442 | 222756_s_at  | Arrestin, beta 1                                                       | ARRB1       |
| 5521  | 45,0     | 60,2    | -1,34 | 0,04380 | 0,433 | 219517_at    | Elongation factor RNA polymerase II-like 3                             | ELL3        |
| 5205  | 15,2     | 20,3    | -1,34 | 0,04017 | 0,422 | 1557626_at   | cDNA FLJ39805 fis, clone SPLEN2007951                                  | -           |
| 1144  | 5,97     | 7,98    | -1,34 | 0,00670 | 0,320 | 206486_at    | Lymphocyte-activation gene 3                                           | LAG3        |
| 2455  | 143      | 192     | -1,34 | 0,01646 | 0,366 | 224739_at    | Pim-3 oncogene                                                         | PIM3        |
| 4332  | 6,90     | 9,22    | -1,34 | 0,03225 | 0,407 | 238114_at    | Protein-L-isoaspartate O-methyltransferase domain-containing protein 1 | PCMTD1      |
| 25    | 9,20     | 12,3    | -1,34 | 0,00011 | 0,201 | 238554_at    | Cytochrome b5 type B (outer mitochondrial membrane)                    | CYB5B       |
| 70    | 22,6     | 30,2    | -1,34 | 0,00027 | 0,201 | 213072_at    | Cysteine/histidine-rich 1                                              | CYHR1       |
| 2201  | 32,3     | 43,2    | -1,34 | 0,01456 | 0,361 | 224462_s_at  | Coiled-coil-helix-Coiled-coil-helix domain containing 6                | CHCHD6      |
| 2828  | 186      | 248     | -1,34 | 0,01973 | 0,381 | 211985_s_at  | Calmodulin 1 (phosphorylase kinase, delta)                             | CALM1       |
| 693   | 6,09     | 8,13    | -1,34 | 0,00399 | 0,308 | 229685_at    | cDNA clone IMAGE:5263734                                               | -           |
| 2550  | 4,95     | 6,61    | -1,34 | 0,01726 | 0,370 | 228826_at    | Clone IMAGE:5215917, mRNA                                              | -           |
| 1094  | 332      | 443     | -1,34 | 0,00641 | 0,319 | 223020_at    | CLPTM1-like                                                            | CLPTM1L     |
| 264   | 159      | 212     | -1,33 | 0,00126 | 0,260 | 201174_s_at  | Telomeric repeat binding factor 2, interacting protein                 | TERF2IP     |
| 1781  | 41,8     | 55,8    | -1,33 | 0,01137 | 0,349 | 214848_at    | Clone 23548 mRNA sequence                                              | -           |
| 3290  | 72,2     | 96,4    | -1,33 | 0,02344 | 0,388 | 228787_s_at  | Breast carcinoma amplified sequence 4                                  | BCAS4       |
| 4960  | 5,19     | 6,92    | -1,33 | 0,03805 | 0,419 | 1552546_a_at | Leucine zipper-EF-hand containing transmembrane protein 2              | LETM2       |
| 991   | 4,76     | 6,35    | -1,33 | 0,00571 | 0,315 | 1556301_at   | cDNA clone IMAGE:5288145                                               | -           |
| 5049  | 4,87     | 6,49    | -1,33 | 0,03889 | 0,420 | 232195_at    | G protein-coupled receptor 158                                         | GPR158      |
| 2958  | 15,8     | 21,1    | -1,33 | 0,02078 | 0,384 | 208776_at    | Proteasome (prosome, macropain) 26S subunit, non-ATPase, 11            | PSMD11      |
| 2019  | 7,20     | 9,59    | -1,33 | 0,01317 | 0,355 | 228875_at    | Chromosome 6 open reading frame 189                                    | C6orf189    |
| 1911  | 62,3     | 83,0    | -1,33 | 0,01244 | 0,355 | 222532_at    | Signal recognition particle receptor, B subunit                        | SRPRB       |
| 2297  | 72,8     | 97,0    | -1,33 | 0,01527 | 0,363 | 203219_s_at  | Adenine phosphoribosyltransferase                                      | APRT        |
| 2305  | 64,6     | 86,0    | -1,33 | 0,01530 | 0,363 | 218607_s_at  | SDA1 domain containing 1                                               | SDAD1       |
| 796   | 127      | 170     | -1,33 | 0,00455 | 0,311 | 228009_x_at  | Zinc ribbon domain containing 1                                        | ZNRD1       |
| 4362  | 27,5     | 36,6    | -1,33 | 0,03245 | 0,407 | 225458_at    | Hypothetical LOC25845                                                  | LOC25845    |
| 4798  | 24,0     | 31,9    | -1,33 | 0,03641 | 0,415 | 209556_at    | Neurochondrin                                                          | NCDN        |
| 2372  | 66,5     | 88,6    | -1,33 | 0,01583 | 0,364 | 203271_s_at  | Unc-119 homolog (C. elegans)                                           | UNC119      |
| 3217  | 86,1     | 115     | -1,33 | 0,02279 | 0,387 | 218919_at    | Zinc finger, AN1-type domain 1                                         | ZFAND1      |
| 5120  | 131      | 175     | -1,33 | 0,03941 | 0,421 | 225051_at    | Erythrocyte membrane protein band 4.1                                  | EPB41       |
| 2427  | 63,4     | 84,4    | -1,33 | 0,01623 | 0,365 | 219076_s_at  | Peroxisomal membrane protein 2, 22kDa                                  | PXMP2       |
| 1059  | 6,17     | 8,20    | -1,33 | 0,00621 | 0,319 | 214536_at    | Secreted LY6/PLAUR domain containing 1                                 | SLURP1      |
| 1351  | 9,25     | 12,3    | -1,33 | 0,00812 | 0,328 | 210530_s_at  | Nuclear receptor subfamily 2, group C, member 1                        | NR2C1       |
| 5896  | 62,6     | 83,2    | -1,33 | 0,04771 | 0,442 | 224368_s_at  | NDRG family member 3                                                   | NDRG3       |
| 4889  | 4,33     | 5,75    | -1,33 | 0,03738 | 0,418 | 242370_at    | NADP-dependent methylenetetrahydrofolate dehydrogenase 2-like protein  | MTHFD2L     |
| 4522  | 23,3     | 30,9    | -1,33 | 0,03411 | 0,412 | 202873_at    | ATPase, H+ transporting, lysosomal 42kDa, V1 subunit C1                | ATP6V1C1    |
| 3660  | 54,2     | 71,9    | -1,33 | 0,02644 | 0,395 | 226149_at    | Chromosome 20 open reading frame 198                                   | C20orf198   |
| 5504  | 52,5     | 69,7    | -1,33 | 0,04358 | 0,433 | 218284_at    | SMAD family member 3                                                   | SMAD3       |
| 2573  | 17,4     | 23,0    | -1,33 | 0,01744 | 0,371 | 229572_at    | Transcribed locus                                                      | -           |
| 5202  | 111      | 148     | -1,33 | 0,04011 | 0,422 | 217749_at    | Coatomer protein complex, subunit gamma                                | COPG        |
| 3779  | 56,9     | 75,5    | -1,33 | 0,02751 | 0,398 | 213264_at    | Poly(rC) binding protein 2                                             | PCBP2       |
| 6061  | 25,5     | 33,8    | -1,33 | 0,04943 | 0,446 | 225752_at    | Non imprinted in Prader-Willi/Angelman syndrome 1                      | NIPA1       |



| Index | Mutated* | Normal* | FC    | P value | FDR** | Probe set    | Description                                                       | Gene symbol      |
|-------|----------|---------|-------|---------|-------|--------------|-------------------------------------------------------------------|------------------|
| 5496  | 120      | 159     | -1,33 | 0,04349 | 0,433 | 213263_s_at  | Poly(rC) binding protein 2                                        | <i>PCBP2</i>     |
| 661   | 25,2     | 33,5    | -1,33 | 0,00382 | 0,308 | 208725_at    | Eukaryotic translation initiation factor 2, subunit 2 beta, 38kDa | <i>EIF2S2</i>    |
| 1269  | 208      | 275     | -1,33 | 0,00754 | 0,325 | 212114_at    | Hypothetical LOC552889                                            | <i>LOC552889</i> |
| 2534  | 121      | 160     | -1,33 | 0,01713 | 0,369 | 213892_s_at  | Adenine phosphoribosyltransferase                                 | <i>APRT</i>      |
| 4220  | 104      | 138     | -1,33 | 0,03128 | 0,405 | 202397_at    | Nuclear transport factor 2                                        | <i>NUTF2</i>     |
| 1793  | 608      | 806     | -1,33 | 0,01148 | 0,350 | 209066_x_at  | Ubiquinol-cytochrome c reductase binding protein                  | <i>UQCRB</i>     |
| 2647  | 19,6     | 25,9    | -1,32 | 0,01804 | 0,373 | 220137_at    | Hypothetical protein FLJ20674                                     | <i>FLJ20674</i>  |
| 1042  | 24,0     | 31,8    | -1,32 | 0,00608 | 0,319 | 226156_at    | v-AKT murine thymoma viral oncogene homolog 2                     | <i>AKT2</i>      |
| 3331  | 7,97     | 10,6    | -1,32 | 0,02364 | 0,388 | 205495_s_at  | Granulysin                                                        | <i>GNLY</i>      |
| 3768  | 36,5     | 48,3    | -1,32 | 0,02738 | 0,397 | 225300_at    | Chromosome 15 open reading frame 23                               | <i>C15orf23</i>  |
| 1479  | 10,1     | 13,3    | -1,32 | 0,00907 | 0,335 | 244627_at    | Dihydroxyacetone kinase 2 homolog (S. cerevisiae)                 | <i>DAK</i>       |
| 4488  | 167      | 221     | -1,32 | 0,03376 | 0,411 | 202087_s_at  | Cathepsin L1                                                      | <i>CTSL1</i>     |
| 3699  | 27,9     | 37,0    | -1,32 | 0,02675 | 0,395 | 205024_s_at  | RAD51 homolog (RecA homolog, E. coli) (S. cerevisiae)             | <i>RAD51</i>     |
| 5104  | 134      | 178     | -1,32 | 0,03927 | 0,421 | 209448_at    | HIV-1 Tat interactive protein 2, 30kDa                            | <i>HTATIP2</i>   |
| 3427  | 26,9     | 35,6    | -1,32 | 0,02452 | 0,391 | 236381_s_at  | WD repeat domain 8                                                | <i>WDR8</i>      |
| 1107  | 553      | 731     | -1,32 | 0,00649 | 0,319 | 217722_s_at  | Neugrin, neurite outgrowth associated                             | <i>NGRN</i>      |
| 5824  | 17,2     | 22,7    | -1,32 | 0,04706 | 0,442 | 211519_s_at  | Kinesin family member 2C                                          | <i>KIF2C</i>     |
| 4705  | 6,52     | 8,62    | -1,32 | 0,03558 | 0,413 | 1554508_at   | Phosphoinositide-3-kinase adaptor protein 1                       | <i>PIK3AP1</i>   |
| 1282  | 55,9     | 73,8    | -1,32 | 0,00764 | 0,325 | 209445_x_at  | Chromosome 7 open reading frame 44                                | <i>C7orf44</i>   |
| 663   | 62,2     | 82,1    | -1,32 | 0,00382 | 0,308 | 227008_at    | HD domain containing 3                                            | <i>HDDC3</i>     |
| 5763  | 48,4     | 63,9    | -1,32 | 0,04630 | 0,439 | 208955_at    | dUTP pyrophosphatase                                              | <i>DUT</i>       |
| 3322  | 32,7     | 43,1    | -1,32 | 0,02359 | 0,388 | 238032_at    | Transcribed locus                                                 | -                |
| 4022  | 19,3     | 25,5    | -1,32 | 0,02945 | 0,400 | 1553947_at   | Exosome component 6                                               | <i>EXOSC6</i>    |
| 4991  | 89,6     | 118     | -1,32 | 0,03830 | 0,419 | 219071_x_at  | Chromosome 8 open reading frame 30A                               | <i>C8orf30A</i>  |
| 3774  | 58,3     | 76,9    | -1,32 | 0,02742 | 0,397 | 229192_s_at  | Tubulin folding cofactor D                                        | <i>TBCD</i>      |
| 6073  | 393      | 518     | -1,32 | 0,04959 | 0,446 | 204427_s_at  | Transmembrane emp24 domain trafficking protein 2                  | <i>TMED2</i>     |
| 1909  | 109      | 144     | -1,32 | 0,01242 | 0,355 | 212751_at    | Ubiquitin-conjugating enzyme E2N                                  | <i>UBE2N</i>     |
| 1476  | 13,6     | 17,9    | -1,32 | 0,00902 | 0,334 | 219154_at    | RAS homolog gene family, member F (in filopodia)                  | <i>RHOF</i>      |
| 1056  | 139      | 183     | -1,32 | 0,00619 | 0,319 | 201000_at    | Alanyl-tRNA synthetase                                            | <i>AARS</i>      |
| 2237  | 15,3     | 20,2    | -1,32 | 0,01486 | 0,363 | 235389_at    | PHD finger protein 20                                             | <i>PHF20</i>     |
| 797   | 11,7     | 15,4    | -1,32 | 0,00456 | 0,311 | 206273_at    | Slowmo homolog 1 (Drosophila)                                     | <i>SLMO1</i>     |
| 3075  | 35,0     | 46,1    | -1,32 | 0,02169 | 0,385 | 203217_s_at  | ST3 beta-galactoside alpha-2,3-sialyltransferase 5                | <i>ST3GAL5</i>   |
| 2881  | 12,0     | 15,8    | -1,32 | 0,02022 | 0,383 | 227887_at    | Hypothetical LOC400236                                            | <i>LOC400236</i> |
| 2203  | 39,6     | 52,1    | -1,32 | 0,01457 | 0,361 | 1554451_s_at | Cytokine induced protein 29 kDa                                   | <i>CIP29</i>     |
| 3542  | 7,13     | 9,37    | -1,31 | 0,02549 | 0,393 | 205920_at    | Solute carrier family 6, member 6                                 | <i>SLC6A6</i>    |
| 2310  | 3,99     | 5,25    | -1,31 | 0,01535 | 0,363 | 237105_at    | cDNA FLJ46701 fis, clone TRACH3014063                             | -                |
| 5337  | 22,9     | 30,1    | -1,31 | 0,04178 | 0,428 | 238903_at    | Hypothetical protein LOC137886                                    | <i>LOC137886</i> |
| 2244  | 9,26     | 12,2    | -1,31 | 0,01492 | 0,363 | 231046_at    | cDNA clone IMAGE:4329532                                          | -                |
| 3753  | 85,9     | 113     | -1,31 | 0,02729 | 0,397 | 218549_s_at  | Family with sequence similarity 82, member B                      | <i>FAM82B</i>    |
| 2232  | 385      | 505     | -1,31 | 0,01483 | 0,363 | 223209_s_at  | Selenoprotein S                                                   | <i>SELS</i>      |
| 5733  | 17,1     | 22,5    | -1,31 | 0,04599 | 0,438 | 214877_at    | CDK5 regulatory subunit associated protein 1-like 1               | <i>CDKAL1</i>    |
| 1766  | 7,54     | 9,91    | -1,31 | 0,01126 | 0,348 | 237065_s_at  | Similar to Hepatitis B virus x-interacting protein                | -                |
| 2270  | 7,41     | 9,74    | -1,31 | 0,01508 | 0,363 | 235846_at    | cDNA FLJ23692 fis, clone HEP10227                                 | -                |
| 908   | 11,4     | 14,9    | -1,31 | 0,00524 | 0,313 | 244411_at    | Similar to Syntaxin binding protein 1                             | -                |
| 1255  | 6,82     | 8,94    | -1,31 | 0,00747 | 0,325 | 235814_at    | Similar to Genethonin 1                                           | -                |
| 5035  | 7,10     | 9,30    | -1,31 | 0,03878 | 0,420 | 219502_at    | Nei endonuclease VIII-like 3 (E. coli)                            | <i>NEIL3</i>     |
| 3520  | 141      | 185     | -1,31 | 0,02527 | 0,392 | 217932_at    | Mitochondrial ribosomal protein S7                                | <i>MRPS7</i>     |
| 4287  | 152      | 200     | -1,31 | 0,03185 | 0,406 | 221637_s_at  | Chromosome 11 open reading frame 48                               | <i>C11orf48</i>  |
| 1057  | 110      | 144     | -1,31 | 0,00621 | 0,319 | 212884_x_at  | Apolipoprotein E                                                  | <i>APOE</i>      |
| 5149  | 46,9     | 61,4    | -1,31 | 0,03964 | 0,421 | 213592_at    | Angiotensin II receptor-like 1                                    | <i>AGTRL1</i>    |
| 4232  | 52,8     | 69,2    | -1,31 | 0,03136 | 0,405 | 203446_s_at  | Oculocerebrorenal syndrome of Lowe                                | <i>OCRL</i>      |
| 2128  | 7,74     | 10,1    | -1,31 | 0,01400 | 0,359 | 214747_at    | Zinc finger, BED-type containing 4                                | <i>ZBED4</i>     |
| 3953  | 18,9     | 24,8    | -1,31 | 0,02888 | 0,399 | 227786_at    | Mediator complex subunit 30                                       | <i>MED30</i>     |
| 2512  | 9,16     | 12,0    | -1,31 | 0,01690 | 0,368 | 206106_at    | Mitogen-activated protein kinase 12                               | <i>MAPK12</i>    |
| 2435  | 136      | 178     | -1,31 | 0,01628 | 0,365 | 225480_at    | Chromosome 1 open reading frame 122                               | <i>C1orf122</i>  |
| 6119  | 5,44     | 7,11    | -1,31 | 0,04996 | 0,446 | 238369_s_at  | Similar to XP_001091806.1                                         | -                |
| 3981  | 6,48     | 8,48    | -1,31 | 0,02911 | 0,400 | 211077_s_at  | Tousled-like kinase 1                                             | <i>TLK1</i>      |

| Index | Mutated* | Normal* | FC    | P value | FDR** | Probe set    | Description                                                              | Gene symbol      |
|-------|----------|---------|-------|---------|-------|--------------|--------------------------------------------------------------------------|------------------|
| 4827  | 3,17     | 4,14    | -1,31 | 0,03675 | 0,416 | 243880_at    | Golgi SNAP receptor complex member 2                                     | <i>GOSR2</i>     |
| 704   | 9,94     | 13,0    | -1,31 | 0,00405 | 0,308 | 236958_at    | cDNA FLJ25271 fis, clone STM05584                                        | -                |
| 3511  | 19,8     | 25,9    | -1,31 | 0,02522 | 0,392 | 228444_at    | Transcribed locus                                                        | -                |
| 3390  | 39,4     | 51,4    | -1,31 | 0,02415 | 0,389 | 224728_at    | ATP synthase mitochondrial F1 complex assembly factor 1                  | <i>ATPAF1</i>    |
| 3910  | 34,0     | 44,4    | -1,31 | 0,02854 | 0,399 | 36564_at     | Ring finger protein 19B                                                  | <i>RNF19B</i>    |
| 1976  | 138      | 180     | -1,31 | 0,01291 | 0,355 | 226679_at    | Solute carrier family 26, member 11                                      | <i>SLC26A11</i>  |
| 2563  | 99,6     | 130     | -1,31 | 0,01738 | 0,371 | 218151_x_at  | G protein-coupled receptor 172A                                          | <i>GPR172A</i>   |
| 1054  | 98,4     | 128     | -1,30 | 0,00616 | 0,319 | 203342_at    | Translocase of inner mitochondrial membrane 17 homolog B (yeast)         | <i>TIMM17B</i>   |
| 1694  | 210      | 274     | -1,30 | 0,01072 | 0,346 | 219121_s_at  | RNA binding motif protein 35A                                            | <i>RBM35A</i>    |
| 4559  | 7,30     | 9,52    | -1,30 | 0,03445 | 0,412 | 203626_s_at  | S-phase kinase-associated protein 2 (p45)                                | <i>SKP2</i>      |
| 1500  | 23,9     | 31,2    | -1,30 | 0,00923 | 0,336 | 212707_s_at  | RAS p21 protein activator 4                                              | <i>RASA4</i>     |
| 2442  | 24,8     | 32,3    | -1,30 | 0,01632 | 0,365 | 1554321_a_at | NFS1 nitrogen fixation 1 homolog (S. cerevisiae)                         | <i>NFS1</i>      |
| 3249  | 58,1     | 75,7    | -1,30 | 0,02307 | 0,388 | 225779_at    | Solute carrier family 27, member 4                                       | <i>SLC27A4</i>   |
| 2535  | 44,6     | 58,1    | -1,30 | 0,01714 | 0,369 | 204287_at    | Synaptogyrin 1                                                           | <i>SYNGR1</i>    |
| 1069  | 15,8     | 20,6    | -1,30 | 0,00628 | 0,319 | 229577_at    | Transcribed locus                                                        | -                |
| 1570  | 8,53     | 11,1    | -1,30 | 0,00976 | 0,340 | 204100_at    | Thyroid hormone receptor alpha                                           | <i>THRA</i>      |
| 5853  | 37,6     | 49,0    | -1,30 | 0,04734 | 0,442 | 1559399_s_at | Zinc finger, CCHC domain containing 10                                   | <i>ZCCHC10</i>   |
| 1677  | 6,87     | 8,95    | -1,30 | 0,01058 | 0,345 | 241972_at    | Hypothetical LOC401588                                                   | <i>LOC401588</i> |
| 5577  | 9,47     | 12,3    | -1,30 | 0,04447 | 0,436 | 205165_at    | Cadherin, EGF LAG seven-pass G-type receptor 3 (flamingo homolog, Drosop | <i>CELSR3</i>    |
| 4999  | 7,12     | 9,26    | -1,30 | 0,03839 | 0,420 | 233057_at    | Heat shock 22kDa protein 8                                               | <i>HSPB8</i>     |
| 5491  | 33,1     | 43,0    | -1,30 | 0,04346 | 0,433 | 210154_at    | Malic enzyme 2, NAD(+)-dependent, mitochondrial                          | <i>ME2</i>       |
| 5527  | 82,6     | 107     | -1,30 | 0,04382 | 0,434 | 212090_at    | Glutamate receptor, NMDA subtype, Glutamate-binding subunit              | <i>GRINA</i>     |
| 3801  | 238      | 310     | -1,30 | 0,02769 | 0,398 | 218206_x_at  | SCAN domain containing 1                                                 | <i>SCAND1</i>    |
| 289   | 356      | 463     | -1,30 | 0,00142 | 0,263 | 201698_s_at  | Splicing factor, arginine/serine-rich 9                                  | <i>SFRS9</i>     |
| 2525  | 364      | 474     | -1,30 | 0,01704 | 0,369 | 225846_at    | RNA binding motif protein 35A                                            | <i>RBM35A</i>    |
| 5061  | 64,2     | 83,5    | -1,30 | 0,03896 | 0,420 | 202069_s_at  | Isocitrate dehydrogenase 3 (NAD+) alpha                                  | <i>IDH3A</i>     |
| 4837  | 12,3     | 16,0    | -1,30 | 0,03688 | 0,417 | 206612_at    | Calcium channel, voltage-dependent, gamma subunit 1                      | <i>CACNG1</i>    |
| 893   | 10,2     | 13,3    | -1,30 | 0,00517 | 0,313 | 239941_at    | Similar to Mitochondrial ribosomal protein S23                           | -                |
| 5909  | 106      | 137     | -1,30 | 0,04789 | 0,443 | 222500_at    | Peptidylprolyl isomerase (cyclophilin)-like 1                            | <i>PPIL1</i>     |
| 3387  | 47,5     | 61,6    | -1,30 | 0,02413 | 0,389 | 1552279_a_at | Solute carrier family 46, member 1                                       | <i>SLC46A1</i>   |
| 4690  | 7,01     | 9,11    | -1,30 | 0,03543 | 0,413 | 236312_at    | Transcribed locus                                                        | -                |
| 1565  | 16,1     | 20,9    | -1,30 | 0,00972 | 0,339 | 210240_s_at  | Cyclin-dependent kinase inhibitor 2D                                     | <i>CDKN2D</i>    |
| 4207  | 180      | 234     | -1,30 | 0,03110 | 0,404 | 201212_at    | Legumain                                                                 | <i>LGMN</i>      |
| 4316  | 243      | 315     | -1,30 | 0,03214 | 0,407 | 218482_at    | Enhancer of yellow 2 homolog (Drosophila)                                | <i>ENY2</i>      |
| 1150  | 3,98     | 5,16    | -1,30 | 0,00677 | 0,321 | 1557448_a_at | cDNA clone IMAGE:5298376                                                 | -                |
| 2710  | 22,3     | 28,9    | -1,30 | 0,01860 | 0,375 | 205733_at    | Bloom syndrome                                                           | <i>BLM</i>       |
| 2258  | 40,5     | 52,5    | -1,30 | 0,01502 | 0,363 | 234972_at    | ADP-ribosylation factor-like 16                                          | <i>ARL16</i>     |
| 2196  | 6,81     | 8,84    | -1,30 | 0,01452 | 0,361 | 230932_at    | Transcribed locus                                                        | -                |
| 4679  | 128      | 166     | -1,30 | 0,03533 | 0,413 | 222998_at    | MAF1 homolog (S. cerevisiae)                                             | <i>MAF1</i>      |
| 3831  | 24,5     | 31,8    | -1,30 | 0,02798 | 0,399 | 238472_at    | F-box protein 9                                                          | <i>FBXO9</i>     |
| 2539  | 25,6     | 33,2    | -1,30 | 0,01717 | 0,369 | 205432_at    | Oviductal glycoprotein 1, 120kDa (mucin 9, oviductin)                    | <i>OVGP1</i>     |
| 4138  | 33,7     | 43,7    | -1,30 | 0,03052 | 0,403 | 204368_at    | Solute carrier organic anion transporter family, member 2A1              | <i>SLCO2A1</i>   |
| 824   | 204      | 265     | -1,30 | 0,00470 | 0,312 | 217898_at    | Chromosome 15 open reading frame 24                                      | <i>C15orf24</i>  |
| 2422  | 118      | 153     | -1,30 | 0,01620 | 0,365 | 221597_s_at  | HSPC171 protein                                                          | <i>HSPC171</i>   |
| 4415  | 139      | 180     | -1,30 | 0,03301 | 0,409 | 232652_x_at  | SCAN domain containing 1                                                 | <i>SCAND1</i>    |
| 3135  | 19,5     | 25,2    | -1,30 | 0,02222 | 0,387 | 221837_at    | Kelch-like 22 (Drosophila)                                               | <i>KLHL22</i>    |
| 5919  | 62,2     | 80,6    | -1,30 | 0,04798 | 0,443 | 204278_s_at  | Estrogen receptor binding site associated, antigen, 9                    | <i>EBAG9</i>     |
| 1257  | 36,2     | 46,8    | -1,29 | 0,00749 | 0,325 | 204970_s_at  | Basic leucine zipper transcription factor MafG                           | <i>MAFG</i>      |
| 1825  | 93,6     | 121     | -1,29 | 0,01176 | 0,351 | 223107_s_at  | Zinc finger, CCHC domain containing 17                                   | <i>ZCCHC17</i>   |
| 3397  | 127      | 164     | -1,29 | 0,02424 | 0,390 | 206055_s_at  | Small nuclear ribonucleoprotein polypeptide A'                           | <i>SNRPA1</i>    |
| 3015  | 19,1     | 24,7    | -1,29 | 0,02122 | 0,385 | 218727_at    | Amino acid transporter                                                   | <i>FLJ10815</i>  |
| 694   | 46,4     | 60,1    | -1,29 | 0,00400 | 0,308 | 225067_at    | Unc-51-like kinase 3 (C. elegans)                                        | <i>ULK3</i>      |
| 1375  | 20,1     | 26,0    | -1,29 | 0,00829 | 0,329 | 226687_at    | PRP40 pre-mRNA processing factor 40 homolog A (S. cerevisiae)            | <i>PRPF40A</i>   |
| 2271  | 89,2     | 115     | -1,29 | 0,01508 | 0,363 | 204565_at    | Thioesterase superfamily member 2                                        | <i>THEM2</i>     |
| 2843  | 29,1     | 37,7    | -1,29 | 0,01988 | 0,382 | 35846_at     | Thyroid hormone receptor alpha                                           | <i>THRA</i>      |
| 2996  | 26,0     | 33,5    | -1,29 | 0,02110 | 0,385 | 44673_at     | Sialic acid binding Ig-like lectin 1, sialoadhesin                       | <i>SIGLEC1</i>   |
| 9     | 28,9     | 37,3    | -1,29 | 0,00002 | 0,117 | 218415_at    | Vacuolar protein sorting 33 homolog B (yeast)                            | <i>VPS33B</i>    |

| Index | Mutated* | Normal* | FC    | P value | FDR** | Probe set   | Description                                                     | Gene symbol |
|-------|----------|---------|-------|---------|-------|-------------|-----------------------------------------------------------------|-------------|
| 365   | 5,97     | 7,71    | -1,29 | 0,00190 | 0,284 | 239848_at   | cDNA FLJ41316 fis, clone BRAMY2043314                           | -           |
| 5956  | 17,1     | 22,0    | -1,29 | 0,04832 | 0,444 | 204887_s_at | Polo-like kinase 4 (Drosophila)                                 | PLK4        |
| 4105  | 28,1     | 36,3    | -1,29 | 0,03017 | 0,402 | 220178_at   | Chromosome 19 open reading frame 28                             | C19orf28    |
| 5961  | 69,6     | 89,8    | -1,29 | 0,04839 | 0,444 | 227527_at   | Myeloid/lymphoid or mixed-lineage leukemia 2                    | MLL2        |
| 3147  | 629      | 812     | -1,29 | 0,02234 | 0,387 | 205849_s_at | Ubiquinol-cytochrome c reductase binding protein                | UQCRCB      |
| 2246  | 12,5     | 16,1    | -1,29 | 0,01493 | 0,363 | 228894_at   | Nuclear receptor subfamily 6, group A, member 1                 | NR6A1       |
| 5296  | 49,6     | 63,9    | -1,29 | 0,04127 | 0,426 | 205089_at   | Zinc finger protein 7                                           | ZNF7        |
| 5070  | 38,3     | 49,4    | -1,29 | 0,03901 | 0,420 | 213704_at   | RAB geranylgeranyltransferase, beta subunit                     | RABGGTB     |
| 4739  | 24,6     | 31,7    | -1,29 | 0,03588 | 0,414 | 204649_at   | Trophinin associated protein (tastin)                           | TROAP       |
| 5886  | 68,6     | 88,5    | -1,29 | 0,04762 | 0,442 | 210010_s_at | Solute carrier family 25, member 1                              | SLC25A1     |
| 3130  | 33,0     | 42,5    | -1,29 | 0,02221 | 0,387 | 203777_s_at | Ribosomal protein S6 kinase, 70kDa, polypeptide 2               | RPS6KB2     |
| 4906  | 37,1     | 47,7    | -1,29 | 0,03751 | 0,418 | 229453_at   | Protein disulfide isomerase family A, member 3                  | PDIA3       |
| 3729  | 9,47     | 12,2    | -1,29 | 0,02708 | 0,397 | 228828_at   | Clone IMAGE:5215917, mRNA                                       | -           |
| 4988  | 54,8     | 70,5    | -1,29 | 0,03828 | 0,419 | 91684_g_at  | Exosome component 4                                             | EXOSC4      |
| 61    | 11,3     | 14,5    | -1,29 | 0,00023 | 0,201 | 227201_at   | Hypothetical protein LOC643837                                  | LOC643837   |
| 1364  | 162      | 208     | -1,29 | 0,00821 | 0,328 | 217957_at   | Chromosome 16 open reading frame 80                             | C16orf80    |
| 4586  | 34,0     | 43,8    | -1,29 | 0,03467 | 0,412 | 242790_at   | SNF8, ESCRT-II complex subunit, homolog (S. cerevisiae)         | SNF8        |
| 3716  | 4,16     | 5,36    | -1,29 | 0,02694 | 0,396 | 215943_at   | KIAA1661 protein                                                | KIAA1661    |
| 4240  | 35,5     | 45,8    | -1,29 | 0,03145 | 0,406 | 1552612_at  | CDC42 small effector 2                                          | CDC42SE2    |
| 1704  | 45,9     | 59,0    | -1,29 | 0,01087 | 0,348 | 208316_s_at | Oculocerebrorenal syndrome of Lowe                              | OCRL        |
| 2148  | 24,6     | 31,6    | -1,29 | 0,01414 | 0,360 | 217998_at   | Pleckstrin homology-like domain, family A, member 1             | PHLDA1      |
| 990   | 490      | 630     | -1,29 | 0,00571 | 0,315 | 217962_at   | Nucleolar protein family A, member 3                            | NOLA3       |
| 2686  | 49,9     | 64,1    | -1,29 | 0,01840 | 0,375 | 215722_s_at | Small nuclear ribonucleoprotein polypeptide A'                  | SNRPA1      |
| 5308  | 40,3     | 51,7    | -1,29 | 0,04141 | 0,426 | 225901_at   | Protein tyrosine phosphatase, mitochondrial 1                   | PTPMT1      |
| 1359  | 10,2     | 13,1    | -1,28 | 0,00819 | 0,328 | 235574_at   | Guanylate binding protein 4                                     | GBP4        |
| 5373  | 14,8     | 19,0    | -1,28 | 0,04216 | 0,429 | 235625_at   | Vacuolar protein sorting 41 homolog (S. cerevisiae)             | VPS41       |
| 3092  | 22,2     | 28,6    | -1,28 | 0,02180 | 0,385 | 223811_s_at | Chromosome 7 open reading frame 20                              | C7orf20     |
| 3966  | 21,3     | 27,4    | -1,28 | 0,02897 | 0,399 | 216698_x_at | Olfactory receptor, family 7, subfamily E, member 47 pseudogene | OR7E47P     |
| 5014  | 29,1     | 37,4    | -1,28 | 0,03856 | 0,420 | 214081_at   | Plexin domain containing 1                                      | PLXDC1      |
| 5941  | 9,56     | 12,3    | -1,28 | 0,04816 | 0,443 | 207043_s_at | Solute carrier family 6, member 9                               | SLC6A9      |
| 3627  | 18,0     | 23,1    | -1,28 | 0,02621 | 0,395 | 207458_at   | Chromosome 8 open reading frame 51                              | C8orf51     |
| 3297  | 244      | 313     | -1,28 | 0,02349 | 0,388 | 217748_at   | Adiponectin receptor 1                                          | ADIPOR1     |
| 161   | 13,0     | 16,7    | -1,28 | 0,00073 | 0,244 | 238087_at   | RNA terminal phosphate cyclase domain 1                         | RTCD1       |
| 3024  | 12,1     | 15,5    | -1,28 | 0,02129 | 0,385 | 220491_at   | Hepcidin antimicrobial peptide                                  | HAMP        |
| 3692  | 6,42     | 8,24    | -1,28 | 0,02666 | 0,395 | 237369_at   | Transcribed locus                                               | -           |
| 2429  | 40,3     | 51,7    | -1,28 | 0,01624 | 0,365 | 203320_at   | SH2B adaptor protein 3                                          | SH2B3       |
| 1437  | 13,6     | 17,4    | -1,28 | 0,00870 | 0,331 | 211434_s_at | Chemokine (C-C motif) receptor-like 2                           | CCRL2       |
| 4548  | 114      | 146     | -1,28 | 0,03438 | 0,412 | 223120_at   | Fucosidase, alpha-L- 2, plasma                                  | FUCA2       |
| 5167  | 46,5     | 59,6    | -1,28 | 0,03982 | 0,421 | 229232_at   | Leucine rich repeat containing 57                               | LRRC57      |
| 2419  | 51,2     | 65,6    | -1,28 | 0,01617 | 0,365 | 227456_s_at | Chromosome 6 open reading frame 136                             | C6orf136    |
| 5044  | 7,31     | 9,37    | -1,28 | 0,03886 | 0,420 | 205581_s_at | Nitric oxide synthase 3 (endothelial cell)                      | NOS3        |
| 3287  | 31,0     | 39,8    | -1,28 | 0,02342 | 0,388 | 204819_at   | FYVE, RhoGEF and PH domain containing 1                         | FGD1        |
| 5416  | 404      | 518     | -1,28 | 0,04256 | 0,430 | 202306_at   | Polymerase (RNA) II (DNA directed) polypeptide G                | POLR2G      |
| 5692  | 109      | 139     | -1,28 | 0,04553 | 0,437 | 202541_at   | Small inducible cytokine subfamily E, member 1                  | SCYE1       |
| 1343  | 15,5     | 19,9    | -1,28 | 0,00806 | 0,328 | 238507_at   | Transcribed locus                                               | -           |
| 4423  | 95,3     | 122     | -1,28 | 0,03311 | 0,409 | 224742_at   | Abhydrolase domain containing 12                                | ABHD12      |
| 3057  | 7,37     | 9,44    | -1,28 | 0,02153 | 0,385 | 239493_at   | Ribosomal protein L7                                            | RPL7        |
| 4503  | 246      | 315     | -1,28 | 0,03389 | 0,411 | 212250_at   | Metadherin                                                      | MTDH        |
| 1304  | 62,6     | 80,1    | -1,28 | 0,00777 | 0,325 | 212434_at   | GrpE-like 1, mitochondrial (E. coli)                            | GRPEL1      |
| 2374  | 226      | 290     | -1,28 | 0,01583 | 0,364 | 224957_at   | Chromosome 18 open reading frame 32                             | C18orf32    |
| 355   | 67,1     | 85,8    | -1,28 | 0,00182 | 0,280 | 1553987_at  | Chromosome 12 open reading frame 47                             | C12orf47    |
| 5508  | 5,47     | 7,00    | -1,28 | 0,04364 | 0,433 | 221195_at   | PTD016 protein                                                  | LOC51136    |
| 3452  | 11,1     | 14,2    | -1,28 | 0,02471 | 0,391 | 206655_s_at | Glycoprotein Ib (platelet), beta polypeptide                    | GP1BB       |
| 4573  | 3,36     | 4,30    | -1,28 | 0,03457 | 0,412 | 220022_at   | Zinc finger protein 334                                         | ZNF334      |
| 4291  | 5,92     | 7,56    | -1,28 | 0,03190 | 0,406 | 238427_at   | GrpE-like 2, mitochondrial (E. coli)                            | GRPEL2      |
| 5725  | 135      | 172     | -1,28 | 0,04591 | 0,438 | 209397_at   | Malic enzyme 2, NAD(+)-dependent, mitochondrial                 | ME2         |
| 1863  | 54,8     | 70,1    | -1,28 | 0,01203 | 0,353 | 224804_s_at | Chromosome 15 open reading frame 17                             | C15orf17    |

| Index | Mutated* | Normal* | FC    | P value | FDR** | Probe set    | Description                                                        | Gene symbol |
|-------|----------|---------|-------|---------|-------|--------------|--------------------------------------------------------------------|-------------|
| 424   | 15,3     | 19,5    | -1,28 | 0,00223 | 0,288 | 209552_at    | Paired box 8                                                       | PAX8        |
| 2303  | 70,9     | 90,4    | -1,28 | 0,01530 | 0,363 | 1558136_s_at | Transcription initiation factor TFIIID 28 kD subunit               | TAF11       |
| 4450  | 16,4     | 21,0    | -1,27 | 0,03343 | 0,411 | 232186_at    | Chromosome 20 open reading frame 142                               | C20orf142   |
| 2212  | 19,1     | 24,3    | -1,27 | 0,01466 | 0,362 | 220200_s_at  | SET domain containing (lysine methyltransferase) 8                 | SETD8       |
| 2649  | 26,4     | 33,6    | -1,27 | 0,01806 | 0,373 | 228566_at    | Hypothetical protein FLJ10656                                      | P15RS       |
| 5242  | 8,23     | 10,5    | -1,27 | 0,04060 | 0,423 | 232422_at    | Hypothetical protein BC004360                                      | -           |
| 2971  | 14,0     | 17,8    | -1,27 | 0,02087 | 0,384 | 220291_at    | Glycerophosphodiester phosphodiesterase domain containing 2        | GDPD2       |
| 4043  | 3,66     | 4,65    | -1,27 | 0,02964 | 0,401 | 210447_at    | Glutamate dehydrogenase 2                                          | GLUD2       |
| 5593  | 8,17     | 10,4    | -1,27 | 0,04461 | 0,436 | 205568_at    | Aquaporin 9                                                        | AQP9        |
| 1234  | 7,73     | 9,83    | -1,27 | 0,00734 | 0,324 | 208511_at    | Pituitary tumor-transforming 3                                     | PTTG3       |
| 2295  | 42,0     | 53,4    | -1,27 | 0,01527 | 0,363 | 227093_at    | Ubiquitin specific peptidase 36                                    | USP36       |
| 4543  | 8,49     | 10,8    | -1,27 | 0,03434 | 0,412 | 37145_at     | Granulysin                                                         | GNLY        |
| 4055  | 183      | 232     | -1,27 | 0,02975 | 0,401 | 231059_x_at  | SCAN domain containing 1                                           | SCAND1      |
| 3685  | 8,14     | 10,3    | -1,27 | 0,02661 | 0,395 | 1552737_s_at | WW domain containing E3 ubiquitin protein ligase 2                 | WWP2        |
| 2803  | 6,08     | 7,72    | -1,27 | 0,01949 | 0,380 | 210360_s_at  | Metastasis suppressor 1                                            | MTSS1       |
| 847   | 86,4     | 110     | -1,27 | 0,00488 | 0,313 | 225208_s_at  | Family with sequence similarity 103, member A1                     | FAM103A1    |
| 4469  | 78,6     | 99,8    | -1,27 | 0,03357 | 0,411 | 225592_at    | Nurim (nuclear envelope membrane protein)                          | NRM         |
| 598   | 31,8     | 40,3    | -1,27 | 0,00329 | 0,301 | 225212_at    | Solute carrier family 25, member 25                                | SLC25A25    |
| 4272  | 9,65     | 12,2    | -1,27 | 0,03175 | 0,406 | 223570_at    | Minichromosome maintenance complex component 10                    | MCM10       |
| 1021  | 54,0     | 68,4    | -1,27 | 0,00591 | 0,316 | 1554553_s_at | Yip1 interacting factor homolog B (S. cerevisiae)                  | YIF1B       |
| 683   | 30,3     | 38,4    | -1,27 | 0,00392 | 0,308 | 209777_s_at  | Solute carrier family 19, member 1                                 | SLC19A1     |
| 5174  | 59,4     | 75,3    | -1,27 | 0,03985 | 0,421 | 225637_at    | Differentially expressed in FDCP 8 homolog (mouse)                 | DEF8        |
| 2939  | 42,7     | 54,2    | -1,27 | 0,02062 | 0,383 | 225699_at    | Chromosome 7 open reading frame 40                                 | C7orf40     |
| 5338  | 19,9     | 25,2    | -1,27 | 0,04179 | 0,428 | 31799_at     | Clone 24627 mRNA sequence                                          | -           |
| 4259  | 43,9     | 55,6    | -1,27 | 0,03166 | 0,406 | 202104_s_at  | Spastic paraplegia 7 protein                                       | SPG7        |
| 4590  | 122      | 155     | -1,27 | 0,03472 | 0,412 | 212228_s_at  | Coenzyme Q9 homolog (S. cerevisiae)                                | COQ9        |
| 2290  | 24,6     | 31,1    | -1,27 | 0,01523 | 0,363 | 211320_s_at  | Protein tyrosine phosphatase, receptor type, U                     | PTPRU       |
| 510   | 108      | 137     | -1,27 | 0,00270 | 0,289 | 225434_at    | Death effector domain containing 2                                 | DEDD2       |
| 3885  | 7,66     | 9,70    | -1,27 | 0,02837 | 0,399 | 1556227_at   | Valosin containing protein (p97)/p47 complex interacting protein 1 | VCIPI1      |
| 6012  | 8,25     | 10,4    | -1,27 | 0,04888 | 0,445 | 239652_at    | Transcribed locus                                                  | -           |
| 1478  | 28,3     | 35,8    | -1,27 | 0,00905 | 0,335 | 227042_at    | LOC150223 protein                                                  | LOC150223   |
| 2234  | 15,4     | 19,5    | -1,26 | 0,01484 | 0,363 | 230039_at    | -                                                                  | -           |
| 1072  | 23,2     | 29,4    | -1,26 | 0,00628 | 0,319 | 1562228_s_at | Phosphodiesterase 5A, cGMP-specific                                | PDE5A       |
| 2365  | 316      | 399     | -1,26 | 0,01579 | 0,364 | 211984_at    | Calmodulin 1 (phosphorylase kinase, delta)                         | CALM1       |
| 1490  | 16,6     | 21,0    | -1,26 | 0,00919 | 0,336 | 205256_at    | Zinc finger and BTB domain containing 39                           | ZBTB39      |
| 4769  | 4,96     | 6,27    | -1,26 | 0,03614 | 0,414 | 206925_at    | ST8 alpha-N-acetyl-neuraminide alpha-2,8-sialyltransferase 4       | ST8SIA4     |
| 3795  | 43,1     | 54,5    | -1,26 | 0,02765 | 0,398 | 218813_s_at  | SH3-domain GRB2-like endophilin B2                                 | SH3GLB2     |
| 4628  | 6,73     | 8,50    | -1,26 | 0,03490 | 0,412 | 1559051_s_at | Chromosome 6 open reading frame 150                                | C6orf150    |
| 2388  | 92,3     | 117     | -1,26 | 0,01592 | 0,364 | 217543_s_at  | Membrane-bound transcription factor peptidase, site 1              | MBTPS1      |
| 703   | 37,7     | 47,6    | -1,26 | 0,00403 | 0,308 | 56821_at     | Amino acid transporter                                             | FLJ10815    |
| 4684  | 94,5     | 119     | -1,26 | 0,03536 | 0,413 | 221736_at    | KIAA1219 protein                                                   | KIAA1219    |
| 4401  | 8,59     | 10,8    | -1,26 | 0,03281 | 0,408 | 210786_s_at  | Friend leukemia virus integration 1                                | FLI1        |
| 1957  | 29,7     | 37,5    | -1,26 | 0,01279 | 0,355 | 227103_s_at  | Endothelin converting enzyme 2                                     | ECE2        |
| 5045  | 40,2     | 50,6    | -1,26 | 0,03888 | 0,420 | 218821_at    | Aminopeptidase-like 1                                              | NPEPL1      |
| 2282  | 202      | 255     | -1,26 | 0,01516 | 0,363 | 224748_at    | WD repeat domain 68                                                | WDR68       |
| 2098  | 16,6     | 21,0    | -1,26 | 0,01375 | 0,358 | 229570_at    | Laminin, alpha 5                                                   | LAMA5       |
| 764   | 39,2     | 49,5    | -1,26 | 0,00432 | 0,309 | 224907_s_at  | SH3-domain GRB2-like endophilin B2                                 | SH3GLB2     |
| 167   | 16,9     | 21,3    | -1,26 | 0,00078 | 0,244 | 224433_s_at  | DEAD (Asp-Glu-Ala-Asp) box polypeptide 54                          | DDX54       |
| 43    | 93,3     | 118     | -1,26 | 0,00018 | 0,201 | 221777_at    | Chromosome 12 open reading frame 52                                | C12orf52    |
| 1259  | 106      | 134     | -1,26 | 0,00750 | 0,325 | 208996_s_at  | Polymerase (RNA) II (DNA directed) polypeptide C, 33kDa            | POLR2C      |
| 918   | 16,0     | 20,1    | -1,26 | 0,00529 | 0,313 | 213449_at    | Ribonucleases P/MRP protein subunit POP1                           | POP1        |
| 2763  | 146      | 184     | -1,26 | 0,01920 | 0,379 | 1555780_a_at | RAS homolog enriched in brain                                      | RHEB        |
| 3097  | 71,7     | 90,2    | -1,26 | 0,02187 | 0,386 | 223639_s_at  | Zinc ribbon domain containing 1                                    | ZNRD1       |
| 2060  | 68,3     | 85,9    | -1,26 | 0,01344 | 0,356 | 218592_s_at  | Cat eye syndrome chromosome region, candidate 5                    | CECR5       |
| 423   | 10,1     | 12,7    | -1,26 | 0,00222 | 0,287 | 227358_at    | Zinc finger and BTB domain containing 46                           | ZBTB46      |
| 4100  | 44,8     | 56,4    | -1,26 | 0,03013 | 0,402 | 225704_at    | KIAA1545 protein                                                   | KIAA1545    |
| 2044  | 5,20     | 6,54    | -1,26 | 0,01329 | 0,355 | 232794_at    | Hypothetical protein LOC153682                                     | LOC153682   |

| Index | Mutated* | Normal* | FC    | P value | FDR** | Probe set    | Description                                                       | Gene symbol |
|-------|----------|---------|-------|---------|-------|--------------|-------------------------------------------------------------------|-------------|
| 5506  | 40,8     | 51,4    | -1,26 | 0,04361 | 0,433 | 208424_s_at  | Cytokine induced apoptosis inhibitor 1                            | CIAPIN1     |
| 3364  | 58,0     | 72,9    | -1,26 | 0,02390 | 0,388 | 64064_at     | GTPase, IMAP family member 5                                      | GIMAP5      |
| 187   | 11,5     | 14,5    | -1,26 | 0,00087 | 0,244 | 236537_at    | cDNA FLJ23896 fis, clone LNG15157                                 | -           |
| 4932  | 46,6     | 58,6    | -1,26 | 0,03782 | 0,419 | 202974_at    | Membrane protein, palmitoylated 1, 55kDa                          | MPP1        |
| 5746  | 38,0     | 47,8    | -1,26 | 0,04609 | 0,439 | 226793_at    | Hypothetical protein LOC283267                                    | LOC283267   |
| 5908  | 19,8     | 24,9    | -1,26 | 0,04789 | 0,443 | 209052_s_at  | Wolf-Hirschhorn syndrome candidate 1                              | WHSC1       |
| 5897  | 10,4     | 13,1    | -1,26 | 0,04772 | 0,442 | 219742_at    | Proline rich 7 (synaptic)                                         | PRR7        |
| 1887  | 14,9     | 18,7    | -1,26 | 0,01225 | 0,355 | 230974_at    | DEAD (Asp-Glu-Ala-As) box polypeptide 19B                         | DDX19B      |
| 4696  | 870      | 1092    | -1,26 | 0,03547 | 0,413 | 214359_s_at  | Heat shock protein 90kDa alpha (cytosolic), class B member 1      | HSP90AB1    |
| 4832  | 28,2     | 35,4    | -1,26 | 0,03681 | 0,416 | 219491_at    | Leucine rich repeat and fibronectin type III domain containing 4  | LRFN4       |
| 298   | 11,2     | 14,1    | -1,26 | 0,00145 | 0,263 | 230025_at    | Gap junction protein, chi 1, 31.9kDa                              | GJC1        |
| 5111  | 43,1     | 54,1    | -1,26 | 0,03934 | 0,421 | 221011_s_at  | Limb bud and heart development homolog (mouse)                    | LBH         |
| 5271  | 51,7     | 64,8    | -1,25 | 0,04096 | 0,425 | 219394_at    | PhosphatidylglyceroPhosphate synthase 1                           | PGS1        |
| 173   | 6,22     | 7,81    | -1,25 | 0,00080 | 0,244 | 1569452_at   | Hypothetical locus LOC692247                                      | LOC692247   |
| 1325  | 28,9     | 36,2    | -1,25 | 0,00795 | 0,328 | 213861_s_at  | Family with sequence similarity 119, member B                     | FAM119B     |
| 3786  | 30,2     | 37,9    | -1,25 | 0,02758 | 0,398 | 227818_at    | Coiled-coil domain containing 21                                  | CCDC21      |
| 1380  | 11,6     | 14,5    | -1,25 | 0,00830 | 0,329 | 232959_at    | Similar to Septin 7                                               | LOC645513   |
| 1356  | 25,1     | 31,4    | -1,25 | 0,00817 | 0,328 | 228870_at    | Family with sequence similarity 84, member B                      | FAM84B      |
| 2378  | 87,7     | 110     | -1,25 | 0,01586 | 0,364 | 210153_s_at  | Malic enzyme 2, NAD(+)-dependent, mitochondrial                   | ME2         |
| 3383  | 4,70     | 5,89    | -1,25 | 0,02409 | 0,389 | 222881_at    | Heparanase                                                        | HPSE        |
| 3472  | 11,0     | 13,8    | -1,25 | 0,02491 | 0,392 | 206617_s_at  | Renin binding protein                                             | RENBP       |
| 5843  | 13,6     | 17,0    | -1,25 | 0,04722 | 0,442 | 1553971_a_at | Opposite strand transcription unit to STAG3                       | GATS        |
| 2820  | 110      | 138     | -1,25 | 0,01969 | 0,381 | 208848_at    | Alcohol dehydrogenase 5 (class III), chi polypeptide              | ADH5        |
| 3013  | 43,7     | 54,8    | -1,25 | 0,02119 | 0,385 | 226063_at    | VAV2 guanine nucleotide exchange factor                           | VAV2        |
| 252   | 5,30     | 6,65    | -1,25 | 0,00117 | 0,254 | 236916_at    | Serine/threonine kinase receptor associated protein               | STRAP       |
| 2750  | 104      | 130     | -1,25 | 0,01901 | 0,378 | 208785_s_at  | Microtubule-associated protein 1 light chain 3 beta               | MAP1LC3B    |
| 4969  | 35,6     | 44,6    | -1,25 | 0,03812 | 0,419 | 230606_at    | Gap junction protein, chi 1, 31.9kDa                              | GJC1        |
| 1991  | 1572     | 1969    | -1,25 | 0,01302 | 0,355 | 200064_at    | Heat shock protein 90kDa alpha (cytosolic), class B member 1      | HSP90AB1    |
| 5772  | 7,65     | 9,58    | -1,25 | 0,04639 | 0,439 | 210606_x_at  | Killer cell lectin-like receptor subfamily D, member 1            | KLRD1       |
| 5711  | 401      | 502     | -1,25 | 0,04573 | 0,438 | 202836_s_at  | Thioredoxin-like 4A                                               | TXNL4A      |
| 1950  | 222      | 277     | -1,25 | 0,01273 | 0,355 | 202483_s_at  | RAN binding protein 1                                             | RANBP1      |
| 2021  | 10,5     | 13,1    | -1,25 | 0,01317 | 0,355 | 236200_at    | Fas (TNFRSF6) associated factor 1                                 | FAF1        |
| 4809  | 108      | 135     | -1,25 | 0,03652 | 0,415 | 208968_s_at  | Cytokine induced apoptosis inhibitor 1                            | CIAPIN1     |
| 219   | 45,3     | 56,7    | -1,25 | 0,00100 | 0,250 | 218660_at    | Dysferlin, limb girdle muscular dystrophy 2B                      | DYSF        |
| 4336  | 3,47     | 4,34    | -1,25 | 0,03227 | 0,407 | 1559072_a_at | Leucine rich repeat containing 62                                 | LRRC62      |
| 168   | 7,28     | 9,10    | -1,25 | 0,00078 | 0,244 | 231777_at    | Casein kinase 2, beta polypeptide                                 | CSNK2B      |
| 5509  | 4,15     | 5,19    | -1,25 | 0,04365 | 0,433 | 210146_x_at  | Leukocyte immunoglobulin-like receptor, subfamily B member 2      | LILRB2      |
| 4796  | 58,9     | 73,6    | -1,25 | 0,03638 | 0,415 | 219952_s_at  | Mucolipin 1                                                       | MCOLN1      |
| 5335  | 9,83     | 12,3    | -1,25 | 0,04177 | 0,428 | 214775_at    | Nedd4 binding protein 3                                           | N4BP3       |
| 5997  | 4,69     | 5,85    | -1,25 | 0,04875 | 0,444 | 210567_s_at  | S-phase kinase-associated protein 2 (p45)                         | SKP2        |
| 1940  | 13,5     | 16,9    | -1,25 | 0,01264 | 0,355 | 205396_at    | SMAD family member 3                                              | SMAD3       |
| 1755  | 8,07     | 10,1    | -1,25 | 0,01118 | 0,348 | 214530_x_at  | Erythrocyte membrane protein band 4.1                             | EPB41       |
| 4114  | 11,1     | 13,9    | -1,25 | 0,03025 | 0,402 | 230271_at    | One cut homeobox 2                                                | ONECUT2     |
| 2628  | 34,1     | 42,6    | -1,25 | 0,01790 | 0,372 | 213324_at    | v-src sarcoma (Schmidt-Ruppin A-2) viral oncogene homolog (avian) | SRC         |
| 4095  | 4,00     | 5,00    | -1,25 | 0,03009 | 0,402 | 208388_at    | Nuclear receptor subfamily 2, group E, member 3                   | NR2E3       |
| 2233  | 18,1     | 22,6    | -1,25 | 0,01484 | 0,363 | 219760_at    | Lin-7 homolog B (C. elegans)                                      | LIN7B       |
| 4468  | 28,5     | 35,6    | -1,25 | 0,03357 | 0,411 | 229535_at    | Protein tyrosine phosphatase, mitochondrial 1                     | PTPMT1      |
| 1663  | 9,06     | 11,3    | -1,25 | 0,01050 | 0,345 | 231110_at    | Transcribed locus                                                 | -           |
| 2471  | 33,6     | 41,9    | -1,25 | 0,01660 | 0,367 | 219202_at    | Rhomboid 5 homolog 2 (Drosophila)                                 | RHBDF2      |
| 4496  | 13,4     | 16,8    | -1,25 | 0,03382 | 0,411 | 215285_s_at  | Putative homeodomain transcription factor 1                       | PHTF1       |
| 755   | 19,3     | 24,0    | -1,25 | 0,00427 | 0,308 | 228364_at    | Zinc finger protein 784                                           | ZNF784      |
| 3211  | 52,0     | 64,8    | -1,25 | 0,02274 | 0,387 | 209680_s_at  | Kinesin family member C1                                          | KIFC1       |
| 2459  | 6,03     | 7,52    | -1,25 | 0,01651 | 0,367 | 218851_s_at  | WD repeat domain 33                                               | WDR33       |
| 993   | 52,0     | 64,8    | -1,25 | 0,00572 | 0,315 | 38157_at     | Dom-3 homolog Z (C. elegans)                                      | DOM3Z       |
| 5988  | 8,38     | 10,4    | -1,25 | 0,04865 | 0,444 | 1557667_at   | cDNA FLJ36588 fis, clone TRACH2013991                             | -           |
| 740   | 12,9     | 16,1    | -1,25 | 0,00420 | 0,308 | 219194_at    | Semaphorin-4G                                                     | SEMA4G      |
| 2658  | 10,5     | 13,1    | -1,25 | 0,01813 | 0,373 | 238572_at    | Hypothetical protein MGC16211                                     | MGC16211    |

| Index | Mutated* | Normal* | FC    | P value | FDR** | Probe set    | Description                                                               | Gene symbol |
|-------|----------|---------|-------|---------|-------|--------------|---------------------------------------------------------------------------|-------------|
| 3723  | 10,3     | 12,8    | -1,24 | 0,02702 | 0,397 | 240297_at    | Transcribed locus                                                         | -           |
| 1135  | 60,1     | 74,8    | -1,24 | 0,00664 | 0,319 | 223954_x_at  | Neuronal calcium-binding protein NECAB3                                   | APBA2BP     |
| 359   | 73,6     | 91,6    | -1,24 | 0,00184 | 0,281 | 203536_s_at  | Cytosolic iron-sulfur protein assembly 1 homolog ( <i>S. cerevisiae</i> ) | CIAO1       |
| 33    | 8,19     | 10,2    | -1,24 | 0,00015 | 0,201 | 227057_at    | Rho GTPase activating protein 27                                          | ARHGAP27    |
| 3727  | 253      | 315     | -1,24 | 0,02706 | 0,397 | 212248_at    | cDNA FLJ41088 fis, clone ASTRO2002459 (Metadherin)                        | MTDH        |
| 363   | 4,49     | 5,59    | -1,24 | 0,00190 | 0,284 | 239184_at    | Transcribed locus                                                         | -           |
| 3674  | 32,4     | 40,3    | -1,24 | 0,02654 | 0,395 | 214955_at    | Transmembrane protease, serine 6                                          | TMPRSS6     |
| 3312  | 137      | 171     | -1,24 | 0,02355 | 0,388 | 223108_s_at  | Zinc finger, CCHC domain containing 17                                    | ZCCHC17     |
| 5275  | 6,07     | 7,56    | -1,24 | 0,04099 | 0,425 | 219264_s_at  | Protein phosphatase 2A 48 kDa regulatory subunit                          | PPP2R3B     |
| 1184  | 32,0     | 39,8    | -1,24 | 0,00697 | 0,322 | 216397_s_at  | Block of proliferation 1                                                  | BOP1        |
| 1188  | 20,1     | 25,0    | -1,24 | 0,00700 | 0,322 | 204974_at    | RAB3A, member RAS oncogene family                                         | RAB3A       |
| 2348  | 22,9     | 28,4    | -1,24 | 0,01566 | 0,364 | 213520_at    | RecQ protein-like 4                                                       | RECQL4      |
| 4474  | 43,0     | 53,5    | -1,24 | 0,03364 | 0,411 | 207845_s_at  | Anaphase promoting complex subunit 10                                     | ANAPC10     |
| 309   | 29,9     | 37,1    | -1,24 | 0,00149 | 0,264 | 217199_s_at  | Signal transducer and activator of transcription 2                        | STAT2       |
| 5726  | 9,13     | 11,3    | -1,24 | 0,04591 | 0,438 | 1558369_at   | M-phase phosphoprotein 9                                                  | MPHOSPH9    |
| 4650  | 48,2     | 59,9    | -1,24 | 0,03508 | 0,413 | 219214_s_at  | 5', 3'-nucleotidase, cytosolic                                            | NT5C        |
| 4270  | 140      | 174     | -1,24 | 0,03175 | 0,406 | 223649_s_at  | Solute carrier family 25, member 39                                       | SLC25A39    |
| 2661  | 9,47     | 11,8    | -1,24 | 0,01817 | 0,373 | 229892_at    | EP400 N-terminal like                                                     | EP400NL     |
| 3433  | 21,0     | 26,1    | -1,24 | 0,02457 | 0,391 | 336_at       | Thromboxane A2 receptor                                                   | TBXA2R      |
| 180   | 23,4     | 29,0    | -1,24 | 0,00084 | 0,244 | 238628_s_at  | Trafficking protein particle complex 2-like                               | TRAPP2CL    |
| 2453  | 65,0     | 80,7    | -1,24 | 0,01645 | 0,366 | 219953_s_at  | Chromosome 11 open reading frame 17                                       | C11orf17    |
| 1575  | 6,61     | 8,20    | -1,24 | 0,00979 | 0,340 | 242308_at    | Mucolipin 3                                                               | MCOLN3      |
| 2942  | 40,0     | 49,6    | -1,24 | 0,02062 | 0,383 | 212528_at    | cDNA clone IMAGE:3878236                                                  | -           |
| 3937  | 586      | 726     | -1,24 | 0,02876 | 0,399 | 200750_s_at  | RAN, member RAS oncogene family                                           | RAN         |
| 2002  | 10,1     | 12,5    | -1,24 | 0,01307 | 0,355 | 230616_at    | Similar to Laminin, beta 2 (laminin 5) isoform 2                          | -           |
| 3260  | 236      | 292     | -1,24 | 0,02314 | 0,388 | 202109_at    | ADP-ribosylation factor interacting protein 2 (arfaptin 2)                | ARFIP2      |
| 1650  | 9,55     | 11,8    | -1,24 | 0,01038 | 0,344 | 238146_at    | Transcribed locus                                                         | -           |
| 3000  | 29,3     | 36,2    | -1,24 | 0,02112 | 0,385 | 232675_s_at  | Uridine-cytidine kinase 1-like 1                                          | UCKL1       |
| 629   | 28,4     | 35,2    | -1,24 | 0,00356 | 0,308 | 225577_at    | HLA complex group 18                                                      | HCG18       |
| 89    | 63,1     | 78,1    | -1,24 | 0,00033 | 0,201 | 121_at       | Paired box 8                                                              | PAX8        |
| 3762  | 7,93     | 9,82    | -1,24 | 0,02735 | 0,397 | 1558123_at   | Hypothetical protein FLJ35390                                             | FLJ35390    |
| 1719  | 7,21     | 8,92    | -1,24 | 0,01101 | 0,348 | 1554677_s_at | CKLF-like MARVEL transmembrane domain containing 4                        | CMTM4       |
| 2163  | 25,7     | 31,8    | -1,24 | 0,01431 | 0,361 | 229031_at    | cDNA FLJ25763 fis, clone TST06294                                         | -           |
| 3280  | 7,52     | 9,30    | -1,24 | 0,02336 | 0,388 | 238425_at    | Transcribed locus                                                         | -           |
| 899   | 306      | 379     | -1,24 | 0,00521 | 0,313 | 202579_x_at  | High mobility group nucleosomal binding domain 4                          | HMGN4       |
| 4971  | 37,8     | 46,8    | -1,24 | 0,03813 | 0,419 | 231808_at    | Keratin associated protein 4-7                                            | KRTAP4-7    |
| 1944  | 7,97     | 9,85    | -1,24 | 0,01267 | 0,355 | 228747_at    | Sec61 alpha 2 subunit ( <i>S. cerevisiae</i> )                            | SEC61A2     |
| 3868  | 10,9     | 13,5    | -1,24 | 0,02825 | 0,399 | 222748_s_at  | Thioredoxin-like 4B                                                       | TXNL4B      |
| 2944  | 5,39     | 6,66    | -1,24 | 0,02064 | 0,383 | 234211_at    | cDNA FLJ21436 fis, clone COL04279                                         | -           |
| 1828  | 15,8     | 19,5    | -1,24 | 0,01178 | 0,351 | 229426_at    | Cytochrome c oxidase subunit Va                                           | COX5A       |
| 1287  | 7,89     | 9,75    | -1,24 | 0,00765 | 0,325 | 238798_at    | Transmembrane anterior posterior transformation 1                         | TAPT1       |
| 1103  | 115      | 142     | -1,23 | 0,00646 | 0,319 | 207396_s_at  | Asparagine-linked glycosylation 3 homolog                                 | ALG3        |
| 2141  | 24,0     | 29,7    | -1,23 | 0,01408 | 0,360 | 209495_at    | centrosomal protein 250kDa                                                | CEP250      |
| 5322  | 29,2     | 36,0    | -1,23 | 0,04161 | 0,427 | 204857_at    | MAD1 mitotic arrest deficient-like 1 (yeast)                              | MAD1L1      |
| 3842  | 89,7     | 111     | -1,23 | 0,02805 | 0,399 | 218836_at    | Ribonuclease P/MRP 21kDa subunit                                          | RPP21       |
| 261   | 5,81     | 7,17    | -1,23 | 0,00123 | 0,257 | 239856_at    | Similar to XP_001175123.1                                                 | -           |
| 2808  | 7,16     | 8,83    | -1,23 | 0,01954 | 0,380 | 1560577_at   | cDNA clone IMAGE:4827370                                                  | -           |
| 2765  | 64,5     | 79,5    | -1,23 | 0,01920 | 0,379 | 226437_at    | Yip1 interacting factor homolog B ( <i>S. cerevisiae</i> )                | YIF1B       |
| 3436  | 6,44     | 7,94    | -1,23 | 0,02459 | 0,391 | 1556039_s_at | G protein-coupled receptor 173                                            | GPR173      |
| 490   | 18,6     | 22,9    | -1,23 | 0,00262 | 0,289 | 202835_at    | Thioredoxin-like 4A                                                       | TXNL4A      |
| 3984  | 212      | 262     | -1,23 | 0,02914 | 0,400 | 201520_s_at  | G-rich RNA sequence binding factor 1                                      | GRSF1       |
| 1228  | 34,9     | 43,0    | -1,23 | 0,00730 | 0,324 | 203402_at    | Potassium channel shaker chain beta 2                                     | KCNAB2      |
| 4254  | 5,96     | 7,34    | -1,23 | 0,03158 | 0,406 | 1556545_at   | cDNA FLJ32379 fis, clone SKMUS1000030                                     | -           |
| 2495  | 13,1     | 16,1    | -1,23 | 0,01682 | 0,367 | 213669_at    | FCH domain only 1                                                         | FCHO1       |
| 1885  | 34,7     | 42,8    | -1,23 | 0,01224 | 0,355 | 223222_at    | Solute carrier family 25, member 19                                       | SLC25A19    |
| 4685  | 35,9     | 44,3    | -1,23 | 0,03537 | 0,413 | 209833_at    | CASP2 and RIPK1 domain containing adaptor with death domain               | CRADD       |
| 5652  | 19,4     | 23,9    | -1,23 | 0,04509 | 0,436 | 208603_s_at  | Mitogen-activated protein kinase 8 interacting protein 2                  | MAPK8IP2    |

| Index | Mutated* | Normal* | FC    | P value | FDR** | Probe set    | Description                                                             | Gene symbol |
|-------|----------|---------|-------|---------|-------|--------------|-------------------------------------------------------------------------|-------------|
| 414   | 8,71     | 10,7    | -1,23 | 0,00218 | 0,286 | 1569428_at   | Within bgcn homolog (Drosophila)                                        | WIBG        |
| 1757  | 6,18     | 7,61    | -1,23 | 0,01120 | 0,348 | 203578_s_at  | Solute carrier family 7, member 6                                       | SLC7A6      |
| 45    | 12,4     | 15,3    | -1,23 | 0,00018 | 0,201 | 211888_x_at  | Caspase 10, apoptosis-related cysteine peptidase                        | CASP10      |
| 2782  | 66,8     | 82,3    | -1,23 | 0,01933 | 0,380 | 225593_at    | LSM10, U7 small nuclear RNA associated                                  | LSM10       |
| 552   | 24,5     | 30,2    | -1,23 | 0,00299 | 0,296 | 235663_at    | -                                                                       | -           |
| 5526  | 27,5     | 33,8    | -1,23 | 0,04381 | 0,433 | 224798_s_at  | Chromosome 15 open reading frame 17                                     | C15orf17    |
| 1317  | 57,2     | 70,4    | -1,23 | 0,00784 | 0,325 | 212133_at    | Non imprinted in Prader-Willi/Angelman syndrome 2                       | NIPA2       |
| 3904  | 18,1     | 22,3    | -1,23 | 0,02851 | 0,399 | 224357_s_at  | Membrane-spanning 4-domains, subfamily A, member 4                      | MS4A4A      |
| 4160  | 7,79     | 9,59    | -1,23 | 0,03076 | 0,404 | 1554063_at   | Chromosome 8 open reading frame 76                                      | C8orf76     |
| 3654  | 28,3     | 34,8    | -1,23 | 0,02641 | 0,395 | 232025_at    | Synaptotagmin VII                                                       | SYT7        |
| 4020  | 62,6     | 77,1    | -1,23 | 0,02943 | 0,400 | 200861_at    | CCR4-NOT transcription complex, subunit 1                               | CNOT1       |
| 996   | 128      | 158     | -1,23 | 0,00575 | 0,316 | 208722_s_at  | Anaphase promoting complex subunit 5                                    | ANAPC5      |
| 296   | 57,3     | 70,5    | -1,23 | 0,00145 | 0,263 | 44111_at     | Vacuolar protein sorting 33 homolog B (yeast)                           | VPS33B      |
| 5417  | 3,58     | 4,40    | -1,23 | 0,04256 | 0,430 | 231797_at    | SIX homeobox 4                                                          | SIX4        |
| 2597  | 42,6     | 52,3    | -1,23 | 0,01765 | 0,371 | 233168_s_at  | Selenoprotein O                                                         | SELO        |
| 3416  | 58,0     | 71,2    | -1,23 | 0,02439 | 0,390 | 221629_x_at  | Chromosome 8 open reading frame 30A                                     | C8orf30A    |
| 4286  | 10,1     | 12,4    | -1,23 | 0,03185 | 0,406 | 227055_at    | Methyltransferase like 7B                                               | METTL7B     |
| 2370  | 56,5     | 69,4    | -1,23 | 0,01580 | 0,364 | 226488_at    | RCC1 domain containing 1                                                | RCCD1       |
| 5856  | 12,5     | 15,3    | -1,23 | 0,04735 | 0,442 | 1565483_at   | Receptor tyrosine-protein kinase erbB-1                                 | EGFR        |
| 1254  | 7,17     | 8,81    | -1,23 | 0,00747 | 0,325 | 1555617_x_at | -                                                                       | -           |
| 686   | 24,7     | 30,4    | -1,23 | 0,00393 | 0,308 | 213847_at    | Peripherin                                                              | PRPH        |
| 2316  | 118      | 145     | -1,23 | 0,01538 | 0,363 | 1554149_at   | Claudin domain containing 1                                             | CLDND1      |
| 1207  | 204      | 250     | -1,23 | 0,00716 | 0,324 | 202529_at    | Phosphoribosyl pyrophosphate synthetase-associated protein 1            | PRPSAP1     |
| 2286  | 5,83     | 7,15    | -1,23 | 0,01520 | 0,363 | 242941_x_at  | T-box 1                                                                 | TBX1        |
| 5469  | 7,69     | 9,44    | -1,23 | 0,04324 | 0,432 | 205057_s_at  | Iduronidase, alpha-L-                                                   | IDUA        |
| 1233  | 320      | 392     | -1,23 | 0,00733 | 0,324 | 202567_at    | Small nuclear ribonucleoprotein D3 polypeptide 18kDa                    | SNRPD3      |
| 1238  | 42,7     | 52,4    | -1,23 | 0,00736 | 0,324 | 223931_s_at  | Checkpoint with forkhead and ring finger domains                        | CHFR        |
| 4979  | 65,6     | 80,4    | -1,23 | 0,03821 | 0,419 | 204247_s_at  | Cyclin-dependent kinase 5                                               | CDK5        |
| 614   | 7,84     | 9,60    | -1,23 | 0,00348 | 0,308 | 223564_s_at  | Guanine nucleotide binding protein (G protein), beta polypeptide 1-like | GNB1L       |
| 1631  | 22,0     | 27,0    | -1,23 | 0,01028 | 0,344 | 238690_at    | -                                                                       | -           |
| 4743  | 551      | 676     | -1,23 | 0,03593 | 0,414 | 207809_s_at  | ATPase, H+ transporting, lysosomal accessory protein 1                  | ATP6AP1     |
| 2361  | 7,21     | 8,84    | -1,23 | 0,01575 | 0,364 | 205805_s_at  | Receptor tyrosine kinase-like orphan Receptor 1                         | ROR1        |
| 1515  | 23,5     | 28,8    | -1,23 | 0,00936 | 0,337 | 218670_at    | Pseudouridylate synthase 1                                              | PUS1        |
| 221   | 28,7     | 35,1    | -1,23 | 0,00102 | 0,250 | 205142_x_at  | ATP-binding cassette, sub-family D (ALD), member 1                      | ABCD1       |
| 5554  | 12,7     | 15,6    | -1,23 | 0,04421 | 0,435 | 242938_s_at  | Forkhead box K2                                                         | FOKK2       |
| 1602  | 19,0     | 23,2    | -1,22 | 0,00999 | 0,341 | 214228_x_at  | Tumor necrosis factor receptor superfamily, member 4                    | TNFRSF4     |
| 3681  | 4,60     | 5,64    | -1,22 | 0,02658 | 0,395 | 216959_x_at  | Neuronal cell adhesion molecule                                         | NRCAM       |
| 5203  | 57,8     | 70,7    | -1,22 | 0,04013 | 0,422 | 203612_at    | Bystin-like                                                             | BYSL        |
| 641   | 9,76     | 12,0    | -1,22 | 0,00365 | 0,308 | 204239_s_at  | Neuronatin                                                              | NNAT        |
| 3514  | 13,6     | 16,7    | -1,22 | 0,02522 | 0,392 | 228525_at    | Similar to Low density lipoprotein receptor-related protein 3           | -           |
| 5867  | 103      | 127     | -1,22 | 0,04742 | 0,442 | 217913_at    | Vacuolar protein sorting 4 homolog A (S. cerevisiae)                    | VPS4A       |
| 3036  | 66,5     | 81,4    | -1,22 | 0,02140 | 0,385 | 209895_at    | Protein tyrosine phosphatase, non-receptor type 11                      | PTPN11      |
| 1891  | 168      | 205     | -1,22 | 0,01228 | 0,355 | 212231_at    | F-box protein 21                                                        | FBXO21      |
| 4631  | 26,1     | 31,9    | -1,22 | 0,03493 | 0,412 | 222517_at    | Adaptor-related protein complex 3, mu 1 subunit                         | AP3M1       |
| 969   | 133      | 163     | -1,22 | 0,00562 | 0,315 | 217796_s_at  | Nuclear protein localization 4 homolog (S. cerevisiae)                  | NPLOC4      |
| 4795  | 13,3     | 16,3    | -1,22 | 0,03637 | 0,415 | 214755_at    | UDP-N-acetylglucosamine pyrophosphorylase 1-like 1                      | UAP1L1      |
| 5447  | 13,8     | 16,9    | -1,22 | 0,04297 | 0,431 | 206186_at    | Membrane protein, palmitoylated 3                                       | MPP3        |
| 4930  | 33,4     | 40,9    | -1,22 | 0,03781 | 0,419 | 225616_at    | SPRY domain containing 4                                                | SPRYD4      |
| 5058  | 7,19     | 8,79    | -1,22 | 0,03895 | 0,420 | 220577_at    | GTPase, very large interferon inducible 1                               | GVIN1       |
| 3977  | 100      | 123     | -1,22 | 0,02908 | 0,400 | 225879_at    | tRNA splicing endonuclease 54 homolog (S. cerevisiae)                   | TSEN54      |
| 4817  | 11,6     | 14,2    | -1,22 | 0,03662 | 0,416 | 221158_at    | Chromosome 21 open reading frame 66                                     | C21orf66    |
| 3483  | 276      | 337     | -1,22 | 0,02501 | 0,392 | 210213_s_at  | Eukaryotic translation initiation factor 6                              | EIF6        |
| 5768  | 10,1     | 12,3    | -1,22 | 0,04634 | 0,439 | 228449_at    | Similar to LOC150291 protein                                            | -           |
| 5483  | 498      | 608     | -1,22 | 0,04339 | 0,433 | 209046_s_at  | GABA(A) receptor-associated protein-like 2                              | GABARAPL2   |
| 2848  | 3,91     | 4,77    | -1,22 | 0,01994 | 0,383 | 222270_at    | SMEK homolog 2, suppressor of mek1 (Dictyostelium)                      | SMEK2       |
| 6020  | 49,4     | 60,3    | -1,22 | 0,04899 | 0,445 | 202111_at    | Solute carrier family 4, anion exchanger, member 2                      | SLC4A2      |
| 3252  | 11,9     | 14,6    | -1,22 | 0,02308 | 0,388 | 227876_at    | KIAA1688 protein                                                        | KIAA1688    |

| Index | Mutated* | Normal* | FC    | P value | FDR** | Probe set    | Description                                                 | Gene symbol |
|-------|----------|---------|-------|---------|-------|--------------|-------------------------------------------------------------|-------------|
| 32    | 12,6     | 15,3    | -1,22 | 0,00014 | 0,201 | 230169_at    | THAP domain containing 6                                    | THAP6       |
| 5635  | 21,1     | 25,7    | -1,22 | 0,04498 | 0,436 | 226564_at    | ZFAT zinc finger 1                                          | ZFAT1       |
| 4508  | 13,1     | 16,0    | -1,22 | 0,03397 | 0,412 | 228676_at    | Oral cancer overexpressed 1                                 | ORAOV1      |
| 1506  | 5,62     | 6,85    | -1,22 | 0,00927 | 0,336 | 238782_at    | cDNA FLJ41633 fis, clone FCBBF3003435                       | -           |
| 2428  | 32,0     | 39,0    | -1,22 | 0,01623 | 0,365 | 217924_at    | Chromosome 6 open reading frame 106                         | C6orf106    |
| 2373  | 180      | 220     | -1,22 | 0,01583 | 0,364 | 226935_s_at  | CLPTM1-like                                                 | CLPTM1L     |
| 6107  | 20,7     | 25,2    | -1,22 | 0,04985 | 0,446 | 236989_at    | Transcribed locus                                           | -           |
| 5613  | 48,5     | 59,1    | -1,22 | 0,04477 | 0,436 | 218927_s_at  | Carbohydrate (chondroitin 4) sulfotransferase 12            | CHST12      |
| 1248  | 11,5     | 14,1    | -1,22 | 0,00741 | 0,324 | 227901_at    | Hypothetical LOC648987                                      | LOC648987   |
| 4632  | 31,8     | 38,8    | -1,22 | 0,03494 | 0,412 | 213688_at    | Calmodulin 1 (phosphorylase kinase, delta)                  | CALM1       |
| 2660  | 11,5     | 14,0    | -1,22 | 0,01816 | 0,373 | 230293_at    | MSTP088 (MST088)                                            | -           |
| 2065  | 14,3     | 17,4    | -1,22 | 0,01348 | 0,356 | 214819_at    | IQ motif and Sec7 domain 2                                  | IQSEC2      |
| 483   | 11,8     | 14,4    | -1,22 | 0,00258 | 0,289 | 1554616_at   | Serpin peptidase inhibitor, clade B (ovalbumin), member 8   | SERPINB8    |
| 5187  | 14,6     | 17,8    | -1,22 | 0,03997 | 0,421 | 217124_at    | IQ motif containing E                                       | IQCE        |
| 5544  | 6,35     | 7,75    | -1,22 | 0,04407 | 0,435 | 208253_at    | Sialic acid binding Ig-like lectin 8                        | SIGLEC8     |
| 4978  | 69,0     | 84,1    | -1,22 | 0,03820 | 0,419 | 209217_s_at  | WD repeat domain 45                                         | WDR45       |
| 2211  | 9,47     | 11,5    | -1,22 | 0,01465 | 0,362 | 227726_at    | Ring finger protein 166                                     | RNF166      |
| 4096  | 8,28     | 10,1    | -1,22 | 0,03010 | 0,402 | 228641_at    | Caspase recruitment domain family, member 8                 | CARD8       |
| 5821  | 31,5     | 38,3    | -1,22 | 0,04704 | 0,442 | 229741_at    | Hypothetical protein MGC3260                                | MGC3260     |
| 2543  | 16,1     | 19,6    | -1,22 | 0,01719 | 0,369 | 227799_at    | Myosin IG                                                   | MYO1G       |
| 4198  | 58,3     | 70,9    | -1,22 | 0,03103 | 0,404 | 202407_s_at  | PRP31 pre-mRNA processing factor 31 homolog (S. cerevisiae) | PRPF31      |
| 3789  | 25,9     | 31,5    | -1,22 | 0,02759 | 0,398 | 229121_at    | cDNA FLJ44441 fis, clone UTERU2020242                       | -           |
| 3525  | 14,3     | 17,4    | -1,22 | 0,02529 | 0,392 | 241640_at    | B-cell receptor-associated protein 29                       | BCAP29      |
| 132   | 6,48     | 7,89    | -1,22 | 0,00059 | 0,240 | 220138_at    | Heart and neural crest derivatives expressed 1              | HAND1       |
| 3368  | 5,77     | 7,02    | -1,22 | 0,02393 | 0,388 | 235291_s_at  | Hypothetical protein LOC643977                              | FLJ32255    |
| 4611  | 10,1     | 12,3    | -1,22 | 0,03482 | 0,412 | 215938_s_at  | Phospholipase A2, group VI (cytosolic, calcium-independent) | PLA2G6      |
| 4766  | 45,4     | 55,3    | -1,22 | 0,03611 | 0,414 | 221752_at    | Slingshot homolog 1 (Drosophila)                            | SSH1        |
| 6115  | 45,3     | 55,1    | -1,22 | 0,04992 | 0,446 | 227815_at    | Transcribed locus                                           | -           |
| 183   | 4,12     | 5,02    | -1,22 | 0,00085 | 0,244 | 207226_at    | Histone cluster 1, H2bn                                     | HIST1H2BN   |
| 5398  | 5,43     | 6,60    | -1,22 | 0,04234 | 0,429 | 239696_at    | Transcribed locus                                           | -           |
| 2638  | 6,80     | 8,26    | -1,22 | 0,01798 | 0,373 | 216929_x_at  | ABO blood group                                             | ABO         |
| 145   | 6,30     | 7,66    | -1,22 | 0,00066 | 0,244 | 207510_at    | Bradykinin receptor B1                                      | BDKRB1      |
| 3641  | 774      | 940     | -1,22 | 0,02633 | 0,395 | 208689_s_at  | Ribophorin II                                               | RPN2        |
| 856   | 6,71     | 8,15    | -1,22 | 0,00494 | 0,313 | 243017_at    | Transcribed locus                                           | -           |
| 3443  | 35,0     | 42,5    | -1,21 | 0,02463 | 0,391 | 205448_s_at  | Mitogen-activated protein kinase kinase kinase 12           | MAP3K12     |
| 1038  | 15,1     | 18,3    | -1,21 | 0,00604 | 0,318 | 218457_s_at  | DNA (cytosine-5-)-methyltransferase 3 alpha                 | DNMT3A      |
| 1848  | 23,7     | 28,8    | -1,21 | 0,01190 | 0,352 | 238760_at    | Tyrosyl-tRNA synthetase                                     | YARS        |
| 107   | 57,7     | 70,1    | -1,21 | 0,00043 | 0,217 | 225271_at    | Transmembrane protein 63B                                   | TMEM63B     |
| 2681  | 13,5     | 16,3    | -1,21 | 0,01836 | 0,374 | 226442_at    | Ankyrin repeat and BTB (POZ) domain containing 1            | ABTB1       |
| 799   | 28,3     | 34,3    | -1,21 | 0,00456 | 0,311 | 1553015_a_at | RecQ protein-like 4                                         | RECQL4      |
| 2594  | 42,2     | 51,2    | -1,21 | 0,01765 | 0,371 | 210647_x_at  | Phospholipase A2, group VI (cytosolic, calcium-independent) | PLA2G6      |
| 538   | 19,7     | 23,9    | -1,21 | 0,00289 | 0,293 | 229408_at    | Histone deacetylase 5                                       | HDAC5       |
| 3467  | 10,9     | 13,3    | -1,21 | 0,02484 | 0,392 | 235614_at    | Transmembrane protein 151                                   | TMEM151     |
| 2684  | 94,0     | 114     | -1,21 | 0,01839 | 0,375 | 200913_at    | Protein phosphatase 2, catalytic subunit, gamma isoform     | PPM1G       |
| 634   | 5,51     | 6,69    | -1,21 | 0,00361 | 0,308 | 236787_at    | cDNA FLJ35091 fis, clone PLACE6005786                       | -           |
| 5036  | 16,4     | 19,9    | -1,21 | 0,03880 | 0,420 | 231003_at    | Solute carrier family 35, member B3                         | SLC35B3     |
| 2956  | 20,4     | 24,8    | -1,21 | 0,02076 | 0,384 | 215283_at    | Hypothetical gene supported by BC041875                     | LOC400642   |
| 4242  | 47,7     | 57,9    | -1,21 | 0,03148 | 0,406 | 215982_s_at  | Dom-3 homolog Z (C. elegans)                                | DOM3Z       |
| 404   | 11,4     | 13,8    | -1,21 | 0,00213 | 0,286 | 1570156_s_at | Formin 1                                                    | FMN1        |
| 777   | 7,80     | 9,46    | -1,21 | 0,00445 | 0,311 | 244707_at    | Transcribed locus                                           | -           |
| 3372  | 21,7     | 26,3    | -1,21 | 0,02399 | 0,389 | 204947_at    | E2F transcription factor 1                                  | E2F1        |
| 3918  | 154      | 186     | -1,21 | 0,02861 | 0,399 | 218132_s_at  | tRNA splicing endonuclease 34 homolog (S. cerevisiae)       | TSEN34      |
| 1031  | 6,42     | 7,78    | -1,21 | 0,00597 | 0,317 | 238829_at    | Transcribed locus                                           | -           |
| 367   | 27,5     | 33,3    | -1,21 | 0,00191 | 0,284 | 218725_at    | Solute carrier family 25, member 22                         | SLC25A22    |
| 5981  | 340      | 412     | -1,21 | 0,04856 | 0,444 | 201011_at    | Ribophorin I                                                | RPN1        |
| 2674  | 62,8     | 76,1    | -1,21 | 0,01828 | 0,374 | 90265_at     | Centaurin, alpha 1                                          | CENTA1      |
| 1626  | 12,4     | 15,0    | -1,21 | 0,01023 | 0,344 | 205484_at    | Signaling threshold regulating transmembrane adaptor 1      | SIT1        |



| Index | Mutated* | Normal* | FC    | P value | FDR** | Probe set    | Description                                                  | Gene symbol |
|-------|----------|---------|-------|---------|-------|--------------|--------------------------------------------------------------|-------------|
| 5172  | 124      | 150     | -1,21 | 0,03984 | 0,421 | 1564207_at   | Hypothetical protein FLJ35390                                | FLJ35390    |
| 5460  | 28,8     | 34,9    | -1,21 | 0,04313 | 0,432 | 221991_at    | Neurexophilin 3                                              | NXP3        |
| 5226  | 5,52     | 6,69    | -1,21 | 0,04043 | 0,423 | 224525_s_at  | Obg-like ATPase 1                                            | OLA1        |
| 5309  | 40,6     | 49,1    | -1,21 | 0,04143 | 0,426 | 212871_at    | Mitogen-activated protein kinase-activated protein kinase 5  | MAPKAPK5    |
| 1090  | 6,00     | 7,27    | -1,21 | 0,00640 | 0,319 | 212272_at    | Lipin 1                                                      | LPIN1       |
| 3932  | 5,02     | 6,08    | -1,21 | 0,02874 | 0,399 | 238598_s_at  | cDNA FLJ44201 fis, clone THYMU3000841                        | -           |
| 4119  | 9,99     | 12,1    | -1,21 | 0,03028 | 0,402 | 211210_x_at  | SH2 domain protein 1A, Duncan's disease                      | SH2D1A      |
| 2349  | 3,89     | 4,70    | -1,21 | 0,01567 | 0,364 | 244224_x_at  | Ly6/neurotoxin 1                                             | LYNX1       |
| 3855  | 163      | 198     | -1,21 | 0,02815 | 0,399 | 212361_s_at  | ATPase, Ca++ transporting, cardiac muscle, slow twitch 2     | ATP2A2      |
| 4086  | 8,51     | 10,3    | -1,21 | 0,03002 | 0,402 | 1553568_a_at | Histone cluster 1, H1t                                       | HIST1H1T    |
| 1750  | 13,2     | 16,0    | -1,21 | 0,01117 | 0,348 | 217187_at    | Mucin 5AC, oligomeric mucus/gel-forming                      | MUC5AC      |
| 5004  | 1493     | 1805    | -1,21 | 0,03843 | 0,420 | 200925_at    | Cytochrome c oxidase subunit VIa polypeptide 1               | COX6A1      |
| 4982  | 299      | 362     | -1,21 | 0,03822 | 0,419 | 211759_x_at  | Tubulin folding cofactor B                                   | TBCB        |
| 1897  | 10,3     | 12,5    | -1,21 | 0,01233 | 0,355 | 239484_at    | cDNA clone IMAGE:4795796                                     | -           |
| 3823  | 15,9     | 19,2    | -1,21 | 0,02790 | 0,399 | 242048_at    | Prefoldin subunit 6                                          | PF6         |
| 892   | 10,8     | 13,0    | -1,21 | 0,00516 | 0,313 | 220730_at    | Hypothetical protein FLJ12986                                | FLJ12986    |
| 4654  | 28,9     | 34,9    | -1,21 | 0,03515 | 0,413 | 221634_at    | Ribosomal protein L23a pseudogene 7                          | RPL23AP7    |
| 1275  | 23,2     | 28,0    | -1,21 | 0,00759 | 0,325 | 228419_at    | cDNA FLJ32491 fis, clone SKNSH1000308                        | -           |
| 4525  | 41,3     | 49,9    | -1,21 | 0,03414 | 0,412 | 203099_s_at  | Chromodomain protein, Y-like                                 | CDYL        |
| 267   | 8,65     | 10,4    | -1,21 | 0,00127 | 0,260 | 210659_at    | Chemokine-like receptor 1                                    | CMKLR1      |
| 3884  | 12,0     | 14,5    | -1,21 | 0,02836 | 0,399 | 205865_at    | AT rich interactive domain 3A (BRIGHT-like)                  | ARID3A      |
| 4843  | 22,4     | 27,0    | -1,21 | 0,03692 | 0,417 | 230334_at    | cDNA clone IMAGE:40078968                                    | -           |
| 678   | 19,3     | 23,3    | -1,21 | 0,00390 | 0,308 | 222648_at    | TBC1 domain family, member 16                                | TBC1D16     |
| 6066  | 19,9     | 24,0    | -1,21 | 0,04948 | 0,446 | 203036_s_at  | Metastasis suppressor 1                                      | MTSS1       |
| 3367  | 10,1     | 12,2    | -1,21 | 0,02392 | 0,388 | 234955_at    | Similar to Zinc-alpha-2-glycoprotein precursor               | LOC401393   |
| 1601  | 5,70     | 6,88    | -1,21 | 0,00998 | 0,341 | 222019_at    | Prefoldin subunit 6                                          | PF6         |
| 1489  | 495      | 597     | -1,21 | 0,00918 | 0,336 | 201527_at    | ATPase, H+ transporting, lysosomal 14kDa, V1 subunit F       | ATP6V1F     |
| 1277  | 4,22     | 5,09    | -1,21 | 0,00760 | 0,325 | 215149_at    | cDNA clone IMAGE:5260262                                     | -           |
| 5053  | 37,2     | 44,9    | -1,21 | 0,03893 | 0,420 | 218777_at    | Receptor accessory protein 4                                 | REEP4       |
| 3867  | 13,0     | 15,6    | -1,21 | 0,02824 | 0,399 | 228753_at    | Similar to XP_001148836.1                                    | -           |
| 2915  | 8,37     | 10,1    | -1,21 | 0,02047 | 0,383 | 240295_at    | Transcribed locus                                            | -           |
| 1504  | 176      | 212     | -1,21 | 0,00924 | 0,336 | 201050_at    | Phospholipase D family, member 3                             | PLD3        |
| 5021  | 10,8     | 13,0    | -1,21 | 0,03862 | 0,420 | 207697_x_at  | Leukocyte immunoglobulin-like receptor, subfamily B member 2 | LILRB2      |
| 546   | 30,8     | 37,1    | -1,20 | 0,00295 | 0,295 | 220036_s_at  | Limb region 1 homolog (mouse)-like                           | LMBR1L      |
| 20    | 5,29     | 6,37    | -1,20 | 0,00008 | 0,201 | 239198_at    | Enhancer of zeste homolog 1 (Drosophila)                     | EZH1        |
| 2579  | 11,3     | 13,6    | -1,20 | 0,01750 | 0,371 | 222087_at    | Pvt1 oncogene homolog, MYC activator (mouse)                 | PVT1        |
| 71    | 8,38     | 10,1    | -1,20 | 0,00028 | 0,201 | 1552887_at   | Chromosome 10 open reading frame 27                          | C10orf27    |
| 4620  | 12,5     | 15,0    | -1,20 | 0,03485 | 0,412 | 227342_s_at  | Myeloma overexpressed gene (hypothetical protein LOC26579)   | MYEOV       |
| 1882  | 31,2     | 37,6    | -1,20 | 0,01222 | 0,355 | 227907_at    | cDNA clone IMAGE:6470300                                     | -           |
| 3055  | 5,25     | 6,32    | -1,20 | 0,02152 | 0,385 | 204714_s_at  | Coagulation factor V (proaccelerin, labile factor)           | F5          |
| 4354  | 16,1     | 19,3    | -1,20 | 0,03241 | 0,407 | 213884_s_at  | Tripartite motif-containing 3                                | TRIM3       |
| 430   | 15,4     | 18,5    | -1,20 | 0,00227 | 0,288 | 211693_at    | Immunoglobulin heavy constant alpha 1                        | IGHA1       |
| 2847  | 8,43     | 10,1    | -1,20 | 0,01992 | 0,383 | 227704_at    | Chromosome 19 open reading frame 12                          | C19orf12    |
| 768   | 401      | 482     | -1,20 | 0,00437 | 0,311 | 223026_s_at  | Vacuolar protein sorting 29 homolog (S. cerevisiae)          | VPS29       |
| 2115  | 145      | 174     | -1,20 | 0,01387 | 0,359 | 222460_s_at  | NEFA-interacting nuclear protein NIP30                       | NIP30       |
| 5131  | 7,50     | 9,02    | -1,20 | 0,03949 | 0,421 | 207795_s_at  | Killer cell lectin-like receptor subfamily D, member 1       | KLRD1       |
| 402   | 10,2     | 12,2    | -1,20 | 0,00211 | 0,286 | 217017_at    | Oxysterol binding protein-like 10                            | OSBPL10     |
| 2993  | 19,2     | 23,1    | -1,20 | 0,02109 | 0,385 | 221293_s_at  | Differentially expressed in FDCP 6 homolog (mouse)           | DEF6        |
| 254   | 6,60     | 7,93    | -1,20 | 0,00118 | 0,254 | 221331_x_at  | Cytotoxic T-lymphocyte-associated protein 4                  | CTLA4       |
| 4983  | 15,0     | 18,1    | -1,20 | 0,03823 | 0,419 | 214957_at    | Actin-like 8                                                 | ACTL8       |
| 6078  | 15,0     | 18,0    | -1,20 | 0,04962 | 0,446 | 230139_at    | cDNA FLJ43345 fis, clone NT2RI3008228                        | -           |
| 3497  | 5,05     | 6,07    | -1,20 | 0,02514 | 0,392 | 232965_at    | Hypothetical gene supported by BC000922                      | LOC400684   |
| 2938  | 4,39     | 5,27    | -1,20 | 0,02060 | 0,383 | 235607_at    | Similar to Heterogeneous nuclear ribonucleoprotein D0        | -           |
| 3620  | 46,8     | 56,3    | -1,20 | 0,02614 | 0,395 | 219447_s_at  | Solute carrier family 35, member C2                          | SLC35C2     |
| 5659  | 7,52     | 9,03    | -1,20 | 0,04514 | 0,436 | 1562953_s_at | Chromosome 4 open reading frame 12                           | C4orf12     |
| 515   | 11,8     | 14,2    | -1,20 | 0,00275 | 0,291 | 224805_s_at  | Chromosome 15 open reading frame 17                          | C15orf17    |
| 2023  | 53,0     | 63,6    | -1,20 | 0,01320 | 0,355 | 225287_s_at  | Transmembrane protein 55B                                    | TMEM55B     |

| Index | Mutated* | Normal* | FC    | P value | FDR** | Probe set    | Description                                                             | Gene symbol      |
|-------|----------|---------|-------|---------|-------|--------------|-------------------------------------------------------------------------|------------------|
| 6003  | 21,9     | 26,2    | -1,20 | 0,04879 | 0,444 | 241792_x_at  | cDNA FLJ33355 fis, clone BRACE2005151                                   | -                |
| 3510  | 2053     | 2465    | -1,20 | 0,02522 | 0,392 | 213187_x_at  | Ferritin, light polypeptide                                             | <i>FTL</i>       |
| 2330  | 7,20     | 8,64    | -1,20 | 0,01553 | 0,364 | 215195_at    | Protein kinase C, alpha                                                 | <i>PRKCA</i>     |
| 4260  | 77,9     | 93,5    | -1,20 | 0,03166 | 0,406 | 217427_s_at  | HIR histone cell cycle regulation defective homolog A                   | <i>HIRA</i>      |
| 4481  | 8,01     | 9,61    | -1,20 | 0,03370 | 0,411 | 217486_s_at  | Zinc finger, DHHC-type containing 17                                    | <i>ZDHHC17</i>   |
| 5750  | 51,3     | 61,5    | -1,20 | 0,04614 | 0,439 | 1558304_s_at | tRNA splicing endonuclease 54 homolog ( <i>S. cerevisiae</i> )          | <i>TSEN54</i>    |
| 2668  | 20,7     | 24,9    | -1,20 | 0,01825 | 0,374 | 218939_at    | Leucine zipper-EF-hand containing transmembrane protein 1               | <i>LETM1</i>     |
| 1264  | 6,94     | 8,33    | -1,20 | 0,00752 | 0,325 | 235686_at    | Chromosome 2 open reading frame 60                                      | <i>C2orf60</i>   |
| 4253  | 15,3     | 18,3    | -1,20 | 0,03157 | 0,406 | 201808_s_at  | Endoglin (Osler-Rendu-Weber syndrome 1)                                 | <i>ENG</i>       |
| 4658  | 306      | 367     | -1,20 | 0,03518 | 0,413 | 201804_x_at  | Tubulin folding cofactor B                                              | <i>TBCB</i>      |
| 4689  | 201      | 241     | -1,20 | 0,03541 | 0,413 | 213404_s_at  | RAS homolog enriched in brain                                           | <i>RHEB</i>      |
| 2799  | 7,16     | 8,59    | -1,20 | 0,01944 | 0,380 | 219873_at    | Collectin sub-family member 11                                          | <i>COLEC11</i>   |
| 22    | 11,7     | 14,1    | -1,20 | 0,00009 | 0,201 | 219246_s_at  | 2-oxoglutarate and iron-dependent oxygenase domain-containing protein 2 | <i>OGFOD2</i>    |
| 1935  | 30,3     | 36,3    | -1,20 | 0,01261 | 0,355 | 215873_x_at  | ATP-binding cassette, sub-family C (CFTR/MRP), member 10                | <i>ABCC10</i>    |
| 4281  | 10,3     | 12,3    | -1,20 | 0,03181 | 0,406 | 229112_at    | Hypothetical protein LOC285813                                          | <i>LOC285813</i> |
| 1071  | 6,74     | 8,08    | -1,20 | 0,00628 | 0,319 | 234668_at    | cDNA FLJ23175 fis, clone LNG10438                                       | -                |
| 1557  | 7,39     | 8,85    | -1,20 | 0,00961 | 0,337 | 239366_at    | Transcribed locus                                                       | -                |
| 621   | 7,00     | 8,39    | -1,20 | 0,00352 | 0,308 | 240761_at    | Transcribed locus                                                       | -                |
| 4208  | 12,9     | 15,5    | -1,20 | 0,03111 | 0,404 | 205243_at    | Solute carrier family 13, member 3                                      | <i>SLC13A3</i>   |
| 2833  | 19,3     | 23,1    | -1,20 | 0,01977 | 0,381 | 203507_at    | CD68 molecule                                                           | <i>CD68</i>      |
| 709   | 3,56     | 4,27    | -1,20 | 0,00407 | 0,308 | 211006_s_at  | Potassium voltage-gated channel subfamily B member 1                    | <i>KCNB1</i>     |
| 804   | 4,30     | 5,15    | -1,20 | 0,00459 | 0,311 | 239588_s_at  | -                                                                       | -                |
| 151   | 5,07     | 6,07    | -1,20 | 0,00069 | 0,244 | 1552915_at   | Interleukin 28A (Interferon, lambda 2)                                  | <i>IL28A</i>     |
| 265   | 6,24     | 7,47    | -1,20 | 0,00126 | 0,260 | 207778_at    | Regenerating islet-derived 1 pseudogene                                 | <i>REGL</i>      |
| 4407  | 96,5     | 116     | -1,20 | 0,03290 | 0,408 | 222451_s_at  | Zinc finger, DHHC-type containing 9                                     | <i>ZDHHC9</i>    |
| 1691  | 15,7     | 18,8    | -1,20 | 0,01070 | 0,346 | 222304_x_at  | Olfactory receptor, family 7, subfamily E, member 47 pseudogene         | <i>OR7E47P</i>   |
| 1780  | 16,0     | 19,2    | -1,20 | 0,01135 | 0,349 | 226232_at    | cDNA FLJ33772 fis, clone BRSSN2000175                                   | -                |
| 718   | 11,4     | 13,6    | -1,20 | 0,00412 | 0,308 | 220671_at    | CCR4 carbon catabolite repression 4-like ( <i>S. cerevisiae</i> )       | <i>CCRN4L</i>    |
| 3558  | 35,7     | 42,7    | -1,20 | 0,02568 | 0,394 | 218907_s_at  | Leucine rich repeat containing 61                                       | <i>LRR61</i>     |
| 5057  | 14,1     | 16,9    | -1,20 | 0,03895 | 0,420 | 239324_at    | cDNA clone IMAGE:2960540                                                | -                |
| 611   | 13,8     | 16,5    | -1,20 | 0,00346 | 0,308 | 219907_at    | Fibroblast growth factor receptor substrate 3                           | <i>FRS3</i>      |
| 3717  | 80,1     | 95,8    | -1,20 | 0,02695 | 0,396 | 224735_at    | Cytochrome b, ascorbate dependent 3                                     | <i>CYBASC3</i>   |
| 2425  | 44,6     | 53,4    | -1,20 | 0,01622 | 0,365 | 204706_at    | Inositol polyphosphate-5-phosphatase, 72 kDa                            | <i>INPP5E</i>    |
| 5877  | 461      | 552     | -1,20 | 0,04749 | 0,442 | 205353_s_at  | Phosphatidylethanolamine binding protein 1                              | <i>PEBP1</i>     |
| 26    | 3,16     | 3,78    | -1,20 | 0,00012 | 0,201 | 1568656_at   | cDNA clone IMAGE:5265210                                                | -                |
| 3540  | 374      | 447     | -1,20 | 0,02547 | 0,393 | 224779_s_at  | Family with sequence similarity 96, member A                            | <i>FAM96A</i>    |
| 861   | 12,0     | 14,4    | -1,20 | 0,00497 | 0,313 | 210264_at    | G protein-coupled receptor 35                                           | <i>GPR35</i>     |
| 2215  | 5,36     | 6,41    | -1,20 | 0,01467 | 0,362 | 231025_at    | Transcribed locus                                                       | -                |
| 2713  | 6,77     | 8,10    | -1,20 | 0,01862 | 0,375 | 224399_at    | Programmed cell death 1 ligand 2                                        | <i>PDCD1LG2</i>  |
| 808   | 39,6     | 47,3    | -1,20 | 0,00461 | 0,311 | 220762_s_at  | Guanine nucleotide binding protein (G protein), beta polypeptide 1-like | <i>GNB1L</i>     |
| 3351  | 301      | 359     | -1,20 | 0,02380 | 0,388 | 226177_at    | Glycolipid transfer protein                                             | <i>GLTP</i>      |
| 3827  | 86,4     | 103     | -1,20 | 0,02793 | 0,399 | 215631_s_at  | Breast cancer metastasis suppressor 1                                   | <i>BRMS1</i>     |
| 3056  | 4,64     | 5,54    | -1,20 | 0,02152 | 0,385 | 239470_at    | Hypothetical protein LOC644809                                          | <i>FLJ38596</i>  |
| 4179  | 56,9     | 68,0    | -1,20 | 0,03089 | 0,404 | 205061_s_at  | Exosome component 9                                                     | <i>EXOSC9</i>    |
| 6033  | 26,2     | 31,3    | -1,19 | 0,04910 | 0,445 | 206351_s_at  | Peroxisome biogenesis factor 10                                         | <i>PEX10</i>     |
| 3903  | 14,6     | 17,5    | -1,19 | 0,02851 | 0,399 | 210821_x_at  | Centromere protein A                                                    | <i>CENPA</i>     |
| 2137  | 21,2     | 25,3    | -1,19 | 0,01405 | 0,359 | 64432_at     | Chromosome 12 open reading frame 47                                     | <i>C12orf47</i>  |
| 5435  | 9,41     | 11,2    | -1,19 | 0,04283 | 0,431 | 221640_s_at  | Leucine-rich repeats and death domain containing                        | <i>LRDD</i>      |
| 964   | 4,87     | 5,82    | -1,19 | 0,00559 | 0,315 | 239041_at    | Histone cluster 1, H2ak                                                 | <i>HIST1H2AK</i> |
| 3539  | 41,3     | 49,3    | -1,19 | 0,02547 | 0,393 | 1554721_a_at | Transcription initiation factor TFIID 150 kDa subunit                   | <i>TAF2</i>      |
| 1477  | 4,36     | 5,20    | -1,19 | 0,00905 | 0,335 | 232827_at    | Clone L50 polyadenylated HERV LTR sequence                              | -                |
| 3632  | 12,4     | 14,8    | -1,19 | 0,02626 | 0,395 | 207873_x_at  | Seizure related 6 homolog (mouse)-like                                  | <i>SEZ6L</i>     |
| 1625  | 32,0     | 38,2    | -1,19 | 0,01022 | 0,344 | 202879_s_at  | Pleckstrin homology, Sec7 and coiled-coil domains 1                     | <i>PSCD1</i>     |
| 3328  | 31,7     | 37,8    | -1,19 | 0,02363 | 0,388 | 227146_at    | Quiescin Q6 sulfhydryl oxidase 2                                        | <i>QSOX2</i>     |
| 42    | 4,19     | 5,00    | -1,19 | 0,00017 | 0,201 | 214248_s_at  | Tripartite motif-containing 2                                           | <i>TRIM2</i>     |
| 5913  | 272      | 324     | -1,19 | 0,04794 | 0,443 | 218462_at    | Brix domain containing 5                                                | <i>BXDC5</i>     |
| 595   | 39,9     | 47,6    | -1,19 | 0,00328 | 0,301 | 221686_s_at  | RecQ protein-like 5                                                     | <i>RECQL5</i>    |

| Index | Mutated* | Normal* | FC    | P value | FDR** | Probe set    | Description                                                    | Gene symbol     |
|-------|----------|---------|-------|---------|-------|--------------|----------------------------------------------------------------|-----------------|
| 3375  | 14,4     | 17,1    | -1,19 | 0,02402 | 0,389 | 212844_at    | Ribosomal RNA processing 1 homolog B ( <i>S. cerevisiae</i> )  | <i>RRP1B</i>    |
| 2112  | 362      | 432     | -1,19 | 0,01385 | 0,358 | 224129_s_at  | Dpy-30-like protein                                            | <i>HDPY-30</i>  |
| 5836  | 5,80     | 6,92    | -1,19 | 0,04715 | 0,442 | 240615_at    | cDNA FLJ34894 fis, clone NT2NE2017982                          | -               |
| 2916  | 4,76     | 5,68    | -1,19 | 0,02047 | 0,383 | 206004_at    | Transglutaminase 3                                             | <i>TGM3</i>     |
| 1422  | 20,6     | 24,6    | -1,19 | 0,00862 | 0,331 | 1564031_a_at | RELT-like 2                                                    | <i>RELL2</i>    |
| 5326  | 138      | 165     | -1,19 | 0,04163 | 0,427 | 202084_s_at  | SEC14-like 1 ( <i>S. cerevisiae</i> )                          | <i>SEC14L1</i>  |
| 948   | 42,2     | 50,3    | -1,19 | 0,00544 | 0,313 | 210225_x_at  | Leukocyte immunoglobulin-like receptor, subfamily B member 3   | <i>LILRB3</i>   |
| 5209  | 9,87     | 11,8    | -1,19 | 0,04020 | 0,422 | 231312_at    | Transcribed locus                                              | -               |
| 4856  | 4,82     | 5,75    | -1,19 | 0,03703 | 0,417 | 244074_at    | Full-length cDNA clone CS0DI026YO05                            | -               |
| 5493  | 5,75     | 6,85    | -1,19 | 0,04348 | 0,433 | 209776_s_at  | Solute carrier family 19, member 1                             | <i>SLC19A1</i>  |
| 2732  | 18,1     | 21,5    | -1,19 | 0,01884 | 0,377 | 204522_at    | Dom-3 homolog Z ( <i>C. elegans</i> )                          | <i>DOM3Z</i>    |
| 5814  | 15,8     | 18,8    | -1,19 | 0,04698 | 0,442 | 206818_s_at  | Cyclin M2                                                      | <i>CNNM2</i>    |
| 233   | 6,48     | 7,71    | -1,19 | 0,00108 | 0,250 | 1554367_at   | Family with sequence similarity 26, member C                   | <i>FAM26C</i>   |
| 3645  | 7,12     | 8,48    | -1,19 | 0,02634 | 0,395 | 228395_at    | Glycosyltransferase 8 domain containing 1                      | <i>GLT8D1</i>   |
| 1947  | 17,7     | 21,1    | -1,19 | 0,01272 | 0,355 | 203977_at    | Tafazzin                                                       | <i>TAZ</i>      |
| 4280  | 12,9     | 15,4    | -1,19 | 0,03180 | 0,406 | 241427_x_at  | cDNA DKFZP434I0714                                             | -               |
| 841   | 7,89     | 9,40    | -1,19 | 0,00482 | 0,313 | 1557532_at   | NADH-ubiquinone oxidoreductase subunit B14.5a                  | <i>NDUFA7</i>   |
| 2536  | 6,43     | 7,65    | -1,19 | 0,01715 | 0,369 | 227321_at    | Opposite strand transcription unit to STAG3                    | <i>GATS</i>     |
| 4499  | 8,71     | 10,4    | -1,19 | 0,03384 | 0,411 | 216253_s_at  | Parvin, beta                                                   | <i>PARVB</i>    |
| 4714  | 47,5     | 56,6    | -1,19 | 0,03567 | 0,413 | 213473_at    | BRCA1 associated protein                                       | <i>BRAP</i>     |
| 4248  | 14,0     | 16,6    | -1,19 | 0,03154 | 0,406 | 241839_at    | Transcribed locus                                              | -               |
| 260   | 18,4     | 21,9    | -1,19 | 0,00123 | 0,257 | 1566775_at   | Dynein, axonemal, heavy chain 1                                | <i>DNAH1</i>    |
| 3032  | 13,2     | 15,8    | -1,19 | 0,02137 | 0,385 | 227965_at    | Full-length cDNA clone CS0DJ011YE02                            | -               |
| 2611  | 6,53     | 7,77    | -1,19 | 0,01773 | 0,371 | 229052_at    | Ankyrin repeat domain 39                                       | <i>ANKRD39</i>  |
| 1558  | 23,4     | 27,8    | -1,19 | 0,00964 | 0,338 | 230062_at    | KIAA1666 protein                                               | <i>KIAA1666</i> |
| 3793  | 7,07     | 8,41    | -1,19 | 0,02762 | 0,398 | 228646_at    | Protein phosphatase 1, regulatory (inhibitor) subunit 1C       | <i>PPP1R1C</i>  |
| 1168  | 7,70     | 9,16    | -1,19 | 0,00687 | 0,321 | 1568706_s_at | Advillin                                                       | <i>AVIL</i>     |
| 3838  | 12,4     | 14,8    | -1,19 | 0,02804 | 0,399 | 210008_s_at  | Mitochondrial ribosomal protein S12                            | <i>MRPS12</i>   |
| 1977  | 3,09     | 3,67    | -1,19 | 0,01291 | 0,355 | 1556776_a_at | Full length insert cDNA YN57B01                                | -               |
| 5459  | 357      | 424     | -1,19 | 0,04312 | 0,432 | 201013_s_at  | Multifunctional protein ADE2                                   | <i>PAICS</i>    |
| 5479  | 16,4     | 19,5    | -1,19 | 0,04335 | 0,433 | 235359_at    | Leucine rich repeat containing 33                              | <i>LRRC33</i>   |
| 3105  | 7,43     | 8,84    | -1,19 | 0,02192 | 0,386 | 226205_at    | Ankyrin repeat domain 13 family, member D                      | <i>ANKRD13D</i> |
| 3200  | 13,8     | 16,3    | -1,19 | 0,02266 | 0,387 | 211894_x_at  | Seizure related 6 homolog (mouse)-like                         | <i>SEZ6L</i>    |
| 6021  | 78,9     | 93,8    | -1,19 | 0,04901 | 0,445 | 224807_at    | GRAM domain containing 1A                                      | <i>GRAMD1A</i>  |
| 5123  | 28,6     | 34,0    | -1,19 | 0,03944 | 0,421 | 225094_at    | SET domain containing (lysine methyltransferase) 8             | <i>SETD8</i>    |
| 882   | 6,50     | 7,73    | -1,19 | 0,00510 | 0,313 | 221336_at    | Atonal homolog 1 ( <i>Drosophila</i> )                         | <i>ATOH1</i>    |
| 914   | 10,4     | 12,4    | -1,19 | 0,00526 | 0,313 | 1552348_at   | Protease, serine, 33                                           | <i>PRSS33</i>   |
| 5928  | 12,5     | 14,8    | -1,19 | 0,04804 | 0,443 | 211082_x_at  | MAP/microtubule affinity-regulating kinase 2                   | <i>MARK2</i>    |
| 2687  | 12,0     | 14,3    | -1,19 | 0,01841 | 0,375 | 207671_s_at  | Bestrophin 1                                                   | <i>BEST1</i>    |
| 2081  | 9,73     | 11,6    | -1,19 | 0,01358 | 0,356 | 1553540_a_at | Solute carrier family 29, member 2                             | <i>SLC29A2</i>  |
| 108   | 7,41     | 8,81    | -1,19 | 0,00043 | 0,217 | 223779_at    | Hypothetical protein MGC10981                                  | <i>MGC10981</i> |
| 5861  | 11,4     | 13,5    | -1,19 | 0,04739 | 0,442 | 207509_s_at  | Leukocyte-associated immunoglobulin-like receptor 2            | <i>LAIR2</i>    |
| 3444  | 17,5     | 20,7    | -1,19 | 0,02465 | 0,391 | 229612_at    | Transcribed locus                                              | -               |
| 4787  | 30,6     | 36,4    | -1,19 | 0,03631 | 0,415 | 221809_at    | RAN binding protein 10                                         | <i>RANBP10</i>  |
| 156   | 9,15     | 10,9    | -1,19 | 0,00071 | 0,244 | 206938_at    | Steroid-5-alpha-reductase, alpha polypeptide 2                 | <i>SRD5A2</i>   |
| 2842  | 4,25     | 5,05    | -1,19 | 0,01987 | 0,382 | 230776_at    | cDNA FLJ36181 fis, clone TESTI2026794                          | -               |
| 2274  | 5,73     | 6,81    | -1,19 | 0,01511 | 0,363 | 1559509_at   | cDNA FLJ35328 fis, clone PROST2013531                          | -               |
| 335   | 5,18     | 6,15    | -1,19 | 0,00170 | 0,277 | 220437_at    | Hepatocellular carcinoma-associated gene TD26                  | <i>LOC55908</i> |
| 2340  | 247      | 293     | -1,19 | 0,01562 | 0,364 | 221984_s_at  | Family with sequence similarity 134, member A                  | <i>FAM134A</i>  |
| 1108  | 10,1     | 12,0    | -1,19 | 0,00649 | 0,319 | 211096_at    | Pre-B-cell leukemia homeobox 2                                 | <i>PBX2</i>     |
| 1614  | 82,3     | 97,6    | -1,19 | 0,01012 | 0,343 | 202264_s_at  | Translocase of outer mitochondrial membrane 40 homolog (yeast) | <i>TOMM40</i>   |
| 3323  | 11,7     | 13,9    | -1,19 | 0,02360 | 0,388 | 232476_at    | cDNA FLJ21452 fis, clone COL04505                              | -               |
| 5980  | 170      | 202     | -1,19 | 0,04856 | 0,444 | 224615_x_at  | Histocompatibility (minor) 13                                  | <i>HM13</i>     |
| 3409  | 23,0     | 27,3    | -1,19 | 0,02433 | 0,390 | 211037_s_at  | Leukocyte receptor cluster (LRC) member 4                      | <i>LENG4</i>    |
| 4028  | 9,28     | 11,0    | -1,19 | 0,02951 | 0,400 | 215989_at    | Chromobox homolog 2 (Pc class homolog, <i>Drosophila</i> )     | <i>CBX2</i>     |
| 509   | 18,2     | 21,6    | -1,19 | 0,00269 | 0,289 | 233939_at    | REX1, RNA exonuclease 1 homolog ( <i>S. cerevisiae</i> )       | <i>REXO1</i>    |
| 2633  | 97,3     | 115     | -1,19 | 0,01793 | 0,372 | 201933_at    | Chromatin modifying protein 1A                                 | <i>CHMP1A</i>   |

| Index | Mutated* | Normal* | FC    | P value | FDR** | Probe set   | Description                                                | Gene symbol     |
|-------|----------|---------|-------|---------|-------|-------------|------------------------------------------------------------|-----------------|
| 5190  | 16,5     | 19,6    | -1,19 | 0,03998 | 0,421 | 2028_s_at   | E2F transcription factor 1                                 | <i>E2F1</i>     |
| 2331  | 45,5     | 54,0    | -1,19 | 0,01556 | 0,364 | 1552473_at  | Guanidinoacetate N-methyltransferase                       | <i>GAMT</i>     |
| 5663  | 175      | 207     | -1,19 | 0,04519 | 0,436 | 209786_at   | High mobility group nucleosomal binding domain 4           | <i>HMGN4</i>    |
| 4989  | 9,57     | 11,3    | -1,19 | 0,03829 | 0,419 | 235528_at   | Guanylate cyclase activator 1B (retina)                    | <i>GUCA1B</i>   |
| 1175  | 3,41     | 4,04    | -1,18 | 0,00690 | 0,321 | 207793_s_at | Erythrocyte membrane protein band 4.1                      | <i>EPB41</i>    |
| 338   | 6,56     | 7,77    | -1,18 | 0,00173 | 0,277 | 232320_at   | cDNA FLJ22706 fis, clone HSI13163                          | -               |
| 4283  | 19,2     | 22,7    | -1,18 | 0,03182 | 0,406 | 219817_at   | Chromosome 12 open reading frame 47                        | <i>C12orf47</i> |
| 2992  | 26,1     | 30,9    | -1,18 | 0,02105 | 0,385 | 227633_at   | RAS homolog enriched in brain                              | <i>RHEB</i>     |
| 3528  | 5,48     | 6,48    | -1,18 | 0,02535 | 0,393 | 239016_at   | Transcribed locus                                          | -               |
| 5330  | 22,8     | 27,0    | -1,18 | 0,04169 | 0,428 | 225476_at   | HLA-B associated transcript 4                              | <i>BAT4</i>     |
| 3230  | 9,28     | 11,0    | -1,18 | 0,02291 | 0,388 | 229855_at   | Ring finger protein 34                                     | <i>RNF34</i>    |
| 1966  | 23,5     | 27,9    | -1,18 | 0,01285 | 0,355 | 213402_at   | Zinc finger protein 787                                    | <i>ZNF787</i>   |
| 2240  | 9,04     | 10,7    | -1,18 | 0,01489 | 0,363 | 238072_at   | cDNA FLJ38016 fis, clone CTONG2012724                      | -               |
| 5144  | 4,97     | 5,89    | -1,18 | 0,03961 | 0,421 | 240869_at   | Full length insert cDNA clone ZE05A03                      | -               |
| 684   | 22,6     | 26,8    | -1,18 | 0,00392 | 0,308 | 209957_s_at | Natriuretic peptide precursor A                            | <i>NPPA</i>     |
| 689   | 10,9     | 12,9    | -1,18 | 0,00395 | 0,308 | 232922_s_at | Chromosome 20 open reading frame 59                        | <i>C20orf59</i> |
| 836   | 18,1     | 21,4    | -1,18 | 0,00478 | 0,312 | 211173_at   | Cholecystokinin A receptor                                 | <i>CCKAR</i>    |
| 833   | 4,96     | 5,87    | -1,18 | 0,00476 | 0,312 | 1555377_at  | Olfactory receptor, family 4, subfamily D, member 2        | <i>OR4D2</i>    |
| 306   | 5,36     | 6,34    | -1,18 | 0,00148 | 0,263 | 237827_at   | -                                                          | -               |
| 5411  | 50,3     | 59,6    | -1,18 | 0,04251 | 0,430 | 229758_at   | Tigger transposable element derived 5                      | <i>TIGD5</i>    |
| 2012  | 12,4     | 14,7    | -1,18 | 0,01311 | 0,355 | 205575_at   | Complement component 1, q subcomponent-like 1              | <i>C1QL1</i>    |
| 78    | 7,13     | 8,44    | -1,18 | 0,00030 | 0,201 | 224001_at   | Family with sequence similarity 135, member B              | <i>FAM135B</i>  |
| 5993  | 5,43     | 6,43    | -1,18 | 0,04874 | 0,444 | 223573_s_at | Protein phosphatase 2A1 B gamma subunit                    | <i>PPP2R2C</i>  |
| 3585  | 4,14     | 4,90    | -1,18 | 0,02588 | 0,394 | 211303_x_at | Growth-inhibiting protein 26                               | <i>PSMAL</i>    |
| 1941  | 28,3     | 33,5    | -1,18 | 0,01266 | 0,355 | 237257_at   | RAB4B, member RAS oncogene family                          | <i>RAB4B</i>    |
| 301   | 28,4     | 33,6    | -1,18 | 0,00146 | 0,263 | 220659_s_at | Chromosome 7 open reading frame 43                         | <i>C7orf43</i>  |
| 604   | 4,81     | 5,69    | -1,18 | 0,00335 | 0,303 | 216065_at   | Similar to XP_530916.1                                     | -               |
| 5715  | 293      | 346     | -1,18 | 0,04575 | 0,438 | 208799_at   | Proteasome (prosome, macropain) subunit, beta type, 5      | <i>PSMB5</i>    |
| 2773  | 17,7     | 20,9    | -1,18 | 0,01924 | 0,379 | 229864_at   | Transmembrane protein 103                                  | <i>TMEM103</i>  |
| 5329  | 11,1     | 13,2    | -1,18 | 0,04167 | 0,428 | 237186_at   | cDNA DKFZp779F2345                                         | -               |
| 3468  | 10,2     | 12,0    | -1,18 | 0,02485 | 0,392 | 235194_at   | Two pore segment channel 2                                 | <i>TPCN2</i>    |
| 1740  | 11,9     | 14,1    | -1,18 | 0,01111 | 0,348 | 219996_at   | Ankyrin repeat and SOCS box-containing 7                   | <i>ASB7</i>     |
| 4692  | 23,5     | 27,8    | -1,18 | 0,03544 | 0,413 | 228405_at   | Rhopilin, Rho GTPase binding protein 1                     | <i>RHPN1</i>    |
| 674   | 16,1     | 19,0    | -1,18 | 0,00386 | 0,308 | 229637_at   | Synembryn-B                                                | <i>RIC8B</i>    |
| 5139  | 7,49     | 8,85    | -1,18 | 0,03958 | 0,421 | 237220_at   | Transcribed locus                                          | -               |
| 1548  | 7,21     | 8,52    | -1,18 | 0,00956 | 0,337 | 220130_x_at | Leukotriene B4 receptor 2                                  | <i>LTB4R2</i>   |
| 2497  | 29,6     | 34,9    | -1,18 | 0,01682 | 0,367 | 1554050_at  | Sphingomyelin phosphodiesterase, acid-like 3B              | <i>SMPDL3B</i>  |
| 2717  | 27,1     | 32,0    | -1,18 | 0,01867 | 0,376 | 213098_at   | RCD1 required for cell differentiation1 homolog (S. pombe) | <i>RQCD1</i>    |
| 243   | 4,37     | 5,16    | -1,18 | 0,00111 | 0,250 | 215882_at   | Centrosomal protein 152kDa                                 | <i>CEP152</i>   |
| 2935  | 24,8     | 29,2    | -1,18 | 0,02059 | 0,383 | 1570402_at  | Kinesin light chain 3                                      | <i>KLC3</i>     |
| 1171  | 7,72     | 9,12    | -1,18 | 0,00688 | 0,321 | 241644_at   | BolA homolog 2 (E. coli)                                   | <i>BOLA2</i>    |
| 4985  | 25,9     | 30,6    | -1,18 | 0,03826 | 0,419 | 223055_s_at | Exportin 5                                                 | <i>XPO5</i>     |
| 5868  | 76,2     | 89,9    | -1,18 | 0,04743 | 0,442 | 202281_at   | Cyclin G associated kinase                                 | <i>GAK</i>      |
| 569   | 15,2     | 18,0    | -1,18 | 0,00311 | 0,299 | 236863_at   | Chromosome 17 open reading frame 67                        | <i>C17orf67</i> |
| 37    | 28,2     | 33,3    | -1,18 | 0,00015 | 0,201 | 216678_at   | Intraflagellar transport 122 homolog (Chlamydomonas)       | <i>IFT122</i>   |
| 121   | 3914     | 4618    | -1,18 | 0,00056 | 0,240 | 200062_s_at | Ribosomal protein L30                                      | <i>RPL30</i>    |
| 3736  | 62,7     | 74,0    | -1,18 | 0,02713 | 0,397 | 221821_s_at | Chromosome 12 open reading frame 41                        | <i>C12orf41</i> |
| 4636  | 4,14     | 4,88    | -1,18 | 0,03497 | 0,412 | 217651_at   | Transcribed locus                                          | -               |
| 6079  | 4,52     | 5,33    | -1,18 | 0,04963 | 0,446 | 1569190_at  | Sodium channel and clathrin linker 1                       | <i>SCLT1</i>    |
| 188   | 115      | 135     | -1,18 | 0,00087 | 0,244 | 200070_at   | Chromosome 2 open reading frame 24                         | <i>C2orf24</i>  |
| 1860  | 8,51     | 10,0    | -1,18 | 0,01199 | 0,353 | 228912_at   | Villin 1                                                   | <i>VIL1</i>     |
| 165   | 19,6     | 23,1    | -1,18 | 0,00076 | 0,244 | 237367_x_at | CASP8 and FADD-like apoptosis regulator                    | <i>CFLAR</i>    |
| 1898  | 20,2     | 23,8    | -1,18 | 0,01234 | 0,355 | 202571_s_at | Discs, large (Drosophila) homolog-associated protein 4     | <i>DLGAP4</i>   |
| 5816  | 586      | 691     | -1,18 | 0,04698 | 0,442 | 202857_at   | Transmembrane protein 4                                    | <i>TMEM4</i>    |
| 2317  | 20,5     | 24,1    | -1,18 | 0,01539 | 0,363 | 224079_at   | Interleukin 17C                                            | <i>IL17C</i>    |
| 4862  | 951      | 1120    | -1,18 | 0,03710 | 0,417 | 208628_s_at | Y box binding protein 1                                    | <i>YBX1</i>     |
| 1718  | 65,7     | 77,4    | -1,18 | 0,01101 | 0,348 | 225789_at   | Centaurin, gamma 3                                         | <i>CENTG3</i>   |

| Index | Mutated* | Normal* | FC    | P value | FDR** | Probe set    | Description                                                         | Gene symbol      |
|-------|----------|---------|-------|---------|-------|--------------|---------------------------------------------------------------------|------------------|
| 3289  | 40,3     | 47,5    | -1,18 | 0,02342 | 0,388 | 225437_s_at  | Chromosome 7 open reading frame 27                                  | <i>C7orf27</i>   |
| 351   | 4,02     | 4,74    | -1,18 | 0,00179 | 0,278 | 224004_at    | Zinc finger protein 226                                             | <i>ZNF226</i>    |
| 1253  | 16,0     | 18,8    | -1,18 | 0,00746 | 0,325 | 239592_at    | Transcribed locus                                                   | -                |
| 2934  | 43,1     | 50,8    | -1,18 | 0,02058 | 0,383 | 219611_s_at  | Coiled-coil domain containing 21                                    | <i>CCDC21</i>    |
| 2794  | 48,8     | 57,5    | -1,18 | 0,01942 | 0,380 | 1564208_x_at | Hypothetical protein FLJ35390                                       | <i>FLJ35390</i>  |
| 1829  | 6,88     | 8,10    | -1,18 | 0,01179 | 0,351 | 1559064_at   | Nucleoporin 153kDa                                                  | <i>NUP153</i>    |
| 1867  | 26,6     | 31,4    | -1,18 | 0,01206 | 0,353 | 211135_x_at  | Leukocyte immunoglobulin-like receptor, subfamily B member 3        | <i>LILRB3</i>    |
| 1124  | 386      | 455     | -1,18 | 0,00657 | 0,319 | 211036_x_at  | Anaphase promoting complex subunit 5                                | <i>ANAPC5</i>    |
| 3059  | 5,15     | 6,06    | -1,18 | 0,02153 | 0,385 | 220448_at    | Potassium channel, subfamily K, member 12                           | <i>KCNK12</i>    |
| 659   | 17,5     | 20,6    | -1,18 | 0,00382 | 0,308 | 217324_at    | cDNA DKFZp434B1521                                                  | -                |
| 2574  | 38,2     | 45,0    | -1,18 | 0,01745 | 0,371 | 216008_s_at  | Ariadne homolog 2 (Drosophila)                                      | <i>ARIH2</i>     |
| 59    | 3,71     | 4,37    | -1,18 | 0,00022 | 0,201 | 241654_at    | Transcribed locus                                                   | -                |
| 897   | 11,9     | 14,0    | -1,18 | 0,00519 | 0,313 | 222094_at    | Sulfotransferase family, cytosolic, 1A, phenol-preferring, member 3 | <i>SULT1A3</i>   |
| 5852  | 24,2     | 28,5    | -1,18 | 0,04733 | 0,442 | 53987_at     | RAN binding protein 10                                              | <i>RANBP10</i>   |
| 2254  | 40,1     | 47,3    | -1,18 | 0,01500 | 0,363 | 219149_x_at  | Debranching enzyme homolog 1 ( <i>S. cerevisiae</i> )               | <i>DBR1</i>      |
| 2339  | 7,31     | 8,60    | -1,18 | 0,01561 | 0,364 | 230847_at    | Werner helicase interacting protein 1                               | <i>WRNIP1</i>    |
| 1247  | 19,1     | 22,5    | -1,18 | 0,00741 | 0,324 | 207408_at    | Solute carrier family 22, member 14                                 | <i>SLC22A14</i>  |
| 525   | 3,89     | 4,58    | -1,18 | 0,00280 | 0,291 | 1553533_at   | Junctophilin 1                                                      | <i>JPH1</i>      |
| 956   | 4,11     | 4,83    | -1,18 | 0,00552 | 0,315 | 243804_at    | Myotubularin related protein 7                                      | <i>MTMR7</i>     |
| 2747  | 8,20     | 9,65    | -1,18 | 0,01900 | 0,378 | 1554095_at   | RNA binding motif protein 33                                        | <i>RBM33</i>     |
| 931   | 23,9     | 28,1    | -1,18 | 0,00535 | 0,313 | 211773_s_at  | Zinc finger with KRAB and SCAN domains 3                            | <i>ZKSCAN3</i>   |
| 1498  | 12,7     | 15,0    | -1,18 | 0,00922 | 0,336 | 223812_at    | Hypothetical protein LOC51252                                       | <i>LOC51252</i>  |
| 727   | 5,74     | 6,75    | -1,18 | 0,00415 | 0,308 | 244709_at    | Clone IMAGE:5200887, mRNA                                           | -                |
| 5632  | 14,7     | 17,3    | -1,18 | 0,04496 | 0,436 | 240379_at    | Transcribed locus                                                   | -                |
| 74    | 4,88     | 5,74    | -1,18 | 0,00028 | 0,201 | 206843_at    | Crystallin, beta A4                                                 | <i>CRYBA4</i>    |
| 1582  | 118      | 139     | -1,18 | 0,00985 | 0,340 | 218037_at    | Family with sequence similarity 134, member A                       | <i>FAM134A</i>   |
| 5399  | 110      | 130     | -1,18 | 0,04234 | 0,429 | 218126_at    | Family with sequence similarity 82, member C                        | <i>FAM82C</i>    |
| 2959  | 6,53     | 7,68    | -1,18 | 0,02079 | 0,384 | 242618_at    | Tripartite motif-containing 26                                      | <i>TRIM26</i>    |
| 4241  | 10,9     | 12,8    | -1,18 | 0,03148 | 0,406 | 238226_at    | Family with sequence similarity 70, member B                        | <i>FAM70B</i>    |
| 2162  | 5,16     | 6,06    | -1,18 | 0,01429 | 0,361 | 235992_s_at  | Hypothetical protein LOC606495                                      | <i>LOC606495</i> |
| 4863  | 6,68     | 7,85    | -1,18 | 0,03710 | 0,417 | 1561595_x_at | Full length insert cDNA YN57B01                                     | -                |
| 508   | 4,39     | 5,16    | -1,18 | 0,00269 | 0,289 | 211614_at    | C33.6 unnamed HERV-H protein                                        | -                |
| 5664  | 26,7     | 31,4    | -1,18 | 0,04519 | 0,436 | 212735_at    | KIAA0226 protein                                                    | <i>KIAA0226</i>  |
| 1319  | 15,8     | 18,6    | -1,18 | 0,00786 | 0,326 | 242885_at    | -                                                                   | -                |
| 1555  | 8,53     | 10,0    | -1,18 | 0,00960 | 0,337 | 1559121_s_at | Ariadne homolog 2 (Drosophila)                                      | <i>ARIH2</i>     |
| 4682  | 7,60     | 8,93    | -1,18 | 0,03535 | 0,413 | 243680_at    | Similar to XP_001152474.1                                           | -                |
| 3624  | 44,6     | 52,4    | -1,18 | 0,02616 | 0,395 | 212059_s_at  | TNF-receptor ubiquitous scaffolding/signaling protein               | <i>TRPC4AP</i>   |
| 5415  | 18,7     | 21,9    | -1,17 | 0,04256 | 0,430 | 204795_at    | Proline rich 3                                                      | <i>PRR3</i>      |
| 3326  | 6,55     | 7,69    | -1,17 | 0,02362 | 0,388 | 220692_at    | HSPC047 protein                                                     | -                |
| 2651  | 10,1     | 11,9    | -1,17 | 0,01808 | 0,373 | 243774_at    | Mucin 20, cell surface associated                                   | <i>MUC20</i>     |
| 4964  | 15,2     | 17,9    | -1,17 | 0,03808 | 0,419 | 244765_at    | Transcribed locus                                                   | -                |
| 1768  | 28,7     | 33,7    | -1,17 | 0,01127 | 0,348 | 208947_s_at  | UPF1 regulator of nonsense transcripts homolog (yeast)              | <i>UPF1</i>      |
| 3725  | 4,83     | 5,67    | -1,17 | 0,02704 | 0,397 | 1554356_at   | GINS complex subunit 4 (Sld5 homolog)                               | <i>GINS4</i>     |
| 5353  | 903      | 1061    | -1,17 | 0,04200 | 0,429 | 221619_s_at  | Mitochondrial carrier homolog 1 ( <i>C. elegans</i> )               | <i>MTCH1</i>     |
| 1670  | 6,52     | 7,66    | -1,17 | 0,01054 | 0,345 | 220961_s_at  | Transforming growth factor beta regulator 4                         | <i>TBRG4</i>     |
| 2057  | 13,2     | 15,5    | -1,17 | 0,01340 | 0,356 | 206650_at    | IQ motif containing C                                               | <i>IQCC</i>      |
| 4900  | 6,57     | 7,71    | -1,17 | 0,03749 | 0,418 | 210359_at    | Metastasis suppressor 1                                             | <i>MTSS1</i>     |
| 927   | 36,3     | 42,6    | -1,17 | 0,00533 | 0,313 | 210651_s_at  | EPH receptor B2                                                     | <i>EPHB2</i>     |
| 2070  | 4,63     | 5,44    | -1,17 | 0,01353 | 0,356 | 1555868_at   | Hypothetical protein LOC729070                                      | <i>LOC729070</i> |
| 5318  | 60,0     | 70,5    | -1,17 | 0,04151 | 0,427 | 219022_at    | Chromosome 12 open reading frame 43                                 | <i>C12orf43</i>  |
| 4356  | 6,07     | 7,13    | -1,17 | 0,03241 | 0,407 | 227844_at    | Formin-like 3                                                       | <i>FMNL3</i>     |
| 1381  | 6,48     | 7,61    | -1,17 | 0,00831 | 0,329 | 240257_at    | Synaptojanin 2                                                      | <i>SYNJ2</i>     |
| 3852  | 18,1     | 21,3    | -1,17 | 0,02814 | 0,399 | 212618_at    | Zinc finger protein 609                                             | <i>ZNF609</i>    |
| 178   | 6,04     | 7,09    | -1,17 | 0,00082 | 0,244 | 1560410_at   | Clone IMAGE:5241870, mRNA sequence                                  | -                |
| 5334  | 6,88     | 8,07    | -1,17 | 0,04176 | 0,428 | 216150_at    | cDNA FLJ11547 fis, clone HEMBA1002934                               | -                |
| 2795  | 22,2     | 26,1    | -1,17 | 0,01943 | 0,380 | 224064_s_at  | Dehydrolipoyl diphosphate synthase                                  | <i>DHDDS</i>     |
| 4340  | 47,5     | 55,7    | -1,17 | 0,03233 | 0,407 | 228257_at    | Ankyrin repeat domain 52                                            | <i>ANKRD52</i>   |

| Index | Mutated* | Normal* | FC    | P value | FDR** | Probe set    | Description                                                | Gene symbol      |
|-------|----------|---------|-------|---------|-------|--------------|------------------------------------------------------------|------------------|
| 2826  | 6,73     | 7,89    | -1,17 | 0,01973 | 0,381 | 231232_at    | Transcribed locus                                          | -                |
| 5082  | 31,6     | 37,1    | -1,17 | 0,03911 | 0,420 | 235181_at    | Chromosome 2 open reading frame 60                         | <i>C2orf60</i>   |
| 31    | 4,09     | 4,79    | -1,17 | 0,00014 | 0,201 | 219724_s_at  | KIAA0748 protein                                           | <i>KIAA0748</i>  |
| 3202  | 72,9     | 85,5    | -1,17 | 0,02268 | 0,387 | 1554093_a_at | Small nuclear RNA activating complex, polypeptide 5, 19kDa | <i>SNAPC5</i>    |
| 1913  | 9,70     | 11,4    | -1,17 | 0,01247 | 0,355 | 210100_s_at  | ATP-binding cassette, sub-family A (ABC1), member 2        | <i>ABCA2</i>     |
| 5444  | 25,0     | 29,3    | -1,17 | 0,04294 | 0,431 | 1556340_at   | Mitogen-activated protein kinase 12                        | <i>MAPK12</i>    |
| 6092  | 33,4     | 39,2    | -1,17 | 0,04973 | 0,446 | 44065_at     | Chromosome 12 open reading frame 52                        | <i>C12orf52</i>  |
| 5935  | 9,29     | 10,9    | -1,17 | 0,04812 | 0,443 | 205881_at    | Zinc finger protein 74                                     | <i>ZNF74</i>     |
| 1391  | 12,1     | 14,2    | -1,17 | 0,00841 | 0,330 | 240443_at    | Transcribed locus                                          | -                |
| 2694  | 109      | 127     | -1,17 | 0,01848 | 0,375 | 232209_x_at  | Histocompatibility (minor) 13                              | <i>HM13</i>      |
| 5972  | 21,5     | 25,2    | -1,17 | 0,04849 | 0,444 | 213615_at    | Membrane bound O-acyltransferase domain containing 5       | <i>MBOAT5</i>    |
| 5118  | 119      | 139     | -1,17 | 0,03940 | 0,421 | 212034_s_at  | Exocyst complex component 7                                | <i>EXOC7</i>     |
| 3862  | 13,1     | 15,4    | -1,17 | 0,02822 | 0,399 | 228522_at    | Hypothetical protein LOC642031                             | <i>LOC642031</i> |
| 417   | 22,0     | 25,8    | -1,17 | 0,00219 | 0,286 | 209588_at    | EPH receptor B2                                            | <i>EPHB2</i>     |
| 2051  | 9,44     | 11,1    | -1,17 | 0,01333 | 0,355 | 217349_s_at  | LIM domain only 6                                          | <i>LMO6</i>      |
| 4998  | 18,7     | 21,9    | -1,17 | 0,03839 | 0,420 | 232106_s_at  | Coiled-coil domain containing 123                          | <i>CCDC123</i>   |
| 237   | 548      | 642     | -1,17 | 0,00110 | 0,250 | 208736_at    | Actin related protein 2/3 complex, subunit 3, 21kDa        | <i>ARPC3</i>     |
| 895   | 3,40     | 3,98    | -1,17 | 0,00518 | 0,313 | 238361_s_at  | Transcribed locus                                          | -                |
| 4255  | 7,20     | 8,43    | -1,17 | 0,03161 | 0,406 | 237611_at    | Transcribed locus                                          | -                |
| 5906  | 104      | 122     | -1,17 | 0,04785 | 0,443 | 219162_s_at  | Mitochondrial ribosomal protein L11                        | <i>MRPL11</i>    |
| 932   | 17,0     | 20,0    | -1,17 | 0,00536 | 0,313 | 1568718_at   | Chromosome 6 open reading frame 85                         | <i>C6orf85</i>   |
| 5511  | 14,0     | 16,4    | -1,17 | 0,04366 | 0,433 | 216047_x_at  | Seizure related 6 homolog (mouse)-like                     | <i>SEZ6L</i>     |
| 2473  | 6,19     | 7,25    | -1,17 | 0,01662 | 0,367 | 208059_at    | Chemokine (C-C motif) receptor 8                           | <i>CCR8</i>      |
| 496   | 6,15     | 7,20    | -1,17 | 0,00265 | 0,289 | 1559754_at   | Lymphotoxin beta (TNF superfamily, member 3)               | <i>LTB</i>       |
| 1402  | 4,67     | 5,47    | -1,17 | 0,00847 | 0,330 | 243220_at    | Transcribed locus                                          | -                |
| 2786  | 18,2     | 21,4    | -1,17 | 0,01935 | 0,380 | 238627_at    | Trafficking protein particle complex 2-like                | <i>TRAPP2L</i>   |
| 3264  | 104      | 121     | -1,17 | 0,02317 | 0,388 | 223420_at    | DnaJ (Hsp40) homolog, subfamily C, member 14               | <i>DNAJC14</i>   |
| 460   | 9,63     | 11,3    | -1,17 | 0,00245 | 0,288 | 231637_at    | Transcribed locus                                          | -                |
| 2184  | 6,47     | 7,58    | -1,17 | 0,01447 | 0,361 | 244890_at    | -                                                          | -                |
| 760   | 21,5     | 25,2    | -1,17 | 0,00429 | 0,308 | 1553657_at   | von Willebrand factor A domain containing 3A               | <i>VWA3A</i>     |
| 4410  | 20,0     | 23,4    | -1,17 | 0,03294 | 0,408 | 218933_at    | Spermatogenesis associated 5-like 1                        | <i>SPATA5L1</i>  |
| 2287  | 18,9     | 22,1    | -1,17 | 0,01520 | 0,363 | 1559870_at   | Clone IMAGE:5225645, mRNA                                  | -                |
| 1717  | 5,31     | 6,22    | -1,17 | 0,01101 | 0,348 | 230572_at    | Chromosome 4 open reading frame 38                         | <i>C4orf38</i>   |
| 5134  | 32,6     | 38,2    | -1,17 | 0,03950 | 0,421 | 221846_s_at  | CASK interacting protein 2                                 | <i>CASKIN2</i>   |
| 3787  | 8,70     | 10,2    | -1,17 | 0,02758 | 0,398 | 1556555_at   | cDNA clone IMAGE:4825327                                   | -                |
| 4004  | 95,5     | 112     | -1,17 | 0,02930 | 0,400 | 212861_at    | Major facilitator superfamily domain containing 5          | <i>MFSD5</i>     |
| 2327  | 4,72     | 5,52    | -1,17 | 0,01549 | 0,364 | 231095_at    | cDNA FLJ42857 fis, clone BRHIP2009340                      | -                |
| 1954  | 115      | 134     | -1,17 | 0,01276 | 0,355 | 221983_at    | Family with sequence similarity 134, member A              | <i>FAM134A</i>   |
| 3307  | 22,2     | 26,0    | -1,17 | 0,02352 | 0,388 | 239368_at    | Family with sequence similarity 111, member A              | <i>FAM111A</i>   |
| 5535  | 12,0     | 14,0    | -1,17 | 0,04394 | 0,434 | 215919_s_at  | Mitochondrial ribosomal protein S11                        | <i>MRPS11</i>    |
| 4520  | 131      | 153     | -1,17 | 0,03406 | 0,412 | 213604_at    | Transcription elongation factor B (SIII), polypeptide 3    | <i>TCEB3</i>     |
| 5081  | 38,7     | 45,2    | -1,17 | 0,03910 | 0,420 | 225587_at    | Transmembrane protein 129                                  | <i>TMEM129</i>   |
| 4836  | 3,92     | 4,58    | -1,17 | 0,03688 | 0,417 | 238977_at    | Minichromosome maintenance complex component 6             | <i>MCM6</i>      |
| 1128  | 9,05     | 10,6    | -1,17 | 0,00659 | 0,319 | 237735_at    | cDNA clone IMAGE:5296164                                   | -                |
| 3271  | 20,4     | 23,8    | -1,17 | 0,02326 | 0,388 | 227841_at    | Cementum protein 1                                         | <i>CEMP1</i>     |
| 5395  | 6,58     | 7,70    | -1,17 | 0,04231 | 0,429 | 1554465_s_at | Zinc finger protein 673                                    | <i>ZNF673</i>    |
| 2364  | 127      | 148     | -1,17 | 0,01578 | 0,364 | 31837_at     | Transmembrane protein 112B                                 | <i>TMEM112B</i>  |
| 5528  | 65,5     | 76,6    | -1,17 | 0,04384 | 0,434 | 203855_at    | WD repeat domain 47                                        | <i>WDR47</i>     |
| 5688  | 102      | 119     | -1,17 | 0,04542 | 0,437 | 214263_x_at  | Polymerase (RNA) II (DNA directed) polypeptide C, 33kDa    | <i>POLR2C</i>    |
| 5268  | 10,4     | 12,1    | -1,17 | 0,04091 | 0,425 | 229952_at    | Similar to Spectrin, beta, non-erythrocytic 1 isoform 4    | -                |
| 2796  | 9,32     | 10,9    | -1,17 | 0,01943 | 0,380 | 228705_at    | Calpain 12                                                 | <i>CAPN12</i>    |
| 4239  | 98,4     | 115     | -1,17 | 0,03141 | 0,405 | 215293_s_at  | FGF receptor activating protein 1                          | <i>FRAG1</i>     |
| 5492  | 3,85     | 4,50    | -1,17 | 0,04347 | 0,433 | 1552897_a_at | Potassium voltage-gated channel, subfamily G, member 3     | <i>KCNGB3</i>    |
| 2772  | 19,3     | 22,6    | -1,17 | 0,01924 | 0,379 | 235525_at    | cDNA FLJ39926 fis, clone SPLEN2021157                      | -                |
| 2385  | 50,7     | 59,3    | -1,17 | 0,01590 | 0,364 | 229164_s_at  | Ankyrin repeat and BTB (POZ) domain containing 1           | <i>ABTB1</i>     |
| 517   | 4,61     | 5,39    | -1,17 | 0,00275 | 0,291 | 220447_at    | Histamine receptor H3                                      | <i>HRH3</i>      |
| 2650  | 7,19     | 8,41    | -1,17 | 0,01807 | 0,373 | 233530_at    | (clone 33) macronuclear mRNA                               | -                |

| Index | Mutated* | Normal* | FC    | P value | FDR** | Probe set    | Description                                                              | Gene symbol |
|-------|----------|---------|-------|---------|-------|--------------|--------------------------------------------------------------------------|-------------|
| 1711  | 24,0     | 28,0    | -1,17 | 0,01095 | 0,348 | 1557450_s_at | Clone IMAGE:241447, mRNA sequence                                        | -           |
| 4617  | 44,4     | 51,9    | -1,17 | 0,03484 | 0,412 | 222732_at    | Tripartite motif-containing 39                                           | TRIM39      |
| 1050  | 10,6     | 12,4    | -1,17 | 0,00614 | 0,319 | 234113_at    | cDNA DKFZp313A1612                                                       | -           |
| 3422  | 50,8     | 59,4    | -1,17 | 0,02447 | 0,391 | 218427_at    | Serologically defined colon cancer antigen 3                             | SDCCAG3     |
| 3960  | 48,9     | 57,2    | -1,17 | 0,02892 | 0,399 | 204300_at    | PET112-like (yeast)                                                      | PET112L     |
| 5950  | 17,7     | 20,7    | -1,17 | 0,04826 | 0,443 | 243731_at    | Similar to Solute carrier family 27, member 5                            | -           |
| 2733  | 11,0     | 12,9    | -1,17 | 0,01884 | 0,377 | 208544_at    | Adrenergic, alpha-2B-, receptor                                          | ADRA2B      |
| 493   | 13,8     | 16,1    | -1,17 | 0,00264 | 0,289 | 205387_s_at  | Chorionic gonadotropin, beta polypeptide                                 | CGB         |
| 2108  | 4,48     | 5,23    | -1,17 | 0,01383 | 0,358 | 1560021_at   | cDNA FLJ37333 fis, clone BRAMY2020106                                    | -           |
| 5273  | 582      | 679     | -1,17 | 0,04098 | 0,425 | 200675_at    | CD81 molecule                                                            | CD81        |
| 3193  | 444      | 518     | -1,17 | 0,02262 | 0,387 | 223857_x_at  | Transmembrane protein 85                                                 | TMEM85      |
| 1296  | 56,2     | 65,7    | -1,17 | 0,00772 | 0,325 | 204189_at    | Retinoic acid receptor, gamma                                            | RARG        |
| 6101  | 7,39     | 8,63    | -1,17 | 0,04981 | 0,446 | 230818_at    | Transcribed locus                                                        | -           |
| 5595  | 3,62     | 4,22    | -1,17 | 0,04461 | 0,436 | 214540_at    | Histone cluster 1, H2bo                                                  | HIST1H2BO   |
| 5164  | 48,5     | 56,7    | -1,17 | 0,03980 | 0,421 | 212170_at    | RNA binding motif protein 12                                             | RBM12       |
| 2143  | 62,5     | 73,0    | -1,17 | 0,01411 | 0,360 | 221708_s_at  | Unc-45 homolog A (C. elegans)                                            | UNC45A      |
| 4880  | 15,9     | 18,6    | -1,17 | 0,03732 | 0,418 | 237044_s_at  | -                                                                        | -           |
| 905   | 12,8     | 14,9    | -1,17 | 0,00523 | 0,313 | 239785_at    | DAZ interacting protein 1-like                                           | DZIP1L      |
| 545   | 3,45     | 4,03    | -1,17 | 0,00294 | 0,295 | 207874_s_at  | Complement factor H-related 4                                            | CFHR4       |
| 1530  | 29,2     | 34,1    | -1,17 | 0,00947 | 0,337 | 1570197_at   | Clone IMAGE:5111803, mRNA                                                | -           |
| 3245  | 7,67     | 8,95    | -1,17 | 0,02301 | 0,388 | 226570_at    | ATPase, Na <sup>+</sup> /K <sup>+</sup> transporting, beta 3 polypeptide | ATP1B3      |
| 1311  | 18,6     | 21,7    | -1,17 | 0,00782 | 0,325 | 221981_s_at  | WD repeat domain 59                                                      | WDR59       |
| 467   | 16,0     | 18,6    | -1,17 | 0,00246 | 0,288 | 231723_at    | Sorting nexin 12                                                         | SNX12       |
| 945   | 5,62     | 6,56    | -1,17 | 0,00543 | 0,313 | 1558758_s_at | cDNA FLJ23791 fis, clone HEP21711                                        | -           |
| 1010  | 24,7     | 28,8    | -1,17 | 0,00586 | 0,316 | 1557105_a_at | cDNA DKFZp686P1116                                                       | -           |
| 3662  | 60,8     | 70,9    | -1,17 | 0,02648 | 0,395 | 1552615_at   | Acetyl-Coenzyme A carboxylase beta                                       | ACACB       |
| 2914  | 3,78     | 4,41    | -1,17 | 0,02047 | 0,383 | 233688_at    | Kv channel interacting protein 3, calsenilin                             | KCNIP3      |
| 739   | 10,1     | 11,8    | -1,17 | 0,00420 | 0,308 | 240763_at    | Transcribed locus                                                        | -           |
| 1289  | 44,1     | 51,4    | -1,17 | 0,00767 | 0,325 | 203677_s_at  | TAR (HIV-1) RNA binding protein 2                                        | TARBP2      |
| 998   | 6,74     | 7,86    | -1,17 | 0,00576 | 0,316 | 243156_at    | Transcribed locus                                                        | -           |
| 541   | 7,87     | 9,17    | -1,17 | 0,00290 | 0,293 | 236998_at    | Coiled-coil domain containing 56                                         | CCDC56      |
| 3411  | 6,42     | 7,49    | -1,17 | 0,02434 | 0,390 | 208087_s_at  | Z-DNA binding protein 1                                                  | ZBP1        |
| 946   | 15,6     | 18,2    | -1,17 | 0,00543 | 0,313 | 233694_at    | Heat shock 70kDa protein 1-like                                          | HSPA1L      |
| 299   | 5,70     | 6,64    | -1,17 | 0,00145 | 0,263 | 230806_s_at  | Family with sequence similarity 65, member A                             | FAM65A      |
| 453   | 8,54     | 9,95    | -1,17 | 0,00243 | 0,288 | 220057_at    | X antigen family, member 1D                                              | XAGE1D      |
| 2997  | 14,9     | 17,4    | -1,17 | 0,02111 | 0,385 | 235239_at    | Quiescin Q6 sulfhydryl oxidase 2                                         | QSOX2       |
| 3428  | 42,2     | 49,2    | -1,17 | 0,02454 | 0,391 | 204691_x_at  | Phospholipase A2, group VI (cytosolic, calcium-independent)              | PLA2G6      |
| 1760  | 17,3     | 20,2    | -1,17 | 0,01122 | 0,348 | 1554523_a_at | Cyclin M2                                                                | CNNM2       |
| 40    | 4,68     | 5,45    | -1,17 | 0,00017 | 0,201 | 1557879_at   | Coiled-coil domain containing 108                                        | CCDC108     |
| 645   | 14,3     | 16,7    | -1,17 | 0,00367 | 0,308 | 243266_at    | Transcribed locus                                                        | -           |
| 1629  | 7,28     | 8,49    | -1,17 | 0,01026 | 0,344 | 234133_s_at  | Hypothetical protein LOC728543                                           | LOC728543   |
| 891   | 17,5     | 20,4    | -1,17 | 0,00515 | 0,313 | 219707_at    | Copine VII                                                               | CPNE7       |
| 2461  | 21,0     | 24,5    | -1,16 | 0,01652 | 0,367 | 219986_s_at  | Acyl-Coenzyme A dehydrogenase family, member 10                          | ACAD10      |
| 5457  | 26,4     | 30,7    | -1,16 | 0,04312 | 0,432 | 218141_at    | Ubiquitin-conjugating enzyme E2O                                         | UBE2O       |
| 5783  | 10,3     | 12,0    | -1,16 | 0,04656 | 0,440 | 215660_s_at  | Microtubule associated serine/threonine kinase 2                         | MAST2       |
| 613   | 6,71     | 7,81    | -1,16 | 0,00346 | 0,308 | 217376_at    | Similar to Signal-regulatory protein gamma precursor                     | LOC441938   |
| 5914  | 14,8     | 17,3    | -1,16 | 0,04794 | 0,443 | 224406_s_at  | Fc receptor-like 5                                                       | FCRL5       |
| 901   | 69,2     | 80,6    | -1,16 | 0,00522 | 0,313 | 218083_at    | Prostaglandin E synthase 2                                               | PTGES2      |
| 3231  | 6,33     | 7,37    | -1,16 | 0,02291 | 0,388 | 215087_at    | Chromosome 15 open reading frame 39                                      | C15orf39    |
| 255   | 7,50     | 8,73    | -1,16 | 0,00119 | 0,254 | 232430_at    | Hypothetical LOC148696                                                   | LOC148696   |
| 3337  | 45,3     | 52,7    | -1,16 | 0,02368 | 0,388 | 212035_s_at  | Exocyst complex component 7                                              | EXOC7       |
| 2789  | 370      | 430     | -1,16 | 0,01939 | 0,380 | 200098_s_at  | Anaphase promoting complex subunit 5                                     | ANAPC5      |
| 608   | 19,3     | 22,4    | -1,16 | 0,00340 | 0,306 | 1567166_at   | -                                                                        | -           |
| 1595  | 5,42     | 6,30    | -1,16 | 0,00992 | 0,340 | 210746_s_at  | Erythrocyte membrane protein band 4.2                                    | EPB42       |
| 1251  | 15,7     | 18,3    | -1,16 | 0,00744 | 0,325 | 207366_at    | Potassium voltage-gated channel subfamily S member 1                     | KCNS1       |
| 4576  | 99,3     | 115     | -1,16 | 0,03459 | 0,412 | 203694_s_at  | DEAH (Asp-Glu-Ala-His) box polypeptide 16                                | DHX16       |
| 2151  | 6,43     | 7,49    | -1,16 | 0,01417 | 0,360 | 1565254_s_at | Elongation factor RNA polymerase II                                      | ELL         |

| Index | Mutated* | Normal* | FC    | P value | FDR** | Probe set    | Description                                                                   | Gene symbol      |
|-------|----------|---------|-------|---------|-------|--------------|-------------------------------------------------------------------------------|------------------|
| 1699  | 9,19     | 10,7    | -1,16 | 0,01082 | 0,348 | 222080_s_at  | cDNA clone IMAGE:4865340                                                      | -                |
| 2487  | 3,57     | 4,15    | -1,16 | 0,01677 | 0,367 | 208382_s_at  | DMC1 dosage suppressor of mck1 homolog                                        | <i>DMC1</i>      |
| 1405  | 5,63     | 6,55    | -1,16 | 0,00849 | 0,330 | 238023_at    | -                                                                             | -                |
| 3152  | 12,3     | 14,4    | -1,16 | 0,02237 | 0,387 | 220805_at    | Histamine receptor H2                                                         | <i>HRH2</i>      |
| 4678  | 6,72     | 7,82    | -1,16 | 0,03532 | 0,413 | 207495_at    | RAB28, member RAS oncogene family                                             | <i>RAB28</i>     |
| 1942  | 3,04     | 3,54    | -1,16 | 0,01266 | 0,355 | 214586_at    | G protein-coupled receptor 37 (endothelin receptor type B-like)               | <i>GPR37</i>     |
| 5552  | 17,7     | 20,6    | -1,16 | 0,04418 | 0,435 | 1555083_at   | Ribosomal protein L13A pseudogene                                             | <i>MGC34774</i>  |
| 3318  | 60,0     | 69,8    | -1,16 | 0,02358 | 0,388 | 225620_at    | RAB35, member RAS oncogene family                                             | <i>RAB35</i>     |
| 14    | 3,64     | 4,23    | -1,16 | 0,00005 | 0,191 | 1553447_at   | ATP/GTP binding protein-like 1                                                | <i>AGBL1</i>     |
| 5363  | 3,79     | 4,41    | -1,16 | 0,04208 | 0,429 | 244313_at    | Complement component (3b/4b) receptor 1 (Knops blood group)                   | <i>CR1</i>       |
| 5287  | 116      | 135     | -1,16 | 0,04113 | 0,425 | 218089_at    | Chromosome 20 open reading frame 4                                            | <i>C20orf4</i>   |
| 2400  | 35,4     | 41,1    | -1,16 | 0,01600 | 0,365 | 202099_s_at  | DiGeorge syndrome critical region gene 2                                      | <i>DGCR2</i>     |
| 1137  | 5,46     | 6,35    | -1,16 | 0,00664 | 0,319 | 1553044_at   | Connexin 62                                                                   | <i>CX62</i>      |
| 3811  | 36,3     | 42,2    | -1,16 | 0,02777 | 0,398 | 221250_s_at  | MAX dimerization protein 3                                                    | <i>MXD3</i>      |
| 195   | 6,87     | 7,99    | -1,16 | 0,00090 | 0,244 | 220645_at    | Family with sequence similarity 55, member D                                  | <i>FAM55D</i>    |
| 2872  | 11,6     | 13,5    | -1,16 | 0,02018 | 0,383 | 214340_at    | Arachidonate 12-lipoxygenase pseudogene 2                                     | <i>ALOX12P2</i>  |
| 342   | 15,6     | 18,1    | -1,16 | 0,00174 | 0,277 | 227832_at    | Methyl-CpG binding domain protein 6                                           | <i>MBD6</i>      |
| 5372  | 6,80     | 7,90    | -1,16 | 0,04216 | 0,429 | 244294_at    | cDNA FLJ26260 fis, clone DMC05193                                             | -                |
| 374   | 6,54     | 7,60    | -1,16 | 0,00196 | 0,284 | 216825_s_at  | Myeloproliferative leukemia virus oncogene                                    | <i>MPL</i>       |
| 3226  | 5,40     | 6,27    | -1,16 | 0,02286 | 0,387 | 238945_at    | -                                                                             | -                |
| 4726  | 24,6     | 28,6    | -1,16 | 0,03576 | 0,414 | 202385_s_at  | Treacher Collins-Franceschetti syndrome 1                                     | <i>TCOF1</i>     |
| 4125  | 30,1     | 35,0    | -1,16 | 0,03034 | 0,402 | 236667_at    | Transmembrane protein 120B                                                    | <i>TMEM120B</i>  |
| 536   | 6,29     | 7,31    | -1,16 | 0,00286 | 0,292 | 230325_at    | cDNA clone IMAGE:4393471                                                      | -                |
| 2004  | 5,48     | 6,37    | -1,16 | 0,01308 | 0,355 | 1557196_a_at | cDNA DKFZp547B198                                                             | -                |
| 1074  | 7,69     | 8,92    | -1,16 | 0,00630 | 0,319 | 207260_at    | FEV (ETS oncogene family)                                                     | <i>FEV</i>       |
| 2875  | 9,86     | 11,5    | -1,16 | 0,02019 | 0,383 | 231958_at    | Chromosome 3 open reading frame 31                                            | <i>C3orf31</i>   |
| 4574  | 16,0     | 18,6    | -1,16 | 0,03457 | 0,412 | 1558529_s_at | Clone IMAGE:4778855, mRNA                                                     | -                |
| 5793  | 11,3     | 13,1    | -1,16 | 0,04672 | 0,441 | 204465_s_at  | Internexin neuronal intermediate filament protein, alpha                      | <i>INA</i>       |
| 2700  | 17,3     | 20,1    | -1,16 | 0,01852 | 0,375 | 211521_s_at  | Pleckstrin homology, Sec7 and coiled-coil domains 4                           | <i>PSCD4</i>     |
| 4582  | 7,79     | 9,04    | -1,16 | 0,03461 | 0,412 | 209697_at    | Protein phosphatase 2B, catalytic subunit, gamma isoform                      | <i>PPP3CC</i>    |
| 3975  | 11,3     | 13,1    | -1,16 | 0,02906 | 0,400 | 235939_at    | cDNA FLJ36815 fis, clone ASTRO2003740                                         | -                |
| 6075  | 13,3     | 15,4    | -1,16 | 0,04959 | 0,446 | 213200_at    | Synaptophysin                                                                 | <i>SYP</i>       |
| 2869  | 6,34     | 7,36    | -1,16 | 0,02014 | 0,383 | 236257_at    | CD2-associated protein                                                        | <i>CD2AP</i>     |
| 3336  | 4,35     | 5,04    | -1,16 | 0,02367 | 0,388 | 242183_at    | cDNA FLJ38849 fis, clone MESAN2008936                                         | -                |
| 4421  | 9,37     | 10,9    | -1,16 | 0,03310 | 0,409 | 213078_x_at  | 1-acylglycerol-3-phosphate O-acyltransferase 7 (lysophosphatidic acid acyltra | <i>AGPAT7</i>    |
| 1355  | 7,95     | 9,22    | -1,16 | 0,00814 | 0,328 | 216409_at    | Acyl-CoA synthetase long-chain family member 6                                | <i>ACSL6</i>     |
| 954   | 5,47     | 6,34    | -1,16 | 0,00549 | 0,314 | 1560255_at   | Chromosome 10 open reading frame 31                                           | <i>C10orf31</i>  |
| 5922  | 4,99     | 5,79    | -1,16 | 0,04799 | 0,443 | 205955_at    | -                                                                             | -                |
| 5522  | 9,97     | 11,6    | -1,16 | 0,04381 | 0,433 | 241671_x_at  | Hypothetical locus LOC401237                                                  | <i>FLJ22536</i>  |
| 903   | 3,62     | 4,20    | -1,16 | 0,00523 | 0,313 | 207433_at    | Interleukin 10                                                                | <i>IL10</i>      |
| 2846  | 12,3     | 14,2    | -1,16 | 0,01992 | 0,383 | 1554332_a_at | mRNA similar to LOC149651                                                     | -                |
| 4529  | 314      | 364     | -1,16 | 0,03419 | 0,412 | 203462_x_at  | Eukaryotic translation initiation factor 3, subunit B                         | <i>EIF3B</i>     |
| 1552  | 14,7     | 17,0    | -1,16 | 0,00957 | 0,337 | 231189_at    | Hypothetical protein MGC40574                                                 | <i>MGC40574</i>  |
| 4649  | 21,0     | 24,3    | -1,16 | 0,03508 | 0,413 | 234465_at    | Essential meiotic endonuclease 1 homolog 1 (S. pombe)                         | <i>EME1</i>      |
| 2248  | 9,12     | 10,6    | -1,16 | 0,01494 | 0,363 | 210039_s_at  | Protein kinase C, theta                                                       | <i>PRKCQ</i>     |
| 5192  | 10,2     | 11,8    | -1,16 | 0,04001 | 0,421 | 214300_s_at  | Topoisomerase (DNA) III alpha                                                 | <i>TOP3A</i>     |
| 2279  | 7,85     | 9,10    | -1,16 | 0,01515 | 0,363 | 231664_at    | Solute carrier family 25, member 29                                           | <i>SLC25A29</i>  |
| 4234  | 48,5     | 56,2    | -1,16 | 0,03139 | 0,405 | 218758_s_at  | Ribosomal RNA processing 1 homolog (S. cerevisiae)                            | <i>RRP1</i>      |
| 3134  | 26,1     | 30,2    | -1,16 | 0,02222 | 0,387 | 211133_x_at  | Leukocyte immunoglobulin-like receptor, subfamily B member 3                  | <i>LILRB3</i>    |
| 3780  | 14,2     | 16,4    | -1,16 | 0,02752 | 0,398 | 239933_x_at  | -                                                                             | -                |
| 35    | 4,89     | 5,66    | -1,16 | 0,00015 | 0,201 | 1563743_at   | Chromosome 1 open reading frame 180                                           | <i>C1orf180</i>  |
| 1617  | 6,95     | 8,06    | -1,16 | 0,01014 | 0,343 | 206119_at    | Betaine-homocysteine methyltransferase                                        | <i>BHMT</i>      |
| 951   | 8,71     | 10,1    | -1,16 | 0,00545 | 0,314 | 227867_at    | Hypothetical protein LOC129293                                                | <i>LOC129293</i> |
| 5052  | 9,96     | 11,5    | -1,16 | 0,03892 | 0,420 | 224088_at    | Neuromedin U receptor 2                                                       | <i>NMUR2</i>     |
| 4972  | 33,1     | 38,3    | -1,16 | 0,03816 | 0,419 | 205333_s_at  | RCE1 homolog, prenyl protein peptidase (S. cerevisiae)                        | <i>RCE1</i>      |
| 4706  | 29,8     | 34,5    | -1,16 | 0,03558 | 0,413 | 226369_at    | Hypothetical locus LOC338799                                                  | <i>LOC338799</i> |
| 2092  | 4,28     | 4,96    | -1,16 | 0,01367 | 0,357 | 1554086_at   | Tubulin, gamma complex associated protein 3                                   | <i>TUBGCP3</i>   |



| Index | Mutated* | Normal* | FC    | P value | FDR** | Probe set    | Description                                                                        | Gene symbol |
|-------|----------|---------|-------|---------|-------|--------------|------------------------------------------------------------------------------------|-------------|
| 3224  | 6,48     | 7,51    | -1,16 | 0,02284 | 0,387 | 207600_at    | Potassium voltage-gated channel subfamily C member 3                               | KCNK3       |
| 632   | 5,88     | 6,81    | -1,16 | 0,00357 | 0,308 | 207064_s_at  | Amine oxidase, copper containing 2 (retina-specific)                               | AOC2        |
| 2113  | 5,37     | 6,22    | -1,16 | 0,01385 | 0,358 | 228022_at    | Coiled-coil domain containing 18                                                   | CCDC18      |
| 2332  | 9,35     | 10,8    | -1,16 | 0,01556 | 0,364 | 1557729_at   | G protein-coupled receptor kinase 5                                                | GRK5        |
| 1678  | 14,6     | 16,9    | -1,16 | 0,01059 | 0,345 | 238473_at    | cDNA clone IMAGE:4432160                                                           | -           |
| 1164  | 17,0     | 19,7    | -1,16 | 0,00685 | 0,321 | 240607_at    | Myocardial infarction associated transcript                                        | MIAT        |
| 1014  | 18,6     | 21,6    | -1,16 | 0,00587 | 0,316 | 238789_at    | Ankyrin repeat domain 15                                                           | ANKRD15     |
| 5665  | 21,5     | 24,9    | -1,16 | 0,04520 | 0,436 | 218855_at    | G protein-coupled receptor 175                                                     | GPR175      |
| 1441  | 3,89     | 4,50    | -1,16 | 0,00876 | 0,332 | 1562458_at   | Ubiquitin-conjugating enzyme E2W                                                   | UBE2W       |
| 2600  | 6,70     | 7,75    | -1,16 | 0,01766 | 0,371 | 242437_at    | Similar to XP_529777.1                                                             | -           |
| 269   | 7,07     | 8,19    | -1,16 | 0,00128 | 0,260 | 242757_at    | MAM domain containing glycosylphosphatidylinositol anchor 1                        | MDGA1       |
| 1762  | 4,89     | 5,66    | -1,16 | 0,01123 | 0,348 | 206341_at    | Interleukin 2 receptor, alpha                                                      | IL2RA       |
| 5872  | 3,52     | 4,08    | -1,16 | 0,04744 | 0,442 | 243689_s_at  | Chromosome 20 open reading frame 80                                                | C20orf80    |
| 845   | 5,01     | 5,80    | -1,16 | 0,00485 | 0,313 | 210451_at    | Pyruvate kinase, liver and RBC                                                     | PKLR        |
| 2133  | 12,5     | 14,5    | -1,16 | 0,01402 | 0,359 | 205944_s_at  | Clathrin, heavy chain-like 1                                                       | CLTCL1      |
| 5696  | 10,7     | 12,3    | -1,16 | 0,04559 | 0,438 | 230936_at    | DnaJ (Hsp40) related, subfamily B, member 13                                       | DNAJB13     |
| 1665  | 13,5     | 15,6    | -1,16 | 0,01053 | 0,345 | 232550_at    | Abhydrolase domain containing 1                                                    | ABHD1       |
| 2043  | 52,9     | 61,2    | -1,16 | 0,01329 | 0,355 | 34225_at     | Wolf-Hirschhorn syndrome candidate 2                                               | WHSC2       |
| 4947  | 316      | 365     | -1,16 | 0,03797 | 0,419 | 208688_x_at  | Eukaryotic translation initiation factor 3, subunit B                              | EIF3B       |
| 446   | 19,5     | 22,6    | -1,16 | 0,00238 | 0,288 | 1555215_a_at | Histamine receptor H3                                                              | HRH3        |
| 329   | 8,12     | 9,39    | -1,16 | 0,00164 | 0,272 | 234698_at    | N-6 adenine-specific DNA methyltransferase 1 (putative)                            | N6AMT1      |
| 4367  | 51,3     | 59,3    | -1,16 | 0,03248 | 0,407 | 201945_at    | Furin (paired basic amino acid cleaving enzyme)                                    | FURIN       |
| 1195  | 64,4     | 74,5    | -1,16 | 0,00705 | 0,323 | 1552749_a_at | Kinesin light chain 3                                                              | KLC3        |
| 5012  | 7,39     | 8,55    | -1,16 | 0,03852 | 0,420 | 207440_at    | Solute carrier family 35, member A2                                                | SLC35A2     |
| 4914  | 15,6     | 18,1    | -1,16 | 0,03762 | 0,418 | 232134_at    | cDNA FLJ11652 fis, clone HEMBA1004461                                              | -           |
| 531   | 21,7     | 25,0    | -1,16 | 0,00284 | 0,292 | 237630_s_at  | Clone PP1195 unknown mRNA                                                          | -           |
| 1695  | 7,06     | 8,17    | -1,16 | 0,01077 | 0,347 | 214558_at    | G protein-coupled receptor 12                                                      | GPR12       |
| 3142  | 60,2     | 69,6    | -1,16 | 0,02229 | 0,387 | 209490_s_at  | Palmitoyl-protein thioesterase 2                                                   | PPT2        |
| 5510  | 146      | 168     | -1,16 | 0,04366 | 0,433 | 211630_s_at  | Glutathione synthetase                                                             | GSS         |
| 4737  | 21,7     | 25,1    | -1,16 | 0,03585 | 0,414 | 1563318_s_at | MAGI family member, X-linked                                                       | MAGIX       |
| 4944  | 10,2     | 11,8    | -1,16 | 0,03793 | 0,419 | 208352_x_at  | Ankyrin 1, erythrocytic                                                            | ANK1        |
| 5231  | 13,3     | 15,4    | -1,16 | 0,04047 | 0,423 | 205813_s_at  | Methionine adenosyltransferase I, alpha                                            | MAT1A       |
| 2110  | 5,89     | 6,81    | -1,16 | 0,01384 | 0,358 | 1553789_a_at | Chromosome 21 open reading frame 58                                                | C21orf58    |
| 724   | 4,85     | 5,60    | -1,16 | 0,00414 | 0,308 | 232139_s_at  | KIAA1919 protein                                                                   | KIAA1919    |
| 4413  | 13,9     | 16,1    | -1,16 | 0,03300 | 0,409 | 232274_at    | Cyclin L2                                                                          | CCNL2       |
| 2430  | 6,98     | 8,07    | -1,16 | 0,01625 | 0,365 | 239800_at    | Transcribed locus                                                                  | -           |
| 366   | 13,9     | 16,1    | -1,16 | 0,00191 | 0,284 | 231306_at    | Lysozyme-like 4                                                                    | LYZL4       |
| 4093  | 6,02     | 6,96    | -1,16 | 0,03009 | 0,402 | 236242_at    | -                                                                                  | -           |
| 2568  | 12,7     | 14,7    | -1,16 | 0,01742 | 0,371 | 223563_at    | Guanine nucleotide binding protein (G protein), beta polypeptide 1-like            | GNB1L       |
| 1400  | 5,01     | 5,79    | -1,16 | 0,00846 | 0,330 | 240620_at    | Transcribed locus                                                                  | -           |
| 4888  | 9,31     | 10,8    | -1,16 | 0,03737 | 0,418 | 236132_at    | -                                                                                  | -           |
| 4145  | 19,8     | 22,9    | -1,16 | 0,03059 | 0,403 | 1556797_at   | Hypothetical protein LOC386597                                                     | LOC386597   |
| 3031  | 16,0     | 18,5    | -1,15 | 0,02136 | 0,385 | 236073_at    | EPH receptor A10                                                                   | EPHA10      |
| 153   | 7,77     | 8,97    | -1,15 | 0,00070 | 0,244 | 241087_at    | -                                                                                  | -           |
| 2144  | 7,56     | 8,73    | -1,15 | 0,01412 | 0,360 | 204330_s_at  | Mitochondrial ribosomal protein S12                                                | MRPS12      |
| 4857  | 22,5     | 26,0    | -1,15 | 0,03704 | 0,417 | 206827_s_at  | Transient receptor potential cation channel subfamily V member 6                   | TRPV6       |
| 1459  | 7,09     | 8,19    | -1,15 | 0,00891 | 0,334 | 228388_at    | Nuclear factor of kappa light polypeptide gene enhancer in B-cells inhibitor, beta | NFKBIB      |
| 1193  | 13,6     | 15,7    | -1,15 | 0,00703 | 0,322 | 208128_x_at  | Kinesin family member 25                                                           | KIF25       |
| 5235  | 12,3     | 14,2    | -1,15 | 0,04051 | 0,423 | 209767_s_at  | Glycoprotein Ib (platelet), beta polypeptide                                       | GP1BB       |
| 3970  | 8,35     | 9,64    | -1,15 | 0,02900 | 0,399 | 204696_s_at  | Cell division cycle 25 homolog A (S. pombe)                                        | CDC25A      |
| 3285  | 8,08     | 9,33    | -1,15 | 0,02341 | 0,388 | 1554646_at   | Oxysterol binding protein-like 1A                                                  | OSBPL1A     |
| 733   | 8,61     | 9,94    | -1,15 | 0,00419 | 0,308 | 233196_at    | cDNA FLJ11777 fis, clone HEMBA1005909                                              | -           |
| 5402  | 117      | 135     | -1,15 | 0,04238 | 0,429 | 213203_at    | Small nuclear RNA activating complex, polypeptide 5, 19kDa                         | SNAPC5      |
| 3124  | 4,31     | 4,98    | -1,15 | 0,02214 | 0,387 | 215056_at    | Clone 23695 mRNA sequence                                                          | -           |
| 3923  | 4,11     | 4,75    | -1,15 | 0,02868 | 0,399 | 1569315_s_at | Hypothetical protein FLJ44451                                                      | FLJ44451    |
| 3303  | 12,3     | 14,2    | -1,15 | 0,02351 | 0,388 | 213870_at    | Collagen, type XI, alpha 2                                                         | COL11A2     |
| 5333  | 13,3     | 15,4    | -1,15 | 0,04175 | 0,428 | 230439_at    | Hypothetical gene supported by BC031661                                            | LOC389458   |

| Index | Mutated* | Normal* | FC    | P value | FDR** | Probe set   | Description                                                       | Gene symbol     |
|-------|----------|---------|-------|---------|-------|-------------|-------------------------------------------------------------------|-----------------|
| 5217  | 50,1     | 57,8    | -1,15 | 0,04031 | 0,422 | 203412_at   | Leucine-zipper-like transcription regulator 1                     | <i>LZTR1</i>    |
| 3573  | 59,0     | 68,1    | -1,15 | 0,02580 | 0,394 | 226428_at   | Transportin 2 (importin 3, karyopherin beta 2b)                   | <i>TNPO2</i>    |
| 4667  | 24,2     | 27,9    | -1,15 | 0,03524 | 0,413 | 227060_at   | RELT tumor necrosis factor receptor                               | <i>RELT</i>     |
| 2678  | 9,52     | 11,0    | -1,15 | 0,01832 | 0,374 | 233138_at   | Chromosome 18 open reading frame 1                                | <i>C18orf1</i>  |
| 770   | 6,49     | 7,49    | -1,15 | 0,00442 | 0,311 | 215511_at   | Transcription factor 20                                           | <i>TCF20</i>    |
| 2355  | 20,5     | 23,7    | -1,15 | 0,01572 | 0,364 | 208242_at   | Retina and anterior neural fold homeobox                          | <i>RAX</i>      |
| 253   | 5,04     | 5,82    | -1,15 | 0,00117 | 0,254 | 208553_at   | Histone cluster 1, H1e                                            | <i>HIST1H1E</i> |
| 1039  | 15,9     | 18,3    | -1,15 | 0,00604 | 0,318 | 211231_x_at | Cytochrome P450, family 4, subfamily A, polypeptide 11            | <i>CYP4A11</i>  |
| 259   | 7,38     | 8,52    | -1,15 | 0,00122 | 0,257 | 232708_at   | Galactose-1-phosphate uridylyltransferase                         | <i>GALT</i>     |
| 94    | 7,50     | 8,65    | -1,15 | 0,00035 | 0,206 | 237726_at   | Transcribed locus                                                 | -               |
| 1716  | 7,82     | 9,02    | -1,15 | 0,01100 | 0,348 | 236482_at   | Transmembrane channel-like 6                                      | <i>TMC6</i>     |
| 1167  | 7,75     | 8,94    | -1,15 | 0,00687 | 0,321 | 1565879_at  | Full length insert cDNA clone YQ73D03                             | -               |
| 5124  | 30,7     | 35,4    | -1,15 | 0,03944 | 0,421 | 226514_at   | Zinc finger protein 71                                            | <i>ZNF71</i>    |
| 13    | 4,13     | 4,76    | -1,15 | 0,00005 | 0,191 | 241819_at   | Tumor necrosis factor (ligand) superfamily, member 8              | <i>TNFSF8</i>   |
| 1621  | 6,29     | 7,26    | -1,15 | 0,01018 | 0,343 | 238416_x_at | Conserved nuclear protein NHN1                                    | <i>NHN1</i>     |
| 2034  | 11,9     | 13,8    | -1,15 | 0,01324 | 0,355 | 204095_s_at | Elongation factor RNA polymerase II                               | <i>ELL</i>      |
| 1613  | 5,37     | 6,19    | -1,15 | 0,01011 | 0,343 | 1552833_at  | UDP-GlcNAc:betaGal beta-1,3-N-acetylglucosaminyltransferase 6     | <i>B3GNT6</i>   |
| 4601  | 13,7     | 15,8    | -1,15 | 0,03480 | 0,412 | 219883_at   | Potassium channel, subfamily K, member 4                          | <i>KCNK4</i>    |
| 1861  | 16,8     | 19,3    | -1,15 | 0,01201 | 0,353 | 1555998_at  | ATP synthase D chain, mitochondrial                               | <i>ATP5H</i>    |
| 240   | 5,81     | 6,69    | -1,15 | 0,00111 | 0,250 | 236061_at   | PR domain containing 15                                           | <i>PRDM15</i>   |
| 114   | 3,63     | 4,19    | -1,15 | 0,00051 | 0,240 | 241085_at   | Similar to Adrenergic, alpha-1A-, receptor                        | -               |
| 39    | 9,63     | 11,1    | -1,15 | 0,00016 | 0,201 | 236392_at   | p53-associated parkin-like cytoplasmic protein                    | <i>PARC</i>     |
| 3545  | 13,9     | 16,0    | -1,15 | 0,02550 | 0,393 | 205950_s_at | Carbonic anhydrase I                                              | <i>CA1</i>      |
| 5839  | 11,9     | 13,7    | -1,15 | 0,04718 | 0,442 | 209334_s_at | Proteasome (prosome, macropain) 26S subunit, non-ATPase, 9        | <i>PSMD9</i>    |
| 5481  | 183      | 211     | -1,15 | 0,04338 | 0,433 | 201342_at   | Small nuclear ribonucleoprotein polypeptide C                     | <i>SNRPC</i>    |
| 322   | 4,97     | 5,73    | -1,15 | 0,00161 | 0,272 | 1561916_at  | GA binding protein transcription factor, alpha subunit pseudogene | <i>GABPAP</i>   |
| 3184  | 8,38     | 9,67    | -1,15 | 0,02257 | 0,387 | 228800_x_at | Aurora kinase A interacting protein 1                             | <i>AURKAIP1</i> |
| 816   | 25,7     | 29,6    | -1,15 | 0,00466 | 0,312 | 1555478_at  | Chromosome 17 open reading frame 82                               | <i>C17orf82</i> |
| 2712  | 7,07     | 8,15    | -1,15 | 0,01861 | 0,375 | 205468_s_at | Interferon regulatory factor 5                                    | <i>IRF5</i>     |
| 5717  | 59,9     | 69,0    | -1,15 | 0,04578 | 0,438 | 227951_s_at | Family with sequence similarity 98, member C                      | <i>FAM98C</i>   |
| 1063  | 6,88     | 7,93    | -1,15 | 0,00624 | 0,319 | 223929_s_at | -                                                                 | -               |
| 920   | 6,68     | 7,69    | -1,15 | 0,00530 | 0,313 | 232590_at   | cDNA FLJ33454 fis, clone BRAMY2000231                             | -               |
| 852   | 13,1     | 15,1    | -1,15 | 0,00490 | 0,313 | 231151_at   | Discs, large (Drosophila) homolog-associated protein 3            | <i>DLGAP3</i>   |
| 232   | 7,56     | 8,70    | -1,15 | 0,00108 | 0,250 | 211848_s_at | Carcinoembryonic antigen-related cell adhesion molecule 7         | <i>CEACAM7</i>  |
| 5983  | 6,03     | 6,94    | -1,15 | 0,04859 | 0,444 | 1555953_at  | Collagen, type XVIII, alpha 1                                     | <i>COL18A1</i>  |
| 4137  | 18,8     | 21,6    | -1,15 | 0,03049 | 0,403 | 219620_x_at | Chromosome 9 open reading frame 167                               | <i>C9orf167</i> |
| 2841  | 11,3     | 13,0    | -1,15 | 0,01984 | 0,382 | 241825_at   | Chromosome 2 open reading frame 60                                | <i>C2orf60</i>  |
| 4825  | 376      | 433     | -1,15 | 0,03670 | 0,416 | 200055_at   | Transcription initiation factor TFIID 30 kD subunit               | <i>TAF10</i>    |
| 340   | 30,6     | 35,3    | -1,15 | 0,00173 | 0,277 | 239607_at   | G protein-coupled receptor 156                                    | <i>GPR156</i>   |
| 1145  | 14,7     | 16,9    | -1,15 | 0,00671 | 0,321 | 207685_at   | Crystallin, beta B3                                               | <i>CRYBB3</i>   |
| 735   | 7,99     | 9,20    | -1,15 | 0,00419 | 0,308 | 220971_at   | Interleukin 25                                                    | <i>IL25</i>     |
| 470   | 10,7     | 12,3    | -1,15 | 0,00251 | 0,289 | 1552652_at  | Hermansky-Pudlak syndrome 4                                       | <i>HPS4</i>     |
| 2451  | 20,4     | 23,5    | -1,15 | 0,01641 | 0,366 | 204371_s_at | KH-type splicing regulatory protein (FUSE binding protein 2)      | <i>KHSRP</i>    |
| 3498  | 7,70     | 8,87    | -1,15 | 0,02514 | 0,392 | 211211_x_at | SH2 domain protein 1A, Duncan's disease                           | <i>SH2D1A</i>   |
| 3597  | 19,9     | 22,9    | -1,15 | 0,02595 | 0,394 | 207188_at   | Cyclin-dependent kinase 3                                         | <i>CDK3</i>     |
| 834   | 7,30     | 8,41    | -1,15 | 0,00476 | 0,312 | 240818_at   | Similar to Ovochymase 1                                           | -               |
| 3381  | 16,7     | 19,2    | -1,15 | 0,02406 | 0,389 | 217058_at   | GNAS complex locus                                                | <i>GNAS</i>     |
| 1841  | 8,35     | 9,61    | -1,15 | 0,01183 | 0,351 | 208602_x_at | CD6 molecule                                                      | <i>CD6</i>      |
| 2210  | 19,1     | 21,9    | -1,15 | 0,01464 | 0,362 | 230756_at   | Zinc finger protein 683                                           | <i>ZNF683</i>   |
| 3291  | 9,44     | 10,9    | -1,15 | 0,02344 | 0,388 | 211469_s_at | Chemokine (C-X-C motif) receptor 6                                | <i>CXCR6</i>    |
| 3334  | 7,81     | 8,99    | -1,15 | 0,02366 | 0,388 | 223600_s_at | KIAA1683 protein                                                  | <i>KIAA1683</i> |
| 1724  | 14,5     | 16,6    | -1,15 | 0,01104 | 0,348 | 227743_at   | Myosin XVB pseudogene                                             | <i>MYO15B</i>   |
| 1276  | 12,2     | 14,0    | -1,15 | 0,00759 | 0,325 | 241166_at   | Transcribed locus                                                 | -               |
| 3646  | 56,2     | 64,7    | -1,15 | 0,02634 | 0,395 | 239053_at   | Cytosolic iron-sulfur protein assembly 1 homolog (S. cerevisiae)  | <i>CIAO1</i>    |
| 2231  | 8,12     | 9,34    | -1,15 | 0,01482 | 0,363 | 224273_at   | Chromosome 3 open reading frame 20                                | <i>C3orf20</i>  |
| 4120  | 30,0     | 34,6    | -1,15 | 0,03028 | 0,402 | 219019_at   | -                                                                 | -               |
| 2523  | 3,41     | 3,92    | -1,15 | 0,01702 | 0,369 | 232026_at   | Hect domain and RLD 4                                             | <i>HERC4</i>    |

| Index | Mutated* | Normal* | FC    | P value | FDR** | Probe set    | Description                                                   | Gene symbol |
|-------|----------|---------|-------|---------|-------|--------------|---------------------------------------------------------------|-------------|
| 5279  | 18,0     | 20,7    | -1,15 | 0,04105 | 0,425 | 224466_s_at  | Basic leucine zipper transcription factor MafG                | MAFG        |
| 4990  | 8,96     | 10,3    | -1,15 | 0,03830 | 0,419 | 216014_s_at  | Zinc finger, X-linked, duplicated A                           | ZXDA        |
| 3360  | 5,58     | 6,42    | -1,15 | 0,02384 | 0,388 | 1557567_a_at | Hypothetical protein LOC148987                                | LOC148987   |
| 815   | 10,7     | 12,3    | -1,15 | 0,00466 | 0,312 | 1566821_at   | cDNA FLJ32664 fis, clone TEST11000088                         | -           |
| 1776  | 30,1     | 34,6    | -1,15 | 0,01130 | 0,348 | 1554170_a_at | Similar to Hypothetical protein MGC49416                      | LOC255374   |
| 1438  | 8,82     | 10,1    | -1,15 | 0,00871 | 0,331 | 221454_at    | BCL2-related ovarian killer                                   | BOK         |
| 3327  | 9,00     | 10,3    | -1,15 | 0,02363 | 0,388 | 203806_s_at  | Fanconi anemia, complementation group A                       | FANCA       |
| 3675  | 7,83     | 9,00    | -1,15 | 0,02656 | 0,395 | 239248_at    | (clone 33) macronuclear mRNA                                  | -           |
| 1384  | 9,38     | 10,8    | -1,15 | 0,00833 | 0,329 | 238655_at    | Acyl-Coenzyme A dehydrogenase family, member 10               | ACAD10      |
| 129   | 6,19     | 7,12    | -1,15 | 0,00058 | 0,240 | 235624_at    | High density lipoprotein binding protein (vigilin)            | HDLBP       |
| 862   | 30,0     | 34,4    | -1,15 | 0,00497 | 0,313 | 204046_at    | Phospholipase C, beta 2                                       | PLCB2       |
| 5820  | 5,66     | 6,51    | -1,15 | 0,04703 | 0,442 | 229992_at    | Hypothetical LOC149837                                        | LOC149837   |
| 5452  | 10,5     | 12,1    | -1,15 | 0,04301 | 0,431 | 1556422_at   | cDNA FLJ33357 fis, clone BRACE2005189                         | -           |
| 3168  | 15,6     | 17,9    | -1,15 | 0,02248 | 0,387 | 208594_x_at  | Leukocyte immunoglobulin-like receptor subfamily A member 6   | LILRA6      |
| 3895  | 8,94     | 10,3    | -1,15 | 0,02846 | 0,399 | 215491_at    | Myc-related gene from lung cancer                             | MYCL1       |
| 702   | 18,7     | 21,5    | -1,15 | 0,00403 | 0,308 | 208397_x_at  | Potassium inwardly-rectifying channel, subfamily J, member 5  | KCNJ5       |
| 4027  | 16,8     | 19,3    | -1,15 | 0,02951 | 0,400 | 214339_s_at  | Mitogen-activated protein kinase kinase kinase 1              | MAP4K1      |
| 5163  | 16,8     | 19,4    | -1,15 | 0,03978 | 0,421 | 204856_at    | UDP-GlcNAc:betaGal beta-1,3-N-acetylglucosaminyltransferase 3 | B3GNT3      |
| 1497  | 39,3     | 45,2    | -1,15 | 0,00921 | 0,336 | 1554442_at   | Bestrophin 1                                                  | BEST1       |
| 1019  | 15,8     | 18,2    | -1,15 | 0,00590 | 0,316 | 221162_at    | HERV-H LTR-associating 1                                      | HHLA1       |
| 2968  | 23,3     | 26,8    | -1,15 | 0,02085 | 0,384 | 218964_at    | AT rich interactive domain 3B (BRIGHT-like)                   | ARID3B      |
| 1872  | 6,31     | 7,25    | -1,15 | 0,01210 | 0,353 | 238822_at    | Transcribed locus                                             | -           |
| 2075  | 6,34     | 7,28    | -1,15 | 0,01356 | 0,356 | 209999_x_at  | Suppressor of cytokine signaling 1                            | SOCS1       |
| 2353  | 5,43     | 6,24    | -1,15 | 0,01569 | 0,364 | 216914_at    | Cell division cycle 25 homolog C (S. pombe)                   | CDC25C      |
| 4683  | 3,67     | 4,22    | -1,15 | 0,03535 | 0,413 | 1569736_at   | cDNA clone IMAGE:5264099                                      | -           |
| 3423  | 10,5     | 12,0    | -1,15 | 0,02447 | 0,391 | 211165_x_at  | EPH receptor B2                                               | EPHB2       |
| 1306  | 7,52     | 8,64    | -1,15 | 0,00778 | 0,325 | 240784_at    | Chromosome 7 open reading frame 52                            | C7orf52     |
| 5813  | 27,4     | 31,5    | -1,15 | 0,04696 | 0,442 | 226530_at    | BCL2 modifying factor                                         | BMF         |
| 328   | 10,9     | 12,5    | -1,15 | 0,00163 | 0,272 | 240664_at    | Transcribed locus                                             | -           |
| 4182  | 6,94     | 7,97    | -1,15 | 0,03091 | 0,404 | 228626_at    | Transcribed locus                                             | -           |
| 5010  | 1959     | 2249    | -1,15 | 0,03848 | 0,420 | 201090_x_at  | Tubulin, alpha 1b                                             | TUBA1B      |
| 1578  | 17,4     | 20,0    | -1,15 | 0,00981 | 0,340 | 231378_at    | Similar to XP_001095369.1                                     | -           |
| 3395  | 13,7     | 15,7    | -1,15 | 0,02419 | 0,390 | 235483_at    | cDNA FLJ30906 fis, clone FEBRA2006055                         | -           |
| 1647  | 4,54     | 5,21    | -1,15 | 0,01037 | 0,344 | 238872_at    | cDNA FLJ43312 fis, clone NT2RI2012659                         | -           |
| 4408  | 12,1     | 13,9    | -1,15 | 0,03290 | 0,408 | 244808_at    | GRAM domain containing 1A                                     | GRAMD1A     |
| 477   | 12,3     | 14,2    | -1,15 | 0,00256 | 0,289 | 235135_at    | Transcription initiation factor TFIID 30 kD subunit           | TAF10       |
| 3678  | 3,32     | 3,82    | -1,15 | 0,02658 | 0,395 | 215767_at    | Zinc finger protein 804A                                      | ZNF804A     |
| 1286  | 5,17     | 5,93    | -1,15 | 0,00765 | 0,325 | 1564822_at   | cDNA DKFZp434J2111                                            | -           |
| 2194  | 3,93     | 4,51    | -1,15 | 0,01452 | 0,361 | 220545_s_at  | Testis-specific kinase substrate                              | TSKS        |
| 3764  | 3767     | 4324    | -1,15 | 0,02736 | 0,397 | 212788_x_at  | Ferritin, light polypeptide                                   | FTL         |
| 276   | 4,98     | 5,71    | -1,15 | 0,00133 | 0,263 | 210472_at    | Metallothionein 1G                                            | MT1G        |
| 1926  | 20,6     | 23,6    | -1,15 | 0,01253 | 0,355 | 211222_s_at  | huntingtin-associated protein 1 (neuroan 1)                   | HAP1        |
| 1312  | 5,96     | 6,83    | -1,15 | 0,00782 | 0,325 | 238442_at    | Hexamethylene bis-acetamide inducible 1                       | HEXIM1      |
| 2771  | 9,07     | 10,4    | -1,15 | 0,01923 | 0,379 | 207096_at    | Serum amyloid A4, constitutive                                | SAA4        |
| 4823  | 6,88     | 7,89    | -1,15 | 0,03668 | 0,416 | 214556_at    | Somatostatin receptor 4                                       | SSTR4       |
| 5691  | 32,3     | 37,0    | -1,15 | 0,04552 | 0,437 | 215903_s_at  | Microtubule associated serine/threonine kinase 2              | MAST2       |
| 5471  | 6,66     | 7,65    | -1,15 | 0,04325 | 0,432 | 206804_at    | CD3g molecule, gamma (CD3-TCR complex)                        | CD3G        |
| 858   | 4,43     | 5,08    | -1,15 | 0,00496 | 0,313 | 1569681_at   | cDNA clone IMAGE:5209417                                      | -           |
| 135   | 5,54     | 6,35    | -1,15 | 0,00060 | 0,244 | 1555339_at   | RAP1A, member of RAS oncogene family                          | RAP1A       |
| 1116  | 21,7     | 24,9    | -1,15 | 0,00653 | 0,319 | 37796_at     | Leucine rich repeat neuronal 4                                | LRCH4       |
| 3548  | 5,31     | 6,10    | -1,15 | 0,02552 | 0,393 | 214245_at    | Ribosomal protein S14                                         | RPS14       |
| 1315  | 9,12     | 10,5    | -1,15 | 0,00783 | 0,325 | 237188_x_at  | Sperm associated antigen 4-like                               | SPAG4L      |
| 5106  | 6,66     | 7,63    | -1,15 | 0,03929 | 0,421 | 1570007_at   | Leucine rich repeat containing 8 family, member C             | LRRRC8C     |
| 64    | 5,29     | 6,07    | -1,15 | 0,00025 | 0,201 | 1561705_at   | cDNA clone IMAGE:5272626                                      | -           |
| 1955  | 4,48     | 5,13    | -1,15 | 0,01277 | 0,355 | 207008_at    | Interleukin 8 receptor, beta                                  | IL8RB       |
| 3374  | 5,79     | 6,64    | -1,15 | 0,02402 | 0,389 | 222944_s_at  | MAGI family member, X-linked                                  | MAGIX       |
| 1753  | 7,82     | 8,96    | -1,15 | 0,01118 | 0,348 | 220560_at    | Chromosome 11 open reading frame 21                           | C11orf21    |

| Index | Mutated* | Normal* | FC    | P value | FDR** | Probe set    | Description                                                              | Gene symbol      |
|-------|----------|---------|-------|---------|-------|--------------|--------------------------------------------------------------------------|------------------|
| 4878  | 4,63     | 5,31    | -1,15 | 0,03724 | 0,417 | 1560058_at   | Hypothetical gene supported by AK093779                                  | <i>LOC399900</i> |
| 976   | 11,4     | 13,1    | -1,15 | 0,00567 | 0,315 | 204311_at    | ATPase, Na <sup>+</sup> /K <sup>+</sup> transporting, beta 2 polypeptide | <i>ATP1B2</i>    |
| 602   | 7,41     | 8,49    | -1,15 | 0,00335 | 0,303 | 204551_s_at  | Alpha-2-HS-glycoprotein                                                  | <i>AHSG</i>      |
| 3149  | 201      | 231     | -1,15 | 0,02235 | 0,387 | 213153_at    | SET domain containing 1B                                                 | <i>SETD1B</i>    |
| 2387  | 37,8     | 43,3    | -1,15 | 0,01591 | 0,364 | 1556748_x_at | cDNA FLJ39784 fis, clone SPLEN2002314                                    | -                |
| 2375  | 11,9     | 13,6    | -1,15 | 0,01584 | 0,364 | 231619_at    | Transcribed locus                                                        | -                |
| 774   | 6,48     | 7,43    | -1,15 | 0,00443 | 0,311 | 208321_s_at  | Calcium binding protein 1                                                | <i>CABP1</i>     |
| 2571  | 6,82     | 7,82    | -1,15 | 0,01743 | 0,371 | 240358_at    | Transcribed locus                                                        | -                |
| 4473  | 5,03     | 5,76    | -1,15 | 0,03362 | 0,411 | 236213_at    | Similar to Proteasome 26S subunit, non-ATPase, 14                        | -                |
| 2724  | 5,00     | 5,72    | -1,15 | 0,01871 | 0,376 | 1556471_at   | Sex comb on midleg-like 4 (Drosophila)                                   | <i>SCML4</i>     |
| 1539  | 12,1     | 13,9    | -1,15 | 0,00953 | 0,337 | 1569426_at   | cDNA clone IMAGE:4822128                                                 | -                |
| 881   | 4,20     | 4,82    | -1,15 | 0,00510 | 0,313 | 243396_at    | Transcribed locus                                                        | -                |
| 4758  | 455      | 522     | -1,15 | 0,03608 | 0,414 | 62987_r_at   | Calcium channel, voltage-dependent, gamma subunit 4                      | <i>CACNG4</i>    |
| 437   | 4,48     | 5,14    | -1,15 | 0,00231 | 0,288 | 221084_at    | 5-hydroxytryptamine (serotonin) receptor 3B                              | <i>HTR3B</i>     |
| 1587  | 5,44     | 6,23    | -1,15 | 0,00987 | 0,340 | 234362_s_at  | Cytotoxic T-lymphocyte-associated protein 4                              | <i>CTLA4</i>     |
| 3603  | 7,26     | 8,32    | -1,15 | 0,02599 | 0,394 | 241314_at    | Transcribed locus                                                        | -                |
| 3651  | 21,9     | 25,1    | -1,15 | 0,02639 | 0,395 | 206220_s_at  | RAS p21 protein activator 3                                              | <i>RASA3</i>     |
| 2175  | 4,58     | 5,24    | -1,15 | 0,01439 | 0,361 | 237513_at    | Trypsin X3                                                               | <i>TRY1</i>      |
| 3639  | 24,1     | 27,6    | -1,15 | 0,02633 | 0,395 | 226798_at    | BCL2-like 13 (apoptosis facilitator)                                     | <i>BCL2L13</i>   |
| 941   | 11,8     | 13,5    | -1,15 | 0,00538 | 0,313 | 217184_s_at  | Leukocyte tyrosine kinase                                                | <i>LTK</i>       |
| 1888  | 42,6     | 48,8    | -1,15 | 0,01225 | 0,355 | 1556042_s_at | Hypothetical locus LOC338799                                             | <i>LOC338799</i> |
| 1933  | 6,74     | 7,72    | -1,15 | 0,01261 | 0,355 | 224547_at    | Surfactant protein B-binding protein                                     | -                |
| 110   | 3,31     | 3,79    | -1,15 | 0,00044 | 0,221 | 216277_at    | BUB1 budding uninhibited by benzimidazoles 1 homolog (yeast)             | <i>BUB1</i>      |
| 3419  | 7,22     | 8,27    | -1,15 | 0,02443 | 0,391 | 222930_s_at  | Agmatine ureohydrolase (agmatinase)                                      | <i>AGMAT</i>     |
| 1162  | 7,46     | 8,55    | -1,15 | 0,00685 | 0,321 | 1561446_at   | cDNA clone IMAGE:4829179                                                 | -                |
| 4651  | 8,27     | 9,48    | -1,15 | 0,03510 | 0,413 | 207087_x_at  | Ankyrin 1, erythrocytic                                                  | <i>ANK1</i>      |
| 2185  | 10,0     | 11,5    | -1,15 | 0,01448 | 0,361 | 229562_at    | Ribosomal protein L10a                                                   | <i>RPL10A</i>    |
| 1480  | 11,7     | 13,4    | -1,15 | 0,00907 | 0,335 | 232933_at    | KIAA1656 protein                                                         | <i>KIAA1656</i>  |
| 3110  | 18,6     | 21,3    | -1,14 | 0,02197 | 0,386 | 221578_at    | RAS association (RalGDS/AF-6) domain family 4                            | <i>RASSF4</i>    |
| 3201  | 19,5     | 22,4    | -1,14 | 0,02266 | 0,387 | 220510_at    | Rh family, B glycoprotein                                                | <i>RHBG</i>      |
| 2834  | 6,81     | 7,79    | -1,14 | 0,01979 | 0,382 | 236876_at    | H1 histone family, member N, testis-specific                             | <i>H1FNT</i>     |
| 1410  | 7,52     | 8,61    | -1,14 | 0,00852 | 0,330 | 1556962_at   | cDNA FLJ90125 fis, clone HEMBA1007291                                    | -                |
| 1369  | 8,28     | 9,48    | -1,14 | 0,00823 | 0,328 | 232223_at    | Clone 24863 mRNA sequence                                                | -                |
| 1099  | 8,61     | 9,86    | -1,14 | 0,00644 | 0,319 | 1560472_at   | Hypothetical protein LOC338588                                           | <i>LOC338588</i> |
| 4451  | 5,88     | 6,73    | -1,14 | 0,03343 | 0,411 | 234894_at    | Inter-alpha (globulin) inhibitor H5-like                                 | <i>ITIH5L</i>    |
| 5745  | 58,3     | 66,7    | -1,14 | 0,04609 | 0,439 | 219538_at    | WD repeat domain 5B                                                      | <i>WDR5B</i>     |
| 2078  | 4,58     | 5,24    | -1,14 | 0,01357 | 0,356 | 233731_at    | cDNA DKFZp564D123                                                        | -                |
| 4032  | 11,6     | 13,3    | -1,14 | 0,02954 | 0,401 | 229452_at    | Transmembrane protein 88                                                 | <i>TMEM88</i>    |
| 5791  | 6,28     | 7,19    | -1,14 | 0,04668 | 0,441 | 1562247_at   | Hypothetical protein LOC286058                                           | <i>LOC286058</i> |
| 1686  | 37,5     | 42,9    | -1,14 | 0,01066 | 0,345 | 218475_at    | HpaII tiny fragments locus 9C                                            | <i>HTF9C</i>     |
| 3324  | 31,4     | 36,0    | -1,14 | 0,02362 | 0,388 | 219068_x_at  | ATPase family, AAA domain containing 3A                                  | <i>ATAD3A</i>    |
| 2738  | 9,99     | 11,4    | -1,14 | 0,01889 | 0,377 | 222245_s_at  | Fer-1-like 4 (C. elegans)                                                | <i>FER1L4</i>    |
| 5381  | 33,3     | 38,1    | -1,14 | 0,04219 | 0,429 | 209346_s_at  | Phosphatidylinositol 4-kinase type 2 alpha                               | <i>PI4K2A</i>    |
| 5965  | 4,87     | 5,57    | -1,14 | 0,04844 | 0,444 | 215035_at    | Immunoglobulin lambda variable 6-57                                      | <i>IGLV6-57</i>  |
| 6083  | 2505     | 2865    | -1,14 | 0,04966 | 0,446 | 213646_x_at  | Tubulin, alpha 1b                                                        | <i>TUBA1B</i>    |
| 73    | 11,2     | 12,8    | -1,14 | 0,00028 | 0,201 | 236719_at    | Similar to XP_001086437.1                                                | -                |
| 2441  | 23,6     | 27,0    | -1,14 | 0,01632 | 0,365 | 238150_at    | -                                                                        | -                |
| 2131  | 32,5     | 37,1    | -1,14 | 0,01401 | 0,359 | 239026_x_at  | Centaurin, gamma 3                                                       | <i>CENTG3</i>    |
| 487   | 3,30     | 3,77    | -1,14 | 0,00259 | 0,289 | 1563169_at   | Clone IMAGE:4499056, mRNA                                                | -                |
| 6023  | 9,88     | 11,3    | -1,14 | 0,04901 | 0,445 | 207129_at    | Carbonic anhydrase VB, mitochondrial                                     | <i>CA5B</i>      |
| 2812  | 18,6     | 21,2    | -1,14 | 0,01961 | 0,381 | 212545_s_at  | Zinc fingers and homeoboxes 3                                            | <i>ZHX3</i>      |
| 2892  | 11,1     | 12,7    | -1,14 | 0,02030 | 0,383 | 220714_at    | PR domain containing 14                                                  | <i>PRDM14</i>    |
| 2024  | 11,2     | 12,9    | -1,14 | 0,01320 | 0,355 | 238180_at    | Transcribed locus                                                        | -                |
| 3900  | 48,6     | 55,6    | -1,14 | 0,02849 | 0,399 | 223607_x_at  | Zinc finger, SWIM-type containing 1                                      | <i>ZSWIM1</i>    |
| 5879  | 36,9     | 42,2    | -1,14 | 0,04753 | 0,442 | 1569834_at   | cDNA clone IMAGE:5295705                                                 | -                |
| 3251  | 10,1     | 11,5    | -1,14 | 0,02308 | 0,388 | 244701_at    | cDNA FLJ33712 fis, clone BRAWH2008255                                    | -                |
| 1973  | 48,0     | 54,9    | -1,14 | 0,01291 | 0,355 | 227237_x_at  | ATPase family, AAA domain containing 3B                                  | <i>ATAD3B</i>    |

| Index | Mutated* | Normal* | FC    | P value | FDR** | Probe set    | Description                                                                  | Gene symbol      |
|-------|----------|---------|-------|---------|-------|--------------|------------------------------------------------------------------------------|------------------|
| 1572  | 8,99     | 10,3    | -1,14 | 0,00977 | 0,340 | 222712_s_at  | Mucin 13, cell surface associated                                            | <i>MUC13</i>     |
| 5900  | 6,76     | 7,73    | -1,14 | 0,04780 | 0,443 | 242288_s_at  | Elastin microfibril interfacier 2                                            | <i>EMILIN2</i>   |
| 1023  | 4,93     | 5,64    | -1,14 | 0,00593 | 0,316 | 228712_at    | WNK lysine deficient protein kinase 1                                        | <i>WNK1</i>      |
| 708   | 8,59     | 9,81    | -1,14 | 0,00406 | 0,308 | 234376_at    | v-Myc myelocytomatosis viral related oncogene, neuroblastoma derived (avian) | <i>MYCN</i>      |
| 4395  | 9,31     | 10,6    | -1,14 | 0,03276 | 0,407 | 1569206_at   | T-complex 11 (mouse)-like 2                                                  | <i>TCP11L2</i>   |
| 647   | 3,92     | 4,49    | -1,14 | 0,00368 | 0,308 | 217259_at    | cDNA DKFZp586H0123                                                           | -                |
| 2634  | 7,76     | 8,87    | -1,14 | 0,01794 | 0,372 | 230080_at    | Homeobox A4                                                                  | <i>HOXA4</i>     |
| 5682  | 32,6     | 37,2    | -1,14 | 0,04536 | 0,436 | 1569949_at   | G protein-coupled receptor kinase 5                                          | <i>GRK5</i>      |
| 5742  | 21,0     | 24,0    | -1,14 | 0,04607 | 0,439 | 218786_at    | 5'-nucleotidase domain containing 3                                          | <i>NTSDC3</i>    |
| 2987  | 22,7     | 26,0    | -1,14 | 0,02101 | 0,384 | 213633_at    | SH3-domain binding protein 1                                                 | <i>SH3BP1</i>    |
| 878   | 11,4     | 13,1    | -1,14 | 0,00509 | 0,313 | 234688_x_at  | Centrobin, centrosomal BRCA2 interacting protein                             | <i>CNTROB</i>    |
| 1439  | 8,88     | 10,2    | -1,14 | 0,00876 | 0,332 | 237036_at    | F-box protein 10                                                             | <i>FBXO10</i>    |
| 765   | 13,3     | 15,2    | -1,14 | 0,00433 | 0,309 | 243912_x_at  | DNA dC->dU-editing enzyme APOBEC-3F                                          | <i>APOBEC3F</i>  |
| 3083  | 5,14     | 5,87    | -1,14 | 0,02173 | 0,385 | 243114_at    | Transcribed locus                                                            | -                |
| 2592  | 9,88     | 11,3    | -1,14 | 0,01760 | 0,371 | 223635_s_at  | Single stranded DNA binding protein 3                                        | <i>SSBP3</i>     |
| 2292  | 14,2     | 16,2    | -1,14 | 0,01524 | 0,363 | 208224_at    | Homeobox B1                                                                  | <i>HOXB1</i>     |
| 1279  | 7,85     | 8,98    | -1,14 | 0,00761 | 0,325 | 233467_s_at  | Tetraspanin 32                                                               | <i>TSPAN32</i>   |
| 5615  | 12,1     | 13,8    | -1,14 | 0,04479 | 0,436 | 234130_at    | LIM domain binding 3                                                         | <i>LDB3</i>      |
| 1430  | 23,7     | 27,1    | -1,14 | 0,00867 | 0,331 | 214335_at    | Ribosomal protein L18                                                        | <i>RPL18</i>     |
| 1095  | 30,5     | 34,9    | -1,14 | 0,00642 | 0,319 | 206911_at    | Tripartite motif-containing 25                                               | <i>TRIM25</i>    |
| 3987  | 1677     | 1915    | -1,14 | 0,02915 | 0,400 | 211750_x_at  | Tubulin, alpha 1c                                                            | <i>TUBA1C</i>    |
| 47    | 7,10     | 8,12    | -1,14 | 0,00019 | 0,201 | 230725_at    | -                                                                            | -                |
| 953   | 6,81     | 7,79    | -1,14 | 0,00549 | 0,314 | 233217_at    | HSPC102 protein                                                              | -                |
| 104   | 4,20     | 4,80    | -1,14 | 0,00042 | 0,217 | 241449_at    | Similar to XP_001174538.1                                                    | -                |
| 4070  | 14,6     | 16,7    | -1,14 | 0,02986 | 0,401 | 233846_at    | Coiled-coil domain containing 85A                                            | <i>CCDC85A</i>   |
| 2191  | 15,0     | 17,1    | -1,14 | 0,01451 | 0,361 | 235799_at    | Kinetochore-associated protein NSL1 homolog                                  | <i>NSL1</i>      |
| 3643  | 4,92     | 5,62    | -1,14 | 0,02634 | 0,395 | 239668_at    | Transcribed locus                                                            | -                |
| 5778  | 13,2     | 15,1    | -1,14 | 0,04652 | 0,440 | 220427_at    | Obscurin, cytoskeletal calmodulin and titin-interacting RhoGEF               | <i>OBSCN</i>     |
| 4034  | 14,1     | 16,1    | -1,14 | 0,02955 | 0,401 | 220747_at    | HSPC072 protein                                                              | <i>HSPC072</i>   |
| 4187  | 11,5     | 13,2    | -1,14 | 0,03095 | 0,404 | 217373_x_at  | Mdm2 p53 binding protein homolog (mouse)                                     | <i>MDM2</i>      |
| 526   | 2,68     | 3,06    | -1,14 | 0,00281 | 0,291 | 1552430_at   | WD repeat domain 17                                                          | <i>WDR17</i>     |
| 1680  | 14,9     | 17,0    | -1,14 | 0,01060 | 0,345 | 233679_at    | TGF-beta-activated kinase 1-binding protein 1                                | <i>MAP3K7IP1</i> |
| 1428  | 6,99     | 7,99    | -1,14 | 0,00867 | 0,331 | 223967_at    | Angiopoietin-like 6                                                          | <i>ANGPTL6</i>   |
| 3814  | 9,92     | 11,3    | -1,14 | 0,02779 | 0,398 | 211266_s_at  | G protein-coupled receptor 4                                                 | <i>GPR4</i>      |
| 3450  | 17,8     | 20,4    | -1,14 | 0,02470 | 0,391 | 221687_s_at  | Family with sequence similarity 125, member B                                | <i>FAM125B</i>   |
| 3744  | 12,2     | 14,0    | -1,14 | 0,02724 | 0,397 | 207921_x_at  | Paired box 8                                                                 | <i>PAX8</i>      |
| 1285  | 8,02     | 9,16    | -1,14 | 0,00765 | 0,325 | 207457_s_at  | Lymphocyte antigen 6 complex, locus G6D                                      | <i>LY6G6D</i>    |
| 1748  | 10,8     | 12,3    | -1,14 | 0,01116 | 0,348 | 1570239_a_at | Mast cell immunoreceptor signal transducer                                   | <i>MIST</i>      |
| 125   | 3,57     | 4,07    | -1,14 | 0,00057 | 0,240 | 1565780_at   | ATP-binding cassette, sub-family A (ABC1), member 8                          | <i>ABCA8</i>     |
| 2213  | 13,4     | 15,3    | -1,14 | 0,01466 | 0,362 | 234506_at    | cDNA DKFZp564M163                                                            | -                |
| 5269  | 24,0     | 27,4    | -1,14 | 0,04093 | 0,425 | 205247_at    | Notch homolog 4 (Drosophila)                                                 | <i>NOTCH4</i>    |
| 4622  | 12,1     | 13,9    | -1,14 | 0,03488 | 0,412 | 211660_at    | POU class 2 homeobox 2                                                       | <i>POU2F2</i>    |
| 2391  | 12,2     | 14,0    | -1,14 | 0,01595 | 0,365 | 211554_s_at  | Apoptotic peptidase activating factor 1                                      | <i>APAF1</i>     |
| 3628  | 4,76     | 5,43    | -1,14 | 0,02621 | 0,395 | 205359_at    | A kinase (PRKA) anchor protein 6                                             | <i>AKAP6</i>     |
| 2448  | 6,38     | 7,28    | -1,14 | 0,01640 | 0,366 | 239165_at    | Transcribed locus                                                            | -                |
| 952   | 12,7     | 14,5    | -1,14 | 0,00547 | 0,314 | 232310_at    | Hypothetical LOC388889                                                       | <i>LOC388889</i> |
| 5573  | 16,7     | 19,1    | -1,14 | 0,04439 | 0,435 | 241201_at    | KIAA1530 protein                                                             | <i>KIAA1530</i>  |
| 3637  | 7,62     | 8,69    | -1,14 | 0,02629 | 0,395 | 227343_at    | Myeloma overexpressed gene (hypothetical protein LOC26579)                   | <i>MYEOV</i>     |
| 1367  | 9,41     | 10,7    | -1,14 | 0,00822 | 0,328 | 241490_s_at  | PiggyBac transposable element derived 2                                      | <i>PGBD2</i>     |
| 5409  | 4,00     | 4,57    | -1,14 | 0,04249 | 0,429 | 1558452_at   | Transmembrane protein 144                                                    | <i>TMEM144</i>   |
| 1434  | 5,36     | 6,12    | -1,14 | 0,00869 | 0,331 | 239909_at    | ADAMTS-like 1                                                                | <i>ADAMTSL1</i>  |
| 3     | 3,29     | 3,76    | -1,14 | 0,00001 | 0,099 | 243460_at    | Transcribed locus                                                            | -                |
| 4106  | 23,5     | 26,8    | -1,14 | 0,03018 | 0,402 | 216694_at    | -                                                                            | -                |
| 876   | 15,3     | 17,5    | -1,14 | 0,00505 | 0,313 | 240305_at    | cDNA clone IMAGE:5285563                                                     | -                |
| 6045  | 6,05     | 6,90    | -1,14 | 0,04924 | 0,445 | 1554376_s_at | Protein-tyrosine phosphatase-like member A                                   | <i>PTPLA</i>     |
| 535   | 12,2     | 13,9    | -1,14 | 0,00286 | 0,292 | 220490_at    | -                                                                            | -                |
| 2619  | 12,6     | 14,3    | -1,14 | 0,01780 | 0,371 | 239157_at    | Zinc finger and SCAN domain containing 12-like 1                             | <i>ZSCAN12L1</i> |

| Index | Mutated* | Normal* | FC    | P value | FDR** | Probe set    | Description                                                  | Gene symbol      |
|-------|----------|---------|-------|---------|-------|--------------|--------------------------------------------------------------|------------------|
| 105   | 5886     | 6713    | -1,14 | 0,00042 | 0,217 | 1553569_at   | Phosphatidylinositol glycan anchor biosynthesis, class F     | <i>PIGF</i>      |
| 2855  | 5,55     | 6,33    | -1,14 | 0,02003 | 0,383 | 231415_at    | Williams Beuren syndrome chromosome region 22                | <i>WBSCR22</i>   |
| 3239  | 22,3     | 25,4    | -1,14 | 0,02298 | 0,388 | 244157_x_at  | -                                                            | -                |
| 751   | 5,21     | 5,94    | -1,14 | 0,00425 | 0,308 | 238817_at    | RIMS binding protein 2                                       | <i>RIMBP2</i>    |
| 1580  | 5,66     | 6,45    | -1,14 | 0,00983 | 0,340 | 206225_at    | Zinc finger protein 507                                      | <i>ZNF507</i>    |
| 775   | 5,42     | 6,18    | -1,14 | 0,00443 | 0,311 | 241241_at    | Ribosomal protein S14                                        | <i>RPS14</i>     |
| 5214  | 26,5     | 30,2    | -1,14 | 0,04027 | 0,422 | 234471_s_at  | Nuclear receptor coactivator 5                               | <i>NCOA5</i>     |
| 4924  | 36,4     | 41,5    | -1,14 | 0,03775 | 0,419 | 211512_s_at  | Opioid growth factor receptor                                | <i>OGFR</i>      |
| 673   | 8,48     | 9,67    | -1,14 | 0,00386 | 0,308 | 217658_at    | THAP domain containing, apoptosis associated protein 3       | <i>THAP3</i>     |
| 1840  | 11,5     | 13,1    | -1,14 | 0,01183 | 0,351 | 229148_at    | -                                                            | -                |
| 2381  | 5,51     | 6,28    | -1,14 | 0,01587 | 0,364 | 205605_at    | Homeobox D9                                                  | <i>HOXD9</i>     |
| 622   | 18,7     | 21,3    | -1,14 | 0,00353 | 0,308 | 1561019_at   | Full length insert cDNA clone ZD95A07                        | -                |
| 3061  | 4,99     | 5,69    | -1,14 | 0,02154 | 0,385 | 204830_x_at  | Pregnancy specific beta-1-glycoprotein 5                     | <i>PSG5</i>      |
| 1344  | 8,55     | 9,75    | -1,14 | 0,00806 | 0,328 | 237595_at    | LIM homeobox transcription factor 1, alpha                   | <i>LMX1A</i>     |
| 1778  | 17,7     | 20,2    | -1,14 | 0,01132 | 0,348 | 206467_x_at  | Tumor necrosis factor receptor superfamily, member 6b, decoy | <i>TNFRSF6B</i>  |
| 226   | 3,65     | 4,16    | -1,14 | 0,00105 | 0,250 | 1565306_a_at | Solute carrier family 8, member 1                            | <i>SLC8A1</i>    |
| 1549  | 17,9     | 20,3    | -1,14 | 0,00956 | 0,337 | 234647_at    | Kv channel interacting protein 3, calsenilin                 | <i>KCNIP3</i>    |
| 3770  | 7,29     | 8,31    | -1,14 | 0,02739 | 0,397 | 215449_at    | Benzodiazapine receptor (peripheral)-like 1                  | <i>BZRPL1</i>    |
| 2346  | 9,66     | 11,0    | -1,14 | 0,01566 | 0,364 | 205589_at    | Myosin, light chain 3, alkali; ventricular, skeletal, slow   | <i>MYL3</i>      |
| 4887  | 5,92     | 6,74    | -1,14 | 0,03737 | 0,418 | 208360_s_at  | -                                                            | -                |
| 3076  | 8,66     | 9,86    | -1,14 | 0,02169 | 0,385 | 220684_at    | T-box 21                                                     | <i>TBX21</i>     |
| 432   | 4,44     | 5,06    | -1,14 | 0,00228 | 0,288 | 1558995_at   | Zinc finger protein 547                                      | <i>ZNF547</i>    |
| 1104  | 6,56     | 7,47    | -1,14 | 0,00646 | 0,319 | 243344_at    | Clone IMAGE:5194137, mRNA                                    | -                |
| 3115  | 97,5     | 111     | -1,14 | 0,02203 | 0,387 | 53912_at     | Sorting nexin 11                                             | <i>SNX11</i>     |
| 189   | 3,12     | 3,56    | -1,14 | 0,00088 | 0,244 | 211491_at    | Adrenergic, alpha-1A-, receptor                              | <i>ADRA1A</i>    |
| 741   | 7,09     | 8,08    | -1,14 | 0,00421 | 0,308 | 229224_x_at  | Hypothetical LOC643085                                       | <i>LOC643085</i> |
| 1662  | 7,24     | 8,25    | -1,14 | 0,01049 | 0,345 | 220727_at    | Potassium channel, subfamily K, member 10                    | <i>KCNK10</i>    |
| 791   | 11,9     | 13,6    | -1,14 | 0,00452 | 0,311 | 206798_x_at  | Deleted in lung and esophageal cancer 1                      | <i>DLEC1</i>     |
| 224   | 11,6     | 13,2    | -1,14 | 0,00104 | 0,250 | 220379_at    | Fascin homolog 3, actin-bundling protein, testicular         | <i>FSCN3</i>     |
| 2235  | 8,64     | 9,84    | -1,14 | 0,01485 | 0,363 | 233137_at    | Clone IMAGE:121687 mRNA sequence                             | -                |
| 1997  | 4,54     | 5,17    | -1,14 | 0,01306 | 0,355 | 217677_at    | Pleckstrin homology domain-containing family A member 2      | <i>PLEKHA2</i>   |
| 2003  | 19,8     | 22,6    | -1,14 | 0,01307 | 0,355 | 1555359_at   | Phosphatidylinositol glycan anchor biosynthesis, class Q     | <i>PIGQ</i>      |
| 2146  | 5,76     | 6,56    | -1,14 | 0,01412 | 0,360 | 229993_at    | Zinc finger, CCHC domain containing 3                        | <i>ZCCHC3</i>    |
| 428   | 8,07     | 9,19    | -1,14 | 0,00226 | 0,288 | 232577_at    | Hypothetical protein LOC145945                               | <i>LOC145945</i> |
| 222   | 8,62     | 9,81    | -1,14 | 0,00103 | 0,250 | 231893_at    | KIAA1755 protein                                             | <i>KIAA1755</i>  |
| 2040  | 4,57     | 5,20    | -1,14 | 0,01328 | 0,355 | 209738_x_at  | Pregnancy specific beta-1-glycoprotein 6                     | <i>PSG6</i>      |
| 1453  | 4,04     | 4,60    | -1,14 | 0,00889 | 0,334 | 1570650_at   | Cysteine conjugate-beta lyase; cytoplasmic                   | <i>CCBL1</i>     |
| 1609  | 5,99     | 6,82    | -1,14 | 0,01008 | 0,342 | 234811_at    | Centromere protein N                                         | <i>CENPN</i>     |
| 5638  | 50,6     | 57,6    | -1,14 | 0,04499 | 0,436 | 202140_s_at  | CDC-like kinase 3                                            | <i>CLK3</i>      |
| 1120  | 27,8     | 31,6    | -1,14 | 0,00654 | 0,319 | 239720_at    | Similar to RIKEN cDNA B230118G17 gene                        | <i>MGC19604</i>  |
| 1361  | 10,3     | 11,7    | -1,14 | 0,00820 | 0,328 | 234499_at    | cDNA DKFZp566K203                                            | -                |
| 2790  | 10,2     | 11,6    | -1,14 | 0,01940 | 0,380 | 220476_s_at  | Chromosome 1 open reading frame 183                          | <i>C1orf183</i>  |
| 867   | 16,6     | 18,9    | -1,14 | 0,00501 | 0,313 | 231743_at    | Wingless-type MMTV integration site family, member 3         | <i>WNT3</i>      |
| 2088  | 5,61     | 6,38    | -1,14 | 0,01362 | 0,356 | 237324_s_at  | Hexokinase domain containing 1                               | <i>HKDC1</i>     |
| 2099  | 6,05     | 6,88    | -1,14 | 0,01375 | 0,358 | 236852_at    | F-box protein 43                                             | <i>FBXO43</i>    |
| 1820  | 23,9     | 27,1    | -1,14 | 0,01172 | 0,351 | 1555754_s_at | Atrophin 1                                                   | <i>ATN1</i>      |
| 3299  | 6,02     | 6,85    | -1,14 | 0,02350 | 0,388 | 231877_at    | RNA (guanine-9-) methyltransferase domain containing 2       | <i>RG9MTD2</i>   |
| 6037  | 8,06     | 9,17    | -1,14 | 0,04915 | 0,445 | 234696_at    | Similar to Testicular serine protease 2                      | <i>LOC138652</i> |
| 3380  | 3,55     | 4,04    | -1,14 | 0,02405 | 0,389 | 210531_at    | Nuclear receptor subfamily 2, group C, member 1              | <i>NR2C1</i>     |
| 4122  | 6,96     | 7,92    | -1,14 | 0,03031 | 0,402 | 229548_at    | Similar to UNC-84 homolog B                                  | -                |
| 889   | 5,48     | 6,24    | -1,14 | 0,00513 | 0,313 | 237599_at    | Similar to Finger protein 286                                | -                |
| 2599  | 11,8     | 13,5    | -1,14 | 0,01765 | 0,371 | 1561133_at   | Full length insert cDNA clone ZD60A10                        | -                |
| 1048  | 11,8     | 13,5    | -1,14 | 0,00612 | 0,319 | 1562256_at   | NLR family, pyrin domain containing 1                        | <i>NLRP1</i>     |
| 3848  | 163      | 185     | -1,14 | 0,02810 | 0,399 | 201805_at    | Protein kinase, AMP-activated, gamma 1 non-catalytic subunit | <i>PRKAG1</i>    |
| 3009  | 10,1     | 11,5    | -1,14 | 0,02118 | 0,385 | 241820_at    | RAP1 interacting factor homolog (yeast)                      | <i>RIF1</i>      |
| 2456  | 10,6     | 12,0    | -1,14 | 0,01647 | 0,366 | 224498_x_at  | Axin 2 (conductin, axil)                                     | <i>AXIN2</i>     |
| 1822  | 11,0     | 12,5    | -1,14 | 0,01173 | 0,351 | 232400_at    | SEC14-like 2 (S. cerevisiae)                                 | <i>SEC14L2</i>   |

| Index | Mutated* | Normal* | FC    | P value | FDR** | Probe set    | Description                                                       | Gene symbol |
|-------|----------|---------|-------|---------|-------|--------------|-------------------------------------------------------------------|-------------|
| 3335  | 39,3     | 44,7    | -1,14 | 0,02366 | 0,388 | 201796_s_at  | Valyl-tRNA synthetase                                             | VARS        |
| 4505  | 3,16     | 3,59    | -1,14 | 0,03391 | 0,412 | 236575_at    | cDNA clone IMAGE:4823793                                          | -           |
| 1406  | 4,46     | 5,07    | -1,14 | 0,00850 | 0,330 | 1556536_at   | HCG2044152 protein                                                | -           |
| 786   | 6,18     | 7,03    | -1,14 | 0,00449 | 0,311 | 1565580_s_at | TatD DNase domain containing 2                                    | TATDN2      |
| 163   | 26,1     | 29,7    | -1,14 | 0,00075 | 0,244 | 210043_at    | FERM domain containing 8                                          | FRMD8       |
| 1378  | 19,2     | 21,9    | -1,14 | 0,00830 | 0,329 | 240587_x_at  | Transcribed locus                                                 | -           |
| 4110  | 5,61     | 6,38    | -1,14 | 0,03021 | 0,402 | 223987_at    | Chordin-like 2                                                    | CHRD2       |
| 1830  | 4,63     | 5,26    | -1,14 | 0,01179 | 0,351 | 231051_at    | Full length insert cDNA clone ZD51E06                             | -           |
| 4802  | 40,6     | 46,2    | -1,14 | 0,03644 | 0,415 | 89476_r_at   | Aminopeptidase-like 1                                             | NPEP1       |
| 4975  | 9,94     | 11,3    | -1,14 | 0,03818 | 0,419 | 211900_x_at  | CD6 molecule                                                      | CD6         |
| 1779  | 30,8     | 35,0    | -1,14 | 0,01134 | 0,349 | 241918_at    | Transmembrane protein 16G                                         | TMEM16G     |
| 758   | 6,49     | 7,37    | -1,14 | 0,00428 | 0,308 | 243058_at    | -                                                                 | -           |
| 3244  | 8,02     | 9,11    | -1,14 | 0,02300 | 0,388 | 222301_at    | Chromosome 1 open reading frame 61                                | C1orf61     |
| 3203  | 8,26     | 9,39    | -1,14 | 0,02268 | 0,387 | 1554382_at   | Hypothetical protein LOC200261                                    | LOC200261   |
| 5713  | 8,05     | 9,15    | -1,14 | 0,04574 | 0,438 | 235863_at    | Junctional sarcoplasmic reticulum protein 1                       | JSRP1       |
| 1522  | 6,54     | 7,44    | -1,14 | 0,00940 | 0,337 | 239947_at    | Transcribed locus                                                 | -           |
| 124   | 7,37     | 8,37    | -1,14 | 0,00057 | 0,240 | 242651_at    | Transcribed locus                                                 | -           |
| 2167  | 4,35     | 4,94    | -1,14 | 0,01434 | 0,361 | 219393_s_at  | v-AKT murine thymoma viral oncogene homolog                       | AKT3        |
| 5401  | 5,34     | 6,07    | -1,14 | 0,04236 | 0,429 | 230170_at    | Oncostatin M                                                      | OSM         |
| 3594  | 58,0     | 65,9    | -1,14 | 0,02592 | 0,394 | 202958_at    | Protein tyrosine phosphatase, non-receptor type 9                 | PTPN9       |
| 1987  | 4,28     | 4,87    | -1,14 | 0,01298 | 0,355 | 1555626_a_at | Signaling lymphocytic activation molecule family member 1         | SLAMF1      |
| 1417  | 3,57     | 4,06    | -1,14 | 0,00858 | 0,331 | 223550_s_at  | Carbonic anhydrase X                                              | CA10        |
| 776   | 4,59     | 5,22    | -1,14 | 0,00443 | 0,311 | 216471_x_at  | Synovial sarcoma, X breakpoint 2                                  | SSX2        |
| 3233  | 7,37     | 8,38    | -1,14 | 0,02291 | 0,388 | 1561960_at   | Hypothetical gene supported by AB067507                           | LOC390627   |
| 3722  | 25,2     | 28,7    | -1,14 | 0,02702 | 0,397 | 221306_at    | G protein-coupled receptor 27                                     | GPR27       |
| 2216  | 7,68     | 8,73    | -1,14 | 0,01468 | 0,362 | 1570133_at   | Clone IMAGE:5172579, mRNA                                         | -           |
| 811   | 11,0     | 12,5    | -1,14 | 0,00462 | 0,311 | 241437_s_at  | EP400 N-terminal like                                             | EP400NL     |
| 1839  | 4,57     | 5,19    | -1,14 | 0,01183 | 0,351 | 231589_at    | -                                                                 | -           |
| 3060  | 16,5     | 18,8    | -1,14 | 0,02154 | 0,385 | 207004_at    | B-cell CLL/lymphoma 2                                             | BCL2        |
| 2042  | 17,0     | 19,3    | -1,14 | 0,01328 | 0,355 | 1559629_at   | Clone IMAGE:5744974, mRNA                                         | -           |
| 782   | 17,7     | 20,1    | -1,14 | 0,00448 | 0,311 | 1559461_at   | Clone IMAGE:3852236, mRNA                                         | -           |
| 491   | 3,43     | 3,89    | -1,14 | 0,00262 | 0,289 | 1569746_s_at | cDNA clone IMAGE:5265020                                          | -           |
| 3803  | 14,8     | 16,9    | -1,14 | 0,02770 | 0,398 | 1568743_at   | ATPase, Class V, type 10A                                         | ATP10A      |
| 1659  | 6,12     | 6,96    | -1,14 | 0,01048 | 0,345 | 1553757_at   | IQ motif containing G                                             | IQCG        |
| 3447  | 35,2     | 40,0    | -1,14 | 0,02467 | 0,391 | 1556479_at   | cDNA FLJ40474 fis, clone TESTI2042928                             | -           |
| 3560  | 4,90     | 5,57    | -1,14 | 0,02570 | 0,394 | 222520_s_at  | Intraflagellar transport 57 homolog (Chlamydomonas)               | IFT57       |
| 728   | 4,43     | 5,03    | -1,14 | 0,00416 | 0,308 | 1561221_x_at | Hypothetical protein LOC728099                                    | LOC728099   |
| 3476  | 7,27     | 8,25    | -1,14 | 0,02496 | 0,392 | 206353_at    | Cytochrome c oxidase subunit VIa polypeptide 2                    | COX6A2      |
| 2091  | 6,50     | 7,39    | -1,14 | 0,01365 | 0,357 | 240590_at    | Hypothetical protein LOC348761                                    | LOC348761   |
| 503   | 4,79     | 5,44    | -1,14 | 0,00267 | 0,289 | 239308_at    | Dual-specificity tyrosine-(Y)-phosphorylation regulated kinase 1A | DYRK1A      |
| 2102  | 33,6     | 38,1    | -1,14 | 0,01378 | 0,358 | 213323_s_at  | Zinc finger CCCH-type containing 7B                               | ZC3H7B      |
| 5239  | 7,25     | 8,23    | -1,14 | 0,04059 | 0,423 | 229622_at    | Family with sequence similarity 132, member B                     | FAM132B     |
| 1134  | 17,3     | 19,7    | -1,14 | 0,00663 | 0,319 | 1568667_s_at | Lipid storage droplet protein 5                                   | LSDP5       |
| 3490  | 3,98     | 4,51    | -1,14 | 0,02509 | 0,392 | 244489_at    | -                                                                 | -           |
| 4609  | 7,10     | 8,06    | -1,14 | 0,03482 | 0,412 | 232464_at    | Tripartite motif-containing pseudogene 1                          | TRIMP1      |
| 527   | 5,26     | 5,97    | -1,14 | 0,00281 | 0,291 | 220227_at    | Cadherin 4, type 1, R-Cadherin (retinal)                          | CDH4        |
| 5627  | 7,76     | 8,80    | -1,14 | 0,04492 | 0,436 | 223510_at    | Neuropilin 2                                                      | NRP2        |
| 677   | 5,88     | 6,67    | -1,14 | 0,00389 | 0,308 | 220343_at    | Phosphodiesterase 7B                                              | PDE7B       |
| 2389  | 12,4     | 14,1    | -1,13 | 0,01592 | 0,364 | 210442_at    | Interleukin 1 receptor-like 1                                     | IL1RL1      |
| 2336  | 5,19     | 5,89    | -1,13 | 0,01559 | 0,364 | 216747_at    | Amyloid beta precursor protein-binding, family B, member 2        | APBB2       |
| 4225  | 9,61     | 10,9    | -1,13 | 0,03132 | 0,405 | 1564373_a_at | Hypothetical protein LOC283887                                    | LOC283887   |
| 5184  | 4,51     | 5,12    | -1,13 | 0,03996 | 0,421 | 235325_at    | Spastic paraplegia 7 protein                                      | SPG7        |
| 382   | 2,90     | 3,29    | -1,13 | 0,00199 | 0,284 | 1552765_x_at | Transmembrane protein 67                                          | TMEM67      |
| 5259  | 24,4     | 27,7    | -1,13 | 0,04080 | 0,424 | 206926_s_at  | Interleukin 11                                                    | IL11        |
| 5893  | 51,7     | 58,7    | -1,13 | 0,04767 | 0,442 | 227035_x_at  | Retinitis pigmentosa 9 pseudogene                                 | LOC441212   |
| 5140  | 6,07     | 6,89    | -1,13 | 0,03958 | 0,421 | 216327_s_at  | Sialic acid binding Ig-like lectin 8                              | SIGLEC8     |
| 5583  | 3,18     | 3,60    | -1,13 | 0,04452 | 0,436 | 235230_at    | cDNA FLJ34317 fis, clone FEBRA2008475                             | -           |

| Index | Mutated* | Normal* | FC    | P value | FDR** | Probe set    | Description                                              | Gene symbol      |
|-------|----------|---------|-------|---------|-------|--------------|----------------------------------------------------------|------------------|
| 2921  | 5,29     | 6,01    | -1,13 | 0,02049 | 0,383 | 220095_at    | Chromosome 9 open reading frame 39                       | <i>C9orf39</i>   |
| 1893  | 6,19     | 7,02    | -1,13 | 0,01231 | 0,355 | 216117_at    | Exosome component 2                                      | <i>EXOSC2</i>    |
| 4976  | 12,0     | 13,6    | -1,13 | 0,03819 | 0,419 | 239415_at    | Microtubule-associated protein 9                         | <i>MAP9</i>      |
| 3491  | 8,49     | 9,63    | -1,13 | 0,02510 | 0,392 | 243083_at    | Hypothetical gene supported by BC040831                  | <i>LOC401351</i> |
| 2356  | 6,55     | 7,43    | -1,13 | 0,01572 | 0,364 | 238014_at    | -                                                        | -                |
| 4853  | 12,0     | 13,6    | -1,13 | 0,03698 | 0,417 | 1567257_at   | Olfactory receptor, family 1, subfamily J, member 2      | <i>OR1J2</i>     |
| 2932  | 11,0     | 12,5    | -1,13 | 0,02056 | 0,383 | 234099_at    | cDNA FLJ13494 fis, clone PLACE1004384                    | -                |
| 1679  | 7,80     | 8,84    | -1,13 | 0,01060 | 0,345 | 235865_at    | CUG triplet repeat, RNA binding protein 1                | <i>CUGBP1</i>    |
| 3161  | 14,0     | 15,9    | -1,13 | 0,02243 | 0,387 | 232988_at    | KIAA0182 protein                                         | <i>KIAA0182</i>  |
| 3158  | 7,53     | 8,54    | -1,13 | 0,02241 | 0,387 | 206178_at    | Phospholipase A2, group V                                | <i>PLA2G5</i>    |
| 2559  | 7,22     | 8,19    | -1,13 | 0,01736 | 0,371 | 1556453_at   | cDNA FLJ35971 fis, clone TESTI2013257                    | -                |
| 507   | 6,99     | 7,93    | -1,13 | 0,00269 | 0,289 | 1562818_at   | Nicotinamide nucleotide adenyltransferase 2              | <i>NMNAT2</i>    |
| 164   | 10,7     | 12,2    | -1,13 | 0,00076 | 0,244 | 1554759_at   | SNAP25-interacting protein                               | <i>SNIP</i>      |
| 1444  | 12,5     | 14,2    | -1,13 | 0,00878 | 0,332 | 217622_at    | Rhomboid domain containing 3                             | <i>RHBDD3</i>    |
| 2604  | 10,5     | 11,9    | -1,13 | 0,01768 | 0,371 | 206802_at    | Paired box 5                                             | <i>PAX5</i>      |
| 4881  | 18,1     | 20,5    | -1,13 | 0,03733 | 0,418 | 229668_at    | Hypothetical protein LOC90393                            | <i>LOC90393</i>  |
| 3968  | 4,04     | 4,58    | -1,13 | 0,02898 | 0,399 | 236660_at    | cDNA FLJ45600 fis, clone BRTHA3020369                    | -                |
| 3515  | 23,2     | 26,3    | -1,13 | 0,02525 | 0,392 | 1553444_a_at | Chromosome 1 open reading frame 127                      | <i>C1orf127</i>  |
| 4829  | 66,3     | 75,1    | -1,13 | 0,03679 | 0,416 | 221956_at    | Leucine rich repeat neuronal 4                           | <i>LRCH4</i>     |
| 1274  | 6,11     | 6,93    | -1,13 | 0,00758 | 0,325 | 1553936_a_at | Hypothetical protein MGC2848                             | <i>MGC2848</i>   |
| 5177  | 10,7     | 12,1    | -1,13 | 0,03990 | 0,421 | 218600_at    | LIM domain containing 2                                  | <i>LIMD2</i>     |
| 1127  | 20,4     | 23,1    | -1,13 | 0,00657 | 0,319 | 242145_at    | Transcribed locus                                        | -                |
| 635   | 3,10     | 3,52    | -1,13 | 0,00361 | 0,308 | 240138_at    | Transcribed locus                                        | -                |
| 650   | 6,66     | 7,55    | -1,13 | 0,00369 | 0,308 | 1565559_at   | MAGI family member, X-linked                             | <i>MAGIX</i>     |
| 1817  | 5,90     | 6,69    | -1,13 | 0,01171 | 0,351 | 1563045_at   | cDNA clone IMAGE:4827232                                 | -                |
| 1347  | 17,5     | 19,8    | -1,13 | 0,00807 | 0,328 | 211791_s_at  | Potassium channel shaker chain beta 2                    | <i>KCNAB2</i>    |
| 2499  | 4,80     | 5,44    | -1,13 | 0,01684 | 0,367 | 243238_at    | Phosphorylase, glycogen; brain                           | <i>PYGB</i>      |
| 4554  | 6,32     | 7,16    | -1,13 | 0,03442 | 0,412 | 230827_at    | Similar to HBxAg transactivated protein 2 isoform 5      | -                |
| 4774  | 7,27     | 8,23    | -1,13 | 0,03621 | 0,414 | 207346_at    | Syntaxin 2                                               | <i>STX2</i>      |
| 1353  | 5,82     | 6,59    | -1,13 | 0,00812 | 0,328 | 221380_at    | Mahlavu hepatocellular carcinoma                         | <i>HHCM</i>      |
| 12    | 2,95     | 3,34    | -1,13 | 0,00004 | 0,180 | 242682_at    | -                                                        | -                |
| 415   | 3,55     | 4,02    | -1,13 | 0,00219 | 0,286 | 230910_s_at  | Lymphocyte antigen 6 complex, locus K                    | <i>LY6K</i>      |
| 3430  | 34,9     | 39,5    | -1,13 | 0,02455 | 0,391 | 223462_at    | Transmembrane protein 175                                | <i>TMEM175</i>   |
| 1804  | 12,4     | 14,0    | -1,13 | 0,01162 | 0,351 | 208489_at    | Gap junction protein, alpha 8, 50kDa                     | <i>GJA8</i>      |
| 3706  | 10,3     | 11,6    | -1,13 | 0,02680 | 0,395 | 206892_at    | Anti-Mullerian hormone receptor, type II                 | <i>AMHR2</i>     |
| 3757  | 23,0     | 26,0    | -1,13 | 0,02731 | 0,397 | 224125_at    | Pleckstrin homology domain containing, family N member 1 | <i>PLEKHN1</i>   |
| 1002  | 4,93     | 5,58    | -1,13 | 0,00579 | 0,316 | 1560862_at   | cDNA DKFZp434i235                                        | -                |
| 1731  | 6,98     | 7,91    | -1,13 | 0,01105 | 0,348 | 241725_at    | E2F transcription factor 7                               | <i>E2F7</i>      |
| 1671  | 20,5     | 23,2    | -1,13 | 0,01055 | 0,345 | 209559_at    | Huntingtin interacting protein 1 related                 | <i>HIP1R</i>     |
| 2726  | 13,1     | 14,8    | -1,13 | 0,01874 | 0,376 | 231360_at    | Chromosome 20 open reading frame 141                     | <i>C20orf141</i> |
| 348   | 11,1     | 12,5    | -1,13 | 0,00178 | 0,278 | 244152_at    | Transcribed locus                                        | -                |
| 2402  | 6,36     | 7,20    | -1,13 | 0,01602 | 0,365 | 211195_s_at  | Tumor protein p63                                        | <i>TP63</i>      |
| 4341  | 7,62     | 8,63    | -1,13 | 0,03233 | 0,407 | 208191_x_at  | Pregnancy specific beta-1-glycoprotein 4                 | <i>PSG4</i>      |
| 5431  | 33,2     | 37,6    | -1,13 | 0,04279 | 0,431 | 219997_s_at  | COP9 constitutive photomorphogenic homolog subunit 7B    | <i>COPS7B</i>    |
| 4154  | 10,8     | 12,2    | -1,13 | 0,03064 | 0,403 | 216892_at    | Immunoglobulin heavy constant gamma 1 (G1m marker)       | <i>IGHG1</i>     |
| 295   | 3,73     | 4,23    | -1,13 | 0,00144 | 0,263 | 1562983_at   | Hypothetical gene supported by BC039667                  | <i>LOC441025</i> |
| 4048  | 7,17     | 8,12    | -1,13 | 0,02967 | 0,401 | 206154_at    | Retinaldehyde binding protein 1                          | <i>RLBP1</i>     |
| 652   | 3,43     | 3,88    | -1,13 | 0,00371 | 0,308 | 235777_at    | Ankyrin repeat domain 44                                 | <i>ANKRD44</i>   |
| 2943  | 7,51     | 8,50    | -1,13 | 0,02063 | 0,383 | 243429_at    | Transcribed locus                                        | -                |
| 1372  | 4,07     | 4,61    | -1,13 | 0,00824 | 0,328 | 243073_at    | Transcribed locus                                        | -                |
| 5354  | 161      | 183     | -1,13 | 0,04201 | 0,429 | 215399_s_at  | Amplified in osteosarcoma                                | <i>OS9</i>       |
| 2337  | 6,34     | 7,17    | -1,13 | 0,01560 | 0,364 | 237715_at    | AT-hook transcription factor                             | <i>AKNA</i>      |
| 1122  | 5,16     | 5,84    | -1,13 | 0,00655 | 0,319 | 236171_at    | ATPase, Ca++ transporting, type 2C, member 2             | <i>ATP2C2</i>    |
| 759   | 8,24     | 9,32    | -1,13 | 0,00429 | 0,308 | 219144_at    | Dual specificity phosphatase 26 (putative)               | <i>DUSP26</i>    |
| 83    | 4,35     | 4,92    | -1,13 | 0,00031 | 0,201 | 229791_at    | Acyltransferase like 1                                   | <i>AYTL1</i>     |
| 1468  | 7,96     | 9,01    | -1,13 | 0,00898 | 0,334 | 237151_s_at  | Similar to Hypothetical protein                          | <i>MGC33657</i>  |
| 2413  | 26,3     | 29,8    | -1,13 | 0,01612 | 0,365 | 230345_at    | Transcribed locus                                        | -                |



| Index | Mutated* | Normal* | FC    | P value | FDR** | Probe set    | Description                                                           | Gene symbol      |
|-------|----------|---------|-------|---------|-------|--------------|-----------------------------------------------------------------------|------------------|
| 1368  | 7,93     | 8,97    | -1,13 | 0,00823 | 0,328 | 232813_s_at  | Golgin-like protein                                                   | <i>GOLGA</i>     |
| 5321  | 34,0     | 38,4    | -1,13 | 0,04158 | 0,427 | 1552863_a_at | Calcium channel, voltage-dependent, gamma subunit 6                   | <i>CACNG6</i>    |
| 1373  | 3,55     | 4,01    | -1,13 | 0,00825 | 0,329 | 220834_at    | Membrane-spanning 4-domains, subfamily A, member 12                   | <i>MS4A12</i>    |
| 377   | 4,99     | 5,65    | -1,13 | 0,00196 | 0,284 | 1561472_at   | Hypothetical protein LOC728805                                        | <i>LOC728805</i> |
| 3017  | 18,4     | 20,8    | -1,13 | 0,02126 | 0,385 | 47105_at     | Dihydrouridine synthase 2-like, SMM1 homolog ( <i>S. cerevisiae</i> ) | <i>DUS2L</i>     |
| 2513  | 18,4     | 20,8    | -1,13 | 0,01691 | 0,368 | 220573_at    | Kallikrein-related peptidase 14                                       | <i>KLK14</i>     |
| 3684  | 13,0     | 14,7    | -1,13 | 0,02660 | 0,395 | 1552845_at   | Claudin 15                                                            | <i>CLDN15</i>    |
| 3333  | 39,4     | 44,6    | -1,13 | 0,02366 | 0,388 | 205021_s_at  | Forkhead box N3                                                       | <i>FOXP3</i>     |
| 787   | 25,5     | 28,8    | -1,13 | 0,00450 | 0,311 | 1561355_at   | Hypothetical locus LOC692247                                          | <i>LOC692247</i> |
| 5441  | 16,5     | 18,7    | -1,13 | 0,04288 | 0,431 | 206807_s_at  | Adducin 2 (beta)                                                      | <i>ADD2</i>      |
| 1224  | 9,22     | 10,4    | -1,13 | 0,00729 | 0,324 | 211873_s_at  | Protocadherin gamma subfamily A, 9                                    | <i>PCDHGA9</i>   |
| 985   | 26,2     | 29,6    | -1,13 | 0,00569 | 0,315 | 234956_at    | Hypothetical protein LOC93444                                         | <i>LOC93444</i>  |
| 1649  | 4,83     | 5,47    | -1,13 | 0,01037 | 0,344 | 221360_s_at  | Growth hormone secretagogue receptor                                  | <i>GHSR</i>      |
| 38    | 3,48     | 3,93    | -1,13 | 0,00015 | 0,201 | 1561353_at   | cDNA clone IMAGE:4816369                                              | -                |
| 1142  | 17,4     | 19,6    | -1,13 | 0,00669 | 0,320 | 233378_at    | Hypothetical protein LOC731419                                        | <i>LOC731419</i> |
| 1946  | 8,06     | 9,11    | -1,13 | 0,01272 | 0,355 | 228689_at    | NADH-ubiquinone oxidoreductase subunit B14.7                          | <i>NDUFA11</i>   |
| 4565  | 28,0     | 31,7    | -1,13 | 0,03451 | 0,412 | 205331_s_at  | Receptor accessory protein 2                                          | <i>REEP2</i>     |
| 2198  | 5,26     | 5,95    | -1,13 | 0,01453 | 0,361 | 215124_at    | Zinc finger protein 550                                               | <i>ZNF550</i>    |
| 2431  | 5,27     | 5,96    | -1,13 | 0,01625 | 0,365 | 243043_at    | Transcribed locus                                                     | -                |
| 3304  | 5,66     | 6,39    | -1,13 | 0,02351 | 0,388 | 241516_at    | -                                                                     | -                |
| 5564  | 10,9     | 12,3    | -1,13 | 0,04430 | 0,435 | 211263_s_at  | Proprotein convertase subtilisin/kexin type 6                         | <i>PCSK6</i>     |
| 2893  | 5,38     | 6,08    | -1,13 | 0,02031 | 0,383 | 237913_at    | Transcribed locus                                                     | -                |
| 3735  | 3,46     | 3,92    | -1,13 | 0,02712 | 0,397 | 1561430_s_at | Chromosome 3 open reading frame 15                                    | <i>C3orf15</i>   |
| 3262  | 8,92     | 10,1    | -1,13 | 0,02316 | 0,388 | 232787_at    | PPAR-alpha-interacting complex protein 285                            | <i>PRIC285</i>   |
| 2149  | 24,2     | 27,3    | -1,13 | 0,01415 | 0,360 | 1563273_at   | Full length insert cDNA clone ZA89G05                                 | -                |
| 4309  | 24,6     | 27,8    | -1,13 | 0,03208 | 0,407 | 215670_s_at  | SCAN domain containing 2                                              | <i>SCAND2</i>    |
| 4876  | 5,21     | 5,89    | -1,13 | 0,03723 | 0,417 | 234965_at    | Apoptosis related protein APR-4                                       | -                |
| 4071  | 16,3     | 18,4    | -1,13 | 0,02986 | 0,401 | 231255_at    | Myosin phosphatase-Rho interacting protein                            | <i>M-RIP</i>     |
| 1403  | 19,0     | 21,5    | -1,13 | 0,00847 | 0,330 | 206444_at    | Phosphodiesterase 1B, calmodulin-dependent                            | <i>PDE1B</i>     |
| 3429  | 10,8     | 12,2    | -1,13 | 0,02455 | 0,391 | 222515_x_at  | Transmembrane protein 165                                             | <i>TMEM165</i>   |
| 1979  | 7,86     | 8,89    | -1,13 | 0,01292 | 0,355 | 221083_at    | Potassium voltage-gated channel, KQT-like subfamily, member 4         | <i>KCNQ4</i>     |
| 65    | 4,03     | 4,55    | -1,13 | 0,00025 | 0,201 | 1566500_at   | -                                                                     | -                |
| 5802  | 17,6     | 19,9    | -1,13 | 0,04682 | 0,441 | 226469_s_at  | Gamma-glutamyltransferase-like 3                                      | <i>GGTL3</i>     |
| 2301  | 10,1     | 11,4    | -1,13 | 0,01528 | 0,363 | 241849_at    | Transcribed locus                                                     | -                |
| 5414  | 8,16     | 9,22    | -1,13 | 0,04255 | 0,430 | 238887_at    | Clone IMAGE:3901628, mRNA                                             | -                |
| 2319  | 17,8     | 20,1    | -1,13 | 0,01541 | 0,363 | 1553399_a_at | Chromosome 17 open reading frame 69                                   | <i>C17orf69</i>  |
| 502   | 3,31     | 3,74    | -1,13 | 0,00267 | 0,289 | 235906_at    | Transcription initiation factor TFIID 30 kD subunit                   | <i>TAF10</i>     |
| 1514  | 4,44     | 5,01    | -1,13 | 0,00936 | 0,337 | 240540_at    | -                                                                     | -                |
| 283   | 7,67     | 8,66    | -1,13 | 0,00139 | 0,263 | 230801_at    | Chromosome 20 open reading frame 77                                   | <i>C20orf77</i>  |
| 1199  | 11,4     | 12,9    | -1,13 | 0,00708 | 0,323 | 214896_at    | mRNA full length insert cDNA clone EUROIMAGE 29222                    | -                |
| 1738  | 4,53     | 5,12    | -1,13 | 0,01110 | 0,348 | 1558021_at   | RAB9 effector protein with kelch motifs                               | <i>RABEPK</i>    |
| 275   | 6,30     | 7,12    | -1,13 | 0,00132 | 0,262 | 1562689_at   | Hypothetical protein LOC151484                                        | <i>LOC151484</i> |
| 5817  | 14,1     | 15,9    | -1,13 | 0,04701 | 0,442 | 1570295_at   | Clone IMAGE:6059689, mRNA                                             | -                |
| 3612  | 5,72     | 6,46    | -1,13 | 0,02607 | 0,394 | 230924_at    | Tubulin tyrosine ligase-like family, member 6                         | <i>TTL6</i>      |
| 2529  | 10,4     | 11,8    | -1,13 | 0,01708 | 0,369 | 1554219_at   | -                                                                     | -                |
| 5394  | 2100     | 2371    | -1,13 | 0,04230 | 0,429 | 212639_x_at  | Tubulin, alpha 1b                                                     | <i>TUBA1B</i>    |
| 762   | 4,02     | 4,54    | -1,13 | 0,00430 | 0,308 | 220288_at    | Myosin XVA                                                            | <i>MYO15A</i>    |
| 1111  | 17,1     | 19,3    | -1,13 | 0,00650 | 0,319 | 243138_at    | Transcribed locus                                                     | -                |
| 3086  | 7,72     | 8,72    | -1,13 | 0,02176 | 0,385 | 236568_at    | Coiled-coil and C2 domain containing 1B                               | <i>CC2D1B</i>    |
| 1869  | 13,5     | 15,2    | -1,13 | 0,01207 | 0,353 | 233761_at    | cDNA DKFZp762F0616                                                    | -                |
| 4352  | 37,3     | 42,1    | -1,13 | 0,03241 | 0,407 | 223153_x_at  | Transmembrane and ubiquitin-like domain containing 1                  | <i>TMUB1</i>     |
| 2844  | 4,67     | 5,28    | -1,13 | 0,01989 | 0,382 | 233069_at    | Protein phosphatase 4, regulatory subunit 1-like                      | <i>PPP4R1L</i>   |
| 4750  | 9,37     | 10,6    | -1,13 | 0,03600 | 0,414 | 241326_at    | Adenylate kinase 7                                                    | <i>AK7</i>       |
| 1945  | 6,66     | 7,52    | -1,13 | 0,01267 | 0,355 | 240347_at    | Transcribed locus                                                     | -                |
| 373   | 5,12     | 5,78    | -1,13 | 0,00196 | 0,284 | 233188_at    | Polypeptide GalNAc transferase-like protein 4                         | <i>GALNTL4</i>   |
| 3098  | 8,06     | 9,10    | -1,13 | 0,02187 | 0,386 | 230662_at    | Ring finger protein 187                                               | <i>RNF187</i>    |
| 50    | 5984     | 6754    | -1,13 | 0,00020 | 0,201 | 1553570_x_at | Phosphatidylinositol glycan anchor biosynthesis, class F              | <i>PIGF</i>      |

| Index | Mutated* | Normal* | FC    | P value | FDR** | Probe set    | Description                                                   | Gene symbol      |
|-------|----------|---------|-------|---------|-------|--------------|---------------------------------------------------------------|------------------|
| 5974  | 69,4     | 78,3    | -1,13 | 0,04852 | 0,444 | 202556_s_at  | Microspherule protein 1                                       | <i>MCRS1</i>     |
| 562   | 5,03     | 5,67    | -1,13 | 0,00306 | 0,298 | 1564203_at   | Hypothetical protein LOC147004                                | <i>LOC147004</i> |
| 285   | 3,37     | 3,80    | -1,13 | 0,00139 | 0,263 | 1566734_at   | Hypothetical protein LOC283454                                | <i>LOC283454</i> |
| 2009  | 6,88     | 7,77    | -1,13 | 0,01310 | 0,355 | 1560513_at   | Hypothetical LOC400568                                        | <i>LOC400568</i> |
| 4422  | 9,17     | 10,3    | -1,13 | 0,03310 | 0,409 | 232435_at    | Chromosome X open reading frame 45                            | <i>CXorf45</i>   |
| 3343  | 18,7     | 21,1    | -1,13 | 0,02374 | 0,388 | 229445_at    | Cytochrome b-245, alpha polypeptide                           | <i>CYBA</i>      |
| 4521  | 8,93     | 10,1    | -1,13 | 0,03410 | 0,412 | 1570531_at   | cDNA clone IMAGE:4344985                                      | -                |
| 1290  | 32,2     | 36,3    | -1,13 | 0,00769 | 0,325 | 1565611_at   | Dynein, light chain, roadblock-type 1                         | <i>DYNLRB1</i>   |
| 3064  | 35,9     | 40,5    | -1,13 | 0,02160 | 0,385 | 205313_at    | Transcription factor 2, hepatic; LF-B3                        | <i>TCF2</i>      |
| 4634  | 15,1     | 17,1    | -1,13 | 0,03495 | 0,412 | 214311_at    | Zinc finger protein-like 1                                    | <i>ZFPL1</i>     |
| 1151  | 4,75     | 5,36    | -1,13 | 0,00677 | 0,321 | 238273_at    | Solute carrier family 13, member 4                            | <i>SLC13A4</i>   |
| 144   | 23,8     | 26,9    | -1,13 | 0,00065 | 0,244 | 1553136_at   | Potassium channel tetramerisation domain containing 18        | <i>KCTD18</i>    |
| 2312  | 7,86     | 8,86    | -1,13 | 0,01536 | 0,363 | 234914_at    | Zinc finger protein 7                                         | <i>ZNF7</i>      |
| 5889  | 16,1     | 18,1    | -1,13 | 0,04764 | 0,442 | 243261_at    | Hypothetical protein LOC154822                                | <i>LOC154822</i> |
| 5072  | 8,06     | 9,10    | -1,13 | 0,03903 | 0,420 | 230297_x_at  | Synaptic Ras GTPase activating protein 1 homolog (rat)        | <i>SYNGAP1</i>   |
| 5532  | 8,39     | 9,46    | -1,13 | 0,04392 | 0,434 | 208240_s_at  | Fibroblast growth factor 1 (acidic)                           | <i>FGF1</i>      |
| 3026  | 33,0     | 37,2    | -1,13 | 0,02129 | 0,385 | 55583_at     | Dedicator of cytokinesis 6                                    | <i>DOCK6</i>     |
| 5970  | 2563     | 2891    | -1,13 | 0,04848 | 0,444 | 211058_x_at  | Tubulin, alpha 1b                                             | <i>TUBA1B</i>    |
| 1948  | 4,52     | 5,09    | -1,13 | 0,01272 | 0,355 | 236183_at    | Dynein, cytoplasmic 1, heavy chain 1                          | <i>DYNC1H1</i>   |
| 2990  | 5,05     | 5,69    | -1,13 | 0,02102 | 0,384 | 206162_x_at  | Synaptotagmin V                                               | <i>SYT5</i>      |
| 1153  | 16,6     | 18,7    | -1,13 | 0,00678 | 0,321 | 1557723_at   | Hypothetical protein LOC285847                                | <i>LOC285847</i> |
| 4891  | 4,61     | 5,20    | -1,13 | 0,03738 | 0,418 | 223951_at    | Chromosome 21 open reading frame 116                          | <i>C21orf116</i> |
| 4262  | 7,59     | 8,56    | -1,13 | 0,03168 | 0,406 | 210197_at    | Inositol 1,3,4-triphosphate 5/6 kinase                        | <i>ITPK1</i>     |
| 5135  | 6,45     | 7,28    | -1,13 | 0,03950 | 0,421 | 222797_at    | Dihydropyrimidinase-like 5                                    | <i>DPYSL5</i>    |
| 2591  | 64,4     | 72,6    | -1,13 | 0,01758 | 0,371 | 1562022_s_at | RAD9 homolog A (S. pombe)                                     | <i>RAD9A</i>     |
| 906   | 14,0     | 15,7    | -1,13 | 0,00524 | 0,313 | 239838_at    | Zinc finger protein 776                                       | <i>ZNF776</i>    |
| 1688  | 4,28     | 4,83    | -1,13 | 0,01067 | 0,345 | 208514_at    | Potassium voltage-gated channel, Isk-related family, member 1 | <i>KCNE1</i>     |
| 585   | 6,09     | 6,86    | -1,13 | 0,00323 | 0,301 | 230983_at    | Family with sequence similarity 129, member C                 | <i>FAM129C</i>   |
| 2814  | 6,50     | 7,33    | -1,13 | 0,01963 | 0,381 | 213777_s_at  | -                                                             | -                |
| 4605  | 39,6     | 44,6    | -1,13 | 0,03480 | 0,412 | 225360_at    | TraB domain containing                                        | <i>TRABD</i>     |
| 5606  | 1750     | 1973    | -1,13 | 0,04471 | 0,436 | 209251_x_at  | Tubulin, alpha 1c                                             | <i>TUBA1C</i>    |
| 1215  | 4,61     | 5,20    | -1,13 | 0,00722 | 0,324 | 234931_at    | AYP1 pseudogene 1                                             | <i>AYP1p1</i>    |
| 3353  | 7,60     | 8,57    | -1,13 | 0,02382 | 0,388 | 211403_x_at  | Variable charge, Y-linked                                     | <i>VCY</i>       |
| 4403  | 3,81     | 4,30    | -1,13 | 0,03287 | 0,408 | 1552518_s_at | MDM2 (mouse double minute 2)-binding protein, 104kD           | <i>MTBP</i>      |
| 619   | 6,95     | 7,83    | -1,13 | 0,00350 | 0,308 | 1556994_at   | cDNA clone IMAGE:5296604                                      | -                |
| 5835  | 12,6     | 14,2    | -1,13 | 0,04714 | 0,442 | 220207_at    | Hypothetical protein LOC541469                                | <i>LOC541469</i> |
| 5694  | 14,5     | 16,3    | -1,13 | 0,04556 | 0,437 | 210752_s_at  | MAX-like protein X                                            | <i>MLX</i>       |
| 1424  | 3,96     | 4,46    | -1,13 | 0,00863 | 0,331 | 207285_x_at  | Chorionic somatomammotropin hormone-like 1                    | <i>CSHL1</i>     |
| 2350  | 3,89     | 4,38    | -1,13 | 0,01568 | 0,364 | 216569_at    | -                                                             | -                |
| 1432  | 4,82     | 5,43    | -1,13 | 0,00868 | 0,331 | 234553_at    | cDNA FLJ20012 fis, clone ADKA03438                            | -                |
| 4368  | 15,1     | 17,0    | -1,13 | 0,03249 | 0,407 | 230853_at    | Similar to XP_529987.1                                        | -                |
| 4485  | 11,4     | 12,8    | -1,13 | 0,03374 | 0,411 | 229489_at    | Transcribed locus                                             | -                |
| 4235  | 13,3     | 15,0    | -1,13 | 0,03139 | 0,405 | 239821_at    | Hypothetical protein LOC644975                                | <i>FLJ30064</i>  |
| 1030  | 5,61     | 6,32    | -1,13 | 0,00597 | 0,317 | 206760_s_at  | Fc fragment of IgE, low affinity II, receptor for (CD23)      | <i>FCER2</i>     |
| 1365  | 3,91     | 4,40    | -1,13 | 0,00822 | 0,328 | 211108_s_at  | Janus kinase 3 (a protein tyrosine kinase, leukocyte)         | <i>JAK3</i>      |
| 2052  | 9,27     | 10,4    | -1,13 | 0,01334 | 0,355 | 1553248_at   | Coiled-coil domain containing 57                              | <i>CCDC57</i>    |
| 5676  | 107      | 121     | -1,13 | 0,04530 | 0,436 | 201640_x_at  | Cleft lip and palate associated transmembrane protein 1       | <i>CLPTM1</i>    |
| 2208  | 7,47     | 8,41    | -1,13 | 0,01461 | 0,362 | 1553168_at   | Glutamate receptor, ionotropic, kainate 5                     | <i>GRIK5</i>     |
| 1975  | 8,04     | 9,05    | -1,13 | 0,01291 | 0,355 | 220571_at    | PR domain containing 11                                       | <i>PRDM11</i>    |
| 4476  | 4,74     | 5,34    | -1,13 | 0,03365 | 0,411 | 1553478_at   | Proline rich 10                                               | <i>PRR10</i>     |
| 5830  | 10,1     | 11,3    | -1,13 | 0,04712 | 0,442 | 232042_at    | Tweety homolog 2 (Drosophila)                                 | <i>TTYH2</i>     |
| 3282  | 13,4     | 15,0    | -1,13 | 0,02339 | 0,388 | 231922_at    | Zinc finger protein 276                                       | <i>ZNF276</i>    |
| 3068  | 5,71     | 6,43    | -1,13 | 0,02165 | 0,385 | 243719_at    | Serine/threonine kinase 19                                    | <i>STK19</i>     |
| 5257  | 13,3     | 14,9    | -1,13 | 0,04075 | 0,424 | 235375_x_at  | Tetratricopeptide repeat domain 9B                            | <i>TTC9B</i>     |
| 505   | 4,25     | 4,79    | -1,13 | 0,00268 | 0,289 | 206803_at    | Prodynorphin                                                  | <i>PDYN</i>      |
| 1147  | 12,8     | 14,4    | -1,13 | 0,00674 | 0,321 | 1556727_at   | Progressive rod-cone degeneration                             | <i>PRCD</i>      |
| 3870  | 9,54     | 10,7    | -1,13 | 0,02828 | 0,399 | 239074_at    | GRB2-related adaptor protein-like                             | <i>LOC400581</i> |

| Index | Mutated* | Normal* | FC    | P value | FDR** | Probe set    | Description                                                     | Gene symbol |
|-------|----------|---------|-------|---------|-------|--------------|-----------------------------------------------------------------|-------------|
| 1349  | 5,95     | 6,70    | -1,13 | 0,00810 | 0,328 | 234328_at    | -                                                               | -           |
| 5876  | 9,87     | 11,1    | -1,13 | 0,04747 | 0,442 | 237092_at    | Transcribed locus                                               | -           |
| 3210  | 5,16     | 5,81    | -1,13 | 0,02273 | 0,387 | 1555039_a_at | ATP-binding cassette, sub-family C (CFTR/MRP), member 4         | ABCC4       |
| 5032  | 10,9     | 12,2    | -1,13 | 0,03868 | 0,420 | 216789_at    | cDNA FLJ22786 fis, clone KAIA2150                               | -           |
| 2253  | 25,9     | 29,1    | -1,13 | 0,01500 | 0,363 | 232892_at    | Chromosome 20 open reading frame 166                            | C20orf166   |
| 5484  | 408      | 459     | -1,13 | 0,04340 | 0,433 | 200714_x_at  | Amplified in osteosarcoma                                       | OS9         |
| 3014  | 7,56     | 8,51    | -1,13 | 0,02121 | 0,385 | 229474_at    | Flavoprotein oxidoreductase MICAL3                              | MICAL3      |
| 3956  | 5,87     | 6,61    | -1,13 | 0,02889 | 0,399 | 240406_at    | Similar to Ubiquitin specific protease 16 isoform a             | -           |
| 1029  | 10,1     | 11,4    | -1,13 | 0,00596 | 0,317 | 224543_at    | Selectin-like osteoblast-derived protein                        | SVEP1       |
| 657   | 7,81     | 8,79    | -1,13 | 0,00380 | 0,308 | 214233_at    | ADP-ribosylation factor-binding protein GGA2                    | GGA2        |
| 4405  | 87,3     | 98,3    | -1,13 | 0,03288 | 0,408 | 396_f_at     | Erythropoietin receptor                                         | EPOR        |
| 4931  | 4,78     | 5,38    | -1,13 | 0,03782 | 0,419 | 1557720_s_at | Myosin XVI                                                      | MYO16       |
| 1235  | 3,49     | 3,93    | -1,13 | 0,00734 | 0,324 | 203170_at    | KIAA0409 protein                                                | KIAA0409    |
| 4702  | 15,0     | 16,8    | -1,13 | 0,03550 | 0,413 | 1567255_at   | Olfactory receptor, family 10, subfamily D, member 1 pseudogene | OR10D1P     |
| 2293  | 7,98     | 8,98    | -1,13 | 0,01524 | 0,363 | 233143_at    | Chromosome 20 open reading frame 173                            | C20orf173   |
| 2048  | 4,82     | 5,42    | -1,13 | 0,01331 | 0,355 | 211743_s_at  | Proteoglycan 2, bone marrow                                     | PRG2        |
| 757   | 3,91     | 4,40    | -1,13 | 0,00428 | 0,308 | 228715_at    | Zinc finger, CCHC domain containing 12                          | ZCCHC12     |
| 1204  | 5,38     | 6,05    | -1,13 | 0,00713 | 0,324 | 222007_s_at  | FK506 binding protein 8, 38kDa                                  | FKBP8       |
| 5756  | 4,45     | 5,01    | -1,13 | 0,04621 | 0,439 | 220399_at    | Hypothetical protein FLJ22639                                   | FLJ22639    |
| 936   | 11,2     | 12,6    | -1,13 | 0,00536 | 0,313 | 1552602_at   | Calcium channel, voltage-dependent, gamma subunit 5             | CACNG5      |
| 5844  | 2473     | 2783    | -1,13 | 0,04722 | 0,442 | 211072_x_at  | Tubulin, alpha 1b                                               | TUBA1B      |
| 1870  | 4,69     | 5,27    | -1,13 | 0,01208 | 0,353 | 1562830_at   | Methyltransferase 5 domain containing 1                         | METT5D1     |
| 4389  | 8,37     | 9,41    | -1,13 | 0,03270 | 0,407 | 208223_s_at  | Activin A receptor, type IB                                     | ACVR1B      |
| 1735  | 8,94     | 10,1    | -1,13 | 0,01109 | 0,348 | 1560059_at   | Vacuolar protein sorting 37 homolog C (S. cerevisiae)           | VPS37C      |
| 1110  | 7,56     | 8,51    | -1,13 | 0,00650 | 0,319 | 223919_at    | p53-regulated apoptosis-inducing protein 1                      | P53AIP1     |
| 3992  | 10,2     | 11,5    | -1,12 | 0,02919 | 0,400 | 214479_at    | GDNF family receptor alpha 3                                    | GFRA3       |
| 4828  | 11,1     | 12,4    | -1,12 | 0,03676 | 0,416 | 208414_s_at  | Homeobox B3                                                     | HOXB3       |
| 1669  | 114      | 128     | -1,12 | 0,01054 | 0,345 | 218381_s_at  | U2 small nuclear RNA auxiliary factor 2                         | U2AF2       |
| 3506  | 5,13     | 5,78    | -1,12 | 0,02518 | 0,392 | 220871_at    | -                                                               | -           |
| 1496  | 7,15     | 8,05    | -1,12 | 0,00921 | 0,336 | 222374_at    | Beta-transducin repeat containing                               | BTRC        |
| 2979  | 24,7     | 27,7    | -1,12 | 0,02095 | 0,384 | 220989_s_at  | Amnionless homolog (mouse)                                      | AMN         |
| 743   | 30,3     | 34,1    | -1,12 | 0,00422 | 0,308 | 224555_x_at  | Interleukin 1 family, member 7 (zeta)                           | IL1F7       |
| 877   | 4,56     | 5,12    | -1,12 | 0,00506 | 0,313 | 224006_at    | cDNA clone IMAGE:3831123                                        | -           |
| 1079  | 29,1     | 32,7    | -1,12 | 0,00632 | 0,319 | 206437_at    | Endothelial differentiation G-protein coupled receptor 6        | EDG6        |
| 4164  | 7,99     | 8,98    | -1,12 | 0,03077 | 0,404 | 232462_s_at  | BC040926                                                        | FLJ23569    |
| 1697  | 30,2     | 33,9    | -1,12 | 0,01079 | 0,348 | 1570362_at   | cDNA clone IMAGE:5749586                                        | -           |
| 705   | 14,8     | 16,6    | -1,12 | 0,00405 | 0,308 | 1561538_at   | cDNA clone IMAGE:5271875                                        | -           |
| 2994  | 6,56     | 7,38    | -1,12 | 0,02109 | 0,385 | 210182_at    | Cortistatin                                                     | CORT        |
| 3656  | 4,48     | 5,04    | -1,12 | 0,02641 | 0,395 | 241444_at    | Transcribed locus                                               | -           |
| 676   | 8,37     | 9,41    | -1,12 | 0,00387 | 0,308 | 207967_at    | Vacuolar protein sorting 45 homolog (S. cerevisiae)             | VPS45       |
| 1338  | 5,88     | 6,61    | -1,12 | 0,00804 | 0,328 | 1553505_at   | Alpha-2-macroglobulin-like 1                                    | A2ML1       |
| 3667  | 6,19     | 6,96    | -1,12 | 0,02651 | 0,395 | 1570336_at   | 3-hydroxybutyrate dehydrogenase, type 1                         | BDH1        |
| 3235  | 7,97     | 8,96    | -1,12 | 0,02293 | 0,388 | 1557569_at   | Mannose-P-dolichol utilization defect 1                         | MPDU1       |
| 4858  | 8,36     | 9,40    | -1,12 | 0,03707 | 0,417 | 211484_s_at  | Down syndrome cell adhesion molecule                            | DSCAM       |
| 3599  | 4,74     | 5,32    | -1,12 | 0,02596 | 0,394 | 1559926_at   | Hypothetical protein LOC728353                                  | LOC728353   |
| 874   | 8,26     | 9,29    | -1,12 | 0,00505 | 0,313 | 241361_at    | Transcribed locus                                               | -           |
| 4648  | 22,4     | 25,2    | -1,12 | 0,03505 | 0,412 | 214699_x_at  | WD repeat domain, phosphoinositide interacting 2                | WIPI2       |
| 2544  | 9,10     | 10,2    | -1,12 | 0,01720 | 0,369 | 236424_at    | Centrosomal protein 250kDa                                      | CEP250      |
| 2498  | 14,4     | 16,2    | -1,12 | 0,01683 | 0,367 | 231401_s_at  | -                                                               | -           |
| 2896  | 12,8     | 14,3    | -1,12 | 0,02034 | 0,383 | 216143_at    | cDNA DKFZp434L092                                               | -           |
| 2906  | 4,48     | 5,04    | -1,12 | 0,02042 | 0,383 | 234444_at    | cDNA DKFZp434B0735                                              | -           |
| 2341  | 9,93     | 11,2    | -1,12 | 0,01562 | 0,364 | 241540_at    | -                                                               | -           |
| 2275  | 6,19     | 6,95    | -1,12 | 0,01513 | 0,363 | 1561944_at   | cDNA clone IMAGE:5287444                                        | -           |
| 356   | 4,17     | 4,69    | -1,12 | 0,00183 | 0,280 | 207448_at    | Protein O-fucosyltransferase 2                                  | POFUT2      |
| 2831  | 4,54     | 5,10    | -1,12 | 0,01976 | 0,381 | 213371_at    | LIM domain binding 3                                            | LDB3        |
| 5029  | 12,1     | 13,6    | -1,12 | 0,03866 | 0,420 | 243045_at    | SET and MYND domain containing 1                                | SMYD1       |
| 5301  | 31,4     | 35,3    | -1,12 | 0,04138 | 0,426 | 37424_at     | Coiled-coil alpha-helical rod protein 1                         | CCHCR1      |

| Index | Mutated* | Normal* | FC    | P value | FDR** | Probe set    | Description                                              | Gene symbol      |
|-------|----------|---------|-------|---------|-------|--------------|----------------------------------------------------------|------------------|
| 6008  | 13,5     | 15,2    | -1,12 | 0,04883 | 0,444 | 1553162_x_at | Chromosome 19 open reading frame 55                      | <i>C19orf55</i>  |
| 1016  | 5,44     | 6,11    | -1,12 | 0,00588 | 0,316 | 221362_at    | 5-hydroxytryptamine (serotonin) receptor 5A              | <i>HTR5A</i>     |
| 1055  | 10,3     | 11,5    | -1,12 | 0,00618 | 0,319 | 1556586_x_at | cDNA clone IMAGE:5310697                                 | -                |
| 3459  | 20,0     | 22,5    | -1,12 | 0,02478 | 0,392 | 1563632_at   | Hypothetical protein LOC220980                           | <i>LOC220980</i> |
| 3951  | 4,41     | 4,96    | -1,12 | 0,02887 | 0,399 | 233277_at    | Deleted in lymphocytic leukemia, 7                       | <i>DLEU7</i>     |
| 2557  | 6,24     | 7,01    | -1,12 | 0,01731 | 0,370 | 239187_at    | Chromosome 4 open reading frame 30                       | <i>C4orf30</i>   |
| 4081  | 12,4     | 14,0    | -1,12 | 0,02995 | 0,401 | 238266_at    | Transcribed locus                                        | -                |
| 2825  | 7,32     | 8,23    | -1,12 | 0,01972 | 0,381 | 1555196_at   | cDNA clone IMAGE:4825558                                 | -                |
| 5391  | 11,4     | 12,8    | -1,12 | 0,04227 | 0,429 | 231226_at    | Hypothetical protein LOC728142                           | <i>LOC728142</i> |
| 1616  | 4,70     | 5,28    | -1,12 | 0,01013 | 0,343 | 240805_at    | Transcribed locus                                        | -                |
| 3732  | 21,6     | 24,3    | -1,12 | 0,02709 | 0,397 | 221099_at    | -                                                        | -                |
| 2818  | 4,20     | 4,72    | -1,12 | 0,01967 | 0,381 | 240958_at    | Unc-5 homolog C (C. elegans)                             | <i>UNC5C</i>     |
| 2886  | 8,08     | 9,08    | -1,12 | 0,02024 | 0,383 | 228890_at    | Atonal homolog 8 (Drosophila)                            | <i>ATOH8</i>     |
| 1423  | 6,13     | 6,89    | -1,12 | 0,00863 | 0,331 | 1559948_at   | cDNA FLJ20447 fis, clone KAT05276                        | -                |
| 4660  | 23,1     | 25,9    | -1,12 | 0,03518 | 0,413 | 231228_at    | BCL2-like 1                                              | <i>BCL2L1</i>    |
| 5686  | 3,91     | 4,39    | -1,12 | 0,04539 | 0,436 | 206930_at    | Glycine-N-acyltransferase                                | <i>GLYAT</i>     |
| 5083  | 114      | 128     | -1,12 | 0,03913 | 0,420 | 202495_at    | Tubulin folding cofactor C                               | <i>TBCC</i>      |
| 4285  | 20,1     | 22,6    | -1,12 | 0,03184 | 0,406 | 240508_at    | -                                                        | -                |
| 1749  | 5,50     | 6,18    | -1,12 | 0,01117 | 0,348 | 222345_at    | Transcribed locus                                        | -                |
| 1481  | 5,40     | 6,06    | -1,12 | 0,00909 | 0,335 | 232241_at    | -                                                        | -                |
| 3449  | 18,4     | 20,7    | -1,12 | 0,02469 | 0,391 | 234214_at    | cDNA FLJ39333 fis, clone OCBBF2017306                    | -                |
| 2524  | 7,84     | 8,80    | -1,12 | 0,01704 | 0,369 | 214546_s_at  | Purinergic receptor P2Y, G-protein coupled, 11           | <i>P2RY11</i>    |
| 4763  | 7,50     | 8,42    | -1,12 | 0,03610 | 0,414 | 207742_s_at  | Nuclear receptor subfamily 6, group A, member 1          | <i>NR6A1</i>     |
| 1448  | 15,6     | 17,5    | -1,12 | 0,00881 | 0,333 | 1569361_a_at | Similar to Serine/arginine repetitive matrix 1           | -                |
| 485   | 3,67     | 4,12    | -1,12 | 0,00259 | 0,289 | 244001_at    | Nucleosome assembly protein 1-like 4                     | <i>NAP1L4</i>    |
| 5633  | 10,2     | 11,4    | -1,12 | 0,04497 | 0,436 | 242497_at    | TRAF-type zinc finger domain containing 1                | <i>TRAFD1</i>    |
| 5074  | 11,4     | 12,8    | -1,12 | 0,03904 | 0,420 | 242684_at    | Zinc finger protein 425                                  | <i>ZNF425</i>    |
| 5079  | 13,7     | 15,3    | -1,12 | 0,03907 | 0,420 | 210431_at    | Alkaline phosphatase, placental-like 2                   | <i>ALPPL2</i>    |
| 6016  | 5,61     | 6,30    | -1,12 | 0,04896 | 0,445 | 210015_s_at  | Microtubule-associated protein 2                         | <i>MAP2</i>      |
| 3101  | 7,89     | 8,86    | -1,12 | 0,02190 | 0,386 | 206610_s_at  | Coagulation factor XI (plasma thromboplastin antecedent) | <i>F11</i>       |
| 314   | 3,82     | 4,29    | -1,12 | 0,00159 | 0,272 | 231515_at    | Transcribed locus                                        | -                |
| 687   | 5,56     | 6,24    | -1,12 | 0,00393 | 0,308 | 239584_at    | cDNA FLJ35805 fis, clone TESTI2005982                    | -                |
| 738   | 3,88     | 4,36    | -1,12 | 0,00420 | 0,308 | 243230_at    | -                                                        | -                |
| 1335  | 8,30     | 9,32    | -1,12 | 0,00802 | 0,328 | 1560068_a_at | Clone IMAGE:5762932, mRNA                                | -                |
| 3980  | 7,82     | 8,78    | -1,12 | 0,02910 | 0,400 | 232243_at    | Microcephaly, primary autosomal recessive 1              | <i>MCPH1</i>     |
| 2368  | 9,16     | 10,3    | -1,12 | 0,01580 | 0,364 | 230796_at    | Hypothetical LOC440900                                   | <i>LOC440900</i> |
| 5712  | 7,44     | 8,34    | -1,12 | 0,04574 | 0,438 | 234024_at    | Cerebellin 4 precursor                                   | <i>CBLN4</i>     |
| 2637  | 27,2     | 30,5    | -1,12 | 0,01798 | 0,373 | 224923_at    | Tetratricopeptide repeat domain 7A                       | <i>TTC7A</i>     |
| 1263  | 31,6     | 35,5    | -1,12 | 0,00752 | 0,325 | 219333_s_at  | Calpain 10                                               | <i>CAPN10</i>    |
| 1180  | 4,72     | 5,30    | -1,12 | 0,00693 | 0,321 | 240976_at    | Transcribed locus                                        | -                |
| 4942  | 5,48     | 6,15    | -1,12 | 0,03793 | 0,419 | 234439_at    | cDNA FLJ10235 fis, clone HEMBB1000339                    | -                |
| 838   | 4,22     | 4,73    | -1,12 | 0,00480 | 0,313 | 214863_at    | Full length insert cDNA clone ZC35F11                    | -                |
| 3935  | 4,27     | 4,79    | -1,12 | 0,02875 | 0,399 | 238365_s_at  | Hypothetical LOC339541                                   | <i>MGC33556</i>  |
| 3338  | 6,18     | 6,94    | -1,12 | 0,02369 | 0,388 | 217603_at    | ATPase, H+ transporting, lysosomal V0 subunit a2         | <i>ATP6V0A2</i>  |
| 1126  | 3,72     | 4,17    | -1,12 | 0,00657 | 0,319 | 1564539_at   | Hypothetical protein LOC647323                           | <i>LOC647323</i> |
| 2504  | 5,16     | 5,79    | -1,12 | 0,01685 | 0,367 | 237679_at    | Tripartite motif-containing 66                           | <i>TRIM66</i>    |
| 698   | 3,46     | 3,88    | -1,12 | 0,00401 | 0,308 | 243972_at    | Transcribed locus                                        | -                |
| 3208  | 8,16     | 9,15    | -1,12 | 0,02272 | 0,387 | 229102_at    | HIV-1 Tat interactive protein 2, 30kDa                   | <i>HTATIP2</i>   |
| 5561  | 6,42     | 7,20    | -1,12 | 0,04429 | 0,435 | 220634_at    | T-box 4                                                  | <i>TBX4</i>      |
| 2746  | 5,64     | 6,32    | -1,12 | 0,01899 | 0,378 | 208376_at    | Chemokine (C-C motif) receptor 4                         | <i>CCR4</i>      |
| 4841  | 10,2     | 11,5    | -1,12 | 0,03690 | 0,417 | 233983_at    | Transglutaminase 6                                       | <i>TGM6</i>      |
| 2366  | 12,4     | 13,9    | -1,12 | 0,01579 | 0,364 | 243576_at    | -                                                        | -                |
| 1598  | 4,10     | 4,60    | -1,12 | 0,00997 | 0,341 | 238308_at    | Transcribed locus                                        | -                |
| 576   | 3,77     | 4,23    | -1,12 | 0,00316 | 0,300 | 207592_s_at  | Brain cyclic nucleotide gated channel 2                  | <i>HCN2</i>      |
| 2130  | 5,37     | 6,03    | -1,12 | 0,01401 | 0,359 | 237098_at    | Chromosome 1 open reading frame 21                       | <i>C1orf21</i>   |
| 6090  | 12,8     | 14,3    | -1,12 | 0,04972 | 0,446 | 1568719_s_at | Chromosome 6 open reading frame 85                       | <i>C6orf85</i>   |
| 3642  | 5,18     | 5,81    | -1,12 | 0,02633 | 0,395 | 1553809_a_at | Chromosome 9 open reading frame 71                       | <i>C9orf71</i>   |

| Index | Mutated* | Normal* | FC    | P value | FDR** | Probe set    | Description                                                                    | Gene symbol      |
|-------|----------|---------|-------|---------|-------|--------------|--------------------------------------------------------------------------------|------------------|
| 4992  | 7,36     | 8,25    | -1,12 | 0,03831 | 0,419 | 233909_at    | cDNA DKFZp564C0962                                                             | -                |
| 5994  | 4,31     | 4,84    | -1,12 | 0,04874 | 0,444 | 207514_s_at  | Guanine nucleotide binding protein (G protein), alpha transducing activity pol | <i>GNAT1</i>     |
| 3756  | 9,41     | 10,6    | -1,12 | 0,02730 | 0,397 | 1569419_at   | Clone IMAGE:4994945, mRNA                                                      | -                |
| 1237  | 6,87     | 7,70    | -1,12 | 0,00736 | 0,324 | 240227_at    | Mesoderm induction early response 1 homolog (Xenopus laevis)                   | <i>MIER1</i>     |
| 1487  | 7,26     | 8,15    | -1,12 | 0,00916 | 0,336 | 221368_at    | Sialidase 2 (cytosolic sialidase)                                              | <i>NEU2</i>      |
| 58    | 3,08     | 3,45    | -1,12 | 0,00022 | 0,201 | 1562699_at   | Neural cell adhesion molecule 1                                                | <i>NCAM1</i>     |
| 2058  | 5,69     | 6,38    | -1,12 | 0,01343 | 0,356 | 1559867_at   | cDNA FLJ32420 fis, clone SKMUS2000898                                          | -                |
| 5080  | 9,01     | 10,1    | -1,12 | 0,03908 | 0,420 | 1559522_at   | cDNA FLJ40173 fis, clone TESTI2016922                                          | -                |
| 2095  | 4,19     | 4,70    | -1,12 | 0,01373 | 0,358 | 239126_at    | Chromosome 19 open reading frame 23                                            | <i>C19orf23</i>  |
| 381   | 4,15     | 4,65    | -1,12 | 0,00199 | 0,284 | 207617_at    | DEAD (Asp-Glu-Ala-Asp) box polypeptide 3, X-linked                             | <i>DDX3X</i>     |
| 4429  | 22,0     | 24,7    | -1,12 | 0,03316 | 0,409 | 1566207_at   | Transcription elongation factor A (SII), 1                                     | <i>TCEA1</i>     |
| 4937  | 5,15     | 5,78    | -1,12 | 0,03789 | 0,419 | 240672_at    | -                                                                              | -                |
| 4144  | 6,39     | 7,16    | -1,12 | 0,03057 | 0,403 | 1561273_at   | -                                                                              | -                |
| 5366  | 12,0     | 13,5    | -1,12 | 0,04212 | 0,429 | 241568_at    | Transcribed locus                                                              | -                |
| 6116  | 11,3     | 12,7    | -1,12 | 0,04993 | 0,446 | 216760_at    | HRAS-like suppressor 2                                                         | <i>HRASLS2</i>   |
| 3113  | 5,11     | 5,73    | -1,12 | 0,02199 | 0,386 | 1560589_a_at | Clone IMAGE:4657243, mRNA                                                      | -                |
| 4645  | 12,2     | 13,7    | -1,12 | 0,03505 | 0,412 | 243435_at    | KCNQ1 overlapping transcript 1                                                 | <i>KCNQ1OT1</i>  |
| 1770  | 7,40     | 8,29    | -1,12 | 0,01129 | 0,348 | 213240_s_at  | Keratin 4                                                                      | <i>KRT4</i>      |
| 4838  | 8,41     | 9,42    | -1,12 | 0,03689 | 0,417 | 228984_at    | KIAA1394 protein                                                               | <i>KIAA1394</i>  |
| 4246  | 7,08     | 7,94    | -1,12 | 0,03151 | 0,406 | 233445_at    | Transcribed locus                                                              | -                |
| 5278  | 17,6     | 19,8    | -1,12 | 0,04104 | 0,425 | 224203_at    | Suppressor of fused homolog (Drosophila)                                       | <i>SUFU</i>      |
| 1170  | 9,75     | 10,9    | -1,12 | 0,00688 | 0,321 | 208354_s_at  | Solute carrier family 12, member 3                                             | <i>SLC12A3</i>   |
| 2010  | 7,62     | 8,54    | -1,12 | 0,01311 | 0,355 | 236008_at    | Chromosome 9 open reading frame 73                                             | <i>C9orf73</i>   |
| 2838  | 9,44     | 10,6    | -1,12 | 0,01981 | 0,382 | 211410_x_at  | Killer cell immunoglobulin-like receptor 2DL5A                                 | <i>KIR2DL5A</i>  |
| 5992  | 11,3     | 12,6    | -1,12 | 0,04873 | 0,444 | 237507_at    | Keratin 73                                                                     | <i>KRT73</i>     |
| 2074  | 9,60     | 10,8    | -1,12 | 0,01356 | 0,356 | 235495_at    | Coiled-coil domain containing 97                                               | <i>CCDC97</i>    |
| 5462  | 44,6     | 50,0    | -1,12 | 0,04314 | 0,432 | 232581_x_at  | Human immunodeficiency virus type I enhancer binding protein 3                 | <i>HIVEP3</i>    |
| 1661  | 3,45     | 3,86    | -1,12 | 0,01049 | 0,345 | 1565838_at   | cDNA FLJ35990 fis, clone TESTI2014415                                          | -                |
| 2561  | 6,77     | 7,58    | -1,12 | 0,01737 | 0,371 | 1553802_a_at | SRY (sex determining region Y)-box 3                                           | <i>SOX3</i>      |
| 1589  | 7,64     | 8,56    | -1,12 | 0,00988 | 0,340 | 237730_at    | cDNA clone IMAGE:5269981                                                       | -                |
| 1411  | 7,97     | 8,93    | -1,12 | 0,00852 | 0,330 | 206008_at    | Transglutaminase 1                                                             | <i>TGM1</i>      |
| 4080  | 4,67     | 5,23    | -1,12 | 0,02994 | 0,401 | 214498_at    | Agouti signaling protein, nonagouti homolog (mouse)                            | <i>ASIP</i>      |
| 3748  | 6,16     | 6,90    | -1,12 | 0,02725 | 0,397 | 240917_at    | -                                                                              | -                |
| 1547  | 4,33     | 4,86    | -1,12 | 0,00955 | 0,337 | 1566680_at   | cDNA FLJ37017 fis, clone BRACE2010642                                          | -                |
| 1862  | 10,4     | 11,7    | -1,12 | 0,01202 | 0,353 | 219748_at    | Triggering receptor expressed on myeloid cells-like 2                          | <i>TREML2</i>    |
| 3822  | 12,7     | 14,2    | -1,12 | 0,02789 | 0,399 | 1555650_at   | Kelch-like 17 (Drosophila)                                                     | <i>KLHL17</i>    |
| 3689  | 6,09     | 6,82    | -1,12 | 0,02665 | 0,395 | 224457_at    | Hypothetical protein MGC12982                                                  | <i>MGC12982</i>  |
| 3205  | 6,93     | 7,76    | -1,12 | 0,02269 | 0,387 | 209937_at    | Transmembrane 4 L six family member 4                                          | <i>TM4SF4</i>    |
| 3376  | 6,37     | 7,14    | -1,12 | 0,02404 | 0,389 | 1568248_x_at | Small nucleolar RNA, H/ACA box 71B                                             | <i>SNORA71B</i>  |
| 3195  | 4,62     | 5,17    | -1,12 | 0,02264 | 0,387 | 1556505_at   | cDNA clone IMAGE:4826545                                                       | -                |
| 2500  | 6,24     | 6,99    | -1,12 | 0,01684 | 0,367 | 215340_at    | Adenylate cyclase 1 (brain)                                                    | <i>ADCY1</i>     |
| 2354  | 38,8     | 43,4    | -1,12 | 0,01571 | 0,364 | 219640_at    | Claudin 15                                                                     | <i>CLDN15</i>    |
| 5863  | 10,6     | 11,9    | -1,12 | 0,04741 | 0,442 | 1558174_at   | Family with sequence similarity 43, member A                                   | <i>FAM43A</i>    |
| 5127  | 5,09     | 5,70    | -1,12 | 0,03946 | 0,421 | 1556879_at   | cDNA FLJ39461 fis, clone PROST2011660                                          | -                |
| 3377  | 11,7     | 13,1    | -1,12 | 0,02404 | 0,389 | 230887_at    | CDC14 cell division cycle 14 homolog B (S. cerevisiae)                         | <i>CDC14B</i>    |
| 1165  | 8,54     | 9,56    | -1,12 | 0,00685 | 0,321 | 231006_at    | Spermatogenesis associated 8                                                   | <i>SPATA8</i>    |
| 729   | 7,41     | 8,30    | -1,12 | 0,00417 | 0,308 | 221165_s_at  | Interleukin 22                                                                 | <i>IL22</i>      |
| 1596  | 15,0     | 16,8    | -1,12 | 0,00995 | 0,341 | 234882_at    | -                                                                              | -                |
| 978   | 5,91     | 6,62    | -1,12 | 0,00567 | 0,315 | 244309_at    | Transcribed locus                                                              | -                |
| 5529  | 4,13     | 4,62    | -1,12 | 0,04387 | 0,434 | 244879_at    | -                                                                              | -                |
| 6084  | 19,3     | 21,6    | -1,12 | 0,04967 | 0,446 | 217159_x_at  | Sialic acid binding Ig-like lectin 7                                           | <i>SIGLEC7</i>   |
| 3712  | 5,02     | 5,62    | -1,12 | 0,02691 | 0,396 | 220534_at    | Tripartite motif-containing 48                                                 | <i>TRIM48</i>    |
| 2445  | 7,33     | 8,21    | -1,12 | 0,01635 | 0,366 | 234246_at    | -                                                                              | -                |
| 2617  | 7,37     | 8,25    | -1,12 | 0,01778 | 0,371 | 233395_at    | cDNA FLJ12353 fis, clone MAMMA1002322                                          | -                |
| 1729  | 11,4     | 12,7    | -1,12 | 0,01105 | 0,348 | 1569212_at   | Scavenger receptor protein family member                                       | <i>LOC619207</i> |
| 1849  | 4,46     | 4,99    | -1,12 | 0,01190 | 0,352 | 207251_at    | Meprin A, beta                                                                 | <i>MEP1B</i>     |
| 1866  | 14,5     | 16,3    | -1,12 | 0,01205 | 0,353 | 213337_s_at  | Suppressor of cytokine signaling 1                                             | <i>SOCS1</i>     |

| Index | Mutated* | Normal* | FC    | P value | FDR** | Probe set    | Description                                                                   | Gene symbol      |
|-------|----------|---------|-------|---------|-------|--------------|-------------------------------------------------------------------------------|------------------|
| 1458  | 39,6     | 44,4    | -1,12 | 0,00891 | 0,334 | 1553361_x_at | F-box and leucine-rich repeat protein 18                                      | <i>FBXL18</i>    |
| 2596  | 6,03     | 6,75    | -1,12 | 0,01765 | 0,371 | 240760_at    | CMT1A duplicated region transcript 15                                         | <i>CDRT15</i>    |
| 506   | 9,60     | 10,8    | -1,12 | 0,00269 | 0,289 | 239608_at    | 1-acylglycerol-3-phosphate O-acyltransferase 7 (lysophosphatidic acid acyltra | <i>AGPAT7</i>    |
| 5898  | 6,02     | 6,73    | -1,12 | 0,04775 | 0,443 | 242554_at    | Two pore segment channel 2                                                    | <i>TPCN2</i>     |
| 1838  | 78,3     | 87,7    | -1,12 | 0,01183 | 0,351 | 202513_s_at  | Protein phosphatase 2, regulatory subunit B', delta isoform                   | <i>PPP2R5D</i>   |
| 3529  | 10,8     | 12,1    | -1,12 | 0,02536 | 0,393 | 206064_s_at  | Peptidylprolyl isomerase (cyclophilin)-like 2                                 | <i>PPIL2</i>     |
| 3403  | 6,41     | 7,17    | -1,12 | 0,02428 | 0,390 | 237757_at    | Transcribed locus                                                             | -                |
| 4736  | 6,94     | 7,76    | -1,12 | 0,03585 | 0,414 | 227885_at    | Hypothetical LOC400236                                                        | <i>LOC400236</i> |
| 3053  | 4,03     | 4,51    | -1,12 | 0,02148 | 0,385 | 235809_at    | Lin-54 homolog (C. elegans)                                                   | <i>LIN54</i>     |
| 3863  | 4,26     | 4,77    | -1,12 | 0,02822 | 0,399 | 1559222_at   | cDNA FLJ30725 fis, clone FCBBF4000415                                         | -                |
| 5233  | 3,63     | 4,07    | -1,12 | 0,04049 | 0,423 | 244459_at    | Transcribed locus                                                             | -                |
| 3986  | 10,1     | 11,4    | -1,12 | 0,02914 | 0,400 | 241276_at    | -                                                                             | -                |
| 2068  | 3,69     | 4,13    | -1,12 | 0,01352 | 0,356 | 215746_at    | (clone B3B3E13) chromosome 4p16.3 DNA fragment                                | -                |
| 1758  | 11,8     | 13,2    | -1,12 | 0,01121 | 0,348 | 208539_x_at  | Small proline-rich protein 2B                                                 | <i>SPRR2B</i>    |
| 4859  | 6,70     | 7,50    | -1,12 | 0,03707 | 0,417 | 217471_at    | cDNA DKFZp586B1324                                                            | -                |
| 4925  | 9,76     | 10,9    | -1,12 | 0,03777 | 0,419 | 230268_at    | Transcribed locus                                                             | -                |
| 3028  | 5,74     | 6,42    | -1,12 | 0,02131 | 0,385 | 239323_at    | cDNA clone IMAGE:5302680                                                      | -                |
| 5110  | 14,5     | 16,2    | -1,12 | 0,03931 | 0,421 | 242933_at    | Transcribed locus                                                             | -                |
| 3578  | 11,4     | 12,8    | -1,12 | 0,02583 | 0,394 | 229972_at    | Transcribed locus                                                             | -                |
| 1574  | 4,88     | 5,47    | -1,12 | 0,00978 | 0,340 | 1561557_at   | Lipase A, lysosomal acid, cholesterol esterase                                | <i>LIPA</i>      |
| 3437  | 6,91     | 7,73    | -1,12 | 0,02460 | 0,391 | 243881_at    | cDNA FLJ45325 fis, clone BRHIP3006717                                         | -                |
| 5454  | 37,1     | 41,5    | -1,12 | 0,04304 | 0,432 | 238594_x_at  | Dual specificity phosphatase 8                                                | <i>DUSP8</i>     |
| 1494  | 5,63     | 6,29    | -1,12 | 0,00920 | 0,336 | 228085_at    | cDNA clone IMAGE:4818335                                                      | -                |
| 1160  | 6,58     | 7,36    | -1,12 | 0,00682 | 0,321 | 236190_at    | Xylosyltransferase I                                                          | <i>XYLT1</i>     |
| 6042  | 10,3     | 11,5    | -1,12 | 0,04921 | 0,445 | 216911_s_at  | Hypermethylated in cancer 2                                                   | <i>HIC2</i>      |
| 4874  | 7,27     | 8,13    | -1,12 | 0,03722 | 0,417 | 216597_at    | Similar to Cationic trypsin III precursor (Pretrypsinogen III)                | <i>LOC642150</i> |
| 2995  | 14,0     | 15,7    | -1,12 | 0,02110 | 0,385 | 1563485_at   | cDNA DKFZp451D039                                                             | -                |
| 2598  | 4,76     | 5,33    | -1,12 | 0,01765 | 0,371 | 231625_at    | Solute carrier family 22, member 9                                            | <i>SLC22A9</i>   |
| 403   | 3,67     | 4,11    | -1,12 | 0,00212 | 0,286 | 244465_at    | Hypothetical protein LOC283033                                                | <i>LOC283033</i> |
| 1060  | 7,32     | 8,19    | -1,12 | 0,00621 | 0,319 | 1558230_at   | Splicing factor 3b, subunit 2, 145kDa                                         | <i>SF3B2</i>     |
| 737   | 5,02     | 5,62    | -1,12 | 0,00420 | 0,308 | 1555834_at   | Ubiquitin carboxyl-terminal esterase L1                                       | <i>UCHL1</i>     |
| 5832  | 29,5     | 33,0    | -1,12 | 0,04713 | 0,442 | 223663_at    | Coiled-coil domain containing 88B                                             | <i>CCDC88B</i>   |
| 3329  | 80,3     | 89,8    | -1,12 | 0,02364 | 0,388 | 212431_at    | KIAA0194 protein                                                              | <i>KIAA0194</i>  |
| 5089  | 5,95     | 6,66    | -1,12 | 0,03917 | 0,420 | 1562045_at   | cDNA FLJ34133 fis, clone FCBBF3010601                                         | -                |
| 5133  | 12,3     | 13,8    | -1,12 | 0,03950 | 0,421 | 233696_at    | cDNA FLJ21357 fis, clone COL02835                                             | -                |
| 3850  | 13,2     | 14,7    | -1,12 | 0,02810 | 0,399 | 239707_at    | Solute carrier family 5, member 10                                            | <i>SLC5A10</i>   |
| 277   | 4,26     | 4,76    | -1,12 | 0,00135 | 0,263 | 216622_at    | Laminin, beta 4                                                               | <i>LAMB4</i>     |
| 6014  | 4,75     | 5,31    | -1,12 | 0,04891 | 0,445 | 1562719_at   | cDNA clone IMAGE:5297905                                                      | -                |
| 5404  | 58,7     | 65,7    | -1,12 | 0,04241 | 0,429 | 212156_at    | Vacuolar protein sorting 39 homolog (S. cerevisiae)                           | <i>VPS39</i>     |
| 2160  | 7,57     | 8,46    | -1,12 | 0,01424 | 0,360 | 229929_at    | SplA/ryanodine receptor domain and SOCS box containing 4                      | <i>SPSB4</i>     |
| 651   | 8,92     | 9,97    | -1,12 | 0,00370 | 0,308 | 1563405_at   | ATPase, H+/K+ exchanging, beta polypeptide                                    | <i>ATP4B</i>     |
| 3002  | 3,77     | 4,21    | -1,12 | 0,02113 | 0,385 | 1558601_at   | Hypothetical protein LOC285194                                                | <i>LOC285194</i> |
| 3281  | 5,70     | 6,37    | -1,12 | 0,02337 | 0,388 | 205124_at    | Myocyte enhancer factor 2B                                                    | <i>MEF2B</i>     |
| 4417  | 4,92     | 5,50    | -1,12 | 0,03305 | 0,409 | 206017_at    | KIAA0319 protein                                                              | <i>KIAA0319</i>  |
| 1664  | 12,0     | 13,4    | -1,12 | 0,01051 | 0,345 | 233782_at    | WD repeat domain 68                                                           | <i>WDR68</i>     |
| 3308  | 14,2     | 15,9    | -1,12 | 0,02353 | 0,388 | 241054_at    | Transcribed locus                                                             | -                |
| 4734  | 5,61     | 6,27    | -1,12 | 0,03583 | 0,414 | 1570541_s_at | Similar to Guanylate binding protein 3                                        | <i>LOC729936</i> |
| 4752  | 87,0     | 97,2    | -1,12 | 0,03600 | 0,414 | 1569105_at   | SET domain containing 5                                                       | <i>SETD5</i>     |
| 4295  | 17,7     | 19,8    | -1,12 | 0,03193 | 0,406 | 210200_at    | WW domain containing E3 ubiquitin protein ligase 2                            | <i>WWP2</i>      |
| 1553  | 3,55     | 3,97    | -1,12 | 0,00958 | 0,337 | 216901_s_at  | IKAROS family zinc finger 1 (Ikaros)                                          | <i>IKZF1</i>     |
| 1076  | 7,31     | 8,17    | -1,12 | 0,00632 | 0,319 | 1564319_at   | Chromosome 19 open reading frame 16                                           | <i>C19orf16</i>  |
| 5455  | 5,13     | 5,73    | -1,12 | 0,04305 | 0,432 | 219139_s_at  | KIAA1922 protein                                                              | <i>KIAA1922</i>  |
| 1707  | 7,02     | 7,85    | -1,12 | 0,01091 | 0,348 | 211364_at    | Methylthioadenosine phosphorylase                                             | <i>MTAP</i>      |
| 6104  | 6,90     | 7,71    | -1,12 | 0,04983 | 0,446 | 220902_at    | Hypothetical LOC196707                                                        | <i>FLJ12616</i>  |
| 2669  | 21,5     | 24,1    | -1,12 | 0,01825 | 0,374 | 229507_at    | Chromosome 3 open reading frame 54                                            | <i>C3orf54</i>   |
| 4177  | 6,91     | 7,72    | -1,12 | 0,03088 | 0,404 | 236709_at    | Similar to XP_529699.1                                                        | -                |
| 3703  | 12,1     | 13,5    | -1,12 | 0,02678 | 0,395 | 220320_at    | Docking protein 3                                                             | <i>DOK3</i>      |

| Index | Mutated* | Normal* | FC    | P value | FDR** | Probe set    | Description                                                                  | Gene symbol |
|-------|----------|---------|-------|---------|-------|--------------|------------------------------------------------------------------------------|-------------|
| 1133  | 5,10     | 5,70    | -1,12 | 0,00662 | 0,319 | 217242_at    | Zinc finger protein 154                                                      | ZNF154      |
| 2545  | 12,6     | 14,1    | -1,12 | 0,01720 | 0,369 | 239676_x_at  | Hypothetical protein LOC642031                                               | LOC642031   |
| 3266  | 14,4     | 16,1    | -1,12 | 0,02321 | 0,388 | 1559204_x_at | v-KI-Ras2 Kirsten rat sarcoma viral oncogene homolog                         | KRAS        |
| 4243  | 11,1     | 12,4    | -1,12 | 0,03148 | 0,406 | 230107_at    | Transcribed locus                                                            | -           |
| 3442  | 16,3     | 18,2    | -1,12 | 0,02463 | 0,391 | 239256_at    | Transcribed locus                                                            | -           |
| 949   | 5,74     | 6,41    | -1,12 | 0,00544 | 0,313 | 1559257_a_at | Membrane associated guanylate kinase inverted-1                              | MAGI1       |
| 1123  | 6,11     | 6,83    | -1,12 | 0,00655 | 0,319 | 231621_at    | Transcribed locus                                                            | -           |
| 4129  | 8,85     | 9,88    | -1,12 | 0,03040 | 0,402 | 208888_s_at  | Nuclear receptor co-repressor 2                                              | NCOR2       |
| 3466  | 4,74     | 5,30    | -1,12 | 0,02484 | 0,392 | 230749_s_at  | Calcium/calmodulin-dependent protein kinase II delta                         | CAMK2D      |
| 5649  | 11,7     | 13,0    | -1,12 | 0,04507 | 0,436 | 223884_at    | Opticin                                                                      | OPTC        |
| 3359  | 12,2     | 13,6    | -1,12 | 0,02384 | 0,388 | 239396_at    | cDNA clone IMAGE:4150640                                                     | -           |
| 2247  | 23,1     | 25,8    | -1,12 | 0,01493 | 0,363 | 226737_at    | Solute carrier family 25, member 42                                          | SLC25A42    |
| 570   | 6,17     | 6,89    | -1,12 | 0,00312 | 0,300 | 1560631_at   | Calcium binding and coiled-coil domain 2                                     | CALCOCO2    |
| 4572  | 6,02     | 6,72    | -1,12 | 0,03457 | 0,412 | 206223_at    | Lemur tyrosine kinase 2                                                      | LMTK2       |
| 2076  | 8,84     | 9,87    | -1,12 | 0,01357 | 0,356 | 214064_at    | Transferrin                                                                  | TF          |
| 1395  | 5,17     | 5,77    | -1,12 | 0,00843 | 0,330 | 1553673_at   | Serine/threonine kinase 35                                                   | STK35       |
| 5520  | 16,2     | 18,0    | -1,12 | 0,04379 | 0,433 | 221350_at    | Homeobox C8                                                                  | HOXC8       |
| 3526  | 22,7     | 25,3    | -1,12 | 0,02532 | 0,393 | 225015_s_at  | Serine/threonine kinase 40                                                   | STK40       |
| 4006  | 10,8     | 12,0    | -1,12 | 0,02932 | 0,400 | 240623_at    | Transcribed locus                                                            | -           |
| 4155  | 5,89     | 6,57    | -1,12 | 0,03065 | 0,403 | 236865_at    | Transcribed locus                                                            | -           |
| 1041  | 3,39     | 3,79    | -1,12 | 0,00605 | 0,318 | 1563277_at   | Full length insert cDNA YQ02E12                                              | -           |
| 504   | 3,18     | 3,55    | -1,12 | 0,00268 | 0,289 | 1561288_at   | cDNA clone IMAGE:4838258                                                     | -           |
| 989   | 5,09     | 5,68    | -1,12 | 0,00570 | 0,315 | 236786_at    | Family with sequence similarity 135, member B                                | FAM135B     |
| 4132  | 3,51     | 3,92    | -1,12 | 0,03041 | 0,402 | 242779_at    | Transcribed locus                                                            | -           |
| 2466  | 17,4     | 19,5    | -1,12 | 0,01657 | 0,367 | 216537_s_at  | Sialic acid binding Ig-like lectin 7                                         | SIGLEC7     |
| 1681  | 6,65     | 7,42    | -1,12 | 0,01061 | 0,345 | 240809_at    | Chromosome 21 open reading frame 121                                         | C21orf121   |
| 5612  | 8,59     | 9,58    | -1,12 | 0,04477 | 0,436 | 234287_at    | mRNA partial cDNA sequence from cDNA selection, DCR1-8.0                     | -           |
| 3636  | 7,16     | 7,99    | -1,12 | 0,02629 | 0,395 | 241454_at    | Transcribed locus                                                            | -           |
| 512   | 45,5     | 50,7    | -1,12 | 0,00273 | 0,291 | 33768_at     | Dystrophin myotonia, WD repeat containing                                    | DMWD        |
| 1161  | 11,5     | 12,8    | -1,12 | 0,00683 | 0,321 | 217365_at    | Similar to PRAME family member 6                                             | LOC729343   |
| 5387  | 9,21     | 10,3    | -1,12 | 0,04224 | 0,429 | 232764_at    | Cyclin B2                                                                    | CCNB2       |
| 1271  | 7,61     | 8,49    | -1,12 | 0,00755 | 0,325 | 207940_x_at  | Cannabinoid receptor 1 (brain)                                               | CNR1        |
| 3701  | 5,94     | 6,63    | -1,12 | 0,02677 | 0,395 | 215194_at    | Protein kinase C, alpha                                                      | PRKCA       |
| 5427  | 9,47     | 10,6    | -1,12 | 0,04270 | 0,430 | 240372_at    | Transcribed locus                                                            | -           |
| 401   | 6,43     | 7,17    | -1,12 | 0,00209 | 0,285 | 244863_at    | Transcribed locus                                                            | -           |
| 3679  | 5,51     | 6,15    | -1,12 | 0,02658 | 0,395 | 224258_at    | Endozepine-like protein type 1 mutant                                        | -           |
| 1173  | 5,18     | 5,78    | -1,12 | 0,00689 | 0,321 | 1560856_at   | Clone IMAGE:5742065, mRNA                                                    | -           |
| 4148  | 16,4     | 18,3    | -1,12 | 0,03061 | 0,403 | 232091_s_at  | Zinc finger, DHHC-type containing 24                                         | ZDHHC24     |
| 5439  | 18,5     | 20,6    | -1,12 | 0,04287 | 0,431 | 239628_at    | Transcribed locus                                                            | -           |
| 152   | 3,19     | 3,56    | -1,12 | 0,00070 | 0,244 | 208481_at    | Ankyrin repeat and SOCS box-containing 4                                     | ASB4        |
| 4072  | 6,43     | 7,17    | -1,12 | 0,02986 | 0,401 | 234187_at    | cDNA FLJ22754 fis, clone KAIA0615                                            | -           |
| 2403  | 10,3     | 11,5    | -1,12 | 0,01603 | 0,365 | 234037_s_at  | cDNA FLJ22846 fis, clone KAIA555                                             | -           |
| 1823  | 3,48     | 3,88    | -1,12 | 0,01174 | 0,351 | 237050_at    | Similar to Potassium channel tetramerisation domain containing 17 isoform 2  | -           |
| 1586  | 15,1     | 16,9    | -1,12 | 0,00987 | 0,340 | 222012_at    | Hypothetical protein BC002926                                                | LOC90379    |
| 4644  | 17,0     | 18,9    | -1,12 | 0,03503 | 0,412 | 229496_at    | CLP1, cleavage and polyadenylation factor I subunit, homolog (S. cerevisiae) | CLP1        |
| 2202  | 9,62     | 10,7    | -1,12 | 0,01457 | 0,361 | 239257_at    | Mov10l1, Moloney leukemia virus 10-like 1, homolog (mouse)                   | MOV10L1     |
| 4688  | 3,19     | 3,56    | -1,12 | 0,03540 | 0,413 | 214554_at    | Histone cluster 1, H2ak                                                      | HIST1H2AK   |
| 557   | 10,2     | 11,4    | -1,12 | 0,00302 | 0,296 | 1553115_at   | Naked cuticle homolog 1 (Drosophila)                                         | NKD1        |
| 4195  | 14,6     | 16,3    | -1,12 | 0,03098 | 0,404 | 238276_at    | Transcribed locus                                                            | -           |
| 3875  | 13,4     | 15,0    | -1,12 | 0,02829 | 0,399 | 230453_s_at  | ATPase, Ca++ transporting, ubiquitous                                        | ATP2A3      |
| 1610  | 6,58     | 7,34    | -1,12 | 0,01009 | 0,342 | 244438_at    | Similar to N-myc proto-oncogene protein                                      | -           |
| 1189  | 4,79     | 5,34    | -1,12 | 0,00703 | 0,322 | 240646_at    | GTPase, IMAP family member 8                                                 | GIMAP8      |
| 2157  | 3,24     | 3,61    | -1,12 | 0,01422 | 0,360 | 230673_at    | Polycystic kidney and hepatic disease-like 1                                 | PKHD1L1     |
| 3121  | 11,6     | 13,0    | -1,12 | 0,02209 | 0,387 | 1557590_at   | Hypothetical protein LOC147299                                               | LOC147299   |
| 5179  | 12,1     | 13,5    | -1,12 | 0,03991 | 0,421 | 242341_x_at  | Glycerate kinase                                                             | GLYCTK      |
| 2639  | 4,78     | 5,33    | -1,12 | 0,01799 | 0,373 | 243035_at    | Transcribed locus                                                            | -           |
| 4454  | 7,00     | 7,81    | -1,12 | 0,03345 | 0,411 | 213978_at    | Actin-bundling protein with BAIAP2 homology                                  | ABBA-1      |

| Index | Mutated* | Normal* | FC    | P value | FDR** | Probe set   | Description                                                     | Gene symbol      |
|-------|----------|---------|-------|---------|-------|-------------|-----------------------------------------------------------------|------------------|
| 4518  | 4,46     | 4,98    | -1,12 | 0,03406 | 0,412 | 240209_at   | Chromosome 16 open reading frame 78                             | <i>C16orf78</i>  |
| 829   | 4,42     | 4,93    | -1,12 | 0,00474 | 0,312 | 215345_x_at | T cell receptor gamma variable 7                                | <i>TRGV7</i>     |
| 4954  | 6,36     | 7,10    | -1,12 | 0,03800 | 0,419 | 217633_at   | URB1 ribosome biogenesis 1 homolog ( <i>S. cerevisiae</i> )     | <i>URB1</i>      |
| 1140  | 4,48     | 4,99    | -1,12 | 0,00668 | 0,320 | 1561706_at  | cDNA DKFZp547N0516                                              | -                |
| 2452  | 6,07     | 6,77    | -1,12 | 0,01645 | 0,366 | 221186_at   | cDNA FLJ12781 fis, clone NT2RP2001861                           | -                |
| 1692  | 5,22     | 5,82    | -1,11 | 0,01071 | 0,346 | 233523_at   | Chromosome 20 open reading frame 186                            | <i>C20orf186</i> |
| 4386  | 5,46     | 6,09    | -1,11 | 0,03268 | 0,407 | 213949_s_at | Deoxyhypusine hydroxylase/monooxygenase                         | <i>DOHH</i>      |
| 2101  | 8,91     | 9,93    | -1,11 | 0,01378 | 0,358 | 207311_at   | Double C2-like domains, beta                                    | <i>DOC2B</i>     |
| 5892  | 17,8     | 19,9    | -1,11 | 0,04766 | 0,442 | 223994_s_at | Solute carrier family 12, member 9                              | <i>SLC12A9</i>   |
| 4186  | 5,71     | 6,37    | -1,11 | 0,03095 | 0,404 | 241398_at   | Metallophosphoesterase domain containing 1                      | <i>MPPED1</i>    |
| 2308  | 4,52     | 5,04    | -1,11 | 0,01532 | 0,363 | 232352_at   | ISL LIM homeobox 2                                              | <i>ISL2</i>      |
| 1416  | 5,10     | 5,69    | -1,11 | 0,00858 | 0,331 | 221289_at   | Distal-less homeobox 6                                          | <i>DLX6</i>      |
| 3967  | 12,3     | 13,7    | -1,11 | 0,02898 | 0,399 | 1554175_at  | CD300 molecule-like family member b                             | <i>CD300LB</i>   |
| 4058  | 23,8     | 26,5    | -1,11 | 0,02977 | 0,401 | 1563808_at  | MCF.2 cell line derived transforming sequence-like              | <i>MCF2L</i>     |
| 2227  | 39,4     | 43,9    | -1,11 | 0,01480 | 0,363 | 218551_at   | Invasion inhibitory protein 45                                  | <i>MIIP</i>      |
| 863   | 4,90     | 5,46    | -1,11 | 0,00497 | 0,313 | 215740_at   | cDNA FLJ12573 fis, clone NT2RM4000979                           | -                |
| 5270  | 4,06     | 4,52    | -1,11 | 0,04093 | 0,425 | 205289_at   | Bone morphogenetic protein 2                                    | <i>BMP2</i>      |
| 4331  | 5,66     | 6,31    | -1,11 | 0,03224 | 0,407 | 210508_s_at | Potassium voltage-gated channel, KQT-like subfamily, member 2   | <i>KCNQ2</i>     |
| 5823  | 6,97     | 7,77    | -1,11 | 0,04705 | 0,442 | 1553544_at  | G protein-coupled receptor 101                                  | <i>GPR101</i>    |
| 3785  | 4,22     | 4,71    | -1,11 | 0,02757 | 0,398 | 217177_s_at | cDNA FLJ13658 fis, clone PLACE1011567                           | -                |
| 4467  | 6,78     | 7,56    | -1,11 | 0,03355 | 0,411 | 240891_at   | Follistatin-like 1                                              | <i>FSTL1</i>     |
| 5773  | 11,3     | 12,6    | -1,11 | 0,04639 | 0,439 | 241747_s_at | Cullin 7                                                        | <i>CUL7</i>      |
| 5229  | 6,31     | 7,04    | -1,11 | 0,04046 | 0,423 | 1570282_at  | -                                                               | -                |
| 1040  | 4,81     | 5,36    | -1,11 | 0,00605 | 0,318 | 1559568_at  | cDNA DKFZp313C0731                                              | -                |
| 3177  | 8,53     | 9,50    | -1,11 | 0,02254 | 0,387 | 244520_at   | Transcribed locus                                               | -                |
| 1611  | 4,95     | 5,52    | -1,11 | 0,01009 | 0,342 | 219839_x_at | T-cell leukemia/lymphoma 6                                      | <i>TCL6</i>      |
| 3829  | 6,10     | 6,80    | -1,11 | 0,02795 | 0,399 | 239094_at   | Hypothetical protein LOC730961                                  | <i>LOC730961</i> |
| 3222  | 15,4     | 17,1    | -1,11 | 0,02283 | 0,387 | 1552995_at  | Interleukin 27                                                  | <i>IL27</i>      |
| 5355  | 7,25     | 8,08    | -1,11 | 0,04201 | 0,429 | 205874_at   | Inositol 1,4,5-trisphosphate 3-kinase A                         | <i>ITPKA</i>     |
| 4801  | 23,7     | 26,5    | -1,11 | 0,03643 | 0,415 | 231305_at   | Transcribed locus                                               | -                |
| 2567  | 7,11     | 7,93    | -1,11 | 0,01740 | 0,371 | 1555542_at  | Actin filament associated protein 1-like 1                      | <i>AFAP1L1</i>   |
| 2514  | 3,78     | 4,21    | -1,11 | 0,01693 | 0,368 | 1563092_at  | mRNA full length insert cDNA clone EUROIMAGE 712308             | -                |
| 5660  | 14,2     | 15,9    | -1,11 | 0,04515 | 0,436 | 217095_x_at | Natural cytotoxicity triggering receptor 1                      | <i>NCR1</i>      |
| 589   | 4,74     | 5,29    | -1,11 | 0,00325 | 0,301 | 216729_at   | cDNA FLJ21735 fis, clone COLF3350                               | -                |
| 4199  | 22,8     | 25,4    | -1,11 | 0,03104 | 0,404 | 1554516_at  | Hypothetical protein LOC203274                                  | <i>LOC203274</i> |
| 1992  | 3,99     | 4,44    | -1,11 | 0,01303 | 0,355 | 240732_at   | Transcribed locus                                               | -                |
| 4370  | 11,6     | 12,9    | -1,11 | 0,03252 | 0,407 | 201269_s_at | NudC domain containing 3                                        | <i>NUDCD3</i>    |
| 6009  | 6,13     | 6,83    | -1,11 | 0,04883 | 0,444 | 204499_at   | ATP/GTP binding protein 1                                       | <i>AGTPBP1</i>   |
| 4420  | 45,7     | 50,8    | -1,11 | 0,03309 | 0,409 | 221890_at   | Zinc finger protein 335                                         | <i>ZNF335</i>    |
| 4082  | 4,85     | 5,40    | -1,11 | 0,02998 | 0,402 | 222055_at   | Fumarylacetoacetate hydrolase domain containing 2A              | <i>FAHD2A</i>    |
| 3373  | 22,6     | 25,2    | -1,11 | 0,02400 | 0,389 | 231355_at   | cDNA FLJ30598 fis, clone BRAWH2009263                           | -                |
| 939   | 3,98     | 4,44    | -1,11 | 0,00538 | 0,313 | 222189_at   | Hypothetical LOC646649                                          | <i>LOC646649</i> |
| 3432  | 7,88     | 8,77    | -1,11 | 0,02457 | 0,391 | 231428_at   | Transcribed locus                                               | -                |
| 5519  | 24,9     | 27,8    | -1,11 | 0,04379 | 0,433 | 216551_x_at | Phospholipase C, gamma 1                                        | <i>PLCG1</i>     |
| 3928  | 5,86     | 6,52    | -1,11 | 0,02873 | 0,399 | 238405_at   | Transcribed locus                                               | -                |
| 2954  | 12,7     | 14,1    | -1,11 | 0,02074 | 0,384 | 244182_at   | Clone IMAGE:5756056, mRNA                                       | -                |
| 3481  | 16,8     | 18,7    | -1,11 | 0,02499 | 0,392 | 207892_at   | CD40 ligand (TNF superfamily, member 5, hyper-IgM syndrome)     | <i>CD40LG</i>    |
| 2779  | 8,18     | 9,11    | -1,11 | 0,01930 | 0,380 | 1560618_at  | Clone IMAGE:5186867, mRNA                                       | -                |
| 3886  | 21,8     | 24,3    | -1,11 | 0,02838 | 0,399 | 223733_s_at | Protein phosphatase 4, regulatory subunit 1-like                | <i>PPP4R1L</i>   |
| 612   | 4,30     | 4,79    | -1,11 | 0,00346 | 0,308 | 231373_at   | Ring finger protein 133                                         | <i>RNF133</i>    |
| 3769  | 8,16     | 9,09    | -1,11 | 0,02738 | 0,397 | 223508_at   | Notch homolog 1, translocation-associated ( <i>Drosophila</i> ) | <i>NOTCH1</i>    |
| 4338  | 17,1     | 19,0    | -1,11 | 0,03229 | 0,407 | 1561403_at  | Spermatogenesis and oogenesis specific basic helix-loop-helix 1 | <i>SOHLH1</i>    |
| 748   | 2,98     | 3,31    | -1,11 | 0,00424 | 0,308 | 237551_at   | URB1 ribosome biogenesis 1 homolog ( <i>S. cerevisiae</i> )     | <i>URB1</i>      |
| 5171  | 9,30     | 10,4    | -1,11 | 0,03983 | 0,421 | 203673_at   | Thyroglobulin                                                   | <i>TG</i>        |
| 5759  | 6,11     | 6,80    | -1,11 | 0,04626 | 0,439 | 211380_s_at | Protein kinase, cGMP-dependent, type I                          | <i>PRKG1</i>     |
| 369   | 3,21     | 3,57    | -1,11 | 0,00194 | 0,284 | 233886_at   | cDNA DKFZp564F172                                               | -                |
| 5905  | 26,5     | 29,5    | -1,11 | 0,04784 | 0,443 | 209415_at   | fizzy/cell division cycle 20 related 1 ( <i>Drosophila</i> )    | <i>FZR1</i>      |



| Index | Mutated* | Normal* | FC    | P value | FDR** | Probe set    | Description                                                | Gene symbol |
|-------|----------|---------|-------|---------|-------|--------------|------------------------------------------------------------|-------------|
| 5236  | 13,4     | 14,9    | -1,11 | 0,04051 | 0,423 | 217490_at    | cDNA DKFZp564P073                                          | -           |
| 3556  | 4,75     | 5,29    | -1,11 | 0,02565 | 0,394 | 223756_at    | Hypothetical protein FLJ10081                              | FLJ10081    |
| 2961  | 8,61     | 9,59    | -1,11 | 0,02081 | 0,384 | 204801_s_at  | Dehydrogenase/reductase (SDR family) member 12             | DHRS12      |
| 1225  | 11,2     | 12,4    | -1,11 | 0,00729 | 0,324 | 223536_at    | Pleckstrin and Sec7 domain containing 2                    | PSD2        |
| 907   | 4,37     | 4,87    | -1,11 | 0,00524 | 0,313 | 1562116_at   | Clone IMAGE:5191738, mRNA                                  | -           |
| 1350  | 5,04     | 5,61    | -1,11 | 0,00811 | 0,328 | 231150_at    | Transcribed locus                                          | -           |
| 5558  | 19,1     | 21,3    | -1,11 | 0,04425 | 0,435 | 232907_at    | Ubiquitin protein ligase E3 component n-recognin 4         | UBR4        |
| 633   | 14,6     | 16,2    | -1,11 | 0,00361 | 0,308 | 1566268_at   | Full length insert cDNA YR25G06                            | -           |
| 2731  | 30,8     | 34,3    | -1,11 | 0,01881 | 0,377 | 89948_at     | Chromosome 20 open reading frame 67                        | C20orf67    |
| 4411  | 5,56     | 6,18    | -1,11 | 0,03294 | 0,408 | 1569264_at   | Hypothetical gene supported by BC013370                    | LOC400655   |
| 4181  | 9,43     | 10,5    | -1,11 | 0,03091 | 0,404 | 235541_at    | LAS1-like (S. cerevisiae)                                  | LAS1L       |
| 2207  | 41,0     | 45,6    | -1,11 | 0,01459 | 0,361 | 632_at       | Glycogen synthase kinase 3 alpha                           | GSK3A       |
| 3133  | 5,95     | 6,62    | -1,11 | 0,02222 | 0,387 | 217702_at    | Interleukin 27 receptor, alpha                             | IL27RA      |
| 5776  | 10,7     | 11,9    | -1,11 | 0,04647 | 0,440 | 1559478_at   | cDNA clone IMAGE:5270289                                   | -           |
| 5336  | 3,38     | 3,76    | -1,11 | 0,04178 | 0,428 | 231449_at    | Transcribed locus                                          | -           |
| 5396  | 7,22     | 8,03    | -1,11 | 0,04231 | 0,429 | 207792_at    | Opioid receptor, delta 1                                   | OPRD1       |
| 923   | 3,30     | 3,67    | -1,11 | 0,00532 | 0,313 | 1562216_at   | -                                                          | -           |
| 5805  | 19,4     | 21,6    | -1,11 | 0,04685 | 0,441 | 223726_at    | Potassium voltage-gated channel, subfamily H member 3      | KCNH3       |
| 3680  | 11,4     | 12,7    | -1,11 | 0,02658 | 0,395 | 1556669_a_at | Full length insert cDNA clone YR71G12                      | -           |
| 1886  | 5,12     | 5,70    | -1,11 | 0,01224 | 0,355 | 231066_s_at  | Chloride channel 4                                         | CLCN4       |
| 307   | 3,13     | 3,48    | -1,11 | 0,00148 | 0,263 | 237240_at    | Transcribed locus                                          | -           |
| 2169  | 24,2     | 26,9    | -1,11 | 0,01435 | 0,361 | 1562981_at   | Hemoglobin, beta                                           | HBB         |
| 639   | 5,85     | 6,51    | -1,11 | 0,00363 | 0,308 | 242867_x_at  | Transcribed locus                                          | -           |
| 1125  | 4,96     | 5,52    | -1,11 | 0,00657 | 0,319 | 243441_at    | Transcribed locus                                          | -           |
| 3246  | 5,28     | 5,87    | -1,11 | 0,02303 | 0,388 | 206417_at    | Cyclic nucleotide gated channel alpha 1                    | CNGA1       |
| 1362  | 4,03     | 4,48    | -1,11 | 0,00820 | 0,328 | 231742_at    | Cone-rod homeobox                                          | CRX         |
| 3908  | 38,9     | 43,3    | -1,11 | 0,02853 | 0,399 | 204692_at    | Leucine rich repeat neuronal 4                             | LRCH4       |
| 2538  | 3,30     | 3,67    | -1,11 | 0,01717 | 0,369 | 1561678_at   | cDNA clone IMAGE:5266579                                   | -           |
| 3616  | 12,1     | 13,4    | -1,11 | 0,02611 | 0,395 | 212389_at    | SET binding factor 1                                       | SBF1        |
| 4773  | 26,1     | 29,0    | -1,11 | 0,03620 | 0,414 | 231553_s_at  | Flavoprotein oxidoreductase MICAL3                         | MICAL3      |
| 2036  | 4,15     | 4,61    | -1,11 | 0,01326 | 0,355 | 228872_at    | Family with sequence similarity 108, member B1             | FAM108B1    |
| 974   | 3,56     | 3,96    | -1,11 | 0,00566 | 0,315 | 1564209_at   | Hypothetical protein LOC282980                             | LOC282980   |
| 2805  | 8,54     | 9,50    | -1,11 | 0,01952 | 0,380 | 207644_at    | Forkhead box H1                                            | FOXH1       |
| 3095  | 4,32     | 4,81    | -1,11 | 0,02182 | 0,385 | 228659_at    | -                                                          | -           |
| 3847  | 24,9     | 27,6    | -1,11 | 0,02808 | 0,399 | 1557656_at   | Hypothetical gene supported by AK093266                    | LOC400238   |
| 3369  | 11,1     | 12,3    | -1,11 | 0,02396 | 0,389 | 234397_at    | -                                                          | -           |
| 1518  | 5,12     | 5,69    | -1,11 | 0,00938 | 0,337 | 210107_at    | Chloride channel, calcium activated, family member 1       | CLCA1       |
| 5550  | 14,0     | 15,5    | -1,11 | 0,04413 | 0,435 | 1557630_s_at | cDNA clone IMAGE:5273415                                   | -           |
| 2709  | 6,79     | 7,54    | -1,11 | 0,01860 | 0,375 | 1559578_at   | cDNA FLJ31857 fis, clone NT2RP7001156                      | -           |
| 3978  | 8,16     | 9,07    | -1,11 | 0,02908 | 0,400 | 206986_at    | Hypothetical protein LOC728985                             | LOC728985   |
| 6122  | 4,86     | 5,40    | -1,11 | 0,04998 | 0,446 | 229332_at    | 4-hydroxyphenylpyruvate dioxygenase-like                   | HPDL        |
| 225   | 3,36     | 3,73    | -1,11 | 0,00104 | 0,250 | 1570263_at   | -                                                          | -           |
| 1354  | 5,01     | 5,57    | -1,11 | 0,00813 | 0,328 | 1557693_at   | cDNA clone IMAGE:5303580                                   | -           |
| 4624  | 9,48     | 10,5    | -1,11 | 0,03488 | 0,412 | 234575_at    | Zinc finger protein 71                                     | ZNF71       |
| 5128  | 3,67     | 4,08    | -1,11 | 0,03946 | 0,421 | 223796_at    | Contactin associated protein-like 3                        | CNTNAP3     |
| 2663  | 4,96     | 5,51    | -1,11 | 0,01819 | 0,374 | 207359_at    | Calcium/calmodulin-dependent protein kinase kinase 2, beta | CAMKK2      |
| 3215  | 6,51     | 7,24    | -1,11 | 0,02277 | 0,387 | 238373_at    | H1 histone family, member N, testis-specific               | H1FNT       |
| 3392  | 5,11     | 5,68    | -1,11 | 0,02416 | 0,389 | 1560153_at   | Fraser syndrome 1                                          | FRAS1       |
| 3535  | 32,1     | 35,7    | -1,11 | 0,02543 | 0,393 | 1563315_s_at | Glutamate-rich 1                                           | ERICH1      |
| 5537  | 4,15     | 4,61    | -1,11 | 0,04396 | 0,434 | 224195_at    | Testis-specific transcript, Y-linked 12                    | TTY12       |
| 4545  | 8,33     | 9,25    | -1,11 | 0,03436 | 0,412 | 228079_at    | Chromosome 3 open reading frame 58                         | C3orf58     |
| 3206  | 8,56     | 9,51    | -1,11 | 0,02270 | 0,387 | 243343_at    | Transcribed locus                                          | -           |
| 2582  | 14,6     | 16,2    | -1,11 | 0,01752 | 0,371 | 221328_at    | Claudin 17                                                 | CLDN17      |
| 5971  | 9,32     | 10,4    | -1,11 | 0,04849 | 0,444 | 216019_x_at  | Pleckstrin homology-like domain, family B, member 1        | PHLDB1      |
| 1732  | 5,65     | 6,28    | -1,11 | 0,01105 | 0,348 | 216226_at    | Transcription initiation factor TFIID 105 kDa subunit      | TAF4B       |
| 4257  | 7,46     | 8,28    | -1,11 | 0,03163 | 0,406 | 233733_at    | cDNA DKFZp434E1920                                         | -           |
| 2625  | 5167     | 5741    | -1,11 | 0,01784 | 0,372 | 1553551_s_at | -                                                          | -           |

| Index | Mutated* | Normal* | FC    | P value | FDR** | Probe set    | Description                                                       | Gene symbol |
|-------|----------|---------|-------|---------|-------|--------------|-------------------------------------------------------------------|-------------|
| 5064  | 7,61     | 8,45    | -1,11 | 0,03897 | 0,420 | 243987_at    | Similar to XP_001136680.1                                         | -           |
| 4394  | 5,75     | 6,39    | -1,11 | 0,03275 | 0,407 | 1554115_at   | Hypothetical gene LOC133874                                       | LOC133874   |
| 2392  | 4,27     | 4,74    | -1,11 | 0,01596 | 0,365 | 237275_at    | Similar to Otoconin 90                                            | -           |
| 82    | 3,71     | 4,12    | -1,11 | 0,00031 | 0,201 | 241055_at    | Endothelial PAS domain protein 1                                  | EPAS1       |
| 1931  | 15,7     | 17,4    | -1,11 | 0,01258 | 0,355 | 1555742_at   | -                                                                 | -           |
| 3085  | 5,96     | 6,62    | -1,11 | 0,02174 | 0,385 | 234456_at    | Trafficking protein particle complex 4                            | TRAPPC4     |
| 5574  | 4,61     | 5,13    | -1,11 | 0,04439 | 0,435 | 1560399_a_at | OTU domain containing 7A                                          | OTUD7A      |
| 4479  | 6,95     | 7,73    | -1,11 | 0,03369 | 0,411 | 240169_at    | Full length insert cDNA clone YO64F11                             | -           |
| 586   | 7,85     | 8,72    | -1,11 | 0,00324 | 0,301 | 235909_at    | Hypothetical gene supported by BC040598                           | LOC400960   |
| 5815  | 4,59     | 5,10    | -1,11 | 0,04698 | 0,442 | 221323_at    | UL16 binding protein 1                                            | ULBP1       |
| 1525  | 3,71     | 4,13    | -1,11 | 0,00942 | 0,337 | 1558534_at   | Hypothetical gene LOC283846                                       | -           |
| 2384  | 6,11     | 6,79    | -1,11 | 0,01589 | 0,364 | 1557908_at   | cDNA FLJ37090 fis, clone BRACE2017587                             | -           |
| 5297  | 6,29     | 6,99    | -1,11 | 0,04127 | 0,426 | 228807_at    | -                                                                 | -           |
| 3063  | 11,4     | 12,6    | -1,11 | 0,02159 | 0,385 | 215420_at    | Indian hedgehog homolog (Drosophila)                              | IHH         |
| 3446  | 18,0     | 20,0    | -1,11 | 0,02466 | 0,391 | 1558211_s_at | v-src sarcoma (Schmidt-Ruppin A-2) viral oncogene homolog (avian) | SRC         |
| 1916  | 7,71     | 8,56    | -1,11 | 0,01250 | 0,355 | 241892_at    | Transcribed locus                                                 | -           |
| 1440  | 5,79     | 6,43    | -1,11 | 0,00876 | 0,332 | 222285_at    | immunoglobulin heavy constant delta                               | IGHD        |
| 3293  | 8,92     | 9,91    | -1,11 | 0,02345 | 0,388 | 235087_at    | Unkempt homolog (Drosophila)-like                                 | UNKL        |
| 3893  | 11,2     | 12,4    | -1,11 | 0,02844 | 0,399 | 1555021_a_at | Scavenger receptor class F, member 1                              | SCARF1      |
| 1265  | 20,2     | 22,4    | -1,11 | 0,00753 | 0,325 | 211350_s_at  | Chromosome 6 open reading frame 54                                | C6orf54     |
| 2898  | 24,7     | 27,4    | -1,11 | 0,02035 | 0,383 | 223525_at    | Delta-like 4 (Drosophila)                                         | DLL4        |
| 832   | 3,55     | 3,95    | -1,11 | 0,00475 | 0,312 | 1566279_at   | -                                                                 | -           |
| 695   | 2,91     | 3,23    | -1,11 | 0,00400 | 0,308 | 1562443_at   | Retinaldehyde binding protein 1-like 2                            | RLBP1L2     |
| 6082  | 7,91     | 8,78    | -1,11 | 0,04966 | 0,446 | 231454_at    | Placenta-specific 4                                               | PLAC4       |
| 2730  | 12,2     | 13,6    | -1,11 | 0,01881 | 0,377 | 214898_x_at  | Mucin 3B, cell surface associated                                 | MUC3B       |
| 5849  | 8,97     | 9,96    | -1,11 | 0,04730 | 0,442 | 1555063_at   | Ubiquitin specific peptidase 6                                    | USP6        |
| 4870  | 8,19     | 9,09    | -1,11 | 0,03718 | 0,417 | 222695_s_at  | Axin 2 (conductin, axil)                                          | AXIN2       |
| 2675  | 4,97     | 5,52    | -1,11 | 0,01830 | 0,374 | 237558_at    | Transcribed locus                                                 | -           |
| 2323  | 4,16     | 4,61    | -1,11 | 0,01546 | 0,364 | 1562965_at   | Clone IMAGE:5744268, mRNA                                         | -           |
| 5115  | 16,8     | 18,7    | -1,11 | 0,03938 | 0,421 | 233486_at    | Hypothetical protein LOC729940                                    | LOC729940   |
| 5383  | 6,03     | 6,70    | -1,11 | 0,04221 | 0,429 | 243376_at    | TRAF family member-associated NFKB activator                      | TANK        |
| 4561  | 4,30     | 4,77    | -1,11 | 0,03446 | 0,412 | 206078_at    | Kalirin, RhoGEF kinase                                            | KALRN       |
| 4443  | 30,3     | 33,7    | -1,11 | 0,03338 | 0,411 | 210737_at    | Tubby homolog (mouse)                                             | TUB         |
| 1687  | 4,27     | 4,74    | -1,11 | 0,01066 | 0,345 | 207913_at    | Similar to Cytochrome P450, family 2, subfamily F, polypeptide 1  | LOC731992   |
| 4188  | 5,38     | 5,97    | -1,11 | 0,03096 | 0,404 | 240283_at    | -                                                                 | -           |
| 5443  | 14,5     | 16,1    | -1,11 | 0,04293 | 0,431 | 214968_at    | DEAD (Asp-Glu-Ala-Asp) box polypeptide 51                         | DDX51       |
| 5456  | 7,50     | 8,33    | -1,11 | 0,04308 | 0,432 | 206839_at    | Chromosome 22 open reading frame 31                               | C22orf31    |
| 4014  | 6,71     | 7,45    | -1,11 | 0,02939 | 0,400 | 244577_at    | Transcribed locus                                                 | -           |
| 2837  | 4,83     | 5,36    | -1,11 | 0,01980 | 0,382 | 224086_at    | -                                                                 | -           |
| 4251  | 18,6     | 20,6    | -1,11 | 0,03157 | 0,406 | 211624_s_at  | Dopamine receptor D2                                              | DRD2        |
| 4663  | 21,8     | 24,2    | -1,11 | 0,03520 | 0,413 | 216481_at    | Glutamate receptor interacting protein 2                          | GRIP2       |
| 869   | 3,70     | 4,11    | -1,11 | 0,00502 | 0,313 | 231501_at    | Similar to XP_001141902.1                                         | -           |
| 763   | 5,84     | 6,49    | -1,11 | 0,00430 | 0,308 | 1567540_at   | Sperm associated antigen 10                                       | SPAG10      |
| 4854  | 24,8     | 27,5    | -1,11 | 0,03701 | 0,417 | 210226_at    | Nuclear receptor subfamily 4, group A, member 1                   | NR4A1       |
| 3702  | 6,14     | 6,82    | -1,11 | 0,02677 | 0,395 | 234671_at    | Keratin associated protein 4-2                                    | KRTAP4-2    |
| 438   | 4,18     | 4,63    | -1,11 | 0,00232 | 0,288 | 240640_at    | -                                                                 | -           |
| 3197  | 7,32     | 8,13    | -1,11 | 0,02265 | 0,387 | 244127_at    | Transcribed locus                                                 | -           |
| 5985  | 3,81     | 4,22    | -1,11 | 0,04861 | 0,444 | 210492_at    | Microfibrillar-associated protein 3-like                          | MFAP3L      |
| 2752  | 10,0     | 11,1    | -1,11 | 0,01905 | 0,378 | 244421_at    | Transcribed locus                                                 | -           |
| 4131  | 6,27     | 6,96    | -1,11 | 0,03041 | 0,402 | 237207_at    | Transcribed locus                                                 | -           |
| 4268  | 7,32     | 8,12    | -1,11 | 0,03174 | 0,406 | 1557279_at   | intersectin 1 (SH3 domain protein)                                | ITSN1       |
| 5590  | 13,8     | 15,3    | -1,11 | 0,04458 | 0,436 | 210457_x_at  | High mobility group AT-hook 1                                     | HMGA1       |
| 294   | 3,80     | 4,22    | -1,11 | 0,00144 | 0,263 | 210921_at    | -                                                                 | -           |
| 4814  | 15,1     | 16,8    | -1,11 | 0,03659 | 0,416 | 216183_at    | Transglutaminase 2                                                | TGM2        |
| 3519  | 4,71     | 5,23    | -1,11 | 0,02526 | 0,392 | 1564443_at   | Deleted in lymphocytic leukemia, 2                                | DLEU2       |
| 429   | 6,27     | 6,96    | -1,11 | 0,00226 | 0,288 | 207385_at    | Transcription factor Dp family, member 3                          | TFDP3       |
| 4035  | 4,71     | 5,22    | -1,11 | 0,02956 | 0,401 | 214599_at    | Involucrin                                                        | IVL         |

| Index | Mutated* | Normal* | FC    | P value | FDR** | Probe set    | Description                                                                   | Gene symbol |
|-------|----------|---------|-------|---------|-------|--------------|-------------------------------------------------------------------------------|-------------|
| 2173  | 8,64     | 9,58    | -1,11 | 0,01436 | 0,361 | 240497_at    | -                                                                             | -           |
| 5327  | 8,36     | 9,28    | -1,11 | 0,04164 | 0,427 | 240001_at    | -                                                                             | -           |
| 2206  | 7,64     | 8,48    | -1,11 | 0,01459 | 0,361 | 217077_s_at  | Gamma-aminobutyric acid (GABA) B receptor, 2                                  | GABBR2      |
| 4134  | 20,9     | 23,2    | -1,11 | 0,03043 | 0,402 | 236441_at    | Transcribed locus                                                             | -           |
| 840   | 5,31     | 5,89    | -1,11 | 0,00481 | 0,313 | 1554372_at   | -                                                                             | -           |
| 3579  | 3,94     | 4,37    | -1,11 | 0,02584 | 0,394 | 236638_at    | Transcribed locus                                                             | -           |
| 1377  | 3,76     | 4,17    | -1,11 | 0,00830 | 0,329 | 234603_at    | cDNA DKFZp566E213                                                             | -           |
| 5284  | 4,36     | 4,84    | -1,11 | 0,04110 | 0,425 | 230480_at    | Piwi-like 4 (Drosophila)                                                      | PIWIL4      |
| 2029  | 4,05     | 4,50    | -1,11 | 0,01323 | 0,355 | 1569283_at   | HCG1646157 protein                                                            | -           |
| 660   | 12,8     | 14,2    | -1,11 | 0,00382 | 0,308 | 244307_s_at  | Synaptotagmin XV                                                              | SYT15       |
| 5260  | 6,34     | 7,03    | -1,11 | 0,04085 | 0,425 | 240565_at    | Zinc finger protein 28 homolog (mouse)                                        | ZFP28       |
| 3315  | 3,51     | 3,89    | -1,11 | 0,02356 | 0,388 | 1556476_at   | Hypothetical protein LOC283485                                                | LOC283485   |
| 1206  | 3,46     | 3,83    | -1,11 | 0,00715 | 0,324 | 231160_at    | Transcribed locus                                                             | -           |
| 2255  | 6,10     | 6,77    | -1,11 | 0,01501 | 0,363 | 234239_at    | cDNA FLJ21668 fis, clone COL08982                                             | -           |
| 4204  | 5,94     | 6,59    | -1,11 | 0,03109 | 0,404 | 1554583_a_at | Hypothetical protein MGC50559                                                 | MGC50559    |
| 4977  | 5,09     | 5,64    | -1,11 | 0,03819 | 0,419 | 210602_s_at  | Cadherin 6, type 2, K-Cadherin (fetal kidney)                                 | CDH6        |
| 3693  | 18,4     | 20,4    | -1,11 | 0,02668 | 0,395 | 208347_at    | -                                                                             | -           |
| 1645  | 3,64     | 4,04    | -1,11 | 0,01036 | 0,344 | 1562712_at   | Clone IMAGE:5165425, mRNA                                                     | -           |
| 4785  | 13,3     | 14,8    | -1,11 | 0,03628 | 0,414 | 203937_s_at  | Transcription initiation factor SL1/TIF-IB subunit C                          | TAF1C       |
| 1892  | 5,82     | 6,46    | -1,11 | 0,01228 | 0,355 | 1553031_at   | G protein-coupled receptor 115                                                | GPR115      |
| 561   | 3,85     | 4,27    | -1,11 | 0,00306 | 0,298 | 233283_at    | cDNA FLJ14025 fis, clone HEMBA1003667                                         | -           |
| 910   | 4,96     | 5,50    | -1,11 | 0,00525 | 0,313 | 208563_x_at  | POU class 3 homeobox 3                                                        | POU3F3      |
| 3440  | 9,16     | 10,2    | -1,11 | 0,02463 | 0,391 | 1556107_at   | cDNA DKFZp667C1617                                                            | -           |
| 5008  | 64,9     | 72,0    | -1,11 | 0,03847 | 0,420 | 206635_at    | Cholinergic receptor, nicotinic, beta 2 (neuronal)                            | CHRN2       |
| 2556  | 4,81     | 5,33    | -1,11 | 0,01729 | 0,370 | 1563171_at   | cDNA clone IMAGE:5165280                                                      | -           |
| 2277  | 6,83     | 7,58    | -1,11 | 0,01514 | 0,363 | 215594_at    | PTR2 mRNA for repetitive sequence                                             | -           |
| 4551  | 8,32     | 9,23    | -1,11 | 0,03441 | 0,412 | 232913_at    | Transmembrane emp24 protein transport domain containing 8                     | TMED8       |
| 2671  | 9,45     | 10,5    | -1,11 | 0,01826 | 0,374 | 231224_x_at  | Protein kinase, AMP-activated, gamma 2 non-catalytic subunit                  | PRKAG2      |
| 5505  | 126      | 140     | -1,11 | 0,04359 | 0,433 | 1569522_at   | Clone IMAGE:4424208, mRNA                                                     | -           |
| 1159  | 9,02     | 10,0    | -1,11 | 0,00681 | 0,321 | 221112_at    | Interleukin 1 receptor accessory protein-like 2                               | IL1RAPL2    |
| 6070  | 20,6     | 22,9    | -1,11 | 0,04955 | 0,446 | 1566954_at   | cDNA FLJ20891 fis, clone ADKA03345                                            | -           |
| 4445  | 8,76     | 9,72    | -1,11 | 0,03340 | 0,411 | 211147_s_at  | Purinergic receptor P2X-like 1, orphan receptor                               | P2RXL1      |
| 943   | 6,47     | 7,18    | -1,11 | 0,00541 | 0,313 | 1558770_a_at | Chromosome 17 open reading frame 38                                           | C17orf38    |
| 4556  | 8,79     | 9,75    | -1,11 | 0,03444 | 0,412 | 1559977_a_at | Solute carrier family 25, member 34                                           | SLC25A34    |
| 5871  | 29,8     | 33,0    | -1,11 | 0,04744 | 0,442 | 204056_s_at  | Mevalonate kinase (mevalonic aciduria)                                        | MVK         |
| 3321  | 8,18     | 9,07    | -1,11 | 0,02359 | 0,388 | 1563842_at   | Phosphatidylinositol glycan anchor biosynthesis, class G                      | PIGG        |
| 1600  | 5,35     | 5,93    | -1,11 | 0,00998 | 0,341 | 220908_at    | Coiled-coil domain containing 33                                              | CCDC33      |
| 983   | 3,29     | 3,64    | -1,11 | 0,00569 | 0,315 | 244240_at    | -                                                                             | -           |
| 935   | 6,09     | 6,75    | -1,11 | 0,00536 | 0,313 | 236320_at    | Coiled-coil domain containing 17                                              | CCDC17      |
| 3993  | 6,68     | 7,40    | -1,11 | 0,02920 | 0,400 | 1562641_at   | Family with sequence similarity 122C                                          | FAM122C     |
| 2695  | 98,5     | 109     | -1,11 | 0,01848 | 0,375 | 1556507_at   | cDNA clone IMAGE:5267328                                                      | -           |
| 3891  | 11,5     | 12,8    | -1,11 | 0,02844 | 0,399 | 240744_at    | Carboxypeptidase A5                                                           | CPA5        |
| 2505  | 30,4     | 33,7    | -1,11 | 0,01685 | 0,367 | 221180_at    | Yeast Sps1/Ste20-related kinase 4 (S. cerevisiae)                             | YSK4        |
| 3920  | 16,5     | 18,3    | -1,11 | 0,02863 | 0,399 | 1559402_a_at | Chromosome 1 open reading frame 61                                            | C1orf61     |
| 1983  | 19,1     | 21,2    | -1,11 | 0,01295 | 0,355 | 227090_at    | PHD finger protein 21A                                                        | PHF21A      |
| 3569  | 10,5     | 11,6    | -1,11 | 0,02577 | 0,394 | 207187_at    | Janus kinase 3 (a protein tyrosine kinase, leukocyte)                         | JAK3        |
| 2136  | 61,2     | 67,8    | -1,11 | 0,01404 | 0,359 | 31861_at     | Immunoglobulin mu binding protein 2                                           | IGHMBP2     |
| 5183  | 5,00     | 5,54    | -1,11 | 0,03995 | 0,421 | 1554940_a_at | Hypothetical LOC388882                                                        | LOC388882   |
| 3320  | 5,80     | 6,43    | -1,11 | 0,02359 | 0,388 | 1552917_at   | Interleukin 29 (Interferon, lambda 1)                                         | IL29        |
| 5653  | 14,4     | 16,0    | -1,11 | 0,04510 | 0,436 | 1562434_at   | Unkempt homolog (Drosophila)                                                  | UNK         |
| 3839  | 8,31     | 9,21    | -1,11 | 0,02804 | 0,399 | 1562674_at   | Clone IMAGE:5165176, mRNA                                                     | -           |
| 3407  | 3,96     | 4,39    | -1,11 | 0,02430 | 0,390 | 215409_at    | 1-acylglycerol-3-phosphate O-acyltransferase 7 (lysophosphatidic acid acyltra | AGPAT7      |
| 4009  | 6,30     | 6,98    | -1,11 | 0,02934 | 0,400 | 242535_at    | Transcribed locus                                                             | -           |
| 2256  | 8,02     | 8,89    | -1,11 | 0,01502 | 0,363 | 206913_at    | Bile acid Coenzyme A: amino acid N-acyltransferase                            | BAAT        |
| 2722  | 5,84     | 6,47    | -1,11 | 0,01871 | 0,376 | 238321_at    | TEA domain family member 2                                                    | TEAD2       |
| 1608  | 4,87     | 5,40    | -1,11 | 0,01007 | 0,342 | 1556999_at   | Hypothetical protein LOC285045                                                | LOC285045   |
| 4041  | 6,63     | 7,35    | -1,11 | 0,02962 | 0,401 | 234534_at    | cDNA FLJ20100 fis, clone COL04648                                             | -           |

| Index | Mutated* | Normal* | FC    | P value | FDR** | Probe set    | Description                                                    | Gene symbol      |
|-------|----------|---------|-------|---------|-------|--------------|----------------------------------------------------------------|------------------|
| 5796  | 7,09     | 7,85    | -1,11 | 0,04675 | 0,441 | 240157_at    | Transcribed locus                                              | -                |
| 421   | 3,11     | 3,45    | -1,11 | 0,00221 | 0,286 | 234581_at    | cDNA FLJ21257 fis, clone COL01407                              | -                |
| 5091  | 10,4     | 11,5    | -1,11 | 0,03917 | 0,420 | 1552646_at   | Interleukin 11 receptor, alpha                                 | <i>IL11RA</i>    |
| 2885  | 8,54     | 9,46    | -1,11 | 0,02024 | 0,383 | 1567298_at   | Olfactory receptor, family 13, subfamily C, member 4           | <i>OR13C4</i>    |
| 1978  | 3,97     | 4,39    | -1,11 | 0,01292 | 0,355 | 233887_at    | G protein-coupled receptor 126                                 | <i>GPR126</i>    |
| 494   | 6,31     | 6,99    | -1,11 | 0,00264 | 0,289 | 230138_at    | Frequenin homolog (Drosophila)                                 | <i>FREQ</i>      |
| 3608  | 5,04     | 5,58    | -1,11 | 0,02603 | 0,394 | 223881_at    | Islet cell autoantigen 1,69kDa-like                            | <i>ICA1L</i>     |
| 1827  | 4,01     | 4,44    | -1,11 | 0,01177 | 0,351 | 1562384_at   | Chromosome 21 mRNA sequence                                    | -                |
| 2867  | 9,09     | 10,1    | -1,11 | 0,02011 | 0,383 | 219672_at    | Erythroid associated factor                                    | <i>ERAF</i>      |
| 5234  | 30,1     | 33,4    | -1,11 | 0,04050 | 0,423 | 216791_at    | Transmembrane protein 92                                       | <i>TMEM92</i>    |
| 3892  | 6,11     | 6,77    | -1,11 | 0,02844 | 0,399 | 217459_at    | cDNA DKFZp434L1016                                             | -                |
| 4203  | 25,5     | 28,3    | -1,11 | 0,03108 | 0,404 | 214444_s_at  | Poliovirus receptor                                            | <i>PVR</i>       |
| 2289  | 6,62     | 7,33    | -1,11 | 0,01521 | 0,363 | 206844_at    | Fructose-1,6-bisphosphatase 2                                  | <i>FBP2</i>      |
| 3414  | 12,0     | 13,2    | -1,11 | 0,02437 | 0,390 | 215875_at    | cDNA FLJ23167 fis, clone LNG09902                              | -                |
| 5000  | 18,6     | 20,6    | -1,11 | 0,03839 | 0,420 | 217033_x_at  | Neurotrophic tyrosine kinase, receptor, type 3                 | <i>NTRK3</i>     |
| 3997  | 15,7     | 17,4    | -1,11 | 0,02927 | 0,400 | 237736_at    | Transcribed locus                                              | -                |
| 1061  | 31,3     | 34,7    | -1,11 | 0,00623 | 0,319 | 202523_s_at  | SPARC/osteonectin, CWCV, and Kazal-like domains proteoglycan 2 | <i>SPOCK2</i>    |
| 4310  | 4,82     | 5,34    | -1,11 | 0,03209 | 0,407 | 232920_at    | Hypothetical LOC550631                                         | <i>LOC550631</i> |
| 3294  | 6,09     | 6,75    | -1,11 | 0,02345 | 0,388 | 1555051_at   | Chromosome 10 open reading frame 53                            | <i>C10orf53</i>  |
| 1689  | 5,32     | 5,89    | -1,11 | 0,01067 | 0,345 | 241046_at    | Transcribed locus                                              | -                |
| 1775  | 11,5     | 12,7    | -1,11 | 0,01130 | 0,348 | 206455_s_at  | Rhodopsin (opsin 2, rod pigment)                               | <i>RHO</i>       |
| 4782  | 14,5     | 16,0    | -1,11 | 0,03627 | 0,414 | 1555343_at   | Multiple EGF-like-domains 10                                   | <i>MEGF10</i>    |
| 2697  | 5,00     | 5,54    | -1,11 | 0,01850 | 0,375 | 233752_s_at  | Zinc finger homeobox 3                                         | <i>ZFHX3</i>     |
| 736   | 18,4     | 20,4    | -1,11 | 0,00420 | 0,308 | 1561171_a_at | FLJ40198 protein                                               | <i>FLJ36131</i>  |
| 3457  | 5,19     | 5,74    | -1,11 | 0,02477 | 0,392 | 241013_at    | Family with sequence similarity 124A                           | <i>FAM124A</i>   |
| 3144  | 6,61     | 7,32    | -1,11 | 0,02231 | 0,387 | 215476_at    | Clone 23726 mRNA sequence                                      | -                |
| 2200  | 4,32     | 4,79    | -1,11 | 0,01454 | 0,361 | 214576_at    | Keratin 36                                                     | <i>KRT36</i>     |
| 4984  | 13,5     | 15,0    | -1,11 | 0,03825 | 0,419 | 230253_at    | Signal peptide, CUB domain, EGF-like 3                         | <i>SCUBE3</i>    |
| 1155  | 7,25     | 8,03    | -1,11 | 0,00678 | 0,321 | 239327_at    | Transcribed locus                                              | -                |
| 4953  | 9,92     | 11,0    | -1,11 | 0,03799 | 0,419 | 1566484_at   | cDNA DKFZp666K2010                                             | -                |
| 4349  | 5,40     | 5,98    | -1,11 | 0,03239 | 0,407 | 216779_at    | Cylicin, basic protein of sperm head cytoskeleton 1            | <i>CYLC1</i>     |
| 1326  | 4,34     | 4,80    | -1,11 | 0,00798 | 0,328 | 1556645_s_at | Clone IMAGE:6016214, mRNA                                      | -                |
| 1113  | 6,59     | 7,29    | -1,11 | 0,00651 | 0,319 | 234206_at    | cDNA FLJ21271 fis, clone COL01751                              | -                |
| 1619  | 6,15     | 6,81    | -1,11 | 0,01017 | 0,343 | 1556914_at   | cDNA clone IMAGE:4838482                                       | -                |
| 5806  | 5,43     | 6,01    | -1,11 | 0,04686 | 0,441 | 206454_s_at  | Rhodopsin (opsin 2, rod pigment)                               | <i>RHO</i>       |
| 3982  | 3,47     | 3,84    | -1,11 | 0,02913 | 0,400 | 1566140_at   | Homeodomain-only protein                                       | <i>HOP</i>       |
| 1722  | 4,40     | 4,87    | -1,11 | 0,01103 | 0,348 | 240722_at    | Transcribed locus                                              | -                |
| 5180  | 36,1     | 40,0    | -1,11 | 0,03993 | 0,421 | 36888_at     | KIAA0841 protein                                               | <i>KIAA0841</i>  |
| 2261  | 5,27     | 5,84    | -1,11 | 0,01505 | 0,363 | 230975_at    | Transcribed locus                                              | -                |
| 3894  | 7,74     | 8,56    | -1,11 | 0,02845 | 0,399 | 207969_x_at  | Acrosomal vesicle protein 1                                    | <i>ACRV1</i>     |
| 3915  | 3,52     | 3,89    | -1,11 | 0,02860 | 0,399 | 232562_at    | cDNA FLJ11554 fis, clone HEMBA1003037                          | -                |
| 564   | 5,21     | 5,77    | -1,11 | 0,00309 | 0,299 | 234027_at    | Coiled-coil domain containing 129                              | <i>CCDC129</i>   |
| 2434  | 6,26     | 6,93    | -1,11 | 0,01627 | 0,365 | 1559354_a_at | Full length insert cDNA YQ09C04                                | -                |
| 828   | 3,63     | 4,02    | -1,11 | 0,00472 | 0,312 | 1560298_at   | cDNA clone IMAGE:4814133                                       | -                |
| 4659  | 17,3     | 19,1    | -1,11 | 0,03518 | 0,413 | 206998_x_at  | Proline-rich protein BstNI subfamily 1                         | <i>PRB1</i>      |
| 3934  | 6,25     | 6,91    | -1,11 | 0,02874 | 0,399 | 1569219_at   | Clone IMAGE:4655360, mRNA                                      | -                |
| 2464  | 9,58     | 10,6    | -1,11 | 0,01654 | 0,367 | 214256_at    | ATPase, Class V, type 10A                                      | <i>ATP10A</i>    |
| 4059  | 9,55     | 10,6    | -1,11 | 0,02978 | 0,401 | 1562239_at   | Small G protein signaling modulator 1                          | <i>SGSM1</i>     |
| 5001  | 16,7     | 18,4    | -1,11 | 0,03840 | 0,420 | 208277_at    | Paired-like homeodomain 3                                      | <i>PITX3</i>     |
| 1706  | 13,4     | 14,8    | -1,11 | 0,01089 | 0,348 | 220045_at    | Neurogenic differentiation 6                                   | <i>NEUROD6</i>   |
| 2320  | 3,80     | 4,20    | -1,11 | 0,01541 | 0,363 | 230478_at    | Oncoprotein induced transcript 3                               | <i>OIT3</i>      |
| 2758  | 5,94     | 6,57    | -1,11 | 0,01914 | 0,379 | 243322_at    | Transcribed locus                                              | -                |
| 2911  | 13,1     | 14,5    | -1,11 | 0,02045 | 0,383 | 1566994_at   | Clone GCRG114 mRNA sequence                                    | -                |
| 5753  | 8,31     | 9,19    | -1,11 | 0,04618 | 0,439 | 1562681_at   | Keratin associated protein 5-2                                 | <i>KRTAP5-2</i>  |
| 524   | 3,42     | 3,79    | -1,11 | 0,00279 | 0,291 | 234852_at    | Hypothetical protein LOC648859                                 | <i>LOC648859</i> |
| 4010  | 5,53     | 6,12    | -1,11 | 0,02936 | 0,400 | 236148_at    | Full length insert cDNA clone YA80A03                          | -                |
| 3140  | 6,14     | 6,79    | -1,11 | 0,02227 | 0,387 | 243079_x_at  | Transcribed locus                                              | -                |

| Index | Mutated* | Normal* | FC    | P value | FDR** | Probe set    | Description                                                   | Gene symbol      |
|-------|----------|---------|-------|---------|-------|--------------|---------------------------------------------------------------|------------------|
| 1178  | 5,96     | 6,59    | -1,11 | 0,00692 | 0,321 | 236127_at    | Transcribed locus                                             | -                |
| 2793  | 4,90     | 5,42    | -1,11 | 0,01941 | 0,380 | 236291_at    | Retinol dehydrogenase 5 (11-cis/9-cis)                        | <i>RDH5</i>      |
| 2862  | 12,9     | 14,3    | -1,11 | 0,02010 | 0,383 | 234356_at    | cDNA DKFZP434K028                                             | -                |
| 2900  | 7,70     | 8,52    | -1,11 | 0,02036 | 0,383 | 232863_at    | Zinc finger protein 815                                       | <i>ZNF815</i>    |
| 4013  | 6,55     | 7,24    | -1,11 | 0,02939 | 0,400 | 1560149_at   | Solute carrier family 29, member 2                            | <i>SLC29A2</i>   |
| 4768  | 19,1     | 21,1    | -1,11 | 0,03614 | 0,414 | 237378_at    | FLJ46321 protein                                              | <i>FLJ46321</i>  |
| 3922  | 5,99     | 6,62    | -1,11 | 0,02864 | 0,399 | 237765_at    | Chromosome 14 open reading frame 68                           | <i>C14orf68</i>  |
| 4099  | 6,13     | 6,78    | -1,11 | 0,03013 | 0,402 | 231611_at    | Similar to XP_001104477.1                                     | -                |
| 2030  | 4,75     | 5,25    | -1,11 | 0,01323 | 0,355 | 236343_at    | Transcribed locus                                             | -                |
| 1964  | 8,04     | 8,89    | -1,11 | 0,01284 | 0,355 | 206812_at    | Adrenergic, beta-3-, receptor                                 | <i>ADRB3</i>     |
| 170   | 3,25     | 3,59    | -1,11 | 0,00079 | 0,244 | 236618_at    | Chromosome 20 open reading frame 132                          | <i>C20orf132</i> |
| 5148  | 4,04     | 4,47    | -1,11 | 0,03964 | 0,421 | 242723_at    | Transcribed locus                                             | -                |
| 5358  | 9,15     | 10,1    | -1,11 | 0,04201 | 0,429 | 241053_at    | Hypothetical protein LOC730184                                | <i>LOC730184</i> |
| 2865  | 5,33     | 5,89    | -1,11 | 0,02011 | 0,383 | 206775_at    | Cubilin (intrinsic factor-cobalamin receptor)                 | <i>CUBN</i>      |
| 459   | 2,95     | 3,26    | -1,11 | 0,00245 | 0,288 | 237514_at    | cDNA clone IMAGE:5267328                                      | -                |
| 1220  | 3,30     | 3,65    | -1,11 | 0,00726 | 0,324 | 1560284_at   | cDNA clone IMAGE:5271145                                      | -                |
| 1148  | 18,6     | 20,6    | -1,11 | 0,00675 | 0,321 | 230157_at    | Cadherin-like 24                                              | <i>CDH24</i>     |
| 190   | 2,89     | 3,20    | -1,11 | 0,00088 | 0,244 | 206676_at    | Carcinoembryonic antigen-related cell adhesion molecule 8     | <i>CEACAM8</i>   |
| 1129  | 3,76     | 4,15    | -1,11 | 0,00659 | 0,319 | 224209_s_at  | Guanine deaminase                                             | <i>GDA</i>       |
| 2118  | 5,70     | 6,30    | -1,11 | 0,01389 | 0,359 | 1554974_at   | Aspartoacylase (aminocyclase) 3                               | <i>ACY3</i>      |
| 3588  | 11,0     | 12,2    | -1,11 | 0,02589 | 0,394 | 242848_x_at  | Transcribed locus                                             | -                |
| 2093  | 4,57     | 5,05    | -1,11 | 0,01367 | 0,357 | 1562327_at   | cDNA clone IMAGE:4794893                                      | -                |
| 3758  | 6,10     | 6,74    | -1,11 | 0,02731 | 0,397 | 1566232_at   | cDNA DKFZp667I0318                                            | -                |
| 4585  | 5,00     | 5,52    | -1,11 | 0,03465 | 0,412 | 230859_at    | Transcribed locus                                             | -                |
| 3813  | 13,2     | 14,6    | -1,11 | 0,02779 | 0,398 | 208034_s_at  | Protein Z, vitamin K-dependent plasma glycoProtein            | <i>PROZ</i>      |
| 767   | 14,3     | 15,8    | -1,11 | 0,00437 | 0,311 | 1554580_a_at | WW domain containing E3 ubiquitin protein ligase 2            | <i>WWP2</i>      |
| 1528  | 3,09     | 3,41    | -1,11 | 0,00945 | 0,337 | 1568755_a_at | cDNA clone IMAGE:5267015                                      | -                |
| 669   | 3,68     | 4,06    | -1,11 | 0,00384 | 0,308 | 1560895_at   | Hypothetical LOC645188                                        | <i>LOC645188</i> |
| 761   | 5,07     | 5,60    | -1,11 | 0,00430 | 0,308 | 224539_s_at  | Protocadherin alpha subfamily C, 2                            | <i>PCDHAC2</i>   |
| 3609  | 57,3     | 63,3    | -1,11 | 0,02605 | 0,394 | 1553359_at   | F-box and leucine-rich repeat protein 18                      | <i>FBXL18</i>    |
| 1612  | 3,69     | 4,08    | -1,11 | 0,01010 | 0,343 | 231642_at    | Chromosome 6 open reading frame 201                           | <i>C6orf201</i>  |
| 3219  | 7,36     | 8,13    | -1,11 | 0,02281 | 0,387 | 220776_at    | Potassium inwardly-rectifying channel, subfamily J, member 14 | <i>KCNJ14</i>    |
| 4861  | 12,3     | 13,6    | -1,10 | 0,03709 | 0,417 | 244711_at    | Transcribed locus                                             | -                |
| 4497  | 6,89     | 7,62    | -1,10 | 0,03383 | 0,411 | 207316_at    | Hyaluronan synthase 1                                         | <i>HAS1</i>      |
| 3983  | 4,06     | 4,48    | -1,10 | 0,02914 | 0,400 | 1559033_at   | Hypothetical protein LOC255167                                | <i>LOC255167</i> |
| 4369  | 4,25     | 4,69    | -1,10 | 0,03251 | 0,407 | 1561693_at   | Hypothetical gene supported by BC030596                       | <i>LOC400794</i> |
| 1986  | 12,6     | 13,9    | -1,10 | 0,01297 | 0,355 | 232880_at    | cDNA DKFZp434E145                                             | -                |
| 1536  | 4,55     | 5,03    | -1,10 | 0,00951 | 0,337 | 240534_at    | Transcribed locus                                             | -                |
| 5937  | 23,4     | 25,9    | -1,10 | 0,04814 | 0,443 | 1553572_a_at | Cytoglobin                                                    | <i>CYGB</i>      |
| 2986  | 3,34     | 3,69    | -1,10 | 0,02100 | 0,384 | 237268_at    | Down syndrome cell adhesion molecule                          | <i>DSCAM</i>     |
| 5147  | 12,4     | 13,7    | -1,10 | 0,03962 | 0,421 | 216145_at    | Velo-cardio-facial syndrome 22q11 region mRNA sequence        | -                |
| 3176  | 24,4     | 27,0    | -1,10 | 0,02253 | 0,387 | 1556722_a_at | Hypothetical protein FLJ33706                                 | <i>FLJ33706</i>  |
| 5588  | 17,7     | 19,6    | -1,10 | 0,04457 | 0,436 | 1553656_at   | Tectorin beta                                                 | <i>TECTB</i>     |
| 4791  | 5,98     | 6,60    | -1,10 | 0,03633 | 0,415 | 207072_at    | Interleukin 18 receptor accessory protein                     | <i>IL18RAP</i>   |
| 5451  | 8,30     | 9,17    | -1,10 | 0,04300 | 0,431 | 234768_at    | cDNA FLJ20865 fis, clone ADKA01850                            | -                |
| 1078  | 9,17     | 10,1    | -1,10 | 0,00632 | 0,319 | 207228_at    | Protein kinase, cAMP-dependent, catalytic, gamma              | <i>PRKACG</i>    |
| 1073  | 4,08     | 4,51    | -1,10 | 0,00629 | 0,319 | 243393_at    | Transcribed locus                                             | -                |
| 4418  | 20,6     | 22,7    | -1,10 | 0,03306 | 0,409 | 208568_at    | Melanocortin 2 receptor (adrenocorticotrophic hormone)        | <i>MC2R</i>      |
| 2863  | 5,87     | 6,48    | -1,10 | 0,02010 | 0,383 | 210632_s_at  | Sarcoglycan, alpha (50kDa dystrophin-associated glycoprotein) | <i>SGCA</i>      |
| 4024  | 10,5     | 11,6    | -1,10 | 0,02946 | 0,400 | 1569461_at   | -                                                             | -                |
| 3959  | 3,15     | 3,47    | -1,10 | 0,02891 | 0,399 | 206177_s_at  | Arginase, liver                                               | <i>ARG1</i>      |
| 1917  | 3,71     | 4,09    | -1,10 | 0,01251 | 0,355 | 244091_at    | Transcribed locus                                             | -                |
| 1492  | 3,79     | 4,18    | -1,10 | 0,00919 | 0,336 | 231122_x_at  | Zinc finger, DHHC-type containing 19                          | <i>ZDHHC19</i>   |
| 5862  | 24,7     | 27,3    | -1,10 | 0,04740 | 0,442 | 206817_x_at  | Trinucleotide repeat containing 4                             | <i>TNRC4</i>     |
| 1737  | 5,28     | 5,83    | -1,10 | 0,01110 | 0,348 | 236052_at    | Hypothetical LOC388610                                        | <i>LOC388610</i> |
| 3574  | 4,06     | 4,48    | -1,10 | 0,02581 | 0,394 | 216015_s_at  | NLR family, pyrin domain containing 3                         | <i>NLRP3</i>     |
| 4007  | 4,99     | 5,51    | -1,10 | 0,02932 | 0,400 | 206465_at    | Acyl-CoA synthetase bubblegum family member 1                 | <i>ACSBG1</i>    |

| Index | Mutated* | Normal* | FC    | P value | FDR** | Probe set    | Description                                                    | Gene symbol      |
|-------|----------|---------|-------|---------|-------|--------------|----------------------------------------------------------------|------------------|
| 3286  | 4,27     | 4,72    | -1,10 | 0,02341 | 0,388 | 1556641_at   | Hypothetical protein FLJ37228                                  | <i>FLJ37228</i>  |
| 3621  | 12,5     | 13,8    | -1,10 | 0,02614 | 0,395 | 237266_at    | Similar to Kv channel interacting protein 2 isoform 4          | -                |
| 4963  | 5,29     | 5,84    | -1,10 | 0,03807 | 0,419 | 230693_at    | ATPase, Ca++ transporting, cardiac muscle, fast twitch 1       | <i>ATP2A1</i>    |
| 1824  | 3,25     | 3,59    | -1,10 | 0,01176 | 0,351 | 1561278_at   | cDNA clone IMAGE:4829538                                       | -                |
| 5121  | 9,66     | 10,7    | -1,10 | 0,03942 | 0,421 | 233623_at    | Clone FLB3107 mRNA sequence                                    | -                |
| 2446  | 8,72     | 9,63    | -1,10 | 0,01637 | 0,366 | 1568734_a_at | HCLS1 binding protein 3                                        | <i>HS1BP3</i>    |
| 4149  | 4,20     | 4,63    | -1,10 | 0,03061 | 0,403 | 220064_at    | Tetratricopeptide repeat domain 21B                            | <i>TTC21B</i>    |
| 3352  | 5,56     | 6,14    | -1,10 | 0,02380 | 0,388 | 221097_s_at  | Calcium-activated potassium channel subunit beta-2             | <i>KCNMB2</i>    |
| 3274  | 5,44     | 6,00    | -1,10 | 0,02329 | 0,388 | 1553555_at   | Taste receptor, type 2, member 38                              | <i>TAS2R38</i>   |
| 3474  | 7,21     | 7,96    | -1,10 | 0,02493 | 0,392 | 243769_at    | -                                                              | -                |
| 3479  | 19,3     | 21,3    | -1,10 | 0,02498 | 0,392 | 207205_at    | Carcinoembryonic antigen-related cell adhesion molecule 4      | <i>CEACAM4</i>   |
| 3146  | 114      | 126     | -1,10 | 0,02232 | 0,387 | 229356_x_at  | INO80 complex homolog 1 (S. cerevisiae)                        | <i>INOC1</i>     |
| 3873  | 6,86     | 7,57    | -1,10 | 0,02829 | 0,399 | 207421_at    | Carbonic anhydrase VA, mitochondrial                           | <i>CASA</i>      |
| 4987  | 9,62     | 10,6    | -1,10 | 0,03827 | 0,419 | 1553900_s_at | POM121-like protein                                            | -                |
| 2572  | 15,1     | 16,7    | -1,10 | 0,01744 | 0,371 | 229561_at    | Chromosome 14 open reading frame 121                           | <i>C14orf121</i> |
| 4940  | 4,23     | 4,67    | -1,10 | 0,03791 | 0,419 | 216085_at    | cDNA DKFZP434C153                                              | -                |
| 844   | 3,88     | 4,28    | -1,10 | 0,00484 | 0,313 | 1553059_at   | Peptidoglycan recognition protein 3                            | <i>PGLYRP3</i>   |
| 5107  | 11,3     | 12,5    | -1,10 | 0,03929 | 0,421 | 234586_at    | Sarcosine dehydrogenase                                        | <i>SARDH</i>     |
| 4647  | 10,3     | 11,4    | -1,10 | 0,03505 | 0,412 | 1555550_at   | ligand-gated ion channel, zinc activated 1                     | <i>LGICZ1</i>    |
| 4320  | 4,57     | 5,04    | -1,10 | 0,03216 | 0,407 | 223372_at    | Dnaj (Hsp40) homolog, subfamily C, member 4                    | <i>DNAJC4</i>    |
| 2737  | 5,66     | 6,25    | -1,10 | 0,01889 | 0,377 | 236151_at    | KIAA1853 protein                                               | <i>KIAA1853</i>  |
| 5737  | 10,5     | 11,6    | -1,10 | 0,04601 | 0,438 | 210155_at    | Myocilin                                                       | <i>MYOC</i>      |
| 4375  | 17,3     | 19,1    | -1,10 | 0,03256 | 0,407 | 241800_x_at  | -                                                              | -                |
| 5453  | 33,2     | 36,6    | -1,10 | 0,04302 | 0,431 | 206901_at    | Chromosome 19 open reading frame 57                            | <i>C19orf57</i>  |
| 4353  | 5,06     | 5,58    | -1,10 | 0,03241 | 0,407 | 211132_at    | -                                                              | -                |
| 5037  | 4,68     | 5,17    | -1,10 | 0,03880 | 0,420 | 240611_at    | -                                                              | -                |
| 4700  | 13,9     | 15,3    | -1,10 | 0,03549 | 0,413 | 1554613_a_at | KIAA0226 protein                                               | <i>KIAA0226</i>  |
| 5263  | 6,00     | 6,62    | -1,10 | 0,04089 | 0,425 | 233368_s_at  | RAB and Dnaj domain containing                                 | <i>RBJ</i>       |
| 4457  | 22,7     | 25,0    | -1,10 | 0,03348 | 0,411 | 237401_at    | Actinin, alpha 1                                               | <i>ACTN1</i>     |
| 3773  | 8,60     | 9,49    | -1,10 | 0,02741 | 0,397 | 1559426_at   | cDNA FLJ39210 fis, clone OCBBF2006154                          | -                |
| 2792  | 5,78     | 6,38    | -1,10 | 0,01941 | 0,380 | 231998_at    | -                                                              | -                |
| 5377  | 20,1     | 22,2    | -1,10 | 0,04217 | 0,429 | 206883_x_at  | Glycoprotein IX (platelet)                                     | <i>GP9</i>       |
| 2084  | 3,81     | 4,21    | -1,10 | 0,01360 | 0,356 | 241197_at    | Transcribed locus                                              | -                |
| 4314  | 11,4     | 12,6    | -1,10 | 0,03211 | 0,407 | 207770_x_at  | Chorionic somatomammotropin hormone 2                          | <i>CSH2</i>      |
| 4223  | 21,6     | 23,8    | -1,10 | 0,03129 | 0,405 | 1554749_s_at | Chloride channel Kb                                            | <i>CLCNKB</i>    |
| 2224  | 3,15     | 3,47    | -1,10 | 0,01477 | 0,363 | 243923_at    | Similar to XP_529637.1                                         | -                |
| 3358  | 4,82     | 5,31    | -1,10 | 0,02384 | 0,388 | 220381_at    | Rho GTPase activating protein 28                               | <i>ARHGAP28</i>  |
| 5998  | 8,00     | 8,82    | -1,10 | 0,04877 | 0,444 | 243891_at    | Transcribed locus                                              | -                |
| 4504  | 12,3     | 13,5    | -1,10 | 0,03390 | 0,412 | 214750_at    | Placenta-specific 4                                            | <i>PLAC4</i>     |
| 5683  | 15,5     | 17,1    | -1,10 | 0,04537 | 0,436 | 244580_at    | Clone IMAGE:4871993, mRNA                                      | -                |
| 1114  | 3,41     | 3,76    | -1,10 | 0,00652 | 0,319 | 233043_at    | Hypothetical protein LOC221814                                 | <i>LOC221814</i> |
| 2715  | 3,76     | 4,15    | -1,10 | 0,01865 | 0,376 | 240953_at    | Transcribed locus                                              | -                |
| 5361  | 3,65     | 4,02    | -1,10 | 0,04205 | 0,429 | 235960_at    | Full length insert cDNA YI38B04                                | -                |
| 4364  | 4,03     | 4,44    | -1,10 | 0,03245 | 0,407 | 1569782_at   | cDNA clone IMAGE:5259303                                       | -                |
| 185   | 2,71     | 2,99    | -1,10 | 0,00086 | 0,244 | 1560174_at   | Sperm associated antigen 16                                    | <i>SPAG16</i>    |
| 5178  | 9,20     | 10,1    | -1,10 | 0,03990 | 0,421 | 1563228_x_at | Hypothetical protein MGC15523                                  | <i>MGC15523</i>  |
| 5923  | 5,11     | 5,63    | -1,10 | 0,04799 | 0,443 | 1562099_at   | cDNA clone IMAGE:5425336                                       | -                |
| 4557  | 11,0     | 12,2    | -1,10 | 0,03445 | 0,412 | 221382_at    | -                                                              | -                |
| 2418  | 5,31     | 5,86    | -1,10 | 0,01617 | 0,365 | 1557369_a_at | Hypothetical protein LOC285401                                 | <i>LOC285401</i> |
| 4355  | 4,83     | 5,33    | -1,10 | 0,03241 | 0,407 | 207636_at    | Serpin peptidase inhibitor, clade I (pancpin), member 2        | <i>SERPINI2</i>  |
| 3869  | 4,77     | 5,26    | -1,10 | 0,02826 | 0,399 | 234526_at    | Olfactory receptor, family 51, subfamily B, member 6           | <i>OR51B6</i>    |
| 1034  | 3,63     | 4,00    | -1,10 | 0,00601 | 0,318 | 1566277_at   | Olfactory receptor, family 5, subfamily E, member 1 pseudogene | <i>OR5E1P</i>    |
| 3533  | 4,94     | 5,45    | -1,10 | 0,02540 | 0,393 | 234460_at    | -                                                              | -                |
| 6059  | 33,9     | 37,4    | -1,10 | 0,04941 | 0,446 | 226173_at    | TBC1 domain family, member 25                                  | <i>TBC1D25</i>   |
| 1334  | 3,47     | 3,83    | -1,10 | 0,00801 | 0,328 | 1562163_at   | Full length insert cDNA clone YR43F03                          | -                |
| 4274  | 5,74     | 6,33    | -1,10 | 0,03177 | 0,406 | 223935_at    | Long transient receptor potential channel 5                    | <i>TRPM5</i>     |
| 4433  | 6,67     | 7,35    | -1,10 | 0,03321 | 0,409 | 237434_x_at  | Hypothetical gene supported by BC043530                        | <i>LOC345222</i> |

| Index | Mutated* | Normal* | FC    | P value | FDR** | Probe set    | Description                                                        | Gene symbol      |
|-------|----------|---------|-------|---------|-------|--------------|--------------------------------------------------------------------|------------------|
| 4233  | 3,30     | 3,64    | -1,10 | 0,03138 | 0,405 | 235178_x_at  | Establishment of cohesion 1 homolog 2 ( <i>S. cerevisiae</i> )     | <i>ESCO2</i>     |
| 2609  | 5,69     | 6,27    | -1,10 | 0,01772 | 0,371 | 237089_at    | -                                                                  | -                |
| 4935  | 5,43     | 5,99    | -1,10 | 0,03786 | 0,419 | 231756_at    | Zona pellucida glycoprotein 4                                      | <i>ZP4</i>       |
| 1485  | 5,98     | 6,59    | -1,10 | 0,00912 | 0,336 | 202482_x_at  | RAN binding protein 1                                              | <i>RANBP1</i>    |
| 3563  | 4,15     | 4,58    | -1,10 | 0,02570 | 0,394 | 1555368_x_at | Zinc finger protein 479                                            | <i>ZNF479</i>    |
| 5365  | 8,10     | 8,93    | -1,10 | 0,04211 | 0,429 | 1557258_a_at | B-cell CLL/lymphoma 10                                             | <i>BCL10</i>     |
| 3708  | 6,34     | 6,98    | -1,10 | 0,02681 | 0,395 | 238275_at    | Huntingtin-associated protein 1 (neuroan 1)                        | <i>HAP1</i>      |
| 1918  | 4,83     | 5,32    | -1,10 | 0,01251 | 0,355 | 236056_s_at  | Membrane-associated ring finger (C3HC4) 8                          | -                |
| 5976  | 20,5     | 22,6    | -1,10 | 0,04854 | 0,444 | 222960_at    | Calcium channel, voltage-dependent, T type, alpha 1H subunit       | <i>CACNA1H</i>   |
| 2411  | 5,28     | 5,82    | -1,10 | 0,01610 | 0,365 | 1562549_at   | cDNA clone IMAGE:5270889                                           | -                |
| 2768  | 4,27     | 4,71    | -1,10 | 0,01921 | 0,379 | 231685_at    | -                                                                  | -                |
| 2940  | 6,86     | 7,57    | -1,10 | 0,02062 | 0,383 | 234441_at    | cDNA DKFZp434F1872                                                 | -                |
| 4438  | 5,59     | 6,17    | -1,10 | 0,03324 | 0,410 | 206484_s_at  | X-prolyl aminopeptidase (aminopeptidase P) 2, membrane-bound       | <i>XPNPEP2</i>   |
| 2623  | 4,06     | 4,48    | -1,10 | 0,01782 | 0,371 | 238691_at    | Small nucleolar RNA host gene (non-protein coding) 10              | <i>SNHG10</i>    |
| 4997  | 5,25     | 5,78    | -1,10 | 0,03837 | 0,420 | 234530_s_at  | Chromosome 6 open reading frame 12                                 | <i>C6orf12</i>   |
| 5920  | 6,42     | 7,07    | -1,10 | 0,04798 | 0,443 | 216175_at    | cDNA FLJ21623 fis, clone COL07915                                  | -                |
| 1087  | 8,40     | 9,26    | -1,10 | 0,00637 | 0,319 | 1557660_s_at | Hypothetical protein LOC728883                                     | <i>LOC728883</i> |
| 2672  | 97,3     | 107     | -1,10 | 0,01827 | 0,374 | 224429_x_at  | Pseudogene MGC10997                                                | <i>MGC10997</i>  |
| 5054  | 8,99     | 9,90    | -1,10 | 0,03893 | 0,420 | 244652_at    | Transcribed locus                                                  | -                |
| 4406  | 23,1     | 25,4    | -1,10 | 0,03288 | 0,408 | 206047_at    | Guanine nucleotide binding protein (G protein), beta polypeptide 3 | <i>GNB3</i>      |
| 4732  | 5,61     | 6,18    | -1,10 | 0,03583 | 0,414 | 229048_at    | Full length insert cDNA clone ZD86A03                              | -                |
| 2704  | 8,22     | 9,06    | -1,10 | 0,01854 | 0,375 | 242632_at    | FYVE, RhoGEF and PH domain containing 2                            | <i>FGD2</i>      |
| 5962  | 17,5     | 19,3    | -1,10 | 0,04841 | 0,444 | 240393_at    | Transcribed locus                                                  | -                |
| 4189  | 21,5     | 23,7    | -1,10 | 0,03096 | 0,404 | 1553839_at   | cDNA DKFZp761B107                                                  | -                |
| 2917  | 4,05     | 4,46    | -1,10 | 0,02048 | 0,383 | 221361_at    | Olfactory marker protein                                           | <i>OMP</i>       |
| 5449  | 50,0     | 55,1    | -1,10 | 0,04298 | 0,431 | 1560439_at   | HCG2040376 protein                                                 | -                |
| 5794  | 13,2     | 14,6    | -1,10 | 0,04674 | 0,441 | 1558590_at   | Methyltransferase 11 domain containing 1                           | <i>METT11D1</i>  |
| 4974  | 21,5     | 23,7    | -1,10 | 0,03816 | 0,419 | 227142_at    | Pleckstrin homology domain containing family G member 5            | <i>PLEKHG5</i>   |
| 4687  | 4,51     | 4,97    | -1,10 | 0,03538 | 0,413 | 1554537_at   | Transmembrane protein 126B                                         | <i>TMEM126B</i>  |
| 5748  | 4,87     | 5,36    | -1,10 | 0,04612 | 0,439 | 1570138_at   | Clone IMAGE:5115854, mRNA                                          | -                |
| 947   | 4,21     | 4,63    | -1,10 | 0,00543 | 0,313 | 1561389_at   | cDNA clone IMAGE:4825217                                           | -                |
| 4506  | 5,52     | 6,08    | -1,10 | 0,03393 | 0,412 | 207662_at    | T-box 1                                                            | <i>TBX1</i>      |
| 3726  | 5,87     | 6,46    | -1,10 | 0,02705 | 0,397 | 231126_at    | Hypothetical protein LOC339778                                     | <i>LOC339778</i> |
| 4712  | 5,51     | 6,07    | -1,10 | 0,03565 | 0,413 | 1563608_a_at | Potassium channel, subfamily T, member 1                           | <i>KCNT1</i>     |
| 4901  | 4,60     | 5,07    | -1,10 | 0,03750 | 0,418 | 1566844_at   | Period 4 pseudogene                                                | <i>PER4</i>      |
| 4414  | 3,41     | 3,76    | -1,10 | 0,03300 | 0,409 | 1559633_a_at | Cholinergic receptor, muscarinic 3                                 | <i>CHRM3</i>     |
| 3362  | 26,2     | 28,9    | -1,10 | 0,02389 | 0,388 | 224243_at    | Apolipoprotein A-V                                                 | <i>APOA5</i>     |
| 3102  | 6,61     | 7,28    | -1,10 | 0,02191 | 0,386 | 1569911_at   | Clone IMAGE:3884408, mRNA                                          | -                |
| 4427  | 13,1     | 14,4    | -1,10 | 0,03316 | 0,409 | 210925_at    | Class II, major histocompatibility complex, transactivator         | <i>CIITA</i>     |
| 1972  | 8,04     | 8,86    | -1,10 | 0,01289 | 0,355 | 240455_at    | Transcribed locus                                                  | -                |
| 3301  | 5,05     | 5,56    | -1,10 | 0,02351 | 0,388 | 1566228_at   | cDNA clone IMAGE:2988896                                           | -                |
| 3845  | 9,03     | 9,95    | -1,10 | 0,02806 | 0,399 | 237643_at    | Transcribed locus                                                  | -                |
| 5841  | 55,2     | 60,8    | -1,10 | 0,04720 | 0,442 | 223617_x_at  | ATPase family, AAA domain containing 3B                            | <i>ATAD3B</i>    |
| 1314  | 5,73     | 6,31    | -1,10 | 0,00783 | 0,325 | 240671_at    | Full-length cDNA clone CSODM007YH16                                | -                |
| 4146  | 6,90     | 7,60    | -1,10 | 0,03060 | 0,403 | 214229_at    | Dynein, axonemal, heavy chain 17                                   | <i>DNAH17</i>    |
| 2531  | 4,39     | 4,84    | -1,10 | 0,01710 | 0,369 | 242459_at    | Transcribed locus                                                  | -                |
| 1070  | 3,26     | 3,58    | -1,10 | 0,00628 | 0,319 | 221146_at    | -                                                                  | -                |
| 4050  | 4,75     | 5,23    | -1,10 | 0,02968 | 0,401 | 210770_s_at  | Calcium channel, voltage-dependent, P/Q type, alpha 1A subunit     | <i>CACNA1A</i>   |
| 1637  | 4,05     | 4,46    | -1,10 | 0,01031 | 0,344 | 1555098_a_at | Calcium channel, voltage-dependent, beta 2 subunit                 | <i>CACNB2</i>    |
| 6080  | 5,86     | 6,45    | -1,10 | 0,04964 | 0,446 | 1558378_a_at | AHNAK nucleoprotein 2                                              | <i>AHNAK2</i>    |
| 362   | 3,16     | 3,48    | -1,10 | 0,00189 | 0,284 | 1568802_at   | Clone IMAGE:3912773, mRNA sequence                                 | -                |
| 5068  | 49,4     | 54,4    | -1,10 | 0,03901 | 0,420 | 1559638_at   | Chromosome 1 open reading frame 200                                | <i>C1orf200</i>  |
| 2719  | 4,52     | 4,98    | -1,10 | 0,01868 | 0,376 | 234121_at    | cDNA FLJ20486 fis, clone KAT08039                                  | -                |
| 3051  | 8,42     | 9,27    | -1,10 | 0,02147 | 0,385 | 237922_at    | Transcribed locus                                                  | -                |
| 3791  | 8,29     | 9,12    | -1,10 | 0,02761 | 0,398 | 1569268_at   | Glutamate receptor, ionotropic, N-methyl D-aspartate 2C            | <i>GRIN2C</i>    |
| 3363  | 6,16     | 6,78    | -1,10 | 0,02389 | 0,388 | 236566_at    | Transcribed locus                                                  | -                |
| 4256  | 5,23     | 5,76    | -1,10 | 0,03163 | 0,406 | 233178_at    | TGFB-induced factor homeobox 2-like, Y-linked                      | <i>TGIF2LY</i>   |

| Index | Mutated* | Normal* | FC    | P value | FDR** | Probe set    | Description                                                   | Gene symbol      |
|-------|----------|---------|-------|---------|-------|--------------|---------------------------------------------------------------|------------------|
| 3288  | 5,38     | 5,92    | -1,10 | 0,02342 | 0,388 | 1561785_at   | Mucin 4, cell surface associated                              | <i>MUC4</i>      |
| 5751  | 3,57     | 3,93    | -1,10 | 0,04615 | 0,439 | 1568634_a_at | Similar to Hypothetical protein MGC38937                      | <i>LOC339977</i> |
| 5132  | 7,58     | 8,34    | -1,10 | 0,03950 | 0,421 | 216492_at    | Killer cell immunoglobulin-like receptor, three domains, X1   | <i>KIR3DX1</i>   |
| 5085  | 8,80     | 9,68    | -1,10 | 0,03914 | 0,420 | 244833_at    | Coiled-coil domain containing 63                              | <i>CCDC63</i>    |
| 1230  | 3,86     | 4,25    | -1,10 | 0,00731 | 0,324 | 1569624_at   | Clone IMAGE:4248008, mRNA                                     | -                |
| 2087  | 3,52     | 3,88    | -1,10 | 0,01362 | 0,356 | 1556487_a_at | Chromosome 3 open reading frame 15                            | <i>C3orf15</i>   |
| 4298  | 34,1     | 37,5    | -1,10 | 0,03198 | 0,407 | 1568704_a_at | Calcium homeostasis endoplasmic reticulum protein             | <i>CHERP</i>     |
| 2974  | 3,13     | 3,45    | -1,10 | 0,02090 | 0,384 | 1561543_at   | cDNA clone IMAGE:5299981                                      | -                |
| 5182  | 18,7     | 20,6    | -1,10 | 0,03995 | 0,421 | 1559924_at   | cDNA clone IMAGE:5303182                                      | -                |
| 5525  | 12,0     | 13,2    | -1,10 | 0,04381 | 0,433 | 241939_at    | IQ motif containing GTPase activating protein 3               | <i>IQGAP3</i>    |
| 1474  | 6,99     | 7,69    | -1,10 | 0,00900 | 0,334 | 216759_at    | HRAS-like suppressor 2                                        | <i>HRASLS2</i>   |
| 1705  | 10,9     | 12,0    | -1,10 | 0,01088 | 0,348 | 1563090_at   | Coiled-coil domain containing 33                              | <i>CCDC33</i>    |
| 3070  | 3,67     | 4,04    | -1,10 | 0,02166 | 0,385 | 209816_at    | Patched homolog 1 (Drosophila)                                | <i>PTCH1</i>     |
| 3077  | 3,99     | 4,39    | -1,10 | 0,02169 | 0,385 | 215534_at    | cDNA DKFZp586C1923                                            | -                |
| 2046  | 2,73     | 3,01    | -1,10 | 0,01330 | 0,355 | 242502_at    | Potassium voltage-gated channel, subfamily H member 5         | <i>KCNH5</i>     |
| 3496  | 4,07     | 4,47    | -1,10 | 0,02514 | 0,392 | 1560891_a_at | Full length insert cDNA clone YY75G10                         | -                |
| 4957  | 9,71     | 10,7    | -1,10 | 0,03802 | 0,419 | 221464_at    | Olfactory receptor, family 1, subfamily D, member 2           | <i>OR1D2</i>     |
| 4343  | 10,6     | 11,7    | -1,10 | 0,03233 | 0,407 | 1552768_at   | Calcium/calmodulin-dependent protein kinase kinase 1, alpha   | <i>CAMKK1</i>    |
| 4950  | 26,4     | 29,0    | -1,10 | 0,03797 | 0,419 | 208052_x_at  | Carcinoembryonic antigen-related cell adhesion molecule 3     | <i>CEACAM3</i>   |
| 5467  | 16,3     | 18,0    | -1,10 | 0,04318 | 0,432 | 219899_x_at  | NADPH dependent diflavin oxidoreductase 1                     | <i>NDOR1</i>     |
| 3547  | 5,06     | 5,56    | -1,10 | 0,02551 | 0,393 | 244588_at    | -                                                             | -                |
| 2281  | 8,01     | 8,81    | -1,10 | 0,01516 | 0,363 | 1558340_at   | DIX domain containing 1                                       | <i>DIXDC1</i>    |
| 992   | 3,16     | 3,47    | -1,10 | 0,00571 | 0,315 | 1555591_at   | PIF1 5'-to-3' DNA helicase homolog (S. cerevisiae)            | <i>PIF1</i>      |
| 5470  | 10,2     | 11,3    | -1,10 | 0,04324 | 0,432 | 243569_at    | Transmembrane protein 174                                     | <i>TMEM174</i>   |
| 3384  | 8,95     | 9,84    | -1,10 | 0,02410 | 0,389 | 220635_at    | Psoriasis susceptibility 1 candidate 2                        | <i>PSORS1C2</i>  |
| 3340  | 6,12     | 6,73    | -1,10 | 0,02371 | 0,388 | 231477_at    | Transcribed locus                                             | -                |
| 4015  | 9,30     | 10,2    | -1,10 | 0,02939 | 0,400 | 1561683_at   | cDNA clone IMAGE:5270641                                      | -                |
| 2089  | 3,50     | 3,85    | -1,10 | 0,01363 | 0,356 | 1564029_at   | Ubiquitin specific peptidase 49                               | <i>USP49</i>     |
| 5251  | 16,5     | 18,2    | -1,10 | 0,04067 | 0,423 | 230041_at    | cDNA FLJ14057 fis, clone HEMBB1000337                         | -                |
| 2158  | 5,33     | 5,86    | -1,10 | 0,01423 | 0,360 | 233145_at    | CUB and Sushi multiple domains 2                              | <i>CSMD2</i>     |
| 2458  | 8,58     | 9,44    | -1,10 | 0,01650 | 0,367 | 222323_at    | -                                                             | -                |
| 3652  | 4,75     | 5,23    | -1,10 | 0,02640 | 0,395 | 237461_at    | NLR family, pyrin domain containing 7                         | <i>NLRP7</i>     |
| 5156  | 8,69     | 9,55    | -1,10 | 0,03970 | 0,421 | 244798_at    | Similar to XP_001099403.1                                     | -                |
| 1816  | 5,85     | 6,43    | -1,10 | 0,01171 | 0,351 | 1553347_s_at | Potassium voltage-gated channel subfamily A member 6          | <i>KCNA6</i>     |
| 4928  | 5,23     | 5,75    | -1,10 | 0,03779 | 0,419 | 1561097_at   | cDNA clone IMAGE:5270855                                      | -                |
| 1025  | 3,11     | 3,42    | -1,10 | 0,00593 | 0,316 | 232084_at    | Small glutamine rich protein with tetratricopeptide repeats 2 | <i>SGTB</i>      |
| 3379  | 9,28     | 10,2    | -1,10 | 0,02405 | 0,389 | 228447_at    | Splicing factor, arginine/serine-rich 17A                     | <i>SFRS17A</i>   |
| 6099  | 2994     | 3292    | -1,10 | 0,04979 | 0,446 | 202029_x_at  | Ribosomal protein L38                                         | <i>RPL38</i>     |
| 1819  | 4,50     | 4,95    | -1,10 | 0,01172 | 0,351 | 1555245_s_at | Retinitis pigmentosa 1-like 1                                 | <i>RP1L1</i>     |
| 5782  | 7,21     | 7,93    | -1,10 | 0,04656 | 0,440 | 224042_at    | Ureidopropionase, beta                                        | <i>UPB1</i>      |
| 3880  | 3,95     | 4,34    | -1,10 | 0,02834 | 0,399 | 240212_at    | cDNA clone IMAGE:5267797                                      | -                |
| 1451  | 5,23     | 5,74    | -1,10 | 0,00887 | 0,334 | 240005_at    | Transcribed locus                                             | -                |
| 1240  | 15,9     | 17,5    | -1,10 | 0,00736 | 0,324 | 206477_s_at  | Neuro-oncological ventral antigen 2                           | <i>NOVA2</i>     |
| 3944  | 4,84     | 5,32    | -1,10 | 0,02879 | 0,399 | 211171_s_at  | Phosphodiesterase 10A                                         | <i>PDE10A</i>    |
| 2947  | 4,06     | 4,46    | -1,10 | 0,02065 | 0,383 | 208162_s_at  | Hypothetical protein FLJ10232                                 | <i>FLJ10232</i>  |
| 3220  | 4,46     | 4,90    | -1,10 | 0,02283 | 0,387 | 1557389_at   | cDNA FLJ32222 fis, clone PLACE6004101                         | -                |
| 3551  | 5,63     | 6,19    | -1,10 | 0,02559 | 0,394 | 1554978_at   | Chromosome 8 open reading frame 68                            | <i>C8orf68</i>   |
| 4793  | 6,89     | 7,58    | -1,10 | 0,03634 | 0,415 | 220585_at    | Hexokinase domain containing 1                                | <i>HKDC1</i>     |
| 5629  | 5,17     | 5,68    | -1,10 | 0,04493 | 0,436 | 238888_at    | Transcribed locus                                             | -                |
| 5878  | 8,66     | 9,52    | -1,10 | 0,04753 | 0,442 | 241847_at    | -                                                             | -                |
| 6050  | 13,1     | 14,3    | -1,10 | 0,04930 | 0,445 | 243269_s_at  | Chromosome 9 open reading frame 144                           | <i>C9orf144</i>  |
| 2919  | 7,41     | 8,14    | -1,10 | 0,02049 | 0,383 | 234048_s_at  | KIAA1632 protein                                              | <i>KIAA1632</i>  |
| 6010  | 8,81     | 9,68    | -1,10 | 0,04884 | 0,444 | 227714_s_at  | -                                                             | -                |
| 4731  | 7,31     | 8,03    | -1,10 | 0,03583 | 0,414 | 219776_s_at  | -                                                             | -                |
| 2230  | 8,81     | 9,68    | -1,10 | 0,01482 | 0,363 | 236501_at    | Sal-like 4 (Drosophila)                                       | <i>SALL4</i>     |
| 3817  | 3,51     | 3,85    | -1,10 | 0,02786 | 0,399 | 240415_at    | Transcribed locus                                             | -                |
| 5644  | 6,44     | 7,08    | -1,10 | 0,04504 | 0,436 | 224551_s_at  | Spectrin, beta, non-erythrocytic 4                            | <i>SPTBN4</i>    |



| Index | Mutated* | Normal* | FC    | P value | FDR** | Probe set    | Description                                                                   | Gene symbol |
|-------|----------|---------|-------|---------|-------|--------------|-------------------------------------------------------------------------------|-------------|
| 2801  | 4,19     | 4,60    | -1,10 | 0,01947 | 0,380 | 234869_at    | -                                                                             | -           |
| 5514  | 9,82     | 10,8    | -1,10 | 0,04367 | 0,433 | 1564251_at   | EMI domain containing 1                                                       | EMID1       |
| 965   | 3,13     | 3,44    | -1,10 | 0,00559 | 0,315 | 1555454_at   | Lipopolysaccharide-induced TNF factor                                         | LITAF       |
| 5804  | 4,73     | 5,19    | -1,10 | 0,04685 | 0,441 | 207395_at    | Butyrophilin, subfamily 1, member A1                                          | BTN1A1      |
| 1297  | 4,94     | 5,43    | -1,10 | 0,00772 | 0,325 | 1564138_at   | F-box and WD repeat domain containing 12                                      | FBXW12      |
| 2873  | 4,30     | 4,72    | -1,10 | 0,02018 | 0,383 | 1555488_at   | -                                                                             | -           |
| 6054  | 36,8     | 40,4    | -1,10 | 0,04938 | 0,446 | 231629_x_at  | Kallikrein-related peptidase 3                                                | KLK3        |
| 3733  | 6,28     | 6,90    | -1,10 | 0,02710 | 0,397 | 224244_s_at  | Apolipoprotein A-V                                                            | APOA5       |
| 3216  | 24,3     | 26,7    | -1,10 | 0,02279 | 0,387 | 1569986_x_at | Troponin T type 3 (skeletal, fast)                                            | TNNT3       |
| 3655  | 5,98     | 6,57    | -1,10 | 0,02641 | 0,395 | 233777_at    | cDNA FLJ12075 fis, clone HEMBB1002425                                         | -           |
| 3572  | 6,14     | 6,75    | -1,10 | 0,02580 | 0,394 | 237840_at    | Hypothetical gene supported by BC062774                                       | LOC388948   |
| 4824  | 9,48     | 10,4    | -1,10 | 0,03670 | 0,416 | 1554989_at   | KIAA0317 protein                                                              | KIAA0317    |
| 4959  | 10,1     | 11,1    | -1,10 | 0,03804 | 0,419 | 230184_at    | cDNA FLJ39179 fis, clone OCBBF2004147                                         | -           |
| 4657  | 8,31     | 9,12    | -1,10 | 0,03516 | 0,413 | 237021_at    | Hypothetical protein LOC144486                                                | LOC144486   |
| 5023  | 3,49     | 3,84    | -1,10 | 0,03863 | 0,420 | 1560946_at   | cDNA FLJ32698 fis, clone TESTI2000427                                         | -           |
| 5282  | 6,08     | 6,68    | -1,10 | 0,04109 | 0,425 | 240264_at    | -                                                                             | -           |
| 1789  | 7,13     | 7,83    | -1,10 | 0,01146 | 0,350 | 240350_at    | Transcribed locus                                                             | -           |
| 5130  | 6,90     | 7,58    | -1,10 | 0,03948 | 0,421 | 227659_at    | Pleckstrin homology domain-containing family A member 3                       | PLEKHA3     |
| 5669  | 5,58     | 6,13    | -1,10 | 0,04524 | 0,436 | 223885_at    | Calneuron 1                                                                   | CALN1       |
| 1501  | 7,78     | 8,55    | -1,10 | 0,00923 | 0,336 | 1552872_at   | Chromosome X and Y open reading frame 2                                       | CXYorf2     |
| 1844  | 4,42     | 4,86    | -1,10 | 0,01186 | 0,352 | 214379_at    | Transcribed locus                                                             | -           |
| 5266  | 7,75     | 8,51    | -1,10 | 0,04090 | 0,425 | 224135_at    | WD repeat domain 87                                                           | WDR87       |
| 720   | 4,14     | 4,55    | -1,10 | 0,00412 | 0,308 | 222247_at    | Putative X-linked retinopathy protein                                         | DXS542      |
| 5369  | 4,44     | 4,87    | -1,10 | 0,04214 | 0,429 | 244746_at    | Semaphorin-4D                                                                 | SEMA6D      |
| 2371  | 13,8     | 15,2    | -1,10 | 0,01582 | 0,364 | 221292_at    | Patched homolog 2 (Drosophila)                                                | PTCH2       |
| 5412  | 8,07     | 8,87    | -1,10 | 0,04253 | 0,430 | 231231_at    | Formin-like 3                                                                 | FMNL3       |
| 2404  | 4,97     | 5,46    | -1,10 | 0,01606 | 0,365 | 236743_at    | 1-acylglycerol-3-phosphate O-acyltransferase 6 (lysophosphatidic acid acyltra | AGPAT6      |
| 1767  | 3,90     | 4,28    | -1,10 | 0,01127 | 0,348 | 1560011_at   | Prostate stem cell antigen                                                    | PSCA        |
| 2635  | 3,89     | 4,27    | -1,10 | 0,01794 | 0,372 | 216748_at    | Pyrin and HIN domain family, member 1                                         | PYHIN1      |
| 4884  | 7,40     | 8,13    | -1,10 | 0,03734 | 0,418 | 215974_at    | HLA complex group 4 pseudogene 6                                              | HCG4P6      |
| 1742  | 4,93     | 5,41    | -1,10 | 0,01113 | 0,348 | 1566032_at   | cDNA DKFZp686J0929                                                            | -           |
| 3990  | 6,56     | 7,21    | -1,10 | 0,02918 | 0,400 | 232479_at    | Chromosome 20 open reading frame 42                                           | C20orf42    |
| 1201  | 4,24     | 4,65    | -1,10 | 0,00710 | 0,323 | 1569832_at   | cDNA clone IMAGE:5264841                                                      | -           |
| 5758  | 15,3     | 16,8    | -1,10 | 0,04624 | 0,439 | 222107_x_at  | Leucine zipper, putative tumor suppressor 1                                   | LZTS1       |
| 4834  | 5,50     | 6,03    | -1,10 | 0,03686 | 0,417 | 239310_at    | Transcribed locus                                                             | -           |
| 6112  | 4,64     | 5,09    | -1,10 | 0,04988 | 0,446 | 243687_at    | Transcribed locus                                                             | -           |
| 5289  | 5,47     | 6,01    | -1,10 | 0,04115 | 0,425 | 1553644_at   | Chromosome 14 open reading frame 49                                           | C14orf49    |
| 3049  | 3,93     | 4,31    | -1,10 | 0,02146 | 0,385 | 240371_at    | Hypothetical protein LOC647107                                                | LOC647107   |
| 1728  | 9,37     | 10,3    | -1,10 | 0,01105 | 0,348 | 237431_at    | Hypothetical protein LOC731851                                                | LOC731851   |
| 468   | 3,15     | 3,45    | -1,10 | 0,00247 | 0,288 | 1554784_at   | Contactin 1                                                                   | CNTN1       |
| 5065  | 8,65     | 9,49    | -1,10 | 0,03898 | 0,420 | 1557848_at   | cDNA clone IMAGE:5272084                                                      | -           |
| 2398  | 7,11     | 7,80    | -1,10 | 0,01600 | 0,365 | 1565783_at   | cDNA FLJ36796 fis, clone ADRGL2006817                                         | -           |
| 2870  | 4,94     | 5,42    | -1,10 | 0,02014 | 0,383 | 241341_at    | -                                                                             | -           |
| 1540  | 3,74     | 4,11    | -1,10 | 0,00953 | 0,337 | 220191_at    | Gastrokine 1                                                                  | GKN1        |
| 2412  | 4,71     | 5,17    | -1,10 | 0,01612 | 0,365 | 236848_s_at  | Testis expressed 13A                                                          | TEX13A      |
| 731   | 3,71     | 4,07    | -1,10 | 0,00418 | 0,308 | 241290_at    | Hypothetical protein LOC729766                                                | LOC729766   |
| 973   | 13,7     | 15,0    | -1,10 | 0,00565 | 0,315 | 1559989_at   | Tropomyosin 4                                                                 | TPM4        |
| 3613  | 7,97     | 8,75    | -1,10 | 0,02607 | 0,394 | 1568981_at   | cDNA clone IMAGE:5277449                                                      | -           |
| 500   | 3,34     | 3,67    | -1,10 | 0,00266 | 0,289 | 1555433_at   | Solute carrier family 39, member 14                                           | SLC39A14    |
| 1531  | 5,24     | 5,75    | -1,10 | 0,00948 | 0,337 | 1567027_at   | SH3-domain GRB2-like pseudogene 2                                             | SH3GLP2     |
| 4258  | 10,0     | 11,0    | -1,10 | 0,03164 | 0,406 | 208303_s_at  | Cytokine receptor-like factor 2                                               | CRLF2       |
| 2094  | 7,41     | 8,12    | -1,10 | 0,01370 | 0,358 | 235582_at    | E2F transcription factor 2                                                    | E2F2        |
| 2645  | 10,9     | 12,0    | -1,10 | 0,01804 | 0,373 | 228911_at    | ADAM metallopeptidase with thrombospondin type 1 motif, 7                     | ADAMTS7     |
| 2823  | 4,13     | 4,53    | -1,10 | 0,01971 | 0,381 | 231323_at    | Proteasome (prosome, macropain) subunit, beta type, 2                         | PSMB2       |
| 1293  | 3,91     | 4,29    | -1,10 | 0,00770 | 0,325 | 215998_at    | Clone 24533 mRNA sequence                                                     | -           |
| 3212  | 5,22     | 5,73    | -1,10 | 0,02274 | 0,387 | 235357_at    | D4, zinc and double PHD fingers, family 3                                     | DPF3        |
| 2950  | 23,0     | 25,2    | -1,10 | 0,02071 | 0,384 | 215822_x_at  | Myelin transcription factor 1                                                 | MYT1        |

| Index | Mutated* | Normal* | FC    | P value | FDR** | Probe set    | Description                                                        | Gene symbol      |
|-------|----------|---------|-------|---------|-------|--------------|--------------------------------------------------------------------|------------------|
| 1341  | 2,92     | 3,20    | -1,10 | 0,00805 | 0,328 | 1552458_at   | Methyl-CpG binding domain protein 3-like 1                         | <i>MBD3L1</i>    |
| 3123  | 12,3     | 13,4    | -1,10 | 0,02211 | 0,387 | 235455_at    | Family with sequence similarity 131, member C                      | <i>FAM131C</i>   |
| 4767  | 5,14     | 5,63    | -1,10 | 0,03611 | 0,414 | 1555799_at   | Fc receptor-like 5                                                 | <i>FCRL5</i>     |
| 2164  | 5,84     | 6,40    | -1,10 | 0,01432 | 0,361 | 231390_at    | Hypothetical protein LOC730116                                     | <i>LOC730116</i> |
| 1751  | 4,42     | 4,84    | -1,10 | 0,01117 | 0,348 | 237260_at    | cDNA clone IMAGE:4838968                                           | -                |
| 4641  | 10,5     | 11,5    | -1,10 | 0,03499 | 0,412 | 227513_s_at  | Leucine rich repeat (in FLII) interacting protein 1                | <i>LRRFIP1</i>   |
| 4490  | 7,78     | 8,53    | -1,10 | 0,03377 | 0,411 | 216992_s_at  | Glutamate receptor, metabotropic 8                                 | <i>GRM8</i>      |
| 5580  | 5,46     | 5,99    | -1,10 | 0,04449 | 0,436 | 1566486_at   | cDNA DKFZp547M116                                                  | -                |
| 5503  | 3,98     | 4,37    | -1,10 | 0,04357 | 0,433 | 237820_at    | Transcribed locus                                                  | -                |
| 3644  | 10,4     | 11,4    | -1,10 | 0,02634 | 0,395 | 206887_at    | Chemokine binding protein 2                                        | <i>CCBP2</i>     |
| 2902  | 6,23     | 6,84    | -1,10 | 0,02040 | 0,383 | 229922_at    | G protein regulated inducer of neurite outgrowth 1                 | <i>GPRIN1</i>    |
| 4228  | 10,2     | 11,1    | -1,10 | 0,03133 | 0,405 | 1562263_at   | Lysyl oxidase-like 2                                               | <i>LOXL2</i>     |
| 1559  | 8,20     | 8,99    | -1,10 | 0,00964 | 0,338 | 1561270_at   | cDNA clone IMAGE:5271318                                           | -                |
| 469   | 7,18     | 7,87    | -1,10 | 0,00249 | 0,289 | 241074_at    | Similar to Ig heavy chain V region M315 precursor                  | -                |
| 4640  | 6,41     | 7,03    | -1,10 | 0,03499 | 0,412 | 1561611_at   | Full length insert cDNA clone ZD67H01                              | -                |
| 4230  | 10,0     | 11,0    | -1,10 | 0,03134 | 0,405 | 1554475_a_at | Chromosome 19 open reading frame 47                                | <i>C19orf47</i>  |
| 958   | 4,30     | 4,71    | -1,10 | 0,00553 | 0,315 | 233033_at    | Zinc finger E-box binding homeobox 2                               | <i>ZEB2</i>      |
| 3766  | 3,12     | 3,42    | -1,10 | 0,02737 | 0,397 | 1552875_a_at | CD200 receptor 1                                                   | <i>CD200R1</i>   |
| 3672  | 4,26     | 4,67    | -1,10 | 0,02652 | 0,395 | 1553796_at   | Hypothetical locus FLJ30594                                        | <i>FLJ30594</i>  |
| 6117  | 11,5     | 12,6    | -1,10 | 0,04995 | 0,446 | 215055_at    | UDP-GlcNAc:betaGal beta-1,3-N-acetylglucosaminyltransferase-like 1 | <i>B3GNTL1</i>   |
| 5967  | 7,50     | 8,22    | -1,10 | 0,04846 | 0,444 | 221990_at    | Paired box 8                                                       | <i>PAX8</i>      |
| 1182  | 3,95     | 4,33    | -1,10 | 0,00696 | 0,322 | 1567250_at   | Olfactory receptor, family 10, subfamily A, member 3               | <i>OR10A3</i>    |
| 3022  | 4,21     | 4,62    | -1,10 | 0,02128 | 0,385 | 234174_at    | -                                                                  | -                |
| 4905  | 6,79     | 7,45    | -1,10 | 0,03751 | 0,418 | 207960_at    | -                                                                  | -                |
| 2626  | 3,71     | 4,07    | -1,10 | 0,01787 | 0,372 | 216328_at    | Sialic acid binding Ig-like lectin 8                               | <i>SIGLEC8</i>   |
| 1320  | 3,41     | 3,74    | -1,10 | 0,00787 | 0,326 | 1561604_at   | cDNA clone IMAGE:4796102                                           | -                |
| 4519  | 7,04     | 7,72    | -1,10 | 0,03406 | 0,412 | 239976_at    | Acyl-Coenzyme A dehydrogenase family, member 9                     | <i>ACAD9</i>     |
| 4065  | 5,41     | 5,93    | -1,10 | 0,02982 | 0,401 | 234766_at    | Olfactory receptor, family 8, subfamily D, member 2                | <i>OR8D2</i>     |
| 5406  | 12,5     | 13,7    | -1,10 | 0,04243 | 0,429 | 1560001_at   | Similar to 40S ribosomal protein S3a                               | <i>LOC649314</i> |
| 4471  | 3,36     | 3,68    | -1,10 | 0,03359 | 0,411 | 233753_at    | Splicing factor, arginine/serine-rich 15                           | <i>SFRS15</i>    |
| 5732  | 4,69     | 5,14    | -1,10 | 0,04598 | 0,438 | 1555738_at   | CKLF-like MARVEL transmembrane domain containing 1                 | <i>CMTM1</i>     |
| 3917  | 7,70     | 8,44    | -1,10 | 0,02861 | 0,399 | 1555308_at   | Caspase recruitment domain family, member 14                       | <i>CARD14</i>    |
| 5461  | 8,30     | 9,09    | -1,10 | 0,04313 | 0,432 | 231583_at    | Keratin 74                                                         | <i>KRT74</i>     |
| 2265  | 4,51     | 4,95    | -1,10 | 0,01506 | 0,363 | 1562865_at   | Clone IMAGE:4279626, mRNA                                          | -                |
| 4704  | 13,0     | 14,2    | -1,10 | 0,03557 | 0,413 | 204356_at    | LIM domain kinase 1                                                | <i>LIMK1</i>     |
| 4392  | 5,47     | 5,99    | -1,10 | 0,03272 | 0,407 | 228017_s_at  | Chromosome 20 open reading frame 58                                | <i>C20orf58</i>  |
| 5247  | 47,5     | 52,1    | -1,10 | 0,04062 | 0,423 | 235817_at    | Transmembrane protein 184A                                         | <i>TMEM184A</i>  |
| 3921  | 5,19     | 5,68    | -1,10 | 0,02863 | 0,399 | 211018_at    | Lanosterol synthase (2,3-oxidosqualene-lanosterol cyclase)         | <i>LSS</i>       |
| 5291  | 39,4     | 43,2    | -1,10 | 0,04119 | 0,426 | 1553262_a_at | Urotensin 2 receptor                                               | <i>UTS2R</i>     |
| 6068  | 4,47     | 4,90    | -1,10 | 0,04951 | 0,446 | 239989_at    | Transcribed locus                                                  | -                |
| 4444  | 5,64     | 6,18    | -1,10 | 0,03339 | 0,411 | 1563539_at   | cDNA DKFZp762C115                                                  | -                |
| 1415  | 3,55     | 3,88    | -1,10 | 0,00856 | 0,331 | 233830_at    | Hypothetical protein LOC90246                                      | <i>LOC90246</i>  |
| 2007  | 3,65     | 4,00    | -1,10 | 0,01309 | 0,355 | 237905_at    | Keratin 25                                                         | <i>KRT25</i>     |
| 5611  | 8,83     | 9,67    | -1,10 | 0,04474 | 0,436 | 233726_at    | cDNA DKFZp586C1523                                                 | -                |
| 3276  | 5,46     | 5,98    | -1,10 | 0,02333 | 0,388 | 233361_at    | Ankyrin repeat domain 44                                           | <i>ANKRD44</i>   |
| 4895  | 2,86     | 3,14    | -1,10 | 0,03741 | 0,418 | 216703_at    | -                                                                  | -                |
| 5548  | 8,73     | 9,57    | -1,10 | 0,04411 | 0,435 | 1552503_at   | Fraser syndrome 1                                                  | <i>FRAS1</i>     |
| 2693  | 4,05     | 4,43    | -1,10 | 0,01847 | 0,375 | 239988_at    | Transcribed locus                                                  | -                |
| 3947  | 9,37     | 10,3    | -1,10 | 0,02882 | 0,399 | 233991_at    | Clone 24894 mRNA sequence                                          | -                |
| 2566  | 4,17     | 4,56    | -1,10 | 0,01740 | 0,371 | 240011_at    | Tau tubulin kinase 2                                               | <i>TTBK2</i>     |
| 5153  | 6,28     | 6,88    | -1,10 | 0,03965 | 0,421 | 1566097_at   | cDNA DKFZp761K02121                                                | -                |
| 2984  | 3,51     | 3,85    | -1,10 | 0,02097 | 0,384 | 1558652_at   | Hypothetical protein FLJ10081                                      | <i>FLJ10081</i>  |
| 3629  | 6,11     | 6,69    | -1,10 | 0,02623 | 0,395 | 217128_s_at  | Calcium/calmodulin-dependent protein kinase IG                     | <i>CAMK1G</i>    |
| 3976  | 8,32     | 9,11    | -1,10 | 0,02907 | 0,400 | 222928_s_at  | Retinoic acid induced 16                                           | <i>RAI16</i>     |
| 4550  | 10,6     | 11,7    | -1,10 | 0,03440 | 0,412 | 216739_at    | cDNA FLJ20874 fis, clone ADKA02818                                 | -                |
| 3846  | 6,59     | 7,21    | -1,09 | 0,02807 | 0,399 | 220528_at    | Vanin 3                                                            | <i>VNN3</i>      |
| 2079  | 2,99     | 3,27    | -1,09 | 0,01358 | 0,356 | 1553736_at   | Coiled-coil domain containing 131                                  | <i>CCDC131</i>   |

| Index | Mutated* | Normal* | FC    | P value | FDR** | Probe set    | Description                                              | Gene symbol |
|-------|----------|---------|-------|---------|-------|--------------|----------------------------------------------------------|-------------|
| 6024  | 4,17     | 4,57    | -1,09 | 0,04901 | 0,445 | 243822_at    | Transcribed locus                                        | -           |
| 4877  | 5,49     | 6,01    | -1,09 | 0,03724 | 0,417 | 223893_at    | Enamelin                                                 | ENAM        |
| 3912  | 8,32     | 9,11    | -1,09 | 0,02856 | 0,399 | 206981_at    | Sodium channel, voltage-gated, type IV, alpha subunit    | SCN4A       |
| 5067  | 12,3     | 13,5    | -1,09 | 0,03900 | 0,420 | 1566474_at   | cDNA DKFZp451O1018                                       | -           |
| 3737  | 10,7     | 11,7    | -1,09 | 0,02713 | 0,397 | 1563816_at   | GRB2-associated binding protein family, member 4         | GAB4        |
| 3348  | 10,1     | 11,0    | -1,09 | 0,02378 | 0,388 | 240767_x_at  | Vacuolar protein sorting 13 homolog A (S. cerevisiae)    | VPS13A      |
| 2852  | 3,62     | 3,96    | -1,09 | 0,02000 | 0,383 | 238410_x_at  | Transcribed locus                                        | -           |
| 2924  | 4,13     | 4,53    | -1,09 | 0,02050 | 0,383 | 216886_at    | Cholinergic receptor, nicotinic, alpha 4                 | CHRNA4      |
| 5788  | 2,97     | 3,25    | -1,09 | 0,04660 | 0,440 | 201062_at    | Stomatin                                                 | STOM        |
| 4383  | 11,5     | 12,5    | -1,09 | 0,03265 | 0,407 | 230488_s_at  | BPR                                                      | LOC138948   |
| 4952  | 91,4     | 100     | -1,09 | 0,03799 | 0,419 | 179_at       | Postmeiotic segregation increased 2-like 11              | PMS2L11     |
| 682   | 4,59     | 5,02    | -1,09 | 0,00391 | 0,308 | 243468_at    | Expressed in prostate and testis                         | PATE        |
| 2031  | 5,15     | 5,64    | -1,09 | 0,01323 | 0,355 | 234743_at    | LIM domains containing 1                                 | LIMD1       |
| 4104  | 25,7     | 28,1    | -1,09 | 0,03016 | 0,402 | 234241_at    | -                                                        | -           |
| 1115  | 4,89     | 5,35    | -1,09 | 0,00653 | 0,319 | 214979_at    | ATP-binding cassette, sub-family C (CFTR/MRP), member 3  | ABCC3       |
| 6108  | 16,8     | 18,4    | -1,09 | 0,04986 | 0,446 | 232192_at    | Hypothetical protein LOC153811                           | LOC153811   |
| 4267  | 4,13     | 4,52    | -1,09 | 0,03174 | 0,406 | 235995_at    | -                                                        | -           |
| 2642  | 4,24     | 4,64    | -1,09 | 0,01801 | 0,373 | 240396_at    | Interleukin 20 receptor, alpha                           | IL20RA      |
| 2683  | 3,91     | 4,28    | -1,09 | 0,01837 | 0,374 | 215762_at    | Transcribed locus                                        | -           |
| 1642  | 3,27     | 3,57    | -1,09 | 0,01035 | 0,344 | 223835_x_at  | Orthopedia homeobox                                      | OTP         |
| 5199  | 14,0     | 15,3    | -1,09 | 0,04011 | 0,422 | 1552419_s_at | Tubulin tyrosine ligase-like family, member 10           | TTL10       |
| 5859  | 17,4     | 19,0    | -1,09 | 0,04737 | 0,442 | 243411_at    | Polymerase (DNA-directed), delta interacting protein 3   | POLDIP3     |
| 5512  | 9,92     | 10,9    | -1,09 | 0,04366 | 0,433 | 244858_at    | TGFB-induced factor homeobox 1                           | TGIF1       |
| 4936  | 4,77     | 5,22    | -1,09 | 0,03786 | 0,419 | 237669_at    | -                                                        | -           |
| 5754  | 4,33     | 4,74    | -1,09 | 0,04619 | 0,439 | 1557682_a_at | Hypothetical protein LOC284688                           | -           |
| 3592  | 33,5     | 36,7    | -1,09 | 0,02591 | 0,394 | 206508_at    | CD70 molecule                                            | CD70        |
| 2483  | 3,24     | 3,55    | -1,09 | 0,01673 | 0,367 | 224533_s_at  | Chromosome 6 open reading frame 142                      | C6orf142    |
| 475   | 3,02     | 3,30    | -1,09 | 0,00253 | 0,289 | 208288_at    | ATP-binding cassette, sub-family B (MDR/TAP), member 11  | ABCB11      |
| 2646  | 5,00     | 5,47    | -1,09 | 0,01804 | 0,373 | 221442_at    | Melanocortin 3 receptor                                  | MC3R        |
| 2976  | 4,67     | 5,11    | -1,09 | 0,02092 | 0,384 | 229967_at    | CKLF-like MARVEL transmembrane domain containing 2       | CMTM2       |
| 5882  | 9,04     | 9,89    | -1,09 | 0,04759 | 0,442 | 216018_at    | Ring finger protein 5                                    | RNF5        |
| 3513  | 4,11     | 4,50    | -1,09 | 0,02522 | 0,392 | 242821_at    | Chromosome 9 open reading frame 93                       | C9orf93     |
| 5598  | 8,65     | 9,46    | -1,09 | 0,04464 | 0,436 | 1556620_at   | Full length insert cDNA clone YT69G03                    | -           |
| 3665  | 5,34     | 5,84    | -1,09 | 0,02649 | 0,395 | 239030_at    | -                                                        | -           |
| 4083  | 3,42     | 3,74    | -1,09 | 0,02999 | 0,402 | 230719_at    | Transcribed locus                                        | -           |
| 3671  | 4,54     | 4,97    | -1,09 | 0,02652 | 0,395 | 1560896_a_at | Full length insert cDNA clone ZD42A09                    | -           |
| 4084  | 7,40     | 8,09    | -1,09 | 0,02999 | 0,402 | 237323_at    | Hexokinase domain containing 1                           | HKDC1       |
| 5419  | 4,62     | 5,05    | -1,09 | 0,04258 | 0,430 | 1558300_at   | EF-hand calcium binding domain 5                         | EFCAB5      |
| 5984  | 9,53     | 10,4    | -1,09 | 0,04860 | 0,444 | 240023_at    | Transcribed locus                                        | -           |
| 957   | 3,11     | 3,40    | -1,09 | 0,00552 | 0,315 | 243335_at    | -                                                        | -           |
| 4209  | 3,38     | 3,70    | -1,09 | 0,03114 | 0,404 | 234839_at    | cDNA DKFZp564I103                                        | -           |
| 5408  | 5,33     | 5,83    | -1,09 | 0,04248 | 0,429 | 203784_s_at  | DEAD (Asp-Glu-Ala-Asp) box polypeptide 28                | DDX28       |
| 3261  | 15,3     | 16,7    | -1,09 | 0,02315 | 0,388 | 1557666_s_at | Chromosome 9 open reading frame 98                       | C9orf98     |
| 5700  | 11,0     | 12,0    | -1,09 | 0,04564 | 0,438 | 1561542_at   | -                                                        | -           |
| 5418  | 4,58     | 5,01    | -1,09 | 0,04258 | 0,430 | 1560870_a_at | Full length insert cDNA clone ZD45F06                    | -           |
| 885   | 2,75     | 3,01    | -1,09 | 0,00511 | 0,313 | 1552732_at   | Actin-binding Rho activating protein                     | ABRA        |
| 2909  | 3,75     | 4,10    | -1,09 | 0,02045 | 0,383 | 216120_s_at  | ATPase, Ca++ transporting, plasma membrane 2             | ATP2B2      |
| 5189  | 6,57     | 7,18    | -1,09 | 0,03998 | 0,421 | 244199_at    | Twinfilin, actin-binding protein, homolog 1 (Drosophila) | TWF1        |
| 3760  | 6,60     | 7,22    | -1,09 | 0,02734 | 0,397 | 1561293_at   | cDNA clone IMAGE:5296640                                 | -           |
| 5437  | 4,16     | 4,55    | -1,09 | 0,04284 | 0,431 | 236747_at    | -                                                        | -           |
| 4751  | 4,57     | 5,00    | -1,09 | 0,03600 | 0,414 | 1562984_at   | Clone IMAGE:5171167, mRNA                                | -           |
| 6110  | 7,65     | 8,37    | -1,09 | 0,04987 | 0,446 | 228978_at    | Hypothetical LOC645722                                   | LOC645722   |
| 2937  | 2,88     | 3,15    | -1,09 | 0,02060 | 0,383 | 210498_at    | Clathrin, heavy chain (Hc)                               | CLTC        |
| 5224  | 3,70     | 4,04    | -1,09 | 0,04040 | 0,423 | 243368_at    | Transcribed locus                                        | -           |
| 6002  | 9,61     | 10,5    | -1,09 | 0,04877 | 0,444 | 244713_at    | Transcribed locus                                        | -           |
| 1859  | 35,3     | 38,6    | -1,09 | 0,01198 | 0,352 | 1556900_at   | Hypothetical protein LOC149773                           | LOC149773   |
| 2243  | 3,51     | 3,84    | -1,09 | 0,01492 | 0,363 | 238236_at    | Transcribed locus                                        | -           |

| Index | Mutated* | Normal* | FC    | P value | FDR** | Probe set    | Description                                                             | Gene symbol      |
|-------|----------|---------|-------|---------|-------|--------------|-------------------------------------------------------------------------|------------------|
| 5243  | 3,96     | 4,33    | -1,09 | 0,04060 | 0,423 | 1558845_at   | cDNA FLJ40376 fis, clone TESTI2035121                                   | -                |
| 5940  | 4,09     | 4,47    | -1,09 | 0,04815 | 0,443 | 217624_at    | PDGFA associated protein 1                                              | <i>PDAP1</i>     |
| 315   | 3,13     | 3,43    | -1,09 | 0,00159 | 0,272 | 217345_at    | -                                                                       | -                |
| 4772  | 3,90     | 4,27    | -1,09 | 0,03619 | 0,414 | 1560905_at   | Full length insert cDNA clone YB65G12                                   | -                |
| 4046  | 4,57     | 4,99    | -1,09 | 0,02965 | 0,401 | 207637_at    | WSC domain containing 2                                                 | <i>WSCD2</i>     |
| 3686  | 4,24     | 4,63    | -1,09 | 0,02662 | 0,395 | 1565896_at   | cDNA clone IMAGE:5266332                                                | -                |
| 3607  | 5,13     | 5,61    | -1,09 | 0,02603 | 0,394 | 217484_at    | Complement component (3b/4b) receptor 1 (Knops blood group)             | <i>CR1</i>       |
| 4821  | 3,92     | 4,29    | -1,09 | 0,03667 | 0,416 | 237590_at    | -                                                                       | -                |
| 666   | 3,81     | 4,17    | -1,09 | 0,00384 | 0,308 | 1557886_at   | Coiled-coil domain containing 46                                        | <i>CCDC46</i>    |
| 2677  | 4,04     | 4,42    | -1,09 | 0,01832 | 0,374 | 1563018_at   | T-box 5                                                                 | <i>TBX5</i>      |
| 1088  | 3,73     | 4,08    | -1,09 | 0,00637 | 0,319 | 233338_at    | Similar to Nucleosome-binding protein 1                                 | <i>LOC653135</i> |
| 4130  | 6,35     | 6,94    | -1,09 | 0,03040 | 0,402 | 221415_s_at  | Gap junction protein, alpha 10, 59kDa                                   | <i>GJA10</i>     |
| 6089  | 5,71     | 6,24    | -1,09 | 0,04971 | 0,446 | 226904_at    | Solute carrier family 6, member 10                                      | <i>SLC6A10P</i>  |
| 5499  | 4,20     | 4,59    | -1,09 | 0,04353 | 0,433 | 241258_at    | Transcribed locus                                                       | -                |
| 3658  | 3,86     | 4,22    | -1,09 | 0,02641 | 0,395 | 211690_at    | Ribosomal protein S6                                                    | <i>RPS6</i>      |
| 5769  | 11,6     | 12,7    | -1,09 | 0,04635 | 0,439 | 207609_s_at  | Cytochrome P450, family 1, subfamily A, polypeptide 2                   | <i>CYP1A2</i>    |
| 3916  | 4,41     | 4,82    | -1,09 | 0,02860 | 0,399 | 1556578_a_at | Hypothetical gene supported by AK056507                                 | <i>FLJ31945</i>  |
| 1051  | 5,43     | 5,93    | -1,09 | 0,00614 | 0,319 | 1560181_at   | Clone IMAGE:5752728, mRNA                                               | -                |
| 3118  | 4,47     | 4,88    | -1,09 | 0,02205 | 0,387 | 234618_at    | cDNA DKFZp586M151                                                       | -                |
| 3878  | 5,36     | 5,86    | -1,09 | 0,02833 | 0,399 | 237468_at    | Transcribed locus                                                       | -                |
| 2390  | 31,2     | 34,0    | -1,09 | 0,01594 | 0,365 | 213442_x_at  | SAM pointed domain containing ets transcription factor                  | <i>SPDEF</i>     |
| 4211  | 4,96     | 5,42    | -1,09 | 0,03117 | 0,405 | 1555792_a_at | Coiled-coil domain containing 116                                       | <i>CCDC116</i>   |
| 3562  | 7,33     | 8,01    | -1,09 | 0,02570 | 0,394 | 215816_at    | Glucuronidase, beta/immunoglobulin lambda-like polypeptide 1 pseudogene | <i>LOC91316</i>  |
| 4033  | 4,20     | 4,59    | -1,09 | 0,02955 | 0,401 | 240678_at    | Transcribed locus                                                       | -                |
| 1037  | 4,03     | 4,41    | -1,09 | 0,00602 | 0,318 | 208434_at    | Myelodysplasia syndrome 1                                               | <i>MDS1</i>      |
| 4463  | 3,53     | 3,86    | -1,09 | 0,03352 | 0,411 | 220025_at    | T-box, brain, 1                                                         | <i>TBR1</i>      |
| 4447  | 3,06     | 3,34    | -1,09 | 0,03340 | 0,411 | 206835_at    | Statherin                                                               | <i>STATH</i>     |
| 1638  | 3,96     | 4,33    | -1,09 | 0,01032 | 0,344 | 1569418_at   | cDNA clone IMAGE:4894320                                                | -                |
| 6121  | 4,83     | 5,27    | -1,09 | 0,04998 | 0,446 | 1556907_at   | Zinc finger protein 474                                                 | <i>ZNF474</i>    |
| 1648  | 7,68     | 8,39    | -1,09 | 0,01037 | 0,344 | 1553637_s_at | Transmembrane and coiled-coil domains 5                                 | <i>TMC05</i>     |
| 4847  | 4,57     | 4,99    | -1,09 | 0,03693 | 0,417 | 205152_at    | Solute carrier family 6, member 1                                       | <i>SLC6A1</i>    |
| 5929  | 9,12     | 9,96    | -1,09 | 0,04806 | 0,443 | 1556355_x_at | Ral guanine nucleotide dissociation stimulator-like 3                   | <i>RGL3</i>      |
| 5290  | 15,8     | 17,3    | -1,09 | 0,04116 | 0,425 | 227381_at    | Cerebral endothelial cell adhesion molecule 1                           | <i>CEECAM1</i>   |
| 5264  | 17,8     | 19,4    | -1,09 | 0,04089 | 0,425 | 217219_at    | cDNA DKFZP434A062                                                       | -                |
| 2584  | 4,42     | 4,83    | -1,09 | 0,01753 | 0,371 | 240935_at    | -                                                                       | -                |
| 3668  | 27,3     | 29,8    | -1,09 | 0,02652 | 0,395 | 1560300_a_at | DMRT-like family C1                                                     | <i>DMRTC1</i>    |
| 5698  | 6,98     | 7,63    | -1,09 | 0,04560 | 0,438 | 242155_x_at  | Transcribed locus                                                       | -                |
| 2104  | 3,95     | 4,31    | -1,09 | 0,01379 | 0,358 | 240177_at    | Transcribed locus                                                       | -                |
| 5071  | 6,02     | 6,57    | -1,09 | 0,03903 | 0,420 | 1565772_at   | p21/Cdc42/Rac1-activated kinase 1 (STE20 homolog, yeast)                | <i>PAK1</i>      |
| 2417  | 3,61     | 3,94    | -1,09 | 0,01617 | 0,365 | 216201_at    | cDNA FLJ21586 fis, clone COL06920                                       | -                |
| 5543  | 32,7     | 35,7    | -1,09 | 0,04407 | 0,435 | 242151_at    | Transcribed locus                                                       | -                |
| 2439  | 9,82     | 10,7    | -1,09 | 0,01630 | 0,365 | 239702_x_at  | -                                                                       | -                |
| 5989  | 4,79     | 5,23    | -1,09 | 0,04866 | 0,444 | 240783_at    | Transcribed locus                                                       | -                |
| 1462  | 3,42     | 3,73    | -1,09 | 0,00894 | 0,334 | 1568647_at   | cDNA clone IMAGE:4426835                                                | -                |
| 5576  | 4,60     | 5,02    | -1,09 | 0,04443 | 0,436 | 240650_at    | Calcium channel, voltage-dependent, R type, alpha 1E subunit            | <i>CACNA1E</i>   |
| 3081  | 5,71     | 6,23    | -1,09 | 0,02171 | 0,385 | 237824_at    | Transcribed locus                                                       | -                |
| 884   | 4,87     | 5,31    | -1,09 | 0,00511 | 0,313 | 1552842_at   | Heparan sulfate 6-O-sulfotransferase 3                                  | <i>HS6ST3</i>    |
| 4357  | 5,61     | 6,13    | -1,09 | 0,03241 | 0,407 | 207894_s_at  | T-cell leukemia/lymphoma 6                                              | <i>TCL6</i>      |
| 4756  | 3,90     | 4,26    | -1,09 | 0,03605 | 0,414 | 232655_at    | UDP glucuronosyltransferase 1 family, polypeptide A6                    | <i>UGT1A6</i>    |
| 3843  | 14,9     | 16,3    | -1,09 | 0,02806 | 0,399 | 240114_s_at  | Transmembrane protein 174                                               | <i>TMEM174</i>   |
| 1873  | 3,23     | 3,52    | -1,09 | 0,01212 | 0,354 | 240986_at    | Transcribed locus                                                       | -                |
| 1307  | 4,08     | 4,46    | -1,09 | 0,00779 | 0,325 | 236374_at    | Cortexin 3                                                              | <i>CTXN3</i>     |
| 2965  | 3,74     | 4,08    | -1,09 | 0,02083 | 0,384 | 1563502_at   | Zinc finger, DHHC-type containing 2                                     | <i>ZDHHC2</i>    |
| 2840  | 4,43     | 4,83    | -1,09 | 0,01982 | 0,382 | 1553534_at   | NLR family, pyrin domain containing 10                                  | <i>NLRP10</i>    |
| 4296  | 4,30     | 4,70    | -1,09 | 0,03194 | 0,407 | 1561018_at   | Full length insert cDNA clone ZD44H09                                   | -                |
| 4607  | 4,21     | 4,59    | -1,09 | 0,03481 | 0,412 | 231364_at    | cDNA clone IMAGE:4796864                                                | -                |
| 5809  | 4,61     | 5,03    | -1,09 | 0,04690 | 0,441 | 240346_at    | Hypothetical LOC644222                                                  | <i>LOC644222</i> |

| Index | Mutated* | Normal* | FC    | P value | FDR** | Probe set       | Description                                                 | Gene symbol |
|-------|----------|---------|-------|---------|-------|-----------------|-------------------------------------------------------------|-------------|
| 3952  | 7,21     | 7,87    | -1,09 | 0,02888 | 0,399 | 1563805_a_at    | Family with sequence similarity 83, member C                | FAM83C      |
| 5536  | 5,97     | 6,51    | -1,09 | 0,04395 | 0,434 | 221072_at       | Chromosome 9 open reading frame 31                          | C9orf31     |
| 1784  | 4,11     | 4,49    | -1,09 | 0,01139 | 0,349 | 1562066_at      | Hypothetical protein LOC286144                              | LOC286144   |
| 5221  | 7,73     | 8,44    | -1,09 | 0,04037 | 0,423 | 221346_at       | Olfactory receptor, family 10, subfamily J, member 1        | OR10J1      |
| 2798  | 4,34     | 4,74    | -1,09 | 0,01944 | 0,380 | 221347_at       | Cholinergic receptor, muscarinic 5                          | CHRM5       |
| 4218  | 8,32     | 9,08    | -1,09 | 0,03125 | 0,405 | 205973_at       | Fasciculation and elongation protein zeta 1 (zygin I)       | FEZ1        |
| 1105  | 3,76     | 4,10    | -1,09 | 0,00646 | 0,319 | AFFX-ThrX-5_a - | -                                                           | -           |
| 1959  | 2,85     | 3,12    | -1,09 | 0,01281 | 0,355 | 204721_s_at     | DnaJ (Hsp40) homolog, subfamily C, member 6                 | DNAJC6      |
| 919   | 3,01     | 3,28    | -1,09 | 0,00529 | 0,313 | 230517_at       | Similar to GLI-Kruppel family member HKR1                   | tcag7.1196  |
| 5651  | 6,60     | 7,21    | -1,09 | 0,04507 | 0,436 | 1561060_at      | cDNA clone IMAGE:5298862                                    | -           |
| 5678  | 4,00     | 4,37    | -1,09 | 0,04533 | 0,436 | 237889_s_at     | Hypothetical LOC553137                                      | LOC553137   |
| 5487  | 4,83     | 5,27    | -1,09 | 0,04343 | 0,433 | 1559674_at      | Zinc finger protein 333                                     | ZNF333      |
| 3633  | 10,7     | 11,7    | -1,09 | 0,02627 | 0,395 | 219746_at       | D4, zinc and double PHD fingers, family 3                   | DPF3        |
| 5436  | 5,30     | 5,78    | -1,09 | 0,04283 | 0,431 | 241383_at       | Similar to Hypothetical protein A930006D11                  | LOC201181   |
| 1413  | 18,0     | 19,7    | -1,09 | 0,00854 | 0,330 | 204626_s_at     | Integrin, beta 3 (platelet glycoprotein IIIa, antigen CD61) | ITGB3       |
| 4913  | 4,39     | 4,79    | -1,09 | 0,03757 | 0,418 | 219621_at       | Claspin homolog (Xenopus laevis)                            | CLSPN       |
| 4031  | 8,04     | 8,77    | -1,09 | 0,02952 | 0,400 | 231651_at       | cDNA FLJ36110 fis, clone TESTI2021939                       | -           |
| 4923  | 3,81     | 4,15    | -1,09 | 0,03772 | 0,419 | 211319_at       | -                                                           | -           |
| 3973  | 3,84     | 4,19    | -1,09 | 0,02904 | 0,400 | 1556084_at      | Heterogeneous nuclear ribonucleoprotein M                   | HNRPM       |
| 3099  | 2,78     | 3,03    | -1,09 | 0,02188 | 0,386 | 207523_at       | Chromosome 6 open reading frame 10                          | C6orf10     |
| 926   | 3,06     | 3,33    | -1,09 | 0,00533 | 0,313 | 241072_s_at     | -                                                           | -           |
| 3985  | 3,82     | 4,16    | -1,09 | 0,02914 | 0,400 | 241297_at       | -                                                           | -           |
| 4489  | 11,5     | 12,6    | -1,09 | 0,03377 | 0,411 | 217711_at       | TEK tyrosine kinase, endothelial                            | TEK         |
| 2547  | 3,77     | 4,11    | -1,09 | 0,01721 | 0,369 | 1569680_at      | cDNA clone IMAGE:4288701                                    | -           |
| 3799  | 3,76     | 4,10    | -1,09 | 0,02767 | 0,398 | 207315_at       | CD226 molecule                                              | CD226       |
| 2409  | 3,72     | 4,06    | -1,09 | 0,01610 | 0,365 | 231675_s_at     | Alcohol dehydrogenase 4 (class II), pi polypeptide          | ADH4        |
| 2725  | 13,9     | 15,2    | -1,09 | 0,01872 | 0,376 | 239076_at       | Septin 13                                                   | SEPT13      |
| 4956  | 7,05     | 7,69    | -1,09 | 0,03802 | 0,419 | 243883_at       | Matrix metalloproteinase 15 (membrane-inserted)             | MMP15       |
| 2923  | 5,63     | 6,14    | -1,09 | 0,02050 | 0,383 | 242421_at       | Transcribed locus                                           | -           |
| 591   | 3,07     | 3,35    | -1,09 | 0,00327 | 0,301 | 1557802_at      | Clone IMAGE:5547568, mRNA                                   | -           |
| 3924  | 3,97     | 4,33    | -1,09 | 0,02868 | 0,399 | 233447_at       | Chromosome 6 open reading frame 86                          | C6orf86     |
| 3804  | 35,2     | 38,4    | -1,09 | 0,02770 | 0,398 | 1557371_a_at    | Hypothetical protein LOC158376                              | LOC158376   |
| 5578  | 11,3     | 12,3    | -1,09 | 0,04447 | 0,436 | 204397_at       | Echinoderm microtubule associated protein like 2            | EML2        |
| 4552  | 4,60     | 5,02    | -1,09 | 0,03441 | 0,412 | 215297_at       | Hypothetical locus LOC441204                                | LOC441204   |
| 4400  | 3,39     | 3,69    | -1,09 | 0,03280 | 0,408 | 237462_at       | Transcribed locus                                           | -           |
| 4840  | 7,14     | 7,79    | -1,09 | 0,03690 | 0,417 | 215841_at       | Guanylate cyclase activator 1B (retina)                     | GUCA1B      |
| 5781  | 5,84     | 6,37    | -1,09 | 0,04654 | 0,440 | 1563324_at      | Hypothetical protein LOC389457                              | LOC389457   |
| 3841  | 4,94     | 5,39    | -1,09 | 0,02805 | 0,399 | 211803_at       | Cyclin-dependent kinase 2                                   | CDK2        |
| 1655  | 4,76     | 5,19    | -1,09 | 0,01045 | 0,345 | 215110_at       | Mannose-binding lectin (protein A) 1, pseudogene 1          | MBL1P1      |
| 2983  | 3,70     | 4,03    | -1,09 | 0,02097 | 0,384 | 237150_at       | Transcribed locus                                           | -           |
| 1379  | 4,67     | 5,10    | -1,09 | 0,00830 | 0,329 | 1552854_a_at    | Hypothetical protein FLJ32784                               | FLJ32784    |
| 3356  | 4,55     | 4,96    | -1,09 | 0,02383 | 0,388 | 241259_at       | GRB2-associated binding protein 3                           | GAB3        |
| 4532  | 4,42     | 4,82    | -1,09 | 0,03421 | 0,412 | 229565_x_at     | T-box 3 (ulnar mammary syndrome)                            | TBX3        |
| 1080  | 5,58     | 6,08    | -1,09 | 0,00632 | 0,319 | 1557702_at      | cDNA clone IMAGE:5265308                                    | -           |
| 3781  | 4,42     | 4,82    | -1,09 | 0,02752 | 0,398 | 231314_at       | Similar to XP_530643.1                                      | -           |
| 615   | 6,80     | 7,41    | -1,09 | 0,00348 | 0,308 | 1561976_at      | Chromosome 1 open reading frame 167                         | C1orf167    |
| 4062  | 9,24     | 10,1    | -1,09 | 0,02980 | 0,401 | 242373_at       | Transcribed locus                                           | -           |
| 2809  | 5,24     | 5,71    | -1,09 | 0,01954 | 0,380 | 238248_at       | Uromodulin (uromucoid, Tamm-Horsfall glycoprotein)          | UMOD        |
| 3751  | 3,46     | 3,77    | -1,09 | 0,02728 | 0,397 | 224238_at       | -                                                           | -           |
| 1392  | 2,62     | 2,85    | -1,09 | 0,00842 | 0,330 | 1557030_at      | GRB2-associated binding protein 1                           | GAB1        |
| 2302  | 3,79     | 4,13    | -1,09 | 0,01529 | 0,363 | 232506_s_at     | Chromosome 15 open reading frame 41                         | C15orf41    |
| 1449  | 6,68     | 7,28    | -1,09 | 0,00883 | 0,333 | 217450_at       | -                                                           | -           |
| 2059  | 23,7     | 25,8    | -1,09 | 0,01343 | 0,356 | 1562026_at      | WNK lysine deficient protein kinase 2                       | WNK2        |
| 4718  | 4,18     | 4,55    | -1,09 | 0,03570 | 0,413 | 1566123_at      | Fatty acid binding protein 6, ileal (gastrotropin)          | FABP6       |
| 2018  | 4,44     | 4,84    | -1,09 | 0,01317 | 0,355 | 238088_at       | cDNA clone IMAGE:5259414                                    | -           |
| 4244  | 4,50     | 4,91    | -1,09 | 0,03149 | 0,406 | 239356_at       | Clone IMAGE:1257951, mRNA sequence                          | -           |
| 5880  | 3,66     | 3,99    | -1,09 | 0,04754 | 0,442 | 243517_at       | -                                                           | -           |

| Index | Mutated* | Normal* | FC    | P value | FDR** | Probe set    | Description                                                    | Gene symbol |
|-------|----------|---------|-------|---------|-------|--------------|----------------------------------------------------------------|-------------|
| 3018  | 4,22     | 4,60    | -1,09 | 0,02127 | 0,385 | 1563316_at   | Clone IMAGE:5748207, mRNA                                      | -           |
| 4466  | 4,40     | 4,79    | -1,09 | 0,03355 | 0,411 | 207213_s_at  | Ubiquitin specific peptidase 2                                 | USP2        |
| 3889  | 6,84     | 7,45    | -1,09 | 0,02843 | 0,399 | 230059_at    | Deformed epidermal autoregulatory factor 1 (Drosophila)        | DEAF1       |
| 4478  | 5,68     | 6,19    | -1,09 | 0,03367 | 0,411 | 243975_at    | Clone IMAGE:5763888, mRNA                                      | -           |
| 2221  | 4,52     | 4,92    | -1,09 | 0,01474 | 0,363 | 208046_at    | Histone cluster 1, H4a                                         | HIST1H4A    |
| 4804  | 6,32     | 6,88    | -1,09 | 0,03647 | 0,415 | 1566622_at   | cDNA DKFZp667F0113                                             | -           |
| 2612  | 4,28     | 4,66    | -1,09 | 0,01774 | 0,371 | 242179_s_at  | Tetraspanin 16                                                 | TSPAN16     |
| 5911  | 6,26     | 6,82    | -1,09 | 0,04793 | 0,443 | 221105_at    | -                                                              | -           |
| 5146  | 14,0     | 15,2    | -1,09 | 0,03962 | 0,421 | 224100_s_at  | Dihydropyrimidinase-like 5                                     | DPYSL5      |
| 1929  | 3,93     | 4,28    | -1,09 | 0,01257 | 0,355 | 1555729_a_at | CD209 molecule                                                 | CD209       |
| 1943  | 5,16     | 5,62    | -1,09 | 0,01267 | 0,355 | 210753_s_at  | EPH receptor B1                                                | EPHB1       |
| 4172  | 3,36     | 3,66    | -1,09 | 0,03084 | 0,404 | 221886_at    | DENN/MADD domain containing 2A                                 | DENND2A     |
| 6063  | 5,67     | 6,17    | -1,09 | 0,04944 | 0,446 | 221707_s_at  | Vacuolar protein sorting 53 homolog (S. cerevisiae)            | VPS53       |
| 3911  | 5,58     | 6,08    | -1,09 | 0,02855 | 0,399 | 1566039_a_at | Hypothetical gene supported by BC036933                        | LOC401220   |
| 3179  | 5,68     | 6,18    | -1,09 | 0,02254 | 0,387 | 1565671_a_at | Hypothetical gene supported by NM_001531                       | LOC391142   |
| 3435  | 6,73     | 7,33    | -1,09 | 0,02458 | 0,391 | 1560935_s_at | Hypothetical protein LOC284669                                 | LOC284669   |
| 3181  | 4,24     | 4,62    | -1,09 | 0,02255 | 0,387 | 1555988_a_at | Hypothetical protein LOC126536                                 | LOC126536   |
| 5166  | 2,85     | 3,10    | -1,09 | 0,03981 | 0,421 | 1565833_at   | -                                                              | -           |
| 3311  | 11,0     | 12,0    | -1,09 | 0,02355 | 0,388 | 215487_x_at  | Hypothetical gene supported by BC042812                        | LOC728882   |
| 1846  | 3,01     | 3,28    | -1,09 | 0,01189 | 0,352 | 206884_s_at  | Sciellin                                                       | SCEL        |
| 2620  | 3,96     | 4,32    | -1,09 | 0,01781 | 0,371 | 244606_at    | ATPase, Na+/K+ transporting, alpha 1 polypeptide               | ATP1A1      |
| 5367  | 3,59     | 3,91    | -1,09 | 0,04214 | 0,429 | 241121_at    | Transcribed locus                                              | -           |
| 5720  | 3,21     | 3,50    | -1,09 | 0,04580 | 0,438 | 224045_x_at  | Chromosome 18 open reading frame 2                             | C18orf2     |
| 4374  | 3,55     | 3,86    | -1,09 | 0,03253 | 0,407 | 237805_at    | Hypothetical protein LOC729296                                 | LOC729296   |
| 2756  | 3,54     | 3,86    | -1,09 | 0,01910 | 0,379 | 237375_at    | Similar to XP_530528.1                                         | -           |
| 3482  | 5,25     | 5,71    | -1,09 | 0,02500 | 0,392 | 207990_x_at  | Acrosomal vesicle protein 1                                    | ACRV1       |
| 2062  | 3,39     | 3,69    | -1,09 | 0,01345 | 0,356 | 1562941_at   | cDNA clone IMAGE:5288253                                       | -           |
| 2830  | 3,87     | 4,21    | -1,09 | 0,01974 | 0,381 | 206603_at    | Solute carrier family 2, member 4                              | SLC2A4      |
| 3048  | 3,12     | 3,40    | -1,09 | 0,02146 | 0,385 | 1570284_x_at | Clone IMAGE:4696056, mRNA                                      | -           |
| 3683  | 31,2     | 34,0    | -1,09 | 0,02659 | 0,395 | 231792_at    | Myosin light chain kinase 2, skeletal muscle                   | MYLK2       |
| 5729  | 5,32     | 5,79    | -1,09 | 0,04595 | 0,438 | 1563255_at   | Hypothetical protein LOC728883                                 | LOC728883   |
| 5117  | 9,53     | 10,4    | -1,09 | 0,03940 | 0,421 | 207185_at    | Solute carrier family 10, member 1                             | SLC10A1     |
| 6019  | 4,33     | 4,71    | -1,09 | 0,04899 | 0,445 | 243425_at    | Transcribed locus                                              | -           |
| 5100  | 3,91     | 4,25    | -1,09 | 0,03923 | 0,420 | 241048_at    | Transcribed locus                                              | -           |
| 3591  | 3,99     | 4,34    | -1,09 | 0,02591 | 0,394 | 206244_at    | Complement component (3b/4b) receptor 1 (Knops blood group)    | CR1         |
| 3250  | 20,0     | 21,7    | -1,09 | 0,02307 | 0,388 | 1556747_a_at | cDNA FLJ39784 fis, clone SPLEN2002314                          | -           |
| 5286  | 4,52     | 4,92    | -1,09 | 0,04112 | 0,425 | 231668_x_at  | Immunoglobulin heavy constant gamma 1 (G1m marker)             | IGHG1       |
| 5201  | 8,31     | 9,05    | -1,09 | 0,04011 | 0,422 | 1561336_at   | Deoxyribonuclease I-like 3                                     | DNASE1L3    |
| 5797  | 24,2     | 26,4    | -1,09 | 0,04677 | 0,441 | 1557964_at   | Eukaryotic translation initiation factor 4 gamma, 2            | EIF4G2      |
| 2120  | 3,70     | 4,03    | -1,09 | 0,01391 | 0,359 | 230953_at    | cDNA clone IMAGE:4824446                                       | -           |
| 4753  | 6,22     | 6,77    | -1,09 | 0,03602 | 0,414 | 1562433_at   | Hypothetical protein FLJ10489                                  | FLJ10489    |
| 4064  | 3,89     | 4,23    | -1,09 | 0,02981 | 0,401 | 1570653_at   | Similar to v-Myb myeloblastosis viral oncogene homolog (avian) | -           |
| 2478  | 7,01     | 7,63    | -1,09 | 0,01669 | 0,367 | 234195_at    | cDNA FLJ22426 fis, clone HRC08780                              | -           |
| 3283  | 4,04     | 4,40    | -1,09 | 0,02339 | 0,388 | 1568913_at   | NOL1/NOP2/Sun domain family, member 3                          | NSUN3       |
| 3128  | 3,35     | 3,64    | -1,09 | 0,02218 | 0,387 | 1567078_x_at | -                                                              | -           |
| 1843  | 4,08     | 4,44    | -1,09 | 0,01185 | 0,351 | 1555000_at   | OK/SW-CL.36                                                    | -           |
| 4152  | 4,41     | 4,80    | -1,09 | 0,03063 | 0,403 | 1556426_at   | Hexosaminidase A (alpha polypeptide)                           | HEXA        |
| 5501  | 3,63     | 3,95    | -1,09 | 0,04354 | 0,433 | 1564491_at   | Chromosome X open reading frame 18                             | CXorf18     |
| 1759  | 3,18     | 3,46    | -1,09 | 0,01122 | 0,348 | 236729_at    | Caspase 3, apoptosis-related cysteine peptidase                | CASP3       |
| 4598  | 4,37     | 4,75    | -1,09 | 0,03477 | 0,412 | 235813_at    | cDNA FLJ46701 fis, clone TRACH3014063                          | -           |
| 5902  | 7,87     | 8,56    | -1,09 | 0,04783 | 0,443 | 238194_at    | Transcribed locus                                              | -           |
| 944   | 4,37     | 4,75    | -1,09 | 0,00542 | 0,313 | 1562943_at   | Clone IMAGE:5742085, mRNA                                      | -           |
| 6081  | 5,83     | 6,34    | -1,09 | 0,04965 | 0,446 | 219845_at    | BARX homeobox 1                                                | BARX1       |
| 4117  | 15,7     | 17,1    | -1,09 | 0,03027 | 0,402 | 1556397_at   | cDNA FLJ37122 fis, clone BRACE2022448                          | -           |
| 966   | 3,23     | 3,52    | -1,09 | 0,00559 | 0,315 | 1562432_at   | cDNA clone IMAGE:4794272                                       | -           |
| 3189  | 3,76     | 4,09    | -1,09 | 0,02260 | 0,387 | 217359_s_at  | Neural cell adhesion molecule 1                                | NCAM1       |
| 3625  | 4,12     | 4,48    | -1,09 | 0,02617 | 0,395 | 240790_at    | Transcribed locus                                              | -           |

| Index | Mutated* | Normal* | FC    | P value | FDR** | Probe set    | Description                                                     | Gene symbol |
|-------|----------|---------|-------|---------|-------|--------------|-----------------------------------------------------------------|-------------|
| 3229  | 5,48     | 5,96    | -1,09 | 0,02290 | 0,388 | 239929_at    | Hypothetical protein FLJ32569                                   | FLJ32569    |
| 6049  | 4,93     | 5,36    | -1,09 | 0,04929 | 0,445 | 1553323_a_at | Cation channel, sperm associated 2                              | CATSPER2    |
| 5024  | 4,06     | 4,41    | -1,09 | 0,03863 | 0,420 | 1570049_at   | Clone IMAGE:5176619, mRNA                                       | -           |
| 2998  | 3,70     | 4,02    | -1,09 | 0,02111 | 0,385 | 1553241_at   | -                                                               | -           |
| 5680  | 11,3     | 12,3    | -1,09 | 0,04535 | 0,436 | 207784_at    | Arylsulfatase D                                                 | ARSD        |
| 3647  | 20,2     | 21,9    | -1,09 | 0,02635 | 0,395 | 1566502_at   | cDNA DKFZp434B049                                               | -           |
| 5468  | 5,10     | 5,55    | -1,09 | 0,04320 | 0,432 | 240872_at    | Transcribed locus                                               | -           |
| 2406  | 4,88     | 5,31    | -1,09 | 0,01608 | 0,365 | 1560509_at   | cDNA DKFZp547H194                                               | -           |
| 3824  | 8,66     | 9,41    | -1,09 | 0,02792 | 0,399 | 234549_at    | cDNA DKFZp586G1917                                              | -           |
| 4921  | 11,7     | 12,7    | -1,09 | 0,03770 | 0,419 | 1557342_a_at | Hypothetical protein LOC150381                                  | LOC150381   |
| 4396  | 53,3     | 57,9    | -1,09 | 0,03277 | 0,407 | 1556291_at   | cDNA DKFZp564N2472                                              | -           |
| 1853  | 3,05     | 3,32    | -1,09 | 0,01194 | 0,352 | 229935_s_at  | -                                                               | -           |
| 4661  | 41,4     | 45,0    | -1,09 | 0,03519 | 0,413 | 91920_at     | Brevican                                                        | BCAN        |
| 6053  | 5,31     | 5,77    | -1,09 | 0,04937 | 0,446 | 1566476_at   | -                                                               | -           |
| 5959  | 3,73     | 4,05    | -1,09 | 0,04837 | 0,444 | 1564051_at   | -                                                               | -           |
| 2278  | 4,01     | 4,36    | -1,09 | 0,01515 | 0,363 | 230594_at    | Transcribed locus                                               | -           |
| 2516  | 3,13     | 3,40    | -1,09 | 0,01695 | 0,368 | 1553299_at   | Hypothetical protein FLJ31401                                   | -           |
| 5858  | 4,06     | 4,41    | -1,09 | 0,04737 | 0,442 | 216245_at    | Interleukin 1 receptor antagonist                               | IL1RN       |
| 5407  | 3,47     | 3,77    | -1,09 | 0,04244 | 0,429 | 244837_at    | -                                                               | -           |
| 5757  | 3,80     | 4,13    | -1,09 | 0,04622 | 0,439 | 1557446_x_at | Triggering receptor expressed on myeloid cells-like 3           | TREML3      |
| 4494  | 3,60     | 3,91    | -1,09 | 0,03380 | 0,411 | 241190_at    | Transcribed locus                                               | -           |
| 4538  | 3,66     | 3,98    | -1,09 | 0,03429 | 0,412 | 236842_at    | cDNA FLJ36110 fis, clone TESTI2021939                           | -           |
| 2386  | 3,43     | 3,73    | -1,09 | 0,01591 | 0,364 | 1560309_s_at | Full length insert cDNA clone YP59A09                           | -           |
| 922   | 3,91     | 4,25    | -1,09 | 0,00531 | 0,313 | 210384_at    | Protein arginine methyltransferase 2                            | PRMT2       |
| 4597  | 12,8     | 13,9    | -1,09 | 0,03477 | 0,412 | 206657_s_at  | Myogenic differentiation 1                                      | MYOD1       |
| 4150  | 5,21     | 5,66    | -1,09 | 0,03062 | 0,403 | 227831_at    | Chromosome 9 open reading frame 5                               | C9orf5      |
| 3554  | 4,06     | 4,41    | -1,09 | 0,02562 | 0,394 | 231344_at    | Transcribed locus                                               | -           |
| 1919  | 3,67     | 3,99    | -1,09 | 0,01251 | 0,355 | 233671_at    | cDNA FLJ11179 fis, clone PLACE1007450                           | -           |
| 1551  | 3,59     | 3,90    | -1,09 | 0,00956 | 0,337 | 211349_at    | Solute carrier family 15, member 1                              | SLC15A1     |
| 3052  | 4,45     | 4,84    | -1,09 | 0,02148 | 0,385 | 1569849_at   | cDNA clone IMAGE:4838370                                        | -           |
| 6005  | 6,85     | 7,44    | -1,09 | 0,04880 | 0,444 | 234708_at    | Single-strand-selective monofunctional uracil-DNA glycosylase 1 | SMUG1       |
| 6028  | 4,36     | 4,74    | -1,09 | 0,04903 | 0,445 | 238270_x_at  | -                                                               | -           |
| 1672  | 3,89     | 4,23    | -1,09 | 0,01055 | 0,345 | 1561143_at   | Full length insert cDNA clone ZD46F01                           | -           |
| 5601  | 14,7     | 15,9    | -1,09 | 0,04468 | 0,436 | 216439_at    | Tyrosine kinase, non-receptor, 2                                | TNK2        |
| 4566  | 12,4     | 13,4    | -1,09 | 0,03452 | 0,412 | 238201_at    | Transcribed locus                                               | -           |
| 3946  | 3,63     | 3,94    | -1,09 | 0,02882 | 0,399 | 240796_at    | Transcribed locus                                               | -           |
| 2780  | 3,25     | 3,53    | -1,09 | 0,01930 | 0,380 | 1560810_at   | Clone IMAGE:5745158, mRNA                                       | -           |
| 2614  | 4,17     | 4,53    | -1,09 | 0,01775 | 0,371 | 1554030_at   | Arylsulfatase B                                                 | ARSB        |
| 5699  | 3,45     | 3,75    | -1,09 | 0,04564 | 0,438 | 237912_at    | -                                                               | -           |
| 5899  | 10,8     | 11,7    | -1,09 | 0,04776 | 0,443 | 206152_at    | Centaurin, gamma 1                                              | CENTG1      |
| 4589  | 4,15     | 4,50    | -1,09 | 0,03471 | 0,412 | 232829_at    | Olfactory receptor, family 52, subfamily K, member 3 pseudogene | OR52K3P     |
| 3492  | 3,93     | 4,27    | -1,09 | 0,02510 | 0,392 | 239206_at    | Complement component (3b/4b) receptor 1-like                    | CR1L        |
| 5565  | 4,41     | 4,78    | -1,09 | 0,04430 | 0,435 | 217433_at    | Transforming, acidic coiled-coil containing protein 1           | TACC1       |
| 5450  | 5,71     | 6,20    | -1,09 | 0,04299 | 0,431 | 1561218_s_at | Hypothetical protein LOC728099                                  | LOC728099   |
| 3767  | 4,53     | 4,91    | -1,09 | 0,02737 | 0,397 | 1566737_at   | HCG2036596 protein                                              | -           |
| 5958  | 3,91     | 4,24    | -1,09 | 0,04835 | 0,444 | 1564202_at   | cDNA FLJ38820 fis, clone LIVER2008473                           | -           |
| 5175  | 3,69     | 4,01    | -1,09 | 0,03987 | 0,421 | 1560698_a_at | Hypothetical protein LOC283392                                  | LOC283392   |
| 4276  | 4,14     | 4,50    | -1,09 | 0,03178 | 0,406 | 1555603_at   | B melanoma antigen                                              | BAGE        |
| 5705  | 5,34     | 5,79    | -1,09 | 0,04569 | 0,438 | 230969_at    | LOC374973 protein                                               | LOC374973   |
| 5912  | 4,89     | 5,31    | -1,09 | 0,04794 | 0,443 | 234744_x_at  | -                                                               | -           |
| 2931  | 6,31     | 6,85    | -1,09 | 0,02055 | 0,383 | 214571_at    | Fibroblast growth factor 3                                      | FGF3        |
| 5113  | 6,33     | 6,88    | -1,09 | 0,03937 | 0,421 | 211389_x_at  | Killer cell immunoglobulin-like receptor 3DS1                   | KIR3DS1     |
| 5382  | 8,32     | 9,03    | -1,09 | 0,04219 | 0,429 | 243670_at    | Transcribed locus                                               | -           |
| 4348  | 4,02     | 4,36    | -1,09 | 0,03238 | 0,407 | 237721_s_at  | Ankyrin repeat and SOCS box-containing 4                        | ASB4        |
| 1426  | 3,39     | 3,68    | -1,09 | 0,00865 | 0,331 | 206285_at    | Nephronophthisis 1 (juvenile)                                   | NPHP1       |
| 3495  | 3,60     | 3,91    | -1,09 | 0,02513 | 0,392 | 238073_at    | -                                                               | -           |
| 2727  | 4,67     | 5,07    | -1,09 | 0,01877 | 0,376 | 241037_at    | -                                                               | -           |

| Index | Mutated* | Normal* | FC    | P value | FDR** | Probe set    | Description                                             | Gene symbol      |
|-------|----------|---------|-------|---------|-------|--------------|---------------------------------------------------------|------------------|
| 3826  | 6,05     | 6,56    | -1,09 | 0,02793 | 0,399 | 233781_s_at  | RAP1 interacting factor homolog (yeast)                 | <i>RIF1</i>      |
| 4783  | 54,5     | 59,2    | -1,09 | 0,03627 | 0,414 | 220962_s_at  | Peptidyl arginine deiminase, type I                     | <i>PADI1</i>     |
| 4513  | 14,7     | 15,9    | -1,09 | 0,03402 | 0,412 | 1559675_at   | -                                                       | -                |
| 6030  | 12,5     | 13,6    | -1,09 | 0,04906 | 0,445 | 1557022_at   | cDNA clone IMAGE:5298883                                | -                |
| 5986  | 5,36     | 5,82    | -1,09 | 0,04863 | 0,444 | 1553350_at   | Family with sequence similarity 123C                    | <i>FAM123C</i>   |
| 2436  | 2,69     | 2,92    | -1,09 | 0,01628 | 0,365 | 1568840_at   | WD repeats and SOF1 domain containing                   | <i>WDSOF1</i>    |
| 3187  | 4,31     | 4,68    | -1,09 | 0,02260 | 0,387 | 1558856_at   | DMRT-like family A2                                     | <i>DMRTA2</i>    |
| 5586  | 5,57     | 6,04    | -1,08 | 0,04455 | 0,436 | 220515_at    | Dual specificity phosphatase 21                         | <i>DUSP21</i>    |
| 461   | 3,00     | 3,26    | -1,08 | 0,00245 | 0,288 | 1565840_at   | cDNA FLJ35990 fis, clone TESTI2014415                   | -                |
| 5703  | 4,50     | 4,88    | -1,08 | 0,04565 | 0,438 | 208275_x_at  | Undifferentiated embryonic cell transcription factor 1  | <i>UTF1</i>      |
| 5352  | 4,25     | 4,61    | -1,08 | 0,04198 | 0,429 | 241007_at    | Transcribed locus                                       | -                |
| 1646  | 3,69     | 4,00    | -1,08 | 0,01036 | 0,344 | 1566739_at   | Phospholipase C, epsilon 1                              | <i>PLCE1</i>     |
| 3740  | 3,77     | 4,09    | -1,08 | 0,02722 | 0,397 | 243727_at    | Copine VIII                                             | <i>CPNE8</i>     |
| 4194  | 5,85     | 6,35    | -1,08 | 0,03098 | 0,404 | 230010_at    | KIAA1853 protein                                        | <i>KIAA1853</i>  |
| 5560  | 8,10     | 8,79    | -1,08 | 0,04426 | 0,435 | 244012_x_at  | -                                                       | -                |
| 6076  | 5,31     | 5,76    | -1,08 | 0,04959 | 0,446 | 230574_at    | -                                                       | -                |
| 2655  | 3,10     | 3,36    | -1,08 | 0,01811 | 0,373 | 215663_at    | Muscleblind-like (Drosophila)                           | <i>MBNL1</i>     |
| 1993  | 3,59     | 3,89    | -1,08 | 0,01303 | 0,355 | 1560771_at   | cDNA FLJ36254 fis, clone THYMU2002157                   | -                |
| 4792  | 5,02     | 5,45    | -1,08 | 0,03633 | 0,415 | 1552991_at   | Olfactory receptor, family 5, subfamily P, member 2     | <i>OR5P2</i>     |
| 5277  | 4,54     | 4,93    | -1,08 | 0,04102 | 0,425 | 206281_at    | Adenylate cyclase activating polypeptide 1 (pituitary)  | <i>ADCYAP1</i>   |
| 1249  | 3,26     | 3,54    | -1,08 | 0,00741 | 0,325 | 211341_at    | POU class 4 homeobox 1                                  | <i>POU4F1</i>    |
| 5584  | 4,36     | 4,72    | -1,08 | 0,04452 | 0,436 | 224181_at    | Chromosome 18 open reading frame 2                      | <i>C18orf2</i>   |
| 4190  | 3,60     | 3,90    | -1,08 | 0,03096 | 0,404 | 1555353_at   | Low density lipoprotein-related protein 1               | <i>LRP1</i>      |
| 4288  | 4,10     | 4,44    | -1,08 | 0,03185 | 0,406 | 216217_at    | Phospholipase C-like 2                                  | <i>PLCL2</i>     |
| 5393  | 4,01     | 4,35    | -1,08 | 0,04229 | 0,429 | 1556456_at   | Hypothetical FLJ39739                                   | <i>FLJ39739</i>  |
| 5927  | 6,12     | 6,63    | -1,08 | 0,04803 | 0,443 | 238216_at    | Clone IMAGE:4340526, mRNA                               | -                |
| 3743  | 4,40     | 4,77    | -1,08 | 0,02723 | 0,397 | 221271_at    | Interleukin 21                                          | <i>IL21</i>      |
| 3623  | 3,23     | 3,51    | -1,08 | 0,02616 | 0,395 | 217470_at    | cDNA DKFZp434F1011                                      | -                |
| 4612  | 17,0     | 18,4    | -1,08 | 0,03483 | 0,412 | 216371_at    | -                                                       | -                |
| 3153  | 3,28     | 3,55    | -1,08 | 0,02237 | 0,387 | 239192_at    | Par-3 partitioning defective 3 homolog B (C. elegans)   | <i>PARD3B</i>    |
| 5591  | 12,1     | 13,1    | -1,08 | 0,04458 | 0,436 | 1553865_a_at | cDNA DKFZp761H2121                                      | -                |
| 2751  | 3,75     | 4,07    | -1,08 | 0,01903 | 0,378 | 1562923_at   | cDNA clone IMAGE:4838328                                | -                |
| 827   | 4,41     | 4,78    | -1,08 | 0,00472 | 0,312 | 1562974_at   | cDNA clone IMAGE:5302821                                | -                |
| 1083  | 2,81     | 3,05    | -1,08 | 0,00634 | 0,319 | 1563392_at   | Chromosome 21, Down syndrome critical region transcript | -                |
| 5009  | 10,8     | 11,7    | -1,08 | 0,03848 | 0,420 | 217341_at    | -                                                       | -                |
| 2507  | 3,51     | 3,81    | -1,08 | 0,01685 | 0,367 | 231483_at    | Similar to XP_001149380.1                               | -                |
| 3611  | 31,4     | 34,1    | -1,08 | 0,02606 | 0,394 | 1556718_s_at | cDNA FLJ35483 fis, clone SMINT2008277                   | -                |
| 5603  | 4,00     | 4,33    | -1,08 | 0,04471 | 0,436 | 1556490_a_at | Hypothetical LOC388946                                  | <i>LOC388946</i> |
| 394   | 2,89     | 3,13    | -1,08 | 0,00208 | 0,285 | 1570486_at   | SRY (sex determining region Y)-box 6                    | <i>SOX6</i>      |
| 1203  | 7,40     | 8,02    | -1,08 | 0,00712 | 0,323 | 1553863_at   | Chromosome 10 open reading frame 64                     | <i>C10orf64</i>  |
| 3871  | 3,99     | 4,32    | -1,08 | 0,02828 | 0,399 | 1559065_a_at | C-type lectin superfamily 4, member G                   | <i>CLEC4G</i>    |
| 4738  | 5,52     | 5,98    | -1,08 | 0,03586 | 0,414 | 1565583_at   | Zinc finger and SCAN domain containing 5                | <i>ZSCAN5</i>    |
| 4594  | 4,66     | 5,05    | -1,08 | 0,03476 | 0,412 | 1564444_at   | cDNA FLJ40178 fis, clone TESTI2017932                   | -                |
| 5350  | 4,62     | 5,01    | -1,08 | 0,04196 | 0,429 | 1555048_a_at | Chromosome 21 open reading frame 29                     | <i>C21orf29</i>  |
| 4293  | 7,76     | 8,41    | -1,08 | 0,03192 | 0,406 | 1566535_at   | cDNA FLJ40701 fis, clone THYMU2025909                   | -                |
| 4725  | 4,58     | 4,96    | -1,08 | 0,03576 | 0,414 | 1555085_at   | -                                                       | -                |
| 986   | 3,60     | 3,90    | -1,08 | 0,00569 | 0,315 | 1555116_s_at | Solute carrier family 11, member 1                      | <i>SLC11A1</i>   |
| 5901  | 8,98     | 9,73    | -1,08 | 0,04780 | 0,443 | 1560409_at   | Clone IMAGE:5211852, mRNA                               | -                |
| 2460  | 3,98     | 4,32    | -1,08 | 0,01652 | 0,367 | 1565801_at   | cDNA clone IMAGE:4796818                                | -                |
| 3957  | 3,84     | 4,16    | -1,08 | 0,02890 | 0,399 | 1561099_at   | Hypothetical LOC642757                                  | <i>FLJ32756</i>  |
| 4850  | 4,33     | 4,69    | -1,08 | 0,03695 | 0,417 | 217507_at    | Solute carrier family 11, member 1                      | <i>SLC11A1</i>   |
| 5655  | 5,54     | 6,00    | -1,08 | 0,04510 | 0,436 | 235367_at    | Myopalladin                                             | <i>MYPN</i>      |
| 3469  | 13,4     | 14,5    | -1,08 | 0,02485 | 0,392 | 1564431_a_at | FLJ45224 protein                                        | <i>FLJ45224</i>  |
| 872   | 3,18     | 3,44    | -1,08 | 0,00504 | 0,313 | 207477_at    | -                                                       | -                |
| 5822  | 27,6     | 29,9    | -1,08 | 0,04704 | 0,442 | 1569679_at   | Cadherin-like 22                                        | <i>CDH22</i>     |
| 3107  | 6,35     | 6,88    | -1,08 | 0,02193 | 0,386 | 237203_at    | Clone IMAGE:4214313, mRNA                               | -                |
| 5048  | 3,98     | 4,31    | -1,08 | 0,03889 | 0,420 | 241679_at    | -                                                       | -                |



| Index | Mutated* | Normal* | FC    | P value | FDR** | Probe set    | Description                                                 | Gene symbol |
|-------|----------|---------|-------|---------|-------|--------------|-------------------------------------------------------------|-------------|
| 2827  | 4,86     | 5,27    | -1,08 | 0,01973 | 0,381 | 1556502_at   | cDNA clone IMAGE:4825100                                    | -           |
| 3963  | 5,60     | 6,07    | -1,08 | 0,02895 | 0,399 | 216790_at    | cDNA FLJ22812 fis, clone KAIA2955                           | -           |
| 5162  | 4,99     | 5,41    | -1,08 | 0,03978 | 0,421 | 207665_at    | ADAM metallopeptidase domain 21                             | ADAM21      |
| 4502  | 4,86     | 5,27    | -1,08 | 0,03388 | 0,411 | 1560832_at   | Clone IMAGE:4063532, mRNA                                   | -           |
| 3196  | 9,86     | 10,7    | -1,08 | 0,02265 | 0,387 | 220996_s_at  | Chromosome 1 open reading frame 14                          | C1orf14     |
| 2903  | 2,96     | 3,21    | -1,08 | 0,02041 | 0,383 | 234454_at    | -                                                           | -           |
| 4618  | 3,94     | 4,26    | -1,08 | 0,03485 | 0,412 | 1556200_a_at | Chromosome 10 open reading frame 90                         | C10orf90    |
| 4328  | 17,8     | 19,3    | -1,08 | 0,03221 | 0,407 | 1558705_at   | Atonal homolog 8 (Drosophila)                               | ATOH8       |
| 4397  | 4,77     | 5,17    | -1,08 | 0,03278 | 0,407 | 233606_at    | cDNA FLJ11424 fis, clone HEMBA1001026                       | -           |
| 5719  | 7,79     | 8,44    | -1,08 | 0,04580 | 0,438 | 1566602_at   | RNA pseudouridylylase synthase domain containing 3          | RPUSD3      |
| 672   | 2,63     | 2,85    | -1,08 | 0,00386 | 0,308 | 231613_at    | MAP/microtubule affinity-regulating kinase 1                | MARK1       |
| 6031  | 3,72     | 4,03    | -1,08 | 0,04909 | 0,445 | 230631_s_at  | Full-length cDNA clone CSODI051YA02                         | -           |
| 2928  | 3,47     | 3,76    | -1,08 | 0,02053 | 0,383 | 220984_s_at  | Solute carrier organic anion transporter family, member 5A1 | SLCO5A1     |
| 3634  | 3,48     | 3,77    | -1,08 | 0,02628 | 0,395 | 1566339_at   | Small nucleolar RNA, C/D box 8                              | SNORD8      |
| 2857  | 4,90     | 5,30    | -1,08 | 0,02006 | 0,383 | 207924_x_at  | Paired box 8                                                | PAX8        |
| 1920  | 6,80     | 7,37    | -1,08 | 0,01251 | 0,355 | 1569887_a_at | Hypothetical protein LOC286135                              | LOC286135   |
| 1469  | 3,30     | 3,58    | -1,08 | 0,00898 | 0,334 | 217380_s_at  | Clone DT1P1A11 Mrna                                         | -           |
| 1923  | 3,86     | 4,18    | -1,08 | 0,01252 | 0,355 | 1559559_at   | Chromosome 9 open reading frame 79                          | C9orf79     |
| 5513  | 5,14     | 5,56    | -1,08 | 0,04367 | 0,433 | 207503_at    | T-complex 10 (mouse)                                        | TCP10       |
| 5155  | 4,31     | 4,67    | -1,08 | 0,03969 | 0,421 | 234357_at    | cDNA FLJ13578 fis, clone PLACE1008757                       | -           |
| 1628  | 3,24     | 3,51    | -1,08 | 0,01025 | 0,344 | 244602_at    | Transcribed locus                                           | -           |
| 2679  | 3,62     | 3,92    | -1,08 | 0,01833 | 0,374 | 1564337_at   | cDNA FLJ35701 fis, clone SPLEN2020007                       | -           |
| 3339  | 6,59     | 7,13    | -1,08 | 0,02371 | 0,388 | 243095_at    | Transcribed locus                                           | -           |
| 2421  | 5,87     | 6,35    | -1,08 | 0,01618 | 0,365 | 1555545_at   | Kallikrein-related peptidase 2                              | KLK2        |
| 5294  | 6,23     | 6,74    | -1,08 | 0,04123 | 0,426 | 229621_x_at  | Early B-cell factor 3                                       | EBF3        |
| 2329  | 8,39     | 9,08    | -1,08 | 0,01551 | 0,364 | 1553837_at   | Phosphoglycerate mutase family member 5                     | PGAM5       |
| 4646  | 10,3     | 11,1    | -1,08 | 0,03505 | 0,412 | 217637_at    | Full length insert cDNA clone ZE05A03                       | -           |
| 1974  | 3,70     | 4,00    | -1,08 | 0,01291 | 0,355 | 231105_at    | Similar to XP_001132401.1                                   | -           |
| 2699  | 3,50     | 3,78    | -1,08 | 0,01851 | 0,375 | 244138_at    | Hypothetical protein LOC728904                              | LOC728904   |
| 4635  | 8,21     | 8,89    | -1,08 | 0,03496 | 0,412 | 229239_x_at  | Solute carrier organic anion transporter family, member 4A1 | SLCO4A1     |
| 5662  | 2,88     | 3,12    | -1,08 | 0,04519 | 0,436 | 217443_at    | cDNA DKFZp434F104                                           | -           |
| 5346  | 5,77     | 6,24    | -1,08 | 0,04191 | 0,429 | 241476_at    | Similar to XP_001130933.1                                   | -           |
| 2343  | 5,28     | 5,72    | -1,08 | 0,01564 | 0,364 | 222965_at    | Hypothetical protein PRO2214                                | PRO2214     |
| 4387  | 3,16     | 3,42    | -1,08 | 0,03268 | 0,407 | 214382_at    | Unc-93 homolog A (C. elegans)                               | UNC93A      |
| 4912  | 4,13     | 4,47    | -1,08 | 0,03757 | 0,418 | 1556960_a_at | HCG2007354 protein                                          | -           |
| 2835  | 9,22     | 9,98    | -1,08 | 0,01979 | 0,382 | 1554065_at   | Family with sequence similarity 125, member B               | FAM125B     |
| 5918  | 6,39     | 6,91    | -1,08 | 0,04797 | 0,443 | 216059_at    | Paired box 3                                                | PAX3        |
| 4630  | 4,45     | 4,81    | -1,08 | 0,03491 | 0,412 | 208247_at    | Chromosome 3 open reading frame 51                          | C3orf51     |
| 2967  | 3,79     | 4,10    | -1,08 | 0,02085 | 0,384 | 206446_s_at  | Elastase 2A                                                 | ELA2A       |
| 5556  | 4,01     | 4,34    | -1,08 | 0,04423 | 0,435 | 216223_at    | Carboxypeptidase N, polypeptide 2                           | CPN2        |
| 3521  | 8,25     | 8,93    | -1,08 | 0,02527 | 0,392 | 207500_at    | Caspase 5, apoptosis-related cysteine peptidase             | CASP5       |
| 4544  | 6,39     | 6,91    | -1,08 | 0,03434 | 0,412 | 214242_at    | Mannosidase, alpha, class 1A, member 2                      | MAN1A2      |
| 5351  | 3,57     | 3,86    | -1,08 | 0,04198 | 0,429 | 215249_at    | Ribosomal protein L35a                                      | RPL35A      |
| 5463  | 8,66     | 9,37    | -1,08 | 0,04314 | 0,432 | 240500_at    | -                                                           | -           |
| 5295  | 4,59     | 4,96    | -1,08 | 0,04124 | 0,426 | 1567358_at   | Neuron navigator 2                                          | NAV2        |
| 3650  | 5,95     | 6,43    | -1,08 | 0,02638 | 0,395 | 240716_at    | Tetratricopeptide repeat domain 23                          | TTC23       |
| 2532  | 4,48     | 4,85    | -1,08 | 0,01711 | 0,369 | 1566181_at   | cDNA FLJ20881 fis, clone ADKA03177                          | -           |
| 5614  | 9,43     | 10,2    | -1,08 | 0,04478 | 0,436 | 1553688_at   | Methyltransferase like 6                                    | METTL6      |
| 2981  | 5,18     | 5,60    | -1,08 | 0,02096 | 0,384 | 1555237_at   | cDNA clone IMAGE:4336144                                    | -           |
| 4140  | 3,58     | 3,87    | -1,08 | 0,03056 | 0,403 | 224136_at    | Mitogen-activated protein kinase 1                          | p41         |
| 4178  | 3,64     | 3,93    | -1,08 | 0,03089 | 0,404 | 237767_at    | FERM, RhoGEF (ARHGEF) and pleckstrin domain protein 1       | FARP1       |
| 5869  | 5,93     | 6,41    | -1,08 | 0,04743 | 0,442 | 243553_x_at  | Transcribed locus                                           | -           |
| 5866  | 3,92     | 4,24    | -1,08 | 0,04742 | 0,442 | 216946_at    | Major histocompatibility complex, class II, DO alpha        | HLA-DOA     |
| 2797  | 2,92     | 3,15    | -1,08 | 0,01943 | 0,380 | 1557739_at   | cDNA clone IMAGE:5298947                                    | -           |
| 5458  | 5,16     | 5,58    | -1,08 | 0,04312 | 0,432 | 1559049_a_at | BAH domain and coiled-coil containing 1                     | BAHCC1      |
| 5718  | 4,40     | 4,76    | -1,08 | 0,04580 | 0,438 | 232232_s_at  | Solute carrier family 22, member 16                         | SLC22A16    |
| 3456  | 3,20     | 3,45    | -1,08 | 0,02475 | 0,392 | 215958_at    | cDNA FLJ12003 fis, clone HEMBB1001537                       | -           |

| Index | Mutated* | Normal* | FC    | P value | FDR** | Probe set    | Description                                                | Gene symbol      |
|-------|----------|---------|-------|---------|-------|--------------|------------------------------------------------------------|------------------|
| 5881  | 13,6     | 14,7    | -1,08 | 0,04758 | 0,442 | 1553163_at   | ADP-ribosylhydrolase like 1                                | <i>ADPRHL1</i>   |
| 4376  | 3,45     | 3,73    | -1,08 | 0,03256 | 0,407 | 1561485_at   | IQ motif containing with AAA domain                        | <i>IQCA</i>      |
| 5795  | 4,59     | 4,96    | -1,08 | 0,04675 | 0,441 | 233738_at    | cDNA DKFZp566E1346                                         | -                |
| 4883  | 3,33     | 3,59    | -1,08 | 0,03734 | 0,418 | 1567076_at   | -                                                          | -                |
| 5874  | 4,51     | 4,88    | -1,08 | 0,04745 | 0,442 | 1569750_at   | cDNA clone IMAGE:4822123                                   | -                |
| 4002  | 3,32     | 3,58    | -1,08 | 0,02930 | 0,400 | 1570101_at   | cDNA clone IMAGE:5269204                                   | -                |
| 2527  | 2,71     | 2,93    | -1,08 | 0,01707 | 0,369 | 207901_at    | Interleukin 12B                                            | <i>IL12B</i>     |
| 707   | 3,23     | 3,49    | -1,08 | 0,00406 | 0,308 | 1569064_at   | Hypothetical LOC643338                                     | <i>LOC643338</i> |
| 3136  | 3,53     | 3,82    | -1,08 | 0,02223 | 0,387 | 1552929_at   | G protein-coupled receptor kinase 7                        | <i>GRK7</i>      |
| 4581  | 3,23     | 3,49    | -1,08 | 0,03461 | 0,412 | 244446_at    | cDNA clone IMAGE:5266114                                   | -                |
| 1764  | 2,79     | 3,01    | -1,08 | 0,01124 | 0,348 | 222966_at    | -                                                          | -                |
| 5736  | 3,67     | 3,97    | -1,08 | 0,04601 | 0,438 | 1560262_at   | Clone IMAGE:5751523, mRNA                                  | -                |
| 2264  | 3,55     | 3,83    | -1,08 | 0,01505 | 0,363 | 240431_at    | -                                                          | -                |
| 5323  | 5,29     | 5,71    | -1,08 | 0,04162 | 0,427 | 243094_at    | Chromosome 13 open reading frame 21                        | <i>C13orf21</i>  |
| 3410  | 3,95     | 4,27    | -1,08 | 0,02433 | 0,390 | 240477_at    | Transcribed locus                                          | -                |
| 995   | 3,01     | 3,25    | -1,08 | 0,00573 | 0,315 | 216313_at    | Protocadherin beta 17 pseudogene                           | <i>PCDHB17</i>   |
| 4746  | 2,97     | 3,20    | -1,08 | 0,03595 | 0,414 | 1563524_a_at | Chromosome 14 open reading frame 85                        | <i>C14orf85</i>  |
| 4472  | 5,73     | 6,19    | -1,08 | 0,03360 | 0,411 | 217005_at    | Low density lipoprotein receptor                           | <i>LDLR</i>      |
| 4464  | 4,70     | 5,07    | -1,08 | 0,03354 | 0,411 | 1560455_at   | Hypothetical protein LOC339166                             | <i>LOC339166</i> |
| 1791  | 3,48     | 3,76    | -1,08 | 0,01147 | 0,350 | 1567270_at   | -                                                          | -                |
| 6058  | 3,65     | 3,94    | -1,08 | 0,04941 | 0,446 | 220115_s_at  | Cadherin 10, type 2 (T2-Cadherin)                          | <i>CDH10</i>     |
| 3503  | 3,74     | 4,04    | -1,08 | 0,02517 | 0,392 | 202493_x_at  | Chorionic somatomammotropin hormone 1                      | <i>CSH1</i>      |
| 5485  | 5,28     | 5,70    | -1,08 | 0,04341 | 0,433 | 232526_at    | Inositol 1,4,5-trisphosphate 3-kinase B                    | <i>ITPKB</i>     |
| 5356  | 3,56     | 3,85    | -1,08 | 0,04201 | 0,429 | 1566861_at   | Hypothetical protein LOC145663                             | <i>LOC145663</i> |
| 4765  | 12,8     | 13,8    | -1,08 | 0,03611 | 0,414 | 1554752_a_at | cDNA clone IMAGE:3528357                                   | -                |
| 5616  | 6,13     | 6,62    | -1,08 | 0,04482 | 0,436 | 241515_at    | -                                                          | -                |
| 4886  | 3,48     | 3,75    | -1,08 | 0,03737 | 0,418 | 1566693_at   | cDNA FLJ20947 fis, clone ADSE01841                         | -                |
| 5433  | 4,83     | 5,22    | -1,08 | 0,04281 | 0,431 | 1555624_a_at | Slingshot homolog 1 (Drosophila)                           | <i>SSH1</i>      |
| 4638  | 2,89     | 3,12    | -1,08 | 0,03498 | 0,412 | 231781_s_at  | Leucine rich repeat containing 2                           | <i>LRRC2</i>     |
| 3844  | 3,09     | 3,34    | -1,08 | 0,02806 | 0,399 | 1553120_at   | Claspin homolog (Xenopus laevis)                           | <i>CLSPN</i>     |
| 5762  | 4,44     | 4,79    | -1,08 | 0,04629 | 0,439 | 1559561_at   | F-box protein, helicase, 18                                | <i>FBXO18</i>    |
| 4786  | 4,34     | 4,69    | -1,08 | 0,03629 | 0,415 | 1553844_a_at | Chromosome 10 open reading frame 67                        | <i>C10orf67</i>  |
| 5955  | 3,49     | 3,77    | -1,08 | 0,04831 | 0,444 | 211617_at    | Aldolase A, fructose-bisphosphate pseudogene 2             | <i>ALDOAP2</i>   |
| 1934  | 3,29     | 3,55    | -1,08 | 0,01261 | 0,355 | 220854_at    | -                                                          | -                |
| 6006  | 12,9     | 14,0    | -1,08 | 0,04881 | 0,444 | 217557_s_at  | Carboxypeptidase M                                         | <i>CPM</i>       |
| 6111  | 3,28     | 3,54    | -1,08 | 0,04987 | 0,446 | 1556081_at   | cDNA FLJ33441 fis, clone BRACE2021932                      | -                |
| 3618  | 4,73     | 5,10    | -1,08 | 0,02612 | 0,395 | 1559777_at   | cDNA FLJ32866 fis, clone TESTI2003718                      | -                |
| 1995  | 3,22     | 3,47    | -1,08 | 0,01304 | 0,355 | 241238_at    | Transcribed locus                                          | -                |
| 3576  | 3,07     | 3,31    | -1,08 | 0,02582 | 0,394 | 1561009_at   | Monoamine oxidase B                                        | <i>MAOB</i>      |
| 5385  | 3,99     | 4,30    | -1,08 | 0,04224 | 0,429 | 1568864_at   | Hypothetical protein MGC2752                               | <i>MGC2752</i>   |
| 5825  | 5,77     | 6,22    | -1,08 | 0,04706 | 0,442 | 233745_at    | cDNA FLJ34894 fis, clone NT2NE2017982                      | -                |
| 4643  | 3,98     | 4,29    | -1,08 | 0,03501 | 0,412 | 217632_at    | Guanine nucleotide binding protein-like 3 (nucleolar)-like | <i>GNL3L</i>     |
| 3581  | 12,5     | 13,5    | -1,08 | 0,02586 | 0,394 | 1553917_at   | Phosphatidylinositol-3-phosphate 5-kinase type III         | <i>PIP5K3</i>    |
| 2228  | 5,90     | 6,37    | -1,08 | 0,01480 | 0,363 | 1563488_at   | Transmembrane protein 132B                                 | <i>TMEM132B</i>  |
| 1752  | 2,83     | 3,05    | -1,08 | 0,01117 | 0,348 | 1566266_at   | Full length insert cDNA YQ80D07                            | -                |
| 3344  | 3,19     | 3,44    | -1,08 | 0,02375 | 0,388 | 207870_at    | A kinase (PRKA) anchor protein (yotiao) 9                  | <i>AKAP9</i>     |
| 5078  | 7,12     | 7,68    | -1,08 | 0,03906 | 0,420 | 1561702_at   | cDNA clone IMAGE:5268043                                   | -                |
| 5978  | 3,94     | 4,25    | -1,08 | 0,04854 | 0,444 | 222298_at    | cDNA FLJ41644 fis, clone FEBRA2009362                      | -                |
| 5420  | 4,40     | 4,75    | -1,08 | 0,04261 | 0,430 | 1563612_at   | -                                                          | -                |
| 5764  | 4,38     | 4,72    | -1,08 | 0,04631 | 0,439 | 222177_s_at  | SCAN domain containing 2                                   | <i>SCAND2</i>    |
| 5486  | 4,86     | 5,24    | -1,08 | 0,04341 | 0,433 | 207615_s_at  | Chromosome 16 open reading frame 3                         | <i>C16orf3</i>   |
| 2951  | 3,15     | 3,39    | -1,08 | 0,02072 | 0,384 | 235622_at    | Transcribed locus                                          | -                |
| 1085  | 3,29     | 3,54    | -1,08 | 0,00636 | 0,319 | 239460_at    | Cytochrome P450, family 19, subfamily A, polypeptide 1     | <i>CYP19A1</i>   |
| 5672  | 4,42     | 4,76    | -1,08 | 0,04527 | 0,436 | 1562691_at   | Clone IMAGE:5723690, mRNA                                  | -                |
| 5165  | 28,6     | 30,9    | -1,08 | 0,03980 | 0,421 | 204292_x_at  | Serine/threonine kinase 11                                 | <i>STK11</i>     |
| 5218  | 4,07     | 4,39    | -1,08 | 0,04034 | 0,423 | 214648_at    | Glutathione peroxidase 5                                   | <i>GPX5</i>      |
| 5808  | 3,88     | 4,18    | -1,08 | 0,04689 | 0,441 | 1561455_at   | Hypothetical protein LOC284294                             | <i>LOC284294</i> |

| Index | Mutated* | Normal* | FC    | P value | FDR** | Probe set    | Description                                                 | Gene symbol |
|-------|----------|---------|-------|---------|-------|--------------|-------------------------------------------------------------|-------------|
| 5298  | 7,28     | 7,84    | -1,08 | 0,04127 | 0,426 | 240584_at    | -                                                           | -           |
| 1797  | 4,05     | 4,37    | -1,08 | 0,01156 | 0,351 | 1553446_at   | Hypothetical protein FLJ37396                               | FLJ37396    |
| 4910  | 4,74     | 5,11    | -1,08 | 0,03755 | 0,418 | 1563143_at   | Clone IMAGE:5172510, mRNA                                   | -           |
| 4113  | 3,26     | 3,52    | -1,08 | 0,03023 | 0,402 | 1559970_at   | Hypothetical protein LOC730034                              | LOC730034   |
| 5062  | 4,08     | 4,40    | -1,08 | 0,03896 | 0,420 | 1564595_at   | Clone IMAGE:5745181, mRNA                                   | -           |
| 5152  | 5,68     | 6,12    | -1,08 | 0,03965 | 0,421 | 235403_at    | Transcribed locus                                           | -           |
| 3090  | 7,43     | 8,01    | -1,08 | 0,02179 | 0,385 | 211827_s_at  | Potassium voltage-gated channel subfamily D member 3        | KCND3       |
| 4165  | 4,03     | 4,34    | -1,08 | 0,03078 | 0,404 | 219841_at    | Activation-induced cytidine deaminase                       | AICDA       |
| 5790  | 3,83     | 4,12    | -1,08 | 0,04667 | 0,441 | 215830_at    | SH3 and multiple ankyrin repeat domains 2                   | SHANK2      |
| 1890  | 4,05     | 4,37    | -1,08 | 0,01225 | 0,355 | 215872_at    | -                                                           | -           |
| 5154  | 5,27     | 5,67    | -1,08 | 0,03967 | 0,421 | 205753_at    | C-reactive protein, pentraxin-related                       | CRP         |
| 3700  | 10,5     | 11,3    | -1,08 | 0,02676 | 0,395 | 1563641_a_at | Selectin ligand interactor cytoplasmic-1                    | SLIC1       |
| 4537  | 3,63     | 3,91    | -1,08 | 0,03429 | 0,412 | 233581_at    | Clone 24850 mRNA sequence                                   | -           |
| 2980  | 3,02     | 3,25    | -1,08 | 0,02096 | 0,384 | 240122_at    | DIRAS family, GTP-binding RAS-like 2                        | DIRAS2      |
| 4761  | 3,24     | 3,49    | -1,08 | 0,03609 | 0,414 | 206810_at    | Zinc finger protein 44                                      | ZNF44       |
| 4323  | 6,31     | 6,80    | -1,08 | 0,03218 | 0,407 | 1557981_at   | Ribosomal protein S9                                        | RPS9        |
| 655   | 3,40     | 3,66    | -1,08 | 0,00377 | 0,308 | 241421_at    | Transcribed locus                                           | -           |
| 3139  | 3,22     | 3,46    | -1,08 | 0,02226 | 0,387 | 1562750_at   | cDNA clone IMAGE:4751528                                    | -           |
| 5780  | 15,5     | 16,7    | -1,08 | 0,04653 | 0,440 | 229832_x_at  | SH3 domain and tetratricopeptide repeats 1                  | SH3TC1      |
| 2643  | 3,73     | 4,01    | -1,08 | 0,01802 | 0,373 | 1557314_at   | cDNA clone IMAGE:5303069                                    | -           |
| 5888  | 5,26     | 5,66    | -1,08 | 0,04763 | 0,442 | 208000_at    | GPI anchored molecule like protein                          | GML         |
| 5265  | 6,62     | 7,13    | -1,08 | 0,04089 | 0,425 | 1556369_a_at | Phosphorylase kinase, gamma 2 (testis)                      | PHKG2       |
| 4779  | 3,21     | 3,46    | -1,08 | 0,03623 | 0,414 | 217083_at    | Mitogen-activated protein kinase-activated protein kinase 5 | MAPKAPK5    |
| 4017  | 10,6     | 11,4    | -1,08 | 0,02942 | 0,400 | 214818_at    | Coiled-coil domain containing 57                            | CCDC57      |
| 2325  | 4,11     | 4,42    | -1,08 | 0,01547 | 0,364 | 237949_at    | Transcribed locus                                           | -           |
| 4168  | 4,33     | 4,67    | -1,08 | 0,03080 | 0,404 | 1560750_at   | Hypothetical protein LOC151121                              | LOC151121   |
| 3571  | 2,62     | 2,82    | -1,08 | 0,02580 | 0,394 | 1552522_at   | Tigger transposable element derived 4                       | TIGD4       |
| 3730  | 3,07     | 3,31    | -1,08 | 0,02708 | 0,397 | 1554887_at   | -                                                           | -           |
| 5739  | 8,88     | 9,56    | -1,08 | 0,04603 | 0,439 | 1562411_at   | MLCK protein                                                | MLCK        |
| 5430  | 12,1     | 13,1    | -1,08 | 0,04274 | 0,430 | 216337_at    | (clone Z146) retinal mRNA, 3' end and repeat region         | -           |
| 4330  | 4,40     | 4,73    | -1,08 | 0,03224 | 0,407 | 1558177_at   | Chromosome 14 open reading frame 83                         | C14orf83    |
| 5968  | 10,5     | 11,3    | -1,08 | 0,04847 | 0,444 | 1569496_s_at | Spondin 2, extracellular matrix protein                     | SPON2       |
| 5987  | 4,41     | 4,75    | -1,08 | 0,04865 | 0,444 | 1562687_x_at | cDNA FLJ20158 fis, clone COL08935                           | -           |
| 2259  | 3,13     | 3,37    | -1,08 | 0,01504 | 0,363 | 207672_at    | -                                                           | -           |
| 5142  | 5,29     | 5,69    | -1,08 | 0,03959 | 0,421 | 1556477_a_at | Hypothetical protein LOC283485                              | LOC283485   |
| 1988  | 2,92     | 3,14    | -1,08 | 0,01301 | 0,355 | 1553329_at   | Chromosome 7 open reading frame 45                          | C7orf45     |
| 2168  | 3,27     | 3,52    | -1,08 | 0,01434 | 0,361 | 234179_at    | cDNA FLJ23200 fis, clone KAI38871                           | -           |
| 3734  | 3,21     | 3,45    | -1,08 | 0,02712 | 0,397 | 240581_at    | Hypothetical LOC644135                                      | LOC644135   |
| 5594  | 5,55     | 5,97    | -1,08 | 0,04461 | 0,436 | 1554322_a_at | Histone deacetylase 4                                       | HDAC4       |
| 5200  | 3,59     | 3,86    | -1,08 | 0,04011 | 0,422 | 238713_at    | Transcribed locus                                           | -           |
| 2662  | 3,91     | 4,21    | -1,08 | 0,01818 | 0,373 | 1560590_s_at | Clone IMAGE:2905626, mRNA                                   | -           |
| 5343  | 8,37     | 9,00    | -1,08 | 0,04188 | 0,429 | 1553890_s_at | Hypothetical protein BC018697                               | LOC126147   |
| 2648  | 3,83     | 4,12    | -1,08 | 0,01804 | 0,373 | 1562541_at   | Hypothetical protein LOC285928                              | LOC285928   |
| 4903  | 2,96     | 3,18    | -1,08 | 0,03750 | 0,418 | 1569407_at   | cDNA clone IMAGE:4825059                                    | -           |
| 3082  | 3,48     | 3,74    | -1,08 | 0,02172 | 0,385 | 1559661_at   | Odz, odd Oz/ten-m homolog 3 (Drosophila)                    | ODZ3        |
| 4926  | 4,14     | 4,45    | -1,08 | 0,03779 | 0,419 | 1557404_at   | cDNA clone IMAGE:5266464                                    | -           |
| 5674  | 3,25     | 3,50    | -1,08 | 0,04528 | 0,436 | 1563376_at   | Clone IMAGE:4469683, mRNA                                   | -           |
| 3234  | 3,44     | 3,70    | -1,08 | 0,02293 | 0,388 | 1570394_at   | 5'-3' exoribonuclease 1                                     | XRN1        |
| 5936  | 5,37     | 5,77    | -1,08 | 0,04814 | 0,443 | 233125_at    | cDNA FLJ11686 fis, clone HEMBA1004944                       | -           |
| 4747  | 2,92     | 3,14    | -1,08 | 0,03596 | 0,414 | 1554781_at   | Hypothetical protein MGC32805                               | MGC32805    |
| 4501  | 2,98     | 3,20    | -1,08 | 0,03388 | 0,411 | 1552394_a_at | ENTH domain containing 1                                    | ENTHD1      |
| 778   | 3,23     | 3,48    | -1,07 | 0,00446 | 0,311 | 1563085_at   | -                                                           | -           |
| 5657  | 2,80     | 3,02    | -1,07 | 0,04512 | 0,436 | 241986_at    | BMP binding endothelial regulator                           | BMPER       |
| 3071  | 3,42     | 3,68    | -1,07 | 0,02166 | 0,385 | 1552453_a_at | WD repeat domain 88                                         | WDR88       |
| 4948  | 4,60     | 4,95    | -1,07 | 0,03797 | 0,419 | 1557697_at   | cDNA clone IMAGE:5311511                                    | -           |
| 4966  | 2,95     | 3,17    | -1,07 | 0,03810 | 0,419 | 241461_at    | Transcribed locus                                           | -           |
| 1445  | 4,20     | 4,51    | -1,07 | 0,00879 | 0,332 | 243066_at    | N-acetylneuraminate pyruvate lyase                          | NPL         |

| Index | Mutated* | Normal* | FC    | P value | FDR** | Probe set    | Description                                                              | Gene symbol |
|-------|----------|---------|-------|---------|-------|--------------|--------------------------------------------------------------------------|-------------|
| 5464  | 2,59     | 2,78    | -1,07 | 0,04316 | 0,432 | 1554921_a_at | Sciellin                                                                 | SCEL        |
| 5884  | 3,96     | 4,26    | -1,07 | 0,04761 | 0,442 | 221439_at    | Retinoblastoma binding protein 9                                         | RBBP9       |
| 4890  | 9,19     | 9,87    | -1,07 | 0,03738 | 0,418 | 1561371_at   | Hypothetical gene supported by AK096399                                  | FLJ39080    |
| 5302  | 2,84     | 3,05    | -1,07 | 0,04138 | 0,426 | 1553497_at   | Chromosome 12 open reading frame 37                                      | C12orf37    |
| 3994  | 4,53     | 4,87    | -1,07 | 0,02921 | 0,400 | 1565858_at   | Small nucleolar RNA, H/ACA box 71A                                       | SNORA71A    |
| 4169  | 3,72     | 4,00    | -1,07 | 0,03081 | 0,404 | 1569257_at   | Formin-like 1                                                            | FMNL1       |
| 4142  | 3,35     | 3,60    | -1,07 | 0,03056 | 0,403 | 1562642_at   | cDNA clone IMAGE:5288897                                                 | -           |
| 3137  | 3,78     | 4,06    | -1,07 | 0,02225 | 0,387 | 1555430_at   | Chromosome 9 open reading frame 97                                       | C9orf97     |
| 3835  | 4,31     | 4,63    | -1,07 | 0,02802 | 0,399 | 234933_at    | KIAA1345 protein                                                         | KIAA1345    |
| 3248  | 2,93     | 3,15    | -1,07 | 0,02307 | 0,388 | 211239_s_at  | ADAM metalloproteinase domain 7                                          | ADAM7       |
| 1714  | 2,73     | 2,93    | -1,07 | 0,01099 | 0,348 | 240251_at    | Intraflagellar transport 80 homolog (Chlamydomonas)                      | IFT80       |
| 5248  | 3,23     | 3,47    | -1,07 | 0,04064 | 0,423 | 224126_at    | Solute carrier family 10, member 7                                       | SLC10A7     |
| 4432  | 3,39     | 3,64    | -1,07 | 0,03320 | 0,409 | 1554965_at   | Filamin A interacting protein 1-like                                     | FILIP1L     |
| 5059  | 5,43     | 5,83    | -1,07 | 0,03895 | 0,420 | 215366_at    | Sorting nexin 13                                                         | SNX13       |
| 4299  | 8,50     | 9,13    | -1,07 | 0,03201 | 0,407 | 36742_at     | Tripartite motif-containing 15                                           | TRIM15      |
| 4261  | 4,13     | 4,44    | -1,07 | 0,03168 | 0,406 | 1563822_at   | cDNA FLJ37602 fis, clone BRCC2009380                                     | -           |
| 4794  | 3,32     | 3,57    | -1,07 | 0,03635 | 0,415 | 207544_s_at  | Alcohol dehydrogenase 6 (class V)                                        | ADH6        |
| 3190  | 3,01     | 3,23    | -1,07 | 0,02262 | 0,387 | 236074_at    | cDNA FLJ31443 fis, clone NT2NE2000808                                    | -           |
| 5873  | 7,33     | 7,87    | -1,07 | 0,04745 | 0,442 | 1554591_at   | Gene differentially expressed in prostate                                | GDEP        |
| 4917  | 45,1     | 48,5    | -1,07 | 0,03763 | 0,418 | 233307_x_at  | cDNA FLJ20066 fis, clone COL01632                                        | -           |
| 5518  | 3,92     | 4,21    | -1,07 | 0,04378 | 0,433 | 220517_at    | Vacuolar protein sorting 13 homolog C (S. cerevisiae)                    | VPS13C      |
| 5507  | 7,57     | 8,13    | -1,07 | 0,04362 | 0,433 | 234557_at    | Similar to COMM domain containing 4                                      | LOC440292   |
| 2249  | 2,85     | 3,06    | -1,07 | 0,01494 | 0,363 | 1554871_at   | -                                                                        | -           |
| 5903  | 3,14     | 3,38    | -1,07 | 0,04783 | 0,443 | 207033_at    | Gastric intrinsic factor (vitamin B synthesis)                           | GIF         |
| 5738  | 6,71     | 7,20    | -1,07 | 0,04601 | 0,438 | 236726_at    | cDNA FLJ43552 fis, clone PROST2017972                                    | -           |
| 3995  | 3,21     | 3,45    | -1,07 | 0,02921 | 0,400 | 224289_s_at  | FKSG83                                                                   | FKSG83      |
| 1569  | 3,27     | 3,51    | -1,07 | 0,00975 | 0,340 | 234622_at    | cDNA FLJ21514 fis, clone COL05780                                        | -           |
| 5325  | 4,46     | 4,79    | -1,07 | 0,04162 | 0,427 | 210348_at    | Septin 4                                                                 | SEPT4       |
| 4068  | 3,00     | 3,22    | -1,07 | 0,02983 | 0,401 | 241678_at    | Transcribed locus                                                        | -           |
| 2888  | 3,01     | 3,23    | -1,07 | 0,02025 | 0,383 | 220697_at    | cDNA clone IMAGE:40003562                                                | -           |
| 5895  | 5,14     | 5,52    | -1,07 | 0,04768 | 0,442 | 228344_s_at  | T-box 3 (ulnar mammary syndrome)                                         | TBX3        |
| 5099  | 13,3     | 14,3    | -1,07 | 0,03922 | 0,420 | 230562_at    | cDNA FLJ25042 fis, clone CBL03351                                        | -           |
| 1382  | 2,83     | 3,04    | -1,07 | 0,00832 | 0,329 | 1564628_at   | cDNA DKFZp564A136                                                        | -           |
| 5013  | 3,69     | 3,96    | -1,07 | 0,03855 | 0,420 | 1553785_at   | RasGEF domain family, member 1B                                          | RASGEF1B    |
| 3504  | 2,71     | 2,90    | -1,07 | 0,02517 | 0,392 | 217400_at    | Similar to Proliferating cell nuclear antigen (PCNA) (Cyclin)            | LOC392454   |
| 3564  | 2,93     | 3,15    | -1,07 | 0,02572 | 0,394 | 1553134_s_at | Chromosome 9 open reading frame 72                                       | C9orf72     |
| 2576  | 4,29     | 4,60    | -1,07 | 0,01748 | 0,371 | 1560212_a_at | Transcribed locus                                                        | -           |
| 3489  | 4,37     | 4,68    | -1,07 | 0,02509 | 0,392 | 211369_at    | PRO2168                                                                  | -           |
| 5723  | 6,60     | 7,07    | -1,07 | 0,04586 | 0,438 | 1569516_at   | Clone IMAGE:5585187, mRNA                                                | -           |
| 5640  | 3,14     | 3,37    | -1,07 | 0,04500 | 0,436 | 232999_at    | cDNA DKFZp564M1563                                                       | -           |
| 807   | 3,56     | 3,82    | -1,07 | 0,00460 | 0,311 | 231315_at    | Transcribed locus                                                        | -           |
| 4897  | 2,93     | 3,14    | -1,07 | 0,03744 | 0,418 | 239479_x_at  | Transcribed locus                                                        | -           |
| 3341  | 3,35     | 3,59    | -1,07 | 0,02372 | 0,388 | 233778_at    | Uncharacterized gastric protein ZG16P                                    | -           |
| 5617  | 3,92     | 4,21    | -1,07 | 0,04483 | 0,436 | 1557767_at   | Nanos homolog 2 (Drosophila)                                             | NANOS2      |
| 4016  | 3,31     | 3,55    | -1,07 | 0,02941 | 0,400 | 241620_at    | Structural maintenance of chromosomes flexible hinge domain containing 1 | SMCHD1      |
| 4452  | 5,69     | 6,10    | -1,07 | 0,03344 | 0,411 | 237811_at    | Transcribed locus                                                        | -           |
| 1927  | 2,76     | 2,96    | -1,07 | 0,01255 | 0,355 | 237978_at    | Transcribed locus                                                        | -           |
| 4297  | 3,65     | 3,91    | -1,07 | 0,03195 | 0,407 | 243427_at    | Transcribed locus                                                        | -           |
| 1507  | 2,96     | 3,18    | -1,07 | 0,00927 | 0,336 | 1562520_at   | cDNA FLJ37868 fis, clone BRSSN2017297                                    | -           |
| 5575  | 4,11     | 4,41    | -1,07 | 0,04442 | 0,436 | 229406_at    | Hypothetical protein LOC146713                                           | HRNBP3      |
| 5860  | 4,52     | 4,85    | -1,07 | 0,04738 | 0,442 | 1554842_at   | Solute carrier family 12, member 1                                       | SLC12A1     |
| 2444  | 3,12     | 3,34    | -1,07 | 0,01635 | 0,366 | 1552715_a_at | Relaxin/insulin-like family peptide receptor 1                           | RXFP1       |
| 3663  | 3,97     | 4,26    | -1,07 | 0,02648 | 0,395 | 1555671_at   | Islet cell autoantigen 1,69kDa-like                                      | ICA1L       |
| 1994  | 2,75     | 2,95    | -1,07 | 0,01303 | 0,355 | 237987_x_at  | -                                                                        | -           |
| 4757  | 3,88     | 4,16    | -1,07 | 0,03607 | 0,414 | 1554716_s_at | Chromosome 15 open reading frame 50                                      | C15orf50    |
| 5109  | 5,58     | 5,98    | -1,07 | 0,03930 | 0,421 | 1564559_at   | Hypothetical protein LOC728073                                           | LOC728073   |
| 4749  | 3,79     | 4,06    | -1,07 | 0,03599 | 0,414 | 1567139_at   | TTY2 gene, clone TTY2L12A                                                | -           |

| Index       | Mutated* | Normal* | FC    | P value | FDR** | Probe set       | Description                                                      | Gene symbol      |
|-------------|----------|---------|-------|---------|-------|-----------------|------------------------------------------------------------------|------------------|
| 1877        | 2,75     | 2,95    | -1,07 | 0,01214 | 0,354 | 1563754_at      | Glutamate receptor, ionotropic, kainate 2                        | <i>GRIK2</i>     |
| 5684        | 4,07     | 4,36    | -1,07 | 0,04538 | 0,436 | 239820_at       | Ring finger protein 7                                            | <i>RNF7</i>      |
| 5727        | 7,30     | 7,82    | -1,07 | 0,04592 | 0,438 | 1570068_at      | Clone IMAGE:4294479, mRNA                                        | -                |
| 4018        | 3,25     | 3,48    | -1,07 | 0,02942 | 0,400 | 242047_at       | Pleckstrin homology domain containing, family K member 1         | <i>PLEKHK1</i>   |
| 5400        | 13,2     | 14,2    | -1,07 | 0,04235 | 0,429 | 207488_at       | -                                                                | -                |
| 2748        | 3,27     | 3,50    | -1,07 | 0,01900 | 0,378 | 209990_s_at     | Gamma-aminobutyric acid (GABA) B receptor, 2                     | <i>GABBR2</i>    |
| 4069        | 3,41     | 3,65    | -1,07 | 0,02984 | 0,401 | 216477_at       | -                                                                | -                |
| 1409        | 3,65     | 3,91    | -1,07 | 0,00851 | 0,330 | 235251_at       | cDNA FLJ42786 fis, clone BRAWH3006761                            | -                |
| 5254        | 3,03     | 3,25    | -1,07 | 0,04072 | 0,424 | 1562850_at      | cDNA clone IMAGE:5742601                                         | -                |
| 2778        | 13,7     | 14,7    | -1,07 | 0,01930 | 0,380 | 1563425_at      | Clone IMAGE:429302, mRNA sequence                                | -                |
| 2073        | 3,08     | 3,30    | -1,07 | 0,01355 | 0,356 | 1555345_at      | Solute carrier family 38, member 4                               | <i>SLC38A4</i>   |
| 5047        | 3,49     | 3,73    | -1,07 | 0,03889 | 0,420 | 1566219_at      | Hypothetical protein LOC338651                                   | <i>LOC338651</i> |
| 4294        | 3,63     | 3,88    | -1,07 | 0,03193 | 0,406 | 1570234_at      | Clone IMAGE:5169759, mRNA                                        | -                |
| 5300        | 3,14     | 3,36    | -1,07 | 0,04131 | 0,426 | 240073_at       | -                                                                | -                |
| 2603        | 10,7     | 11,5    | -1,07 | 0,01767 | 0,371 | 1569300_at      | Chromosome 1 open reading frame 148                              | <i>C1orf148</i>  |
| 2401        | 3,53     | 3,78    | -1,07 | 0,01601 | 0,365 | 1553472_at      | Hypothetical protein FLJ32955                                    | <i>FLJ32955</i>  |
| 3950        | 4,90     | 5,25    | -1,07 | 0,02884 | 0,399 | 217439_at       | -                                                                | -                |
| 5022        | 5,54     | 5,93    | -1,07 | 0,03862 | 0,420 | 243674_at       | -                                                                | -                |
| 5245        | 4,81     | 5,14    | -1,07 | 0,04061 | 0,423 | 233556_at       | cDNA clone IMAGE:5274560                                         | -                |
| 5319        | 7,29     | 7,80    | -1,07 | 0,04151 | 0,427 | 240567_at       | cDNA clone IMAGE:4096591                                         | -                |
| 2926        | 3,91     | 4,19    | -1,07 | 0,02051 | 0,383 | 1555135_at      | -                                                                | -                |
| <b>4453</b> | 3,78     | 4,04    | -1,07 | 0,03344 | 0,411 | 215964_at       | EST clone 22453 mariner transposon Hsmar1 sequence               | -                |
| 5944        | 2,99     | 3,20    | -1,07 | 0,04817 | 0,443 | 233050_at       | Chromosome 6 open reading frame 174                              | <i>C6orf174</i>  |
| 3575        | 3,58     | 3,83    | -1,07 | 0,02581 | 0,394 | 203820_s_at     | Insulin-like growth factor 2 mRNA binding protein 3              | <i>IGF2BP3</i>   |
| 4904        | 4,18     | 4,47    | -1,07 | 0,03751 | 0,418 | 1564084_at      | CAD trifunctional protein                                        | <i>CAD</i>       |
| 3661        | 3,48     | 3,73    | -1,07 | 0,02647 | 0,395 | 235818_at       | v-Set and transmembrane domain containing 1                      | <i>VSTM1</i>     |
| 4175        | 4,13     | 4,42    | -1,07 | 0,03086 | 0,404 | 1565882_at      | cDNA FLJ12064 fis, clone HEMBB1002232                            | -                |
| 6015        | 4,36     | 4,66    | -1,07 | 0,04894 | 0,445 | 228265_at       | cDNA clone IMAGE:6214748                                         | -                |
| 4346        | 3,31     | 3,54    | -1,07 | 0,03237 | 0,407 | 1559732_at      | Negative regulator of ubiquitin-like proteins 1                  | <i>NUB1</i>      |
| 4061        | 3,39     | 3,62    | -1,07 | 0,02980 | 0,401 | 1569721_at      | cDNA clone IMAGE:4838541                                         | -                |
| 4986        | 4,63     | 4,95    | -1,07 | 0,03827 | 0,419 | 238857_at       | Arginyltransferase 1                                             | <i>ATE1</i>      |
| 2897        | 3,55     | 3,80    | -1,07 | 0,02034 | 0,383 | 1566505_at      | cDNA FLJ34475 fis, clone HLUNG2003716                            | -                |
| 6118        | 3,14     | 3,36    | -1,07 | 0,04996 | 0,446 | 220551_at       | Solute carrier family 17, member 6                               | <i>SLC17A6</i>   |
| 4201        | 3,25     | 3,47    | -1,07 | 0,03108 | 0,404 | 231127_at       | Transcribed locus                                                | -                |
| 5252        | 4,57     | 4,89    | -1,07 | 0,04068 | 0,423 | 1557056_at      | Hypothetical protein LOC133491                                   | <i>LOC133491</i> |
| 3761        | 3,00     | 3,21    | -1,07 | 0,02734 | 0,397 | 1566481_at      | cDNA DKFZp313L2229                                               | -                |
| 1690        | 2,90     | 3,10    | -1,07 | 0,01069 | 0,346 | 1560063_a_at    | cDNA DKFZp667J114                                                | -                |
| 2433        | 3,52     | 3,77    | -1,07 | 0,01626 | 0,365 | AFFX-LysX-M_i - | -                                                                | -                |
| 2610        | 3,23     | 3,45    | -1,07 | 0,01773 | 0,371 | 231308_at       | Similar to Ankyrin repeat and FYVE domain containing 1 isoform 1 | -                |
| 5031        | 3,54     | 3,79    | -1,07 | 0,03867 | 0,420 | 1559069_at      | mRNA full length insert cDNA clone EUROIMAGE 240968              | -                |
| 2824        | 4,17     | 4,46    | -1,07 | 0,01972 | 0,381 | 1568931_at      | cDNA clone IMAGE:4799464                                         | -                |
| 2217        | 2,88     | 3,08    | -1,07 | 0,01469 | 0,362 | 232314_at       | Mitochondrial fission regulator 1                                | <i>MTFR1</i>     |
| 2853        | 75,1     | 80,2    | -1,07 | 0,02001 | 0,383 | 38447_at        | Ankyrin repeat domain 13 family, member D                        | <i>ANKRD13D</i>  |
| 2776        | 3,05     | 3,26    | -1,07 | 0,01928 | 0,380 | 215542_at       | -                                                                | -                |
| 5019        | 5,75     | 6,14    | -1,07 | 0,03861 | 0,420 | 1565918_a_at    | mRNA from chromosome 5q21-22, clone:LI26                         | -                |
| 1236        | 5,71     | 6,10    | -1,07 | 0,00735 | 0,324 | 1561392_at      | cDNA clone IMAGE:3877950                                         | -                |
| 5774        | 6,67     | 7,13    | -1,07 | 0,04642 | 0,440 | 243248_at       | Transcribed locus                                                | -                |
| 5639        | 4,63     | 4,95    | -1,07 | 0,04499 | 0,436 | 217512_at       | -                                                                | -                |
| 5785        | 4,10     | 4,39    | -1,07 | 0,04659 | 0,440 | 216160_at       | cDNA FLJ14169 fis, clone NT2RP2002056                            | -                |
| 2851        | 3,26     | 3,49    | -1,07 | 0,01997 | 0,383 | 224379_at       | Ferritin, heavy polypeptide-like 17                              | <i>FTHL17</i>    |
| 3046        | 3,16     | 3,38    | -1,07 | 0,02145 | 0,385 | 220860_at       | Purine-rich element binding protein G                            | <i>PURG</i>      |
| 4128        | 3,77     | 4,03    | -1,07 | 0,03038 | 0,402 | 215463_at       | Olfactory receptor, family 7, subfamily E, member 24             | <i>OR7E24</i>    |
| 5910        | 4,10     | 4,38    | -1,07 | 0,04792 | 0,443 | 224128_at       | Chromosome 20 open reading frame 43                              | <i>C20orf43</i>  |
| 5697        | 4,61     | 4,92    | -1,07 | 0,04559 | 0,438 | 220461_at       | Pecanex-like 2 (Drosophila)                                      | <i>PCNXL2</i>    |
| 2766        | 4,20     | 4,49    | -1,07 | 0,01921 | 0,379 | 1561407_at      | Centaurin, delta 1                                               | <i>CENTD1</i>    |
| 5413        | 2,98     | 3,18    | -1,07 | 0,04253 | 0,430 | 1559651_at      | Similar to Casein kinase I alpha                                 | <i>LOC161635</i> |
| 3808        | 6,33     | 6,76    | -1,07 | 0,02774 | 0,398 | 1565612_at      | Dynein, light chain, roadblock-type 1                            | <i>DYNLRB1</i>   |

| Index | Mutated* | Normal* | FC    | P value | FDR** | Probe set    | Description                                                         | Gene symbol      |
|-------|----------|---------|-------|---------|-------|--------------|---------------------------------------------------------------------|------------------|
| 5316  | 4,41     | 4,71    | -1,07 | 0,04148 | 0,427 | 1552459_a_at | Methyl-CpG binding domain protein 3-like 1                          | <i>MBD3L1</i>    |
| 4826  | 3,12     | 3,33    | -1,07 | 0,03674 | 0,416 | 241553_at    | Germ cell associated 1                                              | <i>GSG1</i>      |
| 5101  | 3,71     | 3,97    | -1,07 | 0,03923 | 0,420 | 238239_at    | WD repeat domain 27                                                 | <i>WDR27</i>     |
| 5533  | 3,38     | 3,61    | -1,07 | 0,04393 | 0,434 | 231335_at    | Membrane-spanning 4-domains, subfamily A, member 6E                 | <i>MS4A6E</i>    |
| 5272  | 4,00     | 4,27    | -1,07 | 0,04096 | 0,425 | 214515_at    | Olfactory receptor, family 1, subfamily E, member 1                 | <i>OR1E1</i>     |
| 3207  | 3,15     | 3,37    | -1,07 | 0,02270 | 0,387 | 1569585_at   | cDNA clone IMAGE:3959751                                            | -                |
| 5306  | 2,80     | 2,99    | -1,07 | 0,04140 | 0,426 | 240050_s_at  | Transcribed locus                                                   | -                |
| 1590  | 3,11     | 3,32    | -1,07 | 0,00988 | 0,340 | 242964_at    | Transcribed locus                                                   | -                |
| 5837  | 4,06     | 4,34    | -1,07 | 0,04717 | 0,442 | 1561732_at   | Clone IMAGE:5547271, mRNA                                           | -                |
| 6109  | 4,38     | 4,68    | -1,07 | 0,04987 | 0,446 | 241254_at    | Transcribed locus                                                   | -                |
| 1698  | 3,17     | 3,38    | -1,07 | 0,01080 | 0,348 | 1562193_at   | Clone IMAGE:5744109, mRNA                                           | -                |
| 5219  | 3,83     | 4,09    | -1,07 | 0,04036 | 0,423 | 223678_s_at  | Surfactant, pulmonary-associated protein A1B                        | <i>SFTPA1B</i>   |
| 4308  | 4,63     | 4,95    | -1,07 | 0,03208 | 0,407 | 207817_at    | Interferon, omega 1                                                 | <i>IFNW1</i>     |
| 4487  | 3,71     | 3,96    | -1,07 | 0,03375 | 0,411 | 224154_at    | UDP-GlcNAc:betaGal beta-1,3-N-acetylglucosaminyltransferase 2       | <i>B3GNT2</i>    |
| 5549  | 4,70     | 5,02    | -1,07 | 0,04413 | 0,435 | 221401_at    | Calcium channel, voltage-dependent, gamma subunit 5                 | <i>CACNG5</i>    |
| 4839  | 3,23     | 3,45    | -1,07 | 0,03689 | 0,417 | 241651_at    | Transcribed locus                                                   | -                |
| 5390  | 5,86     | 6,25    | -1,07 | 0,04227 | 0,429 | 1556003_a_at | Transcribed locus                                                   | -                |
| 5596  | 4,47     | 4,77    | -1,07 | 0,04462 | 0,436 | 1553818_x_at | POM121-like protein                                                 | -                |
| 4535  | 4,57     | 4,88    | -1,07 | 0,03427 | 0,412 | 1555666_at   | Protein tyrosine phosphatase, receptor type, S                      | <i>PTPRS</i>     |
| 5689  | 3,20     | 3,41    | -1,07 | 0,04548 | 0,437 | 1556297_a_at | cDNA clone IMAGE:5295605                                            | -                |
| 3275  | 2,94     | 3,13    | -1,07 | 0,02331 | 0,388 | 1569929_at   | -                                                                   | -                |
| 5828  | 4,30     | 4,58    | -1,07 | 0,04710 | 0,442 | 1557287_at   | cDNA clone IMAGE:4837072                                            | -                |
| 1581  | 2,44     | 2,60    | -1,07 | 0,00984 | 0,340 | 1568925_at   | MLCK protein                                                        | <i>MLCK</i>      |
| 4842  | 3,60     | 3,83    | -1,07 | 0,03691 | 0,417 | 1565920_at   | mRNA from chromosome 5q21-22, clone:LI26                            | -                |
| 5210  | 5,18     | 5,52    | -1,07 | 0,04021 | 0,422 | 1558855_at   | FERM, RhoGEF and pleckstrin domain protein 2                        | <i>FARP2</i>     |
| 4111  | 3,00     | 3,20    | -1,07 | 0,03022 | 0,402 | 243652_at    | Transcribed locus                                                   | -                |
| 2294  | 3,03     | 3,23    | -1,07 | 0,01525 | 0,363 | 244225_x_at  | -                                                                   | -                |
| 5026  | 3,22     | 3,43    | -1,07 | 0,03864 | 0,420 | 235262_at    | Zinc finger protein 585B                                            | <i>ZNF585B</i>   |
| 2014  | 3,43     | 3,66    | -1,07 | 0,01314 | 0,355 | 241543_at    | -                                                                   | -                |
| 2913  | 3,40     | 3,63    | -1,07 | 0,02046 | 0,383 | 206909_at    | -                                                                   | -                |
| 5829  | 3,69     | 3,93    | -1,07 | 0,04711 | 0,442 | 1553861_at   | T-complex 11 (mouse)-like 2                                         | <i>TCP11L2</i>   |
| 5097  | 4,73     | 5,04    | -1,07 | 0,03922 | 0,420 | 209847_at    | Cadherin 17, LI Cadherin (liver-intestine)                          | <i>CDH17</i>     |
| 4864  | 2,97     | 3,17    | -1,06 | 0,03710 | 0,417 | 1559229_at   | cDNA clone IMAGE:3621839                                            | -                |
| 5370  | 2,85     | 3,04    | -1,06 | 0,04215 | 0,429 | 211119_at    | Estrogen receptor 2 (ER beta)                                       | <i>ESR2</i>      |
| 5538  | 23,7     | 25,2    | -1,06 | 0,04401 | 0,434 | 234481_at    | -                                                                   | -                |
| 3695  | 2,92     | 3,11    | -1,06 | 0,02673 | 0,395 | 1560940_at   | cDNA FLJ32834 fis, clone TESTI2003236                               | -                |
| 870   | 3,09     | 3,29    | -1,06 | 0,00502 | 0,313 | 1561445_at   | cDNA clone IMAGE:4821940                                            | -                |
| 4615  | 2,99     | 3,19    | -1,06 | 0,03484 | 0,412 | 242291_at    | Eukaryotic translation initiation factor 4E nuclear import factor 1 | <i>EIF4ENIF1</i> |
| 5702  | 4,06     | 4,32    | -1,06 | 0,04565 | 0,438 | 1557451_at   | DiGeorge syndrome critical region gene 10                           | <i>DGCR10</i>    |
| 4812  | 5,88     | 6,27    | -1,06 | 0,03656 | 0,415 | 1562034_at   | Chromosome 21 open reading frame 134                                | <i>C21orf134</i> |
| 3790  | 3,32     | 3,54    | -1,06 | 0,02760 | 0,398 | 210436_at    | Chaperonin containing TCP1, subunit 8 (theta)                       | <i>CCT8</i>      |
| 5969  | 3,46     | 3,68    | -1,06 | 0,04848 | 0,444 | 1562424_at   | Hypothetical protein LOC285889                                      | <i>LOC285889</i> |
| 5581  | 2,95     | 3,14    | -1,06 | 0,04450 | 0,436 | 234679_at    | Keratin associated protein 9-3                                      | <i>KRTAP9-3</i>  |
| 5982  | 3,76     | 4,00    | -1,06 | 0,04856 | 0,444 | 1555476_at   | Iron-responsive element binding protein 2                           | <i>IREB2</i>     |
| 3010  | 2,73     | 2,90    | -1,06 | 0,02118 | 0,385 | 1560404_a_at | ATP binding domain 4                                                | <i>ATPBD4</i>    |
| 3418  | 2,88     | 3,07    | -1,06 | 0,02442 | 0,391 | 1564392_at   | Chromosome 21 open reading frame 131                                | <i>C21orf131</i> |
| 4384  | 3,07     | 3,27    | -1,06 | 0,03265 | 0,407 | 236888_at    | Capping protein (actin filament) muscle Z-line, alpha 3             | <i>CAPZA3</i>    |
| 5069  | 3,14     | 3,34    | -1,06 | 0,03901 | 0,420 | 1564235_at   | HCG1994895 protein                                                  | -                |
| 5547  | 3,17     | 3,37    | -1,06 | 0,04410 | 0,435 | 215448_at    | Clone 23638 mRNA sequence                                           | -                |
| 1139  | 3,55     | 3,78    | -1,06 | 0,00666 | 0,320 | 234309_at    | Testis-specific transcript, Y-linked 7                              | <i>TTY7</i>      |
| 5625  | 4,18     | 4,45    | -1,06 | 0,04492 | 0,436 | 1564590_a_at | Orofacial cleft 1 candidate 1                                       | <i>OFCC1</i>     |
| 5545  | 3,66     | 3,89    | -1,06 | 0,04408 | 0,435 | 220978_at    | Keratin associated protein 1-3                                      | <i>KRTAP1-3</i>  |
| 5811  | 2,77     | 2,95    | -1,06 | 0,04694 | 0,442 | 1561703_at   | cDNA clone IMAGE:5269594                                            | -                |
| 2260  | 2,79     | 2,97    | -1,06 | 0,01505 | 0,363 | 240952_at    | Transcribed locus                                                   | -                |
| 3698  | 4,30     | 4,57    | -1,06 | 0,02674 | 0,395 | 234427_at    | T cell receptor alpha locus                                         | <i>TRA@</i>      |
| 4671  | 2,89     | 3,07    | -1,06 | 0,03526 | 0,413 | 215704_at    | Filaggrin                                                           | <i>FLG</i>       |
| 5375  | 3,90     | 4,14    | -1,06 | 0,04217 | 0,429 | 1562597_at   | Clone IMAGE:5742729, mRNA                                           | -                |

| Index | Mutated* | Normal* | FC    | P value | FDR** | Probe set    | Description                                                      | Gene symbol |
|-------|----------|---------|-------|---------|-------|--------------|------------------------------------------------------------------|-------------|
| 4350  | 3,37     | 3,58    | -1,06 | 0,03239 | 0,407 | 1557672_s_at | cDNA clone IMAGE:5297153                                         | -           |
| 5438  | 4,21     | 4,47    | -1,06 | 0,04287 | 0,431 | 1552414_at   | WAP four-disulfide core domain 9                                 | WFDC9       |
| 2489  | 2,73     | 2,90    | -1,06 | 0,01678 | 0,367 | 229478_x_at  | Basic, immunoglobulin-like variable motif containing             | BIVM        |
| 1989  | 3,09     | 3,28    | -1,06 | 0,01301 | 0,355 | 210521_s_at  | Fetuin B                                                         | FETUB       |
| 5160  | 2,75     | 2,92    | -1,06 | 0,03973 | 0,421 | 216672_s_at  | Myelin transcription factor 1-like                               | MYT1L       |
| 5098  | 3,48     | 3,70    | -1,06 | 0,03922 | 0,420 | 239950_at    | Homeo box A11, antisense                                         | HOXA11S     |
| 2966  | 3,11     | 3,30    | -1,06 | 0,02084 | 0,384 | 233312_at    | Ropporin 1-like                                                  | ROPN1L      |
| 3696  | 2,73     | 2,90    | -1,06 | 0,02674 | 0,395 | 217452_s_at  | UDP-Gal:betaGlcNAc beta 1,3-galactosyltransferase, polypeptide 2 | B3GALT2     |
| 4329  | 4,80     | 5,09    | -1,06 | 0,03221 | 0,407 | 234416_at    | Immunoglobulin lambda variable 2-14                              | IGLV2-14    |
| 1880  | 2,80     | 2,98    | -1,06 | 0,01219 | 0,355 | 243725_at    | Transcribed locus                                                | -           |
| 1510  | 2,57     | 2,73    | -1,06 | 0,00931 | 0,337 | 241291_at    | cDNA FLJ36657 fis, clone UTERU2001876                            | -           |
| 6032  | 7,59     | 8,05    | -1,06 | 0,04910 | 0,445 | 231141_at    | cDNA clone IMAGE:4838568                                         | -           |
| 4608  | 4,15     | 4,40    | -1,06 | 0,03481 | 0,412 | 241128_at    | -                                                                | -           |
| 5605  | 3,54     | 3,76    | -1,06 | 0,04471 | 0,436 | 231529_at    | Maternally expressed 3                                           | MEG3        |
| 4263  | 3,18     | 3,37    | -1,06 | 0,03171 | 0,406 | 1567612_at   | Transcript ch132                                                 | -           |
| 4091  | 4,22     | 4,47    | -1,06 | 0,03008 | 0,402 | 241056_at    | Zinc finger CCCH-type containing 3                               | ZC3H3       |
| 3145  | 2,75     | 2,91    | -1,06 | 0,02231 | 0,387 | 240474_x_at  | Transcribed locus                                                | -           |
| 3598  | 2,62     | 2,78    | -1,06 | 0,02595 | 0,394 | 1557206_at   | Hypothetical protein FLJ35848                                    | FLJ35848    |
| 3001  | 2,77     | 2,94    | -1,06 | 0,02113 | 0,385 | 1568898_at   | Clone IMAGE:3921535, mRNA                                        | -           |
| 4486  | 2,70     | 2,86    | -1,06 | 0,03375 | 0,411 | 233295_at    | Pheromone receptor (PHRET) pseudogene                            | -           |
| 5551  | 3,70     | 3,92    | -1,06 | 0,04414 | 0,435 | 220527_at    | Mitochondrial ribosomal protein L20                              | MRPL20      |
| 3901  | 2,88     | 3,05    | -1,06 | 0,02851 | 0,399 | 1562640_at   | Hypothetical protein LOC285943                                   | LOC285943   |
| 4351  | 2,80     | 2,96    | -1,06 | 0,03240 | 0,407 | 231665_at    | Arginase, liver                                                  | ARG1        |
| 4126  | 3,14     | 3,32    | -1,06 | 0,03036 | 0,402 | 1558813_at   | Transmembrane emp24 protein transport domain containing 5        | TMED5       |
| 4097  | 2,69     | 2,85    | -1,06 | 0,03011 | 0,402 | 1556877_at   | cDNA clone IMAGE:4799788                                         | -           |
| 3218  | 2,73     | 2,89    | -1,06 | 0,02280 | 0,387 | 237996_at    | -                                                                | -           |
| 4788  | 2,75     | 2,90    | -1,06 | 0,03631 | 0,415 | 1562313_at   | BCL6 co-repressor-like 2                                         | BCORL2      |
| 2839  | 2,78     | 2,94    | -1,06 | 0,01981 | 0,382 | 1568711_a_at | cDNA clone IMAGE:4829846                                         | -           |
| 5752  | 3,55     | 3,75    | -1,06 | 0,04616 | 0,439 | 1555369_at   | B melanoma antigen                                               | BAGE        |
| 4460  | 2,75     | 2,91    | -1,06 | 0,03351 | 0,411 | 241569_at    | Transcribed locus                                                | -           |
| 3192  | 3,30     | 3,48    | -1,06 | 0,02262 | 0,387 | 234616_at    | cDNA FLJ21341 fis, clone COL02653                                | -           |
| 4719  | 3,16     | 3,33    | -1,05 | 0,03570 | 0,413 | 1558645_at   | Mindbomb homolog 1 (Drosophila)                                  | MIB1        |
| 4498  | 3,04     | 3,21    | -1,05 | 0,03384 | 0,411 | 1553022_at   | Zinc finger, imprinted 3                                         | ZIM3        |
| 5405  | 2,98     | 3,14    | -1,05 | 0,04243 | 0,429 | 1562418_at   | Clone IMAGE:5227164, mRNA                                        | -           |
| 5043  | 2,75     | 2,89    | -1,05 | 0,03886 | 0,420 | 234209_at    | cDNA FLJ21495 fis, clone COL05614                                | -           |
| 2952  | 2,46     | 2,59    | -1,05 | 0,02072 | 0,384 | 1569591_at   | Coagulation factor XI (plasma thromboplastin antecedent)         | F11         |
| 5845  | 2,96     | 3,11    | -1,05 | 0,04722 | 0,442 | 1570517_at   | Four and a half LIM domains 5                                    | FHL5        |
| 5434  | 3,16     | 3,31    | -1,05 | 0,04281 | 0,431 | 1558846_at   | Pancreatic lipase-related protein 3                              | PNLIPRP3    |
| 5344  | 2,73     | 2,86    | -1,05 | 0,04189 | 0,429 | 236735_at    | -                                                                | -           |
| 1658  | 2,58     | 2,71    | -1,05 | 0,01047 | 0,345 | 241557_x_at  | Transcribed locus                                                | -           |
| 3954  | 2,80     | 2,93    | -1,05 | 0,02889 | 0,399 | 1563680_at   | Hypothetical protein LOC284950                                   | LOC284950   |
| 5195  | 2,78     | 2,91    | -1,05 | 0,04006 | 0,421 | 215944_at    | -                                                                | -           |
| 4568  | 2,59     | 2,72    | -1,05 | 0,03455 | 0,412 | 243281_at    | Transcribed locus                                                | -           |
| 2214  | 2,41     | 2,53    | -1,05 | 0,01467 | 0,362 | 241961_at    | Steroid 5 alpha-reductase 2-like 2                               | SRD5A2L2    |
| 4044  | 3,16     | 3,31    | -1,05 | 0,02965 | 0,401 | 232817_at    | cDNA FLJ13415 fis, clone PLACE1001799                            | -           |
| 5095  | 2,98     | 3,12    | -1,05 | 0,03920 | 0,420 | 207674_at    | Fc fragment of IgA, receptor for                                 | FCAR        |
| 3914  | 2,62     | 2,74    | -1,05 | 0,02858 | 0,399 | 1557717_at   | Hypothetical protein LOC338862                                   | LOC338862   |
| 4045  | 2,65     | 2,77    | -1,05 | 0,02965 | 0,401 | 1561437_at   | Hypothetical gene LOC728012                                      | LOC728012   |
| 5255  | 2,94     | 3,07    | -1,04 | 0,04073 | 0,424 | 1560989_at   | Full length insert cDNA clone YY93H10                            | -           |
| 5771  | 2,87     | 2,99    | -1,04 | 0,04637 | 0,439 | 1570194_x_at | Clone IMAGE:4480721, mRNA                                        | -           |
| 4741  | 3,30     | 3,43    | -1,04 | 0,03591 | 0,414 | 237938_at    | Transcribed locus                                                | -           |
| 5256  | 2,58     | 2,68    | -1,04 | 0,04075 | 0,424 | 1561959_x_at | Full length insert cDNA clone YR17E12                            | -           |

\* Geometric mean of intensities

\*\* False Discovery Rate
