# Supplementary material for: Gene Expression Profiling Reveals New Aspects of PIK3CA Mutation in ERalpha-Positive Breast Cancer: Major Implication of the Wnt Signaling Pathway
Source: PubMed Central journal article supplement (PMC3012715; doi:10.1371/journal.pone.0015647), 2010-12-30
Supplement: pone.0015647.s004.pdf [file pone.0015647.s004.pdf]

| Rank in PAM | Symbol Gene     | Name Gene                                                                         | Probe set          | FC           | GenBank          |
|-------------|-----------------|-----------------------------------------------------------------------------------|--------------------|--------------|------------------|
| 1           | <i>WNT5A</i>    | <b>Wingless-type mouse mammary tumor virus integration site family, member 5A</b> | <b>231227_at</b>   | <b>3.43</b>  | <b>NM_003392</b> |
| 2           | <i>PPL</i>      | Periplakin                                                                        | 203407_at          | 2.42         | NM_002745        |
| 3           | <i>PIK3R1</i>   | Phosphoinositide-3-kinase, regulatory subunit 1 (alpha)                           | 212240_s_at        | 2.45         | NM_181523        |
| 4           | <i>ID4</i>      | Inhibitor of DNA binding 4, dominant negative helix-loop-helix protein            | 209291_at          | 2.96         | NM_001546        |
| 5           | <i>LTF</i>      | <b>Lactotransferrin</b>                                                           | <b>202018_at</b>   | <b>10.52</b> | <b>NM_002343</b> |
| 6           | <i>TCF7L2</i>   | Transcription factor 7-like 2 (T-cell specific, HMG-box)                          | 216551_s_at        | 2.16         | NM_030756        |
| 7           | <i>HMGCS2</i>   | <b>3-hydroxy-3-methylglutanyl-Coenzyme A synthase 2 (mitochondrial)</b>           | <b>204607_at</b>   | <b>5.31</b>  | <b>NM_005518</b> |
| 8           | <i>TCF7L2</i>   | Transcription factor 7-like 2 (T-cell specific, HMG-box)                          | 216035_x_at        | 2.08         | NM_030756        |
| 9           | <i>LIMCH1</i>   | LIM and calponin homology domains 1                                               | 212328_at          | 2.69         | NM_014988        |
| 10          | <i>NRIP3</i>    | <b>Nuclear receptor interacting protein 3</b>                                     | <b>219557_s_at</b> | <b>3.28</b>  | <b>NM_020645</b> |
| 11          | <i>WNT5A</i>    | Wingless-type mouse mammary tumor virus integration site family, member 5A        | 205990_s_at        | 2.84         | NM_003392        |
| 12          | <i>ATP1B1</i>   | ATPase, Na+/K+ transporting, beta 1 polypeptide                                   | 201242_s_at        | 2.76         | NM_001677        |
| 13          | <i>TCF7L2</i>   | Transcription factor 7-like 2 (T-cell specific, HMG-box)                          | 212762_s_at        | 2.18         | NM_030756        |
| 14          | <i>ID4</i>      | <b>Inhibitor of DNA binding 4, dominant negative helix-loop-helix protein</b>     | <b>209292_at</b>   | <b>3.03</b>  | <b>NM_001546</b> |
| 15          | <i>SLC4A4</i>   | <b>Solute carrier family 4, sodium bicarbonate cotransporter, member 4</b>        | <b>203908_at</b>   | <b>4.81</b>  | <b>NM_003759</b> |
| 16          | <i>LIMCH1</i>   | LIM and calponin homology domains 1                                               | 212325_at          | 2.96         | NM_014988        |
| 17          | <i>SLC40A1</i>  | <b>Solute carrier family 40 (iron-regulated transporter), member 1</b>            | <b>239723_at</b>   | <b>4.42</b>  | <b>NM_014585</b> |
| 18          | <i>VTCN1</i>    | <b>V-set domain containin T cell activity inhibitor 1</b>                         | <b>219768_at</b>   | <b>5.47</b>  | <b>NM_024626</b> |
| 19          | <i>PMEPA1</i>   | Prostate transmembrane protein, androgen induced 1                                | 222450_at          | 2.21         | NM_020182        |
| 20          | <i>ATP1B1</i>   | ATPase, Na+/K+ transporting, beta 1 polypeptide                                   | 201243_s_at        | 2.71         | NM_001677        |
| 21          | <i>WNT5A</i>    | Wingless-type mouse mammary tumor virus integration site family, member 5A        | 213425_at          | 2.81         | NM_003392        |
| 22          | <i>ZFP36L1</i>  | Zinc finger protein 36, C3H type-like 1                                           | 211962_s_at        | 1.75         | NM_004926        |
| 23          | <i>SERPINB5</i> | Serpin peptidase inhibitor, clade B (ovalbumin), member 5                         | 204855_at          | 2.99         | NM_002639        |
| 24          | <i>SEC14L2</i>  | <b>SEC14-like 2</b>                                                               | <b>204541_at</b>   | <b>3.03</b>  | <b>NM_012429</b> |
| 25          | <i>REEP1</i>    | <b>Receptor accessory protein 1</b>                                               | <b>204364_s_at</b> | <b>3.30</b>  | <b>NM_022912</b> |
| 26          | <i>NTN4</i>     | <b>Netrin 4</b>                                                                   | <b>223315_at</b>   | <b>4.21</b>  | <b>NM_021229</b> |
| 27          | <i>NKAIN1</i>   | <b>Na+/K+ transporting ATPase interacting 1</b>                                   | <b>219438_at</b>   | <b>-3.52</b> | <b>NM_024522</b> |
| 28          | <i>MAPT</i>     | Microtubule-associated protein tau                                                | 206401_s_at        | 2.82         | NM_016835        |
| 29          | <i>PIK3R1</i>   | Phosphoinositide-3-kinase, regulatory subunit 1 (alpha)                           | 212249_at          | 2.34         | NM_181523        |
| 30          | <i>TCF7L2</i>   | Transcription factor 7-like 2 (T-cell specific, HMG-box)                          | 216037_x_at        | 1.86         | NM_030756        |
| 31          | <i>SEC14L2</i>  | <b>SEC14-like 2</b>                                                               | <b>230316_at</b>   | <b>3.05</b>  | <b>NM_012429</b> |
| 32          | <i>CYP4Z2P</i>  | <b>Cytochrome P450, family 4, subfamily Z, polypeptide 2 pseudogene</b>           | <b>1553434_at</b>  | <b>3.80</b>  | <b>NR_002788</b> |
| 33          | <i>LIMCH1</i>   | LIM and calponin homology domains 1                                               | 241459_at          | 2.35         | NM_014988        |
| 34          | <i>ANPEP</i>    | <b>Alanyl (membrane) aminopeptidase</b>                                           | <b>202888_s_at</b> | <b>3.52</b>  | <b>NM_001150</b> |
| 35          | <i>NEDD9</i>    | Neural precursor cell expressed, developmentally down-regulated 9                 | 202149_at          | 2.48         | NM_006403        |
| 36          | <i>ZFP36L1</i>  | Zinc finger protein 36, C3H type-like 1                                           | 211965_at          | 2.18         | NM_004926        |

|           |                      |                                                                                    |                    |             |                  |
|-----------|----------------------|------------------------------------------------------------------------------------|--------------------|-------------|------------------|
| 37        | <i>TCF7L2</i>        | Transcription factor 7-like 2 (T-cell specific, HMG-box)                           | 212761_at          | 1.92        | NM_030756        |
| <b>38</b> | <b><i>CYP4B1</i></b> | <b>Cytochrome P450, family 4, subfamily B, polypeptide 1</b>                       | <b>210096_at</b>   | <b>4.12</b> | <b>NM_000779</b> |
| 39        | <i>NME7</i>          | Non-metastatic cells 7, protein expressed in (nucleoside-diphosphate kinase)       | 227556_at          | 2.99        | NM_013330        |
| 40        | <i>NUCKS1</i>        | Nuclear casein kinase and cyclin-dependent kinase substrate 1                      | 222027_at          | 2.03        | NM_022731        |
| 41        | <i>PNMA2</i>         | Paraneoplastic antigen MA2                                                         | 209598_at          | 2.13        | NM_007257        |
| <b>42</b> | <b><i>TFAP2B</i></b> | <b>Transcription factor AP-2 beta (activating enhancer binding protein 2 beta)</b> | <b>214451_at</b>   | <b>6.68</b> | <b>NM_003221</b> |
| 43        | <i>ENC1</i>          | Ectodermal-neural cortex (with BTB-like domain)                                    | 201340_s_at        | 2.01        | NM_003633        |
| 44        | <i>FAM46B</i>        | Family with sequence similarity 46, member B                                       | 229518_at          | 2.36        | NM_052943        |
| 45        | <i>GNPAT</i>         | Glyceronephosphate O-acyltransferase                                               | 229994_at          | 2.23        | NM_014236        |
| 46        | <i>ALOX5</i>         | Arachidonate 5-lipoxygenase                                                        | 204446_s_at        | 2.19        | NM_000698        |
| 47        | <i>TCN1</i>          | Transcobalamin I (vitamin B12 binding protein, R binder family)                    | 205513_at          | 2.87        | NM_001062        |
| 48        | <i>MAP3K1</i>        | Mitogen-activated protein kinase kinase kinase 1                                   | 243030_at          | 2.49        | NM_005921        |
| 49        | <i>PMEPA1</i>        | Prostate transmembrane protein, androgen induced 1                                 | 222449_at          | 2.02        | NM_020182        |
| 50        | <i>AK5</i>           | Adenylate kinase 5                                                                 | 222862_s_at        | 2.93        | NM_012093        |
| 51        | <i>NFIA</i>          | Nuclear factor I/A                                                                 | 224975_at          | 2.13        | NM_005595        |
| 52        | <i>POSTN</i>         | Periostin, osteoblast specific factor                                              | 228481_at          | 2.72        | NM_006475        |
| 53        | <i>PIK3R1</i>        | Phosphoinositide-3-kinase, regulatory subunit 1 (alpha)                            | 239476_at          | 1.88        | NM_181523        |
| 54        | <i>LIMCH1</i>        | LIM and calponin homology domains 1                                                | 212327_at          | 2.49        | NM_014988        |
| <b>55</b> | <b><i>TMC5</i></b>   | <b>Transmembrane channel-like 5</b>                                                | <b>240304_s_at</b> | <b>4.27</b> | <b>NM_024780</b> |
| 56        | <i>FAM129A</i>       | Family with sequence similarity 129, member A                                      | 217966_s_at        | 2.96        | NM_052966        |

---
