# Supplementary material for: Gene Expression Profiling Reveals New Aspects of PIK3CA Mutation in ERalpha-Positive Breast Cancer: Major Implication of the Wnt Signaling Pathway
Source: PubMed Central journal article supplement (PMC3012715; doi:10.1371/journal.pone.0015647), 2010-12-30
Supplement: pone.0015647.s005.pdf [file pone.0015647.s005.pdf]

| Symbol Gene                 | GenBank   | Exon 9-mutated<br><i>PIK3CA</i> (n=44) | Exon 20-mutated<br><i>PIK3CA</i> (n=47) | FC    | <i>P</i> value |
|-----------------------------|-----------|----------------------------------------|-----------------------------------------|-------|----------------|
| <b>UP-REGULATED GENES</b>   |           |                                        |                                         |       |                |
| <i>ANPEP</i>                | NM_001150 | 0.42 (0.06-14.5)                       | 0.33 (0.07-18.3)                        | 1.29  | ns             |
| <i>CYP4B1</i>               | NM_000779 | 8.5 (0.00-178)                         | 4.38 (0.35-82.3)                        | 1.94  | ns             |
| <i>CYP4X1</i>               | NM_178033 | 3.56 (0.07-101)                        | 3.99 (0.05-51.5)                        | -1.12 | ns             |
| <i>CYP4Z1</i>               | NM_171834 | 3.00 (0.01-254)                        | 3.01 (0.04-120)                         | 1.00  | ns             |
| <i>CYP4Z2P</i>              | NR_002788 | 69.3 (1.43-1069)                       | 66.7 (0.00-486)                         | 1.04  | ns             |
| <i>HMGCS2</i>               | NM_005518 | 0.47 (0.00-25.7)                       | 0.76 (0.00-22.6)                        | -1.62 | ns             |
| <i>ID4</i>                  | NM_001546 | 0.15 (0.03-2.43)                       | 0.21 (0.02-9.57)                        | -1.38 | ns             |
| <i>LIMCH1</i>               | NM_014988 | 1.09 (0.16-8.58)                       | 1.14 (0.08-5.74)                        | -1.05 | ns             |
| <i>LTF</i>                  | NM_002343 | 0.15 (0.01-41.8)                       | 0.13 (0.00-13.6)                        | 1.17  | ns             |
| <i>MAPT</i>                 | NM_016835 | 4.44 (0.86-15.9)                       | 4.54 (0.15-26.2)                        | -1.02 | ns             |
| <i>MSX2</i>                 | NM_002449 | 3.48 (0.32-15.2)                       | 4.07 (0.11-39.3)                        | -1.17 | ns             |
| <i>NR2F2</i>                | NM_021005 | 1.24 (0.17-7.27)                       | 0.92 (0.11-4.40)                        | 1.34  | ns             |
| <i>NRIP3</i>                | NM_020645 | 2.91 (0.10-79.5)                       | 1.77 (0.22-105)                         | 1.65  | 0.0378         |
| <i>NTN4</i>                 | NM_021229 | 1.14 (0.04-10.2)                       | 1.29 (0.14-8.77)                        | -1.14 | ns             |
| <i>PIK3R1</i>               | NM_181523 | 0.36 (0.12-0.98)                       | 0.37 (0.08-1.30)                        | -1.02 | ns             |
| <i>REEP1</i>                | NM_022912 | 2.69 (0.20-16.8)                       | 2.57 (0.19-21.8)                        | 1.05  | ns             |
| <i>SEC14L2</i>              | NM_012429 | 4.97 (0.48-39.1)                       | 3.69 (0.16-36.9)                        | 1.35  | ns             |
| <i>SLC4A4</i>               | NM_003759 | 0.51 (0.00-79.7)                       | 0.39 (0.01-128)                         | 1.29  | ns             |
| <i>SLC40A1</i>              | NM_014585 | 1.21 (0.08-10.6)                       | 1.22 (0.00-17.9)                        | -1.01 | ns             |
| <i>TCF7L2</i>               | NM_030756 | 0.30 (0.13-1.22)                       | 0.35 (0.09-1.26)                        | -1.17 | ns             |
| <i>TFAP2B</i>               | NM_003221 | 3.33 (0.00-179)                        | 8.38 (0.00-117)                         | -2.51 | 0.0334         |
| <i>TMC5</i>                 | NM_024780 | 6.24 (0.11-46.2)                       | 5.42 (0.63-29.3)                        | 1.15  | ns             |
| <i>TNFRSF11B</i>            | NM_002546 | 1.93 (0.15-21.8)                       | 1.76 (0.22-12.4)                        | 1.10  | ns             |
| <i>VANGL2</i>               | NM_020335 | 0.99 (0.14-9.09)                       | 0.64 (0.07-3.47)                        | 1.54  | ns             |
| <i>VTCN1</i>                | NM_024626 | 0.65 (0.01-15.4)                       | 0.64 (0.01-15.1)                        | 1.01  | ns             |
| <i>WNT5A</i>                | NM_003392 | 1.15 (0.35-4.77)                       | 1.19 (0.24-7.27)                        | -1.04 | ns             |
| <b>DOWN-REGULATED GENES</b> |           |                                        |                                         |       |                |
| <i>NKAIN1</i>               | NM_024522 | 67.7 (0.74-560)                        | 45.4 (0.71-560)                         | 1.49  | ns             |
| <i>TPD52</i>                | NM_005079 | 5.40 (2.00-80.9)                       | 5.33 (1.75-34.9)                        | 1.01  | ns             |
| <i>TUSC3</i>                | NM_006765 | 0.65 (0.08-6.31)                       | 0.62 (0.13-2.69)                        | 1.04  | ns             |

ns: not significant
