# Supplementary material for: Gene Expression Profiling Reveals New Aspects of PIK3CA Mutation in ERalpha-Positive Breast Cancer: Major Implication of the Wnt Signaling Pathway
Source: PubMed Central journal article supplement (PMC3012715; doi:10.1371/journal.pone.0015647), 2010-12-30
Supplement: pone.0015647.s006.pdf [file pone.0015647.s006.pdf]

| <b>Discriminating gene set</b>               | <b>Cluster 1</b> | <b>Cluster 2</b> | <b>Accuracy</b> | <b>MCC<sup>a</sup></b> | <b>P value<sup>b</sup></b> |
|----------------------------------------------|------------------|------------------|-----------------|------------------------|----------------------------|
| 18 up-regulated genes                        | 85N+35M          | 72N+57M          | 57.0%           | 0.1555                 | 0.0141                     |
| 18 up-regulated genes + <i>NKAIN1</i>        | 83N+28M          | 74N+64M          | 59.4%           | 0.2178                 | 0.0006                     |
| <i>NKAIN1+CYP4Z2P+WNT5A+TMC5</i>             | 83N+27M          | 74N+65M          | 59.4%           | 0.2286                 | 0.0003                     |
| <i>NKAIN1+CYP4Z2P+WNT5A+MAPT+MSX2+TFAP2B</i> | 83N+27M          | 74N+65M          | 59.4%           | 0.2286                 | 0.0003                     |
| <i>NKAIN1+CYP4Z2P+NRIP3+SEC14L2+TFAP2B</i>   | 82N+26M          | 75N+66M          | 59.4%           | 0.2334                 | 0.0002                     |

<sup>a</sup> Matthews' correlation coefficient.

<sup>b</sup> Chi-square test.
